# Supplementary material
Source: ML conference proceedings conference paper supplement (https://proceedings.neurips.cc/paper_files/paper/2022/hash/31a57804448363bcab777f818f75f5b4-Abstract.html)
Supplement: Supplementary file 1 [file 31a57804448363bcab777f818f75f5b4-Supplemental-Conference.zip]

Archive with 3,981 entries (3,973 files):
- trading_off_resource_budgets_f-Supplementary Material/code_and_data/
- trading_off_resource_budgets_f-Supplementary Material/code_and_data/.DS_Store
- trading_off_resource_budgets_f-Supplementary Material/code_and_data/experiments/
- trading_off_resource_budgets_f-Supplementary Material/code_and_data/experiments/.DS_Store
- trading_off_resource_budgets_f-Supplementary Material/code_and_data/experiments/base_results/
- trading_off_resource_budgets_f-Supplementary Material/code_and_data/experiments/base_results/bo_20220228_124924_b7rkpeqg/
- trading_off_resource_budgets_f-Supplementary Material/code_and_data/experiments/base_results/bo_20220228_124924_b7rkpeqg/suggest_log/
- trading_off_resource_budgets_f-Supplementary Material/code_and_data/experiments/base_results/bo_20220228_124924_b7rkpeqg/suggest_log/0004d0ad96ac5dd7972a2c4ace4ce8a5.json
- trading_off_resource_budgets_f-Supplementary Material/code_and_data/experiments/base_results/bo_20220228_124924_b7rkpeqg/suggest_log/000e563a316d56ad8d0c4b56b2813fe9.json
- trading_off_resource_budgets_f-Supplementary Material/code_and_data/experiments/base_results/bo_20220228_124924_b7rkpeqg/suggest_log/0021158a8681516c99828a8b4bb5056d.json
- trading_off_resource_budgets_f-Supplementary Material/code_and_data/experiments/base_results/bo_20220228_124924_b7rkpeqg/suggest_log/004108c85b14513db9cf8a48c24ccdbc.json
- trading_off_resource_budgets_f-Supplementary Material/code_and_data/experiments/base_results/bo_20220228_124924_b7rkpeqg/suggest_log/0046da4de9c855d593c8f570fd5cf2dd.json
- trading_off_resource_budgets_f-Supplementary Material/code_and_data/experiments/base_results/bo_20220228_124924_b7rkpeqg/suggest_log/0060d88c47ab5518909474c0af8a71a6.json
- trading_off_resource_budgets_f-Supplementary Material/code_and_data/experiments/base_results/bo_20220228_124924_b7rkpeqg/suggest_log/006b9346157e5001bbe5e5cf94ac2911.json
- trading_off_resource_budgets_f-Supplementary Material/code_and_data/experiments/base_results/bo_20220228_124924_b7rkpeqg/suggest_log/007dafb7ea965e399ecc1ac4a28b6fe0.json
- trading_off_resource_budgets_f-Supplementary Material/code_and_data/experiments/base_results/bo_20220228_124924_b7rkpeqg/suggest_log/00956c572ec65475a7e6016e91bb63f1.json
- trading_off_resource_budgets_f-Supplementary Material/code_and_data/experiments/base_results/bo_20220228_124924_b7rkpeqg/suggest_log/00b7ab1a3d495ef696939a4923e60458.json
- trading_off_resource_budgets_f-Supplementary Material/code_and_data/experiments/base_results/bo_20220228_124924_b7rkpeqg/suggest_log/00b9849a9f0d5ebeaffd78bcd998fe38.json
- trading_off_resource_budgets_f-Supplementary Material/code_and_data/experiments/base_results/bo_20220228_124924_b7rkpeqg/suggest_log/00c3efaa9b0c547c989958d01298b65d.json
- trading_off_resource_budgets_f-Supplementary Material/code_and_data/experiments/base_results/bo_20220228_124924_b7rkpeqg/suggest_log/00c8dec721b15570bfc16ce914488c1a.json
- trading_off_resource_budgets_f-Supplementary Material/code_and_data/experiments/base_results/bo_20220228_124924_b7rkpeqg/suggest_log/00d4debd18af585d92dcbfd370690fbc.json
- trading_off_resource_budgets_f-Supplementary Material/code_and_data/experiments/base_results/bo_20220228_124924_b7rkpeqg/suggest_log/00df1d9395c054308243043434692224.json
- trading_off_resource_budgets_f-Supplementary Material/code_and_data/experiments/base_results/bo_20220228_124924_b7rkpeqg/suggest_log/00ed9a2e965259da9803901805d5b36a.json
- trading_off_resource_budgets_f-Supplementary Material/code_and_data/experiments/base_results/bo_20220228_124924_b7rkpeqg/suggest_log/00fae2395c8357ef9bac432fa313d522.json
- trading_off_resource_budgets_f-Supplementary Material/code_and_data/experiments/base_results/bo_20220228_124924_b7rkpeqg/suggest_log/00fd1773d7b85aba80a2c571ddb2fe7c.json
- trading_off_resource_budgets_f-Supplementary Material/code_and_data/experiments/base_results/bo_20220228_124924_b7rkpeqg/suggest_log/0114551789985b5181115febb97f8446.json
- trading_off_resource_budgets_f-Supplementary Material/code_and_data/experiments/base_results/bo_20220228_124924_b7rkpeqg/suggest_log/0128675927e6589ea8ba154ded8cd09a.json
- trading_off_resource_budgets_f-Supplementary Material/code_and_data/experiments/base_results/bo_20220228_124924_b7rkpeqg/suggest_log/01395c2a52ea549ab30f2e60ce9b020f.json
- trading_off_resource_budgets_f-Supplementary Material/code_and_data/experiments/base_results/bo_20220228_124924_b7rkpeqg/suggest_log/0146409341ca54b1b67150cb1bf2e6f3.json
- trading_off_resource_budgets_f-Supplementary Material/code_and_data/experiments/base_results/bo_20220228_124924_b7rkpeqg/suggest_log/014658faa525594796e3dcaac3905993.json
- trading_off_resource_budgets_f-Supplementary Material/code_and_data/experiments/base_results/bo_20220228_124924_b7rkpeqg/suggest_log/01509ba000bb57cb8c39d1bb0d5e7f03.json
- trading_off_resource_budgets_f-Supplementary Material/code_and_data/experiments/base_results/bo_20220228_124924_b7rkpeqg/suggest_log/0166ca06f76e5b02a8d699ed5cf192dc.json
- trading_off_resource_budgets_f-Supplementary Material/code_and_data/experiments/base_results/bo_20220228_124924_b7rkpeqg/suggest_log/01670d7b1fb457f598023dbb5ce259db.json
- trading_off_resource_budgets_f-Supplementary Material/code_and_data/experiments/base_results/bo_20220228_124924_b7rkpeqg/suggest_log/0169abcdd501500fb9f18b08333359aa.json
- trading_off_resource_budgets_f-Supplementary Material/code_and_data/experiments/base_results/bo_20220228_124924_b7rkpeqg/suggest_log/016a5a85decf55f4b1519a88c057c656.json
- trading_off_resource_budgets_f-Supplementary Material/code_and_data/experiments/base_results/bo_20220228_124924_b7rkpeqg/suggest_log/016b4b3b95ca50bfb246751b51521674.json
- trading_off_resource_budgets_f-Supplementary Material/code_and_data/experiments/base_results/bo_20220228_124924_b7rkpeqg/suggest_log/0174c21765605d7fbebe9918362110a7.json
- trading_off_resource_budgets_f-Supplementary Material/code_and_data/experiments/base_results/bo_20220228_124924_b7rkpeqg/suggest_log/017751a550c9522c98c55f8af6f032c4.json
- trading_off_resource_budgets_f-Supplementary Material/code_and_data/experiments/base_results/bo_20220228_124924_b7rkpeqg/suggest_log/0181c9b584d85ab09934dbc41e8e5591.json
- trading_off_resource_budgets_f-Supplementary Material/code_and_data/experiments/base_results/bo_20220228_124924_b7rkpeqg/suggest_log/018e629276875545968705bf6c834c82.json
- trading_off_resource_budgets_f-Supplementary Material/code_and_data/experiments/base_results/bo_20220228_124924_b7rkpeqg/suggest_log/01948a147fd659969d9ef892ed5ec241.json
- trading_off_resource_budgets_f-Supplementary Material/code_and_data/experiments/base_results/bo_20220228_124924_b7rkpeqg/suggest_log/01968bb8152753f6be1006706d71e1cb.json
- trading_off_resource_budgets_f-Supplementary Material/code_and_data/experiments/base_results/bo_20220228_124924_b7rkpeqg/suggest_log/019dbe7b6d22570d9bafb4f74c50b7a9.json
- trading_off_resource_budgets_f-Supplementary Material/code_and_data/experiments/base_results/bo_20220228_124924_b7rkpeqg/suggest_log/019e542bf6c5565081c42b42e6b99d3b.json
- trading_off_resource_budgets_f-Supplementary Material/code_and_data/experiments/base_results/bo_20220228_124924_b7rkpeqg/suggest_log/01c42ac6372351a9bbde9fc1aeced8eb.json
- trading_off_resource_budgets_f-Supplementary Material/code_and_data/experiments/base_results/bo_20220228_124924_b7rkpeqg/suggest_log/01d604c1ee6c55aab25be5963156441d.json
- trading_off_resource_budgets_f-Supplementary Material/code_and_data/experiments/base_results/bo_20220228_124924_b7rkpeqg/suggest_log/01f0c4d57ef45590a0fb9b7109c351ec.json
- trading_off_resource_budgets_f-Supplementary Material/code_and_data/experiments/base_results/bo_20220228_124924_b7rkpeqg/suggest_log/01f647b4493b57e3b75156dedf30abba.json
- trading_off_resource_budgets_f-Supplementary Material/code_and_data/experiments/base_results/bo_20220228_124924_b7rkpeqg/suggest_log/01f7d86409b755b2ac99ca6c80e768a7.json
- trading_off_resource_budgets_f-Supplementary Material/code_and_data/experiments/base_results/bo_20220228_124924_b7rkpeqg/suggest_log/022b5fb1b727541fa0d4e6ff6332399d.json
- trading_off_resource_budgets_f-Supplementary Material/code_and_data/experiments/base_results/bo_20220228_124924_b7rkpeqg/suggest_log/0235ba1450c4554cbddebdca1cfe1484.json
- trading_off_resource_budgets_f-Supplementary Material/code_and_data/experiments/base_results/bo_20220228_124924_b7rkpeqg/suggest_log/023f67fff9f8553cbe05d9bd72ab43c8.json
- trading_off_resource_budgets_f-Supplementary Material/code_and_data/experiments/base_results/bo_20220228_124924_b7rkpeqg/suggest_log/024a16146c0350df96afbf0a56bfdde9.json
- trading_off_resource_budgets_f-Supplementary Material/code_and_data/experiments/base_results/bo_20220228_124924_b7rkpeqg/suggest_log/024d1d3c51f75ee3bf9b0e80d10de3f0.json
- trading_off_resource_budgets_f-Supplementary Material/code_and_data/experiments/base_results/bo_20220228_124924_b7rkpeqg/suggest_log/024def10ebc151d0ae149ee76a5e0449.json
- trading_off_resource_budgets_f-Supplementary Material/code_and_data/experiments/base_results/bo_20220228_124924_b7rkpeqg/suggest_log/026f38add405563692eea1303ae17028.json
- trading_off_resource_budgets_f-Supplementary Material/code_and_data/experiments/base_results/bo_20220228_124924_b7rkpeqg/suggest_log/0271410c4cc15580a88c5ee8b1431ff4.json
- trading_off_resource_budgets_f-Supplementary Material/code_and_data/experiments/base_results/bo_20220228_124924_b7rkpeqg/suggest_log/0285efba6f205ac980083ee9094d7cab.json
- trading_off_resource_budgets_f-Supplementary Material/code_and_data/experiments/base_results/bo_20220228_124924_b7rkpeqg/suggest_log/0291b9da98985c46980380ca01563895.json
- trading_off_resource_budgets_f-Supplementary Material/code_and_data/experiments/base_results/bo_20220228_124924_b7rkpeqg/suggest_log/02a3658b256950bdafeca877e99d0ffb.json
- trading_off_resource_budgets_f-Supplementary Material/code_and_data/experiments/base_results/bo_20220228_124924_b7rkpeqg/suggest_log/02a67d13591b51ac84f15cab7a78d76c.json
- trading_off_resource_budgets_f-Supplementary Material/code_and_data/experiments/base_results/bo_20220228_124924_b7rkpeqg/suggest_log/02d77abe07e5569084b8206dac9c1282.json
- trading_off_resource_budgets_f-Supplementary Material/code_and_data/experiments/base_results/bo_20220228_124924_b7rkpeqg/suggest_log/02eeb8fe3a1b5c808f408dd2276be195.json
- trading_off_resource_budgets_f-Supplementary Material/code_and_data/experiments/base_results/bo_20220228_124924_b7rkpeqg/suggest_log/02f19fddaa3d5222938db5c338068cd6.json
- trading_off_resource_budgets_f-Supplementary Material/code_and_data/experiments/base_results/bo_20220228_124924_b7rkpeqg/suggest_log/02ffc81595da5bc58413d4fba5bc4bcf.json
- trading_off_resource_budgets_f-Supplementary Material/code_and_data/experiments/base_results/bo_20220228_124924_b7rkpeqg/suggest_log/032f6feda7f95f33b4962d0a14f0518c.json
- trading_off_resource_budgets_f-Supplementary Material/code_and_data/experiments/base_results/bo_20220228_124924_b7rkpeqg/suggest_log/03461ce84c975f358b184847e88d64b3.json
- trading_off_resource_budgets_f-Supplementary Material/code_and_data/experiments/base_results/bo_20220228_124924_b7rkpeqg/suggest_log/0379287a86a953cd8bd2ce6f2325de8a.json
- trading_off_resource_budgets_f-Supplementary Material/code_and_data/experiments/base_results/bo_20220228_124924_b7rkpeqg/suggest_log/038a2c5080dc5385b29c779b3037b31a.json
- trading_off_resource_budgets_f-Supplementary Material/code_and_data/experiments/base_results/bo_20220228_124924_b7rkpeqg/suggest_log/039e12d5e7f05e1198f405e8b645181e.json
- trading_off_resource_budgets_f-Supplementary Material/code_and_data/experiments/base_results/bo_20220228_124924_b7rkpeqg/suggest_log/03a8dfd3c38f5df79f13943bfcb6a980.json
- trading_off_resource_budgets_f-Supplementary Material/code_and_data/experiments/base_results/bo_20220228_124924_b7rkpeqg/suggest_log/03c6132625525dd3913d7436e9d5f6ca.json
- trading_off_resource_budgets_f-Supplementary Material/code_and_data/experiments/base_results/bo_20220228_124924_b7rkpeqg/suggest_log/03d925db998c58e5972224c840034c40.json
- trading_off_resource_budgets_f-Supplementary Material/code_and_data/experiments/base_results/bo_20220228_124924_b7rkpeqg/suggest_log/0403618472bf5affb62bc79d3463621e.json
- trading_off_resource_budgets_f-Supplementary Material/code_and_data/experiments/base_results/bo_20220228_124924_b7rkpeqg/suggest_log/0419bda126245f99b999f42811678969.json
- trading_off_resource_budgets_f-Supplementary Material/code_and_data/experiments/base_results/bo_20220228_124924_b7rkpeqg/suggest_log/0428cecbc4e854c3b0bfcbcd7e687f13.json
- trading_off_resource_budgets_f-Supplementary Material/code_and_data/experiments/base_results/bo_20220228_124924_b7rkpeqg/suggest_log/0429ed15adda5655899b1ab4d5d7b9d6.json
- trading_off_resource_budgets_f-Supplementary Material/code_and_data/experiments/base_results/bo_20220228_124924_b7rkpeqg/suggest_log/044bc01c0704518ab6d87e43836381d0.json
- trading_off_resource_budgets_f-Supplementary Material/code_and_data/experiments/base_results/bo_20220228_124924_b7rkpeqg/suggest_log/045cea4c9e015490a845609796a28c40.json
- trading_off_resource_budgets_f-Supplementary Material/code_and_data/experiments/base_results/bo_20220228_124924_b7rkpeqg/suggest_log/047207897cc85fdda2bb87c784cbd889.json
- trading_off_resource_budgets_f-Supplementary Material/code_and_data/experiments/base_results/bo_20220228_124924_b7rkpeqg/suggest_log/048e8b8395b45943bde8d98f1da30cdc.json
- trading_off_resource_budgets_f-Supplementary Material/code_and_data/experiments/base_results/bo_20220228_124924_b7rkpeqg/suggest_log/049c45915d75585cba6d636c2c2566a6.json
- trading_off_resource_budgets_f-Supplementary Material/code_and_data/experiments/base_results/bo_20220228_124924_b7rkpeqg/suggest_log/049fc43e299c5f7ba019556cf563338c.json
- trading_off_resource_budgets_f-Supplementary Material/code_and_data/experiments/base_results/bo_20220228_124924_b7rkpeqg/suggest_log/04cbeff26e7f521890f2c0eda4161e2a.json
- trading_off_resource_budgets_f-Supplementary Material/code_and_data/experiments/base_results/bo_20220228_124924_b7rkpeqg/suggest_log/04cdf48ea10650bf94ba2ea437221fe8.json
- trading_off_resource_budgets_f-Supplementary Material/code_and_data/experiments/base_results/bo_20220228_124924_b7rkpeqg/suggest_log/050157aaaa81559685e949ef9217d9ac.json
- trading_off_resource_budgets_f-Supplementary Material/code_and_data/experiments/base_results/bo_20220228_124924_b7rkpeqg/suggest_log/0509f778a8965a19b3427cdb34805b1c.json
- trading_off_resource_budgets_f-Supplementary Material/code_and_data/experiments/base_results/bo_20220228_124924_b7rkpeqg/suggest_log/05111c07708b50dc87be539e08784937.json
- trading_off_resource_budgets_f-Supplementary Material/code_and_data/experiments/base_results/bo_20220228_124924_b7rkpeqg/suggest_log/0540a5714d555c24b4db271d34b54935.json
- trading_off_resource_budgets_f-Supplementary Material/code_and_data/experiments/base_results/bo_20220228_124924_b7rkpeqg/suggest_log/05471bd2d85e516cb9657d1b1caffbc6.json
- trading_off_resource_budgets_f-Supplementary Material/code_and_data/experiments/base_results/bo_20220228_124924_b7rkpeqg/suggest_log/055528ce358d5789943b1c99ced4a8a9.json
- trading_off_resource_budgets_f-Supplementary Material/code_and_data/experiments/base_results/bo_20220228_124924_b7rkpeqg/suggest_log/0560ef5391f55d59b343daee5f28a0dc.json
- trading_off_resource_budgets_f-Supplementary Material/code_and_data/experiments/base_results/bo_20220228_124924_b7rkpeqg/suggest_log/056da451151254ce86d2319fa002f1ce.json
- trading_off_resource_budgets_f-Supplementary Material/code_and_data/experiments/base_results/bo_20220228_124924_b7rkpeqg/suggest_log/05b9d29426385a87b79704b1bcb35f16.json
- trading_off_resource_budgets_f-Supplementary Material/code_and_data/experiments/base_results/bo_20220228_124924_b7rkpeqg/suggest_log/05dbf8bee83552528a14beec8113cc84.json
- trading_off_resource_budgets_f-Supplementary Material/code_and_data/experiments/base_results/bo_20220228_124924_b7rkpeqg/suggest_log/0609f266cea05aea88b0ef159643edf2.json
- trading_off_resource_budgets_f-Supplementary Material/code_and_data/experiments/base_results/bo_20220228_124924_b7rkpeqg/suggest_log/063b6a5c15e55b2294d591e7584659dd.json
- trading_off_resource_budgets_f-Supplementary Material/code_and_data/experiments/base_results/bo_20220228_124924_b7rkpeqg/suggest_log/0641541d1f1755c1ab40aad7c0f5728f.json
- trading_off_resource_budgets_f-Supplementary Material/code_and_data/experiments/base_results/bo_20220228_124924_b7rkpeqg/suggest_log/065d36065bbd5ffa96eeb5db7a9029d6.json
- trading_off_resource_budgets_f-Supplementary Material/code_and_data/experiments/base_results/bo_20220228_124924_b7rkpeqg/suggest_log/06781247803c52ed827ac3739dcc11ba.json
- trading_off_resource_budgets_f-Supplementary Material/code_and_data/experiments/base_results/bo_20220228_124924_b7rkpeqg/suggest_log/067f2436e19b5937ad3bdcfab598e079.json
- trading_off_resource_budgets_f-Supplementary Material/code_and_data/experiments/base_results/bo_20220228_124924_b7rkpeqg/suggest_log/068da9f602af541dad913bf6aaa52f11.json
- trading_off_resource_budgets_f-Supplementary Material/code_and_data/experiments/base_results/bo_20220228_124924_b7rkpeqg/suggest_log/0697222643575312a68e44c193297009.json
- trading_off_resource_budgets_f-Supplementary Material/code_and_data/experiments/base_results/bo_20220228_124924_b7rkpeqg/suggest_log/069f55e090b45c639c36471d21f9fb45.json
- trading_off_resource_budgets_f-Supplementary Material/code_and_data/experiments/base_results/bo_20220228_124924_b7rkpeqg/suggest_log/06b54d63c2f15d329f260d2c4728f9de.json
- trading_off_resource_budgets_f-Supplementary Material/code_and_data/experiments/base_results/bo_20220228_124924_b7rkpeqg/suggest_log/06c4229bd00c5689941d382d119981cf.json
- trading_off_resource_budgets_f-Supplementary Material/code_and_data/experiments/base_results/bo_20220228_124924_b7rkpeqg/suggest_log/06c5f7a55b8f5601b97463e7be443ca7.json
- trading_off_resource_budgets_f-Supplementary Material/code_and_data/experiments/base_results/bo_20220228_124924_b7rkpeqg/suggest_log/06df07d09c255ceea6092da3b8e46a37.json
- trading_off_resource_budgets_f-Supplementary Material/code_and_data/experiments/base_results/bo_20220228_124924_b7rkpeqg/suggest_log/06ef2cb08670525e86ad47db4dd06f47.json
- trading_off_resource_budgets_f-Supplementary Material/code_and_data/experiments/base_results/bo_20220228_124924_b7rkpeqg/suggest_log/06f1a2a840ce5de1bd452eb1b2f20045.json
- trading_off_resource_budgets_f-Supplementary Material/code_and_data/experiments/base_results/bo_20220228_124924_b7rkpeqg/suggest_log/07000cc6710459698f6b36f04b3cd4c2.json
- trading_off_resource_budgets_f-Supplementary Material/code_and_data/experiments/base_results/bo_20220228_124924_b7rkpeqg/suggest_log/070413f1247b5ce78ff390890834bfb8.json
- trading_off_resource_budgets_f-Supplementary Material/code_and_data/experiments/base_results/bo_20220228_124924_b7rkpeqg/suggest_log/070757b8c1a8551a958b6ec949ebd38a.json
- trading_off_resource_budgets_f-Supplementary Material/code_and_data/experiments/base_results/bo_20220228_124924_b7rkpeqg/suggest_log/072ea477071255918e711a37615910a4.json
- trading_off_resource_budgets_f-Supplementary Material/code_and_data/experiments/base_results/bo_20220228_124924_b7rkpeqg/suggest_log/0767b72766b653969ae9a523de2d323e.json
- trading_off_resource_budgets_f-Supplementary Material/code_and_data/experiments/base_results/bo_20220228_124924_b7rkpeqg/suggest_log/0770688202035e29999b760a13476ddc.json
- trading_off_resource_budgets_f-Supplementary Material/code_and_data/experiments/base_results/bo_20220228_124924_b7rkpeqg/suggest_log/078c6f8205e55415ba298f4edfde2c8f.json
- trading_off_resource_budgets_f-Supplementary Material/code_and_data/experiments/base_results/bo_20220228_124924_b7rkpeqg/suggest_log/079e637afb8d5945a75f47b236752813.json
- trading_off_resource_budgets_f-Supplementary Material/code_and_data/experiments/base_results/bo_20220228_124924_b7rkpeqg/suggest_log/07a12d7dce6b5321a7ee6ee6fd597009.json
- trading_off_resource_budgets_f-Supplementary Material/code_and_data/experiments/base_results/bo_20220228_124924_b7rkpeqg/suggest_log/07db0a2dd9b953778057550f933e5c80.json
- trading_off_resource_budgets_f-Supplementary Material/code_and_data/experiments/base_results/bo_20220228_124924_b7rkpeqg/suggest_log/07f93e12299d5095b92883904ccecc59.json
- trading_off_resource_budgets_f-Supplementary Material/code_and_data/experiments/base_results/bo_20220228_124924_b7rkpeqg/suggest_log/08478f2f5f60576c85e261a837c1928c.json
- trading_off_resource_budgets_f-Supplementary Material/code_and_data/experiments/base_results/bo_20220228_124924_b7rkpeqg/suggest_log/084ff4dff6da587bb09e9e00073c186d.json
- trading_off_resource_budgets_f-Supplementary Material/code_and_data/experiments/base_results/bo_20220228_124924_b7rkpeqg/suggest_log/085cae829f0b531f9b82ea9f34925cb4.json
- trading_off_resource_budgets_f-Supplementary Material/code_and_data/experiments/base_results/bo_20220228_124924_b7rkpeqg/suggest_log/08698f5c63b254958afb157950e01527.json
- trading_off_resource_budgets_f-Supplementary Material/code_and_data/experiments/base_results/bo_20220228_124924_b7rkpeqg/suggest_log/0889b1a2b43c5acb800cad242a7ab0ec.json
- trading_off_resource_budgets_f-Supplementary Material/code_and_data/experiments/base_results/bo_20220228_124924_b7rkpeqg/suggest_log/0895f09e28dc581bbca953bb28aec845.json
- trading_off_resource_budgets_f-Supplementary Material/code_and_data/experiments/base_results/bo_20220228_124924_b7rkpeqg/suggest_log/08a04a2f27e557ec919925572cdfd1a8.json
- trading_off_resource_budgets_f-Supplementary Material/code_and_data/experiments/base_results/bo_20220228_124924_b7rkpeqg/suggest_log/08b4776df9f556958f9d123063082efe.json
- trading_off_resource_budgets_f-Supplementary Material/code_and_data/experiments/base_results/bo_20220228_124924_b7rkpeqg/suggest_log/08c7ab5e8e57566c94426fbaf8c176b5.json
- trading_off_resource_budgets_f-Supplementary Material/code_and_data/experiments/base_results/bo_20220228_124924_b7rkpeqg/suggest_log/08e4d1a9138c5898a78c75ce60b61e10.json
- trading_off_resource_budgets_f-Supplementary Material/code_and_data/experiments/base_results/bo_20220228_124924_b7rkpeqg/suggest_log/08e584db1e3b5fc08bbb625f239a1575.json
- trading_off_resource_budgets_f-Supplementary Material/code_and_data/experiments/base_results/bo_20220228_124924_b7rkpeqg/suggest_log/08f2b2e4c3a35b6bbd049a79816becae.json
- trading_off_resource_budgets_f-Supplementary Material/code_and_data/experiments/base_results/bo_20220228_124924_b7rkpeqg/suggest_log/08f2d012726651cdb033fe409eeb35c7.json
- trading_off_resource_budgets_f-Supplementary Material/code_and_data/experiments/base_results/bo_20220228_124924_b7rkpeqg/suggest_log/090cf5ec5ca0511d95ddeff1a8efe958.json
- trading_off_resource_budgets_f-Supplementary Material/code_and_data/experiments/base_results/bo_20220228_124924_b7rkpeqg/suggest_log/090e0b687144595b9a979bfb26e7eb5c.json
- trading_off_resource_budgets_f-Supplementary Material/code_and_data/experiments/base_results/bo_20220228_124924_b7rkpeqg/suggest_log/09291b3271ba56ef83f7cfae37dac8e9.json
- trading_off_resource_budgets_f-Supplementary Material/code_and_data/experiments/base_results/bo_20220228_124924_b7rkpeqg/suggest_log/0930e9bb677e548a89d86d7e3ea2b290.json
- trading_off_resource_budgets_f-Supplementary Material/code_and_data/experiments/base_results/bo_20220228_124924_b7rkpeqg/suggest_log/098d6450ae2d5ccbae50cb1e82546b86.json
- trading_off_resource_budgets_f-Supplementary Material/code_and_data/experiments/base_results/bo_20220228_124924_b7rkpeqg/suggest_log/0994232f8aa558409cbde074a74c8602.json
- trading_off_resource_budgets_f-Supplementary Material/code_and_data/experiments/base_results/bo_20220228_124924_b7rkpeqg/suggest_log/09a0b444d4925d0ca3efabf542bb1817.json
- trading_off_resource_budgets_f-Supplementary Material/code_and_data/experiments/base_results/bo_20220228_124924_b7rkpeqg/suggest_log/09be4d4111ac57c3890f6565a9f7a5c5.json
- trading_off_resource_budgets_f-Supplementary Material/code_and_data/experiments/base_results/bo_20220228_124924_b7rkpeqg/suggest_log/09e9180ea6275500a236d6b661697077.json
- trading_off_resource_budgets_f-Supplementary Material/code_and_data/experiments/base_results/bo_20220228_124924_b7rkpeqg/suggest_log/09f129e99fe65615bc224db0bf8d3cfc.json
- trading_off_resource_budgets_f-Supplementary Material/code_and_data/experiments/base_results/bo_20220228_124924_b7rkpeqg/suggest_log/0a047b5d5a5a5ca89fcda8e76ac324cc.json
- trading_off_resource_budgets_f-Supplementary Material/code_and_data/experiments/base_results/bo_20220228_124924_b7rkpeqg/suggest_log/0a1c404acf085d0a8d306c48c97b9f7d.json
- trading_off_resource_budgets_f-Supplementary Material/code_and_data/experiments/base_results/bo_20220228_124924_b7rkpeqg/suggest_log/0a2151eba2e6576f91c5d4f350955328.json
- trading_off_resource_budgets_f-Supplementary Material/code_and_data/experiments/base_results/bo_20220228_124924_b7rkpeqg/suggest_log/0a3462316baf545dac8d5f89f1cc54e3.json
- trading_off_resource_budgets_f-Supplementary Material/code_and_data/experiments/base_results/bo_20220228_124924_b7rkpeqg/suggest_log/0a44c4c414ab5b869bbb97f4b327b94a.json
- trading_off_resource_budgets_f-Supplementary Material/code_and_data/experiments/base_results/bo_20220228_124924_b7rkpeqg/suggest_log/0a56e1b144af55c5acc106c9698d0b30.json
- trading_off_resource_budgets_f-Supplementary Material/code_and_data/experiments/base_results/bo_20220228_124924_b7rkpeqg/suggest_log/0a6a9487597f5f0c9566f75e17f41b69.json
- trading_off_resource_budgets_f-Supplementary Material/code_and_data/experiments/base_results/bo_20220228_124924_b7rkpeqg/suggest_log/0a70d37d70d35ec9afd5cc5a46fedfb6.json
- trading_off_resource_budgets_f-Supplementary Material/code_and_data/experiments/base_results/bo_20220228_124924_b7rkpeqg/suggest_log/0a7849c61dc35d049984abfb628f63ac.json
- trading_off_resource_budgets_f-Supplementary Material/code_and_data/experiments/base_results/bo_20220228_124924_b7rkpeqg/suggest_log/0a8d571e5e09589b95929a41ecfc2634.json
- trading_off_resource_budgets_f-Supplementary Material/code_and_data/experiments/base_results/bo_20220228_124924_b7rkpeqg/suggest_log/0aa8b803021d50eead85f3bac9844aba.json
- trading_off_resource_budgets_f-Supplementary Material/code_and_data/experiments/base_results/bo_20220228_124924_b7rkpeqg/suggest_log/0ac959b8e1b95518813bd14d7c628fc6.json
- trading_off_resource_budgets_f-Supplementary Material/code_and_data/experiments/base_results/bo_20220228_124924_b7rkpeqg/suggest_log/0ad545bf5b445995ab6a0e4a90f44b37.json
- trading_off_resource_budgets_f-Supplementary Material/code_and_data/experiments/base_results/bo_20220228_124924_b7rkpeqg/suggest_log/0af4a9983bd05e20b01951eacf109af7.json
- trading_off_resource_budgets_f-Supplementary Material/code_and_data/experiments/base_results/bo_20220228_124924_b7rkpeqg/suggest_log/0b0616ee3edc5ffa92ca426571ea2e1d.json
- trading_off_resource_budgets_f-Supplementary Material/code_and_data/experiments/base_results/bo_20220228_124924_b7rkpeqg/suggest_log/0b135313106f58a19225cf831b976962.json
- trading_off_resource_budgets_f-Supplementary Material/code_and_data/experiments/base_results/bo_20220228_124924_b7rkpeqg/suggest_log/0b13ec298d6153739126bf13ee83482e.json
- trading_off_resource_budgets_f-Supplementary Material/code_and_data/experiments/base_results/bo_20220228_124924_b7rkpeqg/suggest_log/0b353517990a59b098bfafc0f1aae2a5.json
- trading_off_resource_budgets_f-Supplementary Material/code_and_data/experiments/base_results/bo_20220228_124924_b7rkpeqg/suggest_log/0b367d7c2b0e57ed9dd3363ac6d11c07.json
- trading_off_resource_budgets_f-Supplementary Material/code_and_data/experiments/base_results/bo_20220228_124924_b7rkpeqg/suggest_log/0b3a0c1838365a858f9d413c0e998a70.json
- trading_off_resource_budgets_f-Supplementary Material/code_and_data/experiments/base_results/bo_20220228_124924_b7rkpeqg/suggest_log/0b5159ec3609517f819438d28566adf0.json
- trading_off_resource_budgets_f-Supplementary Material/code_and_data/experiments/base_results/bo_20220228_124924_b7rkpeqg/suggest_log/0b5e6ccef5f554df8eec18310a720c24.json
- trading_off_resource_budgets_f-Supplementary Material/code_and_data/experiments/base_results/bo_20220228_124924_b7rkpeqg/suggest_log/0b6e7da4b89453839e775b45ec44b042.json
- trading_off_resource_budgets_f-Supplementary Material/code_and_data/experiments/base_results/bo_20220228_124924_b7rkpeqg/suggest_log/0b80cab269365642b6723a65884b4444.json
- trading_off_resource_budgets_f-Supplementary Material/code_and_data/experiments/base_results/bo_20220228_124924_b7rkpeqg/suggest_log/0b918dbc9d785563a093730664265cd2.json
- trading_off_resource_budgets_f-Supplementary Material/code_and_data/experiments/base_results/bo_20220228_124924_b7rkpeqg/suggest_log/0ba6f3f4176b5cbea96fe80bfbaf94d2.json
- trading_off_resource_budgets_f-Supplementary Material/code_and_data/experiments/base_results/bo_20220228_124924_b7rkpeqg/suggest_log/0bae4ffb4da35dd180f0e4f31e00e29d.json
- trading_off_resource_budgets_f-Supplementary Material/code_and_data/experiments/base_results/bo_20220228_124924_b7rkpeqg/suggest_log/0bf960c694495fe790e17db0435289cd.json
- trading_off_resource_budgets_f-Supplementary Material/code_and_data/experiments/base_results/bo_20220228_124924_b7rkpeqg/suggest_log/0c1f0b4e15a558de93bf45a7b9c61253.json
- trading_off_resource_budgets_f-Supplementary Material/code_and_data/experiments/base_results/bo_20220228_124924_b7rkpeqg/suggest_log/0c2bcbe14f1b5d9ca4341653584b73b1.json
- trading_off_resource_budgets_f-Supplementary Material/code_and_data/experiments/base_results/bo_20220228_124924_b7rkpeqg/suggest_log/0c3d9caece16507d9549e93b22027e9f.json
- trading_off_resource_budgets_f-Supplementary Material/code_and_data/experiments/base_results/bo_20220228_124924_b7rkpeqg/suggest_log/0c4222baa4e850d6b84bcb6a9cd674eb.json
- trading_off_resource_budgets_f-Supplementary Material/code_and_data/experiments/base_results/bo_20220228_124924_b7rkpeqg/suggest_log/0c820c301efb5f288a3e101bc5dd7faf.json
- trading_off_resource_budgets_f-Supplementary Material/code_and_data/experiments/base_results/bo_20220228_124924_b7rkpeqg/suggest_log/0ca15a845a805278bdf3bde5a34cbd02.json
- trading_off_resource_budgets_f-Supplementary Material/code_and_data/experiments/base_results/bo_20220228_124924_b7rkpeqg/suggest_log/0caf6d60dcd55d9d82726e3dc01dc8f0.json
- trading_off_resource_budgets_f-Supplementary Material/code_and_data/experiments/base_results/bo_20220228_124924_b7rkpeqg/suggest_log/0cbc9bb6dab5567193603183ea827628.json
- trading_off_resource_budgets_f-Supplementary Material/code_and_data/experiments/base_results/bo_20220228_124924_b7rkpeqg/suggest_log/0cde1abec9085f20ab57a006814413e1.json
- trading_off_resource_budgets_f-Supplementary Material/code_and_data/experiments/base_results/bo_20220228_124924_b7rkpeqg/suggest_log/0ce11a63bc4e573489c274f42bd1667f.json
- trading_off_resource_budgets_f-Supplementary Material/code_and_data/experiments/base_results/bo_20220228_124924_b7rkpeqg/suggest_log/0ce2589a918156e386b76211a62448d4.json
- trading_off_resource_budgets_f-Supplementary Material/code_and_data/experiments/base_results/bo_20220228_124924_b7rkpeqg/suggest_log/0d1306a861ea5c4dbc396e75ec114ef1.json
- trading_off_resource_budgets_f-Supplementary Material/code_and_data/experiments/base_results/bo_20220228_124924_b7rkpeqg/suggest_log/0d2a91d132035ec89e024bb338b77d4e.json
- trading_off_resource_budgets_f-Supplementary Material/code_and_data/experiments/base_results/bo_20220228_124924_b7rkpeqg/suggest_log/0d3f841daccc5cb187f8c1923206754a.json
- trading_off_resource_budgets_f-Supplementary Material/code_and_data/experiments/base_results/bo_20220228_124924_b7rkpeqg/suggest_log/0d4bff367b905cbd956010e1126d39d7.json
- trading_off_resource_budgets_f-Supplementary Material/code_and_data/experiments/base_results/bo_20220228_124924_b7rkpeqg/suggest_log/0d581efe52275e8d8f22f62cfbe9319d.json
- trading_off_resource_budgets_f-Supplementary Material/code_and_data/experiments/base_results/bo_20220228_124924_b7rkpeqg/suggest_log/0d5a9b9193965a319e0af8eefb97ee35.json
- trading_off_resource_budgets_f-Supplementary Material/code_and_data/experiments/base_results/bo_20220228_124924_b7rkpeqg/suggest_log/0d5f0a8564765577b7c50bab6b1f7125.json
- trading_off_resource_budgets_f-Supplementary Material/code_and_data/experiments/base_results/bo_20220228_124924_b7rkpeqg/suggest_log/0d6b9e0cb3d553819a071e0bc34c519e.json
- trading_off_resource_budgets_f-Supplementary Material/code_and_data/experiments/base_results/bo_20220228_124924_b7rkpeqg/suggest_log/0d7c41b59373504cb67df5388acc07a2.json
- trading_off_resource_budgets_f-Supplementary Material/code_and_data/experiments/base_results/bo_20220228_124924_b7rkpeqg/suggest_log/0d99d4a87dfc59f9872cd2f1dd5973d8.json
- trading_off_resource_budgets_f-Supplementary Material/code_and_data/experiments/base_results/bo_20220228_124924_b7rkpeqg/suggest_log/0da4241049db5c7c827dbe591cf53667.json
- trading_off_resource_budgets_f-Supplementary Material/code_and_data/experiments/base_results/bo_20220228_124924_b7rkpeqg/suggest_log/0da8df9b9c50565198db38b7fa9ef5e3.json
- trading_off_resource_budgets_f-Supplementary Material/code_and_data/experiments/base_results/bo_20220228_124924_b7rkpeqg/suggest_log/0dbc8798204b58c9ba0e5f7d434b6f46.json
- trading_off_resource_budgets_f-Supplementary Material/code_and_data/experiments/base_results/bo_20220228_124924_b7rkpeqg/suggest_log/0de70855eb8253b191a174541eed1f8e.json
- trading_off_resource_budgets_f-Supplementary Material/code_and_data/experiments/base_results/bo_20220228_124924_b7rkpeqg/suggest_log/0ded79bc1e625d3185ced10904c5f988.json
- trading_off_resource_budgets_f-Supplementary Material/code_and_data/experiments/base_results/bo_20220228_124924_b7rkpeqg/suggest_log/0def4476142c5067872e8a54f554d9e7.json
- trading_off_resource_budgets_f-Supplementary Material/code_and_data/experiments/base_results/bo_20220228_124924_b7rkpeqg/suggest_log/0dfc5d0db5535aa495c862695779ef1e.json
- trading_off_resource_budgets_f-Supplementary Material/code_and_data/experiments/base_results/bo_20220228_124924_b7rkpeqg/suggest_log/0dfeff921de650eba25145999983a17f.json
- trading_off_resource_budgets_f-Supplementary Material/code_and_data/experiments/base_results/bo_20220228_124924_b7rkpeqg/suggest_log/0e0801503176523f99134c4a42dc93dc.json
- trading_off_resource_budgets_f-Supplementary Material/code_and_data/experiments/base_results/bo_20220228_124924_b7rkpeqg/suggest_log/0e0e61b5679c531abec4b55f758bb0c9.json
- trading_off_resource_budgets_f-Supplementary Material/code_and_data/experiments/base_results/bo_20220228_124924_b7rkpeqg/suggest_log/0e16548b54b95ba089fdb82570791bba.json
- trading_off_resource_budgets_f-Supplementary Material/code_and_data/experiments/base_results/bo_20220228_124924_b7rkpeqg/suggest_log/0e318a26d21e59b9bbc6a8fedcb861da.json
- trading_off_resource_budgets_f-Supplementary Material/code_and_data/experiments/base_results/bo_20220228_124924_b7rkpeqg/suggest_log/0e76c6a143a35e548c6143a52e1bc0b1.json
- trading_off_resource_budgets_f-Supplementary Material/code_and_data/experiments/base_results/bo_20220228_124924_b7rkpeqg/suggest_log/0e7a034350be5eb0bdcebd2c144dd1d1.json
- trading_off_resource_budgets_f-Supplementary Material/code_and_data/experiments/base_results/bo_20220228_124924_b7rkpeqg/suggest_log/0e7d99231b795d3eb61f5aaf9acae7c9.json
- trading_off_resource_budgets_f-Supplementary Material/code_and_data/experiments/base_results/bo_20220228_124924_b7rkpeqg/suggest_log/0e99c4bd8e3a57c884de36e963713c4a.json
- trading_off_resource_budgets_f-Supplementary Material/code_and_data/experiments/base_results/bo_20220228_124924_b7rkpeqg/suggest_log/0ea6d3d9d152507b916f1db9061364e2.json
- trading_off_resource_budgets_f-Supplementary Material/code_and_data/experiments/base_results/bo_20220228_124924_b7rkpeqg/suggest_log/0ed1c2700ad75108842dc21e3dfd70c0.json
- trading_off_resource_budgets_f-Supplementary Material/code_and_data/experiments/base_results/bo_20220228_124924_b7rkpeqg/suggest_log/0eda8c55021859f095e6b0c45ae8a6f7.json
- trading_off_resource_budgets_f-Supplementary Material/code_and_data/experiments/base_results/bo_20220228_124924_b7rkpeqg/suggest_log/0ef2b445a9ae59e8a6bda42b521d738c.json
- trading_off_resource_budgets_f-Supplementary Material/code_and_data/experiments/base_results/bo_20220228_124924_b7rkpeqg/suggest_log/0f1e938fe936535ba2079ad412f75f93.json
- trading_off_resource_budgets_f-Supplementary Material/code_and_data/experiments/base_results/bo_20220228_124924_b7rkpeqg/suggest_log/0f410bab30ff58dbac68687c56acceeb.json
- trading_off_resource_budgets_f-Supplementary Material/code_and_data/experiments/base_results/bo_20220228_124924_b7rkpeqg/suggest_log/0f43234577a450ef86530a930ec4b7ea.json
- trading_off_resource_budgets_f-Supplementary Material/code_and_data/experiments/base_results/bo_20220228_124924_b7rkpeqg/suggest_log/0f494350558554f5ae06cd8d54ff3409.json
- trading_off_resource_budgets_f-Supplementary Material/code_and_data/experiments/base_results/bo_20220228_124924_b7rkpeqg/suggest_log/0f4c094d4f4b57ec9112891232d9d94a.json
- trading_off_resource_budgets_f-Supplementary Material/code_and_data/experiments/base_results/bo_20220228_124924_b7rkpeqg/suggest_log/0f586dc1cc395c23927932d3307f0865.json
- trading_off_resource_budgets_f-Supplementary Material/code_and_data/experiments/base_results/bo_20220228_124924_b7rkpeqg/suggest_log/0f8014915dda57029f0b68c665314908.json
- trading_off_resource_budgets_f-Supplementary Material/code_and_data/experiments/base_results/bo_20220228_124924_b7rkpeqg/suggest_log/0f80fc03197b5bc8a527864d1a805ed7.json
- trading_off_resource_budgets_f-Supplementary Material/code_and_data/experiments/base_results/bo_20220228_124924_b7rkpeqg/suggest_log/0f85238b92535555adf08a85716d2d59.json
- trading_off_resource_budgets_f-Supplementary Material/code_and_data/experiments/base_results/bo_20220228_124924_b7rkpeqg/suggest_log/0f8db0cdbeac53cdbf405a1cc2eb9adc.json
- trading_off_resource_budgets_f-Supplementary Material/code_and_data/experiments/base_results/bo_20220228_124924_b7rkpeqg/suggest_log/0f8ea35da8d15930a8f15f3dac55f5b4.json
- trading_off_resource_budgets_f-Supplementary Material/code_and_data/experiments/base_results/bo_20220228_124924_b7rkpeqg/suggest_log/0f95b70918735f97a2971b579233a7b0.json
- trading_off_resource_budgets_f-Supplementary Material/code_and_data/experiments/base_results/bo_20220228_124924_b7rkpeqg/suggest_log/0fb31becc202574c930a6d11ff703838.json
- trading_off_resource_budgets_f-Supplementary Material/code_and_data/experiments/base_results/bo_20220228_124924_b7rkpeqg/suggest_log/0fdc3457dedc52b290bb3e754a93c99d.json
- trading_off_resource_budgets_f-Supplementary Material/code_and_data/experiments/base_results/bo_20220228_124924_b7rkpeqg/suggest_log/0fde944deaba58608939a721482caa72.json
- trading_off_resource_budgets_f-Supplementary Material/code_and_data/experiments/base_results/bo_20220228_124924_b7rkpeqg/suggest_log/0fe2883859065336bc02ec8f7bcb9b00.json
- trading_off_resource_budgets_f-Supplementary Material/code_and_data/experiments/base_results/bo_20220228_124924_b7rkpeqg/suggest_log/0fe5d3b8e31050afa3ec8c8afb8c372e.json
- trading_off_resource_budgets_f-Supplementary Material/code_and_data/experiments/base_results/bo_20220228_124924_b7rkpeqg/suggest_log/0fe8b3ae04b5518e89c615edb1f9e148.json
- trading_off_resource_budgets_f-Supplementary Material/code_and_data/experiments/base_results/bo_20220228_124924_b7rkpeqg/suggest_log/0ff792055412533d8fb665757a9fb973.json
- trading_off_resource_budgets_f-Supplementary Material/code_and_data/experiments/base_results/bo_20220228_124924_b7rkpeqg/suggest_log/0ffc7c7512665795964e399404bea133.json
- trading_off_resource_budgets_f-Supplementary Material/code_and_data/experiments/base_results/bo_20220228_124924_b7rkpeqg/suggest_log/100a9d12ca675f4fa9b09bd8b52595a0.json
- trading_off_resource_budgets_f-Supplementary Material/code_and_data/experiments/base_results/bo_20220228_124924_b7rkpeqg/suggest_log/1025ed29bec15113b42757ad1236559a.json
- trading_off_resource_budgets_f-Supplementary Material/code_and_data/experiments/base_results/bo_20220228_124924_b7rkpeqg/suggest_log/104031c0dde556eb9bf7fcb61be2623c.json
- trading_off_resource_budgets_f-Supplementary Material/code_and_data/experiments/base_results/bo_20220228_124924_b7rkpeqg/suggest_log/10522fc63ab35e64be0dcd1ab51dde1e.json
- trading_off_resource_budgets_f-Supplementary Material/code_and_data/experiments/base_results/bo_20220228_124924_b7rkpeqg/suggest_log/106453f42a4659c7ab1d0e65d1035680.json
- trading_off_resource_budgets_f-Supplementary Material/code_and_data/experiments/base_results/bo_20220228_124924_b7rkpeqg/suggest_log/107585a2d638574fbd28ccb4e2c705c8.json
- trading_off_resource_budgets_f-Supplementary Material/code_and_data/experiments/base_results/bo_20220228_124924_b7rkpeqg/suggest_log/1075efc47f3f504b9ac106b8f3f66f09.json
- trading_off_resource_budgets_f-Supplementary Material/code_and_data/experiments/base_results/bo_20220228_124924_b7rkpeqg/suggest_log/1077436a323c552cad68c0a77dca2e88.json
- trading_off_resource_budgets_f-Supplementary Material/code_and_data/experiments/base_results/bo_20220228_124924_b7rkpeqg/suggest_log/10929b3bbb2c58d2a34f319d033825d8.json
- trading_off_resource_budgets_f-Supplementary Material/code_and_data/experiments/base_results/bo_20220228_124924_b7rkpeqg/suggest_log/109428ce2bf155519cbbd688d303399d.json
- trading_off_resource_budgets_f-Supplementary Material/code_and_data/experiments/base_results/bo_20220228_124924_b7rkpeqg/suggest_log/109634f4a2215d098037a066060db34c.json
- trading_off_resource_budgets_f-Supplementary Material/code_and_data/experiments/base_results/bo_20220228_124924_b7rkpeqg/suggest_log/109d8ab41d3e512cb476b71578b25142.json
- trading_off_resource_budgets_f-Supplementary Material/code_and_data/experiments/base_results/bo_20220228_124924_b7rkpeqg/suggest_log/10b49b4de62356d6b38aabfd15fd203a.json
- trading_off_resource_budgets_f-Supplementary Material/code_and_data/experiments/base_results/bo_20220228_124924_b7rkpeqg/suggest_log/10ba4a278af55792822e9ef8869e8448.json
- trading_off_resource_budgets_f-Supplementary Material/code_and_data/experiments/base_results/bo_20220228_124924_b7rkpeqg/suggest_log/10d0fda8d69854478302ec7255e0a745.json
- trading_off_resource_budgets_f-Supplementary Material/code_and_data/experiments/base_results/bo_20220228_124924_b7rkpeqg/suggest_log/10e4a3f2def251489743453922301eed.json
- trading_off_resource_budgets_f-Supplementary Material/code_and_data/experiments/base_results/bo_20220228_124924_b7rkpeqg/suggest_log/10eb6b1b5e2551598665a96740376544.json
- trading_off_resource_budgets_f-Supplementary Material/code_and_data/experiments/base_results/bo_20220228_124924_b7rkpeqg/suggest_log/10ff0e28b9d35082a90f9ca434d56986.json
- trading_off_resource_budgets_f-Supplementary Material/code_and_data/experiments/base_results/bo_20220228_124924_b7rkpeqg/suggest_log/111b677eb9425c4492675a1b7314f89d.json
- trading_off_resource_budgets_f-Supplementary Material/code_and_data/experiments/base_results/bo_20220228_124924_b7rkpeqg/suggest_log/111bda0f558353c0b7f270fdc5979f77.json
- trading_off_resource_budgets_f-Supplementary Material/code_and_data/experiments/base_results/bo_20220228_124924_b7rkpeqg/suggest_log/1122df65aceb5dc4b6421859cfcdc28c.json
- trading_off_resource_budgets_f-Supplementary Material/code_and_data/experiments/base_results/bo_20220228_124924_b7rkpeqg/suggest_log/112e332b017d5b14b1afff7d2eac361e.json
- trading_off_resource_budgets_f-Supplementary Material/code_and_data/experiments/base_results/bo_20220228_124924_b7rkpeqg/suggest_log/1156c109c938569e83b46d4259e4d810.json
- trading_off_resource_budgets_f-Supplementary Material/code_and_data/experiments/base_results/bo_20220228_124924_b7rkpeqg/suggest_log/115d20bf90ff51ac9f2eeffb42273ef1.json
- trading_off_resource_budgets_f-Supplementary Material/code_and_data/experiments/base_results/bo_20220228_124924_b7rkpeqg/suggest_log/1167715410cf55d7b9d2c762deadb812.json
- trading_off_resource_budgets_f-Supplementary Material/code_and_data/experiments/base_results/bo_20220228_124924_b7rkpeqg/suggest_log/1171fe0df07e5024b62c0d038cbee49f.json
- trading_off_resource_budgets_f-Supplementary Material/code_and_data/experiments/base_results/bo_20220228_124924_b7rkpeqg/suggest_log/118c3a37a9e0563899e631444509d9ae.json
- trading_off_resource_budgets_f-Supplementary Material/code_and_data/experiments/base_results/bo_20220228_124924_b7rkpeqg/suggest_log/119e56617f695151bacf58d519be6c5a.json
- trading_off_resource_budgets_f-Supplementary Material/code_and_data/experiments/base_results/bo_20220228_124924_b7rkpeqg/suggest_log/11a2840f75df590d9456dd045c15375f.json
- trading_off_resource_budgets_f-Supplementary Material/code_and_data/experiments/base_results/bo_20220228_124924_b7rkpeqg/suggest_log/11a3bdbee5525cc596614d8a70da80bb.json
- trading_off_resource_budgets_f-Supplementary Material/code_and_data/experiments/base_results/bo_20220228_124924_b7rkpeqg/suggest_log/11c584b171025022b215759d5489d45b.json
- trading_off_resource_budgets_f-Supplementary Material/code_and_data/experiments/base_results/bo_20220228_124924_b7rkpeqg/suggest_log/11de7b9f555453b7893e414632f9881d.json
- trading_off_resource_budgets_f-Supplementary Material/code_and_data/experiments/base_results/bo_20220228_124924_b7rkpeqg/suggest_log/11f386aef2695e1c97e548131d0ff527.json
- trading_off_resource_budgets_f-Supplementary Material/code_and_data/experiments/base_results/bo_20220228_124924_b7rkpeqg/suggest_log/12163e57fa3c58ffba67a2030f1633d5.json
- trading_off_resource_budgets_f-Supplementary Material/code_and_data/experiments/base_results/bo_20220228_124924_b7rkpeqg/suggest_log/12167cb51efc5eda955e1af05e092fbc.json
- trading_off_resource_budgets_f-Supplementary Material/code_and_data/experiments/base_results/bo_20220228_124924_b7rkpeqg/suggest_log/124c98115f1d57dfaaf4f1d309917a9d.json
- trading_off_resource_budgets_f-Supplementary Material/code_and_data/experiments/base_results/bo_20220228_124924_b7rkpeqg/suggest_log/1253bdf3186853ba9d1f25658e7efed5.json
- trading_off_resource_budgets_f-Supplementary Material/code_and_data/experiments/base_results/bo_20220228_124924_b7rkpeqg/suggest_log/1255f17186f65f0399c925127f5c2e95.json
- trading_off_resource_budgets_f-Supplementary Material/code_and_data/experiments/base_results/bo_20220228_124924_b7rkpeqg/suggest_log/128155a1590c53ba85ae5ecb7abdf207.json
- trading_off_resource_budgets_f-Supplementary Material/code_and_data/experiments/base_results/bo_20220228_124924_b7rkpeqg/suggest_log/1282b19eb58d538db2ea435fc84da261.json
- trading_off_resource_budgets_f-Supplementary Material/code_and_data/experiments/base_results/bo_20220228_124924_b7rkpeqg/suggest_log/128b00fc34bb5738841abd36fe1a30ec.json
- trading_off_resource_budgets_f-Supplementary Material/code_and_data/experiments/base_results/bo_20220228_124924_b7rkpeqg/suggest_log/12a032df03645dbe8882f85803f8ce97.json
- trading_off_resource_budgets_f-Supplementary Material/code_and_data/experiments/base_results/bo_20220228_124924_b7rkpeqg/suggest_log/12a82305f75052338196676ca447db26.json
- trading_off_resource_budgets_f-Supplementary Material/code_and_data/experiments/base_results/bo_20220228_124924_b7rkpeqg/suggest_log/12b0c12cf520512dafc0a886001b6a7d.json
- trading_off_resource_budgets_f-Supplementary Material/code_and_data/experiments/base_results/bo_20220228_124924_b7rkpeqg/suggest_log/12b327cc5c8a54c998a444b9af73dc97.json
- trading_off_resource_budgets_f-Supplementary Material/code_and_data/experiments/base_results/bo_20220228_124924_b7rkpeqg/suggest_log/12b408eb469d59a8be3148483b955bda.json
- trading_off_resource_budgets_f-Supplementary Material/code_and_data/experiments/base_results/bo_20220228_124924_b7rkpeqg/suggest_log/12bea5da57325fccaab2088a3202e119.json
- trading_off_resource_budgets_f-Supplementary Material/code_and_data/experiments/base_results/bo_20220228_124924_b7rkpeqg/suggest_log/12cd4c47323b5106b8a69c74d721738c.json
- trading_off_resource_budgets_f-Supplementary Material/code_and_data/experiments/base_results/bo_20220228_124924_b7rkpeqg/suggest_log/12d862f535c45892b38e3756d2b95406.json
- trading_off_resource_budgets_f-Supplementary Material/code_and_data/experiments/base_results/bo_20220228_124924_b7rkpeqg/suggest_log/12e74ae9e6805d8ea485fa402c607ebe.json
- trading_off_resource_budgets_f-Supplementary Material/code_and_data/experiments/base_results/bo_20220228_124924_b7rkpeqg/suggest_log/12f00d2edc87527da013c71d9fcccfa4.json
- trading_off_resource_budgets_f-Supplementary Material/code_and_data/experiments/base_results/bo_20220228_124924_b7rkpeqg/suggest_log/130232cb4a6f5c80a925bc370bb87765.json
- trading_off_resource_budgets_f-Supplementary Material/code_and_data/experiments/base_results/bo_20220228_124924_b7rkpeqg/suggest_log/1303634767015bef87cbbb61cc5b1d0b.json
- trading_off_resource_budgets_f-Supplementary Material/code_and_data/experiments/base_results/bo_20220228_124924_b7rkpeqg/suggest_log/131a2e05e85c57f3972378eb3333d38a.json
- trading_off_resource_budgets_f-Supplementary Material/code_and_data/experiments/base_results/bo_20220228_124924_b7rkpeqg/suggest_log/13228ad5f4b45d428d65e59a85a62263.json
- trading_off_resource_budgets_f-Supplementary Material/code_and_data/experiments/base_results/bo_20220228_124924_b7rkpeqg/suggest_log/132ed8085592596ca128ecd6a9d173f2.json
- trading_off_resource_budgets_f-Supplementary Material/code_and_data/experiments/base_results/bo_20220228_124924_b7rkpeqg/suggest_log/13436facd25158328a304cc6260b1a3a.json
- trading_off_resource_budgets_f-Supplementary Material/code_and_data/experiments/base_results/bo_20220228_124924_b7rkpeqg/suggest_log/136f7045f2865073af6462b0205b54df.json
- trading_off_resource_budgets_f-Supplementary Material/code_and_data/experiments/base_results/bo_20220228_124924_b7rkpeqg/suggest_log/137719f6e63c56e29065877945a9eab3.json
- trading_off_resource_budgets_f-Supplementary Material/code_and_data/experiments/base_results/bo_20220228_124924_b7rkpeqg/suggest_log/13972d12107d566cb530e0839ed8f8ee.json
- trading_off_resource_budgets_f-Supplementary Material/code_and_data/experiments/base_results/bo_20220228_124924_b7rkpeqg/suggest_log/13973b3c59df53fa8a5fa85a38a277c3.json
- trading_off_resource_budgets_f-Supplementary Material/code_and_data/experiments/base_results/bo_20220228_124924_b7rkpeqg/suggest_log/13b840183f01572da38dd5e0b875003d.json
- trading_off_resource_budgets_f-Supplementary Material/code_and_data/experiments/base_results/bo_20220228_124924_b7rkpeqg/suggest_log/13e24f06a4a150609f25f4b2cd3781b8.json
- trading_off_resource_budgets_f-Supplementary Material/code_and_data/experiments/base_results/bo_20220228_124924_b7rkpeqg/suggest_log/1400f6ea707f5041a93eeed18e838c0e.json
- trading_off_resource_budgets_f-Supplementary Material/code_and_data/experiments/base_results/bo_20220228_124924_b7rkpeqg/suggest_log/140da6404c415921831f1f9681d31afb.json
- trading_off_resource_budgets_f-Supplementary Material/code_and_data/experiments/base_results/bo_20220228_124924_b7rkpeqg/suggest_log/14190ed5631455b393c701c810311b27.json
- trading_off_resource_budgets_f-Supplementary Material/code_and_data/experiments/base_results/bo_20220228_124924_b7rkpeqg/suggest_log/14247f7ba2df5bebaefb3de6a6f8fbb8.json
[truncated: 3,681 more entries]
