# Supplementary material
Source: ML conference proceedings conference paper supplement (https://proceedings.neurips.cc/paper_files/paper/2022/hash/31a57804448363bcab777f818f75f5b4-Abstract.html)
Supplement: Supplementary file 1 [file 31a57804448363bcab777f818f75f5b4-Supplemental-Conference.zip › trading_off_resource_budgets_f-Supplementary Material/code_and_data/experiments/base_results/bo_20220228_124924_b7rkpeqg/suggest_log/0a1c404acf085d0a8d306c48c97b9f7d.json]

{"meta": {"args": {"--uuid": "0a1c404acf085d0a8d306c48c97b9f7d", "-db-root": "/home/damon_falck/blackboxbandits/experiments/saved_results", "--opt-root": "/home/damon_falck/blackboxbandits/experiments", "--data-root": "/home/damon_falck/blackboxbandits/experiments/penn_datasets", "--db": "bo_20220228_124924_b7rkpeqg", "--opt": "OpenTuner-BanditA", "--data": "reg-557-analcatdata-apnea1", "--classifier": "MLP-adam", "--metric": "mse", "--calls": 20, "--suggestions": 1, "--jobs-file": null, "--verbose": false, "dry_run": false, "rev": "bd14afd", "opt_rev": "0.8.7"}, "signature": [[{"alpha": 0.019628224813442792, "batch_size": 182, "beta_1": 0.9410202200271762, "beta_2": 0.9998021557676793, "epsilon": 1.8662266976518e-08, "hidden_layer_sizes": 147, "learning_rate_init": 0.0005627932047415167, "tol": 0.03690557729213761, "validation_fraction": 0.8846827852548593}, {"alpha": 0.001998246739232944, "batch_size": 200, "beta_1": 0.919111482530466, "beta_2": 0.9998488260436156, "epsilon": 5.981221901152555e-07, "hidden_layer_sizes": 61, "learning_rate_init": 2.2310905607443014e-05, "tol": 1.2046852412030316e-05, "validation_fraction": 0.8117896445826539}, {"alpha": 0.46659545670218433, "batch_size": 219, "beta_1": 0.9889789783750891, "beta_2": 0.9999896868093284, "epsilon": 2.4234724484675948e-08, "hidden_layer_sizes": 167, "learning_rate_init": 2.972334644335654e-05, "tol": 0.0036281404040243792, "validation_fraction": 0.17260651658522078}, {"alpha": 4.656005689076002, "batch_size": 135, "beta_1": 0.870503881627747, "beta_2": 0.9948873266941017, "epsilon": 2.1023308743480125e-07, "hidden_layer_sizes": 118, "learning_rate_init": 0.001878173875716191, "tol": 1.1889379831773006e-05, "validation_fraction": 0.6264327093752792}, {"alpha": 0.04705159350400542, "batch_size": 158, "beta_1": 0.9870884262730957, "beta_2": 0.9999596874382349, "epsilon": 1.1981845126013875e-08, "hidden_layer_sizes": 116, "learning_rate_init": 0.006173405204074311, "tol": 1.7414134181586194e-05, "validation_fraction": 0.6754299026638921}], [23.4337908389275, 23.525031581837872, 24.012983940547322, 20.999229595045296, 22.35509902457064]]},
"data": {"coords": {"iter": {"dims": ["iter"], "attrs": {}, "data": [0, 1, 2, 3, 4, 5, 6, 7, 8, 9, 10, 11, 12, 13, 14, 15, 16, 17, 18, 19]}, "suggestion": {"dims": ["suggestion"], "attrs": {}, "data": [0]}}, "attrs": {}, "dims": {"iter": 20, "suggestion": 1}, "data_vars": {"alpha": {"dims": ["iter", "suggestion"], "attrs": {}, "data": [[1.298054724452864], [0.7199157845586482], [4.3478973215235985], [4.3478973215235985], [2.98659585297799], [4.3478973215235985], [9.221213932433749], [4.3478973215235985], [4.3478973215235985], [3.6689698752392563], [8.663082987503532], [1.1295591056350052], [1.7752902298930837], [4.850631645166229], [1.1295591056350052], [1.1295591056350052], [7.135341731791467], [1.1295591056350052], [1.1295591056350052], [3.9996403392689]]}, "batch_size": {"dims": ["iter", "suggestion"], "attrs": {}, "data": [[154], [154], [31], [31], [215], [31], [98], [31], [31], [212], [88], [31], [31], [31], [31], [89], [31], [31], [31], [46]]}, "beta_1": {"dims": ["iter", "suggestion"], "attrs": {}, "data": [[0.9471229210248238], [0.9471229210248238], [0.5868376295984727], [0.5868376295984727], [0.7477767067455401], [0.5868376295984727], [0.7409823539709454], [0.5868376295984727], [0.5868376295984727], [0.8102719959404145], [0.5014478306862584], [0.5868376295984727], [0.7469699741883167], [0.5868376295984727], [0.5868376295984727], [0.7024737732350301], [0.5868376295984727], [0.5868376295984727], [0.5868376295984727], [0.5427245919712883]]}, "beta_2": {"dims": ["iter", "suggestion"], "attrs": {}, "data": [[0.902043016346244], [0.902043016346244], [0.9953515154584807], [0.9953515154584807], [0.9149353561731217], [0.9953515154584807], [0.9581892846488128], [0.9953515154584807], [0.9309005017274625], [0.9749442465594925], [0.9438445365165097], [0.9953515154584807], [0.9953515154584807], [0.9953515154584807], [0.9953515154584807], [0.9953515154584807], [0.9953515154584807], [0.9953515154584807], [0.9953515154584807], [0.9874673254295812]]}, "epsilon": {"dims": ["iter", "suggestion"], "attrs": {}, "data": [[5.476795698350068e-07], [5.476795698350068e-07], [4.6492989516697016e-07], [4.6492989516697016e-07], [2.803030962067178e-07], [4.6492989516697016e-07], [1.8587973707514981e-07], [4.6492989516697016e-07], [4.6492989516697016e-07], [2.2925414291993695e-07], [6.383954759553157e-07], [2.4723230032716494e-07], [2.4723230032716494e-07], [2.4723230032716494e-07], [2.4723230032716494e-07], [2.4723230032716494e-07], [2.4723230032716494e-07], [2.4723230032716494e-07], [2.4723230032716494e-07], [5.779809929834224e-07]]}, "hidden_layer_sizes": {"dims": ["iter", "suggestion"], "attrs": {}, "data": [[161], [170], [160], [160], [184], [172], [123], [172], [172], [199], [75], [172], [172], [172], [120], [120], [120], [120], [120], [185]]}, "learning_rate_init": {"dims": ["iter", "suggestion"], "attrs": {}, "data": [[0.02043507659922199], [0.02043507659922199], [0.024840345413372256], [0.024840345413372256], [0.04493830962378003], [0.024840345413372256], [0.03410770408738489], [0.028412497708534646], [0.024840345413372256], [0.0765555563653854], [0.03817787568186309], [0.024840345413372256], [0.024840345413372256], [0.024840345413372256], [0.011971464767652918], [0.011971464767652918], [0.011971464767652918], [0.011971464767652918], [0.08225392812855163], [0.01695444711715004]]}, "tol": {"dims": ["iter", "suggestion"], "attrs": {}, "data": [[0.09633100127289322], [0.09204969315088689], [0.05441032989291566], [0.05441032989291566], [0.070609549428348], [0.05441032989291566], [0.03650252847052687], [0.012274868866302514], [0.05441032989291566], [0.03554896976808058], [0.06552640562796024], [0.05441032989291566], [0.05441032989291566], [0.05441032989291566], [0.05441032989291566], [0.05441032989291566], [0.020485541433698785], [0.08278918355035574], [0.05441032989291566], [0.04315514266578407]]}, "validation_fraction": {"dims": ["iter", "suggestion"], "attrs": {}, "data": [[0.6932171507008816], [0.6932171507008816], [0.3943503190815789], [0.40171941761283825], [0.50535372066183], [0.40171941761283825], [0.2770824334983564], [0.32655501472531423], [0.40171941761283825], [0.6688321405124983], [0.6763003234988849], [0.40171941761283825], [0.40171941761283825], [0.19569279064298517], [0.40171941761283825], [0.40171941761283825], [0.40171941761283825], [0.40171941761283825], [0.5536200730483384], [0.29230428373112927]]}}}}
