# Supplementary material
Source: ML conference proceedings conference paper supplement (https://proceedings.neurips.cc/paper_files/paper/2022/hash/31a57804448363bcab777f818f75f5b4-Abstract.html)
Supplement: Supplementary file 1 [file 31a57804448363bcab777f818f75f5b4-Supplemental-Conference.zip › trading_off_resource_budgets_f-Supplementary Material/code_and_data/experiments/base_results/bo_20220228_124924_b7rkpeqg/suggest_log/0a6a9487597f5f0c9566f75e17f41b69.json]

{"meta": {"args": {"--uuid": "0a6a9487597f5f0c9566f75e17f41b69", "-db-root": "/home/damon_falck/blackboxbandits/experiments/saved_results", "--opt-root": "/home/damon_falck/blackboxbandits/experiments", "--data-root": "/home/damon_falck/blackboxbandits/experiments/penn_datasets", "--db": "bo_20220228_124924_b7rkpeqg", "--opt": "HyperOpt", "--data": "clf-cmc", "--classifier": "MLP-adam", "--metric": "nll", "--calls": 20, "--suggestions": 1, "--jobs-file": null, "--verbose": false, "dry_run": false, "rev": "bd14afd", "opt_rev": "0.2.7"}, "signature": [[{"alpha": 0.019628224813442792, "batch_size": 182, "beta_1": 0.9410202200271762, "beta_2": 0.9998021557676793, "epsilon": 1.8662266976518e-08, "hidden_layer_sizes": 147, "learning_rate_init": 0.0005627932047415167, "tol": 0.03690557729213761, "validation_fraction": 0.8846827852548593}, {"alpha": 0.001998246739232944, "batch_size": 200, "beta_1": 0.919111482530466, "beta_2": 0.9998488260436156, "epsilon": 5.981221901152555e-07, "hidden_layer_sizes": 61, "learning_rate_init": 2.2310905607443014e-05, "tol": 1.2046852412030316e-05, "validation_fraction": 0.8117896445826539}, {"alpha": 0.46659545670218433, "batch_size": 219, "beta_1": 0.9889789783750891, "beta_2": 0.9999896868093284, "epsilon": 2.4234724484675948e-08, "hidden_layer_sizes": 167, "learning_rate_init": 2.972334644335654e-05, "tol": 0.0036281404040243792, "validation_fraction": 0.17260651658522078}, {"alpha": 4.656005689076002, "batch_size": 135, "beta_1": 0.870503881627747, "beta_2": 0.9948873266941017, "epsilon": 2.1023308743480125e-07, "hidden_layer_sizes": 118, "learning_rate_init": 0.001878173875716191, "tol": 1.1889379831773006e-05, "validation_fraction": 0.6264327093752792}, {"alpha": 0.04705159350400542, "batch_size": 158, "beta_1": 0.9870884262730957, "beta_2": 0.9999596874382349, "epsilon": 1.1981845126013875e-08, "hidden_layer_sizes": 116, "learning_rate_init": 0.006173405204074311, "tol": 1.7414134181586194e-05, "validation_fraction": 0.6754299026638921}], [1.1320832214129868, 1.3437866520033759, 1.1797882571218725, 0.984245381865486, 1.1059747295711824]]},
"data": {"coords": {"iter": {"dims": ["iter"], "attrs": {}, "data": [0, 1, 2, 3, 4, 5, 6, 7, 8, 9, 10, 11, 12, 13, 14, 15, 16, 17, 18, 19]}, "suggestion": {"dims": ["suggestion"], "attrs": {}, "data": [0]}}, "attrs": {}, "dims": {"iter": 20, "suggestion": 1}, "data_vars": {"alpha": {"dims": ["iter", "suggestion"], "attrs": {}, "data": [[0.9001764328304642], [0.07357635528071484], [2.1242132221212722e-05], [2.821164407552325e-05], [8.38418307612186e-05], [0.0001341048354819018], [0.010956952550614475], [3.054233158167662], [5.5191367622636496e-05], [0.26586028458238464], [3.219193401169343], [0.001961569320959952], [0.0007083637669578609], [0.001184930665763581], [2.4949762407417784], [0.5819028309565709], [0.000637631465535372], [0.037945814581678304], [0.00045323620391822436], [0.019021068535183226]]}, "batch_size": {"dims": ["iter", "suggestion"], "attrs": {}, "data": [[46], [28], [206], [132], [114], [164], [70], [172], [159], [13], [120], [232], [137], [152], [189], [154], [135], [191], [46], [158]]}, "beta_1": {"dims": ["iter", "suggestion"], "attrs": {}, "data": [[0.8557585880886763], [0.9515658616601459], [0.7815271833271097], [0.9046599032353572], [0.582230463723143], [0.733737887212999], [0.7236637730717015], [0.5742815839846307], [0.6974478011990776], [0.540613936708901], [0.9173731707088362], [0.70007237270912], [0.63912865694988], [0.5450954539407472], [0.6652887459639285], [0.5628802300272284], [0.5175118054252807], [0.5946917770737832], [0.7431638881176401], [0.558266588812788]]}, "beta_2": {"dims": ["iter", "suggestion"], "attrs": {}, "data": [[0.9781581031263159], [0.9020193434219329], [0.9960654781326674], [0.911820522068203], [0.937863043435725], [0.9883608885955311], [0.9749297374662471], [0.9816116437462248], [0.9987843601651624], [0.9207418962310527], [0.9116183093182282], [0.9610490404401368], [0.9423261537436293], [0.9437764886128036], [0.9314651396995598], [0.9889158938413372], [0.919077694404943], [0.9701817135345997], [0.9254511811866286], [0.9977237775687343]]}, "epsilon": {"dims": ["iter", "suggestion"], "attrs": {}, "data": [[2.2210962937287382e-09], [1.6344635121579477e-08], [8.69395737433597e-08], [6.277759101914327e-07], [2.2657816717798144e-08], [1.2469441451417717e-07], [2.4191084355452756e-08], [1.5764079641122628e-09], [7.042485719793788e-08], [1.8797093509925147e-09], [1.0981590094477216e-07], [9.565744869527144e-09], [2.1890509717152826e-09], [4.041771262146913e-09], [4.774726182678544e-09], [9.073793171988726e-07], [2.901660540929757e-07], [1.6414144006582565e-08], [2.3059942470227238e-09], [1.5445564201753624e-07]]}, "hidden_layer_sizes": {"dims": ["iter", "suggestion"], "attrs": {}, "data": [[179], [97], [173], [133], [116], [74], [81], [187], [63], [111], [177], [98], [137], [115], [168], [55], [85], [109], [170], [151]]}, "learning_rate_init": {"dims": ["iter", "suggestion"], "attrs": {}, "data": [[8.01365598945017e-05], [0.002785947757028804], [0.0017330605494396477], [0.00033876627237900434], [3.157068448611792e-05], [0.00022234795551644273], [0.000343761955160124], [5.264551667272496e-05], [0.001449051466069489], [0.0019775158208430936], [2.708053471569911e-05], [0.0038383806071441077], [0.0042070100818381384], [2.257160430353123e-05], [0.011323609517804908], [0.016549112788836418], [0.00014789391953047256], [0.00022915733826773632], [0.002711910429619355], [9.113147399314155e-05]]}, "tol": {"dims": ["iter", "suggestion"], "attrs": {}, "data": [[0.002782092674186675], [0.0008793746080254949], [3.0573533642674585e-05], [1.5040737950649134e-05], [0.006561887802060065], [3.781808019244776e-05], [0.0036352976704490695], [1.885945715176202e-05], [0.03642213087556344], [0.014364985116537315], [0.002700123724029586], [0.0005600647173208511], [0.0009276566131756743], [0.00018445064396210202], [4.4588902249947776e-05], [3.609026344559929e-05], [4.2328614059399756e-05], [0.007381352434889101], [0.06082290651058671], [0.01398139854173703]]}, "validation_fraction": {"dims": ["iter", "suggestion"], "attrs": {}, "data": [[0.1340758696588359], [0.27966813217767894], [0.32432100961677296], [0.5364439072944819], [0.12419588233787646], [0.11977319525781897], [0.12041108793871846], [0.41020205043741503], [0.15543910734166008], [0.15419349300190832], [0.7616983033115887], [0.12760156255147437], [0.126903523171928], [0.13870371503921627], [0.6545813108867932], [0.5638608493702976], [0.5980391413747819], [0.2395652919097973], [0.5460845726130243], [0.5910254838648158]]}}}}
