# Supplementary material
Source: ML conference proceedings conference paper supplement (https://proceedings.neurips.cc/paper_files/paper/2022/hash/31a57804448363bcab777f818f75f5b4-Abstract.html)
Supplement: Supplementary file 1 [file 31a57804448363bcab777f818f75f5b4-Supplemental-Conference.zip › trading_off_resource_budgets_f-Supplementary Material/code_and_data/experiments/base_results/bo_20220228_124924_b7rkpeqg/suggest_log/0a8d571e5e09589b95929a41ecfc2634.json]

{"meta": {"args": {"--uuid": "0a8d571e5e09589b95929a41ecfc2634", "-db-root": "/home/damon_falck/blackboxbandits/experiments/saved_results", "--opt-root": "/home/damon_falck/blackboxbandits/experiments", "--data-root": "/home/damon_falck/blackboxbandits/experiments/penn_datasets", "--db": "bo_20220228_124924_b7rkpeqg", "--opt": "Scikit-GP-Hedge", "--data": "reg-634-fri-c2-100-10", "--classifier": "lasso", "--metric": "mse", "--calls": 20, "--suggestions": 1, "--jobs-file": null, "--verbose": false, "dry_run": false, "rev": "bd14afd", "opt_rev": "0.9.0"}, "signature": [[{"alpha": 1.5676677195506077, "fit_intercept": true, "max_iter": 423, "normalize": true, "positive": false, "tol": 0.0038333321561566623}, {"alpha": 0.5627932047415171, "fit_intercept": true, "max_iter": 3989, "normalize": false, "positive": true, "tol": 0.001304907355036239}, {"alpha": 1.871450068624068, "fit_intercept": true, "max_iter": 16, "normalize": false, "positive": false, "tol": 0.021403233140986057}, {"alpha": 12.960656597279737, "fit_intercept": true, "max_iter": 4378, "normalize": true, "positive": false, "tol": 0.013246974647468445}, {"alpha": 0.029723346443356558, "fit_intercept": true, "max_iter": 24, "normalize": true, "positive": true, "tol": 0.00045566719139214756}], [0.9203545937369053, 0.9203545937369053, 0.9203545937369053, 0.9203545937369053, 0.9411217610166958]]},
"data": {"coords": {"iter": {"dims": ["iter"], "attrs": {}, "data": [0, 1, 2, 3, 4, 5, 6, 7, 8, 9, 10, 11, 12, 13, 14, 15, 16, 17, 18, 19]}, "suggestion": {"dims": ["suggestion"], "attrs": {}, "data": [0]}}, "attrs": {}, "dims": {"iter": 20, "suggestion": 1}, "data_vars": {"alpha": {"dims": ["iter", "suggestion"], "attrs": {}, "data": [[0.4696549388176442], [2.229886100332631], [6.733061420310713], [0.012407841037058462], [12.083868562189235], [29.208711304420337], [1.6374364329699862], [0.01], [100.0], [0.019983722384289006], [100.0], [0.01], [0.027336319186705572], [0.01], [0.01], [0.010160029484213793], [2.2160986923145494], [0.010094423640507737], [0.06449352681090363], [0.01]]}, "fit_intercept": {"dims": ["iter", "suggestion"], "attrs": {}, "data": [[0], [1], [0], [0], [0], [1], [1], [1], [1], [0], [1], [1], [1], [0], [1], [1], [1], [1], [0], [1]]}, "max_iter": {"dims": ["iter", "suggestion"], "attrs": {}, "data": [[3010], [1590], [4554], [1409], [1222], [1392], [444], [5000], [5000], [10], [5000], [10], [5000], [2213], [10], [2942], [659], [1085], [1023], [5000]]}, "normalize": {"dims": ["iter", "suggestion"], "attrs": {}, "data": [[0], [0], [1], [0], [0], [0], [1], [0], [1], [1], [1], [1], [1], [0], [0], [1], [1], [1], [0], [0]]}, "positive": {"dims": ["iter", "suggestion"], "attrs": {}, "data": [[1], [0], [0], [1], [1], [0], [0], [0], [1], [1], [0], [1], [0], [0], [0], [0], [1], [0], [0], [0]]}, "tol": {"dims": ["iter", "suggestion"], "attrs": {}, "data": [[2.3372809373534847e-05], [0.008653362255714626], [0.02172661810751343], [0.00014579732178263003], [0.0009081669855148479], [2.3463639694606204e-05], [0.0004816729914557918], [0.1], [1e-05], [0.1], [0.008673212600281057], [1e-05], [1e-05], [1.628927143840929e-05], [1e-05], [1.039316590504475e-05], [0.06305765835582108], [0.09853568915333681], [1.719628171576389e-05], [1e-05]]}}}}
