# Supplementary material
Source: ML conference proceedings conference paper supplement (https://proceedings.neurips.cc/paper_files/paper/2022/hash/31a57804448363bcab777f818f75f5b4-Abstract.html)
Supplement: Supplementary file 1 [file 31a57804448363bcab777f818f75f5b4-Supplemental-Conference.zip › trading_off_resource_budgets_f-Supplementary Material/code_and_data/experiments/base_results/bo_20220228_124924_b7rkpeqg/suggest_log/0a44c4c414ab5b869bbb97f4b327b94a.json]

{"meta": {"args": {"--uuid": "0a44c4c414ab5b869bbb97f4b327b94a", "-db-root": "/home/damon_falck/blackboxbandits/experiments/saved_results", "--opt-root": "/home/damon_falck/blackboxbandits/experiments", "--data-root": "/home/damon_falck/blackboxbandits/experiments/penn_datasets", "--db": "bo_20220228_124924_b7rkpeqg", "--opt": "RandomSearch", "--data": "reg-201-pol", "--classifier": "MLP-adam", "--metric": "mse", "--calls": 20, "--suggestions": 1, "--jobs-file": null, "--verbose": false, "dry_run": false, "rev": "bd14afd", "opt_rev": "0.0.8"}, "signature": [[{"alpha": 0.019628224813442792, "batch_size": 182, "beta_1": 0.9410202200271762, "beta_2": 0.9998021557676793, "epsilon": 1.8662266976518e-08, "hidden_layer_sizes": 147, "learning_rate_init": 0.0005627932047415167, "tol": 0.03690557729213761, "validation_fraction": 0.8846827852548593}, {"alpha": 0.001998246739232944, "batch_size": 200, "beta_1": 0.919111482530466, "beta_2": 0.9998488260436156, "epsilon": 5.981221901152555e-07, "hidden_layer_sizes": 61, "learning_rate_init": 2.2310905607443014e-05, "tol": 1.2046852412030316e-05, "validation_fraction": 0.8117896445826539}, {"alpha": 0.46659545670218433, "batch_size": 219, "beta_1": 0.9889789783750891, "beta_2": 0.9999896868093284, "epsilon": 2.4234724484675948e-08, "hidden_layer_sizes": 167, "learning_rate_init": 2.972334644335654e-05, "tol": 0.0036281404040243792, "validation_fraction": 0.17260651658522078}, {"alpha": 4.656005689076002, "batch_size": 135, "beta_1": 0.870503881627747, "beta_2": 0.9948873266941017, "epsilon": 2.1023308743480125e-07, "hidden_layer_sizes": 118, "learning_rate_init": 0.001878173875716191, "tol": 1.1889379831773006e-05, "validation_fraction": 0.6264327093752792}, {"alpha": 0.04705159350400542, "batch_size": 158, "beta_1": 0.9870884262730957, "beta_2": 0.9999596874382349, "epsilon": 1.1981845126013875e-08, "hidden_layer_sizes": 116, "learning_rate_init": 0.006173405204074311, "tol": 1.7414134181586194e-05, "validation_fraction": 0.6754299026638921}], [1.0848121036343195, 2.6276587745415756, 0.7113736597900766, 0.27636274613180595, 0.12127873133497954]]},
"data": {"coords": {"iter": {"dims": ["iter"], "attrs": {}, "data": [0, 1, 2, 3, 4, 5, 6, 7, 8, 9, 10, 11, 12, 13, 14, 15, 16, 17, 18, 19]}, "suggestion": {"dims": ["suggestion"], "attrs": {}, "data": [0]}}, "attrs": {}, "dims": {"iter": 20, "suggestion": 1}, "data_vars": {"alpha": {"dims": ["iter", "suggestion"], "attrs": {}, "data": [[5.532383411263462e-05], [0.0025436573803743518], [0.0021842166839255743], [1.4310325280156314e-05], [0.17320217850601843], [0.00016968573306220261], [4.9706258657935445], [4.6724815904811915e-05], [3.295611519097073], [1.975750294958651e-05], [0.0026482652667999497], [0.8660973179377014], [0.4236808103391366], [8.482425831649465e-05], [0.7388034135166818], [9.798405777605069], [0.027357274747925486], [0.12658301019541401], [0.00014639325343946048], [0.0011095047763333345]]}, "batch_size": {"dims": ["iter", "suggestion"], "attrs": {}, "data": [[235], [96], [52], [65], [18], [145], [67], [36], [68], [14], [70], [65], [222], [11], [202], [140], [101], [73], [120], [203]]}, "beta_1": {"dims": ["iter", "suggestion"], "attrs": {}, "data": [[0.9598344275857582], [0.9854543922234293], [0.74372146737169], [0.9831281766156885], [0.7119225959733534], [0.7585750827782516], [0.6254552643572898], [0.9865287299975094], [0.6910930394289515], [0.8668260039745114], [0.7503041928042349], [0.6619332993579262], [0.9387153010392987], [0.8577445093705384], [0.896988097609529], [0.9550099905665169], [0.8736457268118438], [0.9472258790661637], [0.6017828075094191], [0.985910036409612]]}, "beta_2": {"dims": ["iter", "suggestion"], "attrs": {}, "data": [[0.9600234559091378], [0.9999946815625188], [0.9829229636529841], [0.9999962347377328], [0.9654115654504392], [0.9999964039573147], [0.9999262609711784], [0.9995747163033714], [0.9998882599956966], [0.9314985535741128], [0.9850397656175961], [0.9998047750229944], [0.9999988093258911], [0.99985655299061], [0.9961890369237757], [0.9380717686494789], [0.9996382892196988], [0.926106107467104], [0.9999676086720851], [0.9995471824086193]]}, "epsilon": {"dims": ["iter", "suggestion"], "attrs": {}, "data": [[4.333012869542897e-07], [1.6622573251863203e-07], [8.844908313705901e-09], [2.7886763240692617e-09], [3.7021777341882244e-07], [1.9183585792491293e-08], [5.898293040455664e-07], [1.0881854239059169e-09], [2.665171941474822e-09], [2.898227499641273e-09], [4.398143333782602e-07], [5.615604723738659e-07], [1.2726711055425855e-07], [3.4946767831924423e-09], [1.5454915646200018e-09], [4.880959400926503e-07], [9.614612618937254e-09], [1.2148165996074536e-07], [2.5203743923169097e-09], [1.6977112155285933e-09]]}, "hidden_layer_sizes": {"dims": ["iter", "suggestion"], "attrs": {}, "data": [[104], [150], [170], [178], [108], [57], [126], [138], [197], [198], [166], [163], [139], [116], [128], [138], [160], [174], [187], [170]]}, "learning_rate_init": {"dims": ["iter", "suggestion"], "attrs": {}, "data": [[6.144236314016678e-05], [0.009831515389550304], [0.0005997506372391384], [0.02116573964465442], [6.329471640237367e-05], [0.08940885972093505], [6.110244328067585e-05], [0.001626609275305125], [0.06619574960200876], [0.07766090780417499], [0.0004764739709648118], [1.2321677878256772e-05], [0.00740116420702037], [0.0006815499202243964], [0.003353522981126603], [0.005168807242135059], [2.1761906431187857e-05], [0.00010538764572660616], [0.012993164863770636], [0.007143921977806863]]}, "tol": {"dims": ["iter", "suggestion"], "attrs": {}, "data": [[0.0021062382115034782], [1.789978687311021e-05], [6.367497422451645e-05], [0.00013326281123029077], [0.011336416884701911], [0.001675342825593003], [6.213009137408164e-05], [1.5071710734081967e-05], [0.00014022391614900738], [0.0014209782016421971], [0.00012437407427201233], [0.0021997267766697384], [2.4473546484918154e-05], [0.029423156475137623], [0.030851589976590467], [0.0010762558774538768], [1.4199144160357878e-05], [0.009526711324368458], [0.0013509785396716664], [0.04104771517528824]]}, "validation_fraction": {"dims": ["iter", "suggestion"], "attrs": {}, "data": [[0.6604021134917761], [0.12961525036834956], [0.37598684570550295], [0.26584594999608574], [0.3572610872321289], [0.14227342701848492], [0.13643769111476203], [0.7322137865067139], [0.38755037422950467], [0.6227706860426377], [0.5972704338731007], [0.4169884850311094], [0.6905882127124564], [0.683548460253129], [0.11930574843802214], [0.8908218685640954], [0.2290060332450666], [0.7724301108653421], [0.13083719034985142], [0.12366720833385987]]}}}}
