# Supplementary material
Source: ML conference proceedings conference paper supplement (https://proceedings.neurips.cc/paper_files/paper/2022/hash/31a57804448363bcab777f818f75f5b4-Abstract.html)
Supplement: Supplementary file 1 [file 31a57804448363bcab777f818f75f5b4-Supplemental-Conference.zip › trading_off_resource_budgets_f-Supplementary Material/code_and_data/experiments/base_results/bo_20220228_124924_b7rkpeqg/suggest_log/0a047b5d5a5a5ca89fcda8e76ac324cc.json]

{"meta": {"args": {"--uuid": "0a047b5d5a5a5ca89fcda8e76ac324cc", "-db-root": "/home/damon_falck/blackboxbandits/experiments/saved_results", "--opt-root": "/home/damon_falck/blackboxbandits/experiments", "--data-root": "/home/damon_falck/blackboxbandits/experiments/penn_datasets", "--db": "bo_20220228_124924_b7rkpeqg", "--opt": "HyperOpt", "--data": "clf-Hill-Valley-without-noise", "--classifier": "lasso", "--metric": "nll", "--calls": 20, "--suggestions": 1, "--jobs-file": null, "--verbose": false, "dry_run": false, "rev": "bd14afd", "opt_rev": "0.2.7"}, "signature": [[{"C": 1.5676677195506077, "intercept_scaling": 7.257005721594282}, {"C": 2.57663857461359, "intercept_scaling": 1.5119336467641016}, {"C": 0.49501595537331966, "intercept_scaling": 3.833332156156665}, {"C": 0.5627932047415171, "intercept_scaling": 36.905577292137636}, {"C": 71.55682161754872, "intercept_scaling": 0.34179529120610125}], [0.5697207657736787, 0.5412843856428483, 0.6431531392479826, 0.6347145346931283, 0.3399812974394701]]},
"data": {"coords": {"iter": {"dims": ["iter"], "attrs": {}, "data": [0, 1, 2, 3, 4, 5, 6, 7, 8, 9, 10, 11, 12, 13, 14, 15, 16, 17, 18, 19]}, "suggestion": {"dims": ["suggestion"], "attrs": {}, "data": [0]}}, "attrs": {}, "dims": {"iter": 20, "suggestion": 1}, "data_vars": {"C": {"dims": ["iter", "suggestion"], "attrs": {}, "data": [[66.52728873087277], [7.555468852349752], [31.739408065702605], [0.03993227300764069], [1.8871820848068628], [0.0744153129232497], [39.299993986535846], [70.06243393080827], [14.502196750283824], [0.020562602480529223], [0.6594103557197973], [0.044236182952203766], [0.7159144483946472], [0.011396816711571367], [0.022631435388341916], [1.6458334730328408], [0.03124715002250724], [0.06531784294881003], [38.17831741713543], [1.1477275401028275]]}, "intercept_scaling": {"dims": ["iter", "suggestion"], "attrs": {}, "data": [[1.3757898472229217], [0.01118355078319196], [1.1403677851869307], [1.4290575237488836], [66.8590050523202], [25.26086969166686], [3.89590883751273], [0.24085576965241937], [0.020964550568736598], [0.036212471829901095], [0.06342028874573391], [87.52578573603506], [0.09158786756366158], [0.4979815888021277], [0.21774510563811122], [1.3275983256943857], [0.07591695571223746], [0.6264214025206902], [15.892102279535154], [0.047620740224638705]]}}}}
