# Supplementary material
Source: ML conference proceedings conference paper supplement (https://proceedings.neurips.cc/paper_files/paper/2022/hash/31a57804448363bcab777f818f75f5b4-Abstract.html)
Supplement: Supplementary file 1 [file 31a57804448363bcab777f818f75f5b4-Supplemental-Conference.zip › trading_off_resource_budgets_f-Supplementary Material/code_and_data/experiments/base_results/bo_20220228_124924_b7rkpeqg/suggest_log/0a56e1b144af55c5acc106c9698d0b30.json]

{"meta": {"args": {"--uuid": "0a56e1b144af55c5acc106c9698d0b30", "-db-root": "/home/damon_falck/blackboxbandits/experiments/saved_results", "--opt-root": "/home/damon_falck/blackboxbandits/experiments", "--data-root": "/home/damon_falck/blackboxbandits/experiments/penn_datasets", "--db": "bo_20220228_124924_b7rkpeqg", "--opt": "Scikit-GP-Hedge", "--data": "clf-credit-g", "--classifier": "lasso", "--metric": "nll", "--calls": 20, "--suggestions": 1, "--jobs-file": null, "--verbose": false, "dry_run": false, "rev": "bd14afd", "opt_rev": "0.9.0"}, "signature": [[{"C": 1.5676677195506077, "intercept_scaling": 7.257005721594282}, {"C": 2.57663857461359, "intercept_scaling": 1.5119336467641016}, {"C": 0.49501595537331966, "intercept_scaling": 3.833332156156665}, {"C": 0.5627932047415171, "intercept_scaling": 36.905577292137636}, {"C": 71.55682161754872, "intercept_scaling": 0.34179529120610125}], [0.49275894208244475, 0.49594583444558016, 0.48393844216163406, 0.48461478046783146, 0.5053767889412064]]},
"data": {"coords": {"iter": {"dims": ["iter"], "attrs": {}, "data": [0, 1, 2, 3, 4, 5, 6, 7, 8, 9, 10, 11, 12, 13, 14, 15, 16, 17, 18, 19]}, "suggestion": {"dims": ["suggestion"], "attrs": {}, "data": [0]}}, "attrs": {}, "dims": {"iter": 20, "suggestion": 1}, "data_vars": {"C": {"dims": ["iter", "suggestion"], "attrs": {}, "data": [[0.6213973166071661], [0.884492792240727], [0.49577200638107166], [8.841180977255897], [0.6175461510444067], [0.011762139921532697], [100.0], [0.16431600224582968], [32.119003631079096], [0.2509177218956773], [0.06022500240097174], [0.23478192427083144], [2.9241312190654223], [0.2539436565826029], [0.23551483612698748], [70.9571634717628], [18.89035145325844], [0.03219808493499301], [4.979803046370398], [0.07572835351452818]]}, "intercept_scaling": {"dims": ["iter", "suggestion"], "attrs": {}, "data": [[0.07039733170241536], [5.360863689321771], [13.682509866238835], [25.672304423199627], [66.08270907019406], [100.0], [100.0], [100.0], [90.32445934596184], [100.0], [0.013578396628385574], [0.01], [90.65091087064064], [100.0], [0.011412290689118457], [0.010684450436483956], [0.011435034626494747], [96.9272326819989], [0.01000107434770431], [14.727702371389567]]}}}}
