# Supplementary material
Source: ML conference proceedings conference paper supplement (https://proceedings.neurips.cc/paper_files/paper/2022/hash/31a57804448363bcab777f818f75f5b4-Abstract.html)
Supplement: Supplementary file 1 [file 31a57804448363bcab777f818f75f5b4-Supplemental-Conference.zip › trading_off_resource_budgets_f-Supplementary Material/code_and_data/experiments/base_results/bo_20220228_124924_b7rkpeqg/suggest_log/0a70d37d70d35ec9afd5cc5a46fedfb6.json]

{"meta": {"args": {"--uuid": "0a70d37d70d35ec9afd5cc5a46fedfb6", "-db-root": "/home/damon_falck/blackboxbandits/experiments/saved_results", "--opt-root": "/home/damon_falck/blackboxbandits/experiments", "--data-root": "/home/damon_falck/blackboxbandits/experiments/penn_datasets", "--db": "bo_20220228_124924_b7rkpeqg", "--opt": "RandomSearch", "--data": "clf-xd6", "--classifier": "MLP-adam", "--metric": "nll", "--calls": 20, "--suggestions": 1, "--jobs-file": null, "--verbose": false, "dry_run": false, "rev": "bd14afd", "opt_rev": "0.0.8"}, "signature": [[{"alpha": 0.019628224813442792, "batch_size": 182, "beta_1": 0.9410202200271762, "beta_2": 0.9998021557676793, "epsilon": 1.8662266976518e-08, "hidden_layer_sizes": 147, "learning_rate_init": 0.0005627932047415167, "tol": 0.03690557729213761, "validation_fraction": 0.8846827852548593}, {"alpha": 0.001998246739232944, "batch_size": 200, "beta_1": 0.919111482530466, "beta_2": 0.9998488260436156, "epsilon": 5.981221901152555e-07, "hidden_layer_sizes": 61, "learning_rate_init": 2.2310905607443014e-05, "tol": 1.2046852412030316e-05, "validation_fraction": 0.8117896445826539}, {"alpha": 0.46659545670218433, "batch_size": 219, "beta_1": 0.9889789783750891, "beta_2": 0.9999896868093284, "epsilon": 2.4234724484675948e-08, "hidden_layer_sizes": 167, "learning_rate_init": 2.972334644335654e-05, "tol": 0.0036281404040243792, "validation_fraction": 0.17260651658522078}, {"alpha": 4.656005689076002, "batch_size": 135, "beta_1": 0.870503881627747, "beta_2": 0.9948873266941017, "epsilon": 2.1023308743480125e-07, "hidden_layer_sizes": 118, "learning_rate_init": 0.001878173875716191, "tol": 1.1889379831773006e-05, "validation_fraction": 0.6264327093752792}, {"alpha": 0.04705159350400542, "batch_size": 158, "beta_1": 0.9870884262730957, "beta_2": 0.9999596874382349, "epsilon": 1.1981845126013875e-08, "hidden_layer_sizes": 116, "learning_rate_init": 0.006173405204074311, "tol": 1.7414134181586194e-05, "validation_fraction": 0.6754299026638921}], [0.6185220405581469, 0.7518313385027879, 0.6520621211227544, 0.2752534948821842, 0.21683807726957727]]},
"data": {"coords": {"iter": {"dims": ["iter"], "attrs": {}, "data": [0, 1, 2, 3, 4, 5, 6, 7, 8, 9, 10, 11, 12, 13, 14, 15, 16, 17, 18, 19]}, "suggestion": {"dims": ["suggestion"], "attrs": {}, "data": [0]}}, "attrs": {}, "dims": {"iter": 20, "suggestion": 1}, "data_vars": {"alpha": {"dims": ["iter", "suggestion"], "attrs": {}, "data": [[0.026419327434033812], [0.0007459603005113991], [0.0011534115668080135], [0.12908783248229705], [3.4400739359531753], [1.521686224302899], [2.2991158005162174e-05], [2.4974803441074873], [8.425033132570908], [0.000711225286883363], [4.412020049080237e-05], [0.0051803116062132965], [7.097637719350417e-05], [0.01585414769095155], [0.017298131963261833], [0.0008762973501858792], [2.0390587606280826], [1.4750394486524263e-05], [0.0014658875381688128], [0.0029009097541018124]]}, "batch_size": {"dims": ["iter", "suggestion"], "attrs": {}, "data": [[139], [113], [150], [86], [64], [14], [57], [221], [19], [48], [231], [156], [142], [43], [94], [81], [111], [88], [185], [158]]}, "beta_1": {"dims": ["iter", "suggestion"], "attrs": {}, "data": [[0.6564604499001763], [0.9500932424458503], [0.986865362986016], [0.9532010548065878], [0.8678864220150453], [0.9391304014617219], [0.9827286663131712], [0.9823358928991305], [0.9291950586188524], [0.9891829684737905], [0.9766035054259219], [0.937612462817614], [0.8994439428481107], [0.5211800947009757], [0.9721883638509112], [0.9894938945285113], [0.8703579353665175], [0.9846805410462408], [0.96412473026047], [0.958265039629274]]}, "beta_2": {"dims": ["iter", "suggestion"], "attrs": {}, "data": [[0.9642134338726993], [0.9448203783190287], [0.9999423271956168], [0.9998759768983077], [0.9999692068786912], [0.9636689965192574], [0.991783680955361], [0.9809851744408723], [0.9996089021456395], [0.9860810087969097], [0.9999683979618595], [0.9684275696906842], [0.9985765059403383], [0.9999803375158355], [0.9999988712304617], [0.9999967030511362], [0.9945862125203077], [0.9999421964751716], [0.997961716463307], [0.9931265878596128]]}, "epsilon": {"dims": ["iter", "suggestion"], "attrs": {}, "data": [[9.852306463814398e-09], [3.652374967036347e-08], [2.7419537582387884e-07], [7.989566215354808e-09], [1.984276729555891e-09], [1.1713147250551652e-08], [6.643399681544196e-08], [2.136579035346618e-09], [2.6487046534289225e-08], [2.8755501869403547e-08], [1.8768444028561933e-08], [1.1798843804340594e-09], [1.3396570037319702e-07], [7.155032950545906e-09], [1.6892236367680213e-08], [2.0898346446471952e-07], [8.353728107669752e-07], [4.768106454642284e-09], [1.455859764825294e-08], [2.1490943429914437e-07]]}, "hidden_layer_sizes": {"dims": ["iter", "suggestion"], "attrs": {}, "data": [[98], [123], [171], [197], [111], [113], [68], [164], [134], [98], [186], [53], [145], [177], [86], [166], [168], [85], [96], [175]]}, "learning_rate_init": {"dims": ["iter", "suggestion"], "attrs": {}, "data": [[0.0004890626124943371], [0.0063745986845760065], [0.0003018841294128722], [3.213883647927368e-05], [0.012445435582385068], [0.0001076483389977625], [3.400040398078132e-05], [4.909720664094212e-05], [0.0010939502906227912], [0.010567468622401472], [0.00031906094997246557], [0.0003206605627449822], [0.003677859062400323], [0.0007458594975096216], [3.8534728518046725e-05], [0.021829252540703285], [0.07350842444911145], [0.00013616060022098676], [6.142899878937783e-05], [3.8936507134160595e-05]]}, "tol": {"dims": ["iter", "suggestion"], "attrs": {}, "data": [[1.0446002779150255e-05], [1.2263306702381104e-05], [0.0024355983429832475], [1.4521699308270007e-05], [0.004268350468552444], [2.6844507420379795e-05], [0.00016944243888346712], [0.0001805104298721265], [0.012906422851562058], [0.00039876387318517055], [0.00316337937714317], [1.0739963497623762e-05], [0.0001177405579976009], [1.625175409802982e-05], [0.016745663142642586], [0.001805112743147095], [0.001140947185257356], [0.00018968486664377735], [4.758304395038968e-05], [6.9430531303398e-05]]}, "validation_fraction": {"dims": ["iter", "suggestion"], "attrs": {}, "data": [[0.3646985672945854], [0.33948456895548107], [0.6073754588644438], [0.4191551564114123], [0.8376650613029955], [0.741135009932009], [0.6378743281098517], [0.43260803070119896], [0.7004361569932214], [0.3644617780412002], [0.851095094368928], [0.46115965945460574], [0.6853045959103681], [0.6522750397254247], [0.790943361634406], [0.7447924819558231], [0.8570045686000594], [0.21636496001822195], [0.3212530039107465], [0.6897587351736125]]}}}}
