# Supplementary material
Source: ML conference proceedings conference paper supplement (https://proceedings.neurips.cc/paper_files/paper/2022/hash/31a57804448363bcab777f818f75f5b4-Abstract.html)
Supplement: Supplementary file 1 [file 31a57804448363bcab777f818f75f5b4-Supplemental-Conference.zip › trading_off_resource_budgets_f-Supplementary Material/code_and_data/experiments/base_results/bo_20220228_124924_b7rkpeqg/suggest_log/0a2151eba2e6576f91c5d4f350955328.json]

{"meta": {"args": {"--uuid": "0a2151eba2e6576f91c5d4f350955328", "-db-root": "/home/damon_falck/blackboxbandits/experiments/saved_results", "--opt-root": "/home/damon_falck/blackboxbandits/experiments", "--data-root": "/home/damon_falck/blackboxbandits/experiments/penn_datasets", "--db": "bo_20220228_124924_b7rkpeqg", "--opt": "Scikit-GBRT-Hedge", "--data": "reg-591-fri-c1-100-10", "--classifier": "MLP-adam", "--metric": "mse", "--calls": 20, "--suggestions": 1, "--jobs-file": null, "--verbose": false, "dry_run": false, "rev": "bd14afd", "opt_rev": "0.9.0"}, "signature": [[{"alpha": 0.019628224813442792, "batch_size": 182, "beta_1": 0.9410202200271762, "beta_2": 0.9998021557676793, "epsilon": 1.8662266976518e-08, "hidden_layer_sizes": 147, "learning_rate_init": 0.0005627932047415167, "tol": 0.03690557729213761, "validation_fraction": 0.8846827852548593}, {"alpha": 0.001998246739232944, "batch_size": 200, "beta_1": 0.919111482530466, "beta_2": 0.9998488260436156, "epsilon": 5.981221901152555e-07, "hidden_layer_sizes": 61, "learning_rate_init": 2.2310905607443014e-05, "tol": 1.2046852412030316e-05, "validation_fraction": 0.8117896445826539}, {"alpha": 0.46659545670218433, "batch_size": 219, "beta_1": 0.9889789783750891, "beta_2": 0.9999896868093284, "epsilon": 2.4234724484675948e-08, "hidden_layer_sizes": 167, "learning_rate_init": 2.972334644335654e-05, "tol": 0.0036281404040243792, "validation_fraction": 0.17260651658522078}, {"alpha": 4.656005689076002, "batch_size": 135, "beta_1": 0.870503881627747, "beta_2": 0.9948873266941017, "epsilon": 2.1023308743480125e-07, "hidden_layer_sizes": 118, "learning_rate_init": 0.001878173875716191, "tol": 1.1889379831773006e-05, "validation_fraction": 0.6264327093752792}, {"alpha": 0.04705159350400542, "batch_size": 158, "beta_1": 0.9870884262730957, "beta_2": 0.9999596874382349, "epsilon": 1.1981845126013875e-08, "hidden_layer_sizes": 116, "learning_rate_init": 0.006173405204074311, "tol": 1.7414134181586194e-05, "validation_fraction": 0.6754299026638921}], [0.8103411294383143, 1.1966794219431733, 1.0917180832221862, 0.6669158249778174, 0.8111291382643813]]},
"data": {"coords": {"iter": {"dims": ["iter"], "attrs": {}, "data": [0, 1, 2, 3, 4, 5, 6, 7, 8, 9, 10, 11, 12, 13, 14, 15, 16, 17, 18, 19]}, "suggestion": {"dims": ["suggestion"], "attrs": {}, "data": [0]}}, "attrs": {}, "dims": {"iter": 20, "suggestion": 1}, "data_vars": {"alpha": {"dims": ["iter", "suggestion"], "attrs": {}, "data": [[0.036561904781760496], [2.4027421692619], [0.8850502513623], [0.004570844348102879], [8.572794433283265], [0.00018149745725090023], [0.7597823304076998], [0.00012841480440529114], [0.6734109124774289], [0.18320193643137456], [0.00025747822615791743], [2.0502078342066115e-05], [1.5477123825929329], [9.739730777346665], [8.647080352716188], [8.682987332188903], [0.19113275284305647], [5.581259090121873], [0.3708460047589659], [6.9578044783720205]]}, "batch_size": {"dims": ["iter", "suggestion"], "attrs": {}, "data": [[170], [36], [219], [76], [26], [212], [158], [33], [178], [162], [106], [165], [139], [94], [212], [104], [212], [60], [104], [101]]}, "beta_1": {"dims": ["iter", "suggestion"], "attrs": {}, "data": [[0.5859953598301552], [0.7546284044129254], [0.5900484329118468], [0.614273024704792], [0.9532140029408326], [0.5500399874565159], [0.7918918958045941], [0.8819575784880738], [0.6990083994673114], [0.6947235269652525], [0.8363303603716217], [0.6791578338039109], [0.5797500743517786], [0.916220935689802], [0.6495180432631591], [0.6668713609889819], [0.6044576178549224], [0.6766091848359359], [0.8252910870478033], [0.6891199978893566]]}, "beta_2": {"dims": ["iter", "suggestion"], "attrs": {}, "data": [[0.9264988069174285], [0.9262179844163309], [0.9425931399768172], [0.966449594935947], [0.9893589214161529], [0.9185359995570245], [0.9923766398387097], [0.9957393760787434], [0.9436468839610733], [0.9288194791827837], [0.9327076743468398], [0.9036031572453693], [0.992640122867923], [0.9963809649178457], [0.9985306237043116], [0.99865579215334], [0.9914385785538958], [0.9938632150151402], [0.9147700383971943], [0.9929149468919811]]}, "epsilon": {"dims": ["iter", "suggestion"], "attrs": {}, "data": [[3.410023168932672e-08], [3.2139193645331205e-07], [3.093911147726069e-09], [4.6925974247517217e-07], [3.927703011474001e-08], [2.651360295903292e-09], [3.594143874047319e-08], [4.510435701898362e-07], [9.44361902088615e-08], [1.5383559256634988e-08], [1.2459997230188207e-08], [3.3632207716208976e-07], [2.581187506397692e-08], [9.375808867327224e-08], [1.2929313882738095e-07], [4.738378539256234e-09], [4.4031099619127775e-08], [1.0821896399124826e-07], [7.998231891477692e-09], [5.635532143705572e-08]]}, "hidden_layer_sizes": {"dims": ["iter", "suggestion"], "attrs": {}, "data": [[86], [103], [105], [127], [74], [85], [83], [135], [93], [79], [80], [62], [56], [62], [53], [60], [60], [196], [152], [177]]}, "learning_rate_init": {"dims": ["iter", "suggestion"], "attrs": {}, "data": [[0.007680280788229868], [0.00036375873560153655], [1.8250157966054323e-05], [0.09182311693763], [0.00022273909549441428], [1.253820260052081e-05], [0.0031894100851386545], [1.0433464976262381e-05], [0.0071917728272228604], [0.00661971286475666], [0.0017567387835655073], [1.3062093243003685e-05], [0.004242969303846187], [0.004999368116540889], [0.0011005288503099545], [0.002979841343417301], [0.00906285810720776], [0.005823875658701763], [1.095434601051578e-05], [0.003315334710886582]]}, "tol": {"dims": ["iter", "suggestion"], "attrs": {}, "data": [[0.015036750648604715], [0.006339732337198597], [1.4084767070671119e-05], [2.8280153254635802e-05], [0.00012453947534228206], [0.03500680775725], [0.03592983407484141], [0.07774226654151713], [0.037115890885261835], [0.02832817004347565], [0.00020543183572596438], [0.0805447574138922], [0.0006549722016550225], [0.09934884315983503], [0.00010045686219157503], [0.0005540927315069222], [0.00039765449186352674], [0.03931205660879754], [0.00548870555619262], [0.02989740959295157]]}, "validation_fraction": {"dims": ["iter", "suggestion"], "attrs": {}, "data": [[0.21329082901274554], [0.44492661027611974], [0.8121441612992698], [0.6407136794041868], [0.4506596990861477], [0.22752781747838505], [0.1760531649307266], [0.1297012063376352], [0.15727923564484284], [0.21400067895145367], [0.15459529066889843], [0.39730282853585525], [0.24530259469466742], [0.21937950632404535], [0.16747905489608053], [0.17030507346046408], [0.5731952443756058], [0.12570086463241306], [0.11657195792281494], [0.3293891121471576]]}}}}
