# Supplementary material
Source: ML conference proceedings conference paper supplement (https://proceedings.neurips.cc/paper_files/paper/2022/hash/31a57804448363bcab777f818f75f5b4-Abstract.html)
Supplement: Supplementary file 1 [file 31a57804448363bcab777f818f75f5b4-Supplemental-Conference.zip › trading_off_resource_budgets_f-Supplementary Material/code_and_data/experiments/base_results/bo_20220228_124924_b7rkpeqg/suggest_log/0a7849c61dc35d049984abfb628f63ac.json]

{"meta": {"args": {"--uuid": "0a7849c61dc35d049984abfb628f63ac", "-db-root": "/home/damon_falck/blackboxbandits/experiments/saved_results", "--opt-root": "/home/damon_falck/blackboxbandits/experiments", "--data-root": "/home/damon_falck/blackboxbandits/experiments/penn_datasets", "--db": "bo_20220228_124924_b7rkpeqg", "--opt": "RandomSearch", "--data": "reg-228-elusage", "--classifier": "MLP-adam", "--metric": "mse", "--calls": 20, "--suggestions": 1, "--jobs-file": null, "--verbose": false, "dry_run": false, "rev": "bd14afd", "opt_rev": "0.0.8"}, "signature": [[{"alpha": 0.019628224813442792, "batch_size": 182, "beta_1": 0.9410202200271762, "beta_2": 0.9998021557676793, "epsilon": 1.8662266976518e-08, "hidden_layer_sizes": 147, "learning_rate_init": 0.0005627932047415167, "tol": 0.03690557729213761, "validation_fraction": 0.8846827852548593}, {"alpha": 0.001998246739232944, "batch_size": 200, "beta_1": 0.919111482530466, "beta_2": 0.9998488260436156, "epsilon": 5.981221901152555e-07, "hidden_layer_sizes": 61, "learning_rate_init": 2.2310905607443014e-05, "tol": 1.2046852412030316e-05, "validation_fraction": 0.8117896445826539}, {"alpha": 0.46659545670218433, "batch_size": 219, "beta_1": 0.9889789783750891, "beta_2": 0.9999896868093284, "epsilon": 2.4234724484675948e-08, "hidden_layer_sizes": 167, "learning_rate_init": 2.972334644335654e-05, "tol": 0.0036281404040243792, "validation_fraction": 0.17260651658522078}, {"alpha": 4.656005689076002, "batch_size": 135, "beta_1": 0.870503881627747, "beta_2": 0.9948873266941017, "epsilon": 2.1023308743480125e-07, "hidden_layer_sizes": 118, "learning_rate_init": 0.001878173875716191, "tol": 1.1889379831773006e-05, "validation_fraction": 0.6264327093752792}, {"alpha": 0.04705159350400542, "batch_size": 158, "beta_1": 0.9870884262730957, "beta_2": 0.9999596874382349, "epsilon": 1.1981845126013875e-08, "hidden_layer_sizes": 116, "learning_rate_init": 0.006173405204074311, "tol": 1.7414134181586194e-05, "validation_fraction": 0.6754299026638921}], [0.8179604199730048, 1.2781426534878488, 1.356351444238235, 0.609169839973662, 0.30510955649328]]},
"data": {"coords": {"iter": {"dims": ["iter"], "attrs": {}, "data": [0, 1, 2, 3, 4, 5, 6, 7, 8, 9, 10, 11, 12, 13, 14, 15, 16, 17, 18, 19]}, "suggestion": {"dims": ["suggestion"], "attrs": {}, "data": [0]}}, "attrs": {}, "dims": {"iter": 20, "suggestion": 1}, "data_vars": {"alpha": {"dims": ["iter", "suggestion"], "attrs": {}, "data": [[0.6783409272076933], [7.80523482846794e-05], [0.09502966961210624], [1.5108899943850675], [0.007230295327662316], [0.2791088452679037], [0.030795348633266273], [0.00089002507513925], [0.00014369978600540706], [0.00012255693788930475], [0.003852470125162286], [3.9996287075916297e-05], [0.01070085699343611], [0.0001417616272137013], [7.92351948098703e-05], [0.021741936454716195], [0.001399461756107948], [0.10777463641729966], [0.005457579152454084], [3.269784700776459]]}, "batch_size": {"dims": ["iter", "suggestion"], "attrs": {}, "data": [[114], [96], [96], [156], [173], [116], [229], [105], [110], [163], [33], [16], [78], [16], [82], [37], [111], [128], [81], [187]]}, "beta_1": {"dims": ["iter", "suggestion"], "attrs": {}, "data": [[0.570074897517145], [0.9840503473381796], [0.8822727720094315], [0.6297060513454971], [0.5681303270242518], [0.9618322622284992], [0.916891610836021], [0.968707515180639], [0.5156105052979477], [0.9400779786903564], [0.983892279108209], [0.8855335515324507], [0.9510814272819353], [0.7188647036973171], [0.7659414026507089], [0.8974296490463383], [0.8533469304455344], [0.9059978598321634], [0.7412211510575525], [0.9603793929258453]]}, "beta_2": {"dims": ["iter", "suggestion"], "attrs": {}, "data": [[0.9999976890497028], [0.9375292197487488], [0.9999908560587232], [0.9970252236303009], [0.9642696596977975], [0.9999847319147717], [0.99953552658757], [0.9923973398558975], [0.9987049176538171], [0.9999932556043303], [0.9999805072318602], [0.9999635333164141], [0.9971402693006249], [0.9999921487044416], [0.9999695106472456], [0.9999981003856181], [0.9999947328088915], [0.9999982634089518], [0.9999933872389385], [0.9999975364091637]]}, "epsilon": {"dims": ["iter", "suggestion"], "attrs": {}, "data": [[1.2605522063392254e-09], [4.896974627885925e-09], [1.3533669897789063e-08], [1.1090800221871544e-09], [8.126224944019554e-07], [1.1035440892678681e-09], [1.4624303454479101e-08], [2.1211380208089494e-07], [4.265137809619924e-07], [2.5889329528064662e-08], [2.7128470736404152e-08], [7.238817197386198e-09], [5.981658374544592e-09], [1.6502974776862564e-09], [5.561316685278632e-07], [4.8662198126465155e-09], [6.127790297474236e-09], [4.443748476636194e-07], [2.2214797817201488e-07], [4.2284781587096615e-07]]}, "hidden_layer_sizes": {"dims": ["iter", "suggestion"], "attrs": {}, "data": [[104], [147], [164], [73], [139], [136], [158], [146], [168], [75], [85], [154], [192], [115], [151], [156], [126], [141], [183], [53]]}, "learning_rate_init": {"dims": ["iter", "suggestion"], "attrs": {}, "data": [[0.0001512315292663652], [0.00954229943569587], [0.0013601747210890845], [0.026558428986185184], [0.0470125929730373], [3.340881589361922e-05], [0.0029518562709883183], [0.0002940263104658201], [0.0045055690456160345], [0.08569523461855895], [1.130057254300433e-05], [0.0001537771541513056], [0.0009229205974138308], [0.018936615126437153], [0.0002096583593018549], [2.857801724038353e-05], [0.06051174948832408], [0.009605932552476736], [0.0020797394943048884], [0.0001409252045861399]]}, "tol": {"dims": ["iter", "suggestion"], "attrs": {}, "data": [[0.03677072418160194], [0.007163417539837483], [7.062832155415527e-05], [0.0013625138349286682], [0.0016434874941320301], [0.02309820348271741], [0.0011699588349443177], [2.014046125443857e-05], [0.012345193263519214], [0.007427340018135379], [0.00032999896690476184], [5.367377611235422e-05], [0.00035330809441657085], [0.0043992132803200345], [0.06419936754772584], [0.0021232451112372015], [0.06966585026118183], [0.0006921315727636111], [0.01051248160956514], [0.00020549780274665486]]}, "validation_fraction": {"dims": ["iter", "suggestion"], "attrs": {}, "data": [[0.26916437653228514], [0.8736083277112096], [0.8011522622702842], [0.16139312015739812], [0.5241342175880872], [0.1540424754168215], [0.45067493450454016], [0.843460753238787], [0.20956286715983158], [0.7015469761361874], [0.41204766609285215], [0.4875839241353258], [0.1570015220800719], [0.609191417905667], [0.2983120142942987], [0.8796078365332449], [0.2531273881751068], [0.5724307123791288], [0.24918438902440762], [0.5909319192099398]]}}}}
