# Supplementary material
Source: ML conference proceedings conference paper supplement (https://proceedings.neurips.cc/paper_files/paper/2022/hash/31a57804448363bcab777f818f75f5b4-Abstract.html)
Supplement: Supplementary file 1 [file 31a57804448363bcab777f818f75f5b4-Supplemental-Conference.zip › trading_off_resource_budgets_f-Supplementary Material/code_and_data/experiments/base_results/bo_20220228_124924_b7rkpeqg/suggest_log/0a3462316baf545dac8d5f89f1cc54e3.json]

{"meta": {"args": {"--uuid": "0a3462316baf545dac8d5f89f1cc54e3", "-db-root": "/home/damon_falck/blackboxbandits/experiments/saved_results", "--opt-root": "/home/damon_falck/blackboxbandits/experiments", "--data-root": "/home/damon_falck/blackboxbandits/experiments/penn_datasets", "--db": "bo_20220228_124924_b7rkpeqg", "--opt": "Scikit-GBRT-Hedge", "--data": "reg-banana", "--classifier": "lasso", "--metric": "mse", "--calls": 20, "--suggestions": 1, "--jobs-file": null, "--verbose": false, "dry_run": false, "rev": "bd14afd", "opt_rev": "0.9.0"}, "signature": [[{"alpha": 1.5676677195506077, "fit_intercept": true, "max_iter": 423, "normalize": true, "positive": false, "tol": 0.0038333321561566623}, {"alpha": 0.5627932047415171, "fit_intercept": true, "max_iter": 3989, "normalize": false, "positive": true, "tol": 0.001304907355036239}, {"alpha": 1.871450068624068, "fit_intercept": true, "max_iter": 16, "normalize": false, "positive": false, "tol": 0.021403233140986057}, {"alpha": 12.960656597279737, "fit_intercept": true, "max_iter": 4378, "normalize": true, "positive": false, "tol": 0.013246974647468445}, {"alpha": 0.029723346443356558, "fit_intercept": true, "max_iter": 24, "normalize": true, "positive": true, "tol": 0.00045566719139214756}], [2.152017934787097, 2.152017934787097, 2.152017934787097, 2.152017934787097, 2.152017934787097]]},
"data": {"coords": {"iter": {"dims": ["iter"], "attrs": {}, "data": [0, 1, 2, 3, 4, 5, 6, 7, 8, 9, 10, 11, 12, 13, 14, 15, 16, 17, 18, 19]}, "suggestion": {"dims": ["suggestion"], "attrs": {}, "data": [0]}}, "attrs": {}, "dims": {"iter": 20, "suggestion": 1}, "data_vars": {"alpha": {"dims": ["iter", "suggestion"], "attrs": {}, "data": [[37.98952269142196], [1.4376869287149943], [0.0406843622095426], [35.39379689085023], [46.92356050138646], [42.83909945111336], [47.54032063340684], [45.570841151740495], [94.30049145545786], [58.23528289355552], [60.45511421484266], [85.93958411546481], [93.49425491534979], [45.19850126072997], [58.68673540905029], [85.24883129003564], [81.51473879892731], [47.65834647479528], [48.614317952779686], [74.97553069782467]]}, "fit_intercept": {"dims": ["iter", "suggestion"], "attrs": {}, "data": [[0], [0], [0], [0], [1], [1], [1], [1], [1], [1], [1], [1], [1], [1], [1], [1], [1], [1], [1], [1]]}, "max_iter": {"dims": ["iter", "suggestion"], "attrs": {}, "data": [[1972], [351], [3807], [2176], [993], [993], [3792], [3942], [3057], [999], [4142], [4964], [3834], [1131], [4565], [351], [1917], [869], [4202], [1791]]}, "normalize": {"dims": ["iter", "suggestion"], "attrs": {}, "data": [[0], [1], [0], [0], [1], [0], [0], [1], [1], [1], [1], [0], [1], [1], [0], [1], [0], [0], [0], [1]]}, "positive": {"dims": ["iter", "suggestion"], "attrs": {}, "data": [[1], [1], [1], [0], [1], [1], [0], [0], [1], [0], [1], [0], [0], [0], [1], [0], [1], [1], [1], [1]]}, "tol": {"dims": ["iter", "suggestion"], "attrs": {}, "data": [[0.0341429686989688], [1.3922853582077833e-05], [0.035752127439951514], [3.0791653974130956e-05], [0.0014942966829122808], [0.0002379268929187503], [0.0012626579846463394], [0.0011105328373611227], [9.349046933238041e-05], [0.00019434171260494058], [1.2575209215291983e-05], [0.00020962809326282572], [0.014149326073593633], [0.0005580764525725026], [0.0038677596231524187], [0.006411508547376754], [0.05373459062886399], [0.0006275546994964482], [0.00010062001159750756], [0.06080861249815545]]}}}}
