# Supplementary material
Source: ML conference proceedings conference paper supplement (https://proceedings.neurips.cc/paper_files/paper/2022/hash/31a57804448363bcab777f818f75f5b4-Abstract.html)
Supplement: Supplementary file 1 [file 31a57804448363bcab777f818f75f5b4-Supplemental-Conference.zip › trading_off_resource_budgets_f-Supplementary Material/code_and_data/experiments/base_results/bo_20220228_124924_b7rkpeqg/suggest_log/0aa8b803021d50eead85f3bac9844aba.json]

{"meta": {"args": {"--uuid": "0aa8b803021d50eead85f3bac9844aba", "-db-root": "/home/damon_falck/blackboxbandits/experiments/saved_results", "--opt-root": "/home/damon_falck/blackboxbandits/experiments", "--data-root": "/home/damon_falck/blackboxbandits/experiments/penn_datasets", "--db": "bo_20220228_124924_b7rkpeqg", "--opt": "Scikit-GBRT-Hedge", "--data": "clf-analcatdata-boxing2", "--classifier": "lasso", "--metric": "nll", "--calls": 20, "--suggestions": 1, "--jobs-file": null, "--verbose": false, "dry_run": false, "rev": "bd14afd", "opt_rev": "0.9.0"}, "signature": [[{"C": 1.5676677195506077, "intercept_scaling": 7.257005721594282}, {"C": 2.57663857461359, "intercept_scaling": 1.5119336467641016}, {"C": 0.49501595537331966, "intercept_scaling": 3.833332156156665}, {"C": 0.5627932047415171, "intercept_scaling": 36.905577292137636}, {"C": 71.55682161754872, "intercept_scaling": 0.34179529120610125}], [0.5505598944811837, 0.6054233537683646, 0.4941839205153228, 0.49023518002242394, 0.9280116039050933]]},
"data": {"coords": {"iter": {"dims": ["iter"], "attrs": {}, "data": [0, 1, 2, 3, 4, 5, 6, 7, 8, 9, 10, 11, 12, 13, 14, 15, 16, 17, 18, 19]}, "suggestion": {"dims": ["suggestion"], "attrs": {}, "data": [0]}}, "attrs": {}, "dims": {"iter": 20, "suggestion": 1}, "data_vars": {"C": {"dims": ["iter", "suggestion"], "attrs": {}, "data": [[5.750913207077633], [0.0513841159191356], [25.246969555779142], [9.864021791475883], [0.014739361820684126], [95.45068789916942], [0.03077021580955379], [0.2933670701775881], [0.1853011218642553], [0.2807918467159276], [0.8786020755450494], [1.011438665787994], [55.09987327294442], [0.16594874916565125], [0.5294236337806313], [2.1905080974653166], [0.9543839340570278], [0.6208654137241494], [0.43409184275049634], [0.4579761403946442]]}, "intercept_scaling": {"dims": ["iter", "suggestion"], "attrs": {}, "data": [[20.215451149390116], [0.03290921730058681], [0.3209258655908945], [5.678208560665389], [2.326785755195468], [0.5518688391764197], [0.08899888493641445], [0.045963136726406416], [0.06376357019726081], [0.044292447868440075], [0.047153645012020524], [0.04824560331235892], [0.040412259926666735], [0.04729769010397493], [0.04683565160994007], [0.046595265398493436], [0.046305828863925196], [0.04639348518941381], [0.04697049913058145], [0.04704688647816031]]}}}}
