# Supplementary material
Source: ML conference proceedings conference paper supplement (https://proceedings.neurips.cc/paper_files/paper/2022/hash/31a57804448363bcab777f818f75f5b4-Abstract.html)
Supplement: Supplementary file 1 [file 31a57804448363bcab777f818f75f5b4-Supplemental-Conference.zip › trading_off_resource_budgets_f-Supplementary Material/code_and_data/experiments/base_results/bo_20220228_124924_b7rkpeqg/suggest_log/0ac959b8e1b95518813bd14d7c628fc6.json]

{"meta": {"args": {"--uuid": "0ac959b8e1b95518813bd14d7c628fc6", "-db-root": "/home/damon_falck/blackboxbandits/experiments/saved_results", "--opt-root": "/home/damon_falck/blackboxbandits/experiments", "--data-root": "/home/damon_falck/blackboxbandits/experiments/penn_datasets", "--db": "bo_20220228_124924_b7rkpeqg", "--opt": "OpenTuner-GA-DE", "--data": "clf-clean1", "--classifier": "lasso", "--metric": "nll", "--calls": 20, "--suggestions": 1, "--jobs-file": null, "--verbose": false, "dry_run": false, "rev": "bd14afd", "opt_rev": "0.8.7"}, "signature": [[{"C": 1.5676677195506077, "intercept_scaling": 7.257005721594282}, {"C": 2.57663857461359, "intercept_scaling": 1.5119336467641016}, {"C": 0.49501595537331966, "intercept_scaling": 3.833332156156665}, {"C": 0.5627932047415171, "intercept_scaling": 36.905577292137636}, {"C": 71.55682161754872, "intercept_scaling": 0.34179529120610125}], [0.21090259958727908, 0.18804357777746988, 0.25891224024736836, 0.25042715948936134, 0.1999296292934258]]},
"data": {"coords": {"iter": {"dims": ["iter"], "attrs": {}, "data": [0, 1, 2, 3, 4, 5, 6, 7, 8, 9, 10, 11, 12, 13, 14, 15, 16, 17, 18, 19]}, "suggestion": {"dims": ["suggestion"], "attrs": {}, "data": [0]}}, "attrs": {}, "dims": {"iter": 20, "suggestion": 1}, "data_vars": {"C": {"dims": ["iter", "suggestion"], "attrs": {}, "data": [[6.207303238732466], [9.705839757721991], [3.170246953978629], [35.04179988248682], [67.52923479451552], [32.11398224156555], [6.595773685732778], [19.136137668032905], [61.77458997590974], [7.630894245768543], [4.871753766702843], [0.3645033476173618], [0.8373796523838111], [0.33790744644958526], [6.207303238732466], [62.98299426655], [1.9892325782213105], [7.860623304029026], [85.4613738256808], [63.489356764402395]]}, "intercept_scaling": {"dims": ["iter", "suggestion"], "attrs": {}, "data": [[0.9872715685901134], [1.9931012929710146], [0.9872715685901134], [3.9479934552548315], [0.9872715685901134], [50.29254626869816], [0.9872715685901134], [0.9872715685901134], [2.053716594254639], [0.3490436991272554], [2.497828026667287], [0.10343181531540079], [2.4660771825778816], [0.9872715685901134], [8.211818320073347], [94.1164891293223], [0.9872715685901134], [1.7014979409568005], [3.6724390323790024], [9.978836538075955]]}}}}
