# Supplementary material
Source: ML conference proceedings conference paper supplement (https://proceedings.neurips.cc/paper_files/paper/2022/hash/31a57804448363bcab777f818f75f5b4-Abstract.html)
Supplement: Supplementary file 1 [file 31a57804448363bcab777f818f75f5b4-Supplemental-Conference.zip › trading_off_resource_budgets_f-Supplementary Material/code_and_data/experiments/base_results/bo_20220228_124924_b7rkpeqg/suggest_log/0ad545bf5b445995ab6a0e4a90f44b37.json]

{"meta": {"args": {"--uuid": "0ad545bf5b445995ab6a0e4a90f44b37", "-db-root": "/home/damon_falck/blackboxbandits/experiments/saved_results", "--opt-root": "/home/damon_falck/blackboxbandits/experiments", "--data-root": "/home/damon_falck/blackboxbandits/experiments/penn_datasets", "--db": "bo_20220228_124924_b7rkpeqg", "--opt": "HyperOpt", "--data": "clf-mofn-3-7-10", "--classifier": "lasso", "--metric": "nll", "--calls": 20, "--suggestions": 1, "--jobs-file": null, "--verbose": false, "dry_run": false, "rev": "bd14afd", "opt_rev": "0.2.7"}, "signature": [[{"C": 1.5676677195506077, "intercept_scaling": 7.257005721594282}, {"C": 2.57663857461359, "intercept_scaling": 1.5119336467641016}, {"C": 0.49501595537331966, "intercept_scaling": 3.833332156156665}, {"C": 0.5627932047415171, "intercept_scaling": 36.905577292137636}, {"C": 71.55682161754872, "intercept_scaling": 0.34179529120610125}], [0.003802359652223025, 0.002575764760574057, 0.012397868274322708, 0.01041534227128548, 0.00016672712845936956]]},
"data": {"coords": {"iter": {"dims": ["iter"], "attrs": {}, "data": [0, 1, 2, 3, 4, 5, 6, 7, 8, 9, 10, 11, 12, 13, 14, 15, 16, 17, 18, 19]}, "suggestion": {"dims": ["suggestion"], "attrs": {}, "data": [0]}}, "attrs": {}, "dims": {"iter": 20, "suggestion": 1}, "data_vars": {"C": {"dims": ["iter", "suggestion"], "attrs": {}, "data": [[45.34700416099995], [93.37088482498307], [0.02151486908622503], [27.83305351967951], [0.6644070394655199], [1.040281370897108], [1.73814426073157], [0.06511195567390572], [0.024433212437511433], [0.6242139585471324], [24.176470584822834], [0.11586510009948842], [21.421013996884895], [52.66677513472563], [5.324876269445193], [63.25599681703711], [0.12837941055808202], [8.17792304642128], [0.05499109279446221], [1.4850472185255605]]}, "intercept_scaling": {"dims": ["iter", "suggestion"], "attrs": {}, "data": [[2.725229126948999], [0.017357822386588544], [30.036672045141973], [14.655644567525934], [76.77277791195114], [16.75463517060821], [5.934954900471567], [0.043936383544567664], [1.1715673277760947], [45.525929753216644], [38.26111887247962], [0.1764056184411374], [0.1140740616640933], [2.6994201924592405], [0.08582128179826257], [0.1093762343324189], [8.36653432742228], [32.084896735785954], [62.67700279810214], [0.132432321873387]]}}}}
