# Supplementary material
Source: ML conference proceedings conference paper supplement (https://proceedings.neurips.cc/paper_files/paper/2022/hash/31a57804448363bcab777f818f75f5b4-Abstract.html)
Supplement: Supplementary file 1 [file 31a57804448363bcab777f818f75f5b4-Supplemental-Conference.zip › trading_off_resource_budgets_f-Supplementary Material/code_and_data/experiments/base_results/bo_20220228_124924_b7rkpeqg/suggest_log/0af4a9983bd05e20b01951eacf109af7.json]

{"meta": {"args": {"--uuid": "0af4a9983bd05e20b01951eacf109af7", "-db-root": "/home/damon_falck/blackboxbandits/experiments/saved_results", "--opt-root": "/home/damon_falck/blackboxbandits/experiments", "--data-root": "/home/damon_falck/blackboxbandits/experiments/penn_datasets", "--db": "bo_20220228_124924_b7rkpeqg", "--opt": "Scikit-GP-LCB", "--data": "clf-parity5+5", "--classifier": "lasso", "--metric": "nll", "--calls": 20, "--suggestions": 1, "--jobs-file": null, "--verbose": false, "dry_run": false, "rev": "bd14afd", "opt_rev": "0.9.0"}, "signature": [[{"C": 1.5676677195506077, "intercept_scaling": 7.257005721594282}, {"C": 2.57663857461359, "intercept_scaling": 1.5119336467641016}, {"C": 0.49501595537331966, "intercept_scaling": 3.833332156156665}, {"C": 0.5627932047415171, "intercept_scaling": 36.905577292137636}, {"C": 71.55682161754872, "intercept_scaling": 0.34179529120610125}], [0.7039244013290442, 0.7040803444063243, 0.7024874008744073, 0.7029071444044869, 0.7045613289521724]]},
"data": {"coords": {"iter": {"dims": ["iter"], "attrs": {}, "data": [0, 1, 2, 3, 4, 5, 6, 7, 8, 9, 10, 11, 12, 13, 14, 15, 16, 17, 18, 19]}, "suggestion": {"dims": ["suggestion"], "attrs": {}, "data": [0]}}, "attrs": {}, "dims": {"iter": 20, "suggestion": 1}, "data_vars": {"C": {"dims": ["iter", "suggestion"], "attrs": {}, "data": [[45.49473220672545], [26.934353740251634], [2.9324935249465183], [3.136230654746598], [0.34208103913275656], [0.3196361953130677], [0.17686065155211414], [0.07282473340043066], [0.01], [0.018639635067543608], [0.028324614174652565], [0.01], [0.030933263028970658], [0.024540612357088844], [0.01294494171943727], [0.01620516189365336], [0.027091052187434624], [0.015425037647865398], [0.011526548485089754], [0.027480320145316203]]}, "intercept_scaling": {"dims": ["iter", "suggestion"], "attrs": {}, "data": [[0.6726572710803287], [0.01021919877327789], [9.200263949882828], [0.015623126716516595], [29.713751159575036], [33.63125338978504], [41.26420176242184], [32.72666612529337], [0.01], [100.0], [0.01], [100.0], [100.0], [100.0], [100.0], [3.4209341321938536], [100.0], [100.0], [100.0], [100.0]]}}}}
