# Supplementary material
Source: ML conference proceedings conference paper supplement (https://proceedings.neurips.cc/paper_files/paper/2022/hash/31a57804448363bcab777f818f75f5b4-Abstract.html)
Supplement: Supplementary file 1 [file 31a57804448363bcab777f818f75f5b4-Supplemental-Conference.zip › trading_off_resource_budgets_f-Supplementary Material/code_and_data/experiments/base_results/bo_20220228_124924_b7rkpeqg/suggest_log/0b3a0c1838365a858f9d413c0e998a70.json]

{"meta": {"args": {"--uuid": "0b3a0c1838365a858f9d413c0e998a70", "-db-root": "/home/damon_falck/blackboxbandits/experiments/saved_results", "--opt-root": "/home/damon_falck/blackboxbandits/experiments", "--data-root": "/home/damon_falck/blackboxbandits/experiments/penn_datasets", "--db": "bo_20220228_124924_b7rkpeqg", "--opt": "RandomSearch", "--data": "reg-228-elusage", "--classifier": "lasso", "--metric": "mse", "--calls": 20, "--suggestions": 1, "--jobs-file": null, "--verbose": false, "dry_run": false, "rev": "bd14afd", "opt_rev": "0.0.8"}, "signature": [[{"alpha": 1.5676677195506077, "fit_intercept": true, "max_iter": 423, "normalize": true, "positive": false, "tol": 0.0038333321561566623}, {"alpha": 0.5627932047415171, "fit_intercept": true, "max_iter": 3989, "normalize": false, "positive": true, "tol": 0.001304907355036239}, {"alpha": 1.871450068624068, "fit_intercept": true, "max_iter": 16, "normalize": false, "positive": false, "tol": 0.021403233140986057}, {"alpha": 12.960656597279737, "fit_intercept": true, "max_iter": 4378, "normalize": true, "positive": false, "tol": 0.013246974647468445}, {"alpha": 0.029723346443356558, "fit_intercept": true, "max_iter": 24, "normalize": true, "positive": true, "tol": 0.00045566719139214756}], [1.230387092749983, 1.230387092749983, 1.230387092749983, 1.230387092749983, 1.230387092749983]]},
"data": {"coords": {"iter": {"dims": ["iter"], "attrs": {}, "data": [0, 1, 2, 3, 4, 5, 6, 7, 8, 9, 10, 11, 12, 13, 14, 15, 16, 17, 18, 19]}, "suggestion": {"dims": ["suggestion"], "attrs": {}, "data": [0]}}, "attrs": {}, "dims": {"iter": 20, "suggestion": 1}, "data_vars": {"alpha": {"dims": ["iter", "suggestion"], "attrs": {}, "data": [[0.025999358209140948], [0.01082188902644946], [0.7288322818972255], [0.9675696411986809], [0.8663084888918696], [11.423429477079711], [1.5921193571981591], [15.193493046018514], [0.7701116566024904], [0.16736221835060147], [0.47404256772019787], [11.377273895769257], [0.2005618094419598], [1.0101055964633379], [0.0756310114892281], [0.02665161070062112], [1.613051134537264], [6.35009486155958], [68.86329794244685], [0.07106149113192155]]}, "fit_intercept": {"dims": ["iter", "suggestion"], "attrs": {}, "data": [[true], [false], [true], [true], [true], [false], [false], [true], [false], [false], [true], [false], [true], [false], [true], [true], [false], [false], [false], [true]]}, "max_iter": {"dims": ["iter", "suggestion"], "attrs": {}, "data": [[65], [53], [131], [429], [868], [666], [31], [1742], [3710], [2134], [276], [2314], [101], [20], [17], [3531], [125], [1605], [103], [274]]}, "normalize": {"dims": ["iter", "suggestion"], "attrs": {}, "data": [[false], [false], [true], [true], [false], [false], [false], [false], [true], [true], [false], [true], [false], [false], [false], [true], [true], [false], [false], [false]]}, "positive": {"dims": ["iter", "suggestion"], "attrs": {}, "data": [[true], [false], [true], [false], [true], [true], [true], [true], [true], [true], [false], [true], [true], [false], [true], [false], [false], [false], [true], [true]]}, "tol": {"dims": ["iter", "suggestion"], "attrs": {}, "data": [[0.007234159572684248], [0.00044770282922323903], [5.209844227150438e-05], [0.007475291583147058], [0.025363824601499853], [4.33131925765571e-05], [0.038208867585674613], [0.0001645741633798292], [0.004072928302430297], [0.057147615033138935], [5.5099135232216954e-05], [7.574975659288873e-05], [0.00017367032443630848], [5.9418812285958595e-05], [3.6867980014365095e-05], [0.006166228027463074], [0.0012059874225111935], [2.3694525224749046e-05], [0.0027708211935766245], [0.005806482203798734]]}}}}
