# Supplementary material
Source: ML conference proceedings conference paper supplement (https://proceedings.neurips.cc/paper_files/paper/2022/hash/31a57804448363bcab777f818f75f5b4-Abstract.html)
Supplement: Supplementary file 1 [file 31a57804448363bcab777f818f75f5b4-Supplemental-Conference.zip › trading_off_resource_budgets_f-Supplementary Material/code_and_data/experiments/base_results/bo_20220228_124924_b7rkpeqg/suggest_log/0b5e6ccef5f554df8eec18310a720c24.json]

{"meta": {"args": {"--uuid": "0b5e6ccef5f554df8eec18310a720c24", "-db-root": "/home/damon_falck/blackboxbandits/experiments/saved_results", "--opt-root": "/home/damon_falck/blackboxbandits/experiments", "--data-root": "/home/damon_falck/blackboxbandits/experiments/penn_datasets", "--db": "bo_20220228_124924_b7rkpeqg", "--opt": "HyperOpt", "--data": "clf-mushroom", "--classifier": "MLP-adam", "--metric": "nll", "--calls": 20, "--suggestions": 1, "--jobs-file": null, "--verbose": false, "dry_run": false, "rev": "bd14afd", "opt_rev": "0.2.7"}, "signature": [[{"alpha": 0.019628224813442792, "batch_size": 182, "beta_1": 0.9410202200271762, "beta_2": 0.9998021557676793, "epsilon": 1.8662266976518e-08, "hidden_layer_sizes": 147, "learning_rate_init": 0.0005627932047415167, "tol": 0.03690557729213761, "validation_fraction": 0.8846827852548593}, {"alpha": 0.001998246739232944, "batch_size": 200, "beta_1": 0.919111482530466, "beta_2": 0.9998488260436156, "epsilon": 5.981221901152555e-07, "hidden_layer_sizes": 61, "learning_rate_init": 2.2310905607443014e-05, "tol": 1.2046852412030316e-05, "validation_fraction": 0.8117896445826539}, {"alpha": 0.46659545670218433, "batch_size": 219, "beta_1": 0.9889789783750891, "beta_2": 0.9999896868093284, "epsilon": 2.4234724484675948e-08, "hidden_layer_sizes": 167, "learning_rate_init": 2.972334644335654e-05, "tol": 0.0036281404040243792, "validation_fraction": 0.17260651658522078}, {"alpha": 4.656005689076002, "batch_size": 135, "beta_1": 0.870503881627747, "beta_2": 0.9948873266941017, "epsilon": 2.1023308743480125e-07, "hidden_layer_sizes": 118, "learning_rate_init": 0.001878173875716191, "tol": 1.1889379831773006e-05, "validation_fraction": 0.6264327093752792}, {"alpha": 0.04705159350400542, "batch_size": 158, "beta_1": 0.9870884262730957, "beta_2": 0.9999596874382349, "epsilon": 1.1981845126013875e-08, "hidden_layer_sizes": 116, "learning_rate_init": 0.006173405204074311, "tol": 1.7414134181586194e-05, "validation_fraction": 0.6754299026638921}], [0.11247829028677332, 0.23954199874013077, 0.14839636315854907, 0.045861844746691686, 0.012514392088282422]]},
"data": {"coords": {"iter": {"dims": ["iter"], "attrs": {}, "data": [0, 1, 2, 3, 4, 5, 6, 7, 8, 9, 10, 11, 12, 13, 14, 15, 16, 17, 18, 19]}, "suggestion": {"dims": ["suggestion"], "attrs": {}, "data": [0]}}, "attrs": {}, "dims": {"iter": 20, "suggestion": 1}, "data_vars": {"alpha": {"dims": ["iter", "suggestion"], "attrs": {}, "data": [[0.0006773755352797307], [0.005588000850323845], [0.0005211352088554004], [0.00012496535032199913], [3.0441255022881584], [0.05197938313283878], [0.0007745226916372602], [1.384601538197731e-05], [0.007436413002254207], [1.5721253089080904], [0.002406842071454448], [0.46230942126721714], [5.430021177150974], [2.5209215745181193], [9.954841577723784], [4.925686561638564], [0.0014943650713914365], [0.0014255570905655189], [1.1459148214469972e-05], [0.016505295935761527]]}, "batch_size": {"dims": ["iter", "suggestion"], "attrs": {}, "data": [[238], [47], [93], [127], [119], [45], [15], [226], [64], [135], [66], [156], [228], [119], [48], [115], [66], [238], [131], [104]]}, "beta_1": {"dims": ["iter", "suggestion"], "attrs": {}, "data": [[0.8996033645250392], [0.5330474383791337], [0.8617184981402326], [0.5093243723161286], [0.6051533497091441], [0.5631604697872957], [0.5505609184839705], [0.5619428922967683], [0.7730309886191984], [0.8194893620295481], [0.5194959678541873], [0.5421724556504409], [0.8719829305644402], [0.9608286605173628], [0.5745104232608766], [0.5109611593586767], [0.565447228688376], [0.670439421189764], [0.6071304299550343], [0.8055512841285128]]}, "beta_2": {"dims": ["iter", "suggestion"], "attrs": {}, "data": [[0.9848582502265929], [0.9150398209337227], [0.9751283996562445], [0.9265313843825819], [0.9246186122986972], [0.9004441047247187], [0.9439521512903011], [0.9170526936993874], [0.996380223323197], [0.9848470559014537], [0.9670961798449915], [0.9397468933302185], [0.9331344413445469], [0.943945934760802], [0.9418442953824614], [0.9622150531045591], [0.9172999634507802], [0.969907961810861], [0.9332542714004387], [0.9682471531955023]]}, "epsilon": {"dims": ["iter", "suggestion"], "attrs": {}, "data": [[9.611197538532205e-07], [3.1803110476372937e-08], [6.554328252909976e-07], [7.863937186803282e-07], [6.34763460690397e-09], [1.4594825789533017e-08], [1.527741386464866e-09], [9.008647415447908e-07], [3.136310984528893e-09], [3.091926677887892e-07], [1.4866049000917502e-09], [4.1957769017093034e-07], [1.920413107657233e-08], [7.272101071612226e-09], [8.568017826914345e-09], [8.875493731176213e-07], [3.0337163255310386e-09], [2.859921632902591e-09], [6.331194204911397e-08], [5.577141916220865e-07]]}, "hidden_layer_sizes": {"dims": ["iter", "suggestion"], "attrs": {}, "data": [[72], [157], [74], [81], [188], [141], [154], [83], [121], [109], [192], [70], [79], [107], [162], [93], [153], [139], [176], [170]]}, "learning_rate_init": {"dims": ["iter", "suggestion"], "attrs": {}, "data": [[0.08847257249246498], [0.014219635999391904], [0.00019059462228090902], [2.2860295087736867e-05], [0.0014137348691311397], [0.017025206327007103], [0.00027854054036161285], [0.0006371694831560393], [0.0015063146947595209], [0.0007213971659205449], [0.010233175900696268], [1.1709377142458364e-05], [0.009955678772479413], [0.0019095262937009194], [0.011406938010851712], [0.0007171592336996342], [1.102552397856822e-05], [0.06248684719028869], [0.015020485090795075], [8.273721185829468e-05]]}, "tol": {"dims": ["iter", "suggestion"], "attrs": {}, "data": [[1.3283225065466153e-05], [0.007259787595591869], [0.04746311023440567], [0.07517794242536388], [0.01154275731711954], [1.0521186492780828e-05], [0.0001156734949510288], [0.00011987848903113996], [3.0202566268016544e-05], [0.00044267178704959217], [5.6115956400843295e-05], [0.0005456380950344489], [0.00287750580223782], [0.0011268452588135424], [8.82539557401802e-05], [2.252502297231612e-05], [0.00020789325651121826], [0.07347604041811219], [0.0001968660636692141], [0.013342512753956069]]}, "validation_fraction": {"dims": ["iter", "suggestion"], "attrs": {}, "data": [[0.23042592837887432], [0.22765124510103288], [0.10162993803577935], [0.3477560164369426], [0.8676275769219454], [0.2100310323159146], [0.16355154394572274], [0.26131339959828154], [0.3433130804133519], [0.11654811432109123], [0.10651127480918987], [0.5075490111690155], [0.1226805353291917], [0.1681333987796298], [0.36526236860315375], [0.24018725965546062], [0.5106006865277635], [0.8271289255799773], [0.28540010012120554], [0.15262689714851577]]}}}}
