# Supplementary material
Source: ML conference proceedings conference paper supplement (https://proceedings.neurips.cc/paper_files/paper/2022/hash/31a57804448363bcab777f818f75f5b4-Abstract.html)
Supplement: Supplementary file 1 [file 31a57804448363bcab777f818f75f5b4-Supplemental-Conference.zip › trading_off_resource_budgets_f-Supplementary Material/code_and_data/experiments/base_results/bo_20220228_124924_b7rkpeqg/suggest_log/0b6e7da4b89453839e775b45ec44b042.json]

{"meta": {"args": {"--uuid": "0b6e7da4b89453839e775b45ec44b042", "-db-root": "/home/damon_falck/blackboxbandits/experiments/saved_results", "--opt-root": "/home/damon_falck/blackboxbandits/experiments", "--data-root": "/home/damon_falck/blackboxbandits/experiments/penn_datasets", "--db": "bo_20220228_124924_b7rkpeqg", "--opt": "RandomSearch", "--data": "clf-car", "--classifier": "MLP-adam", "--metric": "nll", "--calls": 20, "--suggestions": 1, "--jobs-file": null, "--verbose": false, "dry_run": false, "rev": "bd14afd", "opt_rev": "0.0.8"}, "signature": [[{"alpha": 0.019628224813442792, "batch_size": 182, "beta_1": 0.9410202200271762, "beta_2": 0.9998021557676793, "epsilon": 1.8662266976518e-08, "hidden_layer_sizes": 147, "learning_rate_init": 0.0005627932047415167, "tol": 0.03690557729213761, "validation_fraction": 0.8846827852548593}, {"alpha": 0.001998246739232944, "batch_size": 200, "beta_1": 0.919111482530466, "beta_2": 0.9998488260436156, "epsilon": 5.981221901152555e-07, "hidden_layer_sizes": 61, "learning_rate_init": 2.2310905607443014e-05, "tol": 1.2046852412030316e-05, "validation_fraction": 0.8117896445826539}, {"alpha": 0.46659545670218433, "batch_size": 219, "beta_1": 0.9889789783750891, "beta_2": 0.9999896868093284, "epsilon": 2.4234724484675948e-08, "hidden_layer_sizes": 167, "learning_rate_init": 2.972334644335654e-05, "tol": 0.0036281404040243792, "validation_fraction": 0.17260651658522078}, {"alpha": 4.656005689076002, "batch_size": 135, "beta_1": 0.870503881627747, "beta_2": 0.9948873266941017, "epsilon": 2.1023308743480125e-07, "hidden_layer_sizes": 118, "learning_rate_init": 0.001878173875716191, "tol": 1.1889379831773006e-05, "validation_fraction": 0.6264327093752792}, {"alpha": 0.04705159350400542, "batch_size": 158, "beta_1": 0.9870884262730957, "beta_2": 0.9999596874382349, "epsilon": 1.1981845126013875e-08, "hidden_layer_sizes": 116, "learning_rate_init": 0.006173405204074311, "tol": 1.7414134181586194e-05, "validation_fraction": 0.6754299026638921}], [0.9364822469067462, 1.2402509785070976, 0.9609131418410579, 0.6302610389814806, 0.2024080726462952]]},
"data": {"coords": {"iter": {"dims": ["iter"], "attrs": {}, "data": [0, 1, 2, 3, 4, 5, 6, 7, 8, 9, 10, 11, 12, 13, 14, 15, 16, 17, 18, 19]}, "suggestion": {"dims": ["suggestion"], "attrs": {}, "data": [0]}}, "attrs": {}, "dims": {"iter": 20, "suggestion": 1}, "data_vars": {"alpha": {"dims": ["iter", "suggestion"], "attrs": {}, "data": [[0.0015615049688029637], [0.0006930894029485152], [0.2774353672317173], [0.0015195685567084402], [0.008357955495279767], [0.014397570200571762], [2.357023267398308], [1.7117538272383253], [0.0006554603955370818], [0.0060903344920740865], [0.3854560392542845], [1.3075280485892441e-05], [0.00035623260729033683], [0.00010808145537354918], [0.002454500440096968], [0.8180759727825281], [0.6893765357670376], [3.495005768864361], [3.1792894255317354], [0.4231007265060984]]}, "batch_size": {"dims": ["iter", "suggestion"], "attrs": {}, "data": [[188], [108], [185], [64], [154], [190], [14], [97], [33], [106], [199], [96], [45], [238], [232], [159], [186], [189], [186], [79]]}, "beta_1": {"dims": ["iter", "suggestion"], "attrs": {}, "data": [[0.9831703853315086], [0.8793952165414085], [0.8609874464139395], [0.9632663773542581], [0.9891726206684748], [0.8006802386267657], [0.9558832665347644], [0.9483995049540391], [0.9139430165191572], [0.9837408674723374], [0.7382660347070962], [0.9882051342907662], [0.9680454723188168], [0.7402075336540086], [0.7645727080014646], [0.5464022652122099], [0.8720889839797374], [0.9639532713746195], [0.976850134410047], [0.7230664086520175]]}, "beta_2": {"dims": ["iter", "suggestion"], "attrs": {}, "data": [[0.9958018560595916], [0.9999926905213519], [0.9997712547009011], [0.9364375422025624], [0.9133232942892797], [0.909440998014126], [0.999995767620164], [0.9999768455094352], [0.9999686311122222], [0.9999813791735209], [0.9988903019651967], [0.9700972517595664], [0.999912024458056], [0.9968019468157688], [0.9995499759964863], [0.9678096697134785], [0.9887536461047575], [0.9999336867740337], [0.9999981536944103], [0.9999925977861402]]}, "epsilon": {"dims": ["iter", "suggestion"], "attrs": {}, "data": [[4.56132162025998e-08], [3.87391364663563e-08], [1.3771899305007315e-09], [4.272603749493185e-09], [7.658922640307061e-09], [3.4281790047537012e-09], [2.5668513955407575e-07], [3.650591756491749e-08], [9.764456886047214e-07], [3.8036964722366506e-08], [2.209739959623659e-07], [6.912201963997424e-09], [1.5282934016122374e-09], [4.015833188961445e-08], [6.333536624111193e-07], [5.7769785715151904e-08], [9.384535954745961e-09], [2.4537439064326506e-07], [4.313928354946665e-09], [1.564267138668517e-09]]}, "hidden_layer_sizes": {"dims": ["iter", "suggestion"], "attrs": {}, "data": [[154], [154], [176], [107], [180], [114], [158], [75], [149], [67], [56], [69], [169], [70], [140], [124], [131], [177], [109], [184]]}, "learning_rate_init": {"dims": ["iter", "suggestion"], "attrs": {}, "data": [[0.0014846052235587288], [0.0007744721830986567], [0.07025959295476991], [0.01092746903828299], [0.0007555510407624622], [0.017665631577924112], [0.0034173241918671947], [0.00950614310048545], [6.151932482124942e-05], [0.0001641865398654217], [0.013797739658083822], [0.0016151034925994347], [3.558051538596832e-05], [7.667490069951785e-05], [3.898087400290252e-05], [0.0003428423457285622], [2.204683104381732e-05], [0.012781079335015454], [0.0004074368984589185], [3.517324808841338e-05]]}, "tol": {"dims": ["iter", "suggestion"], "attrs": {}, "data": [[0.09244679460580114], [0.009954720149163649], [7.581355235282337e-05], [0.005137515351901951], [0.0001892101234311157], [0.07164308546543868], [0.0011233276022004988], [0.0013804877313670864], [0.0001199893394131497], [0.000554614476484765], [7.262073595594153e-05], [0.0008226957406891902], [0.0049403931792155985], [6.098401242068427e-05], [1.3684512889006767e-05], [1.714012149583261e-05], [5.534261561066668e-05], [0.03907216240735897], [0.0023974150554974486], [3.4207771231757486e-05]]}, "validation_fraction": {"dims": ["iter", "suggestion"], "attrs": {}, "data": [[0.1383058509164374], [0.43166454601339793], [0.6586707689746504], [0.41772831448927245], [0.20937599787205022], [0.7538567796207176], [0.1359714583431199], [0.7161935942465981], [0.1685864429856518], [0.552870454578764], [0.33145330001049245], [0.15438241416778015], [0.8035754986619597], [0.7163185768079718], [0.3483361581322887], [0.8486217394646421], [0.55715755214475], [0.3151508019178369], [0.19947766386437715], [0.13826518833958346]]}}}}
