# Supplementary material
Source: ML conference proceedings conference paper supplement (https://proceedings.neurips.cc/paper_files/paper/2022/hash/31a57804448363bcab777f818f75f5b4-Abstract.html)
Supplement: Supplementary file 1 [file 31a57804448363bcab777f818f75f5b4-Supplemental-Conference.zip › trading_off_resource_budgets_f-Supplementary Material/code_and_data/experiments/base_results/bo_20220228_124924_b7rkpeqg/suggest_log/00b7ab1a3d495ef696939a4923e60458.json]

{"meta": {"args": {"--uuid": "00b7ab1a3d495ef696939a4923e60458", "-db-root": "/home/damon_falck/blackboxbandits/experiments/saved_results", "--opt-root": "/home/damon_falck/blackboxbandits/experiments", "--data-root": "/home/damon_falck/blackboxbandits/experiments/penn_datasets", "--db": "bo_20220228_124924_b7rkpeqg", "--opt": "Scikit-GBRT-Hedge", "--data": "clf-analcatdata-japansolvent", "--classifier": "MLP-adam", "--metric": "nll", "--calls": 20, "--suggestions": 1, "--jobs-file": null, "--verbose": false, "dry_run": false, "rev": "bd14afd", "opt_rev": "0.9.0"}, "signature": [[{"alpha": 0.019628224813442792, "batch_size": 182, "beta_1": 0.9410202200271762, "beta_2": 0.9998021557676793, "epsilon": 1.8662266976518e-08, "hidden_layer_sizes": 147, "learning_rate_init": 0.0005627932047415167, "tol": 0.03690557729213761, "validation_fraction": 0.8846827852548593}, {"alpha": 0.001998246739232944, "batch_size": 200, "beta_1": 0.919111482530466, "beta_2": 0.9998488260436156, "epsilon": 5.981221901152555e-07, "hidden_layer_sizes": 61, "learning_rate_init": 2.2310905607443014e-05, "tol": 1.2046852412030316e-05, "validation_fraction": 0.8117896445826539}, {"alpha": 0.46659545670218433, "batch_size": 219, "beta_1": 0.9889789783750891, "beta_2": 0.9999896868093284, "epsilon": 2.4234724484675948e-08, "hidden_layer_sizes": 167, "learning_rate_init": 2.972334644335654e-05, "tol": 0.0036281404040243792, "validation_fraction": 0.17260651658522078}, {"alpha": 4.656005689076002, "batch_size": 135, "beta_1": 0.870503881627747, "beta_2": 0.9948873266941017, "epsilon": 2.1023308743480125e-07, "hidden_layer_sizes": 118, "learning_rate_init": 0.001878173875716191, "tol": 1.1889379831773006e-05, "validation_fraction": 0.6264327093752792}, {"alpha": 0.04705159350400542, "batch_size": 158, "beta_1": 0.9870884262730957, "beta_2": 0.9999596874382349, "epsilon": 1.1981845126013875e-08, "hidden_layer_sizes": 116, "learning_rate_init": 0.006173405204074311, "tol": 1.7414134181586194e-05, "validation_fraction": 0.6754299026638921}], [0.6644063291044698, 0.7645460580591984, 0.716580402570385, 0.680293964698249, 0.593556837908479]]},
"data": {"coords": {"iter": {"dims": ["iter"], "attrs": {}, "data": [0, 1, 2, 3, 4, 5, 6, 7, 8, 9, 10, 11, 12, 13, 14, 15, 16, 17, 18, 19]}, "suggestion": {"dims": ["suggestion"], "attrs": {}, "data": [0]}}, "attrs": {}, "dims": {"iter": 20, "suggestion": 1}, "data_vars": {"alpha": {"dims": ["iter", "suggestion"], "attrs": {}, "data": [[0.9322332057033895], [0.20003057320459214], [0.7126910824593239], [0.0001588333539341921], [0.00010348969868888657], [0.21102294805090413], [0.001809630184128548], [0.0074780480957570075], [0.0022608142749381112], [1.7713842540307888e-05], [0.0016961892007501397], [1.1381659627913336e-05], [2.5484254094513457], [0.0368625380635085], [3.314165866743258e-05], [5.639362490310579], [0.0006213939680737749], [0.0067611148691553635], [1.0763977117088532e-05], [2.680670052905682]]}, "batch_size": {"dims": ["iter", "suggestion"], "attrs": {}, "data": [[148], [73], [170], [115], [209], [64], [24], [11], [24], [20], [44], [72], [86], [209], [50], [12], [110], [11], [88], [58]]}, "beta_1": {"dims": ["iter", "suggestion"], "attrs": {}, "data": [[0.6231469556987722], [0.9547783417665986], [0.5903497003573265], [0.8253528311679814], [0.8016612207197581], [0.9048133501539515], [0.9508712648337863], [0.967361495980586], [0.9568675554231635], [0.8831974996970641], [0.9493765193089007], [0.9782932656097151], [0.9363099968336938], [0.9419012523478398], [0.843396965568035], [0.9350111763160801], [0.9503172976544045], [0.9531749648606882], [0.8923566876260378], [0.9536947887016205]]}, "beta_2": {"dims": ["iter", "suggestion"], "attrs": {}, "data": [[0.9197162197742511], [0.9398056492556741], [0.9853944019533893], [0.9176229974243323], [0.9095210048867527], [0.9842270017112672], [0.9324643216061276], [0.933322172322608], [0.9801693369356854], [0.9180709736742788], [0.9258331565634887], [0.9100413013955526], [0.9195811880815122], [0.931998592311002], [0.9523413936860112], [0.914357459622931], [0.925016244660717], [0.9452755625410045], [0.9360195549918043], [0.9300350424848386]]}, "epsilon": {"dims": ["iter", "suggestion"], "attrs": {}, "data": [[1.7759225485473614e-07], [2.8430292795195553e-09], [4.297577006764483e-08], [4.999991580216197e-07], [8.985513870525841e-07], [1.259629212484276e-09], [1.127826977093019e-07], [1.2061716718691827e-09], [1.0025371929173087e-07], [2.2312278380239234e-07], [4.593315464140656e-07], [1.779393477235065e-09], [8.752789082730506e-08], [4.189532801241831e-07], [1.562470936413845e-07], [3.048309257420299e-07], [6.059785116142514e-07], [7.594841056938604e-09], [5.8254688081132946e-08], [2.450895958734214e-07]]}, "hidden_layer_sizes": {"dims": ["iter", "suggestion"], "attrs": {}, "data": [[150], [107], [53], [189], [199], [142], [135], [189], [112], [137], [107], [73], [160], [109], [198], [118], [189], [169], [175], [104]]}, "learning_rate_init": {"dims": ["iter", "suggestion"], "attrs": {}, "data": [[1.2979094795870918e-05], [0.010384724361887598], [7.48498667414562e-05], [0.0005434563973301823], [0.006681947779453315], [0.01189660195353385], [0.00434772632759635], [0.007985673781905137], [0.0733569863881498], [0.001620578625603605], [0.011032286027411038], [0.004619358656589739], [0.03069486568561434], [0.053504014325905326], [0.06703823128727401], [0.00030735899687980693], [0.023242698904203496], [0.0011874483016385284], [0.0666358429153895], [0.004812038010724792]]}, "tol": {"dims": ["iter", "suggestion"], "attrs": {}, "data": [[0.0005597510425646974], [0.030166393079309926], [0.00754053428132441], [0.0022822404832638817], [0.007779174196076166], [0.0783514560600574], [0.026943624225898966], [0.07223278563469969], [0.031513426661741034], [0.042859986247415584], [0.01580398673049002], [0.02847189915468621], [0.019455266497743987], [0.024600041844096452], [0.0014366167165775013], [0.03459702398679482], [0.014272373920592343], [0.02482482386197808], [0.0379002479034668], [0.015471513467715414]]}, "validation_fraction": {"dims": ["iter", "suggestion"], "attrs": {}, "data": [[0.13401680555108594], [0.6478299780251817], [0.5918128641057455], [0.29424475682016754], [0.15825495851497887], [0.13103700650360423], [0.6653493410279393], [0.8529016490010176], [0.8239945823869529], [0.23024880495230585], [0.12844919380339023], [0.11384027806654246], [0.5808211024879916], [0.5864649611644059], [0.8280718427316139], [0.3753557052370651], [0.24454780354710962], [0.8421109087092534], [0.12134433037227543], [0.3544766307173808]]}}}}
