# Supplementary material
Source: ML conference proceedings conference paper supplement (https://proceedings.neurips.cc/paper_files/paper/2022/hash/31a57804448363bcab777f818f75f5b4-Abstract.html)
Supplement: Supplementary file 1 [file 31a57804448363bcab777f818f75f5b4-Supplemental-Conference.zip › trading_off_resource_budgets_f-Supplementary Material/code_and_data/experiments/base_results/bo_20220228_124924_b7rkpeqg/suggest_log/0b80cab269365642b6723a65884b4444.json]

{"meta": {"args": {"--uuid": "0b80cab269365642b6723a65884b4444", "-db-root": "/home/damon_falck/blackboxbandits/experiments/saved_results", "--opt-root": "/home/damon_falck/blackboxbandits/experiments", "--data-root": "/home/damon_falck/blackboxbandits/experiments/penn_datasets", "--db": "bo_20220228_124924_b7rkpeqg", "--opt": "OpenTuner-GA", "--data": "reg-622-fri-c2-1000-50", "--classifier": "MLP-adam", "--metric": "mse", "--calls": 20, "--suggestions": 1, "--jobs-file": null, "--verbose": false, "dry_run": false, "rev": "bd14afd", "opt_rev": "0.8.7"}, "signature": [[{"alpha": 0.019628224813442792, "batch_size": 182, "beta_1": 0.9410202200271762, "beta_2": 0.9998021557676793, "epsilon": 1.8662266976518e-08, "hidden_layer_sizes": 147, "learning_rate_init": 0.0005627932047415167, "tol": 0.03690557729213761, "validation_fraction": 0.8846827852548593}, {"alpha": 0.001998246739232944, "batch_size": 200, "beta_1": 0.919111482530466, "beta_2": 0.9998488260436156, "epsilon": 5.981221901152555e-07, "hidden_layer_sizes": 61, "learning_rate_init": 2.2310905607443014e-05, "tol": 1.2046852412030316e-05, "validation_fraction": 0.8117896445826539}, {"alpha": 0.46659545670218433, "batch_size": 219, "beta_1": 0.9889789783750891, "beta_2": 0.9999896868093284, "epsilon": 2.4234724484675948e-08, "hidden_layer_sizes": 167, "learning_rate_init": 2.972334644335654e-05, "tol": 0.0036281404040243792, "validation_fraction": 0.17260651658522078}, {"alpha": 4.656005689076002, "batch_size": 135, "beta_1": 0.870503881627747, "beta_2": 0.9948873266941017, "epsilon": 2.1023308743480125e-07, "hidden_layer_sizes": 118, "learning_rate_init": 0.001878173875716191, "tol": 1.1889379831773006e-05, "validation_fraction": 0.6264327093752792}, {"alpha": 0.04705159350400542, "batch_size": 158, "beta_1": 0.9870884262730957, "beta_2": 0.9999596874382349, "epsilon": 1.1981845126013875e-08, "hidden_layer_sizes": 116, "learning_rate_init": 0.006173405204074311, "tol": 1.7414134181586194e-05, "validation_fraction": 0.6754299026638921}], [1.181363701118259, 2.0692613309078274, 1.1557897480749393, 0.8773934638549186, 0.9943353285642381]]},
"data": {"coords": {"iter": {"dims": ["iter"], "attrs": {}, "data": [0, 1, 2, 3, 4, 5, 6, 7, 8, 9, 10, 11, 12, 13, 14, 15, 16, 17, 18, 19]}, "suggestion": {"dims": ["suggestion"], "attrs": {}, "data": [0]}}, "attrs": {}, "dims": {"iter": 20, "suggestion": 1}, "data_vars": {"alpha": {"dims": ["iter", "suggestion"], "attrs": {}, "data": [[0.5517843687372462], [6.93416444179759], [6.035647677814476], [0.5727790893166503], [6.93416444179759], [0.44070075153535554], [1.3572562909931283], [6.93416444179759], [0.2100271797735353], [6.93416444179759], [6.93416444179759], [6.93416444179759], [9.234731520770202], [0.5371090105303881], [6.6687903627839455], [1.8880464326768762], [2.448516847956401], [6.6687903627839455], [1.6802064209884335], [0.67381922535651]]}, "batch_size": {"dims": ["iter", "suggestion"], "attrs": {}, "data": [[86], [129], [67], [25], [129], [31], [111], [129], [129], [129], [129], [129], [123], [173], [70], [186], [154], [70], [51], [240]]}, "beta_1": {"dims": ["iter", "suggestion"], "attrs": {}, "data": [[0.6765020195377816], [0.7698708046571667], [0.9370707606829969], [0.9475858627215672], [0.7698708046571667], [0.789507887302403], [0.8155838652315259], [0.7698708046571667], [0.7698708046571667], [0.7698708046571667], [0.7698708046571667], [0.7698708046571667], [0.9394842202140105], [0.7750649616358898], [0.6303391393426415], [0.8326373504456783], [0.583030405448715], [0.6303391393426415], [0.9178159948158593], [0.5168953412797842]]}, "beta_2": {"dims": ["iter", "suggestion"], "attrs": {}, "data": [[0.9481695204378437], [0.9468146418249659], [0.9114911700381325], [0.9183966827777523], [0.9468146418249659], [0.9537846995939376], [0.9796608089120457], [0.9528881751814184], [0.9468146418249659], [0.9468146418249659], [0.9468146418249659], [0.9091028655397799], [0.9794194458523255], [0.9162712810509347], [0.9725158022312097], [0.9675912457515679], [0.9948703600379482], [0.9725158022312097], [0.9424421901211304], [0.9269762002184575]]}, "epsilon": {"dims": ["iter", "suggestion"], "attrs": {}, "data": [[1.587928516738325e-07], [1.7328761417520388e-07], [1.6950015960301334e-07], [1.3482336017109253e-07], [1.7328761417520388e-07], [9.309544627694445e-07], [8.486662585188421e-07], [1.7328761417520388e-07], [1.7328761417520388e-07], [1.7328761417520388e-07], [1.7328761417520388e-07], [1.7328761417520388e-07], [9.1753573952577e-07], [3.622014674025943e-07], [3.606530621422144e-08], [1.6487960277697288e-07], [9.392688046510878e-07], [3.606530621422144e-08], [5.745823149777275e-07], [9.88085902348639e-07]]}, "hidden_layer_sizes": {"dims": ["iter", "suggestion"], "attrs": {}, "data": [[143], [120], [143], [189], [120], [151], [104], [120], [120], [120], [84], [120], [120], [81], [103], [165], [94], [103], [136], [56]]}, "learning_rate_init": {"dims": ["iter", "suggestion"], "attrs": {}, "data": [[0.09085249965443236], [0.04698584471564209], [0.031947875187525225], [0.06643803688501142], [0.006292557297819124], [0.025154802234450924], [0.04533450368712837], [0.04698584471564209], [0.04698584471564209], [0.04698584471564209], [0.04698584471564209], [0.04698584471564209], [0.02336667465135538], [0.03927156210956489], [0.04759182271579692], [0.0010773351542442866], [0.014629048484264984], [0.04759182271579692], [0.035084582746367436], [0.04831315895888382]]}, "tol": {"dims": ["iter", "suggestion"], "attrs": {}, "data": [[0.011025780317184864], [0.04286516261255862], [0.07599637040886502], [0.046021346623694885], [0.04286516261255862], [0.029313640396453056], [0.0346505691702707], [0.04286516261255862], [0.04286516261255862], [0.04286516261255862], [0.04286516261255862], [0.04286516261255862], [0.011883642951722773], [0.0390002479049149], [0.08679647205153833], [0.06325142189685133], [0.016617928359403834], [0.09841616156640069], [0.06648768686250832], [0.07516122159472231]]}, "validation_fraction": {"dims": ["iter", "suggestion"], "attrs": {}, "data": [[0.7291055132331351], [0.6109295460762227], [0.802577965375646], [0.2542911235772546], [0.6109295460762227], [0.10521757827025979], [0.6617417593966592], [0.6109295460762227], [0.6109295460762227], [0.8860518633832122], [0.6109295460762227], [0.6109295460762227], [0.13031427893631886], [0.16349248075385797], [0.10104264858176358], [0.6650294462904791], [0.16515626483333623], [0.10104264858176358], [0.8246128092830968], [0.1803988578625405]]}}}}
