# Supplementary material
Source: ML conference proceedings conference paper supplement (https://proceedings.neurips.cc/paper_files/paper/2022/hash/31a57804448363bcab777f818f75f5b4-Abstract.html)
Supplement: Supplementary file 1 [file 31a57804448363bcab777f818f75f5b4-Supplemental-Conference.zip › trading_off_resource_budgets_f-Supplementary Material/code_and_data/experiments/base_results/bo_20220228_124924_b7rkpeqg/suggest_log/0b367d7c2b0e57ed9dd3363ac6d11c07.json]

{"meta": {"args": {"--uuid": "0b367d7c2b0e57ed9dd3363ac6d11c07", "-db-root": "/home/damon_falck/blackboxbandits/experiments/saved_results", "--opt-root": "/home/damon_falck/blackboxbandits/experiments", "--data-root": "/home/damon_falck/blackboxbandits/experiments/penn_datasets", "--db": "bo_20220228_124924_b7rkpeqg", "--opt": "OpenTuner-GA-DE", "--data": "clf-analcatdata-boxing2", "--classifier": "lasso", "--metric": "nll", "--calls": 20, "--suggestions": 1, "--jobs-file": null, "--verbose": false, "dry_run": false, "rev": "bd14afd", "opt_rev": "0.8.7"}, "signature": [[{"C": 1.5676677195506077, "intercept_scaling": 7.257005721594282}, {"C": 2.57663857461359, "intercept_scaling": 1.5119336467641016}, {"C": 0.49501595537331966, "intercept_scaling": 3.833332156156665}, {"C": 0.5627932047415171, "intercept_scaling": 36.905577292137636}, {"C": 71.55682161754872, "intercept_scaling": 0.34179529120610125}], [0.5505598944811837, 0.6054233537683646, 0.4941839205153228, 0.49023518002242394, 0.9280116039050933]]},
"data": {"coords": {"iter": {"dims": ["iter"], "attrs": {}, "data": [0, 1, 2, 3, 4, 5, 6, 7, 8, 9, 10, 11, 12, 13, 14, 15, 16, 17, 18, 19]}, "suggestion": {"dims": ["suggestion"], "attrs": {}, "data": [0]}}, "attrs": {}, "dims": {"iter": 20, "suggestion": 1}, "data_vars": {"C": {"dims": ["iter", "suggestion"], "attrs": {}, "data": [[1.129427785758849], [1.7219842491625565], [10.17047608025992], [2.1683144912316252], [1.129427785758849], [1.129427785758849], [7.0180521192132375], [0.7046913342200138], [4.254754707699882], [37.48025343063934], [5.637275187259827], [28.04088461893685], [36.387440096508975], [34.942394971626754], [0.7046913342200138], [6.49196039285258], [13.856723060708486], [0.5757482173826183], [7.34613274986517], [73.83283829630665]]}, "intercept_scaling": {"dims": ["iter", "suggestion"], "attrs": {}, "data": [[0.03007111442886256], [0.03007111442886256], [74.46109802454576], [9.016369935943265], [17.478146825744158], [19.477249202236077], [17.478146825744158], [54.5913182516117], [46.51160385684544], [54.5913182516117], [5.020750454740971], [54.5913182516117], [1.3445828140726548], [0.5441634633258445], [26.20158040134095], [0.9493592918056639], [87.66593389482615], [63.35906753955582], [10.126002726252922], [2.3635854041484747]]}}}}
