# Supplementary material
Source: ML conference proceedings conference paper supplement (https://proceedings.neurips.cc/paper_files/paper/2022/hash/31a57804448363bcab777f818f75f5b4-Abstract.html)
Supplement: Supplementary file 1 [file 31a57804448363bcab777f818f75f5b4-Supplemental-Conference.zip › trading_off_resource_budgets_f-Supplementary Material/code_and_data/experiments/base_results/bo_20220228_124924_b7rkpeqg/suggest_log/0b0616ee3edc5ffa92ca426571ea2e1d.json]

{"meta": {"args": {"--uuid": "0b0616ee3edc5ffa92ca426571ea2e1d", "-db-root": "/home/damon_falck/blackboxbandits/experiments/saved_results", "--opt-root": "/home/damon_falck/blackboxbandits/experiments", "--data-root": "/home/damon_falck/blackboxbandits/experiments/penn_datasets", "--db": "bo_20220228_124924_b7rkpeqg", "--opt": "Scikit-GBRT-Hedge", "--data": "reg-228-elusage", "--classifier": "MLP-adam", "--metric": "mse", "--calls": 20, "--suggestions": 1, "--jobs-file": null, "--verbose": false, "dry_run": false, "rev": "bd14afd", "opt_rev": "0.9.0"}, "signature": [[{"alpha": 0.019628224813442792, "batch_size": 182, "beta_1": 0.9410202200271762, "beta_2": 0.9998021557676793, "epsilon": 1.8662266976518e-08, "hidden_layer_sizes": 147, "learning_rate_init": 0.0005627932047415167, "tol": 0.03690557729213761, "validation_fraction": 0.8846827852548593}, {"alpha": 0.001998246739232944, "batch_size": 200, "beta_1": 0.919111482530466, "beta_2": 0.9998488260436156, "epsilon": 5.981221901152555e-07, "hidden_layer_sizes": 61, "learning_rate_init": 2.2310905607443014e-05, "tol": 1.2046852412030316e-05, "validation_fraction": 0.8117896445826539}, {"alpha": 0.46659545670218433, "batch_size": 219, "beta_1": 0.9889789783750891, "beta_2": 0.9999896868093284, "epsilon": 2.4234724484675948e-08, "hidden_layer_sizes": 167, "learning_rate_init": 2.972334644335654e-05, "tol": 0.0036281404040243792, "validation_fraction": 0.17260651658522078}, {"alpha": 4.656005689076002, "batch_size": 135, "beta_1": 0.870503881627747, "beta_2": 0.9948873266941017, "epsilon": 2.1023308743480125e-07, "hidden_layer_sizes": 118, "learning_rate_init": 0.001878173875716191, "tol": 1.1889379831773006e-05, "validation_fraction": 0.6264327093752792}, {"alpha": 0.04705159350400542, "batch_size": 158, "beta_1": 0.9870884262730957, "beta_2": 0.9999596874382349, "epsilon": 1.1981845126013875e-08, "hidden_layer_sizes": 116, "learning_rate_init": 0.006173405204074311, "tol": 1.7414134181586194e-05, "validation_fraction": 0.6754299026638921}], [0.8179604199730048, 1.2781426534878488, 1.356351444238235, 0.609169839973662, 0.30510955649328]]},
"data": {"coords": {"iter": {"dims": ["iter"], "attrs": {}, "data": [0, 1, 2, 3, 4, 5, 6, 7, 8, 9, 10, 11, 12, 13, 14, 15, 16, 17, 18, 19]}, "suggestion": {"dims": ["suggestion"], "attrs": {}, "data": [0]}}, "attrs": {}, "dims": {"iter": 20, "suggestion": 1}, "data_vars": {"alpha": {"dims": ["iter", "suggestion"], "attrs": {}, "data": [[0.004576523149065653], [0.03730459088213725], [0.00037527399155901423], [9.221985240153524], [0.03741411524850064], [0.12953270591131197], [0.06679454490490544], [0.019937467954099085], [0.04325172032809431], [0.08197228301945626], [0.005786489261830936], [0.025729730150445617], [0.03435230931410331], [0.13567738631647286], [0.4186484903717949], [0.0043420918778153406], [0.005038593611182031], [0.0005791753919403016], [0.11506132827116637], [0.13591974989939665]]}, "batch_size": {"dims": ["iter", "suggestion"], "attrs": {}, "data": [[55], [207], [165], [142], [114], [16], [206], [34], [122], [102], [84], [109], [90], [128], [231], [47], [36], [106], [28], [97]]}, "beta_1": {"dims": ["iter", "suggestion"], "attrs": {}, "data": [[0.8297662250928262], [0.5728943302521562], [0.8901933430409839], [0.5190413929586527], [0.6122166148490474], [0.9256104301310171], [0.6898517505026558], [0.5847227408212399], [0.667321998821807], [0.7112078744390625], [0.943096676675467], [0.7370372966947772], [0.5387392776580073], [0.6021866640257579], [0.6429028082384017], [0.5953140387163893], [0.6828118397401685], [0.9462777508754826], [0.6311032329917577], [0.6652426758417845]]}, "beta_2": {"dims": ["iter", "suggestion"], "attrs": {}, "data": [[0.9026701370639029], [0.9989719367021846], [0.9107067409104351], [0.9553325224831419], [0.925295761001961], [0.9542063356551714], [0.9675050763505131], [0.9342596635988489], [0.9035309318034768], [0.9191102574709004], [0.908307568563107], [0.9529068366900308], [0.9322060496596385], [0.9493668233155419], [0.9060037050686043], [0.9887900513271342], [0.906946869293436], [0.9368836565037855], [0.9972661394084377], [0.9577759477794026]]}, "epsilon": {"dims": ["iter", "suggestion"], "attrs": {}, "data": [[1.1930450460670069e-07], [2.987547729447721e-08], [1.4681084445245496e-09], [2.283800180570173e-09], [1.6170951741391929e-09], [1.1218454051282644e-09], [1.7909888363823906e-09], [1.662873537922495e-09], [1.358549999198157e-09], [1.3593920817807554e-09], [1.121955645950595e-09], [1.0286590131011592e-09], [1.269526734806193e-09], [1.3151035806467334e-09], [1.3101981636357272e-09], [1.2772395227323663e-09], [1.662801543247038e-09], [1.308885452065128e-09], [1.2416913667153495e-09], [1.0082354777977389e-09]]}, "hidden_layer_sizes": {"dims": ["iter", "suggestion"], "attrs": {}, "data": [[108], [170], [173], [126], [118], [119], [114], [101], [107], [73], [128], [104], [121], [77], [185], [86], [113], [59], [76], [98]]}, "learning_rate_init": {"dims": ["iter", "suggestion"], "attrs": {}, "data": [[2.1245682597708958e-05], [0.00038256736849548087], [0.0005746400677858195], [0.0239077327173831], [0.019418860192759527], [0.004523410602686493], [0.0033691841060723296], [0.019685427007293376], [0.004155965141969824], [0.01199456290822167], [0.01703694028745234], [0.014636043310691817], [2.365522684684264e-05], [0.019713247757046488], [0.04150139979704311], [0.013577193525578362], [0.015100056555871988], [0.029678158741649027], [0.0004330632692655325], [0.015615245657750517]]}, "tol": {"dims": ["iter", "suggestion"], "attrs": {}, "data": [[2.993452209353749e-05], [0.07928677404563514], [0.01639040774986525], [0.002936532222487178], [0.0070258779460727165], [0.0511738437709855], [0.026433710394144407], [0.02020097162770421], [0.045739132144079535], [0.009842128986480058], [0.08055622602489541], [0.007560916775328983], [0.006365359629274008], [0.016074637023180575], [0.013900697670711407], [0.017031999052512275], [0.08466562214043508], [0.014846240563913543], [0.08174351654144144], [0.00014537117256568552]]}, "validation_fraction": {"dims": ["iter", "suggestion"], "attrs": {}, "data": [[0.12861320571525778], [0.1758021032663683], [0.34167216860711375], [0.6619210435114111], [0.26039183186833414], [0.37490736533740626], [0.8973088676109358], [0.7309008414781908], [0.15402928846521544], [0.24396062220634573], [0.3008007080203037], [0.3932803651444311], [0.13565758953255505], [0.5158759431449353], [0.8883557735145233], [0.6082610795238785], [0.2616220866596492], [0.6202659938492517], [0.30682920885086346], [0.10656482965409422]]}}}}
