# Supplementary material
Source: ML conference proceedings conference paper supplement (https://proceedings.neurips.cc/paper_files/paper/2022/hash/31a57804448363bcab777f818f75f5b4-Abstract.html)
Supplement: Supplementary file 1 [file 31a57804448363bcab777f818f75f5b4-Supplemental-Conference.zip › trading_off_resource_budgets_f-Supplementary Material/code_and_data/experiments/base_results/bo_20220228_124924_b7rkpeqg/suggest_log/0b5159ec3609517f819438d28566adf0.json]

{"meta": {"args": {"--uuid": "0b5159ec3609517f819438d28566adf0", "-db-root": "/home/damon_falck/blackboxbandits/experiments/saved_results", "--opt-root": "/home/damon_falck/blackboxbandits/experiments", "--data-root": "/home/damon_falck/blackboxbandits/experiments/penn_datasets", "--db": "bo_20220228_124924_b7rkpeqg", "--opt": "Scikit-GP-Hedge", "--data": "clf-allrep", "--classifier": "lasso", "--metric": "nll", "--calls": 20, "--suggestions": 1, "--jobs-file": null, "--verbose": false, "dry_run": false, "rev": "bd14afd", "opt_rev": "0.9.0"}, "signature": [[{"C": 1.5676677195506077, "intercept_scaling": 7.257005721594282}, {"C": 2.57663857461359, "intercept_scaling": 1.5119336467641016}, {"C": 0.49501595537331966, "intercept_scaling": 3.833332156156665}, {"C": 0.5627932047415171, "intercept_scaling": 36.905577292137636}, {"C": 71.55682161754872, "intercept_scaling": 0.34179529120610125}], [0.12533642168002496, 0.1273935391678564, 0.11682120417132295, 0.11787462028894306, 0.1880393871227425]]},
"data": {"coords": {"iter": {"dims": ["iter"], "attrs": {}, "data": [0, 1, 2, 3, 4, 5, 6, 7, 8, 9, 10, 11, 12, 13, 14, 15, 16, 17, 18, 19]}, "suggestion": {"dims": ["suggestion"], "attrs": {}, "data": [0]}}, "attrs": {}, "dims": {"iter": 20, "suggestion": 1}, "data_vars": {"C": {"dims": ["iter", "suggestion"], "attrs": {}, "data": [[28.984177094030997], [6.186632194661215], [0.07399619686905906], [0.02085615313260064], [0.06894971893061898], [0.024976136202988507], [0.1452590077656928], [86.82490923247902], [0.4448566066018902], [100.0], [0.7758492797229302], [3.976859238857726], [100.0], [0.29288405553932617], [1.5315663871142595], [0.21889651338940677], [0.01], [0.7607863117712264], [5.279648749404326], [0.4145244708251468]]}, "intercept_scaling": {"dims": ["iter", "suggestion"], "attrs": {}, "data": [[1.2765459369289884], [0.10905424615341615], [49.45448128852592], [1.161393991090585], [0.08793327015826644], [72.73422095169727], [88.05671596112143], [0.01], [100.0], [100.0], [12.62733105069246], [100.0], [0.17630256657716878], [29.68660832086936], [1.153097046266994], [5.620780154141599], [11.530800260875811], [3.3057410798618965], [0.46754792330118267], [1.2497184163176176]]}}}}
