# Supplementary material
Source: ML conference proceedings conference paper supplement (https://proceedings.neurips.cc/paper_files/paper/2022/hash/31a57804448363bcab777f818f75f5b4-Abstract.html)
Supplement: Supplementary file 1 [file 31a57804448363bcab777f818f75f5b4-Supplemental-Conference.zip › trading_off_resource_budgets_f-Supplementary Material/code_and_data/experiments/base_results/bo_20220228_124924_b7rkpeqg/suggest_log/00b9849a9f0d5ebeaffd78bcd998fe38.json]

{"meta": {"args": {"--uuid": "00b9849a9f0d5ebeaffd78bcd998fe38", "-db-root": "/home/damon_falck/blackboxbandits/experiments/saved_results", "--opt-root": "/home/damon_falck/blackboxbandits/experiments", "--data-root": "/home/damon_falck/blackboxbandits/experiments/penn_datasets", "--db": "bo_20220228_124924_b7rkpeqg", "--opt": "Scikit-GP-Hedge", "--data": "reg-547-no2", "--classifier": "lasso", "--metric": "mse", "--calls": 20, "--suggestions": 1, "--jobs-file": null, "--verbose": false, "dry_run": false, "rev": "bd14afd", "opt_rev": "0.9.0"}, "signature": [[{"alpha": 1.5676677195506077, "fit_intercept": true, "max_iter": 423, "normalize": true, "positive": false, "tol": 0.0038333321561566623}, {"alpha": 0.5627932047415171, "fit_intercept": true, "max_iter": 3989, "normalize": false, "positive": true, "tol": 0.001304907355036239}, {"alpha": 1.871450068624068, "fit_intercept": true, "max_iter": 16, "normalize": false, "positive": false, "tol": 0.021403233140986057}, {"alpha": 12.960656597279737, "fit_intercept": true, "max_iter": 4378, "normalize": true, "positive": false, "tol": 0.013246974647468445}, {"alpha": 0.029723346443356558, "fit_intercept": true, "max_iter": 24, "normalize": true, "positive": true, "tol": 0.00045566719139214756}], [1.2509215007731638, 1.2326218184482467, 1.2509215007731638, 1.2509215007731638, 1.2168713574116659]]},
"data": {"coords": {"iter": {"dims": ["iter"], "attrs": {}, "data": [0, 1, 2, 3, 4, 5, 6, 7, 8, 9, 10, 11, 12, 13, 14, 15, 16, 17, 18, 19]}, "suggestion": {"dims": ["suggestion"], "attrs": {}, "data": [0]}}, "attrs": {}, "dims": {"iter": 20, "suggestion": 1}, "data_vars": {"alpha": {"dims": ["iter", "suggestion"], "attrs": {}, "data": [[10.460299200715866], [0.011233973460276011], [0.22219842005146134], [0.4069196015479787], [0.5310436029136113], [0.037661358570636676], [0.01], [0.01], [0.044662636386767755], [0.06319658283715099], [0.022820848483557053], [0.36624573265594523], [0.01], [100.0], [0.1040386119599698], [0.01], [0.01], [0.01], [0.022787994117668974], [0.01]]}, "fit_intercept": {"dims": ["iter", "suggestion"], "attrs": {}, "data": [[0], [1], [0], [0], [1], [0], [0], [1], [1], [0], [1], [1], [1], [1], [1], [1], [0], [0], [0], [0]]}, "max_iter": {"dims": ["iter", "suggestion"], "attrs": {}, "data": [[2978], [4778], [3984], [1900], [4247], [4874], [10], [10], [10], [10], [10], [4858], [80], [5000], [4655], [23], [3318], [1859], [10], [10]]}, "normalize": {"dims": ["iter", "suggestion"], "attrs": {}, "data": [[1], [1], [0], [1], [0], [0], [1], [0], [0], [1], [0], [1], [1], [1], [1], [1], [0], [0], [0], [0]]}, "positive": {"dims": ["iter", "suggestion"], "attrs": {}, "data": [[0], [0], [1], [0], [0], [1], [1], [1], [1], [1], [1], [1], [1], [0], [0], [1], [0], [0], [0], [0]]}, "tol": {"dims": ["iter", "suggestion"], "attrs": {}, "data": [[0.03502114083771425], [0.03263235296565913], [2.586117536229132e-05], [0.001092868257203616], [1.2988077444928744e-05], [0.0001267972411318085], [0.1], [1e-05], [1e-05], [1e-05], [1e-05], [2.5930752987915686e-05], [3.442422324597903e-05], [2.880871709589361e-05], [0.000352195465916065], [5.300812939865792e-05], [0.1], [0.1], [1e-05], [1e-05]]}}}}
