# Supplementary material
Source: ML conference proceedings conference paper supplement (https://proceedings.neurips.cc/paper_files/paper/2022/hash/31a57804448363bcab777f818f75f5b4-Abstract.html)
Supplement: Supplementary file 1 [file 31a57804448363bcab777f818f75f5b4-Supplemental-Conference.zip › trading_off_resource_budgets_f-Supplementary Material/code_and_data/experiments/base_results/bo_20220228_124924_b7rkpeqg/suggest_log/0b135313106f58a19225cf831b976962.json]

{"meta": {"args": {"--uuid": "0b135313106f58a19225cf831b976962", "-db-root": "/home/damon_falck/blackboxbandits/experiments/saved_results", "--opt-root": "/home/damon_falck/blackboxbandits/experiments", "--data-root": "/home/damon_falck/blackboxbandits/experiments/penn_datasets", "--db": "bo_20220228_124924_b7rkpeqg", "--opt": "Scikit-GP-Hedge", "--data": "clf-krkopt", "--classifier": "lasso", "--metric": "nll", "--calls": 20, "--suggestions": 1, "--jobs-file": null, "--verbose": false, "dry_run": false, "rev": "bd14afd", "opt_rev": "0.9.0"}, "signature": [[{"C": 1.5676677195506077, "intercept_scaling": 7.257005721594282}, {"C": 2.57663857461359, "intercept_scaling": 1.5119336467641016}, {"C": 0.49501595537331966, "intercept_scaling": 3.833332156156665}, {"C": 0.5627932047415171, "intercept_scaling": 36.905577292137636}, {"C": 71.55682161754872, "intercept_scaling": 0.34179529120610125}], [1.7511146999020475, 1.7502983276308703, 1.7582904578090273, 1.7565335293631072, 1.749218322514917]]},
"data": {"coords": {"iter": {"dims": ["iter"], "attrs": {}, "data": [0, 1, 2, 3, 4, 5, 6, 7, 8, 9, 10, 11, 12, 13, 14, 15, 16, 17, 18, 19]}, "suggestion": {"dims": ["suggestion"], "attrs": {}, "data": [0]}}, "attrs": {}, "dims": {"iter": 20, "suggestion": 1}, "data_vars": {"C": {"dims": ["iter", "suggestion"], "attrs": {}, "data": [[14.17353054480147], [1.40925813085364], [4.647564826164655], [0.04957457651524077], [16.317544390719124], [100.0], [45.33630180024899], [94.32492756335145], [0.010002389803633318], [0.3291185776972531], [9.102237998839472], [0.7106230378244495], [25.503365119766986], [15.063733742051987], [0.5163341699010772], [1.8131528974318687], [100.0], [4.4528043378211875], [0.6182849133788227], [4.504426250429443]]}, "intercept_scaling": {"dims": ["iter", "suggestion"], "attrs": {}, "data": [[0.07417502741431153], [0.15143382417758453], [58.6869770990808], [0.03817682383709644], [4.187696858351817], [100.0], [100.0], [0.01009180611049459], [63.01097971454574], [100.0], [96.62274865027489], [89.83878952069286], [100.0], [100.0], [0.01036520943463285], [100.0], [0.568967159384566], [0.01], [3.830649651585772], [1.1227929566305674]]}}}}
