# Supplementary material
Source: ML conference proceedings conference paper supplement (https://proceedings.neurips.cc/paper_files/paper/2022/hash/31a57804448363bcab777f818f75f5b4-Abstract.html)
Supplement: Supplementary file 1 [file 31a57804448363bcab777f818f75f5b4-Supplemental-Conference.zip › trading_off_resource_budgets_f-Supplementary Material/code_and_data/experiments/base_results/bo_20220228_124924_b7rkpeqg/suggest_log/0b353517990a59b098bfafc0f1aae2a5.json]

{"meta": {"args": {"--uuid": "0b353517990a59b098bfafc0f1aae2a5", "-db-root": "/home/damon_falck/blackboxbandits/experiments/saved_results", "--opt-root": "/home/damon_falck/blackboxbandits/experiments", "--data-root": "/home/damon_falck/blackboxbandits/experiments/penn_datasets", "--db": "bo_20220228_124924_b7rkpeqg", "--opt": "OpenTuner-GA", "--data": "clf-krkopt", "--classifier": "MLP-adam", "--metric": "nll", "--calls": 20, "--suggestions": 1, "--jobs-file": null, "--verbose": false, "dry_run": false, "rev": "bd14afd", "opt_rev": "0.8.7"}, "signature": [[{"alpha": 0.019628224813442792, "batch_size": 182, "beta_1": 0.9410202200271762, "beta_2": 0.9998021557676793, "epsilon": 1.8662266976518e-08, "hidden_layer_sizes": 147, "learning_rate_init": 0.0005627932047415167, "tol": 0.03690557729213761, "validation_fraction": 0.8846827852548593}, {"alpha": 0.001998246739232944, "batch_size": 200, "beta_1": 0.919111482530466, "beta_2": 0.9998488260436156, "epsilon": 5.981221901152555e-07, "hidden_layer_sizes": 61, "learning_rate_init": 2.2310905607443014e-05, "tol": 1.2046852412030316e-05, "validation_fraction": 0.8117896445826539}, {"alpha": 0.46659545670218433, "batch_size": 219, "beta_1": 0.9889789783750891, "beta_2": 0.9999896868093284, "epsilon": 2.4234724484675948e-08, "hidden_layer_sizes": 167, "learning_rate_init": 2.972334644335654e-05, "tol": 0.0036281404040243792, "validation_fraction": 0.17260651658522078}, {"alpha": 4.656005689076002, "batch_size": 135, "beta_1": 0.870503881627747, "beta_2": 0.9948873266941017, "epsilon": 2.1023308743480125e-07, "hidden_layer_sizes": 118, "learning_rate_init": 0.001878173875716191, "tol": 1.1889379831773006e-05, "validation_fraction": 0.6264327093752792}, {"alpha": 0.04705159350400542, "batch_size": 158, "beta_1": 0.9870884262730957, "beta_2": 0.9999596874382349, "epsilon": 1.1981845126013875e-08, "hidden_layer_sizes": 116, "learning_rate_init": 0.006173405204074311, "tol": 1.7414134181586194e-05, "validation_fraction": 0.6754299026638921}], [2.1582509728411465, 2.3313502099468293, 2.0044607256605453, 1.9672369580298117, 1.227107206383606]]},
"data": {"coords": {"iter": {"dims": ["iter"], "attrs": {}, "data": [0, 1, 2, 3, 4, 5, 6, 7, 8, 9, 10, 11, 12, 13, 14, 15, 16, 17, 18, 19]}, "suggestion": {"dims": ["suggestion"], "attrs": {}, "data": [0]}}, "attrs": {}, "dims": {"iter": 20, "suggestion": 1}, "data_vars": {"alpha": {"dims": ["iter", "suggestion"], "attrs": {}, "data": [[0.4626946976868637], [0.4626946976868637], [0.015955582217038234], [0.8585283456068334], [0.4626946976868637], [0.47208809562808346], [2.4372936099675164], [0.4626946976868637], [0.4626946976868637], [0.4626946976868637], [1.260897985144918], [0.27771303229151195], [0.27771303229151195], [0.27771303229151195], [0.27771303229151195], [0.27771303229151195], [0.27771303229151195], [4.308478772389427], [5.807985292011773], [0.27771303229151195]]}, "batch_size": {"dims": ["iter", "suggestion"], "attrs": {}, "data": [[204], [204], [155], [63], [204], [142], [207], [185], [204], [105], [30], [204], [204], [22], [143], [204], [204], [204], [204], [204]]}, "beta_1": {"dims": ["iter", "suggestion"], "attrs": {}, "data": [[0.9466496475228637], [0.9466496475228637], [0.6855007702567404], [0.6295637291961494], [0.9466496475228637], [0.501228582395841], [0.8663228745457796], [0.9466496475228637], [0.9466496475228637], [0.9466496475228637], [0.9631253382783844], [0.9466496475228637], [0.9466496475228637], [0.9466496475228637], [0.9466496475228637], [0.9466496475228637], [0.9466496475228637], [0.9466496475228637], [0.9466496475228637], [0.9466496475228637]]}, "beta_2": {"dims": ["iter", "suggestion"], "attrs": {}, "data": [[0.9976830332804144], [0.9976830332804144], [0.9547028557908251], [0.9797763808488074], [0.9976830332804144], [0.9687592978676305], [0.9478919935284105], [0.9976830332804144], [0.993225122650964], [0.9976830332804144], [0.9013104134601161], [0.9976830332804144], [0.9976830332804144], [0.9976830332804144], [0.9976830332804144], [0.9374373505923042], [0.9976830332804144], [0.9976830332804144], [0.9976830332804144], [0.9976830332804144]]}, "epsilon": {"dims": ["iter", "suggestion"], "attrs": {}, "data": [[3.164693795082153e-07], [3.164693795082153e-07], [1.3976813453883585e-07], [1.5477379614101016e-07], [2.942343565742457e-07], [9.857043580535343e-07], [1.2523148798568206e-07], [3.164693795082153e-07], [3.164693795082153e-07], [3.164693795082153e-07], [4.5576143628597756e-07], [7.089505464080426e-07], [7.089505464080426e-07], [7.089505464080426e-07], [7.089505464080426e-07], [7.089505464080426e-07], [4.3628678639326304e-07], [4.3628678639326304e-07], [4.3628678639326304e-07], [4.3628678639326304e-07]]}, "hidden_layer_sizes": {"dims": ["iter", "suggestion"], "attrs": {}, "data": [[170], [170], [197], [138], [170], [200], [103], [170], [170], [170], [110], [170], [63], [170], [170], [170], [170], [170], [170], [170]]}, "learning_rate_init": {"dims": ["iter", "suggestion"], "attrs": {}, "data": [[0.037192011466225576], [0.037192011466225576], [0.09123648478207828], [0.03098432294017377], [0.037192011466225576], [0.06934396855542173], [0.030641659575447223], [0.037192011466225576], [0.037192011466225576], [0.037192011466225576], [0.09022286201645195], [0.037192011466225576], [0.037192011466225576], [0.037192011466225576], [0.037192011466225576], [0.037192011466225576], [0.037192011466225576], [0.037192011466225576], [0.037192011466225576], [0.05692102625355993]]}, "tol": {"dims": ["iter", "suggestion"], "attrs": {}, "data": [[0.03965233290805153], [0.03965233290805153], [0.07604464456036301], [0.01032655769683959], [0.03965233290805153], [0.05483145125740501], [0.016740507608135214], [0.03965233290805153], [0.06438408194368443], [0.03965233290805153], [0.0007625490943651736], [0.03965233290805153], [0.03965233290805153], [0.03965233290805153], [0.03965233290805153], [0.03965233290805153], [0.03965233290805153], [0.03965233290805153], [0.03965233290805153], [0.03965233290805153]]}, "validation_fraction": {"dims": ["iter", "suggestion"], "attrs": {}, "data": [[0.3310520089902228], [0.2048692655327277], [0.4596283703441504], [0.313686490504755], [0.3310520089902228], [0.6317740523882628], [0.6371259996718418], [0.3310520089902228], [0.3310520089902228], [0.3310520089902228], [0.35372135001559823], [0.3310520089902228], [0.3310520089902228], [0.3310520089902228], [0.3310520089902228], [0.3310520089902228], [0.3310520089902228], [0.3310520089902228], [0.3310520089902228], [0.3310520089902228]]}}}}
