# Supplementary material
Source: ML conference proceedings conference paper supplement (https://proceedings.neurips.cc/paper_files/paper/2022/hash/31a57804448363bcab777f818f75f5b4-Abstract.html)
Supplement: Supplementary file 1 [file 31a57804448363bcab777f818f75f5b4-Supplemental-Conference.zip › trading_off_resource_budgets_f-Supplementary Material/code_and_data/experiments/base_results/bo_20220228_124924_b7rkpeqg/suggest_log/0ba6f3f4176b5cbea96fe80bfbaf94d2.json]

{"meta": {"args": {"--uuid": "0ba6f3f4176b5cbea96fe80bfbaf94d2", "-db-root": "/home/damon_falck/blackboxbandits/experiments/saved_results", "--opt-root": "/home/damon_falck/blackboxbandits/experiments", "--data-root": "/home/damon_falck/blackboxbandits/experiments/penn_datasets", "--db": "bo_20220228_124924_b7rkpeqg", "--opt": "RandomSearch", "--data": "clf-solar-flare-2", "--classifier": "MLP-adam", "--metric": "nll", "--calls": 20, "--suggestions": 1, "--jobs-file": null, "--verbose": false, "dry_run": false, "rev": "bd14afd", "opt_rev": "0.0.8"}, "signature": [[{"alpha": 0.019628224813442792, "batch_size": 182, "beta_1": 0.9410202200271762, "beta_2": 0.9998021557676793, "epsilon": 1.8662266976518e-08, "hidden_layer_sizes": 147, "learning_rate_init": 0.0005627932047415167, "tol": 0.03690557729213761, "validation_fraction": 0.8846827852548593}, {"alpha": 0.001998246739232944, "batch_size": 200, "beta_1": 0.919111482530466, "beta_2": 0.9998488260436156, "epsilon": 5.981221901152555e-07, "hidden_layer_sizes": 61, "learning_rate_init": 2.2310905607443014e-05, "tol": 1.2046852412030316e-05, "validation_fraction": 0.8117896445826539}, {"alpha": 0.46659545670218433, "batch_size": 219, "beta_1": 0.9889789783750891, "beta_2": 0.9999896868093284, "epsilon": 2.4234724484675948e-08, "hidden_layer_sizes": 167, "learning_rate_init": 2.972334644335654e-05, "tol": 0.0036281404040243792, "validation_fraction": 0.17260651658522078}, {"alpha": 4.656005689076002, "batch_size": 135, "beta_1": 0.870503881627747, "beta_2": 0.9948873266941017, "epsilon": 2.1023308743480125e-07, "hidden_layer_sizes": 118, "learning_rate_init": 0.001878173875716191, "tol": 1.1889379831773006e-05, "validation_fraction": 0.6264327093752792}, {"alpha": 0.04705159350400542, "batch_size": 158, "beta_1": 0.9870884262730957, "beta_2": 0.9999596874382349, "epsilon": 1.1981845126013875e-08, "hidden_layer_sizes": 116, "learning_rate_init": 0.006173405204074311, "tol": 1.7414134181586194e-05, "validation_fraction": 0.6754299026638921}], [1.3741031004207431, 2.121298865642864, 1.6306315396687334, 0.7550697407253577, 0.806016655151895]]},
"data": {"coords": {"iter": {"dims": ["iter"], "attrs": {}, "data": [0, 1, 2, 3, 4, 5, 6, 7, 8, 9, 10, 11, 12, 13, 14, 15, 16, 17, 18, 19]}, "suggestion": {"dims": ["suggestion"], "attrs": {}, "data": [0]}}, "attrs": {}, "dims": {"iter": 20, "suggestion": 1}, "data_vars": {"alpha": {"dims": ["iter", "suggestion"], "attrs": {}, "data": [[0.03879919706732274], [0.37408288594507516], [0.002059124513238902], [4.806279879791574], [0.008028719645107277], [0.06775343922755614], [0.0029225049502569263], [0.0022885874621148988], [0.0028076711590192807], [0.7674454061655527], [0.00017820452581406704], [0.003027585234115584], [0.4146610513300221], [0.00108514941857762], [0.025485400814486657], [0.092088886720585], [0.02560740036374375], [0.04214038652676349], [0.0002768273494153386], [0.5098601609915899]]}, "batch_size": {"dims": ["iter", "suggestion"], "attrs": {}, "data": [[194], [121], [83], [38], [173], [137], [84], [104], [239], [197], [225], [213], [138], [143], [217], [203], [123], [118], [82], [236]]}, "beta_1": {"dims": ["iter", "suggestion"], "attrs": {}, "data": [[0.9832857121099359], [0.9767475394896189], [0.9884429374096974], [0.8232926438544212], [0.9826494154629792], [0.8614156328297171], [0.9512532236509463], [0.772139429026786], [0.9886380333744366], [0.9545164660947864], [0.864819906173297], [0.5666418009114463], [0.9768683161481244], [0.9498851510869005], [0.9217903730584678], [0.8276638538437788], [0.5705053406807762], [0.856797755754985], [0.9767659072790669], [0.7758447903014873]]}, "beta_2": {"dims": ["iter", "suggestion"], "attrs": {}, "data": [[0.9999948490083653], [0.9999752278107968], [0.99995976934199], [0.9999548916872341], [0.9999398185975881], [0.9929485560355287], [0.9999913416026349], [0.9987233053700085], [0.998195960267279], [0.9993941009299524], [0.9999932939410638], [0.9964686076659283], [0.9232708836617487], [0.9968371923027362], [0.9999489619710684], [0.9922892423688842], [0.9999787269789051], [0.9999984086639905], [0.9996573542827055], [0.9999606606052553]]}, "epsilon": {"dims": ["iter", "suggestion"], "attrs": {}, "data": [[1.8258662667505568e-07], [2.4348305886798937e-07], [1.2348156094706311e-08], [2.4375902431910555e-08], [1.1475934831742307e-08], [1.2322857391447731e-09], [1.019034953839897e-09], [7.682877208322655e-08], [8.07061073404119e-08], [1.0173684869593755e-08], [6.667361071339868e-08], [1.4786754596065564e-07], [1.057203467245115e-08], [1.2439294340973116e-09], [9.932720828822323e-07], [6.541754959336285e-07], [2.0777635611654563e-08], [8.004442673940537e-09], [2.124560176636341e-09], [3.4685894485710587e-07]]}, "hidden_layer_sizes": {"dims": ["iter", "suggestion"], "attrs": {}, "data": [[65], [190], [141], [91], [151], [133], [115], [134], [142], [180], [53], [53], [177], [128], [53], [132], [170], [199], [124], [72]]}, "learning_rate_init": {"dims": ["iter", "suggestion"], "attrs": {}, "data": [[2.5187386147696095e-05], [0.0005537896186961676], [1.4536143383274276e-05], [1.3943454204207718e-05], [0.009443519665723996], [0.004294106233082172], [0.00026630031172553847], [0.07192872135107656], [3.8901610339326895e-05], [0.02721386785924515], [0.002531124975917706], [0.0004735073914986258], [0.08010483906135656], [0.04779348317338128], [0.03584661920407962], [0.009791020221144201], [6.226487383602817e-05], [0.00015089109548860154], [0.0008894321423032146], [0.0032459530623392824]]}, "tol": {"dims": ["iter", "suggestion"], "attrs": {}, "data": [[0.000639579118172167], [0.0021346165447270766], [6.697071113848632e-05], [0.001980243642461953], [0.001589331714321448], [0.020510085529195584], [0.006902812202656443], [0.000282350826431409], [0.002700047057426215], [0.0012269695547956457], [2.665866838257172e-05], [0.0005276715391803787], [0.0010682498854429102], [0.005011194753437939], [0.0031315271948742893], [0.0018008152930663974], [0.030780722996996194], [0.00370925512486264], [0.0008095665925326625], [0.0015477265848447142]]}, "validation_fraction": {"dims": ["iter", "suggestion"], "attrs": {}, "data": [[0.4294262059931097], [0.2612741285752026], [0.7423914211346705], [0.8173695080171324], [0.1911598563224572], [0.7941399925083926], [0.17168549971852926], [0.19910752448918906], [0.4704722112334051], [0.10173668455064869], [0.24752677990972508], [0.6872452089223899], [0.5409005901302768], [0.3620337221103134], [0.8912812264514541], [0.817408097927861], [0.8409042444454757], [0.7514179409197599], [0.22131164552653235], [0.7879000219807463]]}}}}
