# Supplementary material
Source: ML conference proceedings conference paper supplement (https://proceedings.neurips.cc/paper_files/paper/2022/hash/31a57804448363bcab777f818f75f5b4-Abstract.html)
Supplement: Supplementary file 1 [file 31a57804448363bcab777f818f75f5b4-Supplemental-Conference.zip › trading_off_resource_budgets_f-Supplementary Material/code_and_data/experiments/base_results/bo_20220228_124924_b7rkpeqg/suggest_log/0bae4ffb4da35dd180f0e4f31e00e29d.json]

{"meta": {"args": {"--uuid": "0bae4ffb4da35dd180f0e4f31e00e29d", "-db-root": "/home/damon_falck/blackboxbandits/experiments/saved_results", "--opt-root": "/home/damon_falck/blackboxbandits/experiments", "--data-root": "/home/damon_falck/blackboxbandits/experiments/penn_datasets", "--db": "bo_20220228_124924_b7rkpeqg", "--opt": "OpenTuner-GA-DE", "--data": "clf-chess", "--classifier": "MLP-adam", "--metric": "nll", "--calls": 20, "--suggestions": 1, "--jobs-file": null, "--verbose": false, "dry_run": false, "rev": "bd14afd", "opt_rev": "0.8.7"}, "signature": [[{"alpha": 0.019628224813442792, "batch_size": 182, "beta_1": 0.9410202200271762, "beta_2": 0.9998021557676793, "epsilon": 1.8662266976518e-08, "hidden_layer_sizes": 147, "learning_rate_init": 0.0005627932047415167, "tol": 0.03690557729213761, "validation_fraction": 0.8846827852548593}, {"alpha": 0.001998246739232944, "batch_size": 200, "beta_1": 0.919111482530466, "beta_2": 0.9998488260436156, "epsilon": 5.981221901152555e-07, "hidden_layer_sizes": 61, "learning_rate_init": 2.2310905607443014e-05, "tol": 1.2046852412030316e-05, "validation_fraction": 0.8117896445826539}, {"alpha": 0.46659545670218433, "batch_size": 219, "beta_1": 0.9889789783750891, "beta_2": 0.9999896868093284, "epsilon": 2.4234724484675948e-08, "hidden_layer_sizes": 167, "learning_rate_init": 2.972334644335654e-05, "tol": 0.0036281404040243792, "validation_fraction": 0.17260651658522078}, {"alpha": 4.656005689076002, "batch_size": 135, "beta_1": 0.870503881627747, "beta_2": 0.9948873266941017, "epsilon": 2.1023308743480125e-07, "hidden_layer_sizes": 118, "learning_rate_init": 0.001878173875716191, "tol": 1.1889379831773006e-05, "validation_fraction": 0.6264327093752792}, {"alpha": 0.04705159350400542, "batch_size": 158, "beta_1": 0.9870884262730957, "beta_2": 0.9999596874382349, "epsilon": 1.1981845126013875e-08, "hidden_layer_sizes": 116, "learning_rate_init": 0.006173405204074311, "tol": 1.7414134181586194e-05, "validation_fraction": 0.6754299026638921}], [0.5338769013007131, 0.6732979577548193, 0.49487346451578446, 0.17414542694923696, 0.07194796904543344]]},
"data": {"coords": {"iter": {"dims": ["iter"], "attrs": {}, "data": [0, 1, 2, 3, 4, 5, 6, 7, 8, 9, 10, 11, 12, 13, 14, 15, 16, 17, 18, 19]}, "suggestion": {"dims": ["suggestion"], "attrs": {}, "data": [0]}}, "attrs": {}, "dims": {"iter": 20, "suggestion": 1}, "data_vars": {"alpha": {"dims": ["iter", "suggestion"], "attrs": {}, "data": [[1.2097393973762722], [1.6971797225124101], [1.1201015989568646], [1.1201015989568646], [0.002831123809565229], [1.1201015989568646], [0.443065913043207], [9.773054762079944], [1.1201015989568646], [7.471235079820001], [1.6809135127423467], [5.587098336331088], [1.1201015989568646], [0.1658071231671911], [1.1201015989568646], [0.9377838914980471], [1.0106434494421745], [3.3539774482053164], [1.1201015989568646], [2.6062155394029904]]}, "batch_size": {"dims": ["iter", "suggestion"], "attrs": {}, "data": [[223], [223], [194], [194], [194], [194], [224], [17], [194], [59], [194], [182], [194], [28], [194], [194], [194], [191], [194], [130]]}, "beta_1": {"dims": ["iter", "suggestion"], "attrs": {}, "data": [[0.9488779781702219], [0.9154698360065661], [0.9683690852441971], [0.9683690852441971], [0.9683690852441971], [0.9683690852441971], [0.7888645579068333], [0.6616431495004241], [0.5872561329429231], [0.7779468667927643], [0.9683690852441971], [0.8948398140802414], [0.9683690852441971], [0.6661371486235581], [0.9683690852441971], [0.9683690852441971], [0.9683690852441971], [0.7351922391587649], [0.9683690852441971], [0.8773137233775434]]}, "beta_2": {"dims": ["iter", "suggestion"], "attrs": {}, "data": [[0.9624691026191379], [0.9624691026191379], [0.9398509528223215], [0.9398509528223215], [0.9398509528223215], [0.9398509528223215], [0.9220374304392778], [0.9819965936895134], [0.9398509528223215], [0.9964926174597707], [0.9398509528223215], [0.9752649274344414], [0.9398509528223215], [0.9252552909918949], [0.9398509528223215], [0.9547478980224225], [0.9398509528223215], [0.9306533824565445], [0.9398509528223215], [0.9978309748716349]]}, "epsilon": {"dims": ["iter", "suggestion"], "attrs": {}, "data": [[8.367285004278302e-09], [8.367285004278302e-09], [4.519895079607418e-07], [4.519895079607418e-07], [2.814064439857111e-08], [4.519895079607418e-07], [8.507496799542148e-07], [7.306224617814317e-07], [4.519895079607418e-07], [1.0193488578277742e-07], [4.519895079607418e-07], [2.56633139323308e-07], [4.519895079607418e-07], [4.115955602184963e-07], [4.519895079607418e-07], [1.7990297643319286e-07], [4.519895079607418e-07], [5.68812045604299e-07], [4.519895079607418e-07], [7.391555071628298e-07]]}, "hidden_layer_sizes": {"dims": ["iter", "suggestion"], "attrs": {}, "data": [[155], [155], [165], [165], [165], [165], [108], [156], [179], [141], [165], [179], [52], [171], [165], [165], [133], [180], [165], [78]]}, "learning_rate_init": {"dims": ["iter", "suggestion"], "attrs": {}, "data": [[0.01815715659170596], [0.006427076635948371], [0.07068079105618368], [0.07068079105618368], [0.07068079105618368], [0.07068079105618368], [0.06601635964877388], [0.04616222049776935], [0.07068079105618368], [0.08024177137913872], [0.07068079105618368], [0.05434834676235705], [0.07068079105618368], [0.05967083466297501], [0.07068079105618368], [0.07068079105618368], [0.07068079105618368], [0.08301480514188835], [0.07068079105618368], [0.08822372555978146]]}, "tol": {"dims": ["iter", "suggestion"], "attrs": {}, "data": [[0.0498591259848195], [0.0498591259848195], [0.09086410453431919], [0.0297982243019838], [0.0297982243019838], [0.04041681565042093], [0.004560822529026055], [0.09071047128164149], [0.0297982243019838], [0.05191728199196904], [0.0297982243019838], [0.019733855400959555], [0.0297982243019838], [0.012402179537930703], [0.0297982243019838], [0.0297982243019838], [0.0297982243019838], [0.035582434991342886], [0.03959671618094756], [0.029173755386330647]]}, "validation_fraction": {"dims": ["iter", "suggestion"], "attrs": {}, "data": [[0.5523694921518371], [0.38356639238911094], [0.36949290510872446], [0.36949290510872446], [0.36949290510872446], [0.36949290510872446], [0.630204033418875], [0.7186351317034879], [0.36949290510872446], [0.44910377776256594], [0.36949290510872446], [0.41996120788648017], [0.36949290510872446], [0.6171374708627252], [0.35264191044761384], [0.35264191044761384], [0.35264191044761384], [0.2917097900412087], [0.35264191044761384], [0.672007368232874]]}}}}
