# Supplementary material
Source: ML conference proceedings conference paper supplement (https://proceedings.neurips.cc/paper_files/paper/2022/hash/31a57804448363bcab777f818f75f5b4-Abstract.html)
Supplement: Supplementary file 1 [file 31a57804448363bcab777f818f75f5b4-Supplemental-Conference.zip › trading_off_resource_budgets_f-Supplementary Material/code_and_data/experiments/base_results/bo_20220228_124924_b7rkpeqg/suggest_log/0bf960c694495fe790e17db0435289cd.json]

{"meta": {"args": {"--uuid": "0bf960c694495fe790e17db0435289cd", "-db-root": "/home/damon_falck/blackboxbandits/experiments/saved_results", "--opt-root": "/home/damon_falck/blackboxbandits/experiments", "--data-root": "/home/damon_falck/blackboxbandits/experiments/penn_datasets", "--db": "bo_20220228_124924_b7rkpeqg", "--opt": "Scikit-GBRT-Hedge", "--data": "reg-695-chatfield-4", "--classifier": "lasso", "--metric": "mse", "--calls": 20, "--suggestions": 1, "--jobs-file": null, "--verbose": false, "dry_run": false, "rev": "bd14afd", "opt_rev": "0.9.0"}, "signature": [[{"alpha": 1.5676677195506077, "fit_intercept": true, "max_iter": 423, "normalize": true, "positive": false, "tol": 0.0038333321561566623}, {"alpha": 0.5627932047415171, "fit_intercept": true, "max_iter": 3989, "normalize": false, "positive": true, "tol": 0.001304907355036239}, {"alpha": 1.871450068624068, "fit_intercept": true, "max_iter": 16, "normalize": false, "positive": false, "tol": 0.021403233140986057}, {"alpha": 12.960656597279737, "fit_intercept": true, "max_iter": 4378, "normalize": true, "positive": false, "tol": 0.013246974647468445}, {"alpha": 0.029723346443356558, "fit_intercept": true, "max_iter": 24, "normalize": true, "positive": true, "tol": 0.00045566719139214756}], [1.27891133726304, 0.4446868297420277, 1.27891133726304, 1.27891133726304, 0.29688971620938076]]},
"data": {"coords": {"iter": {"dims": ["iter"], "attrs": {}, "data": [0, 1, 2, 3, 4, 5, 6, 7, 8, 9, 10, 11, 12, 13, 14, 15, 16, 17, 18, 19]}, "suggestion": {"dims": ["suggestion"], "attrs": {}, "data": [0]}}, "attrs": {}, "dims": {"iter": 20, "suggestion": 1}, "data_vars": {"alpha": {"dims": ["iter", "suggestion"], "attrs": {}, "data": [[0.6011279753672516], [0.2364721724829045], [30.30415762604587], [15.41705045485821], [20.056692919129514], [0.09403378354108254], [0.011788215634393596], [0.012965891610216017], [0.022108724516324223], [0.014885871727005255], [0.019927941484030206], [0.0584093385277507], [0.1213285721028993], [0.08080393382334072], [0.07621243331257202], [0.09458421256453323], [0.1066145467467505], [0.09532168870626213], [0.09676027791377649], [0.09414462206047473]]}, "fit_intercept": {"dims": ["iter", "suggestion"], "attrs": {}, "data": [[1], [0], [1], [0], [1], [0], [0], [0], [0], [1], [0], [0], [0], [0], [0], [0], [0], [0], [0], [0]]}, "max_iter": {"dims": ["iter", "suggestion"], "attrs": {}, "data": [[2197], [2879], [4603], [4995], [4552], [3150], [3159], [4974], [4189], [4991], [5000], [2700], [2889], [2839], [2870], [3137], [2990], [2966], [3115], [2393]]}, "normalize": {"dims": ["iter", "suggestion"], "attrs": {}, "data": [[1], [1], [0], [0], [0], [0], [0], [1], [1], [1], [1], [1], [1], [0], [1], [1], [1], [1], [1], [1]]}, "positive": {"dims": ["iter", "suggestion"], "attrs": {}, "data": [[1], [1], [0], [0], [0], [1], [0], [1], [1], [0], [1], [1], [0], [1], [1], [1], [1], [0], [0], [0]]}, "tol": {"dims": ["iter", "suggestion"], "attrs": {}, "data": [[8.11749795461552e-05], [3.6619392600251316e-05], [0.0037700866550677095], [1.0264208310989015e-05], [0.00015545111208826703], [0.04163880235553517], [0.017195144113535316], [0.0006672366964055088], [1.2191639014710191e-05], [0.0015232857643457105], [0.001498093236335188], [1.9895545347874784e-05], [3.2771391786783485e-05], [2.05107030179668e-05], [4.668466396089695e-05], [0.0012755977224325596], [3.9646498187776446e-05], [4.963106780834309e-05], [1.4033683624477725e-05], [1.033523887939303e-05]]}}}}
