# Supplementary material
Source: ML conference proceedings conference paper supplement (https://proceedings.neurips.cc/paper_files/paper/2022/hash/31a57804448363bcab777f818f75f5b4-Abstract.html)
Supplement: Supplementary file 1 [file 31a57804448363bcab777f818f75f5b4-Supplemental-Conference.zip › trading_off_resource_budgets_f-Supplementary Material/code_and_data/experiments/base_results/bo_20220228_124924_b7rkpeqg/suggest_log/0c1f0b4e15a558de93bf45a7b9c61253.json]

{"meta": {"args": {"--uuid": "0c1f0b4e15a558de93bf45a7b9c61253", "-db-root": "/home/damon_falck/blackboxbandits/experiments/saved_results", "--opt-root": "/home/damon_falck/blackboxbandits/experiments", "--data-root": "/home/damon_falck/blackboxbandits/experiments/penn_datasets", "--db": "bo_20220228_124924_b7rkpeqg", "--opt": "OpenTuner-GA-DE", "--data": "reg-656-fri-c1-100-5", "--classifier": "lasso", "--metric": "mse", "--calls": 20, "--suggestions": 1, "--jobs-file": null, "--verbose": false, "dry_run": false, "rev": "bd14afd", "opt_rev": "0.8.7"}, "signature": [[{"alpha": 1.5676677195506077, "fit_intercept": true, "max_iter": 423, "normalize": true, "positive": false, "tol": 0.0038333321561566623}, {"alpha": 0.5627932047415171, "fit_intercept": true, "max_iter": 3989, "normalize": false, "positive": true, "tol": 0.001304907355036239}, {"alpha": 1.871450068624068, "fit_intercept": true, "max_iter": 16, "normalize": false, "positive": false, "tol": 0.021403233140986057}, {"alpha": 12.960656597279737, "fit_intercept": true, "max_iter": 4378, "normalize": true, "positive": false, "tol": 0.013246974647468445}, {"alpha": 0.029723346443356558, "fit_intercept": true, "max_iter": 24, "normalize": true, "positive": true, "tol": 0.00045566719139214756}], [0.7919040830976353, 0.7919040830976353, 0.7919040830976353, 0.7919040830976353, 0.7863803875606331]]},
"data": {"coords": {"iter": {"dims": ["iter"], "attrs": {}, "data": [0, 1, 2, 3, 4, 5, 6, 7, 8, 9, 10, 11, 12, 13, 14, 15, 16, 17, 18, 19]}, "suggestion": {"dims": ["suggestion"], "attrs": {}, "data": [0]}}, "attrs": {}, "dims": {"iter": 20, "suggestion": 1}, "data_vars": {"alpha": {"dims": ["iter", "suggestion"], "attrs": {}, "data": [[5.319393943313957], [87.28015232564013], [4.217049088986005], [3.6810564542896005], [8.252954295927722], [5.319393943313957], [5.319393943313957], [5.319393943313957], [36.90838052730173], [1.5734633099094093], [9.045575408257541], [1.0849688505418194], [5.319393943313957], [3.1226097303381186], [58.10306461005776], [5.319393943313957], [5.319393943313957], [4.571433300288439], [5.319393943313957], [0.3779820449454556]]}, "fit_intercept": {"dims": ["iter", "suggestion"], "attrs": {}, "data": [[0], [0], [1], [1], [0], [1], [0], [0], [0], [1], [1], [1], [0], [1], [0], [0], [0], [0], [0], [0]]}, "max_iter": {"dims": ["iter", "suggestion"], "attrs": {}, "data": [[11], [1299], [10], [26], [11], [11], [144], [13], [139], [21], [195], [10], [266], [1315], [60], [24], [11], [550], [11], [687]]}, "normalize": {"dims": ["iter", "suggestion"], "attrs": {}, "data": [[0], [1], [0], [1], [0], [1], [0], [0], [1], [0], [0], [0], [0], [0], [1], [1], [0], [1], [0], [0]]}, "positive": {"dims": ["iter", "suggestion"], "attrs": {}, "data": [[0], [0], [1], [1], [0], [0], [1], [0], [1], [0], [0], [1], [0], [0], [1], [0], [1], [1], [0], [0]]}, "tol": {"dims": ["iter", "suggestion"], "attrs": {}, "data": [[0.054705179469024694], [0.08159661563891156], [0.01885048005797334], [0.03941560351655465], [0.054705179469024694], [0.054705179469024694], [0.054705179469024694], [0.039659739519612484], [0.015177293673080895], [0.04835926567679454], [0.04900932263550766], [0.029115523858235615], [0.054705179469024694], [0.07252663132147268], [0.014118405344992247], [0.030073411219234392], [0.054705179469024694], [0.05258057035494395], [0.05954725868942961], [0.014821709126714367]]}}}}
