# Supplementary material
Source: ML conference proceedings conference paper supplement (https://proceedings.neurips.cc/paper_files/paper/2022/hash/31a57804448363bcab777f818f75f5b4-Abstract.html)
Supplement: Supplementary file 1 [file 31a57804448363bcab777f818f75f5b4-Supplemental-Conference.zip › trading_off_resource_budgets_f-Supplementary Material/code_and_data/experiments/base_results/bo_20220228_124924_b7rkpeqg/suggest_log/0c2bcbe14f1b5d9ca4341653584b73b1.json]

{"meta": {"args": {"--uuid": "0c2bcbe14f1b5d9ca4341653584b73b1", "-db-root": "/home/damon_falck/blackboxbandits/experiments/saved_results", "--opt-root": "/home/damon_falck/blackboxbandits/experiments", "--data-root": "/home/damon_falck/blackboxbandits/experiments/penn_datasets", "--db": "bo_20220228_124924_b7rkpeqg", "--opt": "OpenTuner-GA", "--data": "reg-616-fri-c4-500-50", "--classifier": "lasso", "--metric": "mse", "--calls": 20, "--suggestions": 1, "--jobs-file": null, "--verbose": false, "dry_run": false, "rev": "bd14afd", "opt_rev": "0.8.7"}, "signature": [[{"alpha": 1.5676677195506077, "fit_intercept": true, "max_iter": 423, "normalize": true, "positive": false, "tol": 0.0038333321561566623}, {"alpha": 0.5627932047415171, "fit_intercept": true, "max_iter": 3989, "normalize": false, "positive": true, "tol": 0.001304907355036239}, {"alpha": 1.871450068624068, "fit_intercept": true, "max_iter": 16, "normalize": false, "positive": false, "tol": 0.021403233140986057}, {"alpha": 12.960656597279737, "fit_intercept": true, "max_iter": 4378, "normalize": true, "positive": false, "tol": 0.013246974647468445}, {"alpha": 0.029723346443356558, "fit_intercept": true, "max_iter": 24, "normalize": true, "positive": true, "tol": 0.00045566719139214756}], [0.9653585459180535, 0.9653585459180535, 0.9653585459180535, 0.9653585459180535, 0.9653585459180535]]},
"data": {"coords": {"iter": {"dims": ["iter"], "attrs": {}, "data": [0, 1, 2, 3, 4, 5, 6, 7, 8, 9, 10, 11, 12, 13, 14, 15, 16, 17, 18, 19]}, "suggestion": {"dims": ["suggestion"], "attrs": {}, "data": [0]}}, "attrs": {}, "dims": {"iter": 20, "suggestion": 1}, "data_vars": {"alpha": {"dims": ["iter", "suggestion"], "attrs": {}, "data": [[0.9163481954505703], [32.48954611997425], [23.772466745381635], [10.231022440648392], [23.772466745381635], [23.772466745381635], [23.772466745381635], [33.335584922554986], [23.772466745381635], [1.4362533148406398], [2.5684231835943763], [41.2044257906779], [23.772466745381635], [23.772466745381635], [2.912237996901548], [14.93515613422098], [23.772466745381635], [23.772466745381635], [45.709764903865356], [47.70399850140513]]}, "fit_intercept": {"dims": ["iter", "suggestion"], "attrs": {}, "data": [[0], [0], [1], [1], [1], [0], [1], [0], [1], [1], [0], [1], [1], [1], [1], [0], [1], [1], [0], [1]]}, "max_iter": {"dims": ["iter", "suggestion"], "attrs": {}, "data": [[788], [333], [16], [16], [16], [16], [16], [24], [14], [11], [1285], [42], [16], [16], [36], [11], [3101], [16], [26], [16]]}, "normalize": {"dims": ["iter", "suggestion"], "attrs": {}, "data": [[1], [1], [0], [0], [0], [0], [0], [1], [0], [1], [1], [0], [1], [1], [1], [0], [0], [0], [0], [0]]}, "positive": {"dims": ["iter", "suggestion"], "attrs": {}, "data": [[0], [1], [0], [0], [1], [0], [0], [0], [0], [0], [1], [1], [0], [0], [0], [1], [0], [1], [0], [0]]}, "tol": {"dims": ["iter", "suggestion"], "attrs": {}, "data": [[0.07159271365735324], [0.02648609121233785], [0.014137608036534233], [0.014137608036534233], [0.09719060300820319], [0.014137608036534233], [0.08951796564186958], [0.00801465699238173], [0.014137608036534233], [0.062104411133161834], [0.051518640580825385], [0.028058815485224087], [0.014137608036534233], [0.014137608036534233], [0.030546356856339264], [0.08131602568543965], [0.014137608036534233], [0.014137608036534233], [0.051133604746655674], [0.014137608036534233]]}}}}
