# Supplementary material
Source: ML conference proceedings conference paper supplement (https://proceedings.neurips.cc/paper_files/paper/2022/hash/31a57804448363bcab777f818f75f5b4-Abstract.html)
Supplement: Supplementary file 1 [file 31a57804448363bcab777f818f75f5b4-Supplemental-Conference.zip › trading_off_resource_budgets_f-Supplementary Material/code_and_data/experiments/base_results/bo_20220228_124924_b7rkpeqg/suggest_log/0c3d9caece16507d9549e93b22027e9f.json]

{"meta": {"args": {"--uuid": "0c3d9caece16507d9549e93b22027e9f", "-db-root": "/home/damon_falck/blackboxbandits/experiments/saved_results", "--opt-root": "/home/damon_falck/blackboxbandits/experiments", "--data-root": "/home/damon_falck/blackboxbandits/experiments/penn_datasets", "--db": "bo_20220228_124924_b7rkpeqg", "--opt": "OpenTuner-BanditA", "--data": "clf-analcatdata-lawsuit", "--classifier": "MLP-adam", "--metric": "nll", "--calls": 20, "--suggestions": 1, "--jobs-file": null, "--verbose": false, "dry_run": false, "rev": "bd14afd", "opt_rev": "0.8.7"}, "signature": [[{"alpha": 0.019628224813442792, "batch_size": 182, "beta_1": 0.9410202200271762, "beta_2": 0.9998021557676793, "epsilon": 1.8662266976518e-08, "hidden_layer_sizes": 147, "learning_rate_init": 0.0005627932047415167, "tol": 0.03690557729213761, "validation_fraction": 0.8846827852548593}, {"alpha": 0.001998246739232944, "batch_size": 200, "beta_1": 0.919111482530466, "beta_2": 0.9998488260436156, "epsilon": 5.981221901152555e-07, "hidden_layer_sizes": 61, "learning_rate_init": 2.2310905607443014e-05, "tol": 1.2046852412030316e-05, "validation_fraction": 0.8117896445826539}, {"alpha": 0.46659545670218433, "batch_size": 219, "beta_1": 0.9889789783750891, "beta_2": 0.9999896868093284, "epsilon": 2.4234724484675948e-08, "hidden_layer_sizes": 167, "learning_rate_init": 2.972334644335654e-05, "tol": 0.0036281404040243792, "validation_fraction": 0.17260651658522078}, {"alpha": 4.656005689076002, "batch_size": 135, "beta_1": 0.870503881627747, "beta_2": 0.9948873266941017, "epsilon": 2.1023308743480125e-07, "hidden_layer_sizes": 118, "learning_rate_init": 0.001878173875716191, "tol": 1.1889379831773006e-05, "validation_fraction": 0.6264327093752792}, {"alpha": 0.04705159350400542, "batch_size": 158, "beta_1": 0.9870884262730957, "beta_2": 0.9999596874382349, "epsilon": 1.1981845126013875e-08, "hidden_layer_sizes": 116, "learning_rate_init": 0.006173405204074311, "tol": 1.7414134181586194e-05, "validation_fraction": 0.6754299026638921}], [0.5810472523326535, 0.7943009767972082, 0.7111336190837554, 0.4976363859039988, 0.3931510225940169]]},
"data": {"coords": {"iter": {"dims": ["iter"], "attrs": {}, "data": [0, 1, 2, 3, 4, 5, 6, 7, 8, 9, 10, 11, 12, 13, 14, 15, 16, 17, 18, 19]}, "suggestion": {"dims": ["suggestion"], "attrs": {}, "data": [0]}}, "attrs": {}, "dims": {"iter": 20, "suggestion": 1}, "data_vars": {"alpha": {"dims": ["iter", "suggestion"], "attrs": {}, "data": [[0.03186894254241739], [1.2384423815285346], [1.2384423815285346], [1.2384423815285346], [3.453146317293655], [1.342190365811602], [1.7741661103696735], [6.1213508945966195], [2.328195176743443], [1.8931911747461316], [0.6394573816958372], [0.9564204144628411], [0.7365156538197749], [1.2384423815285346], [1.3027218226643442], [1.192283607959709], [1.1683450429365125], [0.416931582768236], [0.3805576620889301], [0.6830274044305561]]}, "batch_size": {"dims": ["iter", "suggestion"], "attrs": {}, "data": [[100], [51], [51], [51], [63], [120], [119], [21], [82], [47], [244], [25], [51], [51], [12], [230], [138], [94], [165], [195]]}, "beta_1": {"dims": ["iter", "suggestion"], "attrs": {}, "data": [[0.674817890215055], [0.6706028377292349], [0.6706028377292349], [0.6706028377292349], [0.5442256849612835], [0.5742102747840365], [0.7386552570799135], [0.5161196208177451], [0.8327849697862084], [0.6918084159715765], [0.9389224337825928], [0.5012968108787799], [0.6706028377292349], [0.6706028377292349], [0.7049614408694648], [0.912682864644826], [0.8382042320423706], [0.7756635970926382], [0.5644524006445055], [0.6092390290728211]]}, "beta_2": {"dims": ["iter", "suggestion"], "attrs": {}, "data": [[0.948863870626142], [0.9467004922549774], [0.9551722252340378], [0.9467004922549774], [0.9981505907131634], [0.970997954851123], [0.9578570904015289], [0.9700955333758244], [0.920553664275366], [0.9752232303925947], [0.9360094949395097], [0.9302785999755084], [0.9467004922549774], [0.9467004922549774], [0.9194415960308961], [0.9654175035174667], [0.9913152890704815], [0.9688569594561725], [0.9985726955418781], [0.9126177722800104]]}, "epsilon": {"dims": ["iter", "suggestion"], "attrs": {}, "data": [[8.945295834344714e-07], [6.379911198511602e-07], [6.379911198511602e-07], [6.41648139649258e-07], [3.057609324902112e-07], [9.629177361308574e-07], [9.010354765920093e-07], [3.283884556001715e-08], [4.595582826788226e-07], [9.84224001327443e-07], [6.61105580418957e-07], [2.0362056033004682e-07], [6.379911198511602e-07], [6.379911198511602e-07], [3.653082049364921e-07], [6.374628342137024e-07], [7.76805761410453e-07], [9.241585742508485e-07], [4.720619598050269e-08], [4.2350096798923666e-07]]}, "hidden_layer_sizes": {"dims": ["iter", "suggestion"], "attrs": {}, "data": [[163], [117], [117], [128], [128], [93], [172], [156], [98], [142], [168], [70], [117], [183], [167], [136], [192], [195], [158], [169]]}, "learning_rate_init": {"dims": ["iter", "suggestion"], "attrs": {}, "data": [[0.04231879435596502], [0.05969519113799165], [0.05969519113799165], [0.05969519113799165], [0.007457643665311254], [0.05778585097679317], [0.040571628046468904], [0.07358416619640777], [0.046158593307606015], [0.08060760525726256], [0.06855052810650057], [0.06678972850717739], [0.05969519113799165], [0.05969519113799165], [0.04525577418771192], [0.08639501601712], [0.020467400654586344], [0.0629655584129473], [0.020585529747518084], [0.0017466278100503507]]}, "tol": {"dims": ["iter", "suggestion"], "attrs": {}, "data": [[0.07860347358111001], [0.05197669608543192], [0.07491773311280141], [0.053955443082311864], [0.017348693398628146], [0.0698753679433352], [0.029360861833733255], [0.037021712682629486], [0.0421758171473569], [0.013147173539473634], [0.09067444562932596], [0.03083046244902581], [0.05197669608543192], [0.05197669608543192], [0.0739386383761597], [0.015218081049281174], [0.061293231891275494], [0.0325587971593168], [0.022966158781733515], [0.09094682599477848]]}, "validation_fraction": {"dims": ["iter", "suggestion"], "attrs": {}, "data": [[0.466400292666715], [0.4308584613343116], [0.4308584613343116], [0.4308584613343116], [0.710602866460564], [0.11015706054368257], [0.6313067626957435], [0.611035831387526], [0.4306998847581591], [0.5384705696150273], [0.5330198846095174], [0.5261337619628611], [0.49001817564132943], [0.5776791162202782], [0.5651706959517986], [0.2988734211469233], [0.4538836965423223], [0.4757102126719712], [0.47457556075464113], [0.7518758783897849]]}}}}
