# Supplementary material
Source: ML conference proceedings conference paper supplement (https://proceedings.neurips.cc/paper_files/paper/2022/hash/31a57804448363bcab777f818f75f5b4-Abstract.html)
Supplement: Supplementary file 1 [file 31a57804448363bcab777f818f75f5b4-Supplemental-Conference.zip › trading_off_resource_budgets_f-Supplementary Material/code_and_data/experiments/base_results/bo_20220228_124924_b7rkpeqg/suggest_log/00c3efaa9b0c547c989958d01298b65d.json]

{"meta": {"args": {"--uuid": "00c3efaa9b0c547c989958d01298b65d", "-db-root": "/home/damon_falck/blackboxbandits/experiments/saved_results", "--opt-root": "/home/damon_falck/blackboxbandits/experiments", "--data-root": "/home/damon_falck/blackboxbandits/experiments/penn_datasets", "--db": "bo_20220228_124924_b7rkpeqg", "--opt": "RandomSearch", "--data": "clf-analcatdata-happiness", "--classifier": "lasso", "--metric": "nll", "--calls": 20, "--suggestions": 1, "--jobs-file": null, "--verbose": false, "dry_run": false, "rev": "bd14afd", "opt_rev": "0.0.8"}, "signature": [[{"C": 1.5676677195506077, "intercept_scaling": 7.257005721594282}, {"C": 2.57663857461359, "intercept_scaling": 1.5119336467641016}, {"C": 0.49501595537331966, "intercept_scaling": 3.833332156156665}, {"C": 0.5627932047415171, "intercept_scaling": 36.905577292137636}, {"C": 71.55682161754872, "intercept_scaling": 0.34179529120610125}], [1.0462275173080982, 1.122045604883695, 0.955450527897478, 0.9456483611030796, 2.025278326403119]]},
"data": {"coords": {"iter": {"dims": ["iter"], "attrs": {}, "data": [0, 1, 2, 3, 4, 5, 6, 7, 8, 9, 10, 11, 12, 13, 14, 15, 16, 17, 18, 19]}, "suggestion": {"dims": ["suggestion"], "attrs": {}, "data": [0]}}, "attrs": {}, "dims": {"iter": 20, "suggestion": 1}, "data_vars": {"C": {"dims": ["iter", "suggestion"], "attrs": {}, "data": [[0.055129269145803454], [0.9914646285059319], [8.951656412870895], [0.7244548839161162], [0.11242479506263262], [24.83396806059589], [25.172208634854876], [8.677938911590438], [98.99272219505848], [10.361985908535106], [0.2770603037055415], [14.848671318755313], [7.7556132446424115], [0.06847372569647053], [5.703943636593306], [43.25530144558427], [55.22126719638696], [0.014405508579752178], [0.02459498471359623], [2.315447310333083]]}, "intercept_scaling": {"dims": ["iter", "suggestion"], "attrs": {}, "data": [[0.6775310030461602], [1.099972473704419], [0.2102157091176276], [0.01541471266372419], [0.4730297055385435], [0.01575190132440536], [1.2019045199400993], [5.051095404280501], [1.8335421227432462], [27.981105727519182], [29.27258767487129], [5.436149937684155], [0.41851757193147937], [0.21354567783631917], [0.4028991386650114], [24.053690996600317], [56.90566694740973], [0.0910159813387128], [0.22007671710238155], [2.842419810757199]]}}}}
