# Supplementary material
Source: ML conference proceedings conference paper supplement (https://proceedings.neurips.cc/paper_files/paper/2022/hash/31a57804448363bcab777f818f75f5b4-Abstract.html)
Supplement: Supplementary file 1 [file 31a57804448363bcab777f818f75f5b4-Supplemental-Conference.zip › trading_off_resource_budgets_f-Supplementary Material/code_and_data/experiments/base_results/bo_20220228_124924_b7rkpeqg/suggest_log/00c8dec721b15570bfc16ce914488c1a.json]

{"meta": {"args": {"--uuid": "00c8dec721b15570bfc16ce914488c1a", "-db-root": "/home/damon_falck/blackboxbandits/experiments/saved_results", "--opt-root": "/home/damon_falck/blackboxbandits/experiments", "--data-root": "/home/damon_falck/blackboxbandits/experiments/penn_datasets", "--db": "bo_20220228_124924_b7rkpeqg", "--opt": "OpenTuner-BanditA", "--data": "reg-564-fried", "--classifier": "lasso", "--metric": "mse", "--calls": 20, "--suggestions": 1, "--jobs-file": null, "--verbose": false, "dry_run": false, "rev": "bd14afd", "opt_rev": "0.8.7"}, "signature": [[{"alpha": 1.5676677195506077, "fit_intercept": true, "max_iter": 423, "normalize": true, "positive": false, "tol": 0.0038333321561566623}, {"alpha": 0.5627932047415171, "fit_intercept": true, "max_iter": 3989, "normalize": false, "positive": true, "tol": 0.001304907355036239}, {"alpha": 1.871450068624068, "fit_intercept": true, "max_iter": 16, "normalize": false, "positive": false, "tol": 0.021403233140986057}, {"alpha": 12.960656597279737, "fit_intercept": true, "max_iter": 4378, "normalize": true, "positive": false, "tol": 0.013246974647468445}, {"alpha": 0.029723346443356558, "fit_intercept": true, "max_iter": 24, "normalize": true, "positive": true, "tol": 0.00045566719139214756}], [0.9592906973642302, 0.9541910402174525, 0.9592906973642302, 0.9592906973642302, 0.9592906973642302]]},
"data": {"coords": {"iter": {"dims": ["iter"], "attrs": {}, "data": [0, 1, 2, 3, 4, 5, 6, 7, 8, 9, 10, 11, 12, 13, 14, 15, 16, 17, 18, 19]}, "suggestion": {"dims": ["suggestion"], "attrs": {}, "data": [0]}}, "attrs": {}, "dims": {"iter": 20, "suggestion": 1}, "data_vars": {"alpha": {"dims": ["iter", "suggestion"], "attrs": {}, "data": [[30.199634211151125], [30.199634211151125], [0.19861740260295302], [28.04050417742326], [0.19861740260295302], [5.7351085378204605], [0.19861740260295302], [74.29943154560446], [1.6138086974720924], [45.78753842262384], [0.6679118996972337], [8.496901907342524], [0.6437072712585221], [1.2182798155989782], [5.471314694813639], [21.07468239179274], [10.495872290655425], [89.44776927766188], [8.556132481927895], [0.18629554155643824]]}, "fit_intercept": {"dims": ["iter", "suggestion"], "attrs": {}, "data": [[0], [0], [0], [0], [0], [1], [0], [1], [0], [1], [0], [0], [0], [0], [0], [0], [0], [0], [1], [0]]}, "max_iter": {"dims": ["iter", "suggestion"], "attrs": {}, "data": [[25], [25], [25], [47], [25], [19], [25], [480], [25], [21], [25], [82], [3787], [25], [13], [25], [12], [25], [120], [25]]}, "normalize": {"dims": ["iter", "suggestion"], "attrs": {}, "data": [[1], [1], [1], [0], [1], [1], [1], [0], [1], [1], [1], [1], [0], [1], [1], [1], [1], [1], [1], [1]]}, "positive": {"dims": ["iter", "suggestion"], "attrs": {}, "data": [[1], [1], [1], [0], [1], [0], [0], [1], [1], [0], [1], [1], [0], [1], [0], [1], [1], [1], [0], [1]]}, "tol": {"dims": ["iter", "suggestion"], "attrs": {}, "data": [[0.0033580918479633637], [0.013786493772146514], [0.0033580918479633637], [0.051242970719758967], [0.083961165185288], [0.04736116998638112], [0.0033580918479633637], [0.01470365312157378], [0.0033580918479633637], [0.03510489997880189], [0.09488503975441713], [0.09776226309312978], [0.04677810629336759], [0.0033580918479633637], [0.08856770979830612], [0.0033580918479633637], [0.09224043239234729], [0.0033580918479633637], [0.07981086191669344], [0.0033580918479633637]]}}}}
