# Supplementary material
Source: ML conference proceedings conference paper supplement (https://proceedings.neurips.cc/paper_files/paper/2022/hash/31a57804448363bcab777f818f75f5b4-Abstract.html)
Supplement: Supplementary file 1 [file 31a57804448363bcab777f818f75f5b4-Supplemental-Conference.zip › trading_off_resource_budgets_f-Supplementary Material/code_and_data/experiments/base_results/bo_20220228_124924_b7rkpeqg/suggest_log/0c820c301efb5f288a3e101bc5dd7faf.json]

{"meta": {"args": {"--uuid": "0c820c301efb5f288a3e101bc5dd7faf", "-db-root": "/home/damon_falck/blackboxbandits/experiments/saved_results", "--opt-root": "/home/damon_falck/blackboxbandits/experiments", "--data-root": "/home/damon_falck/blackboxbandits/experiments/penn_datasets", "--db": "bo_20220228_124924_b7rkpeqg", "--opt": "Scikit-GP-LCB", "--data": "clf-cleveland-nominal", "--classifier": "lasso", "--metric": "nll", "--calls": 20, "--suggestions": 1, "--jobs-file": null, "--verbose": false, "dry_run": false, "rev": "bd14afd", "opt_rev": "0.9.0"}, "signature": [[{"C": 1.5676677195506077, "intercept_scaling": 7.257005721594282}, {"C": 2.57663857461359, "intercept_scaling": 1.5119336467641016}, {"C": 0.49501595537331966, "intercept_scaling": 3.833332156156665}, {"C": 0.5627932047415171, "intercept_scaling": 36.905577292137636}, {"C": 71.55682161754872, "intercept_scaling": 0.34179529120610125}], [1.1585074635042152, 1.1814273968265494, 1.1064349253472159, 1.1091653735499416, 1.3957889541609156]]},
"data": {"coords": {"iter": {"dims": ["iter"], "attrs": {}, "data": [0, 1, 2, 3, 4, 5, 6, 7, 8, 9, 10, 11, 12, 13, 14, 15, 16, 17, 18, 19]}, "suggestion": {"dims": ["suggestion"], "attrs": {}, "data": [0]}}, "attrs": {}, "dims": {"iter": 20, "suggestion": 1}, "data_vars": {"C": {"dims": ["iter", "suggestion"], "attrs": {}, "data": [[2.3541836669758958], [0.21718337926088366], [3.500392793469589], [1.2378569886503992], [17.094296504292632], [0.01156792563902905], [11.182284739248349], [0.6208282270940338], [100.0], [1.2379737956423378], [0.08432295022463905], [0.05039614332489924], [0.2951789799610968], [0.2236244263845983], [0.1583908449062101], [0.41933386427225233], [0.418302130114784], [100.0], [0.21604905115396203], [0.7517895908303867]]}, "intercept_scaling": {"dims": ["iter", "suggestion"], "attrs": {}, "data": [[0.32971660509243433], [0.24050176335579138], [0.03277813795963527], [5.6168061822811], [0.028156847044508486], [1.5387697593999774], [40.5241916216234], [0.01], [100.0], [5.614406340087769], [86.04928047795222], [0.01], [100.0], [14.527071066446414], [100.0], [27.282850037352134], [3.1872719131640763], [0.01], [40.63052648301807], [100.0]]}}}}
