# Supplementary material
Source: ML conference proceedings conference paper supplement (https://proceedings.neurips.cc/paper_files/paper/2022/hash/31a57804448363bcab777f818f75f5b4-Abstract.html)
Supplement: Supplementary file 1 [file 31a57804448363bcab777f818f75f5b4-Supplemental-Conference.zip › trading_off_resource_budgets_f-Supplementary Material/code_and_data/experiments/base_results/bo_20220228_124924_b7rkpeqg/suggest_log/0c4222baa4e850d6b84bcb6a9cd674eb.json]

{"meta": {"args": {"--uuid": "0c4222baa4e850d6b84bcb6a9cd674eb", "-db-root": "/home/damon_falck/blackboxbandits/experiments/saved_results", "--opt-root": "/home/damon_falck/blackboxbandits/experiments", "--data-root": "/home/damon_falck/blackboxbandits/experiments/penn_datasets", "--db": "bo_20220228_124924_b7rkpeqg", "--opt": "OpenTuner-GA", "--data": "clf-monk1", "--classifier": "lasso", "--metric": "nll", "--calls": 20, "--suggestions": 1, "--jobs-file": null, "--verbose": false, "dry_run": false, "rev": "bd14afd", "opt_rev": "0.8.7"}, "signature": [[{"C": 1.5676677195506077, "intercept_scaling": 7.257005721594282}, {"C": 2.57663857461359, "intercept_scaling": 1.5119336467641016}, {"C": 0.49501595537331966, "intercept_scaling": 3.833332156156665}, {"C": 0.5627932047415171, "intercept_scaling": 36.905577292137636}, {"C": 71.55682161754872, "intercept_scaling": 0.34179529120610125}], [0.5194719151311017, 0.5199611096129373, 0.5172024357958255, 0.5175815181595282, 0.5207439515096057]]},
"data": {"coords": {"iter": {"dims": ["iter"], "attrs": {}, "data": [0, 1, 2, 3, 4, 5, 6, 7, 8, 9, 10, 11, 12, 13, 14, 15, 16, 17, 18, 19]}, "suggestion": {"dims": ["suggestion"], "attrs": {}, "data": [0]}}, "attrs": {}, "dims": {"iter": 20, "suggestion": 1}, "data_vars": {"C": {"dims": ["iter", "suggestion"], "attrs": {}, "data": [[45.25531733284733], [7.9963835555835985], [21.025537692658293], [5.0429431387915855], [10.36633456214213], [28.428721149301342], [13.972066583181475], [8.695292341546548], [5.0429431387915855], [5.0429431387915855], [5.0429431387915855], [5.0429431387915855], [0.8817790500952314], [4.631317980335257], [1.1363713150020633], [55.84973387363274], [4.423995172409366], [69.02482869045717], [0.05106977160564429], [4.795621756737324]]}, "intercept_scaling": {"dims": ["iter", "suggestion"], "attrs": {}, "data": [[7.562991491850836], [24.59428221290165], [24.59428221290165], [17.171049117151824], [91.08648821528914], [17.171049117151824], [17.171049117151824], [80.79299680367188], [55.434802104330856], [55.97174844897351], [1.3180247114810053], [48.25971975629639], [71.1652901099287], [10.703610018723744], [0.3881086812170953], [88.60949111561001], [1.0597742697298125], [0.38542074217359024], [71.1652901099287], [71.1652901099287]]}}}}
