# Supplementary material
Source: ML conference proceedings conference paper supplement (https://proceedings.neurips.cc/paper_files/paper/2022/hash/31a57804448363bcab777f818f75f5b4-Abstract.html)
Supplement: Supplementary file 1 [file 31a57804448363bcab777f818f75f5b4-Supplemental-Conference.zip › trading_off_resource_budgets_f-Supplementary Material/code_and_data/experiments/base_results/bo_20220228_124924_b7rkpeqg/suggest_log/0ca15a845a805278bdf3bde5a34cbd02.json]

{"meta": {"args": {"--uuid": "0ca15a845a805278bdf3bde5a34cbd02", "-db-root": "/home/damon_falck/blackboxbandits/experiments/saved_results", "--opt-root": "/home/damon_falck/blackboxbandits/experiments", "--data-root": "/home/damon_falck/blackboxbandits/experiments/penn_datasets", "--db": "bo_20220228_124924_b7rkpeqg", "--opt": "OpenTuner-GA", "--data": "reg-712-chscase-geyser1", "--classifier": "MLP-adam", "--metric": "mse", "--calls": 20, "--suggestions": 1, "--jobs-file": null, "--verbose": false, "dry_run": false, "rev": "bd14afd", "opt_rev": "0.8.7"}, "signature": [[{"alpha": 0.019628224813442792, "batch_size": 182, "beta_1": 0.9410202200271762, "beta_2": 0.9998021557676793, "epsilon": 1.8662266976518e-08, "hidden_layer_sizes": 147, "learning_rate_init": 0.0005627932047415167, "tol": 0.03690557729213761, "validation_fraction": 0.8846827852548593}, {"alpha": 0.001998246739232944, "batch_size": 200, "beta_1": 0.919111482530466, "beta_2": 0.9998488260436156, "epsilon": 5.981221901152555e-07, "hidden_layer_sizes": 61, "learning_rate_init": 2.2310905607443014e-05, "tol": 1.2046852412030316e-05, "validation_fraction": 0.8117896445826539}, {"alpha": 0.46659545670218433, "batch_size": 219, "beta_1": 0.9889789783750891, "beta_2": 0.9999896868093284, "epsilon": 2.4234724484675948e-08, "hidden_layer_sizes": 167, "learning_rate_init": 2.972334644335654e-05, "tol": 0.0036281404040243792, "validation_fraction": 0.17260651658522078}, {"alpha": 4.656005689076002, "batch_size": 135, "beta_1": 0.870503881627747, "beta_2": 0.9948873266941017, "epsilon": 2.1023308743480125e-07, "hidden_layer_sizes": 118, "learning_rate_init": 0.001878173875716191, "tol": 1.1889379831773006e-05, "validation_fraction": 0.6264327093752792}, {"alpha": 0.04705159350400542, "batch_size": 158, "beta_1": 0.9870884262730957, "beta_2": 0.9999596874382349, "epsilon": 1.1981845126013875e-08, "hidden_layer_sizes": 116, "learning_rate_init": 0.006173405204074311, "tol": 1.7414134181586194e-05, "validation_fraction": 0.6754299026638921}], [0.9137566099696576, 1.0107657544065176, 1.3187949438804332, 0.2765088204545568, 0.38649829106095596]]},
"data": {"coords": {"iter": {"dims": ["iter"], "attrs": {}, "data": [0, 1, 2, 3, 4, 5, 6, 7, 8, 9, 10, 11, 12, 13, 14, 15, 16, 17, 18, 19]}, "suggestion": {"dims": ["suggestion"], "attrs": {}, "data": [0]}}, "attrs": {}, "dims": {"iter": 20, "suggestion": 1}, "data_vars": {"alpha": {"dims": ["iter", "suggestion"], "attrs": {}, "data": [[0.06772142111118999], [4.0820059171012275], [0.8514011272286514], [0.5699116435424622], [0.06772142111118999], [0.06772142111118999], [3.0302302895746878], [0.8640987258240788], [0.06772142111118999], [0.23029197573177868], [0.06772142111118999], [0.06772142111118999], [0.06772142111118999], [0.06772142111118999], [0.06772142111118999], [0.06772142111118999], [0.06772142111118999], [0.06772142111118999], [0.06772142111118999], [1.0238752822376105]]}, "batch_size": {"dims": ["iter", "suggestion"], "attrs": {}, "data": [[32], [233], [122], [169], [32], [32], [62], [32], [32], [29], [32], [159], [99], [32], [32], [32], [32], [32], [32], [32]]}, "beta_1": {"dims": ["iter", "suggestion"], "attrs": {}, "data": [[0.8207701246956944], [0.6214027400295113], [0.6428998417288678], [0.5608881726273794], [0.8207701246956944], [0.8207701246956944], [0.5242310117148588], [0.8207701246956944], [0.8207701246956944], [0.8253267805274573], [0.8207701246956944], [0.8207701246956944], [0.8207701246956944], [0.8207701246956944], [0.8207701246956944], [0.8207701246956944], [0.8207701246956944], [0.8207701246956944], [0.8207701246956944], [0.8207701246956944]]}, "beta_2": {"dims": ["iter", "suggestion"], "attrs": {}, "data": [[0.9158043412689145], [0.9086561577526322], [0.9320849855067664], [0.9342876382572927], [0.9158043412689145], [0.9158043412689145], [0.9561117321549842], [0.9158043412689145], [0.9158043412689145], [0.9997360929952065], [0.9158043412689145], [0.9158043412689145], [0.9158043412689145], [0.9158043412689145], [0.9158043412689145], [0.9158043412689145], [0.9158043412689145], [0.9158043412689145], [0.9158043412689145], [0.9158043412689145]]}, "epsilon": {"dims": ["iter", "suggestion"], "attrs": {}, "data": [[9.621434297340794e-07], [2.1104617889452959e-07], [7.213974292657733e-07], [9.793839527433003e-07], [9.621434297340794e-07], [9.621434297340794e-07], [4.685543550103356e-07], [9.621434297340794e-07], [9.153757542240394e-07], [3.2136689079362193e-07], [9.621434297340794e-07], [9.621434297340794e-07], [9.621434297340794e-07], [4.942451032301619e-09], [9.621434297340794e-07], [9.621434297340794e-07], [9.621434297340794e-07], [9.621434297340794e-07], [9.621434297340794e-07], [9.621434297340794e-07]]}, "hidden_layer_sizes": {"dims": ["iter", "suggestion"], "attrs": {}, "data": [[181], [94], [135], [143], [181], [50], [150], [181], [181], [177], [181], [181], [181], [181], [181], [119], [171], [109], [109], [181]]}, "learning_rate_init": {"dims": ["iter", "suggestion"], "attrs": {}, "data": [[0.01994095344707174], [0.05347752396805976], [0.03237794299007473], [0.018572073986041483], [0.01994095344707174], [0.01994095344707174], [0.022023374404860286], [0.01994095344707174], [0.01994095344707174], [0.04493545040631546], [0.01994095344707174], [0.01994095344707174], [0.01994095344707174], [0.01994095344707174], [0.01994095344707174], [0.01994095344707174], [0.01994095344707174], [0.01994095344707174], [0.01994095344707174], [0.01994095344707174]]}, "tol": {"dims": ["iter", "suggestion"], "attrs": {}, "data": [[0.03519763977947459], [0.0665237684660253], [0.09738016358146544], [0.07307860046965857], [0.03519763977947459], [0.03519763977947459], [0.04056638431482112], [0.03519763977947459], [0.03519763977947459], [0.0016111330955225667], [0.03519763977947459], [0.03519763977947459], [0.03519763977947459], [0.03519763977947459], [0.03519763977947459], [0.03519763977947459], [0.03519763977947459], [0.03519763977947459], [0.03519763977947459], [0.03519763977947459]]}, "validation_fraction": {"dims": ["iter", "suggestion"], "attrs": {}, "data": [[0.11072971922125721], [0.6498749078577504], [0.24776796397619638], [0.19129041560414697], [0.8718076006483746], [0.11072971922125721], [0.8561520107207641], [0.11072971922125721], [0.11072971922125721], [0.7230005804683944], [0.4045791687201543], [0.4045791687201543], [0.4045791687201543], [0.4045791687201543], [0.7943940197816429], [0.4045791687201543], [0.4045791687201543], [0.4045791687201543], [0.4045791687201543], [0.4045791687201543]]}}}}
