# Supplementary material
Source: ML conference proceedings conference paper supplement (https://proceedings.neurips.cc/paper_files/paper/2022/hash/31a57804448363bcab777f818f75f5b4-Abstract.html)
Supplement: Supplementary file 1 [file 31a57804448363bcab777f818f75f5b4-Supplemental-Conference.zip › trading_off_resource_budgets_f-Supplementary Material/code_and_data/experiments/base_results/bo_20220228_124924_b7rkpeqg/suggest_log/0caf6d60dcd55d9d82726e3dc01dc8f0.json]

{"meta": {"args": {"--uuid": "0caf6d60dcd55d9d82726e3dc01dc8f0", "-db-root": "/home/damon_falck/blackboxbandits/experiments/saved_results", "--opt-root": "/home/damon_falck/blackboxbandits/experiments", "--data-root": "/home/damon_falck/blackboxbandits/experiments/penn_datasets", "--db": "bo_20220228_124924_b7rkpeqg", "--opt": "OpenTuner-GA", "--data": "reg-230-machine-cpu", "--classifier": "MLP-adam", "--metric": "mse", "--calls": 20, "--suggestions": 1, "--jobs-file": null, "--verbose": false, "dry_run": false, "rev": "bd14afd", "opt_rev": "0.8.7"}, "signature": [[{"alpha": 0.019628224813442792, "batch_size": 182, "beta_1": 0.9410202200271762, "beta_2": 0.9998021557676793, "epsilon": 1.8662266976518e-08, "hidden_layer_sizes": 147, "learning_rate_init": 0.0005627932047415167, "tol": 0.03690557729213761, "validation_fraction": 0.8846827852548593}, {"alpha": 0.001998246739232944, "batch_size": 200, "beta_1": 0.919111482530466, "beta_2": 0.9998488260436156, "epsilon": 5.981221901152555e-07, "hidden_layer_sizes": 61, "learning_rate_init": 2.2310905607443014e-05, "tol": 1.2046852412030316e-05, "validation_fraction": 0.8117896445826539}, {"alpha": 0.46659545670218433, "batch_size": 219, "beta_1": 0.9889789783750891, "beta_2": 0.9999896868093284, "epsilon": 2.4234724484675948e-08, "hidden_layer_sizes": 167, "learning_rate_init": 2.972334644335654e-05, "tol": 0.0036281404040243792, "validation_fraction": 0.17260651658522078}, {"alpha": 4.656005689076002, "batch_size": 135, "beta_1": 0.870503881627747, "beta_2": 0.9948873266941017, "epsilon": 2.1023308743480125e-07, "hidden_layer_sizes": 118, "learning_rate_init": 0.001878173875716191, "tol": 1.1889379831773006e-05, "validation_fraction": 0.6264327093752792}, {"alpha": 0.04705159350400542, "batch_size": 158, "beta_1": 0.9870884262730957, "beta_2": 0.9999596874382349, "epsilon": 1.1981845126013875e-08, "hidden_layer_sizes": 116, "learning_rate_init": 0.006173405204074311, "tol": 1.7414134181586194e-05, "validation_fraction": 0.6754299026638921}], [1.2278865656786386, 3.32091597543832, 2.7682026516517717, 0.7243390018250118, 0.5445361769018942]]},
"data": {"coords": {"iter": {"dims": ["iter"], "attrs": {}, "data": [0, 1, 2, 3, 4, 5, 6, 7, 8, 9, 10, 11, 12, 13, 14, 15, 16, 17, 18, 19]}, "suggestion": {"dims": ["suggestion"], "attrs": {}, "data": [0]}}, "attrs": {}, "dims": {"iter": 20, "suggestion": 1}, "data_vars": {"alpha": {"dims": ["iter", "suggestion"], "attrs": {}, "data": [[0.929132751099906], [0.929132751099906], [2.2776832891688352], [2.2776832891688352], [2.2776832891688352], [2.2776832891688352], [1.9690797146833425], [5.598422343128462], [2.2776832891688352], [0.25015441667140886], [0.25015441667140886], [0.25015441667140886], [2.702316340820365], [8.510686075152844], [1.1618845775676365], [3.967649170964506], [0.2214267029582619], [0.25015441667140886], [2.4436175750137896], [5.075743439552945]]}, "batch_size": {"dims": ["iter", "suggestion"], "attrs": {}, "data": [[214], [182], [91], [91], [91], [91], [192], [192], [91], [201], [201], [201], [120], [96], [246], [112], [208], [90], [110], [171]]}, "beta_1": {"dims": ["iter", "suggestion"], "attrs": {}, "data": [[0.946761225544638], [0.946761225544638], [0.8674330196188804], [0.8674330196188804], [0.8674330196188804], [0.8674330196188804], [0.5695715156545273], [0.7907700794504562], [0.8674330196188804], [0.6601509553811677], [0.6601509553811677], [0.6601509553811677], [0.9303238693026123], [0.6550078907801519], [0.5747035882236502], [0.533729746218299], [0.7941256899572241], [0.6601509553811677], [0.5429619252769404], [0.7162200643124111]]}, "beta_2": {"dims": ["iter", "suggestion"], "attrs": {}, "data": [[0.9658398107322637], [0.9658398107322637], [0.9658313482526648], [0.9658313482526648], [0.9658313482526648], [0.9658313482526648], [0.9305269337774482], [0.9500426483054443], [0.9658313482526648], [0.9465130497684611], [0.9465130497684611], [0.9465130497684611], [0.9064118345202011], [0.9414580940342393], [0.9307972432572696], [0.9553437295951485], [0.9961050461013664], [0.9465130497684611], [0.9924987685944371], [0.9363253178889611]]}, "epsilon": {"dims": ["iter", "suggestion"], "attrs": {}, "data": [[9.534138551153527e-07], [9.534138551153527e-07], [3.3422641979083303e-07], [3.3422641979083303e-07], [3.3422641979083303e-07], [3.3422641979083303e-07], [1.3424591896513027e-07], [5.117070228937971e-07], [3.3422641979083303e-07], [5.790431633350957e-07], [5.790431633350957e-07], [5.790431633350957e-07], [6.122288666315635e-07], [2.9584673547131026e-07], [5.32573442597022e-07], [1.3031411208505494e-07], [1.186837718386281e-07], [5.790431633350957e-07], [2.2106153677089912e-07], [8.418313312280313e-07]]}, "hidden_layer_sizes": {"dims": ["iter", "suggestion"], "attrs": {}, "data": [[182], [182], [135], [135], [135], [135], [115], [119], [164], [193], [193], [156], [115], [93], [164], [192], [178], [193], [55], [133]]}, "learning_rate_init": {"dims": ["iter", "suggestion"], "attrs": {}, "data": [[0.05389861857565486], [0.05389861857565486], [0.029904347503817808], [0.029904347503817808], [0.029904347503817808], [0.029904347503817808], [0.0835059941209945], [0.0875983323306188], [0.029904347503817808], [0.05025049506078932], [0.08472602350150298], [0.05025049506078932], [0.0028338212858149314], [0.09309514100746157], [0.003598765867762689], [0.0665351318018214], [0.08386362016747888], [0.05025049506078932], [0.0496968360574172], [0.020290738259264907]]}, "tol": {"dims": ["iter", "suggestion"], "attrs": {}, "data": [[0.05315572667963691], [0.05315572667963691], [0.08973450381338781], [0.05402062941512547], [0.08973450381338781], [0.08973450381338781], [0.026825211100607472], [0.0808465559183799], [0.07948558805066856], [0.00011426948829178606], [0.00011426948829178606], [0.00011426948829178606], [0.04219966072075059], [0.09058059713319182], [0.08093836191386543], [0.05468760871522032], [0.051974336218698784], [0.00011426948829178606], [0.041324123819383045], [0.08680445424046528]]}, "validation_fraction": {"dims": ["iter", "suggestion"], "attrs": {}, "data": [[0.3989811891557479], [0.3989811891557479], [0.6871973112663867], [0.6871973112663867], [0.7542006064873337], [0.7337039025529505], [0.22363964436814288], [0.46315684241058075], [0.6871973112663867], [0.36939367278073665], [0.36939367278073665], [0.36939367278073665], [0.7879977413617393], [0.6141372034001745], [0.2908074484837575], [0.10418512220925571], [0.2214833907141217], [0.36939367278073665], [0.6683596700248352], [0.561228262684842]]}}}}
