# Supplementary material
Source: ML conference proceedings conference paper supplement (https://proceedings.neurips.cc/paper_files/paper/2022/hash/31a57804448363bcab777f818f75f5b4-Abstract.html)
Supplement: Supplementary file 1 [file 31a57804448363bcab777f818f75f5b4-Supplemental-Conference.zip › trading_off_resource_budgets_f-Supplementary Material/code_and_data/experiments/base_results/bo_20220228_124924_b7rkpeqg/suggest_log/0cbc9bb6dab5567193603183ea827628.json]

{"meta": {"args": {"--uuid": "0cbc9bb6dab5567193603183ea827628", "-db-root": "/home/damon_falck/blackboxbandits/experiments/saved_results", "--opt-root": "/home/damon_falck/blackboxbandits/experiments", "--data-root": "/home/damon_falck/blackboxbandits/experiments/penn_datasets", "--db": "bo_20220228_124924_b7rkpeqg", "--opt": "OpenTuner-GA-DE", "--data": "reg-542-pollution", "--classifier": "lasso", "--metric": "mse", "--calls": 20, "--suggestions": 1, "--jobs-file": null, "--verbose": false, "dry_run": false, "rev": "bd14afd", "opt_rev": "0.8.7"}, "signature": [[{"alpha": 1.5676677195506077, "fit_intercept": true, "max_iter": 423, "normalize": true, "positive": false, "tol": 0.0038333321561566623}, {"alpha": 0.5627932047415171, "fit_intercept": true, "max_iter": 3989, "normalize": false, "positive": true, "tol": 0.001304907355036239}, {"alpha": 1.871450068624068, "fit_intercept": true, "max_iter": 16, "normalize": false, "positive": false, "tol": 0.021403233140986057}, {"alpha": 12.960656597279737, "fit_intercept": true, "max_iter": 4378, "normalize": true, "positive": false, "tol": 0.013246974647468445}, {"alpha": 0.029723346443356558, "fit_intercept": true, "max_iter": 24, "normalize": true, "positive": true, "tol": 0.00045566719139214756}], [1.2509137901459315, 1.0630875624207263, 1.2509137901459315, 1.2509137901459315, 0.700734037992276]]},
"data": {"coords": {"iter": {"dims": ["iter"], "attrs": {}, "data": [0, 1, 2, 3, 4, 5, 6, 7, 8, 9, 10, 11, 12, 13, 14, 15, 16, 17, 18, 19]}, "suggestion": {"dims": ["suggestion"], "attrs": {}, "data": [0]}}, "attrs": {}, "dims": {"iter": 20, "suggestion": 1}, "data_vars": {"alpha": {"dims": ["iter", "suggestion"], "attrs": {}, "data": [[68.47524648962236], [8.165828692333486], [2.4619426846714965], [11.877921066932501], [8.165828692333486], [25.912285934889464], [61.160527612663714], [7.733183656669739], [4.970597694594114], [30.430798480270187], [8.294875862255557], [8.165828692333486], [8.165828692333486], [17.06779312525857], [4.553817886195327], [25.78436537859233], [10.541007582942674], [32.96238441589608], [6.460363086558288], [8.165828692333486]]}, "fit_intercept": {"dims": ["iter", "suggestion"], "attrs": {}, "data": [[1], [0], [1], [1], [0], [1], [0], [0], [0], [0], [0], [0], [0], [1], [0], [1], [0], [1], [0], [0]]}, "max_iter": {"dims": ["iter", "suggestion"], "attrs": {}, "data": [[2196], [36], [38], [10], [10], [26], [412], [36], [36], [18], [1253], [98], [36], [10], [36], [711], [92], [24], [36], [475]]}, "normalize": {"dims": ["iter", "suggestion"], "attrs": {}, "data": [[0], [1], [0], [0], [1], [1], [1], [1], [1], [0], [0], [1], [1], [1], [1], [0], [0], [0], [1], [1]]}, "positive": {"dims": ["iter", "suggestion"], "attrs": {}, "data": [[0], [0], [0], [0], [0], [0], [0], [0], [0], [0], [0], [0], [0], [1], [0], [1], [0], [1], [1], [0]]}, "tol": {"dims": ["iter", "suggestion"], "attrs": {}, "data": [[0.07928874826416503], [0.03737741400485322], [0.07547218071020804], [0.02384898684513208], [0.03737741400485322], [0.04212500923430811], [0.03737741400485322], [0.03737741400485322], [0.03737741400485322], [0.07308229099239798], [0.003797852795556157], [0.03737741400485322], [0.03247978598323747], [0.06387153624300927], [0.03229471334451544], [0.08796255059873774], [0.0659524232989727], [0.09401263530358255], [0.0976336021850021], [0.03737741400485322]]}}}}
