# Supplementary material
Source: ML conference proceedings conference paper supplement (https://proceedings.neurips.cc/paper_files/paper/2022/hash/31a57804448363bcab777f818f75f5b4-Abstract.html)
Supplement: Supplementary file 1 [file 31a57804448363bcab777f818f75f5b4-Supplemental-Conference.zip › trading_off_resource_budgets_f-Supplementary Material/code_and_data/experiments/base_results/bo_20220228_124924_b7rkpeqg/suggest_log/0cde1abec9085f20ab57a006814413e1.json]

{"meta": {"args": {"--uuid": "0cde1abec9085f20ab57a006814413e1", "-db-root": "/home/damon_falck/blackboxbandits/experiments/saved_results", "--opt-root": "/home/damon_falck/blackboxbandits/experiments", "--data-root": "/home/damon_falck/blackboxbandits/experiments/penn_datasets", "--db": "bo_20220228_124924_b7rkpeqg", "--opt": "OpenTuner-GA", "--data": "clf-mfeat-zernike", "--classifier": "lasso", "--metric": "nll", "--calls": 20, "--suggestions": 1, "--jobs-file": null, "--verbose": false, "dry_run": false, "rev": "bd14afd", "opt_rev": "0.8.7"}, "signature": [[{"C": 1.5676677195506077, "intercept_scaling": 7.257005721594282}, {"C": 2.57663857461359, "intercept_scaling": 1.5119336467641016}, {"C": 0.49501595537331966, "intercept_scaling": 3.833332156156665}, {"C": 0.5627932047415171, "intercept_scaling": 36.905577292137636}, {"C": 71.55682161754872, "intercept_scaling": 0.34179529120610125}], [0.44716784523163833, 0.44151634159008735, 0.49248372695246745, 0.4818797958138522, 0.575526374481101]]},
"data": {"coords": {"iter": {"dims": ["iter"], "attrs": {}, "data": [0, 1, 2, 3, 4, 5, 6, 7, 8, 9, 10, 11, 12, 13, 14, 15, 16, 17, 18, 19]}, "suggestion": {"dims": ["suggestion"], "attrs": {}, "data": [0]}}, "attrs": {}, "dims": {"iter": 20, "suggestion": 1}, "data_vars": {"C": {"dims": ["iter", "suggestion"], "attrs": {}, "data": [[58.39972164729015], [1.7786568026022278], [20.671437310853765], [1.7786568026022278], [0.18754994197709496], [20.696845526544195], [0.6065181333213121], [1.7786568026022278], [1.7786568026022278], [1.7786568026022278], [1.7786568026022278], [12.478733858877483], [35.67026301527727], [29.11527694715644], [9.86531348391452], [42.001842408885125], [8.83702299156019], [89.17966270674168], [11.290262712987804], [0.3217819723625921]]}, "intercept_scaling": {"dims": ["iter", "suggestion"], "attrs": {}, "data": [[1.223814914782442], [48.6356449879462], [20.73386772697594], [22.551903768778896], [22.551903768778896], [3.7941264646512476], [29.152846693716647], [9.34121758153254], [2.3876963643024576], [7.681414931947721], [24.762268322641315], [4.969793297569458], [22.551903768778896], [4.975183617125286], [22.551903768778896], [25.490344983657163], [5.175718708763065], [15.292718223443698], [22.551903768778896], [76.00264938846145]]}}}}
