# Supplementary material
Source: ML conference proceedings conference paper supplement (https://proceedings.neurips.cc/paper_files/paper/2022/hash/31a57804448363bcab777f818f75f5b4-Abstract.html)
Supplement: Supplementary file 1 [file 31a57804448363bcab777f818f75f5b4-Supplemental-Conference.zip › trading_off_resource_budgets_f-Supplementary Material/code_and_data/experiments/base_results/bo_20220228_124924_b7rkpeqg/suggest_log/0ce11a63bc4e573489c274f42bd1667f.json]

{"meta": {"args": {"--uuid": "0ce11a63bc4e573489c274f42bd1667f", "-db-root": "/home/damon_falck/blackboxbandits/experiments/saved_results", "--opt-root": "/home/damon_falck/blackboxbandits/experiments", "--data-root": "/home/damon_falck/blackboxbandits/experiments/penn_datasets", "--db": "bo_20220228_124924_b7rkpeqg", "--opt": "HyperOpt", "--data": "clf-iris", "--classifier": "MLP-adam", "--metric": "nll", "--calls": 20, "--suggestions": 1, "--jobs-file": null, "--verbose": false, "dry_run": false, "rev": "bd14afd", "opt_rev": "0.2.7"}, "signature": [[{"alpha": 0.019628224813442792, "batch_size": 182, "beta_1": 0.9410202200271762, "beta_2": 0.9998021557676793, "epsilon": 1.8662266976518e-08, "hidden_layer_sizes": 147, "learning_rate_init": 0.0005627932047415167, "tol": 0.03690557729213761, "validation_fraction": 0.8846827852548593}, {"alpha": 0.001998246739232944, "batch_size": 200, "beta_1": 0.919111482530466, "beta_2": 0.9998488260436156, "epsilon": 5.981221901152555e-07, "hidden_layer_sizes": 61, "learning_rate_init": 2.2310905607443014e-05, "tol": 1.2046852412030316e-05, "validation_fraction": 0.8117896445826539}, {"alpha": 0.46659545670218433, "batch_size": 219, "beta_1": 0.9889789783750891, "beta_2": 0.9999896868093284, "epsilon": 2.4234724484675948e-08, "hidden_layer_sizes": 167, "learning_rate_init": 2.972334644335654e-05, "tol": 0.0036281404040243792, "validation_fraction": 0.17260651658522078}, {"alpha": 4.656005689076002, "batch_size": 135, "beta_1": 0.870503881627747, "beta_2": 0.9948873266941017, "epsilon": 2.1023308743480125e-07, "hidden_layer_sizes": 118, "learning_rate_init": 0.001878173875716191, "tol": 1.1889379831773006e-05, "validation_fraction": 0.6264327093752792}, {"alpha": 0.04705159350400542, "batch_size": 158, "beta_1": 0.9870884262730957, "beta_2": 0.9999596874382349, "epsilon": 1.1981845126013875e-08, "hidden_layer_sizes": 116, "learning_rate_init": 0.006173405204074311, "tol": 1.7414134181586194e-05, "validation_fraction": 0.6754299026638921}], [1.0251570857987358, 1.2417078825968686, 1.081362803598507, 0.6042972757729964, 0.3608661723016464]]},
"data": {"coords": {"iter": {"dims": ["iter"], "attrs": {}, "data": [0, 1, 2, 3, 4, 5, 6, 7, 8, 9, 10, 11, 12, 13, 14, 15, 16, 17, 18, 19]}, "suggestion": {"dims": ["suggestion"], "attrs": {}, "data": [0]}}, "attrs": {}, "dims": {"iter": 20, "suggestion": 1}, "data_vars": {"alpha": {"dims": ["iter", "suggestion"], "attrs": {}, "data": [[0.06890392135304678], [0.0024368731495264116], [1.5348594973218601], [5.351315639384639], [0.002726680937347428], [2.385038785813927e-05], [0.0004579461515756427], [0.00010074304124847906], [0.24636305018535873], [0.03889322957529986], [0.00028500055755384157], [0.1808817675550879], [1.7800002499674783], [0.003630553782837571], [0.06798013652248598], [0.31558597148190004], [0.015360368911970882], [7.632516729479918], [0.018859005339333434], [4.316133596728709e-05]]}, "batch_size": {"dims": ["iter", "suggestion"], "attrs": {}, "data": [[217], [28], [223], [230], [42], [97], [63], [243], [15], [226], [202], [101], [95], [131], [197], [159], [206], [41], [199], [150]]}, "beta_1": {"dims": ["iter", "suggestion"], "attrs": {}, "data": [[0.5474124310534121], [0.8324339389248373], [0.6643578096131827], [0.7888380122691412], [0.8997478461946277], [0.731891375238493], [0.5234042180614837], [0.6901708058491227], [0.5508120022073185], [0.919988184331844], [0.6313426106713373], [0.6743387338691272], [0.9067091724079743], [0.7596796997405875], [0.5633086568245761], [0.619924963813627], [0.6933126150488206], [0.5079837109855155], [0.7277360235537074], [0.5156606977944406]]}, "beta_2": {"dims": ["iter", "suggestion"], "attrs": {}, "data": [[0.9518167105017216], [0.9124780513147894], [0.9191699612108615], [0.9719022915282274], [0.942230731440032], [0.930704793760463], [0.9879483536039751], [0.9284850572644736], [0.929284778994034], [0.9438773077869069], [0.9928124656059306], [0.9714477814384305], [0.9300472571143843], [0.9780480487762968], [0.9758464539274635], [0.9511088832978503], [0.9703578162462659], [0.9285814224167019], [0.9071293562548453], [0.9272411439373603]]}, "epsilon": {"dims": ["iter", "suggestion"], "attrs": {}, "data": [[1.215130462001269e-07], [3.1120741092043377e-07], [1.1868666636563739e-08], [2.9730868084203798e-08], [1.0659861290755648e-07], [4.041925407005218e-08], [3.734808287790918e-07], [2.6709895409710467e-07], [7.289167404992953e-07], [1.369457415466076e-07], [1.0132089032459697e-07], [1.2666714375460364e-08], [1.364653808581433e-09], [1.3337124071089449e-08], [4.799736499314927e-09], [6.132842011687386e-07], [9.992203428155589e-08], [5.882781100187105e-07], [1.0116478323727121e-08], [6.929665642272139e-08]]}, "hidden_layer_sizes": {"dims": ["iter", "suggestion"], "attrs": {}, "data": [[113], [51], [84], [166], [175], [90], [166], [95], [96], [191], [98], [133], [127], [185], [122], [195], [159], [188], [131], [93]]}, "learning_rate_init": {"dims": ["iter", "suggestion"], "attrs": {}, "data": [[2.4289221749067036e-05], [7.837605095050725e-05], [0.01103036401493826], [0.08235499280424939], [4.6661951545070405e-05], [0.003438685349957682], [0.0009295716100348446], [4.851152071555882e-05], [0.004570747817620291], [0.0002473453249441379], [0.002361627016141239], [0.0003887453833751895], [0.0009958403182255195], [0.015078958450065731], [0.004744260487902496], [0.0018659749372938155], [0.05956171904063579], [0.0012059901739717987], [0.060968072783786784], [0.014982380301157793]]}, "tol": {"dims": ["iter", "suggestion"], "attrs": {}, "data": [[3.2597850570015076e-05], [0.0006695814803162064], [0.030087471589495148], [0.00026416121391083393], [0.004130168650573817], [0.00013344960338504722], [0.0003923270312146863], [5.8985673127840595e-05], [0.059777176911034166], [0.09317967026858429], [0.00011560500331319529], [5.8844001219675864e-05], [4.965605654664904e-05], [0.029306563800654117], [0.0001574685341438534], [0.0004540240716052208], [0.0004504440966570244], [0.0005944192216900195], [3.415171484448192e-05], [1.0210344343619391e-05]]}, "validation_fraction": {"dims": ["iter", "suggestion"], "attrs": {}, "data": [[0.33897932988373264], [0.2594781544778578], [0.5999198276907146], [0.17840929271504727], [0.6436987290389151], [0.22528405173816418], [0.15128313307669797], [0.38079482648586593], [0.8309014077596633], [0.319403806309939], [0.17732245653965156], [0.12720478179373776], [0.19351711488113987], [0.3309840580235166], [0.33493154727261626], [0.8727808826411628], [0.4703162776194198], [0.258077621258556], [0.7772848233271591], [0.2456790552377735]]}}}}
