# Supplementary material
Source: ML conference proceedings conference paper supplement (https://proceedings.neurips.cc/paper_files/paper/2022/hash/31a57804448363bcab777f818f75f5b4-Abstract.html)
Supplement: Supplementary file 1 [file 31a57804448363bcab777f818f75f5b4-Supplemental-Conference.zip › trading_off_resource_budgets_f-Supplementary Material/code_and_data/experiments/base_results/bo_20220228_124924_b7rkpeqg/suggest_log/0ce2589a918156e386b76211a62448d4.json]

{"meta": {"args": {"--uuid": "0ce2589a918156e386b76211a62448d4", "-db-root": "/home/damon_falck/blackboxbandits/experiments/saved_results", "--opt-root": "/home/damon_falck/blackboxbandits/experiments", "--data-root": "/home/damon_falck/blackboxbandits/experiments/penn_datasets", "--db": "bo_20220228_124924_b7rkpeqg", "--opt": "Scikit-GBRT-Hedge", "--data": "reg-657-fri-c2-250-10", "--classifier": "MLP-adam", "--metric": "mse", "--calls": 20, "--suggestions": 1, "--jobs-file": null, "--verbose": false, "dry_run": false, "rev": "bd14afd", "opt_rev": "0.9.0"}, "signature": [[{"alpha": 0.019628224813442792, "batch_size": 182, "beta_1": 0.9410202200271762, "beta_2": 0.9998021557676793, "epsilon": 1.8662266976518e-08, "hidden_layer_sizes": 147, "learning_rate_init": 0.0005627932047415167, "tol": 0.03690557729213761, "validation_fraction": 0.8846827852548593}, {"alpha": 0.001998246739232944, "batch_size": 200, "beta_1": 0.919111482530466, "beta_2": 0.9998488260436156, "epsilon": 5.981221901152555e-07, "hidden_layer_sizes": 61, "learning_rate_init": 2.2310905607443014e-05, "tol": 1.2046852412030316e-05, "validation_fraction": 0.8117896445826539}, {"alpha": 0.46659545670218433, "batch_size": 219, "beta_1": 0.9889789783750891, "beta_2": 0.9999896868093284, "epsilon": 2.4234724484675948e-08, "hidden_layer_sizes": 167, "learning_rate_init": 2.972334644335654e-05, "tol": 0.0036281404040243792, "validation_fraction": 0.17260651658522078}, {"alpha": 4.656005689076002, "batch_size": 135, "beta_1": 0.870503881627747, "beta_2": 0.9948873266941017, "epsilon": 2.1023308743480125e-07, "hidden_layer_sizes": 118, "learning_rate_init": 0.001878173875716191, "tol": 1.1889379831773006e-05, "validation_fraction": 0.6264327093752792}, {"alpha": 0.04705159350400542, "batch_size": 158, "beta_1": 0.9870884262730957, "beta_2": 0.9999596874382349, "epsilon": 1.1981845126013875e-08, "hidden_layer_sizes": 116, "learning_rate_init": 0.006173405204074311, "tol": 1.7414134181586194e-05, "validation_fraction": 0.6754299026638921}], [1.0837208629771324, 1.2290696496516804, 1.6688945068650347, 0.9039524709726254, 0.9670255564672662]]},
"data": {"coords": {"iter": {"dims": ["iter"], "attrs": {}, "data": [0, 1, 2, 3, 4, 5, 6, 7, 8, 9, 10, 11, 12, 13, 14, 15, 16, 17, 18, 19]}, "suggestion": {"dims": ["suggestion"], "attrs": {}, "data": [0]}}, "attrs": {}, "dims": {"iter": 20, "suggestion": 1}, "data_vars": {"alpha": {"dims": ["iter", "suggestion"], "attrs": {}, "data": [[0.011294214062711333], [0.032901757768101614], [0.0008966205566475609], [1.8028819340817474e-05], [1.2235532811674772], [1.6426056298912552], [3.291593753711568e-05], [0.041938360385872064], [0.008352068368322916], [0.028567781043912773], [0.036718530717393054], [0.7982189901780642], [5.8372621928511315], [0.826842490653567], [2.714313395488323e-05], [0.04455790458920808], [2.0233856502132823e-05], [9.062054146341925], [1.7345855325605906], [7.792558636280068]]}, "batch_size": {"dims": ["iter", "suggestion"], "attrs": {}, "data": [[214], [51], [37], [65], [108], [232], [195], [74], [49], [14], [214], [10], [30], [63], [37], [77], [224], [222], [242], [240]]}, "beta_1": {"dims": ["iter", "suggestion"], "attrs": {}, "data": [[0.6969060710807554], [0.6815928679298507], [0.5761408483517526], [0.8958565408480581], [0.9349782462624253], [0.5581924046396775], [0.9504869123072892], [0.6240159198143203], [0.981455130963982], [0.7880098854192928], [0.5474963046449567], [0.5574851514623934], [0.9418313367895977], [0.8026426755734662], [0.686844405238058], [0.5481385159026256], [0.6328304956453297], [0.9412096934857875], [0.7478429552275682], [0.8789230373326371]]}, "beta_2": {"dims": ["iter", "suggestion"], "attrs": {}, "data": [[0.9257915872425868], [0.9104589162800643], [0.9551384316569589], [0.9692324857435833], [0.9810173242534674], [0.9123216367491793], [0.9040059543420453], [0.9761831312667204], [0.9604316776575874], [0.9754872093695957], [0.9164611581477844], [0.9081870989887887], [0.9142096802784112], [0.9815760416847077], [0.9061391616287142], [0.9975427329026667], [0.9481348224788834], [0.9013679234585833], [0.9111754854836581], [0.9682745840551056]]}, "epsilon": {"dims": ["iter", "suggestion"], "attrs": {}, "data": [[1.8659460239798584e-07], [1.0869177153701865e-09], [2.7186998980343486e-07], [9.270606455560763e-08], [1.8658944382779468e-07], [3.0572174860475066e-09], [1.7281357907374905e-09], [1.0137251677956608e-09], [1.1083382414248405e-08], [1.813011397192045e-07], [4.598174563368235e-09], [1.474201049747185e-07], [1.2913425517278783e-09], [1.585905234125656e-07], [1.061328062768745e-09], [1.392132926709757e-07], [2.924686212945107e-07], [1.009754100727317e-09], [6.109197120071386e-08], [8.513579418208427e-09]]}, "hidden_layer_sizes": {"dims": ["iter", "suggestion"], "attrs": {}, "data": [[154], [71], [105], [94], [102], [70], [92], [93], [60], [110], [161], [197], [59], [88], [83], [83], [84], [137], [126], [120]]}, "learning_rate_init": {"dims": ["iter", "suggestion"], "attrs": {}, "data": [[0.022310891583743175], [0.08719864028595087], [0.00022601849905714126], [0.00013358457413360938], [9.712150554679818e-05], [4.464983890745729e-05], [0.04771567720951684], [0.07595676938453193], [0.09221682264337398], [0.004547475621231548], [0.00011023040583079615], [1.5670627724494577e-05], [0.0017644951980995123], [1.1078958958907807e-05], [3.6984080101259003e-05], [0.09665138012130628], [0.00010205611550896738], [1.0145034602377785e-05], [0.0863193307413], [0.00012100017035802399]]}, "tol": {"dims": ["iter", "suggestion"], "attrs": {}, "data": [[0.00031317177659732513], [8.068218773079102e-05], [0.09359024789764742], [0.00041940680995952473], [0.022910741210976956], [0.00023345770548798946], [2.01667523701351e-05], [0.0018043336976852854], [0.0822838549215959], [1.717105936283194e-05], [0.0001490645949147188], [1.0937206592446326e-05], [1.0969529152140367e-05], [2.748264492213503e-05], [0.00022542859870281954], [2.100279326006593e-05], [2.5206327055387783e-05], [0.009001060905201547], [1.5869946418430228e-05], [0.000907989443651909]]}, "validation_fraction": {"dims": ["iter", "suggestion"], "attrs": {}, "data": [[0.3564750412085869], [0.10025467024196956], [0.5022796281214337], [0.13289972530045205], [0.26170869734018526], [0.10280802908448243], [0.11269056363644189], [0.6023782011536801], [0.10037453467213951], [0.10017536388286091], [0.10015010439737593], [0.10686612993536261], [0.4451324820335713], [0.10023314463920201], [0.7000236264695936], [0.10013892642916288], [0.7080542172926287], [0.24667617228139574], [0.2664336017034936], [0.2328297116197401]]}}}}
