# Supplementary material
Source: ML conference proceedings conference paper supplement (https://proceedings.neurips.cc/paper_files/paper/2022/hash/31a57804448363bcab777f818f75f5b4-Abstract.html)
Supplement: Supplementary file 1 [file 31a57804448363bcab777f818f75f5b4-Supplemental-Conference.zip › trading_off_resource_budgets_f-Supplementary Material/code_and_data/experiments/base_results/bo_20220228_124924_b7rkpeqg/suggest_log/0d2a91d132035ec89e024bb338b77d4e.json]

{"meta": {"args": {"--uuid": "0d2a91d132035ec89e024bb338b77d4e", "-db-root": "/home/damon_falck/blackboxbandits/experiments/saved_results", "--opt-root": "/home/damon_falck/blackboxbandits/experiments", "--data-root": "/home/damon_falck/blackboxbandits/experiments/penn_datasets", "--db": "bo_20220228_124924_b7rkpeqg", "--opt": "RandomSearch", "--data": "clf-pendigits", "--classifier": "lasso", "--metric": "nll", "--calls": 20, "--suggestions": 1, "--jobs-file": null, "--verbose": false, "dry_run": false, "rev": "bd14afd", "opt_rev": "0.0.8"}, "signature": [[{"C": 1.5676677195506077, "intercept_scaling": 7.257005721594282}, {"C": 2.57663857461359, "intercept_scaling": 1.5119336467641016}, {"C": 0.49501595537331966, "intercept_scaling": 3.833332156156665}, {"C": 0.5627932047415171, "intercept_scaling": 36.905577292137636}, {"C": 71.55682161754872, "intercept_scaling": 0.34179529120610125}], [0.26296161632462034, 0.26214243793253567, 0.2710617658733042, 0.26881110266329455, 0.2600583846357505]]},
"data": {"coords": {"iter": {"dims": ["iter"], "attrs": {}, "data": [0, 1, 2, 3, 4, 5, 6, 7, 8, 9, 10, 11, 12, 13, 14, 15, 16, 17, 18, 19]}, "suggestion": {"dims": ["suggestion"], "attrs": {}, "data": [0]}}, "attrs": {}, "dims": {"iter": 20, "suggestion": 1}, "data_vars": {"C": {"dims": ["iter", "suggestion"], "attrs": {}, "data": [[0.12925238427068111], [0.05388565706717934], [23.851204998349647], [13.840745684837636], [0.12472666335136112], [1.1984122050949542], [9.543367778923821], [0.20721447549015132], [0.023937605596058675], [92.79069327428891], [1.0245496355202117], [0.013568709066456044], [0.033421891145367845], [0.0959293383253314], [0.014658772580245989], [1.0416319296172878], [0.40280509778916246], [7.35885388988324], [15.36610919127544], [0.04234922562940346]]}, "intercept_scaling": {"dims": ["iter", "suggestion"], "attrs": {}, "data": [[0.1938835215065982], [0.3041821238416437], [26.03988432288602], [0.24586556029689896], [0.6895502639824889], [0.4728289110651077], [6.5947652926322196], [6.294091099722169], [18.332669763201565], [0.5634090803337465], [0.6724700958934989], [0.23830143567845663], [13.472867273895089], [2.040834187750503], [0.9796600188230996], [0.01529977420758575], [0.010264060454139572], [6.305842294653259], [0.1405046446808966], [0.01075782635044566]]}}}}
