# Supplementary material
Source: ML conference proceedings conference paper supplement (https://proceedings.neurips.cc/paper_files/paper/2022/hash/31a57804448363bcab777f818f75f5b4-Abstract.html)
Supplement: Supplementary file 1 [file 31a57804448363bcab777f818f75f5b4-Supplemental-Conference.zip › trading_off_resource_budgets_f-Supplementary Material/code_and_data/experiments/base_results/bo_20220228_124924_b7rkpeqg/suggest_log/0d3f841daccc5cb187f8c1923206754a.json]

{"meta": {"args": {"--uuid": "0d3f841daccc5cb187f8c1923206754a", "-db-root": "/home/damon_falck/blackboxbandits/experiments/saved_results", "--opt-root": "/home/damon_falck/blackboxbandits/experiments", "--data-root": "/home/damon_falck/blackboxbandits/experiments/penn_datasets", "--db": "bo_20220228_124924_b7rkpeqg", "--opt": "RandomSearch", "--data": "reg-598-fri-c0-1000-25", "--classifier": "MLP-adam", "--metric": "mse", "--calls": 20, "--suggestions": 1, "--jobs-file": null, "--verbose": false, "dry_run": false, "rev": "bd14afd", "opt_rev": "0.0.8"}, "signature": [[{"alpha": 0.019628224813442792, "batch_size": 182, "beta_1": 0.9410202200271762, "beta_2": 0.9998021557676793, "epsilon": 1.8662266976518e-08, "hidden_layer_sizes": 147, "learning_rate_init": 0.0005627932047415167, "tol": 0.03690557729213761, "validation_fraction": 0.8846827852548593}, {"alpha": 0.001998246739232944, "batch_size": 200, "beta_1": 0.919111482530466, "beta_2": 0.9998488260436156, "epsilon": 5.981221901152555e-07, "hidden_layer_sizes": 61, "learning_rate_init": 2.2310905607443014e-05, "tol": 1.2046852412030316e-05, "validation_fraction": 0.8117896445826539}, {"alpha": 0.46659545670218433, "batch_size": 219, "beta_1": 0.9889789783750891, "beta_2": 0.9999896868093284, "epsilon": 2.4234724484675948e-08, "hidden_layer_sizes": 167, "learning_rate_init": 2.972334644335654e-05, "tol": 0.0036281404040243792, "validation_fraction": 0.17260651658522078}, {"alpha": 4.656005689076002, "batch_size": 135, "beta_1": 0.870503881627747, "beta_2": 0.9948873266941017, "epsilon": 2.1023308743480125e-07, "hidden_layer_sizes": 118, "learning_rate_init": 0.001878173875716191, "tol": 1.1889379831773006e-05, "validation_fraction": 0.6264327093752792}, {"alpha": 0.04705159350400542, "batch_size": 158, "beta_1": 0.9870884262730957, "beta_2": 0.9999596874382349, "epsilon": 1.1981845126013875e-08, "hidden_layer_sizes": 116, "learning_rate_init": 0.006173405204074311, "tol": 1.7414134181586194e-05, "validation_fraction": 0.6754299026638921}], [1.0047792991350553, 1.3308440037941487, 0.923576673223723, 0.2818446665456819, 0.43801064928593175]]},
"data": {"coords": {"iter": {"dims": ["iter"], "attrs": {}, "data": [0, 1, 2, 3, 4, 5, 6, 7, 8, 9, 10, 11, 12, 13, 14, 15, 16, 17, 18, 19]}, "suggestion": {"dims": ["suggestion"], "attrs": {}, "data": [0]}}, "attrs": {}, "dims": {"iter": 20, "suggestion": 1}, "data_vars": {"alpha": {"dims": ["iter", "suggestion"], "attrs": {}, "data": [[0.0115783958383523], [0.010053179919095026], [6.126169641551982e-05], [5.0905796692615106e-05], [1.1575337836893887e-05], [8.071482038121848], [0.0005087165172410256], [4.111419732378509], [0.04211939906043846], [0.006251778233271985], [0.0011814345307322909], [1.6389422068429154], [2.2359500739068654], [0.0005552996720446344], [0.19554324655470984], [0.0006168186104169971], [6.644563283691262], [0.009029645007789543], [0.005491943483753095], [0.00020388153681078365]]}, "batch_size": {"dims": ["iter", "suggestion"], "attrs": {}, "data": [[219], [236], [144], [68], [114], [94], [13], [116], [138], [122], [90], [29], [37], [122], [55], [87], [49], [231], [153], [132]]}, "beta_1": {"dims": ["iter", "suggestion"], "attrs": {}, "data": [[0.9617355701925213], [0.9865066421922216], [0.5095736565755496], [0.9416032900293461], [0.5359578908788268], [0.5664640663574337], [0.9586820468688255], [0.7206437452704076], [0.9038952242446252], [0.7802216632226113], [0.748727968250406], [0.9801931283329658], [0.8428562056499866], [0.9402487187525751], [0.832542546767083], [0.643856970696861], [0.644808821876562], [0.6439352322648945], [0.9889814484673529], [0.9510332056687516]]}, "beta_2": {"dims": ["iter", "suggestion"], "attrs": {}, "data": [[0.941542993939451], [0.9999272488106785], [0.9999988077692291], [0.9737834752383306], [0.9987403520158323], [0.996499367477053], [0.9991881747220104], [0.9981569112339624], [0.9999872668761818], [0.9997870413706389], [0.9986532982497961], [0.9880539731869928], [0.9874082562244995], [0.9999989232538794], [0.999998601031977], [0.9998871692824761], [0.999985853550469], [0.9711783983595204], [0.9995263060782535], [0.99979088875779]]}, "epsilon": {"dims": ["iter", "suggestion"], "attrs": {}, "data": [[7.558277802670348e-08], [9.078728067806032e-08], [1.5601901629726144e-07], [2.4535308530132607e-09], [7.81074952644494e-07], [1.2044770612194897e-09], [1.448431846763896e-07], [3.760126671100911e-07], [3.4284007835381173e-07], [3.0645603330631735e-09], [3.683894566327818e-09], [3.087933802634899e-09], [9.641700064005725e-09], [1.921587833417925e-08], [2.508991732925214e-09], [6.228468525127498e-09], [4.833270069567224e-08], [1.76425991418453e-08], [3.422619431234019e-07], [1.9132392799893993e-09]]}, "hidden_layer_sizes": {"dims": ["iter", "suggestion"], "attrs": {}, "data": [[115], [122], [80], [151], [84], [70], [162], [70], [133], [131], [66], [146], [139], [91], [139], [177], [123], [109], [68], [194]]}, "learning_rate_init": {"dims": ["iter", "suggestion"], "attrs": {}, "data": [[1.3924516845147176e-05], [1.7536793483165535e-05], [0.009069210785749328], [0.0021413485699926893], [0.0667862154254634], [0.029584460686295066], [0.00013202990590124546], [0.00035119083818681784], [0.004796797915586094], [0.02987150971722493], [2.5419183172072655e-05], [0.0003658669679322126], [5.90961521609639e-05], [7.678092361447084e-05], [0.0013270133712551915], [0.0037787298968184452], [0.021724831278100945], [0.05482336875882115], [2.6509544429705938e-05], [0.0002405846493754579]]}, "tol": {"dims": ["iter", "suggestion"], "attrs": {}, "data": [[2.1157582219077174e-05], [3.154820156667014e-05], [0.016154322698906074], [0.004255464316703811], [0.0006428946097943222], [0.0003127792808351545], [0.0019179969183944182], [0.000395024729045168], [3.3501569714414584e-05], [2.093531686590546e-05], [0.0019668147167023688], [0.005775309302854919], [0.0017950166969472135], [0.05735749224361292], [0.00842382821345219], [0.0005600796756708449], [0.017645236768922386], [0.004387526856790414], [0.05500020753744906], [0.0001268942338287301]]}, "validation_fraction": {"dims": ["iter", "suggestion"], "attrs": {}, "data": [[0.552655269894252], [0.7080367923608132], [0.21400756857198258], [0.10203196505664448], [0.16517595247187564], [0.6251245117875892], [0.4108298827295412], [0.8528272899078231], [0.521908671309068], [0.7574031708055807], [0.8104404370538911], [0.5173883041802549], [0.5604464673979618], [0.3187069702317821], [0.49292630377233027], [0.6105003116904368], [0.19984892683549743], [0.27542112932108004], [0.4731867772641551], [0.11571207720988055]]}}}}
