# Supplementary material
Source: ML conference proceedings conference paper supplement (https://proceedings.neurips.cc/paper_files/paper/2022/hash/31a57804448363bcab777f818f75f5b4-Abstract.html)
Supplement: Supplementary file 1 [file 31a57804448363bcab777f818f75f5b4-Supplemental-Conference.zip › trading_off_resource_budgets_f-Supplementary Material/code_and_data/experiments/base_results/bo_20220228_124924_b7rkpeqg/suggest_log/0d4bff367b905cbd956010e1126d39d7.json]

{"meta": {"args": {"--uuid": "0d4bff367b905cbd956010e1126d39d7", "-db-root": "/home/damon_falck/blackboxbandits/experiments/saved_results", "--opt-root": "/home/damon_falck/blackboxbandits/experiments", "--data-root": "/home/damon_falck/blackboxbandits/experiments/penn_datasets", "--db": "bo_20220228_124924_b7rkpeqg", "--opt": "OpenTuner-GA-DE", "--data": "clf-parity5", "--classifier": "lasso", "--metric": "nll", "--calls": 20, "--suggestions": 1, "--jobs-file": null, "--verbose": false, "dry_run": false, "rev": "bd14afd", "opt_rev": "0.8.7"}, "signature": [[{"C": 1.5676677195506077, "intercept_scaling": 7.257005721594282}, {"C": 2.57663857461359, "intercept_scaling": 1.5119336467641016}, {"C": 0.49501595537331966, "intercept_scaling": 3.833332156156665}, {"C": 0.5627932047415171, "intercept_scaling": 36.905577292137636}, {"C": 71.55682161754872, "intercept_scaling": 0.34179529120610125}], [0.8240191689044238, 0.856922408984165, 0.7260900442727933, 0.7333417047614214, 0.9163883278402226]]},
"data": {"coords": {"iter": {"dims": ["iter"], "attrs": {}, "data": [0, 1, 2, 3, 4, 5, 6, 7, 8, 9, 10, 11, 12, 13, 14, 15, 16, 17, 18, 19]}, "suggestion": {"dims": ["suggestion"], "attrs": {}, "data": [0]}}, "attrs": {}, "dims": {"iter": 20, "suggestion": 1}, "data_vars": {"C": {"dims": ["iter", "suggestion"], "attrs": {}, "data": [[0.12276041643648548], [46.82870909307103], [0.2950023862396147], [11.619397172385073], [4.832089149699058], [34.93457095743617], [0.046304797716156136], [58.881956469198705], [0.2950023862396147], [25.59090302701272], [30.31295000633291], [0.01588969648499882], [0.04089517982373402], [1.6799177112560073], [2.772226564293765], [0.14417751193559747], [3.16437812302739], [1.9242088747318224], [39.09957476871334], [0.2950023862396147]]}, "intercept_scaling": {"dims": ["iter", "suggestion"], "attrs": {}, "data": [[6.955195016526458], [3.712351611194075], [0.12205234606975], [17.506909605225637], [0.12205234606975], [0.12205234606975], [0.12205234606975], [28.30558387251395], [0.4515410607599053], [15.20396720879039], [9.437240705982287], [0.12205234606975], [0.12205234606975], [0.06926096198443331], [87.00997572578115], [0.12205234606975], [7.958874482143365], [15.264916118997037], [9.287184800025162], [0.5866620079572737]]}}}}
