# Supplementary material
Source: ML conference proceedings conference paper supplement (https://proceedings.neurips.cc/paper_files/paper/2022/hash/31a57804448363bcab777f818f75f5b4-Abstract.html)
Supplement: Supplementary file 1 [file 31a57804448363bcab777f818f75f5b4-Supplemental-Conference.zip › trading_off_resource_budgets_f-Supplementary Material/code_and_data/experiments/base_results/bo_20220228_124924_b7rkpeqg/suggest_log/0d5a9b9193965a319e0af8eefb97ee35.json]

{"meta": {"args": {"--uuid": "0d5a9b9193965a319e0af8eefb97ee35", "-db-root": "/home/damon_falck/blackboxbandits/experiments/saved_results", "--opt-root": "/home/damon_falck/blackboxbandits/experiments", "--data-root": "/home/damon_falck/blackboxbandits/experiments/penn_datasets", "--db": "bo_20220228_124924_b7rkpeqg", "--opt": "HyperOpt", "--data": "clf-flare", "--classifier": "lasso", "--metric": "nll", "--calls": 20, "--suggestions": 1, "--jobs-file": null, "--verbose": false, "dry_run": false, "rev": "bd14afd", "opt_rev": "0.2.7"}, "signature": [[{"C": 1.5676677195506077, "intercept_scaling": 7.257005721594282}, {"C": 2.57663857461359, "intercept_scaling": 1.5119336467641016}, {"C": 0.49501595537331966, "intercept_scaling": 3.833332156156665}, {"C": 0.5627932047415171, "intercept_scaling": 36.905577292137636}, {"C": 71.55682161754872, "intercept_scaling": 0.34179529120610125}], [0.3998803890214383, 0.40058936786039007, 0.3976267757615925, 0.39766302689040195, 0.401928817606254]]},
"data": {"coords": {"iter": {"dims": ["iter"], "attrs": {}, "data": [0, 1, 2, 3, 4, 5, 6, 7, 8, 9, 10, 11, 12, 13, 14, 15, 16, 17, 18, 19]}, "suggestion": {"dims": ["suggestion"], "attrs": {}, "data": [0]}}, "attrs": {}, "dims": {"iter": 20, "suggestion": 1}, "data_vars": {"C": {"dims": ["iter", "suggestion"], "attrs": {}, "data": [[0.015093133518264861], [0.05304745113068787], [0.6306462276223439], [62.52596129668884], [0.035531540839063284], [20.873946331468392], [1.8809487693707923], [1.2137082847945926], [19.612433742066425], [0.011744289925643287], [5.8723873942272045], [1.8789114558350501], [3.029986167433939], [1.1563101861766083], [1.1495182494535623], [14.008804359239708], [0.60895467710755], [1.7565269758096922], [1.6015462670685416], [0.08658048508786062]]}, "intercept_scaling": {"dims": ["iter", "suggestion"], "attrs": {}, "data": [[10.576216845564092], [0.014285841345755574], [3.031952241243213], [23.49345686927133], [0.36560524220433205], [0.013756690823481748], [21.883168900603444], [0.6029348934152461], [0.021344468457956074], [0.03409187906577932], [5.767308908040816], [0.169825636017955], [1.4095622887711146], [16.966639926720514], [7.246462807738996], [0.5852203455707469], [0.04352920649454546], [25.849148345334683], [0.3743609724675166], [1.878777916485497]]}}}}
