# Supplementary material
Source: ML conference proceedings conference paper supplement (https://proceedings.neurips.cc/paper_files/paper/2022/hash/31a57804448363bcab777f818f75f5b4-Abstract.html)
Supplement: Supplementary file 1 [file 31a57804448363bcab777f818f75f5b4-Supplemental-Conference.zip › trading_off_resource_budgets_f-Supplementary Material/code_and_data/experiments/base_results/bo_20220228_124924_b7rkpeqg/suggest_log/0d5f0a8564765577b7c50bab6b1f7125.json]

{"meta": {"args": {"--uuid": "0d5f0a8564765577b7c50bab6b1f7125", "-db-root": "/home/damon_falck/blackboxbandits/experiments/saved_results", "--opt-root": "/home/damon_falck/blackboxbandits/experiments", "--data-root": "/home/damon_falck/blackboxbandits/experiments/penn_datasets", "--db": "bo_20220228_124924_b7rkpeqg", "--opt": "HyperOpt", "--data": "clf-analcatdata-cyyoung8092", "--classifier": "lasso", "--metric": "nll", "--calls": 20, "--suggestions": 1, "--jobs-file": null, "--verbose": false, "dry_run": false, "rev": "bd14afd", "opt_rev": "0.2.7"}, "signature": [[{"C": 1.5676677195506077, "intercept_scaling": 7.257005721594282}, {"C": 2.57663857461359, "intercept_scaling": 1.5119336467641016}, {"C": 0.49501595537331966, "intercept_scaling": 3.833332156156665}, {"C": 0.5627932047415171, "intercept_scaling": 36.905577292137636}, {"C": 71.55682161754872, "intercept_scaling": 0.34179529120610125}], [0.30963443703288857, 0.32169544700989566, 0.3115466696259948, 0.2966203416134016, 0.8119181489712032]]},
"data": {"coords": {"iter": {"dims": ["iter"], "attrs": {}, "data": [0, 1, 2, 3, 4, 5, 6, 7, 8, 9, 10, 11, 12, 13, 14, 15, 16, 17, 18, 19]}, "suggestion": {"dims": ["suggestion"], "attrs": {}, "data": [0]}}, "attrs": {}, "dims": {"iter": 20, "suggestion": 1}, "data_vars": {"C": {"dims": ["iter", "suggestion"], "attrs": {}, "data": [[6.275463490626689], [0.5863310807004838], [4.539366707872812], [0.024061097926429353], [0.10652485730475993], [13.330819478952067], [3.253468031495145], [0.05902833177261266], [2.342595464047678], [7.986927673966098], [0.34421215811429984], [0.10598377318444169], [0.1853712049503984], [3.734649305710533], [0.06298853275925897], [0.07807916725907194], [0.5589674766259769], [5.167286635194076], [0.0267580730543289], [5.373679154417132]]}, "intercept_scaling": {"dims": ["iter", "suggestion"], "attrs": {}, "data": [[65.37478973452104], [0.810672509660119], [0.016086943074224824], [0.8133607985295216], [0.02889643324195023], [1.5461103167204866], [3.5854388568094375], [0.06669087023374787], [93.40606596807288], [0.012816224592676631], [0.6882447368890181], [0.3904176779768779], [0.03325523237987017], [0.015444567040575568], [0.010963608029247795], [0.04082695169199041], [0.051595776367022776], [0.024147377069056383], [23.105117838288095], [0.011737655826256781]]}}}}
