# Supplementary material
Source: ML conference proceedings conference paper supplement (https://proceedings.neurips.cc/paper_files/paper/2022/hash/31a57804448363bcab777f818f75f5b4-Abstract.html)
Supplement: Supplementary file 1 [file 31a57804448363bcab777f818f75f5b4-Supplemental-Conference.zip › trading_off_resource_budgets_f-Supplementary Material/code_and_data/experiments/base_results/bo_20220228_124924_b7rkpeqg/suggest_log/0d6b9e0cb3d553819a071e0bc34c519e.json]

{"meta": {"args": {"--uuid": "0d6b9e0cb3d553819a071e0bc34c519e", "-db-root": "/home/damon_falck/blackboxbandits/experiments/saved_results", "--opt-root": "/home/damon_falck/blackboxbandits/experiments", "--data-root": "/home/damon_falck/blackboxbandits/experiments/penn_datasets", "--db": "bo_20220228_124924_b7rkpeqg", "--opt": "RandomSearch", "--data": "clf-vote", "--classifier": "lasso", "--metric": "nll", "--calls": 20, "--suggestions": 1, "--jobs-file": null, "--verbose": false, "dry_run": false, "rev": "bd14afd", "opt_rev": "0.0.8"}, "signature": [[{"C": 1.5676677195506077, "intercept_scaling": 7.257005721594282}, {"C": 2.57663857461359, "intercept_scaling": 1.5119336467641016}, {"C": 0.49501595537331966, "intercept_scaling": 3.833332156156665}, {"C": 0.5627932047415171, "intercept_scaling": 36.905577292137636}, {"C": 71.55682161754872, "intercept_scaling": 0.34179529120610125}], [0.1490818577182563, 0.16520288081201046, 0.11223017041194872, 0.11757224234318538, 0.6861402436265609]]},
"data": {"coords": {"iter": {"dims": ["iter"], "attrs": {}, "data": [0, 1, 2, 3, 4, 5, 6, 7, 8, 9, 10, 11, 12, 13, 14, 15, 16, 17, 18, 19]}, "suggestion": {"dims": ["suggestion"], "attrs": {}, "data": [0]}}, "attrs": {}, "dims": {"iter": 20, "suggestion": 1}, "data_vars": {"C": {"dims": ["iter", "suggestion"], "attrs": {}, "data": [[0.1457084456693887], [0.27567058280671336], [11.298676111987504], [0.06246373196401092], [30.012481850638135], [0.46172737881881026], [2.896588134962704], [0.021595260024478008], [0.5166703846181105], [4.798871457728418], [3.397412438277434], [43.48196404655718], [0.023890289994635366], [0.1911387089452515], [17.738086721027763], [55.07984861659999], [0.017359658745155594], [0.14611636424002386], [0.18871686304224297], [0.9694331525620562]]}, "intercept_scaling": {"dims": ["iter", "suggestion"], "attrs": {}, "data": [[2.461370243005672], [1.8177476880959216], [5.1434126912644045], [0.6885813524375892], [0.8323070927266093], [0.9495523903229093], [0.06868583786345127], [0.061217810385929224], [13.167659161986064], [5.681049227636142], [5.505715525473678], [0.31402095563912424], [0.5760963432194606], [0.012923253827565713], [13.271782775356229], [2.4656122246897763], [0.02040855276362273], [8.749736254210966], [28.090017458887704], [0.9180952893354934]]}}}}
