# Supplementary material
Source: ML conference proceedings conference paper supplement (https://proceedings.neurips.cc/paper_files/paper/2022/hash/31a57804448363bcab777f818f75f5b4-Abstract.html)
Supplement: Supplementary file 1 [file 31a57804448363bcab777f818f75f5b4-Supplemental-Conference.zip › trading_off_resource_budgets_f-Supplementary Material/code_and_data/experiments/base_results/bo_20220228_124924_b7rkpeqg/suggest_log/0d7c41b59373504cb67df5388acc07a2.json]

{"meta": {"args": {"--uuid": "0d7c41b59373504cb67df5388acc07a2", "-db-root": "/home/damon_falck/blackboxbandits/experiments/saved_results", "--opt-root": "/home/damon_falck/blackboxbandits/experiments", "--data-root": "/home/damon_falck/blackboxbandits/experiments/penn_datasets", "--db": "bo_20220228_124924_b7rkpeqg", "--opt": "OpenTuner-BanditA", "--data": "clf-analcatdata-cyyoung9302", "--classifier": "MLP-adam", "--metric": "nll", "--calls": 20, "--suggestions": 1, "--jobs-file": null, "--verbose": false, "dry_run": false, "rev": "bd14afd", "opt_rev": "0.8.7"}, "signature": [[{"alpha": 0.019628224813442792, "batch_size": 182, "beta_1": 0.9410202200271762, "beta_2": 0.9998021557676793, "epsilon": 1.8662266976518e-08, "hidden_layer_sizes": 147, "learning_rate_init": 0.0005627932047415167, "tol": 0.03690557729213761, "validation_fraction": 0.8846827852548593}, {"alpha": 0.001998246739232944, "batch_size": 200, "beta_1": 0.919111482530466, "beta_2": 0.9998488260436156, "epsilon": 5.981221901152555e-07, "hidden_layer_sizes": 61, "learning_rate_init": 2.2310905607443014e-05, "tol": 1.2046852412030316e-05, "validation_fraction": 0.8117896445826539}, {"alpha": 0.46659545670218433, "batch_size": 219, "beta_1": 0.9889789783750891, "beta_2": 0.9999896868093284, "epsilon": 2.4234724484675948e-08, "hidden_layer_sizes": 167, "learning_rate_init": 2.972334644335654e-05, "tol": 0.0036281404040243792, "validation_fraction": 0.17260651658522078}, {"alpha": 4.656005689076002, "batch_size": 135, "beta_1": 0.870503881627747, "beta_2": 0.9948873266941017, "epsilon": 2.1023308743480125e-07, "hidden_layer_sizes": 118, "learning_rate_init": 0.001878173875716191, "tol": 1.1889379831773006e-05, "validation_fraction": 0.6264327093752792}, {"alpha": 0.04705159350400542, "batch_size": 158, "beta_1": 0.9870884262730957, "beta_2": 0.9999596874382349, "epsilon": 1.1981845126013875e-08, "hidden_layer_sizes": 116, "learning_rate_init": 0.006173405204074311, "tol": 1.7414134181586194e-05, "validation_fraction": 0.6754299026638921}], [0.556875288076077, 0.8994390989063209, 0.7604209665194324, 0.444172152819662, 0.37465839977501225]]},
"data": {"coords": {"iter": {"dims": ["iter"], "attrs": {}, "data": [0, 1, 2, 3, 4, 5, 6, 7, 8, 9, 10, 11, 12, 13, 14, 15, 16, 17, 18, 19]}, "suggestion": {"dims": ["suggestion"], "attrs": {}, "data": [0]}}, "attrs": {}, "dims": {"iter": 20, "suggestion": 1}, "data_vars": {"alpha": {"dims": ["iter", "suggestion"], "attrs": {}, "data": [[1.7563764735680985], [1.7563764735680985], [1.7563764735680985], [4.093631884394706], [8.396759064704614], [5.119475397194679], [2.347012628613865], [1.6248391132784303], [1.7563764735680985], [1.7563764735680985], [2.2948854448297267], [0.9004911480933572], [4.482050880645219], [8.458237960778064], [0.42261215925244916], [7.491758297040917], [7.509762419159383], [0.2623889846431599], [9.797437248312109], [1.6567196642650104]]}, "batch_size": {"dims": ["iter", "suggestion"], "attrs": {}, "data": [[117], [33], [117], [230], [211], [233], [91], [236], [126], [117], [143], [186], [94], [198], [176], [248], [79], [76], [45], [161]]}, "beta_1": {"dims": ["iter", "suggestion"], "attrs": {}, "data": [[0.6917437156122955], [0.6917437156122955], [0.7538625927032907], [0.6193522439094474], [0.7469201866804325], [0.9018503464348178], [0.7446339319258437], [0.8396442189534414], [0.6917437156122955], [0.6917437156122955], [0.646903202893297], [0.8749192083088885], [0.7660630720440379], [0.8875234977825481], [0.7958482343202524], [0.7629608737086491], [0.9236112134906502], [0.6357538141753922], [0.563084577027775], [0.7831458829810825]]}, "beta_2": {"dims": ["iter", "suggestion"], "attrs": {}, "data": [[0.9970518351978617], [0.9970518351978617], [0.9772585718327775], [0.9147305703114975], [0.9782700562777854], [0.9119173426834252], [0.9424371056758072], [0.9174660288300381], [0.9919590952189389], [0.9970518351978617], [0.9257364354071688], [0.9452922609379056], [0.9812834508765811], [0.9672460612704874], [0.986878233115811], [0.9836518068237587], [0.9596548166876608], [0.9394586571634532], [0.9468061929249522], [0.9364330298057967]]}, "epsilon": {"dims": ["iter", "suggestion"], "attrs": {}, "data": [[8.070616232263839e-07], [8.070616232263839e-07], [8.070616232263839e-07], [3.414111506011276e-07], [8.175621332434369e-07], [3.363014734752691e-07], [2.622190015405247e-07], [7.304898700660468e-07], [8.070616232263839e-07], [3.2712561429168354e-07], [1.7590515591411792e-07], [7.178727280681963e-07], [9.803553699122271e-07], [8.205541740807499e-07], [6.978919628036474e-07], [1.7510422881170006e-07], [4.2496955923784676e-07], [6.137671587918826e-07], [4.2063773678155294e-07], [2.9368527512726907e-07]]}, "hidden_layer_sizes": {"dims": ["iter", "suggestion"], "attrs": {}, "data": [[92], [92], [92], [127], [53], [92], [93], [138], [106], [92], [126], [146], [90], [87], [71], [130], [155], [81], [50], [179]]}, "learning_rate_init": {"dims": ["iter", "suggestion"], "attrs": {}, "data": [[0.049261540981700484], [0.049261540981700484], [0.01973913087245698], [0.004618049890510335], [0.08693289585020907], [0.06700594878379522], [0.016807730927312848], [0.0028087890332896726], [0.0407586957938652], [0.049261540981700484], [0.08573583617907336], [0.0027690528561356465], [0.05884496170826597], [0.07514839056744564], [0.08697633603689685], [0.06158552933252908], [0.03243524954808435], [0.01125367694531947], [0.09228175703264589], [0.03828991047126589]]}, "tol": {"dims": ["iter", "suggestion"], "attrs": {}, "data": [[0.048355756569753376], [0.048355756569753376], [0.048355756569753376], [0.026724730875528225], [0.07078176690808517], [0.09140724948804883], [0.010868853973335414], [0.009739308809718118], [0.048355756569753376], [0.048355756569753376], [0.09822104657790158], [0.05605315554951756], [0.07461270668969237], [0.05092298235752917], [0.0816105065001264], [0.07615503396594352], [0.05653475070585905], [0.012382238605555807], [0.03498011306794185], [0.049479874819011]]}, "validation_fraction": {"dims": ["iter", "suggestion"], "attrs": {}, "data": [[0.8571372689570432], [0.7611773859112292], [0.862612721207772], [0.8306160652050972], [0.2655400496387917], [0.8235182525645663], [0.6976578318884076], [0.5123257507568363], [0.7673680799809409], [0.5905393849891786], [0.42802442427232656], [0.29098752859945864], [0.2483190172917616], [0.1432511674694089], [0.4523641013802129], [0.2373729065905324], [0.45603021609846806], [0.7982131518300719], [0.6551154702492988], [0.5564391416561206]]}}}}
