# Supplementary material
Source: ML conference proceedings conference paper supplement (https://proceedings.neurips.cc/paper_files/paper/2022/hash/31a57804448363bcab777f818f75f5b4-Abstract.html)
Supplement: Supplementary file 1 [file 31a57804448363bcab777f818f75f5b4-Supplemental-Conference.zip › trading_off_resource_budgets_f-Supplementary Material/code_and_data/experiments/base_results/bo_20220228_124924_b7rkpeqg/suggest_log/0d99d4a87dfc59f9872cd2f1dd5973d8.json]

{"meta": {"args": {"--uuid": "0d99d4a87dfc59f9872cd2f1dd5973d8", "-db-root": "/home/damon_falck/blackboxbandits/experiments/saved_results", "--opt-root": "/home/damon_falck/blackboxbandits/experiments", "--data-root": "/home/damon_falck/blackboxbandits/experiments/penn_datasets", "--db": "bo_20220228_124924_b7rkpeqg", "--opt": "Scikit-GBRT-Hedge", "--data": "clf-analcatdata-authorship", "--classifier": "MLP-adam", "--metric": "nll", "--calls": 20, "--suggestions": 1, "--jobs-file": null, "--verbose": false, "dry_run": false, "rev": "bd14afd", "opt_rev": "0.9.0"}, "signature": [[{"alpha": 0.019628224813442792, "batch_size": 182, "beta_1": 0.9410202200271762, "beta_2": 0.9998021557676793, "epsilon": 1.8662266976518e-08, "hidden_layer_sizes": 147, "learning_rate_init": 0.0005627932047415167, "tol": 0.03690557729213761, "validation_fraction": 0.8846827852548593}, {"alpha": 0.001998246739232944, "batch_size": 200, "beta_1": 0.919111482530466, "beta_2": 0.9998488260436156, "epsilon": 5.981221901152555e-07, "hidden_layer_sizes": 61, "learning_rate_init": 2.2310905607443014e-05, "tol": 1.2046852412030316e-05, "validation_fraction": 0.8117896445826539}, {"alpha": 0.46659545670218433, "batch_size": 219, "beta_1": 0.9889789783750891, "beta_2": 0.9999896868093284, "epsilon": 2.4234724484675948e-08, "hidden_layer_sizes": 167, "learning_rate_init": 2.972334644335654e-05, "tol": 0.0036281404040243792, "validation_fraction": 0.17260651658522078}, {"alpha": 4.656005689076002, "batch_size": 135, "beta_1": 0.870503881627747, "beta_2": 0.9948873266941017, "epsilon": 2.1023308743480125e-07, "hidden_layer_sizes": 118, "learning_rate_init": 0.001878173875716191, "tol": 1.1889379831773006e-05, "validation_fraction": 0.6264327093752792}, {"alpha": 0.04705159350400542, "batch_size": 158, "beta_1": 0.9870884262730957, "beta_2": 0.9999596874382349, "epsilon": 1.1981845126013875e-08, "hidden_layer_sizes": 116, "learning_rate_init": 0.006173405204074311, "tol": 1.7414134181586194e-05, "validation_fraction": 0.6754299026638921}], [0.4451881954692653, 1.5221793653163982, 0.7203531290637076, 0.12689150537518595, 0.028591134214524472]]},
"data": {"coords": {"iter": {"dims": ["iter"], "attrs": {}, "data": [0, 1, 2, 3, 4, 5, 6, 7, 8, 9, 10, 11, 12, 13, 14, 15, 16, 17, 18, 19]}, "suggestion": {"dims": ["suggestion"], "attrs": {}, "data": [0]}}, "attrs": {}, "dims": {"iter": 20, "suggestion": 1}, "data_vars": {"alpha": {"dims": ["iter", "suggestion"], "attrs": {}, "data": [[4.4045547408675425], [0.3177661461296788], [0.000620006097885325], [0.19542387165649114], [0.001596024512986424], [3.970284185826429e-05], [0.0049008685645985355], [0.15284466237743582], [0.01645871659618356], [0.011009659063474292], [0.18488403793054542], [0.9585226152587643], [0.0006078840443965198], [0.29439383858915386], [1.9434361852442135], [0.09550962256500786], [1.5431792620730993], [0.002363719733232482], [6.893267974405777], [0.03773548534304982]]}, "batch_size": {"dims": ["iter", "suggestion"], "attrs": {}, "data": [[208], [239], [206], [204], [192], [231], [22], [102], [79], [126], [214], [95], [81], [228], [42], [142], [104], [248], [59], [203]]}, "beta_1": {"dims": ["iter", "suggestion"], "attrs": {}, "data": [[0.5772253589903494], [0.5340086569027311], [0.6499402431178865], [0.674188643604898], [0.79994931473627], [0.7190939009970989], [0.6755183387567779], [0.5101950238528294], [0.5444692337754519], [0.6944969351272772], [0.716946807809641], [0.8584799443682548], [0.5007402197306372], [0.5813809286523999], [0.6639451326766473], [0.5007175901840771], [0.6636843615925612], [0.5676388049755805], [0.957035260659228], [0.5417211545302086]]}, "beta_2": {"dims": ["iter", "suggestion"], "attrs": {}, "data": [[0.9209903191573998], [0.9008774760708352], [0.9692243645124247], [0.9782455071092063], [0.9426486618264064], [0.9791970948268152], [0.9426441270928462], [0.9365158205438626], [0.9519794613104582], [0.9249035830034329], [0.9160450609538807], [0.978792734511282], [0.9131199055915415], [0.9073040373302662], [0.9158331326197363], [0.946450741005285], [0.9853368604724222], [0.9714785053397508], [0.972452392184624], [0.9831486686112457]]}, "epsilon": {"dims": ["iter", "suggestion"], "attrs": {}, "data": [[1.8137400392489452e-08], [2.696253818009407e-09], [8.29702075585404e-07], [2.9066983367006497e-07], [5.67127021908101e-08], [3.682648018471641e-08], [1.481376205471984e-09], [1.419468892286115e-09], [5.353743718692532e-09], [2.3638050721393264e-07], [2.059143305026805e-07], [1.001479929250116e-09], [5.6950840537718664e-08], [2.0333565787288046e-08], [2.3323323596288563e-07], [1.704865679031049e-09], [3.1402493917484987e-09], [8.848218839646619e-08], [6.925047264690223e-07], [1.5629333330241322e-08]]}, "hidden_layer_sizes": {"dims": ["iter", "suggestion"], "attrs": {}, "data": [[180], [148], [118], [104], [96], [171], [194], [139], [164], [111], [111], [151], [178], [191], [130], [143], [118], [162], [87], [145]]}, "learning_rate_init": {"dims": ["iter", "suggestion"], "attrs": {}, "data": [[2.700131307247407e-05], [0.0031290867581804434], [0.03455148444293302], [6.119849441841999e-05], [0.00619036836645791], [0.04724251733102939], [0.017827094045738148], [0.018706895225792348], [0.00038994581078998793], [0.00012441629964564082], [0.009138963810911433], [0.009295259478670638], [0.028525558197688355], [0.011605457620432583], [0.09159255750015327], [0.02467988297189311], [0.03654328482960674], [0.02130192713989984], [0.037506868947597534], [0.017159368187443465]]}, "tol": {"dims": ["iter", "suggestion"], "attrs": {}, "data": [[0.00028866409160825625], [0.06712932214987671], [0.03903857933525798], [0.08755228308654367], [1.763648087447651e-05], [0.05181027684298336], [0.07920270123098831], [0.08574284102577169], [0.09279582906511287], [0.03183434076593236], [0.009045110004846259], [0.06854100944064156], [0.01020225625415876], [1.3487331630687804e-05], [0.0059077225490102156], [0.0007985207270463231], [0.004893995719680713], [0.012415303870704109], [0.00212090766049323], [0.08856143983142797]]}, "validation_fraction": {"dims": ["iter", "suggestion"], "attrs": {}, "data": [[0.14869737716545664], [0.2288960470845121], [0.12450226981255824], [0.6668319977552862], [0.11579253963375945], [0.47893353420289303], [0.7317104259333517], [0.39580209764688523], [0.3189390279935897], [0.5236417768043555], [0.25207615709810655], [0.1557686563475033], [0.12914334443151013], [0.8381550995665503], [0.11416944412594274], [0.12611025724638114], [0.31062683825513576], [0.26409226737187985], [0.63612139993461], [0.15506512350126567]]}}}}
