# Supplementary material
Source: ML conference proceedings conference paper supplement (https://proceedings.neurips.cc/paper_files/paper/2022/hash/31a57804448363bcab777f818f75f5b4-Abstract.html)
Supplement: Supplementary file 1 [file 31a57804448363bcab777f818f75f5b4-Supplemental-Conference.zip › trading_off_resource_budgets_f-Supplementary Material/code_and_data/experiments/base_results/bo_20220228_124924_b7rkpeqg/suggest_log/0d581efe52275e8d8f22f62cfbe9319d.json]

{"meta": {"args": {"--uuid": "0d581efe52275e8d8f22f62cfbe9319d", "-db-root": "/home/damon_falck/blackboxbandits/experiments/saved_results", "--opt-root": "/home/damon_falck/blackboxbandits/experiments", "--data-root": "/home/damon_falck/blackboxbandits/experiments/penn_datasets", "--db": "bo_20220228_124924_b7rkpeqg", "--opt": "OpenTuner-GA", "--data": "clf-hayes-roth", "--classifier": "lasso", "--metric": "nll", "--calls": 20, "--suggestions": 1, "--jobs-file": null, "--verbose": false, "dry_run": false, "rev": "bd14afd", "opt_rev": "0.8.7"}, "signature": [[{"C": 1.5676677195506077, "intercept_scaling": 7.257005721594282}, {"C": 2.57663857461359, "intercept_scaling": 1.5119336467641016}, {"C": 0.49501595537331966, "intercept_scaling": 3.833332156156665}, {"C": 0.5627932047415171, "intercept_scaling": 36.905577292137636}, {"C": 71.55682161754872, "intercept_scaling": 0.34179529120610125}], [0.8232678456072717, 0.8251772340270629, 0.8270858341199812, 0.8237827669144975, 0.8330413036964739]]},
"data": {"coords": {"iter": {"dims": ["iter"], "attrs": {}, "data": [0, 1, 2, 3, 4, 5, 6, 7, 8, 9, 10, 11, 12, 13, 14, 15, 16, 17, 18, 19]}, "suggestion": {"dims": ["suggestion"], "attrs": {}, "data": [0]}}, "attrs": {}, "dims": {"iter": 20, "suggestion": 1}, "data_vars": {"C": {"dims": ["iter", "suggestion"], "attrs": {}, "data": [[2.7960455255416794], [1.659480482022705], [9.416033373243398], [1.659480482022705], [55.993457560246355], [1.659480482022705], [28.410110689144418], [11.720550381483578], [1.659480482022705], [6.128196277767876], [21.62745335372133], [1.659480482022705], [1.659480482022705], [0.2973581199316444], [7.50025408060047], [10.054355195226195], [9.199420972897281], [3.500067076712673], [1.659480482022705], [50.098510373282025]]}, "intercept_scaling": {"dims": ["iter", "suggestion"], "attrs": {}, "data": [[6.694536531650815], [1.1540958431137607], [1.5861710187496196], [8.422408066003625], [94.59714200802848], [0.7220781964726322], [4.72101966274517], [1.3361489963372406], [2.4552113736669448], [2.4552113736669448], [2.4552113736669448], [49.01835059444194], [5.867414666928902], [1.933291133425169], [2.4552113736669448], [3.78557739865429], [2.4552113736669448], [19.426316384644515], [12.8013875769238], [2.4552113736669448]]}}}}
