# Supplementary material
Source: ML conference proceedings conference paper supplement (https://proceedings.neurips.cc/paper_files/paper/2022/hash/31a57804448363bcab777f818f75f5b4-Abstract.html)
Supplement: Supplementary file 1 [file 31a57804448363bcab777f818f75f5b4-Supplemental-Conference.zip › trading_off_resource_budgets_f-Supplementary Material/code_and_data/experiments/base_results/bo_20220228_124924_b7rkpeqg/suggest_log/0d1306a861ea5c4dbc396e75ec114ef1.json]

{"meta": {"args": {"--uuid": "0d1306a861ea5c4dbc396e75ec114ef1", "-db-root": "/home/damon_falck/blackboxbandits/experiments/saved_results", "--opt-root": "/home/damon_falck/blackboxbandits/experiments", "--data-root": "/home/damon_falck/blackboxbandits/experiments/penn_datasets", "--db": "bo_20220228_124924_b7rkpeqg", "--opt": "OpenTuner-BanditA", "--data": "clf-solar-flare-1", "--classifier": "MLP-adam", "--metric": "nll", "--calls": 20, "--suggestions": 1, "--jobs-file": null, "--verbose": false, "dry_run": false, "rev": "bd14afd", "opt_rev": "0.8.7"}, "signature": [[{"alpha": 0.019628224813442792, "batch_size": 182, "beta_1": 0.9410202200271762, "beta_2": 0.9998021557676793, "epsilon": 1.8662266976518e-08, "hidden_layer_sizes": 147, "learning_rate_init": 0.0005627932047415167, "tol": 0.03690557729213761, "validation_fraction": 0.8846827852548593}, {"alpha": 0.001998246739232944, "batch_size": 200, "beta_1": 0.919111482530466, "beta_2": 0.9998488260436156, "epsilon": 5.981221901152555e-07, "hidden_layer_sizes": 61, "learning_rate_init": 2.2310905607443014e-05, "tol": 1.2046852412030316e-05, "validation_fraction": 0.8117896445826539}, {"alpha": 0.46659545670218433, "batch_size": 219, "beta_1": 0.9889789783750891, "beta_2": 0.9999896868093284, "epsilon": 2.4234724484675948e-08, "hidden_layer_sizes": 167, "learning_rate_init": 2.972334644335654e-05, "tol": 0.0036281404040243792, "validation_fraction": 0.17260651658522078}, {"alpha": 4.656005689076002, "batch_size": 135, "beta_1": 0.870503881627747, "beta_2": 0.9948873266941017, "epsilon": 2.1023308743480125e-07, "hidden_layer_sizes": 118, "learning_rate_init": 0.001878173875716191, "tol": 1.1889379831773006e-05, "validation_fraction": 0.6264327093752792}, {"alpha": 0.04705159350400542, "batch_size": 158, "beta_1": 0.9870884262730957, "beta_2": 0.9999596874382349, "epsilon": 1.1981845126013875e-08, "hidden_layer_sizes": 116, "learning_rate_init": 0.006173405204074311, "tol": 1.7414134181586194e-05, "validation_fraction": 0.6754299026638921}], [1.5270488268902294, 1.9093325809796196, 1.816795853264275, 0.8963941947245677, 0.9598595687271805]]},
"data": {"coords": {"iter": {"dims": ["iter"], "attrs": {}, "data": [0, 1, 2, 3, 4, 5, 6, 7, 8, 9, 10, 11, 12, 13, 14, 15, 16, 17, 18, 19]}, "suggestion": {"dims": ["suggestion"], "attrs": {}, "data": [0]}}, "attrs": {}, "dims": {"iter": 20, "suggestion": 1}, "data_vars": {"alpha": {"dims": ["iter", "suggestion"], "attrs": {}, "data": [[7.345627660354554], [7.345627660354554], [1.3997065458090643], [1.3997065458090643], [5.079892728033225], [2.6309332370761696], [7.268993109311097], [2.8664960542024365], [0.48917865862001525], [8.620216553516396], [5.014783191635554], [0.9327148275305078], [0.12009590025745413], [0.12727742876398324], [2.9109896686004766], [0.4885209564116408], [0.5410488564202068], [1.4621306005797678], [0.7821105170486197], [1e-05]]}, "batch_size": {"dims": ["iter", "suggestion"], "attrs": {}, "data": [[33], [33], [238], [63], [101], [247], [140], [173], [246], [51], [48], [33], [165], [79], [91], [153], [236], [48], [139], [92]]}, "beta_1": {"dims": ["iter", "suggestion"], "attrs": {}, "data": [[0.7127902716244727], [0.7320274635059418], [0.9329886245650825], [0.5635246546524403], [0.7635312354096195], [0.9091941608203964], [0.7402843027358375], [0.5244878282096564], [0.7175599627619322], [0.5714360856054468], [0.7991759724794724], [0.7363251746055455], [0.5451629638378628], [0.6062391104582059], [0.9545453717103957], [0.5961603448468871], [0.5064701906687468], [0.9565776737740217], [0.5530881730808574], [0.99]]}, "beta_2": {"dims": ["iter", "suggestion"], "attrs": {}, "data": [[0.9293036493416195], [0.9293036493416195], [0.927909844588818], [0.927909844588818], [0.9233136985520989], [0.9358328950129615], [0.9816395903915099], [0.9909927608989396], [0.9887429370984918], [0.9858289765198549], [0.962762792823425], [0.9828413925489506], [0.9047691543305525], [0.9681004350976878], [0.9507610625113071], [0.9148832007288937], [0.9901003481933175], [0.9392013208111774], [0.9568433501327887], [0.9]]}, "epsilon": {"dims": ["iter", "suggestion"], "attrs": {}, "data": [[3.831041634211042e-07], [4.100119236632717e-07], [7.014991946502059e-07], [7.014991946502059e-07], [8.669902854812884e-07], [6.630134951340617e-07], [7.598642709777104e-07], [9.056718307814671e-07], [3.112171990398972e-07], [3.7808690303617234e-07], [6.076864359777213e-07], [8.560518406647e-07], [9.031352784799319e-07], [7.212975473852291e-07], [3.590640357547793e-07], [1.3578249738518854e-07], [2.2467453592549645e-08], [1.8733230203235484e-07], [2.1286228030741426e-08], [1e-09]]}, "hidden_layer_sizes": {"dims": ["iter", "suggestion"], "attrs": {}, "data": [[161], [156], [56], [56], [185], [170], [189], [68], [70], [102], [99], [84], [53], [155], [166], [157], [90], [174], [88], [200]]}, "learning_rate_init": {"dims": ["iter", "suggestion"], "attrs": {}, "data": [[0.015750348348923127], [0.015750348348923127], [0.06599759632524875], [0.06599759632524875], [0.01951055145536589], [0.04935089799790265], [0.038989205036336676], [0.09910029498425292], [0.06887810921563557], [0.09937719038344921], [0.03613052742394245], [0.0022916193846071365], [0.01618292891003763], [0.049532786107275566], [0.004260260462103305], [0.057185972495171926], [0.0553811394014973], [0.03744732876167072], [0.08855255857028037], [1e-05]]}, "tol": {"dims": ["iter", "suggestion"], "attrs": {}, "data": [[0.06975050380927177], [0.06250236360405374], [0.0951463764808295], [0.0951463764808295], [0.03869451366852899], [0.09587007744987656], [0.08928518439136683], [0.037411006550776164], [0.08908371043183065], [0.09671474959784769], [0.028716323886388274], [0.06487098945624085], [0.06133897741712129], [0.0508986412873153], [0.04658319954718653], [0.005547308150266762], [0.07176952290729159], [0.019053098023445948], [0.019227978195923635], [0.06081215344606788]]}, "validation_fraction": {"dims": ["iter", "suggestion"], "attrs": {}, "data": [[0.8760824508294721], [0.8900643494551698], [0.7849303689077435], [0.7849303689077435], [0.37666726152443375], [0.3631595364048791], [0.2912840580693401], [0.8951746210950978], [0.4170252964501501], [0.7628902602588018], [0.3045614953758451], [0.1708378378201993], [0.4452148498327748], [0.19235510141788367], [0.803522708954965], [0.12333350485306252], [0.4046109856381497], [0.2222850212260161], [0.6501293298164301], [0.1]]}}}}
