# Supplementary material
Source: ML conference proceedings conference paper supplement (https://proceedings.neurips.cc/paper_files/paper/2022/hash/31a57804448363bcab777f818f75f5b4-Abstract.html)
Supplement: Supplementary file 1 [file 31a57804448363bcab777f818f75f5b4-Supplemental-Conference.zip › trading_off_resource_budgets_f-Supplementary Material/code_and_data/experiments/base_results/bo_20220228_124924_b7rkpeqg/suggest_log/0da8df9b9c50565198db38b7fa9ef5e3.json]

{"meta": {"args": {"--uuid": "0da8df9b9c50565198db38b7fa9ef5e3", "-db-root": "/home/damon_falck/blackboxbandits/experiments/saved_results", "--opt-root": "/home/damon_falck/blackboxbandits/experiments", "--data-root": "/home/damon_falck/blackboxbandits/experiments/penn_datasets", "--db": "bo_20220228_124924_b7rkpeqg", "--opt": "RandomSearch", "--data": "reg-589-fri-c2-1000-25", "--classifier": "lasso", "--metric": "mse", "--calls": 20, "--suggestions": 1, "--jobs-file": null, "--verbose": false, "dry_run": false, "rev": "bd14afd", "opt_rev": "0.0.8"}, "signature": [[{"alpha": 1.5676677195506077, "fit_intercept": true, "max_iter": 423, "normalize": true, "positive": false, "tol": 0.0038333321561566623}, {"alpha": 0.5627932047415171, "fit_intercept": true, "max_iter": 3989, "normalize": false, "positive": true, "tol": 0.001304907355036239}, {"alpha": 1.871450068624068, "fit_intercept": true, "max_iter": 16, "normalize": false, "positive": false, "tol": 0.021403233140986057}, {"alpha": 12.960656597279737, "fit_intercept": true, "max_iter": 4378, "normalize": true, "positive": false, "tol": 0.013246974647468445}, {"alpha": 0.029723346443356558, "fit_intercept": true, "max_iter": 24, "normalize": true, "positive": true, "tol": 0.00045566719139214756}], [1.0317609789140894, 1.0317609789140894, 1.0317609789140894, 1.0317609789140894, 1.0317609789140894]]},
"data": {"coords": {"iter": {"dims": ["iter"], "attrs": {}, "data": [0, 1, 2, 3, 4, 5, 6, 7, 8, 9, 10, 11, 12, 13, 14, 15, 16, 17, 18, 19]}, "suggestion": {"dims": ["suggestion"], "attrs": {}, "data": [0]}}, "attrs": {}, "dims": {"iter": 20, "suggestion": 1}, "data_vars": {"alpha": {"dims": ["iter", "suggestion"], "attrs": {}, "data": [[1.850966475052514], [0.1974380624513096], [2.3003829413500276], [1.9171164651018955], [6.792281474877598], [0.015253100755817386], [1.1984847297624508], [0.11642713494727304], [8.276932550858964], [0.046135871737758974], [0.15778070996802523], [19.83561478308932], [0.11924345338897921], [54.42105826428115], [0.0976992844711066], [0.011209470974249321], [0.2025681549696852], [58.2963616607674], [22.614256232018192], [0.01854679425985772]]}, "fit_intercept": {"dims": ["iter", "suggestion"], "attrs": {}, "data": [[true], [true], [false], [false], [true], [false], [false], [true], [true], [false], [true], [false], [true], [false], [false], [false], [true], [false], [false], [true]]}, "max_iter": {"dims": ["iter", "suggestion"], "attrs": {}, "data": [[3029], [43], [30], [19], [138], [13], [45], [383], [27], [116], [260], [2389], [4113], [369], [44], [268], [196], [27], [117], [78]]}, "normalize": {"dims": ["iter", "suggestion"], "attrs": {}, "data": [[false], [false], [true], [true], [false], [false], [true], [false], [true], [true], [true], [true], [true], [true], [false], [true], [true], [true], [true], [false]]}, "positive": {"dims": ["iter", "suggestion"], "attrs": {}, "data": [[false], [false], [true], [true], [false], [true], [true], [false], [true], [false], [true], [true], [true], [false], [true], [true], [false], [true], [true], [true]]}, "tol": {"dims": ["iter", "suggestion"], "attrs": {}, "data": [[0.0008737790457986088], [1.3037863688299176e-05], [0.0027764343490361896], [0.00038884693986966255], [0.03645351297972518], [0.0009416765982294484], [0.028431863527219138], [0.02471312041369937], [0.007879959196354931], [0.002585262768243786], [0.04784816540128603], [0.00022149272302736958], [0.0009107309650083746], [0.002846663643640651], [0.013842084394950601], [0.02382734932361625], [0.02200177703671059], [0.0012484267257376284], [0.0016077716041832705], [4.711364492180273e-05]]}}}}
