# Supplementary material
Source: ML conference proceedings conference paper supplement (https://proceedings.neurips.cc/paper_files/paper/2022/hash/31a57804448363bcab777f818f75f5b4-Abstract.html)
Supplement: Supplementary file 1 [file 31a57804448363bcab777f818f75f5b4-Supplemental-Conference.zip › trading_off_resource_budgets_f-Supplementary Material/code_and_data/experiments/base_results/bo_20220228_124924_b7rkpeqg/suggest_log/0da4241049db5c7c827dbe591cf53667.json]

{"meta": {"args": {"--uuid": "0da4241049db5c7c827dbe591cf53667", "-db-root": "/home/damon_falck/blackboxbandits/experiments/saved_results", "--opt-root": "/home/damon_falck/blackboxbandits/experiments", "--data-root": "/home/damon_falck/blackboxbandits/experiments/penn_datasets", "--db": "bo_20220228_124924_b7rkpeqg", "--opt": "Scikit-GP-LCB", "--data": "clf-collins", "--classifier": "MLP-adam", "--metric": "nll", "--calls": 20, "--suggestions": 1, "--jobs-file": null, "--verbose": false, "dry_run": false, "rev": "bd14afd", "opt_rev": "0.9.0"}, "signature": [[{"alpha": 0.019628224813442792, "batch_size": 182, "beta_1": 0.9410202200271762, "beta_2": 0.9998021557676793, "epsilon": 1.8662266976518e-08, "hidden_layer_sizes": 147, "learning_rate_init": 0.0005627932047415167, "tol": 0.03690557729213761, "validation_fraction": 0.8846827852548593}, {"alpha": 0.001998246739232944, "batch_size": 200, "beta_1": 0.919111482530466, "beta_2": 0.9998488260436156, "epsilon": 5.981221901152555e-07, "hidden_layer_sizes": 61, "learning_rate_init": 2.2310905607443014e-05, "tol": 1.2046852412030316e-05, "validation_fraction": 0.8117896445826539}, {"alpha": 0.46659545670218433, "batch_size": 219, "beta_1": 0.9889789783750891, "beta_2": 0.9999896868093284, "epsilon": 2.4234724484675948e-08, "hidden_layer_sizes": 167, "learning_rate_init": 2.972334644335654e-05, "tol": 0.0036281404040243792, "validation_fraction": 0.17260651658522078}, {"alpha": 4.656005689076002, "batch_size": 135, "beta_1": 0.870503881627747, "beta_2": 0.9948873266941017, "epsilon": 2.1023308743480125e-07, "hidden_layer_sizes": 118, "learning_rate_init": 0.001878173875716191, "tol": 1.1889379831773006e-05, "validation_fraction": 0.6264327093752792}, {"alpha": 0.04705159350400542, "batch_size": 158, "beta_1": 0.9870884262730957, "beta_2": 0.9999596874382349, "epsilon": 1.1981845126013875e-08, "hidden_layer_sizes": 116, "learning_rate_init": 0.006173405204074311, "tol": 1.7414134181586194e-05, "validation_fraction": 0.6754299026638921}], [2.3476125625279627, 2.631024052324769, 2.5602094868590592, 0.6129334980887647, 0.2812169809984194]]},
"data": {"coords": {"iter": {"dims": ["iter"], "attrs": {}, "data": [0, 1, 2, 3, 4, 5, 6, 7, 8, 9, 10, 11, 12, 13, 14, 15, 16, 17, 18, 19]}, "suggestion": {"dims": ["suggestion"], "attrs": {}, "data": [0]}}, "attrs": {}, "dims": {"iter": 20, "suggestion": 1}, "data_vars": {"alpha": {"dims": ["iter", "suggestion"], "attrs": {}, "data": [[0.00025772410803629494], [0.06919260122363667], [0.24220000441813092], [0.0218444870617241], [0.0075881522755937205], [1e-05], [10.0], [1e-05], [10.0], [10.0], [1e-05], [0.4471084472507364], [10.0], [0.3713707942423518], [1e-05], [10.0], [0.005429009121700049], [0.0980733736067522], [0.007270339438207943], [0.25333795541818016]]}, "batch_size": {"dims": ["iter", "suggestion"], "attrs": {}, "data": [[170], [120], [177], [197], [97], [250], [202], [10], [250], [250], [182], [102], [16], [141], [177], [10], [54], [250], [250], [250]]}, "beta_1": {"dims": ["iter", "suggestion"], "attrs": {}, "data": [[0.663117935161446], [0.5980389402138546], [0.9054537369788612], [0.7305869015372153], [0.8996230104288947], [0.99], [0.9879425437472992], [0.99], [0.963169842818813], [0.5], [0.99], [0.7424500690251885], [0.5], [0.99], [0.99], [0.5], [0.7445077820978002], [0.99], [0.7191134423271777], [0.7627848734302507]]}, "beta_2": {"dims": ["iter", "suggestion"], "attrs": {}, "data": [[0.9409326038694641], [0.9038849298533933], [0.9376672286066174], [0.9470709705119309], [0.9300020651411836], [0.999999], [0.999999], [0.999999], [0.999999], [0.9], [0.9], [0.9048360233988523], [0.9], [0.999999], [0.9420304460840456], [0.9], [0.9030599382224782], [0.9461338364059032], [0.9212985375548998], [0.999999]]}, "epsilon": {"dims": ["iter", "suggestion"], "attrs": {}, "data": [[2.2675704142252425e-09], [5.894749392649498e-08], [1.3225543850558767e-08], [6.001417662700923e-08], [5.822709510929217e-09], [1e-09], [1.7721772580400733e-07], [1e-09], [2.4272181672190155e-08], [1e-06], [1.3531541944569802e-07], [1.0985666301528087e-08], [1e-06], [1e-09], [1e-09], [2.2286177888016006e-09], [1.2555548116694576e-08], [5.902554074238039e-07], [1.3025535711120793e-07], [3.1912655983664574e-09]]}, "hidden_layer_sizes": {"dims": ["iter", "suggestion"], "attrs": {}, "data": [[93], [94], [183], [81], [56], [200], [200], [200], [200], [200], [50], [135], [50], [68], [50], [118], [80], [192], [50], [50]]}, "learning_rate_init": {"dims": ["iter", "suggestion"], "attrs": {}, "data": [[3.092600445902621e-05], [0.020469083211365608], [0.000561171502952117], [3.894773191562443e-05], [0.0012882498598463235], [0.1], [0.010647249365412637], [0.029367296583576494], [0.1], [0.1], [1.0175010865381328e-05], [5.320691986582796e-05], [0.1], [0.1], [0.1], [0.07218066749233863], [2.7872082785140102e-05], [0.054078237077266875], [0.027716514749756824], [0.013340625867217291]]}, "tol": {"dims": ["iter", "suggestion"], "attrs": {}, "data": [[0.0018421700442044096], [0.0015257296345637906], [2.8876253348675337e-05], [0.003995558047847908], [0.045251673808142136], [1e-05], [1e-05], [0.04804376433504003], [1e-05], [0.1], [0.017780207581805773], [0.0010280816844266385], [1e-05], [1e-05], [1e-05], [0.1], [0.0023896972837472276], [0.0007191277978603406], [1e-05], [2.3261764307113533e-05]]}, "validation_fraction": {"dims": ["iter", "suggestion"], "attrs": {}, "data": [[0.7415151315213815], [0.3656856592776815], [0.11310607936561476], [0.5051613172779608], [0.2581356806815566], [0.1], [0.3661426984815573], [0.9], [0.29331023958008734], [0.1], [0.20607591872839173], [0.615501805320559], [0.1], [0.1], [0.9], [0.17804350074338487], [0.10765007995312699], [0.6207509383582129], [0.1], [0.2616733784943707]]}}}}
