# Supplementary material
Source: ML conference proceedings conference paper supplement (https://proceedings.neurips.cc/paper_files/paper/2022/hash/31a57804448363bcab777f818f75f5b4-Abstract.html)
Supplement: Supplementary file 1 [file 31a57804448363bcab777f818f75f5b4-Supplemental-Conference.zip › trading_off_resource_budgets_f-Supplementary Material/code_and_data/experiments/base_results/bo_20220228_124924_b7rkpeqg/suggest_log/0dbc8798204b58c9ba0e5f7d434b6f46.json]

{"meta": {"args": {"--uuid": "0dbc8798204b58c9ba0e5f7d434b6f46", "-db-root": "/home/damon_falck/blackboxbandits/experiments/saved_results", "--opt-root": "/home/damon_falck/blackboxbandits/experiments", "--data-root": "/home/damon_falck/blackboxbandits/experiments/penn_datasets", "--db": "bo_20220228_124924_b7rkpeqg", "--opt": "Scikit-GBRT-Hedge", "--data": "clf-spect", "--classifier": "lasso", "--metric": "nll", "--calls": 20, "--suggestions": 1, "--jobs-file": null, "--verbose": false, "dry_run": false, "rev": "bd14afd", "opt_rev": "0.9.0"}, "signature": [[{"C": 1.5676677195506077, "intercept_scaling": 7.257005721594282}, {"C": 2.57663857461359, "intercept_scaling": 1.5119336467641016}, {"C": 0.49501595537331966, "intercept_scaling": 3.833332156156665}, {"C": 0.5627932047415171, "intercept_scaling": 36.905577292137636}, {"C": 71.55682161754872, "intercept_scaling": 0.34179529120610125}], [0.4457591027753918, 0.46776188844630456, 0.395507587299036, 0.39802709852015183, 0.5533152937321719]]},
"data": {"coords": {"iter": {"dims": ["iter"], "attrs": {}, "data": [0, 1, 2, 3, 4, 5, 6, 7, 8, 9, 10, 11, 12, 13, 14, 15, 16, 17, 18, 19]}, "suggestion": {"dims": ["suggestion"], "attrs": {}, "data": [0]}}, "attrs": {}, "dims": {"iter": 20, "suggestion": 1}, "data_vars": {"C": {"dims": ["iter", "suggestion"], "attrs": {}, "data": [[0.023606382568670002], [1.2452533204413743], [0.010533101890343868], [0.07195717891192986], [76.83246331283429], [1.2532372993111789], [1.0917666111364497], [0.5305387083147595], [0.20858635708725293], [0.14081010711208244], [0.039359957103775815], [0.4622218077529525], [96.28002676790706], [0.42235336283925856], [0.2646311857770285], [0.2375843961642519], [0.20328881382413513], [86.59189151970669], [0.7223925720592282], [0.2968124837068829]]}, "intercept_scaling": {"dims": ["iter", "suggestion"], "attrs": {}, "data": [[0.020690223767686935], [0.02050127831025853], [89.82385412064673], [10.058111073711734], [0.012221861908720228], [2.037599234083319], [10.575864975994804], [25.740327342123347], [32.09565969415044], [48.125284760129816], [33.771881091951826], [32.09452119998456], [32.689726818463235], [75.93586171296235], [98.36700684036704], [29.734076584248484], [96.04354151810197], [1.5862921206539788], [93.70445945603477], [99.17512403547354]]}}}}
