# Supplementary material
Source: ML conference proceedings conference paper supplement (https://proceedings.neurips.cc/paper_files/paper/2022/hash/31a57804448363bcab777f818f75f5b4-Abstract.html)
Supplement: Supplementary file 1 [file 31a57804448363bcab777f818f75f5b4-Supplemental-Conference.zip › trading_off_resource_budgets_f-Supplementary Material/code_and_data/experiments/base_results/bo_20220228_124924_b7rkpeqg/suggest_log/0de70855eb8253b191a174541eed1f8e.json]

{"meta": {"args": {"--uuid": "0de70855eb8253b191a174541eed1f8e", "-db-root": "/home/damon_falck/blackboxbandits/experiments/saved_results", "--opt-root": "/home/damon_falck/blackboxbandits/experiments", "--data-root": "/home/damon_falck/blackboxbandits/experiments/penn_datasets", "--db": "bo_20220228_124924_b7rkpeqg", "--opt": "Scikit-GP-LCB", "--data": "reg-579-fri-c0-250-5", "--classifier": "MLP-adam", "--metric": "mse", "--calls": 20, "--suggestions": 1, "--jobs-file": null, "--verbose": false, "dry_run": false, "rev": "bd14afd", "opt_rev": "0.9.0"}, "signature": [[{"alpha": 0.019628224813442792, "batch_size": 182, "beta_1": 0.9410202200271762, "beta_2": 0.9998021557676793, "epsilon": 1.8662266976518e-08, "hidden_layer_sizes": 147, "learning_rate_init": 0.0005627932047415167, "tol": 0.03690557729213761, "validation_fraction": 0.8846827852548593}, {"alpha": 0.001998246739232944, "batch_size": 200, "beta_1": 0.919111482530466, "beta_2": 0.9998488260436156, "epsilon": 5.981221901152555e-07, "hidden_layer_sizes": 61, "learning_rate_init": 2.2310905607443014e-05, "tol": 1.2046852412030316e-05, "validation_fraction": 0.8117896445826539}, {"alpha": 0.46659545670218433, "batch_size": 219, "beta_1": 0.9889789783750891, "beta_2": 0.9999896868093284, "epsilon": 2.4234724484675948e-08, "hidden_layer_sizes": 167, "learning_rate_init": 2.972334644335654e-05, "tol": 0.0036281404040243792, "validation_fraction": 0.17260651658522078}, {"alpha": 4.656005689076002, "batch_size": 135, "beta_1": 0.870503881627747, "beta_2": 0.9948873266941017, "epsilon": 2.1023308743480125e-07, "hidden_layer_sizes": 118, "learning_rate_init": 0.001878173875716191, "tol": 1.1889379831773006e-05, "validation_fraction": 0.6264327093752792}, {"alpha": 0.04705159350400542, "batch_size": 158, "beta_1": 0.9870884262730957, "beta_2": 0.9999596874382349, "epsilon": 1.1981845126013875e-08, "hidden_layer_sizes": 116, "learning_rate_init": 0.006173405204074311, "tol": 1.7414134181586194e-05, "validation_fraction": 0.6754299026638921}], [0.8956782199527653, 1.1887942701416012, 1.0434116738572496, 0.32136256630853594, 0.35361573867199747]]},
"data": {"coords": {"iter": {"dims": ["iter"], "attrs": {}, "data": [0, 1, 2, 3, 4, 5, 6, 7, 8, 9, 10, 11, 12, 13, 14, 15, 16, 17, 18, 19]}, "suggestion": {"dims": ["suggestion"], "attrs": {}, "data": [0]}}, "attrs": {}, "dims": {"iter": 20, "suggestion": 1}, "data_vars": {"alpha": {"dims": ["iter", "suggestion"], "attrs": {}, "data": [[0.03965560812690574], [0.4100402489918629], [0.035178661521174], [0.023755939034722475], [0.009556337021198477], [10.0], [1e-05], [1e-05], [10.0], [1e-05], [1e-05], [1e-05], [1e-05], [1e-05], [1e-05], [1e-05], [1e-05], [0.20173326485173113], [10.0], [1e-05]]}, "batch_size": {"dims": ["iter", "suggestion"], "attrs": {}, "data": [[174], [58], [130], [110], [48], [10], [250], [250], [250], [10], [10], [250], [118], [28], [132], [250], [10], [10], [104], [198]]}, "beta_1": {"dims": ["iter", "suggestion"], "attrs": {}, "data": [[0.6878251543952412], [0.7389300944725099], [0.8195494138899895], [0.5758807632046474], [0.5593801935098038], [0.5], [0.99], [0.99], [0.5], [0.99], [0.99], [0.9885143190934322], [0.99], [0.99], [0.9701338172331027], [0.99], [0.99], [0.7277341773125452], [0.5], [0.8965649632797501]]}, "beta_2": {"dims": ["iter", "suggestion"], "attrs": {}, "data": [[0.9082684006832347], [0.9030984645679799], [0.9962832007995677], [0.9322505772400359], [0.9327139481208647], [0.9], [0.9], [0.9], [0.9], [0.999999], [0.9], [0.9208928547172401], [0.999999], [0.999999], [0.9], [0.999999], [0.9], [0.9], [0.9965681082865914], [0.999999]]}, "epsilon": {"dims": ["iter", "suggestion"], "attrs": {}, "data": [[1.0277621109503113e-07], [7.940934385014973e-08], [3.387623051387647e-08], [7.271760371164244e-07], [5.998785342016078e-07], [1e-09], [1e-06], [1e-06], [1e-06], [1e-09], [1e-06], [1e-06], [1.988319653459883e-09], [9.928811117610585e-07], [3.6969915896732835e-07], [1.4616644949949101e-09], [1e-06], [3.4887727319706115e-09], [8.843235196069832e-09], [1.1073130461518767e-07]]}, "hidden_layer_sizes": {"dims": ["iter", "suggestion"], "attrs": {}, "data": [[93], [64], [90], [196], [177], [200], [50], [50], [200], [50], [50], [50], [50], [50], [50], [50], [50], [89], [81], [50]]}, "learning_rate_init": {"dims": ["iter", "suggestion"], "attrs": {}, "data": [[0.004502438585124273], [0.013494564387080937], [0.00014698320156647602], [9.53960211064386e-05], [0.006300953379793458], [1e-05], [0.1], [0.1], [0.1], [0.1], [0.0025972610074300713], [0.005668443530610475], [0.1], [0.0012929550703695387], [0.1], [0.003404463979127191], [0.1], [0.007183807038684014], [0.0011058566957952637], [0.012462010025685807]]}, "tol": {"dims": ["iter", "suggestion"], "attrs": {}, "data": [[0.02022390005180331], [0.07861746996802044], [0.0003065518904654972], [0.0006068451263469978], [0.016265158834897354], [0.1], [1e-05], [0.1], [1e-05], [1e-05], [1e-05], [1e-05], [1e-05], [1e-05], [1e-05], [1e-05], [1e-05], [0.1], [1e-05], [1e-05]]}, "validation_fraction": {"dims": ["iter", "suggestion"], "attrs": {}, "data": [[0.14792287447620997], [0.4436397400797431], [0.8083283379655665], [0.17454095544611303], [0.35929760090260116], [0.9], [0.1], [0.1], [0.1], [0.9], [0.1], [0.9], [0.2618979156180814], [0.1], [0.29306042607723004], [0.3528491478688052], [0.15990882627098763], [0.2559558057519605], [0.276886615122778], [0.1]]}}}}
