# Supplementary material
Source: ML conference proceedings conference paper supplement (https://proceedings.neurips.cc/paper_files/paper/2022/hash/31a57804448363bcab777f818f75f5b4-Abstract.html)
Supplement: Supplementary file 1 [file 31a57804448363bcab777f818f75f5b4-Supplemental-Conference.zip › trading_off_resource_budgets_f-Supplementary Material/code_and_data/experiments/base_results/bo_20220228_124924_b7rkpeqg/suggest_log/0ded79bc1e625d3185ced10904c5f988.json]

{"meta": {"args": {"--uuid": "0ded79bc1e625d3185ced10904c5f988", "-db-root": "/home/damon_falck/blackboxbandits/experiments/saved_results", "--opt-root": "/home/damon_falck/blackboxbandits/experiments", "--data-root": "/home/damon_falck/blackboxbandits/experiments/penn_datasets", "--db": "bo_20220228_124924_b7rkpeqg", "--opt": "RandomSearch", "--data": "clf-mux6", "--classifier": "lasso", "--metric": "nll", "--calls": 20, "--suggestions": 1, "--jobs-file": null, "--verbose": false, "dry_run": false, "rev": "bd14afd", "opt_rev": "0.0.8"}, "signature": [[{"C": 1.5676677195506077, "intercept_scaling": 7.257005721594282}, {"C": 2.57663857461359, "intercept_scaling": 1.5119336467641016}, {"C": 0.49501595537331966, "intercept_scaling": 3.833332156156665}, {"C": 0.5627932047415171, "intercept_scaling": 36.905577292137636}, {"C": 71.55682161754872, "intercept_scaling": 0.34179529120610125}], [0.5991953529980574, 0.6030257120450121, 0.581852005680175, 0.5852042491165765, 0.6115463027823484]]},
"data": {"coords": {"iter": {"dims": ["iter"], "attrs": {}, "data": [0, 1, 2, 3, 4, 5, 6, 7, 8, 9, 10, 11, 12, 13, 14, 15, 16, 17, 18, 19]}, "suggestion": {"dims": ["suggestion"], "attrs": {}, "data": [0]}}, "attrs": {}, "dims": {"iter": 20, "suggestion": 1}, "data_vars": {"C": {"dims": ["iter", "suggestion"], "attrs": {}, "data": [[0.18628935503436495], [35.36722887273853], [11.774915186791727], [76.12139848195262], [0.029318290435805642], [0.09497276842158812], [0.15777488457783928], [1.0282947949590262], [0.019606926568141787], [3.28355959286717], [66.94580699044626], [0.7950948171788544], [1.416662637141959], [0.10401348557118256], [2.615399173913357], [6.880109356420925], [0.7682012375275308], [8.765271988884273], [31.338436667360213], [0.02278628082038222]]}, "intercept_scaling": {"dims": ["iter", "suggestion"], "attrs": {}, "data": [[12.287421684093015], [3.026786769332306], [0.013135968665193717], [1.4659784557306283], [5.366328005782691], [1.770204460311485], [0.5193031017383531], [21.258278584460474], [5.784562961395859], [33.61852541873189], [58.164565160368866], [0.06537219940241165], [0.05635636777588729], [0.34424112210599533], [16.098211072805405], [33.02375380568068], [0.04506150173629889], [0.02780750001313104], [1.0955144700950843], [0.02345803001733562]]}}}}
