# Supplementary material
Source: ML conference proceedings conference paper supplement (https://proceedings.neurips.cc/paper_files/paper/2022/hash/31a57804448363bcab777f818f75f5b4-Abstract.html)
Supplement: Supplementary file 1 [file 31a57804448363bcab777f818f75f5b4-Supplemental-Conference.zip › trading_off_resource_budgets_f-Supplementary Material/code_and_data/experiments/base_results/bo_20220228_124924_b7rkpeqg/suggest_log/0def4476142c5067872e8a54f554d9e7.json]

{"meta": {"args": {"--uuid": "0def4476142c5067872e8a54f554d9e7", "-db-root": "/home/damon_falck/blackboxbandits/experiments/saved_results", "--opt-root": "/home/damon_falck/blackboxbandits/experiments", "--data-root": "/home/damon_falck/blackboxbandits/experiments/penn_datasets", "--db": "bo_20220228_124924_b7rkpeqg", "--opt": "OpenTuner-GA-DE", "--data": "clf-auto", "--classifier": "lasso", "--metric": "nll", "--calls": 20, "--suggestions": 1, "--jobs-file": null, "--verbose": false, "dry_run": false, "rev": "bd14afd", "opt_rev": "0.8.7"}, "signature": [[{"C": 1.5676677195506077, "intercept_scaling": 7.257005721594282}, {"C": 2.57663857461359, "intercept_scaling": 1.5119336467641016}, {"C": 0.49501595537331966, "intercept_scaling": 3.833332156156665}, {"C": 0.5627932047415171, "intercept_scaling": 36.905577292137636}, {"C": 71.55682161754872, "intercept_scaling": 0.34179529120610125}], [1.0407592588385761, 1.1140093954219166, 0.9314020593851703, 0.9422101731445011, 1.8905742304595008]]},
"data": {"coords": {"iter": {"dims": ["iter"], "attrs": {}, "data": [0, 1, 2, 3, 4, 5, 6, 7, 8, 9, 10, 11, 12, 13, 14, 15, 16, 17, 18, 19]}, "suggestion": {"dims": ["suggestion"], "attrs": {}, "data": [0]}}, "attrs": {}, "dims": {"iter": 20, "suggestion": 1}, "data_vars": {"C": {"dims": ["iter", "suggestion"], "attrs": {}, "data": [[1.64528103675175], [1.215668618655169], [10.433363536204546], [3.091276209694459], [1.2969070439561088], [0.12947651724549836], [2.807575324902606], [44.758323526806194], [25.69235026629298], [1.2969070439561088], [1.2969070439561088], [9.514889226760278], [1.2969070439561088], [1.5198409122652297], [7.958438543193788], [1.2969070439561088], [29.81297232129269], [1.2969070439561088], [46.76273703379262], [1.2969070439561088]]}, "intercept_scaling": {"dims": ["iter", "suggestion"], "attrs": {}, "data": [[32.09018304610382], [0.40835639893686637], [5.384933601576323], [69.01848372161814], [0.40835639893686637], [0.40835639893686637], [8.03760392169486], [13.688411612452107], [8.481676013424721], [0.3115178794425517], [1.3926151371955913], [1.3926151371955913], [3.437346526608115], [1.3926151371955913], [57.54846771633493], [0.4023944206726897], [1.3926151371955913], [51.81494017026664], [4.863330915303176], [13.296539578821129]]}}}}
