# Supplementary material
Source: ML conference proceedings conference paper supplement (https://proceedings.neurips.cc/paper_files/paper/2022/hash/31a57804448363bcab777f818f75f5b4-Abstract.html)
Supplement: Supplementary file 1 [file 31a57804448363bcab777f818f75f5b4-Supplemental-Conference.zip › trading_off_resource_budgets_f-Supplementary Material/code_and_data/experiments/base_results/bo_20220228_124924_b7rkpeqg/suggest_log/00df1d9395c054308243043434692224.json]

{"meta": {"args": {"--uuid": "00df1d9395c054308243043434692224", "-db-root": "/home/damon_falck/blackboxbandits/experiments/saved_results", "--opt-root": "/home/damon_falck/blackboxbandits/experiments", "--data-root": "/home/damon_falck/blackboxbandits/experiments/penn_datasets", "--db": "bo_20220228_124924_b7rkpeqg", "--opt": "OpenTuner-GA", "--data": "reg-523-analcatdata-neavote", "--classifier": "MLP-adam", "--metric": "mse", "--calls": 20, "--suggestions": 1, "--jobs-file": null, "--verbose": false, "dry_run": false, "rev": "bd14afd", "opt_rev": "0.8.7"}, "signature": [[{"alpha": 0.019628224813442792, "batch_size": 182, "beta_1": 0.9410202200271762, "beta_2": 0.9998021557676793, "epsilon": 1.8662266976518e-08, "hidden_layer_sizes": 147, "learning_rate_init": 0.0005627932047415167, "tol": 0.03690557729213761, "validation_fraction": 0.8846827852548593}, {"alpha": 0.001998246739232944, "batch_size": 200, "beta_1": 0.919111482530466, "beta_2": 0.9998488260436156, "epsilon": 5.981221901152555e-07, "hidden_layer_sizes": 61, "learning_rate_init": 2.2310905607443014e-05, "tol": 1.2046852412030316e-05, "validation_fraction": 0.8117896445826539}, {"alpha": 0.46659545670218433, "batch_size": 219, "beta_1": 0.9889789783750891, "beta_2": 0.9999896868093284, "epsilon": 2.4234724484675948e-08, "hidden_layer_sizes": 167, "learning_rate_init": 2.972334644335654e-05, "tol": 0.0036281404040243792, "validation_fraction": 0.17260651658522078}, {"alpha": 4.656005689076002, "batch_size": 135, "beta_1": 0.870503881627747, "beta_2": 0.9948873266941017, "epsilon": 2.1023308743480125e-07, "hidden_layer_sizes": 118, "learning_rate_init": 0.001878173875716191, "tol": 1.1889379831773006e-05, "validation_fraction": 0.6264327093752792}, {"alpha": 0.04705159350400542, "batch_size": 158, "beta_1": 0.9870884262730957, "beta_2": 0.9999596874382349, "epsilon": 1.1981845126013875e-08, "hidden_layer_sizes": 116, "learning_rate_init": 0.006173405204074311, "tol": 1.7414134181586194e-05, "validation_fraction": 0.6754299026638921}], [1.763062350688611, 4.373819420706367, 3.416699375981316, 0.1596246491994249, 0.4058134141289648]]},
"data": {"coords": {"iter": {"dims": ["iter"], "attrs": {}, "data": [0, 1, 2, 3, 4, 5, 6, 7, 8, 9, 10, 11, 12, 13, 14, 15, 16, 17, 18, 19]}, "suggestion": {"dims": ["suggestion"], "attrs": {}, "data": [0]}}, "attrs": {}, "dims": {"iter": 20, "suggestion": 1}, "data_vars": {"alpha": {"dims": ["iter", "suggestion"], "attrs": {}, "data": [[6.078807559998663], [7.980422218076042], [7.980422218076042], [7.980422218076042], [2.7089926319707973], [7.980422218076042], [2.0219380242717304], [2.071430803616957], [7.980422218076042], [3.8585015611792977], [0.35144739623630156], [0.8536002962969246], [3.827097154551413], [0.8369718394482385], [0.24332695648007813], [7.2887219256483355], [0.2184778555713704], [0.8536002962969246], [3.190188575766101], [0.19887247287954407]]}, "batch_size": {"dims": ["iter", "suggestion"], "attrs": {}, "data": [[227], [221], [109], [221], [127], [221], [83], [56], [221], [221], [221], [38], [38], [205], [207], [141], [167], [38], [199], [102]]}, "beta_1": {"dims": ["iter", "suggestion"], "attrs": {}, "data": [[0.6249286473218334], [0.5251555684108222], [0.5251555684108222], [0.5251555684108222], [0.5228676997846897], [0.5251555684108222], [0.9256419641481041], [0.8942147494459274], [0.5251555684108222], [0.5251555684108222], [0.5251555684108222], [0.6691217508162985], [0.6691217508162985], [0.794966680087748], [0.9822197527646384], [0.7792117507364172], [0.7031359813536008], [0.6691217508162985], [0.5265665510834363], [0.7760795164035105]]}, "beta_2": {"dims": ["iter", "suggestion"], "attrs": {}, "data": [[0.9508901442816119], [0.9011490642792385], [0.9011490642792385], [0.9866787665586312], [0.9892246739091576], [0.9011490642792385], [0.9652931633732612], [0.9588620532291972], [0.9011490642792385], [0.9011490642792385], [0.9011490642792385], [0.9729935070188322], [0.9729935070188322], [0.9413804791200666], [0.9521956092969807], [0.9285552514123698], [0.912140883820688], [0.9729935070188322], [0.9775639690705238], [0.9074635779976323]]}, "epsilon": {"dims": ["iter", "suggestion"], "attrs": {}, "data": [[3.268419341012342e-07], [4.0327768383083176e-07], [4.0327768383083176e-07], [4.0327768383083176e-07], [1.4768863604823878e-08], [4.0327768383083176e-07], [4.565118440219275e-07], [1.3403783852336437e-07], [4.0327768383083176e-07], [4.0327768383083176e-07], [4.0327768383083176e-07], [7.857452105913532e-07], [7.857452105913532e-07], [8.243167638760363e-07], [3.658297612116235e-08], [1.4170675358190953e-07], [9.726820229868826e-08], [7.857452105913532e-07], [9.746772286217389e-07], [5.188962051758017e-08]]}, "hidden_layer_sizes": {"dims": ["iter", "suggestion"], "attrs": {}, "data": [[166], [188], [188], [188], [165], [195], [152], [183], [188], [188], [188], [67], [67], [138], [81], [76], [61], [67], [176], [77]]}, "learning_rate_init": {"dims": ["iter", "suggestion"], "attrs": {}, "data": [[0.06432888832062093], [0.022807930128886534], [0.022807930128886534], [0.022807930128886534], [0.061590153994095], [0.022807930128886534], [0.05940779075059071], [0.0041136258364468554], [0.022807930128886534], [0.0796173909780377], [0.0796173909780377], [0.0957624705849817], [0.0957624705849817], [0.04669935057117785], [0.07117447440965667], [0.09677974750795852], [0.09493556828293596], [0.0957624705849817], [0.0871031966397801], [0.003785861798475111]]}, "tol": {"dims": ["iter", "suggestion"], "attrs": {}, "data": [[0.050971748289966916], [0.08722273433163445], [0.08722273433163445], [0.08722273433163445], [0.09588719399607186], [0.08722273433163445], [0.019822694931501617], [0.08652265170542954], [0.08722273433163445], [0.08722273433163445], [0.08722273433163445], [0.033507823943204444], [0.033507823943204444], [0.02371337086853591], [0.0023913156003553715], [0.03418523740726458], [0.025485902298249364], [0.04248163314670055], [0.0881476745191087], [0.08917246555789131]]}, "validation_fraction": {"dims": ["iter", "suggestion"], "attrs": {}, "data": [[0.5442968586982453], [0.35556556445779863], [0.35556556445779863], [0.35556556445779863], [0.6739611056829944], [0.8415001987141716], [0.4438050386079161], [0.5593467817794335], [0.10549152232017667], [0.35556556445779863], [0.35556556445779863], [0.46443429054316265], [0.46443429054316265], [0.21041692456179828], [0.21246871148021906], [0.277386223642042], [0.590020294931716], [0.46443429054316265], [0.347152968099316], [0.5014054542795665]]}}}}
