# Supplementary material
Source: ML conference proceedings conference paper supplement (https://proceedings.neurips.cc/paper_files/paper/2022/hash/31a57804448363bcab777f818f75f5b4-Abstract.html)
Supplement: Supplementary file 1 [file 31a57804448363bcab777f818f75f5b4-Supplemental-Conference.zip › trading_off_resource_budgets_f-Supplementary Material/code_and_data/experiments/base_results/bo_20220228_124924_b7rkpeqg/suggest_log/0dfc5d0db5535aa495c862695779ef1e.json]

{"meta": {"args": {"--uuid": "0dfc5d0db5535aa495c862695779ef1e", "-db-root": "/home/damon_falck/blackboxbandits/experiments/saved_results", "--opt-root": "/home/damon_falck/blackboxbandits/experiments", "--data-root": "/home/damon_falck/blackboxbandits/experiments/penn_datasets", "--db": "bo_20220228_124924_b7rkpeqg", "--opt": "OpenTuner-GA", "--data": "reg-604-fri-c4-500-10", "--classifier": "lasso", "--metric": "mse", "--calls": 20, "--suggestions": 1, "--jobs-file": null, "--verbose": false, "dry_run": false, "rev": "bd14afd", "opt_rev": "0.8.7"}, "signature": [[{"alpha": 1.5676677195506077, "fit_intercept": true, "max_iter": 423, "normalize": true, "positive": false, "tol": 0.0038333321561566623}, {"alpha": 0.5627932047415171, "fit_intercept": true, "max_iter": 3989, "normalize": false, "positive": true, "tol": 0.001304907355036239}, {"alpha": 1.871450068624068, "fit_intercept": true, "max_iter": 16, "normalize": false, "positive": false, "tol": 0.021403233140986057}, {"alpha": 12.960656597279737, "fit_intercept": true, "max_iter": 4378, "normalize": true, "positive": false, "tol": 0.013246974647468445}, {"alpha": 0.029723346443356558, "fit_intercept": true, "max_iter": 24, "normalize": true, "positive": true, "tol": 0.00045566719139214756}], [0.9894597456827883, 0.9894597456827883, 0.9894597456827883, 0.9894597456827883, 0.9894597456827883]]},
"data": {"coords": {"iter": {"dims": ["iter"], "attrs": {}, "data": [0, 1, 2, 3, 4, 5, 6, 7, 8, 9, 10, 11, 12, 13, 14, 15, 16, 17, 18, 19]}, "suggestion": {"dims": ["suggestion"], "attrs": {}, "data": [0]}}, "attrs": {}, "dims": {"iter": 20, "suggestion": 1}, "data_vars": {"alpha": {"dims": ["iter", "suggestion"], "attrs": {}, "data": [[57.89297359755946], [57.89297359755946], [57.89297359755946], [0.06059271024595602], [17.75261419189928], [66.29155189722555], [0.06059271024595602], [0.06059271024595602], [0.06059271024595602], [12.842141150904123], [63.76585010246786], [9.386035221384583], [0.06059271024595602], [0.06059271024595602], [30.948957186525806], [0.06059271024595602], [8.980026707961807], [8.980026707961807], [3.441606093379039], [49.523470742596146]]}, "fit_intercept": {"dims": ["iter", "suggestion"], "attrs": {}, "data": [[1], [1], [1], [0], [1], [1], [0], [0], [0], [0], [0], [0], [0], [0], [1], [0], [1], [1], [0], [1]]}, "max_iter": {"dims": ["iter", "suggestion"], "attrs": {}, "data": [[511], [511], [511], [10], [11], [260], [1799], [16], [10], [214], [114], [775], [1387], [10], [492], [10], [2114], [2114], [915], [11]]}, "normalize": {"dims": ["iter", "suggestion"], "attrs": {}, "data": [[1], [0], [1], [0], [1], [0], [0], [0], [1], [1], [0], [0], [0], [0], [1], [0], [0], [0], [0], [0]]}, "positive": {"dims": ["iter", "suggestion"], "attrs": {}, "data": [[1], [1], [1], [0], [0], [0], [0], [0], [0], [1], [1], [1], [0], [1], [0], [0], [0], [0], [1], [0]]}, "tol": {"dims": ["iter", "suggestion"], "attrs": {}, "data": [[0.06254589790292624], [0.06254589790292624], [0.05537015520207305], [0.041730080530439854], [0.07326867731578283], [0.06602754872528209], [0.041730080530439854], [0.041730080530439854], [0.041730080530439854], [0.024773920923590365], [0.021600486711659195], [0.013052842138971888], [0.041730080530439854], [0.041730080530439854], [0.004617428938369073], [0.03676652466756319], [0.04383170599398006], [0.04383170599398006], [0.06349923882493684], [0.04969521473746113]]}}}}
