# Supplementary material
Source: ML conference proceedings conference paper supplement (https://proceedings.neurips.cc/paper_files/paper/2022/hash/31a57804448363bcab777f818f75f5b4-Abstract.html)
Supplement: Supplementary file 1 [file 31a57804448363bcab777f818f75f5b4-Supplemental-Conference.zip › trading_off_resource_budgets_f-Supplementary Material/code_and_data/experiments/base_results/bo_20220228_124924_b7rkpeqg/suggest_log/0e0e61b5679c531abec4b55f758bb0c9.json]

{"meta": {"args": {"--uuid": "0e0e61b5679c531abec4b55f758bb0c9", "-db-root": "/home/damon_falck/blackboxbandits/experiments/saved_results", "--opt-root": "/home/damon_falck/blackboxbandits/experiments", "--data-root": "/home/damon_falck/blackboxbandits/experiments/penn_datasets", "--db": "bo_20220228_124924_b7rkpeqg", "--opt": "Scikit-GBRT-Hedge", "--data": "reg-557-analcatdata-apnea1", "--classifier": "lasso", "--metric": "mse", "--calls": 20, "--suggestions": 1, "--jobs-file": null, "--verbose": false, "dry_run": false, "rev": "bd14afd", "opt_rev": "0.9.0"}, "signature": [[{"alpha": 1.5676677195506077, "fit_intercept": true, "max_iter": 423, "normalize": true, "positive": false, "tol": 0.0038333321561566623}, {"alpha": 0.5627932047415171, "fit_intercept": true, "max_iter": 3989, "normalize": false, "positive": true, "tol": 0.001304907355036239}, {"alpha": 1.871450068624068, "fit_intercept": true, "max_iter": 16, "normalize": false, "positive": false, "tol": 0.021403233140986057}, {"alpha": 12.960656597279737, "fit_intercept": true, "max_iter": 4378, "normalize": true, "positive": false, "tol": 0.013246974647468445}, {"alpha": 0.029723346443356558, "fit_intercept": true, "max_iter": 24, "normalize": true, "positive": true, "tol": 0.00045566719139214756}], [22.470424339960193, 22.480410501619424, 22.470424339960193, 22.470424339960193, 22.482785477024642]]},
"data": {"coords": {"iter": {"dims": ["iter"], "attrs": {}, "data": [0, 1, 2, 3, 4, 5, 6, 7, 8, 9, 10, 11, 12, 13, 14, 15, 16, 17, 18, 19]}, "suggestion": {"dims": ["suggestion"], "attrs": {}, "data": [0]}}, "attrs": {}, "dims": {"iter": 20, "suggestion": 1}, "data_vars": {"alpha": {"dims": ["iter", "suggestion"], "attrs": {}, "data": [[1.9806288967598327], [25.34641019756872], [0.040994082711651836], [0.029400426543113107], [0.06592208692939786], [0.027481268236326715], [0.04684934864712972], [0.04132186734004119], [0.15745042160488681], [0.4539665126153927], [3.9508793869427357], [81.80161675021735], [0.020231164613463824], [0.040198540926459005], [0.012347246051978587], [0.020625009313264067], [0.012389741849569069], [0.0181457991115276], [0.020397698139693218], [0.03885314773841194]]}, "fit_intercept": {"dims": ["iter", "suggestion"], "attrs": {}, "data": [[0], [0], [0], [0], [0], [0], [1], [1], [1], [1], [1], [1], [1], [1], [1], [1], [1], [1], [0], [1]]}, "max_iter": {"dims": ["iter", "suggestion"], "attrs": {}, "data": [[2745], [4207], [3244], [2587], [2747], [1287], [2861], [3231], [4197], [4156], [3214], [772], [2189], [2457], [1867], [2201], [2211], [2299], [2364], [2248]]}, "normalize": {"dims": ["iter", "suggestion"], "attrs": {}, "data": [[0], [0], [0], [1], [0], [1], [1], [1], [1], [1], [1], [0], [0], [0], [0], [0], [0], [0], [0], [1]]}, "positive": {"dims": ["iter", "suggestion"], "attrs": {}, "data": [[0], [1], [1], [1], [0], [1], [0], [0], [0], [0], [0], [0], [0], [0], [0], [1], [1], [0], [1], [1]]}, "tol": {"dims": ["iter", "suggestion"], "attrs": {}, "data": [[2.6535740221616806e-05], [2.6086409838307816e-05], [0.0037631960805144067], [0.008550745839576115], [0.0016029916485772518], [0.008461574744447148], [0.005346063543416295], [0.007841765357353299], [0.06704711219080774], [0.0021189216713635864], [0.000126732864019625], [0.0022647889601201325], [0.007680707308552192], [4.556351564467039e-05], [1.4477855576307296e-05], [0.0006417624106200158], [0.0001901375508750089], [9.458024369333562e-05], [1.743247235803305e-05], [3.366105629485147e-05]]}}}}
