# Supplementary material
Source: ML conference proceedings conference paper supplement (https://proceedings.neurips.cc/paper_files/paper/2022/hash/31a57804448363bcab777f818f75f5b4-Abstract.html)
Supplement: Supplementary file 1 [file 31a57804448363bcab777f818f75f5b4-Supplemental-Conference.zip › trading_off_resource_budgets_f-Supplementary Material/code_and_data/experiments/base_results/bo_20220228_124924_b7rkpeqg/suggest_log/0e7a034350be5eb0bdcebd2c144dd1d1.json]

{"meta": {"args": {"--uuid": "0e7a034350be5eb0bdcebd2c144dd1d1", "-db-root": "/home/damon_falck/blackboxbandits/experiments/saved_results", "--opt-root": "/home/damon_falck/blackboxbandits/experiments", "--data-root": "/home/damon_falck/blackboxbandits/experiments/penn_datasets", "--db": "bo_20220228_124924_b7rkpeqg", "--opt": "Scikit-GP-LCB", "--data": "clf-monk1", "--classifier": "MLP-adam", "--metric": "nll", "--calls": 20, "--suggestions": 1, "--jobs-file": null, "--verbose": false, "dry_run": false, "rev": "bd14afd", "opt_rev": "0.9.0"}, "signature": [[{"alpha": 0.019628224813442792, "batch_size": 182, "beta_1": 0.9410202200271762, "beta_2": 0.9998021557676793, "epsilon": 1.8662266976518e-08, "hidden_layer_sizes": 147, "learning_rate_init": 0.0005627932047415167, "tol": 0.03690557729213761, "validation_fraction": 0.8846827852548593}, {"alpha": 0.001998246739232944, "batch_size": 200, "beta_1": 0.919111482530466, "beta_2": 0.9998488260436156, "epsilon": 5.981221901152555e-07, "hidden_layer_sizes": 61, "learning_rate_init": 2.2310905607443014e-05, "tol": 1.2046852412030316e-05, "validation_fraction": 0.8117896445826539}, {"alpha": 0.46659545670218433, "batch_size": 219, "beta_1": 0.9889789783750891, "beta_2": 0.9999896868093284, "epsilon": 2.4234724484675948e-08, "hidden_layer_sizes": 167, "learning_rate_init": 2.972334644335654e-05, "tol": 0.0036281404040243792, "validation_fraction": 0.17260651658522078}, {"alpha": 4.656005689076002, "batch_size": 135, "beta_1": 0.870503881627747, "beta_2": 0.9948873266941017, "epsilon": 2.1023308743480125e-07, "hidden_layer_sizes": 118, "learning_rate_init": 0.001878173875716191, "tol": 1.1889379831773006e-05, "validation_fraction": 0.6264327093752792}, {"alpha": 0.04705159350400542, "batch_size": 158, "beta_1": 0.9870884262730957, "beta_2": 0.9999596874382349, "epsilon": 1.1981845126013875e-08, "hidden_layer_sizes": 116, "learning_rate_init": 0.006173405204074311, "tol": 1.7414134181586194e-05, "validation_fraction": 0.6754299026638921}], [0.6655541946779007, 0.7998479670597765, 0.7185920664412209, 0.4477258429798573, 0.14624780705121943]]},
"data": {"coords": {"iter": {"dims": ["iter"], "attrs": {}, "data": [0, 1, 2, 3, 4, 5, 6, 7, 8, 9, 10, 11, 12, 13, 14, 15, 16, 17, 18, 19]}, "suggestion": {"dims": ["suggestion"], "attrs": {}, "data": [0]}}, "attrs": {}, "dims": {"iter": 20, "suggestion": 1}, "data_vars": {"alpha": {"dims": ["iter", "suggestion"], "attrs": {}, "data": [[0.00019921490267643744], [0.5823915313363591], [0.2786360327671823], [0.0015707564054241372], [0.0003211404249469061], [10.0], [1.5448365319120896e-05], [10.0], [0.0006787848947522008], [0.0002029714574508988], [0.0022425477740195803], [1.3954782796125373], [1e-05], [7.379198555018096], [1e-05], [0.00012640133544577185], [1e-05], [1e-05], [1e-05], [1e-05]]}, "batch_size": {"dims": ["iter", "suggestion"], "attrs": {}, "data": [[237], [210], [238], [25], [187], [10], [250], [10], [197], [50], [15], [47], [250], [88], [208], [111], [10], [250], [10], [107]]}, "beta_1": {"dims": ["iter", "suggestion"], "attrs": {}, "data": [[0.853949070238606], [0.6007065108946651], [0.9244704965258629], [0.6448039095149246], [0.6110656598034906], [0.99], [0.5202285916696718], [0.5], [0.5238694174274015], [0.6416257967740252], [0.7867230586556903], [0.5], [0.52747243706738], [0.99], [0.9820302444696473], [0.5198279872890652], [0.99], [0.5], [0.910850691603412], [0.5]]}, "beta_2": {"dims": ["iter", "suggestion"], "attrs": {}, "data": [[0.9748294925766792], [0.9704703306617235], [0.9320226445469973], [0.9354326381908213], [0.9153144597232923], [0.999999], [0.999999], [0.9], [0.9388102363964032], [0.983626474418735], [0.9319654943621959], [0.9807185945805105], [0.9258925103134171], [0.9260602536862662], [0.9129671769574409], [0.9955753165474979], [0.999999], [0.9969960228539448], [0.9182332497668516], [0.9300686591388745]]}, "epsilon": {"dims": ["iter", "suggestion"], "attrs": {}, "data": [[4.577924163444654e-09], [1.9582696014344176e-09], [1.5445294657991003e-09], [3.439239163038228e-09], [9.536980441797499e-08], [1e-09], [1e-06], [1e-06], [1.8679790268226025e-07], [2.801288813754512e-07], [1.4151106904863244e-09], [4.103477848113331e-09], [3.2967771112165184e-09], [3.9147144147532343e-07], [2.409720123117704e-08], [4.217908026457154e-07], [1e-09], [5.29135432434731e-07], [1e-09], [3.670691281489146e-07]]}, "hidden_layer_sizes": {"dims": ["iter", "suggestion"], "attrs": {}, "data": [[72], [133], [86], [60], [106], [200], [190], [50], [158], [147], [149], [107], [50], [198], [102], [200], [50], [50], [192], [107]]}, "learning_rate_init": {"dims": ["iter", "suggestion"], "attrs": {}, "data": [[0.03221006853359804], [0.003683828554282867], [5.825577067093932e-05], [0.0001339347545231319], [0.07571561708446628], [0.1], [0.007847725354280206], [0.1], [0.007806057174024893], [0.1], [0.00043992856608769367], [0.01967377934693611], [0.0033717759115400093], [0.1], [0.012287854304965208], [0.0016897823214942734], [0.1], [1e-05], [0.1], [0.0018468996522991497]]}, "tol": {"dims": ["iter", "suggestion"], "attrs": {}, "data": [[0.0007425020659191528], [0.0078652857435783], [0.005614741050961578], [0.021566691183983897], [0.00019032179532995922], [0.1], [1e-05], [1e-05], [0.00029149724011798007], [0.002007500984053662], [0.000326265394038898], [0.00011760314619797908], [0.001178803826956193], [0.00036926767164536443], [0.00030931549977597484], [0.0011607830235938743], [0.1], [1e-05], [1e-05], [0.1]]}, "validation_fraction": {"dims": ["iter", "suggestion"], "attrs": {}, "data": [[0.2706913050895721], [0.4402955616349007], [0.6237242529028675], [0.6271118126944626], [0.6294441800104738], [0.1], [0.9], [0.9], [0.46609277423808004], [0.8336587731411365], [0.12602919878990834], [0.17382420397445578], [0.1], [0.1568802722548931], [0.6177454255044781], [0.2926144080464814], [0.4430080073845296], [0.1861272578372634], [0.3970018805067005], [0.1881429844901328]]}}}}
