# Supplementary material
Source: ML conference proceedings conference paper supplement (https://proceedings.neurips.cc/paper_files/paper/2022/hash/31a57804448363bcab777f818f75f5b4-Abstract.html)
Supplement: Supplementary file 1 [file 31a57804448363bcab777f818f75f5b4-Supplemental-Conference.zip › trading_off_resource_budgets_f-Supplementary Material/code_and_data/experiments/base_results/bo_20220228_124924_b7rkpeqg/suggest_log/0e318a26d21e59b9bbc6a8fedcb861da.json]

{"meta": {"args": {"--uuid": "0e318a26d21e59b9bbc6a8fedcb861da", "-db-root": "/home/damon_falck/blackboxbandits/experiments/saved_results", "--opt-root": "/home/damon_falck/blackboxbandits/experiments", "--data-root": "/home/damon_falck/blackboxbandits/experiments/penn_datasets", "--db": "bo_20220228_124924_b7rkpeqg", "--opt": "Scikit-GBRT-Hedge", "--data": "clf-cleveland", "--classifier": "MLP-adam", "--metric": "nll", "--calls": 20, "--suggestions": 1, "--jobs-file": null, "--verbose": false, "dry_run": false, "rev": "bd14afd", "opt_rev": "0.9.0"}, "signature": [[{"alpha": 0.019628224813442792, "batch_size": 182, "beta_1": 0.9410202200271762, "beta_2": 0.9998021557676793, "epsilon": 1.8662266976518e-08, "hidden_layer_sizes": 147, "learning_rate_init": 0.0005627932047415167, "tol": 0.03690557729213761, "validation_fraction": 0.8846827852548593}, {"alpha": 0.001998246739232944, "batch_size": 200, "beta_1": 0.919111482530466, "beta_2": 0.9998488260436156, "epsilon": 5.981221901152555e-07, "hidden_layer_sizes": 61, "learning_rate_init": 2.2310905607443014e-05, "tol": 1.2046852412030316e-05, "validation_fraction": 0.8117896445826539}, {"alpha": 0.46659545670218433, "batch_size": 219, "beta_1": 0.9889789783750891, "beta_2": 0.9999896868093284, "epsilon": 2.4234724484675948e-08, "hidden_layer_sizes": 167, "learning_rate_init": 2.972334644335654e-05, "tol": 0.0036281404040243792, "validation_fraction": 0.17260651658522078}, {"alpha": 4.656005689076002, "batch_size": 135, "beta_1": 0.870503881627747, "beta_2": 0.9948873266941017, "epsilon": 2.1023308743480125e-07, "hidden_layer_sizes": 118, "learning_rate_init": 0.001878173875716191, "tol": 1.1889379831773006e-05, "validation_fraction": 0.6264327093752792}, {"alpha": 0.04705159350400542, "batch_size": 158, "beta_1": 0.9870884262730957, "beta_2": 0.9999596874382349, "epsilon": 1.1981845126013875e-08, "hidden_layer_sizes": 116, "learning_rate_init": 0.006173405204074311, "tol": 1.7414134181586194e-05, "validation_fraction": 0.6754299026638921}], [1.5784919806982995, 1.9523322455138672, 1.7579361668039755, 1.2239972747495727, 1.311105953355304]]},
"data": {"coords": {"iter": {"dims": ["iter"], "attrs": {}, "data": [0, 1, 2, 3, 4, 5, 6, 7, 8, 9, 10, 11, 12, 13, 14, 15, 16, 17, 18, 19]}, "suggestion": {"dims": ["suggestion"], "attrs": {}, "data": [0]}}, "attrs": {}, "dims": {"iter": 20, "suggestion": 1}, "data_vars": {"alpha": {"dims": ["iter", "suggestion"], "attrs": {}, "data": [[0.0011676387617446454], [0.5313377833657509], [9.898408839139309], [3.996138252683318e-05], [0.0012865642738819727], [2.9361145139670457], [1.8759485814959909], [4.950514833682935], [3.3884017682034906], [9.036727087010684], [0.032129095027159146], [9.644967841281916], [0.0005210067128307548], [7.211502368486472e-05], [0.31116228879447105], [9.172878169594513], [0.018856572378564796], [0.00017439972802082713], [3.4580387830058426], [0.2678399398347142]]}, "batch_size": {"dims": ["iter", "suggestion"], "attrs": {}, "data": [[191], [167], [62], [142], [23], [238], [249], [123], [157], [228], [222], [209], [44], [231], [186], [51], [235], [37], [64], [230]]}, "beta_1": {"dims": ["iter", "suggestion"], "attrs": {}, "data": [[0.6851505779327006], [0.5010025338608308], [0.977501654349604], [0.8058370628758473], [0.6885051380717918], [0.9267477196716213], [0.9143483756777994], [0.9069382544183027], [0.6169104723365764], [0.9634787433307131], [0.9585109959154597], [0.9663826759508708], [0.860721065428411], [0.9339865223526335], [0.8840801869185981], [0.9548347866046853], [0.9294467849686565], [0.9680230795248808], [0.8972407738847822], [0.9397151899213751]]}, "beta_2": {"dims": ["iter", "suggestion"], "attrs": {}, "data": [[0.9026554495980846], [0.9180846788933126], [0.952564129841567], [0.9290704450116655], [0.9318249145220289], [0.992839066143194], [0.9433389409670335], [0.9839625393808964], [0.9978084602242141], [0.9720761897627094], [0.9967909208418213], [0.9817550889146155], [0.9990226818506037], [0.9999652881302278], [0.9051261132869733], [0.9828131117284399], [0.9837458522094787], [0.915533835931685], [0.9974789876520227], [0.9469526934721207]]}, "epsilon": {"dims": ["iter", "suggestion"], "attrs": {}, "data": [[1.8611642703951185e-09], [9.491161836936572e-08], [3.781736906677775e-07], [2.3938183815970236e-07], [3.961708264782349e-07], [4.435873908093317e-09], [7.973307314370125e-08], [2.6458496344384313e-08], [2.2997497889363304e-07], [4.760147655274973e-09], [7.193203705699827e-09], [1.3059695739714721e-09], [8.1067996543417e-08], [9.173347676138873e-07], [1.433948501001548e-09], [1.0263407289484565e-09], [4.523740155165876e-09], [1.3880177320285314e-08], [2.0572541608685885e-09], [1.5732520975259549e-09]]}, "hidden_layer_sizes": {"dims": ["iter", "suggestion"], "attrs": {}, "data": [[135], [149], [135], [72], [70], [100], [161], [91], [148], [60], [52], [62], [100], [140], [140], [188], [129], [148], [101], [72]]}, "learning_rate_init": {"dims": ["iter", "suggestion"], "attrs": {}, "data": [[0.0005971837931764068], [1.1164395663331868e-05], [0.0009969757015026682], [0.06452821330737124], [3.1252153515744386e-05], [0.004528516210003609], [0.028796617040104146], [0.001324820880194865], [5.8429762453253805e-05], [0.05254453965806477], [0.03910268157882775], [0.0048130218969794], [0.05859461112173502], [0.004879509649708599], [0.003128391004882128], [0.0018810631082744552], [0.011025456878591695], [0.05840938152503079], [0.001399673722130446], [0.006558968966262755]]}, "tol": {"dims": ["iter", "suggestion"], "attrs": {}, "data": [[0.044128533811993796], [0.025975312394816735], [0.0005758236445935507], [0.004797309999569097], [0.0007512939944323504], [0.00015961370351725627], [0.0001212656136064235], [7.748635091285206e-05], [8.059971208440443e-05], [0.0008927668203309886], [0.0036843421654822626], [0.0001780584685511718], [1.1395383879165072e-05], [0.03271464867103427], [1.6155406928095024e-05], [1.1232740685784882e-05], [0.002204531012902775], [0.014742450477655804], [0.0014303970105370594], [0.001866471249481016]]}, "validation_fraction": {"dims": ["iter", "suggestion"], "attrs": {}, "data": [[0.5490108911171898], [0.41394448531561234], [0.8785384041492037], [0.17564176490186864], [0.11856730193670541], [0.7719842498848724], [0.7763780641178956], [0.6785748871987035], [0.6232932837018287], [0.8272586358276575], [0.6660881865599], [0.743075738556953], [0.7139165384207701], [0.31739677244800624], [0.3656900911348874], [0.2988848316589082], [0.35553567577394896], [0.11049521545966257], [0.45035049564588187], [0.17504153154390262]]}}}}
