# Supplementary material
Source: ML conference proceedings conference paper supplement (https://proceedings.neurips.cc/paper_files/paper/2022/hash/31a57804448363bcab777f818f75f5b4-Abstract.html)
Supplement: Supplementary file 1 [file 31a57804448363bcab777f818f75f5b4-Supplemental-Conference.zip › trading_off_resource_budgets_f-Supplementary Material/code_and_data/experiments/base_results/bo_20220228_124924_b7rkpeqg/suggest_log/000e563a316d56ad8d0c4b56b2813fe9.json]

{"meta": {"args": {"--uuid": "000e563a316d56ad8d0c4b56b2813fe9", "-db-root": "/home/damon_falck/blackboxbandits/experiments/saved_results", "--opt-root": "/home/damon_falck/blackboxbandits/experiments", "--data-root": "/home/damon_falck/blackboxbandits/experiments/penn_datasets", "--db": "bo_20220228_124924_b7rkpeqg", "--opt": "HyperOpt", "--data": "clf-analcatdata-boxing1", "--classifier": "lasso", "--metric": "nll", "--calls": 20, "--suggestions": 1, "--jobs-file": null, "--verbose": false, "dry_run": false, "rev": "bd14afd", "opt_rev": "0.2.7"}, "signature": [[{"C": 1.5676677195506077, "intercept_scaling": 7.257005721594282}, {"C": 2.57663857461359, "intercept_scaling": 1.5119336467641016}, {"C": 0.49501595537331966, "intercept_scaling": 3.833332156156665}, {"C": 0.5627932047415171, "intercept_scaling": 36.905577292137636}, {"C": 71.55682161754872, "intercept_scaling": 0.34179529120610125}], [0.4408436602197835, 0.4889532460620741, 0.40856771140440945, 0.40749462943606873, 0.9744296809287365]]},
"data": {"coords": {"iter": {"dims": ["iter"], "attrs": {}, "data": [0, 1, 2, 3, 4, 5, 6, 7, 8, 9, 10, 11, 12, 13, 14, 15, 16, 17, 18, 19]}, "suggestion": {"dims": ["suggestion"], "attrs": {}, "data": [0]}}, "attrs": {}, "dims": {"iter": 20, "suggestion": 1}, "data_vars": {"C": {"dims": ["iter", "suggestion"], "attrs": {}, "data": [[7.268498729233775], [0.10006186839693483], [0.44743157744399414], [0.0836806037521205], [0.5576357678298508], [3.564817482520739], [37.32507610454351], [1.317795867684934], [0.17612869410656493], [94.92120938918518], [1.6174417317219307], [1.3847418332020065], [0.051131368008645636], [0.07551522144341384], [0.03097856530261004], [0.03600641302957049], [0.024847044111756988], [0.043989120799748524], [1.9429704393056775], [0.1003526842994864]]}, "intercept_scaling": {"dims": ["iter", "suggestion"], "attrs": {}, "data": [[0.025891093442997226], [0.03222832386454985], [0.05762296150198368], [0.055064582996781616], [3.1756628414212096], [0.11438113096551633], [0.7014691034864581], [12.240863416388805], [20.407653662582096], [0.010712958236529147], [0.23787402736780633], [1.1700194765135403], [0.11931722031602882], [6.103587070395723], [1.6447184303486821], [0.05964404846734557], [0.01664513321691546], [49.637586111942454], [1.2415726996114982], [0.03982150492077024]]}}}}
