# Supplementary material
Source: ML conference proceedings conference paper supplement (https://proceedings.neurips.cc/paper_files/paper/2022/hash/31a57804448363bcab777f818f75f5b4-Abstract.html)
Supplement: Supplementary file 1 [file 31a57804448363bcab777f818f75f5b4-Supplemental-Conference.zip › trading_off_resource_budgets_f-Supplementary Material/code_and_data/experiments/base_results/bo_20220228_124924_b7rkpeqg/suggest_log/0e16548b54b95ba089fdb82570791bba.json]

{"meta": {"args": {"--uuid": "0e16548b54b95ba089fdb82570791bba", "-db-root": "/home/damon_falck/blackboxbandits/experiments/saved_results", "--opt-root": "/home/damon_falck/blackboxbandits/experiments", "--data-root": "/home/damon_falck/blackboxbandits/experiments/penn_datasets", "--db": "bo_20220228_124924_b7rkpeqg", "--opt": "OpenTuner-BanditA", "--data": "clf-irish", "--classifier": "MLP-adam", "--metric": "nll", "--calls": 20, "--suggestions": 1, "--jobs-file": null, "--verbose": false, "dry_run": false, "rev": "bd14afd", "opt_rev": "0.8.7"}, "signature": [[{"alpha": 0.019628224813442792, "batch_size": 182, "beta_1": 0.9410202200271762, "beta_2": 0.9998021557676793, "epsilon": 1.8662266976518e-08, "hidden_layer_sizes": 147, "learning_rate_init": 0.0005627932047415167, "tol": 0.03690557729213761, "validation_fraction": 0.8846827852548593}, {"alpha": 0.001998246739232944, "batch_size": 200, "beta_1": 0.919111482530466, "beta_2": 0.9998488260436156, "epsilon": 5.981221901152555e-07, "hidden_layer_sizes": 61, "learning_rate_init": 2.2310905607443014e-05, "tol": 1.2046852412030316e-05, "validation_fraction": 0.8117896445826539}, {"alpha": 0.46659545670218433, "batch_size": 219, "beta_1": 0.9889789783750891, "beta_2": 0.9999896868093284, "epsilon": 2.4234724484675948e-08, "hidden_layer_sizes": 167, "learning_rate_init": 2.972334644335654e-05, "tol": 0.0036281404040243792, "validation_fraction": 0.17260651658522078}, {"alpha": 4.656005689076002, "batch_size": 135, "beta_1": 0.870503881627747, "beta_2": 0.9948873266941017, "epsilon": 2.1023308743480125e-07, "hidden_layer_sizes": 118, "learning_rate_init": 0.001878173875716191, "tol": 1.1889379831773006e-05, "validation_fraction": 0.6264327093752792}, {"alpha": 0.04705159350400542, "batch_size": 158, "beta_1": 0.9870884262730957, "beta_2": 0.9999596874382349, "epsilon": 1.1981845126013875e-08, "hidden_layer_sizes": 116, "learning_rate_init": 0.006173405204074311, "tol": 1.7414134181586194e-05, "validation_fraction": 0.6754299026638921}], [0.5396870258202617, 0.8425100195529426, 0.6677687722717902, 0.22540136136469896, 0.08144089018105716]]},
"data": {"coords": {"iter": {"dims": ["iter"], "attrs": {}, "data": [0, 1, 2, 3, 4, 5, 6, 7, 8, 9, 10, 11, 12, 13, 14, 15, 16, 17, 18, 19]}, "suggestion": {"dims": ["suggestion"], "attrs": {}, "data": [0]}}, "attrs": {}, "dims": {"iter": 20, "suggestion": 1}, "data_vars": {"alpha": {"dims": ["iter", "suggestion"], "attrs": {}, "data": [[0.3580928500343094], [0.4812071576664891], [1.067626621474583], [1.067626621474583], [1.2051938191289593], [2.3943384600406965], [5.556057609406878], [4.98358225205842], [0.271389970404507], [8.157983546545436], [0.5253477906476766], [0.11044348111965967], [0.15812027355192754], [1.067626621474583], [0.21968182599428293], [0.42746269280178456], [2.42549942620402], [2.720195311461198], [1.067626621474583], [1.067626621474583]]}, "batch_size": {"dims": ["iter", "suggestion"], "attrs": {}, "data": [[219], [219], [124], [124], [195], [218], [239], [24], [175], [234], [115], [180], [124], [124], [107], [150], [176], [230], [142], [124]]}, "beta_1": {"dims": ["iter", "suggestion"], "attrs": {}, "data": [[0.7067808567644431], [0.7067808567644431], [0.8993529892469501], [0.8993529892469501], [0.7832579173618799], [0.660798562309113], [0.9259440854142633], [0.5819388313191425], [0.8354466452457863], [0.8363927813062397], [0.8520239966622354], [0.8058198331867866], [0.8993529892469501], [0.9577210714718474], [0.5504690649650825], [0.6757352653422061], [0.9268193970627928], [0.6189861200841508], [0.8993529892469501], [0.8993529892469501]]}, "beta_2": {"dims": ["iter", "suggestion"], "attrs": {}, "data": [[0.9153803959148917], [0.9153803959148917], [0.932268299197096], [0.932268299197096], [0.9328157759251343], [0.9939169913382776], [0.9748205410025184], [0.9466370391379975], [0.90562655934722], [0.9160514539464828], [0.9545153687360527], [0.9030417469368632], [0.932268299197096], [0.9350747759400979], [0.9000982477160319], [0.911031707199474], [0.967053981775576], [0.9914984935309774], [0.9318522796332973], [0.932268299197096]]}, "epsilon": {"dims": ["iter", "suggestion"], "attrs": {}, "data": [[5.99414529706659e-07], [5.99414529706659e-07], [6.472433225543261e-08], [6.472433225543261e-08], [1.352096875855958e-07], [9.80653894228605e-07], [6.348758506974073e-07], [3.5245173038486635e-07], [3.410574992706851e-07], [7.059852452922778e-07], [9.430626243539232e-07], [5.589796913401935e-07], [6.472433225543261e-08], [6.472433225543261e-08], [6.561605635785051e-07], [1.2043226119193184e-07], [9.38988354765551e-07], [7.336647311067802e-07], [6.472433225543261e-08], [6.472433225543261e-08]]}, "hidden_layer_sizes": {"dims": ["iter", "suggestion"], "attrs": {}, "data": [[86], [86], [188], [186], [59], [151], [56], [78], [81], [109], [101], [196], [188], [188], [191], [96], [118], [149], [188], [188]]}, "learning_rate_init": {"dims": ["iter", "suggestion"], "attrs": {}, "data": [[0.049497239927085594], [0.058067942876835525], [0.05364383591729143], [0.05364383591729143], [0.0005382596852853594], [0.06475771761059017], [0.07331765024160812], [0.02455990929399603], [0.003966382361198773], [0.01851602954652558], [0.05672609444415116], [0.03287028557956722], [0.05364383591729143], [0.05364383591729143], [0.07723085182084814], [0.05840557023230313], [5.176727154936444e-05], [0.024302427735790767], [0.05364383591729143], [0.05364383591729143]]}, "tol": {"dims": ["iter", "suggestion"], "attrs": {}, "data": [[0.0955120958765358], [0.0955120958765358], [0.01002562480648821], [0.01002562480648821], [0.0344291377895724], [0.04811781635577355], [0.06397864003570734], [0.08267277447905068], [0.044882531753019865], [0.0868477829956175], [0.005976107980852397], [0.008668314115628451], [0.01002562480648821], [0.0006312616730150167], [0.08493067997255592], [0.06742328880161723], [0.037534168388763715], [0.05040507023358847], [0.021682877821474312], [0.01002562480648821]]}, "validation_fraction": {"dims": ["iter", "suggestion"], "attrs": {}, "data": [[0.38224726605852244], [0.38224726605852244], [0.3684518968363689], [0.3684518968363689], [0.15526942918528494], [0.8821339061114976], [0.8290460687608744], [0.16767478909412697], [0.3801404920236824], [0.5124109398172577], [0.6554906755774743], [0.28070293483335673], [0.3684518968363689], [0.3849433136267205], [0.6798720469807542], [0.5865616620454026], [0.688865269755934], [0.8869879856777946], [0.3684518968363689], [0.20552187068976738]]}}}}
