# Supplementary material
Source: ML conference proceedings conference paper supplement (https://proceedings.neurips.cc/paper_files/paper/2022/hash/31a57804448363bcab777f818f75f5b4-Abstract.html)
Supplement: Supplementary file 1 [file 31a57804448363bcab777f818f75f5b4-Supplemental-Conference.zip › trading_off_resource_budgets_f-Supplementary Material/code_and_data/experiments/base_results/bo_20220228_124924_b7rkpeqg/suggest_log/0e0801503176523f99134c4a42dc93dc.json]

{"meta": {"args": {"--uuid": "0e0801503176523f99134c4a42dc93dc", "-db-root": "/home/damon_falck/blackboxbandits/experiments/saved_results", "--opt-root": "/home/damon_falck/blackboxbandits/experiments", "--data-root": "/home/damon_falck/blackboxbandits/experiments/penn_datasets", "--db": "bo_20220228_124924_b7rkpeqg", "--opt": "HyperOpt", "--data": "clf-sonar", "--classifier": "MLP-adam", "--metric": "nll", "--calls": 20, "--suggestions": 1, "--jobs-file": null, "--verbose": false, "dry_run": false, "rev": "bd14afd", "opt_rev": "0.2.7"}, "signature": [[{"alpha": 0.019628224813442792, "batch_size": 182, "beta_1": 0.9410202200271762, "beta_2": 0.9998021557676793, "epsilon": 1.8662266976518e-08, "hidden_layer_sizes": 147, "learning_rate_init": 0.0005627932047415167, "tol": 0.03690557729213761, "validation_fraction": 0.8846827852548593}, {"alpha": 0.001998246739232944, "batch_size": 200, "beta_1": 0.919111482530466, "beta_2": 0.9998488260436156, "epsilon": 5.981221901152555e-07, "hidden_layer_sizes": 61, "learning_rate_init": 2.2310905607443014e-05, "tol": 1.2046852412030316e-05, "validation_fraction": 0.8117896445826539}, {"alpha": 0.46659545670218433, "batch_size": 219, "beta_1": 0.9889789783750891, "beta_2": 0.9999896868093284, "epsilon": 2.4234724484675948e-08, "hidden_layer_sizes": 167, "learning_rate_init": 2.972334644335654e-05, "tol": 0.0036281404040243792, "validation_fraction": 0.17260651658522078}, {"alpha": 4.656005689076002, "batch_size": 135, "beta_1": 0.870503881627747, "beta_2": 0.9948873266941017, "epsilon": 2.1023308743480125e-07, "hidden_layer_sizes": 118, "learning_rate_init": 0.001878173875716191, "tol": 1.1889379831773006e-05, "validation_fraction": 0.6264327093752792}, {"alpha": 0.04705159350400542, "batch_size": 158, "beta_1": 0.9870884262730957, "beta_2": 0.9999596874382349, "epsilon": 1.1981845126013875e-08, "hidden_layer_sizes": 116, "learning_rate_init": 0.006173405204074311, "tol": 1.7414134181586194e-05, "validation_fraction": 0.6754299026638921}], [0.7498222823720752, 0.7682907232766848, 0.6906087790099306, 0.5285953001051236, 0.6512245243925411]]},
"data": {"coords": {"iter": {"dims": ["iter"], "attrs": {}, "data": [0, 1, 2, 3, 4, 5, 6, 7, 8, 9, 10, 11, 12, 13, 14, 15, 16, 17, 18, 19]}, "suggestion": {"dims": ["suggestion"], "attrs": {}, "data": [0]}}, "attrs": {}, "dims": {"iter": 20, "suggestion": 1}, "data_vars": {"alpha": {"dims": ["iter", "suggestion"], "attrs": {}, "data": [[0.002401307232833236], [1.2748642453767595e-05], [0.0006105052635295269], [0.02154466853388652], [7.750187059551462], [0.00019167226436314513], [0.00012985445962478349], [7.851436474796308e-05], [2.883398422449587e-05], [0.02500034248163648], [1.1400103795430429e-05], [5.2175569142598814e-05], [0.00683263166117528], [0.004384849903262305], [0.005564348180583375], [0.002125718900553136], [0.0009369065653497485], [0.6260843301216978], [0.00022861543156435334], [0.003364435335278954]]}, "batch_size": {"dims": ["iter", "suggestion"], "attrs": {}, "data": [[148], [67], [231], [234], [247], [108], [57], [198], [31], [14], [120], [170], [145], [242], [68], [193], [161], [41], [72], [162]]}, "beta_1": {"dims": ["iter", "suggestion"], "attrs": {}, "data": [[0.5581827509152869], [0.7201803463557447], [0.6740442898010619], [0.6519276010815627], [0.8732120231258241], [0.8117168282486736], [0.8180437639594199], [0.6299754630971117], [0.6076630744427665], [0.8205957473400627], [0.8863467706648694], [0.5074268584959964], [0.6210016155535667], [0.7291670799830625], [0.6664457826887771], [0.7251344167605399], [0.6853373045455051], [0.8504845041258745], [0.7419881040594077], [0.8094969044052772]]}, "beta_2": {"dims": ["iter", "suggestion"], "attrs": {}, "data": [[0.9073365274910403], [0.9318979245389847], [0.9896199717334131], [0.9719329276721519], [0.9053104255837194], [0.9889545546124695], [0.9152528361224259], [0.9887515999023443], [0.9152070487844864], [0.9388364478806416], [0.9767093884068548], [0.9008763377835441], [0.9953318838280093], [0.9610924344605176], [0.9305531289551773], [0.9239365240178636], [0.9157351926326992], [0.9594066083710423], [0.9283178877210412], [0.9125475544221573]]}, "epsilon": {"dims": ["iter", "suggestion"], "attrs": {}, "data": [[4.04589946381634e-07], [3.0251334277209425e-09], [8.072644416672836e-09], [9.911055667215123e-09], [2.3873202174193753e-09], [4.20826753248453e-07], [1.5950019598749548e-08], [1.181404326234339e-09], [2.955325829612004e-09], [7.167382323363477e-08], [5.830337426695309e-08], [7.987668944166353e-07], [2.968514384343361e-07], [2.1668783071713015e-07], [1.095539496563221e-08], [2.5608357578602457e-08], [2.379220139792906e-08], [6.525341646418337e-09], [1.887394137483921e-08], [3.005192246405488e-09]]}, "hidden_layer_sizes": {"dims": ["iter", "suggestion"], "attrs": {}, "data": [[121], [76], [178], [169], [189], [179], [143], [78], [192], [135], [157], [72], [181], [173], [60], [110], [78], [148], [142], [131]]}, "learning_rate_init": {"dims": ["iter", "suggestion"], "attrs": {}, "data": [[0.07301068045904477], [0.0005661719178401048], [0.0037224118309501834], [0.01129334374323784], [1.812453029491047e-05], [2.725408359172864e-05], [5.977369131203407e-05], [0.053998868032016166], [0.0001423918349039605], [4.9805944908033134e-05], [5.4332092800308807e-05], [0.05407472862629478], [0.02418052959515369], [0.004767755659162773], [0.0007212486847233105], [0.00012099993247578762], [0.0060968159252735125], [2.188371330711195e-05], [4.649162453043538e-05], [0.002000328022870317]]}, "tol": {"dims": ["iter", "suggestion"], "attrs": {}, "data": [[0.001375995464943744], [6.896213779254767e-05], [4.359512889571867e-05], [4.550588338958331e-05], [0.0002968476578256308], [2.4552595453149127e-05], [0.005641487737056472], [0.001020992621602874], [0.07919636229833855], [5.144971054323575e-05], [0.009583651975570416], [0.00027636845178414637], [0.0001647039955834722], [0.0007024289610746907], [0.040722147853897474], [0.040726396661623726], [0.0012768702835382589], [0.0001765132702227901], [0.00011984049299116053], [7.091089635016066e-05]]}, "validation_fraction": {"dims": ["iter", "suggestion"], "attrs": {}, "data": [[0.5893970201961374], [0.3978075263164855], [0.8477195716690928], [0.2645800771800337], [0.10291285185854596], [0.11635253841360234], [0.17429481959157123], [0.5398464904286874], [0.1703661896451113], [0.6039759352836093], [0.11076726641253339], [0.1999539689939812], [0.14228813513510416], [0.17670372051555414], [0.18263387487870522], [0.11178045870962745], [0.8554563426607712], [0.7276990577629562], [0.5154751823175687], [0.23591800890961984]]}}}}
