# Supplementary material
Source: ML conference proceedings conference paper supplement (https://proceedings.neurips.cc/paper_files/paper/2022/hash/31a57804448363bcab777f818f75f5b4-Abstract.html)
Supplement: Supplementary file 1 [file 31a57804448363bcab777f818f75f5b4-Supplemental-Conference.zip › trading_off_resource_budgets_f-Supplementary Material/code_and_data/experiments/base_results/bo_20220228_124924_b7rkpeqg/suggest_log/00ed9a2e965259da9803901805d5b36a.json]

{"meta": {"args": {"--uuid": "00ed9a2e965259da9803901805d5b36a", "-db-root": "/home/damon_falck/blackboxbandits/experiments/saved_results", "--opt-root": "/home/damon_falck/blackboxbandits/experiments", "--data-root": "/home/damon_falck/blackboxbandits/experiments/penn_datasets", "--db": "bo_20220228_124924_b7rkpeqg", "--opt": "HyperOpt", "--data": "reg-527-analcatdata-election2000", "--classifier": "lasso", "--metric": "mse", "--calls": 20, "--suggestions": 1, "--jobs-file": null, "--verbose": false, "dry_run": false, "rev": "bd14afd", "opt_rev": "0.2.7"}, "signature": [[{"alpha": 1.5676677195506077, "fit_intercept": true, "max_iter": 423, "normalize": true, "positive": false, "tol": 0.0038333321561566623}, {"alpha": 0.5627932047415171, "fit_intercept": true, "max_iter": 3989, "normalize": false, "positive": true, "tol": 0.001304907355036239}, {"alpha": 1.871450068624068, "fit_intercept": true, "max_iter": 16, "normalize": false, "positive": false, "tol": 0.021403233140986057}, {"alpha": 12.960656597279737, "fit_intercept": true, "max_iter": 4378, "normalize": true, "positive": false, "tol": 0.013246974647468445}, {"alpha": 0.029723346443356558, "fit_intercept": true, "max_iter": 24, "normalize": true, "positive": true, "tol": 0.00045566719139214756}], [2.6886356698782423, 0.27932362370125563, 2.0940449817843327, 2.6886356698782423, 0.11283562949020225]]},
"data": {"coords": {"iter": {"dims": ["iter"], "attrs": {}, "data": [0, 1, 2, 3, 4, 5, 6, 7, 8, 9, 10, 11, 12, 13, 14, 15, 16, 17, 18, 19]}, "suggestion": {"dims": ["suggestion"], "attrs": {}, "data": [0]}}, "attrs": {}, "dims": {"iter": 20, "suggestion": 1}, "data_vars": {"alpha": {"dims": ["iter", "suggestion"], "attrs": {}, "data": [[0.13020277906742805], [0.20974882426185903], [88.50904976440161], [0.062069481057900576], [30.601590980035827], [5.748378050464501], [0.09147422034292253], [0.4696674919536993], [0.014643814457947863], [0.011807612233828087], [78.9359613036964], [31.987860349846976], [0.09747311064163396], [0.32397389736605764], [1.2804248820735133], [0.223712307720188], [0.05739997601964079], [7.734285201555249], [0.45540717923883134], [80.60502070301695]]}, "fit_intercept": {"dims": ["iter", "suggestion"], "attrs": {}, "data": [[false], [false], [false], [true], [false], [true], [true], [false], [false], [false], [false], [false], [true], [false], [false], [false], [true], [true], [true], [false]]}, "max_iter": {"dims": ["iter", "suggestion"], "attrs": {}, "data": [[38], [4173], [98], [27], [804], [4934], [365], [26], [28], [27], [3862], [41], [187], [4236], [37], [3154], [2485], [176], [498], [30]]}, "normalize": {"dims": ["iter", "suggestion"], "attrs": {}, "data": [[true], [false], [true], [false], [true], [false], [false], [true], [true], [true], [true], [false], [true], [false], [false], [false], [true], [true], [false], [true]]}, "positive": {"dims": ["iter", "suggestion"], "attrs": {}, "data": [[true], [true], [true], [false], [true], [false], [true], [false], [false], [false], [false], [true], [false], [true], [true], [true], [true], [true], [false], [false]]}, "tol": {"dims": ["iter", "suggestion"], "attrs": {}, "data": [[0.0021028016719960253], [0.005438423962555217], [0.0007354224094654044], [1.0529204708554106e-05], [0.04864060840249383], [3.439790262786049e-05], [0.00043485488300618177], [1.7996177829524715e-05], [0.0017637804819555399], [0.00019163204206719466], [0.00010423200821908453], [0.0007204818978815287], [0.0001997458097993644], [0.03378385697570819], [1.0748651314555416e-05], [0.0019014544837915575], [0.0006149265915082428], [7.595906932435439e-05], [0.003607577880546527], [0.00036812142033056116]]}}}}
