# Supplementary material
Source: ML conference proceedings conference paper supplement (https://proceedings.neurips.cc/paper_files/paper/2022/hash/31a57804448363bcab777f818f75f5b4-Abstract.html)
Supplement: Supplementary file 1 [file 31a57804448363bcab777f818f75f5b4-Supplemental-Conference.zip › trading_off_resource_budgets_f-Supplementary Material/code_and_data/experiments/base_results/bo_20220228_124924_b7rkpeqg/suggest_log/00fae2395c8357ef9bac432fa313d522.json]

{"meta": {"args": {"--uuid": "00fae2395c8357ef9bac432fa313d522", "-db-root": "/home/damon_falck/blackboxbandits/experiments/saved_results", "--opt-root": "/home/damon_falck/blackboxbandits/experiments", "--data-root": "/home/damon_falck/blackboxbandits/experiments/penn_datasets", "--db": "bo_20220228_124924_b7rkpeqg", "--opt": "Scikit-GP-Hedge", "--data": "clf-analcatdata-cyyoung8092", "--classifier": "MLP-adam", "--metric": "nll", "--calls": 20, "--suggestions": 1, "--jobs-file": null, "--verbose": false, "dry_run": false, "rev": "bd14afd", "opt_rev": "0.9.0"}, "signature": [[{"alpha": 0.019628224813442792, "batch_size": 182, "beta_1": 0.9410202200271762, "beta_2": 0.9998021557676793, "epsilon": 1.8662266976518e-08, "hidden_layer_sizes": 147, "learning_rate_init": 0.0005627932047415167, "tol": 0.03690557729213761, "validation_fraction": 0.8846827852548593}, {"alpha": 0.001998246739232944, "batch_size": 200, "beta_1": 0.919111482530466, "beta_2": 0.9998488260436156, "epsilon": 5.981221901152555e-07, "hidden_layer_sizes": 61, "learning_rate_init": 2.2310905607443014e-05, "tol": 1.2046852412030316e-05, "validation_fraction": 0.8117896445826539}, {"alpha": 0.46659545670218433, "batch_size": 219, "beta_1": 0.9889789783750891, "beta_2": 0.9999896868093284, "epsilon": 2.4234724484675948e-08, "hidden_layer_sizes": 167, "learning_rate_init": 2.972334644335654e-05, "tol": 0.0036281404040243792, "validation_fraction": 0.17260651658522078}, {"alpha": 4.656005689076002, "batch_size": 135, "beta_1": 0.870503881627747, "beta_2": 0.9948873266941017, "epsilon": 2.1023308743480125e-07, "hidden_layer_sizes": 118, "learning_rate_init": 0.001878173875716191, "tol": 1.1889379831773006e-05, "validation_fraction": 0.6264327093752792}, {"alpha": 0.04705159350400542, "batch_size": 158, "beta_1": 0.9870884262730957, "beta_2": 0.9999596874382349, "epsilon": 1.1981845126013875e-08, "hidden_layer_sizes": 116, "learning_rate_init": 0.006173405204074311, "tol": 1.7414134181586194e-05, "validation_fraction": 0.6754299026638921}], [0.5710217681897332, 0.7066657387840799, 0.650940847531165, 0.5077539347583777, 0.4784405195380613]]},
"data": {"coords": {"iter": {"dims": ["iter"], "attrs": {}, "data": [0, 1, 2, 3, 4, 5, 6, 7, 8, 9, 10, 11, 12, 13, 14, 15, 16, 17, 18, 19]}, "suggestion": {"dims": ["suggestion"], "attrs": {}, "data": [0]}}, "attrs": {}, "dims": {"iter": 20, "suggestion": 1}, "data_vars": {"alpha": {"dims": ["iter", "suggestion"], "attrs": {}, "data": [[9.672151040022907], [0.22485175267761603], [0.0002823584785329022], [2.7564894901838883], [2.1863203408123167e-05], [1e-05], [2.6387163672558676], [0.3404424074002957], [1e-05], [0.0013240090297666391], [1e-05], [10.0], [0.012945214490537172], [1.5108870173898417], [10.0], [10.0], [10.0], [0.0007184150247093999], [0.01622322661588427], [1e-05]]}, "batch_size": {"dims": ["iter", "suggestion"], "attrs": {}, "data": [[177], [196], [123], [233], [195], [250], [243], [250], [250], [250], [10], [10], [10], [10], [10], [10], [250], [37], [59], [231]]}, "beta_1": {"dims": ["iter", "suggestion"], "attrs": {}, "data": [[0.9394539880027558], [0.5310343333927953], [0.5809097563586204], [0.5847627728373633], [0.5111778408016845], [0.5], [0.5055364749312226], [0.5], [0.7977658547600955], [0.99], [0.99], [0.56045595878744], [0.99], [0.99], [0.8418851087150816], [0.99], [0.99], [0.99], [0.9878569801062745], [0.99]]}, "beta_2": {"dims": ["iter", "suggestion"], "attrs": {}, "data": [[0.9921400815713548], [0.9830861745935566], [0.9520493752573097], [0.9714666090285266], [0.9260951693804292], [0.9], [0.9821598317394441], [0.953221514806747], [0.9046490814065017], [0.998739182009198], [0.9491573827673899], [0.9248144119106004], [0.9], [0.9], [0.9163992488320324], [0.9], [0.9127775160180055], [0.933249421991168], [0.9362697635675433], [0.9200284028377018]]}, "epsilon": {"dims": ["iter", "suggestion"], "attrs": {}, "data": [[2.933180184108696e-08], [2.726042467695114e-07], [1.6875202764391574e-08], [1.0147140543172392e-09], [3.337130971631451e-08], [3.6786952762107495e-07], [9.690515347711828e-07], [1.2282559970449544e-09], [1.3783970849736205e-07], [1e-09], [4.517390995031387e-09], [6.581933298333794e-08], [1.318693368970439e-08], [1e-06], [5.451804515113276e-08], [1e-06], [1e-06], [1.4094285932279647e-08], [3.7055822477107175e-09], [6.316837934613964e-07]]}, "hidden_layer_sizes": {"dims": ["iter", "suggestion"], "attrs": {}, "data": [[101], [141], [87], [69], [70], [50], [134], [129], [88], [52], [74], [151], [52], [200], [200], [200], [200], [200], [51], [200]]}, "learning_rate_init": {"dims": ["iter", "suggestion"], "attrs": {}, "data": [[0.0011135101944815915], [0.006742214982670719], [0.00016857749994771332], [0.0010351615190274603], [0.0012248073562571354], [0.1], [1.6594729565361754e-05], [0.0037031516237598524], [0.006178724241404506], [0.0103583288841064], [0.04266578405481331], [0.1], [0.012065497969191648], [0.03389600995512973], [0.022692526982530627], [0.1], [0.03572007883032927], [1e-05], [0.04238142047499608], [0.011135972752294138]]}, "tol": {"dims": ["iter", "suggestion"], "attrs": {}, "data": [[0.0008517349716136809], [0.00030000661644728597], [0.00017851967871762884], [0.00012385213108936428], [0.02139181094551978], [0.0031712043862752544], [0.0001721687792511734], [0.003383084963892429], [0.012457713187153534], [0.0005044617740530956], [0.0036551528646248783], [7.526165423213878e-05], [0.04873863549693615], [0.04160335827627338], [0.00866970159534654], [0.1], [0.003879019016317503], [0.0006526510252992893], [1.0344775347200655e-05], [0.0651722153026695]]}, "validation_fraction": {"dims": ["iter", "suggestion"], "attrs": {}, "data": [[0.15829914095503184], [0.3193261070189224], [0.4945968921863439], [0.13093953476761], [0.5233279821933894], [0.21547266455830327], [0.5056652541543665], [0.1091734918817607], [0.9], [0.1], [0.9], [0.14567885120101262], [0.9], [0.9], [0.9], [0.1], [0.7142696692716721], [0.10810338465030522], [0.3755738151173115], [0.8278201844080497]]}}}}
