# Supplementary material
Source: ML conference proceedings conference paper supplement (https://proceedings.neurips.cc/paper_files/paper/2022/hash/31a57804448363bcab777f818f75f5b4-Abstract.html)
Supplement: Supplementary file 1 [file 31a57804448363bcab777f818f75f5b4-Supplemental-Conference.zip › trading_off_resource_budgets_f-Supplementary Material/code_and_data/experiments/base_results/bo_20220228_124924_b7rkpeqg/suggest_log/00fd1773d7b85aba80a2c571ddb2fe7c.json]

{"meta": {"args": {"--uuid": "00fd1773d7b85aba80a2c571ddb2fe7c", "-db-root": "/home/damon_falck/blackboxbandits/experiments/saved_results", "--opt-root": "/home/damon_falck/blackboxbandits/experiments", "--data-root": "/home/damon_falck/blackboxbandits/experiments/penn_datasets", "--db": "bo_20220228_124924_b7rkpeqg", "--opt": "OpenTuner-GA", "--data": "clf-fars", "--classifier": "MLP-adam", "--metric": "nll", "--calls": 20, "--suggestions": 1, "--jobs-file": null, "--verbose": false, "dry_run": false, "rev": "bd14afd", "opt_rev": "0.8.7"}, "signature": [[{"alpha": 0.019628224813442792, "batch_size": 182, "beta_1": 0.9410202200271762, "beta_2": 0.9998021557676793, "epsilon": 1.8662266976518e-08, "hidden_layer_sizes": 147, "learning_rate_init": 0.0005627932047415167, "tol": 0.03690557729213761, "validation_fraction": 0.8846827852548593}, {"alpha": 0.001998246739232944, "batch_size": 200, "beta_1": 0.919111482530466, "beta_2": 0.9998488260436156, "epsilon": 5.981221901152555e-07, "hidden_layer_sizes": 61, "learning_rate_init": 2.2310905607443014e-05, "tol": 1.2046852412030316e-05, "validation_fraction": 0.8117896445826539}, {"alpha": 0.46659545670218433, "batch_size": 219, "beta_1": 0.9889789783750891, "beta_2": 0.9999896868093284, "epsilon": 2.4234724484675948e-08, "hidden_layer_sizes": 167, "learning_rate_init": 2.972334644335654e-05, "tol": 0.0036281404040243792, "validation_fraction": 0.17260651658522078}, {"alpha": 4.656005689076002, "batch_size": 135, "beta_1": 0.870503881627747, "beta_2": 0.9948873266941017, "epsilon": 2.1023308743480125e-07, "hidden_layer_sizes": 118, "learning_rate_init": 0.001878173875716191, "tol": 1.1889379831773006e-05, "validation_fraction": 0.6264327093752792}, {"alpha": 0.04705159350400542, "batch_size": 158, "beta_1": 0.9870884262730957, "beta_2": 0.9999596874382349, "epsilon": 1.1981845126013875e-08, "hidden_layer_sizes": 116, "learning_rate_init": 0.006173405204074311, "tol": 1.7414134181586194e-05, "validation_fraction": 0.6754299026638921}], [0.49740025641665664, 0.4970838563955472, 0.479624669127633, 0.532722982678443, 0.46389653505119083]]},
"data": {"coords": {"iter": {"dims": ["iter"], "attrs": {}, "data": [0, 1, 2, 3, 4, 5, 6, 7, 8, 9, 10, 11, 12, 13, 14, 15, 16, 17, 18, 19]}, "suggestion": {"dims": ["suggestion"], "attrs": {}, "data": [0]}}, "attrs": {}, "dims": {"iter": 20, "suggestion": 1}, "data_vars": {"alpha": {"dims": ["iter", "suggestion"], "attrs": {}, "data": [[5.93268309999212], [5.93268309999212], [5.93268309999212], [5.93268309999212], [1.633978020595713], [1.3903813719590934], [2.461092552875319], [0.5813167662700706], [1.3903813719590934], [9.716649259208266], [1.3903813719590934], [1.3903813719590934], [1.3903813719590934], [2.4180269483146137], [0.3071414675193426], [1.3903813719590934], [1.3903813719590934], [1.3903813719590934], [1.3903813719590934], [1.3903813719590934]]}, "batch_size": {"dims": ["iter", "suggestion"], "attrs": {}, "data": [[35], [35], [35], [35], [37], [169], [191], [204], [169], [16], [169], [169], [169], [83], [228], [169], [169], [193], [193], [193]]}, "beta_1": {"dims": ["iter", "suggestion"], "attrs": {}, "data": [[0.8695934658396223], [0.8695934658396223], [0.8695934658396223], [0.8695934658396223], [0.9638411766482966], [0.8858923636185381], [0.7553956645194828], [0.5918635442945676], [0.8858923636185381], [0.6855451274939897], [0.8858923636185381], [0.9788959703272779], [0.9788959703272779], [0.7236652504201251], [0.5508856771295646], [0.9788959703272779], [0.9788959703272779], [0.9788959703272779], [0.9788959703272779], [0.9788959703272779]]}, "beta_2": {"dims": ["iter", "suggestion"], "attrs": {}, "data": [[0.9489142300807769], [0.9489142300807769], [0.9489142300807769], [0.9489142300807769], [0.9953826943275693], [0.9276087874435468], [0.9205282480495756], [0.9921974468553715], [0.9276087874435468], [0.9768597652860164], [0.9276087874435468], [0.9276087874435468], [0.9276087874435468], [0.9606454232409588], [0.9134608965381946], [0.9276087874435468], [0.9430592558484813], [0.9430592558484813], [0.973359033357872], [0.9430592558484813]]}, "epsilon": {"dims": ["iter", "suggestion"], "attrs": {}, "data": [[4.711854923183646e-07], [4.711854923183646e-07], [4.711854923183646e-07], [4.711854923183646e-07], [3.9358918027584857e-07], [9.907069088715683e-07], [7.135505600327951e-08], [6.261864492767822e-07], [9.907069088715683e-07], [2.3354216477893373e-08], [9.907069088715683e-07], [9.907069088715683e-07], [5.486824147532255e-07], [7.360076542955719e-07], [2.46232652407168e-07], [9.907069088715683e-07], [9.907069088715683e-07], [9.907069088715683e-07], [9.907069088715683e-07], [9.907069088715683e-07]]}, "hidden_layer_sizes": {"dims": ["iter", "suggestion"], "attrs": {}, "data": [[158], [158], [158], [158], [94], [192], [53], [184], [192], [51], [192], [192], [192], [177], [119], [192], [192], [192], [192], [192]]}, "learning_rate_init": {"dims": ["iter", "suggestion"], "attrs": {}, "data": [[0.006707543710666664], [0.006707543710666664], [0.006707543710666664], [0.006707543710666664], [0.05181582817454993], [0.01722593267292154], [0.018238808563607312], [0.0925048433430448], [0.08860563190396957], [0.033328872349096254], [0.01722593267292154], [0.01722593267292154], [0.01722593267292154], [0.02374986901734404], [0.039172155988699435], [0.01722593267292154], [0.01722593267292154], [0.01722593267292154], [0.01722593267292154], [0.03979512482767438]]}, "tol": {"dims": ["iter", "suggestion"], "attrs": {}, "data": [[0.006681088011357406], [0.006681088011357406], [0.04057377831354463], [0.04057377831354463], [0.03401513207314138], [0.06200448904719951], [0.06570756365844758], [0.0531923002993439], [0.06200448904719951], [0.07448060829215868], [0.06200448904719951], [0.06200448904719951], [0.06200448904719951], [0.030598266246555306], [0.028093974260811883], [0.026979121824510056], [0.06200448904719951], [0.06200448904719951], [0.06200448904719951], [0.06200448904719951]]}, "validation_fraction": {"dims": ["iter", "suggestion"], "attrs": {}, "data": [[0.32834100356059404], [0.5674333094163946], [0.5674333094163946], [0.15446681588881195], [0.4166181739425233], [0.6164821464913788], [0.10335963436555301], [0.20243005289328364], [0.6031014248835596], [0.5487786883231046], [0.20595321718962367], [0.6164821464913788], [0.6164821464913788], [0.7643500209598995], [0.6259040187909386], [0.6164821464913788], [0.6164821464913788], [0.6164821464913788], [0.6164821464913788], [0.6164821464913788]]}}}}
