# Supplementary material
Source: ML conference proceedings conference paper supplement (https://proceedings.neurips.cc/paper_files/paper/2022/hash/31a57804448363bcab777f818f75f5b4-Abstract.html)
Supplement: Supplementary file 1 [file 31a57804448363bcab777f818f75f5b4-Supplemental-Conference.zip › trading_off_resource_budgets_f-Supplementary Material/code_and_data/experiments/base_results/bo_20220228_124924_b7rkpeqg/suggest_log/01c42ac6372351a9bbde9fc1aeced8eb.json]

{"meta": {"args": {"--uuid": "01c42ac6372351a9bbde9fc1aeced8eb", "-db-root": "/home/damon_falck/blackboxbandits/experiments/saved_results", "--opt-root": "/home/damon_falck/blackboxbandits/experiments", "--data-root": "/home/damon_falck/blackboxbandits/experiments/penn_datasets", "--db": "bo_20220228_124924_b7rkpeqg", "--opt": "OpenTuner-GA-DE", "--data": "clf-clean2", "--classifier": "lasso", "--metric": "nll", "--calls": 20, "--suggestions": 1, "--jobs-file": null, "--verbose": false, "dry_run": false, "rev": "bd14afd", "opt_rev": "0.8.7"}, "signature": [[{"C": 1.5676677195506077, "intercept_scaling": 7.257005721594282}, {"C": 2.57663857461359, "intercept_scaling": 1.5119336467641016}, {"C": 0.49501595537331966, "intercept_scaling": 3.833332156156665}, {"C": 0.5627932047415171, "intercept_scaling": 36.905577292137636}, {"C": 71.55682161754872, "intercept_scaling": 0.34179529120610125}], [0.005099014895187554, 0.003763116430615857, 0.011442254984013574, 0.010415151101547006, 0.001532741344373699]]},
"data": {"coords": {"iter": {"dims": ["iter"], "attrs": {}, "data": [0, 1, 2, 3, 4, 5, 6, 7, 8, 9, 10, 11, 12, 13, 14, 15, 16, 17, 18, 19]}, "suggestion": {"dims": ["suggestion"], "attrs": {}, "data": [0]}}, "attrs": {}, "dims": {"iter": 20, "suggestion": 1}, "data_vars": {"C": {"dims": ["iter", "suggestion"], "attrs": {}, "data": [[1.533552903343942], [24.289005620360534], [5.624033705086007], [0.5861695920417676], [0.3884332904305954], [7.31387405284493], [24.289005620360534], [24.289005620360534], [79.08639990227003], [15.272701245285363], [39.749847910586524], [18.8253368834345], [0.6796079671676278], [0.2543701322287084], [1.2187426938038712], [0.22973475015449307], [28.71991477622619], [64.89682279669162], [63.91391934749104], [34.98117534638202]]}, "intercept_scaling": {"dims": ["iter", "suggestion"], "attrs": {}, "data": [[1.684520952810032], [3.1755264357776243], [3.1755264357776243], [1.0606624136519238], [7.29688945092173], [3.1755264357776243], [0.5094518147551828], [22.635721658238577], [3.1896806195580822], [11.924760945772046], [33.213300892076774], [1.285848180196955], [12.637953348563727], [7.405261845181787], [0.4379780193673539], [18.84752796149429], [17.388985072286353], [14.518787891309596], [4.414630038624563], [18.88068363079539]]}}}}
