# Supplementary material
Source: ML conference proceedings conference paper supplement (https://proceedings.neurips.cc/paper_files/paper/2022/hash/31a57804448363bcab777f818f75f5b4-Abstract.html)
Supplement: Supplementary file 1 [file 31a57804448363bcab777f818f75f5b4-Supplemental-Conference.zip › trading_off_resource_budgets_f-Supplementary Material/code_and_data/experiments/base_results/bo_20220228_124924_b7rkpeqg/suggest_log/01d604c1ee6c55aab25be5963156441d.json]

{"meta": {"args": {"--uuid": "01d604c1ee6c55aab25be5963156441d", "-db-root": "/home/damon_falck/blackboxbandits/experiments/saved_results", "--opt-root": "/home/damon_falck/blackboxbandits/experiments", "--data-root": "/home/damon_falck/blackboxbandits/experiments/penn_datasets", "--db": "bo_20220228_124924_b7rkpeqg", "--opt": "RandomSearch", "--data": "clf-prnn-fglass", "--classifier": "lasso", "--metric": "nll", "--calls": 20, "--suggestions": 1, "--jobs-file": null, "--verbose": false, "dry_run": false, "rev": "bd14afd", "opt_rev": "0.0.8"}, "signature": [[{"C": 1.5676677195506077, "intercept_scaling": 7.257005721594282}, {"C": 2.57663857461359, "intercept_scaling": 1.5119336467641016}, {"C": 0.49501595537331966, "intercept_scaling": 3.833332156156665}, {"C": 0.5627932047415171, "intercept_scaling": 36.905577292137636}, {"C": 71.55682161754872, "intercept_scaling": 0.34179529120610125}], [1.1153405056603476, 1.1549247345762956, 1.0476439498077275, 1.0442078056841768, 1.331441323290655]]},
"data": {"coords": {"iter": {"dims": ["iter"], "attrs": {}, "data": [0, 1, 2, 3, 4, 5, 6, 7, 8, 9, 10, 11, 12, 13, 14, 15, 16, 17, 18, 19]}, "suggestion": {"dims": ["suggestion"], "attrs": {}, "data": [0]}}, "attrs": {}, "dims": {"iter": 20, "suggestion": 1}, "data_vars": {"C": {"dims": ["iter", "suggestion"], "attrs": {}, "data": [[0.09422563642038984], [14.721735491197379], [3.928655497043014], [0.40075682764151654], [0.05257061515463343], [5.9451829280732005], [12.974001975591532], [0.38305114801136253], [0.02224721480738998], [0.012802921199554784], [2.6876918094106554], [0.06808931895961914], [1.3682999636274418], [3.5113015365593454], [32.62865515943535], [0.0494437585911462], [26.335102502052585], [0.03345220155889672], [1.0374373788117686], [36.2242972529359]]}, "intercept_scaling": {"dims": ["iter", "suggestion"], "attrs": {}, "data": [[0.5601868057844791], [5.880125235452691], [2.1095228320066037], [0.055231758584754403], [0.017907338112684485], [1.0741439085916331], [9.277902576587913], [0.036716161442738926], [49.12536282391403], [0.06342241395201893], [0.0678353770832267], [77.1689648201543], [0.1388257487256196], [2.214367203466264], [11.438258335689884], [97.6988533836074], [0.011557360657307024], [0.07330326328319998], [9.11948728927281], [8.107795089550974]]}}}}
