# Supplementary material
Source: ML conference proceedings conference paper supplement (https://proceedings.neurips.cc/paper_files/paper/2022/hash/31a57804448363bcab777f818f75f5b4-Abstract.html)
Supplement: Supplementary file 1 [file 31a57804448363bcab777f818f75f5b4-Supplemental-Conference.zip › trading_off_resource_budgets_f-Supplementary Material/code_and_data/experiments/base_results/bo_20220228_124924_b7rkpeqg/suggest_log/01f0c4d57ef45590a0fb9b7109c351ec.json]

{"meta": {"args": {"--uuid": "01f0c4d57ef45590a0fb9b7109c351ec", "-db-root": "/home/damon_falck/blackboxbandits/experiments/saved_results", "--opt-root": "/home/damon_falck/blackboxbandits/experiments", "--data-root": "/home/damon_falck/blackboxbandits/experiments/penn_datasets", "--db": "bo_20220228_124924_b7rkpeqg", "--opt": "Scikit-GP-LCB", "--data": "clf-buggyCrx", "--classifier": "lasso", "--metric": "nll", "--calls": 20, "--suggestions": 1, "--jobs-file": null, "--verbose": false, "dry_run": false, "rev": "bd14afd", "opt_rev": "0.9.0"}, "signature": [[{"C": 1.5676677195506077, "intercept_scaling": 7.257005721594282}, {"C": 2.57663857461359, "intercept_scaling": 1.5119336467641016}, {"C": 0.49501595537331966, "intercept_scaling": 3.833332156156665}, {"C": 0.5627932047415171, "intercept_scaling": 36.905577292137636}, {"C": 71.55682161754872, "intercept_scaling": 0.34179529120610125}], [0.4410613338258793, 0.4996665927717917, 0.35766059489371277, 0.3634891772846133, 0.9714926899393926]]},
"data": {"coords": {"iter": {"dims": ["iter"], "attrs": {}, "data": [0, 1, 2, 3, 4, 5, 6, 7, 8, 9, 10, 11, 12, 13, 14, 15, 16, 17, 18, 19]}, "suggestion": {"dims": ["suggestion"], "attrs": {}, "data": [0]}}, "attrs": {}, "dims": {"iter": 20, "suggestion": 1}, "data_vars": {"C": {"dims": ["iter", "suggestion"], "attrs": {}, "data": [[0.02384118541370662], [0.10855333473658949], [2.7000473270349086], [66.12050046010023], [0.1426269547019008], [0.3362976260488119], [0.25217745124206137], [0.21955017661338094], [0.2241678188198836], [0.21980582974595803], [0.22559155350830656], [0.22593372709824108], [0.22618686977457844], [0.22636025446997263], [0.22643923665712873], [0.22669077892290346], [0.22645031803581642], [0.2268448859339309], [0.22787880396073953], [0.2259935017476029]]}, "intercept_scaling": {"dims": ["iter", "suggestion"], "attrs": {}, "data": [[11.389052097135432], [0.014781937811514694], [0.08086943755880184], [0.037659260109146026], [0.2501860330945388], [0.01], [100.0], [0.01], [0.01], [100.0], [0.01], [0.01], [0.01], [0.01], [0.01], [0.01], [0.01], [0.01], [0.01], [0.01]]}}}}
