# Supplementary material
Source: ML conference proceedings conference paper supplement (https://proceedings.neurips.cc/paper_files/paper/2022/hash/31a57804448363bcab777f818f75f5b4-Abstract.html)
Supplement: Supplementary file 1 [file 31a57804448363bcab777f818f75f5b4-Supplemental-Conference.zip › trading_off_resource_budgets_f-Supplementary Material/code_and_data/experiments/base_results/bo_20220228_124924_b7rkpeqg/suggest_log/01f647b4493b57e3b75156dedf30abba.json]

{"meta": {"args": {"--uuid": "01f647b4493b57e3b75156dedf30abba", "-db-root": "/home/damon_falck/blackboxbandits/experiments/saved_results", "--opt-root": "/home/damon_falck/blackboxbandits/experiments", "--data-root": "/home/damon_falck/blackboxbandits/experiments/penn_datasets", "--db": "bo_20220228_124924_b7rkpeqg", "--opt": "Scikit-GBRT-Hedge", "--data": "clf-breast", "--classifier": "lasso", "--metric": "nll", "--calls": 20, "--suggestions": 1, "--jobs-file": null, "--verbose": false, "dry_run": false, "rev": "bd14afd", "opt_rev": "0.9.0"}, "signature": [[{"C": 1.5676677195506077, "intercept_scaling": 7.257005721594282}, {"C": 2.57663857461359, "intercept_scaling": 1.5119336467641016}, {"C": 0.49501595537331966, "intercept_scaling": 3.833332156156665}, {"C": 0.5627932047415171, "intercept_scaling": 36.905577292137636}, {"C": 71.55682161754872, "intercept_scaling": 0.34179529120610125}], [0.1227525947269987, 0.12749036365037786, 0.11536255388595389, 0.11632111056532249, 0.1604214148314112]]},
"data": {"coords": {"iter": {"dims": ["iter"], "attrs": {}, "data": [0, 1, 2, 3, 4, 5, 6, 7, 8, 9, 10, 11, 12, 13, 14, 15, 16, 17, 18, 19]}, "suggestion": {"dims": ["suggestion"], "attrs": {}, "data": [0]}}, "attrs": {}, "dims": {"iter": 20, "suggestion": 1}, "data_vars": {"C": {"dims": ["iter", "suggestion"], "attrs": {}, "data": [[0.013745018512146268], [0.015783502670547084], [10.471881856359126], [0.15465090633431844], [0.01241007951039288], [0.1300264889644269], [0.048285598505597466], [0.28171467533862915], [0.0830538152999734], [0.10590517712084035], [0.15132541104829883], [0.013154486677581899], [0.15933481191352897], [0.14677731339341435], [0.20893722400529824], [0.1763917265877012], [0.17732052299068904], [0.1366357997114428], [0.11767054989595109], [0.13284481006189314]]}, "intercept_scaling": {"dims": ["iter", "suggestion"], "attrs": {}, "data": [[0.04839647340952887], [1.6186816701316746], [0.0159029850049069], [73.35865244112077], [48.82764131857106], [61.24875853679872], [0.17926965581995946], [0.030972104507305052], [68.90520461598473], [82.39452038814514], [76.46897112597262], [0.015336025820142799], [74.62120193303143], [75.21801010466376], [77.3146924237751], [77.61669438798383], [76.98357775077845], [78.18326499943028], [80.53021296007715], [81.72348938676735]]}}}}
