# Supplementary material
Source: ML conference proceedings conference paper supplement (https://proceedings.neurips.cc/paper_files/paper/2022/hash/31a57804448363bcab777f818f75f5b4-Abstract.html)
Supplement: Supplementary file 1 [file 31a57804448363bcab777f818f75f5b4-Supplemental-Conference.zip › trading_off_resource_budgets_f-Supplementary Material/code_and_data/experiments/base_results/bo_20220228_124924_b7rkpeqg/suggest_log/02a67d13591b51ac84f15cab7a78d76c.json]

{"meta": {"args": {"--uuid": "02a67d13591b51ac84f15cab7a78d76c", "-db-root": "/home/damon_falck/blackboxbandits/experiments/saved_results", "--opt-root": "/home/damon_falck/blackboxbandits/experiments", "--data-root": "/home/damon_falck/blackboxbandits/experiments/penn_datasets", "--db": "bo_20220228_124924_b7rkpeqg", "--opt": "Scikit-GBRT-Hedge", "--data": "reg-609-fri-c0-1000-5", "--classifier": "lasso", "--metric": "mse", "--calls": 20, "--suggestions": 1, "--jobs-file": null, "--verbose": false, "dry_run": false, "rev": "bd14afd", "opt_rev": "0.9.0"}, "signature": [[{"alpha": 1.5676677195506077, "fit_intercept": true, "max_iter": 423, "normalize": true, "positive": false, "tol": 0.0038333321561566623}, {"alpha": 0.5627932047415171, "fit_intercept": true, "max_iter": 3989, "normalize": false, "positive": true, "tol": 0.001304907355036239}, {"alpha": 1.871450068624068, "fit_intercept": true, "max_iter": 16, "normalize": false, "positive": false, "tol": 0.021403233140986057}, {"alpha": 12.960656597279737, "fit_intercept": true, "max_iter": 4378, "normalize": true, "positive": false, "tol": 0.013246974647468445}, {"alpha": 0.029723346443356558, "fit_intercept": true, "max_iter": 24, "normalize": true, "positive": true, "tol": 0.00045566719139214756}], [0.9766624099359833, 0.9763081248204968, 0.9766624099359833, 0.9766624099359833, 0.9766624099359833]]},
"data": {"coords": {"iter": {"dims": ["iter"], "attrs": {}, "data": [0, 1, 2, 3, 4, 5, 6, 7, 8, 9, 10, 11, 12, 13, 14, 15, 16, 17, 18, 19]}, "suggestion": {"dims": ["suggestion"], "attrs": {}, "data": [0]}}, "attrs": {}, "dims": {"iter": 20, "suggestion": 1}, "data_vars": {"alpha": {"dims": ["iter", "suggestion"], "attrs": {}, "data": [[2.406867385794935], [0.011475000446315163], [97.04566626879591], [5.580499349692182], [0.0373130671306077], [0.057371180634648966], [0.0429625168482883], [0.03963603395507619], [0.0343625024402225], [0.043835694359162174], [0.045412621044960265], [0.04987332448336736], [0.023703069929755512], [0.03934444611409667], [0.04640425208313801], [0.024375833254021782], [0.04358946967671267], [0.04734233137053079], [3.3301538710251006], [0.015706657288052803]]}, "fit_intercept": {"dims": ["iter", "suggestion"], "attrs": {}, "data": [[1], [1], [1], [0], [1], [0], [0], [1], [0], [0], [0], [0], [0], [0], [0], [0], [0], [1], [1], [0]]}, "max_iter": {"dims": ["iter", "suggestion"], "attrs": {}, "data": [[1847], [2024], [1676], [4149], [2948], [3350], [3586], [3103], [2700], [3283], [3904], [2961], [3201], [3342], [2828], [4699], [2924], [3593], [2865], [744]]}, "normalize": {"dims": ["iter", "suggestion"], "attrs": {}, "data": [[0], [1], [1], [1], [0], [0], [0], [0], [0], [0], [0], [0], [0], [0], [1], [0], [0], [0], [1], [0]]}, "positive": {"dims": ["iter", "suggestion"], "attrs": {}, "data": [[1], [0], [1], [1], [1], [1], [1], [1], [1], [1], [1], [1], [1], [0], [1], [1], [1], [0], [0], [1]]}, "tol": {"dims": ["iter", "suggestion"], "attrs": {}, "data": [[1.649111935666503e-05], [0.025551201889795733], [5.853337475732124e-05], [0.00012537248927328408], [0.0018226480904493208], [0.0027681034173184706], [0.0067641425521019986], [0.004570481961255038], [0.005383299612979573], [0.0009314058029751771], [0.003475045026121824], [0.02485716689439092], [0.0048692739481006626], [0.02238378198932632], [0.0029172823951965562], [2.0060927136808584e-05], [0.02362258474081829], [0.05387791166712752], [0.032805704048559016], [7.48684485124781e-05]]}}}}
