# Supplementary material
Source: ML conference proceedings conference paper supplement (https://proceedings.neurips.cc/paper_files/paper/2022/hash/31a57804448363bcab777f818f75f5b4-Abstract.html)
Supplement: Supplementary file 1 [file 31a57804448363bcab777f818f75f5b4-Supplemental-Conference.zip › trading_off_resource_budgets_f-Supplementary Material/code_and_data/experiments/base_results/bo_20220228_124924_b7rkpeqg/suggest_log/02d77abe07e5569084b8206dac9c1282.json]

{"meta": {"args": {"--uuid": "02d77abe07e5569084b8206dac9c1282", "-db-root": "/home/damon_falck/blackboxbandits/experiments/saved_results", "--opt-root": "/home/damon_falck/blackboxbandits/experiments", "--data-root": "/home/damon_falck/blackboxbandits/experiments/penn_datasets", "--db": "bo_20220228_124924_b7rkpeqg", "--opt": "HyperOpt", "--data": "clf-breast-w", "--classifier": "lasso", "--metric": "nll", "--calls": 20, "--suggestions": 1, "--jobs-file": null, "--verbose": false, "dry_run": false, "rev": "bd14afd", "opt_rev": "0.2.7"}, "signature": [[{"C": 1.5676677195506077, "intercept_scaling": 7.257005721594282}, {"C": 2.57663857461359, "intercept_scaling": 1.5119336467641016}, {"C": 0.49501595537331966, "intercept_scaling": 3.833332156156665}, {"C": 0.5627932047415171, "intercept_scaling": 36.905577292137636}, {"C": 71.55682161754872, "intercept_scaling": 0.34179529120610125}], [0.137491989009565, 0.1440497345162276, 0.1220719598453727, 0.12363769620754841, 0.22141328343920813]]},
"data": {"coords": {"iter": {"dims": ["iter"], "attrs": {}, "data": [0, 1, 2, 3, 4, 5, 6, 7, 8, 9, 10, 11, 12, 13, 14, 15, 16, 17, 18, 19]}, "suggestion": {"dims": ["suggestion"], "attrs": {}, "data": [0]}}, "attrs": {}, "dims": {"iter": 20, "suggestion": 1}, "data_vars": {"C": {"dims": ["iter", "suggestion"], "attrs": {}, "data": [[0.01637466869630487], [24.959588727440067], [5.062997807127142], [1.130500827533822], [34.726338042108424], [0.16594298503064767], [6.984031417040157], [1.0252185707014527], [32.3439223499266], [0.08236383743085478], [0.06809998145143147], [0.027140451596838117], [10.855219821260409], [0.024325573929062344], [1.9189684396390934], [0.06164551818518639], [0.12238390834983734], [0.5368982436781611], [25.241793396846322], [4.354842351249681]]}, "intercept_scaling": {"dims": ["iter", "suggestion"], "attrs": {}, "data": [[16.58369202793677], [0.8185552407206511], [0.10966114641954124], [30.53511698557588], [0.09102742298882605], [0.15323190606297968], [1.4841193687345156], [0.5939850324932598], [77.66616537285721], [3.1133833120954413], [87.47470367387307], [2.8929357410681953], [5.458741097952112], [29.230254158006588], [75.0026537704937], [0.11350690345714694], [0.30395605851857305], [0.6645049780989616], [0.1300946053545267], [0.08752891313429458]]}}}}
