# Supplementary material
Source: ML conference proceedings conference paper supplement (https://proceedings.neurips.cc/paper_files/paper/2022/hash/31a57804448363bcab777f818f75f5b4-Abstract.html)
Supplement: Supplementary file 1 [file 31a57804448363bcab777f818f75f5b4-Supplemental-Conference.zip › trading_off_resource_budgets_f-Supplementary Material/code_and_data/experiments/base_results/bo_20220228_124924_b7rkpeqg/suggest_log/02eeb8fe3a1b5c808f408dd2276be195.json]

{"meta": {"args": {"--uuid": "02eeb8fe3a1b5c808f408dd2276be195", "-db-root": "/home/damon_falck/blackboxbandits/experiments/saved_results", "--opt-root": "/home/damon_falck/blackboxbandits/experiments", "--data-root": "/home/damon_falck/blackboxbandits/experiments/penn_datasets", "--db": "bo_20220228_124924_b7rkpeqg", "--opt": "OpenTuner-GA", "--data": "clf-page-blocks", "--classifier": "lasso", "--metric": "nll", "--calls": 20, "--suggestions": 1, "--jobs-file": null, "--verbose": false, "dry_run": false, "rev": "bd14afd", "opt_rev": "0.8.7"}, "signature": [[{"C": 1.5676677195506077, "intercept_scaling": 7.257005721594282}, {"C": 2.57663857461359, "intercept_scaling": 1.5119336467641016}, {"C": 0.49501595537331966, "intercept_scaling": 3.833332156156665}, {"C": 0.5627932047415171, "intercept_scaling": 36.905577292137636}, {"C": 71.55682161754872, "intercept_scaling": 0.34179529120610125}], [0.14535232171503915, 0.15109437763388517, 0.1470055720895191, 0.14647652450302578, 0.1703027914820759]]},
"data": {"coords": {"iter": {"dims": ["iter"], "attrs": {}, "data": [0, 1, 2, 3, 4, 5, 6, 7, 8, 9, 10, 11, 12, 13, 14, 15, 16, 17, 18, 19]}, "suggestion": {"dims": ["suggestion"], "attrs": {}, "data": [0]}}, "attrs": {}, "dims": {"iter": 20, "suggestion": 1}, "data_vars": {"C": {"dims": ["iter", "suggestion"], "attrs": {}, "data": [[3.413851062646346], [81.70352601557381], [9.748794461449574], [58.86515152529945], [10.858781200622984], [3.413851062646346], [13.739354470966964], [54.36084385219096], [52.17558334447196], [40.707379650349075], [3.413851062646346], [3.413851062646346], [50.137608711401114], [6.3266591817049855], [3.413851062646346], [69.13351098745937], [4.011598840281589], [3.413851062646346], [24.454880973066345], [3.413851062646346]]}, "intercept_scaling": {"dims": ["iter", "suggestion"], "attrs": {}, "data": [[16.059461172801296], [50.94820333558399], [4.572122502034238], [16.059461172801296], [8.81383683063825], [55.47005733959941], [16.059461172801296], [32.7964053398433], [4.586460906041771], [16.059461172801296], [27.73111856266249], [2.557462475689283], [2.557462475689283], [2.557462475689283], [54.32506019237576], [2.557462475689283], [2.557462475689283], [0.48848727020790794], [0.48848727020790794], [0.9112245157383385]]}}}}
