# Supplementary material
Source: ML conference proceedings conference paper supplement (https://proceedings.neurips.cc/paper_files/paper/2022/hash/31a57804448363bcab777f818f75f5b4-Abstract.html)
Supplement: Supplementary file 1 [file 31a57804448363bcab777f818f75f5b4-Supplemental-Conference.zip › trading_off_resource_budgets_f-Supplementary Material/code_and_data/experiments/base_results/bo_20220228_124924_b7rkpeqg/suggest_log/02ffc81595da5bc58413d4fba5bc4bcf.json]

{"meta": {"args": {"--uuid": "02ffc81595da5bc58413d4fba5bc4bcf", "-db-root": "/home/damon_falck/blackboxbandits/experiments/saved_results", "--opt-root": "/home/damon_falck/blackboxbandits/experiments", "--data-root": "/home/damon_falck/blackboxbandits/experiments/penn_datasets", "--db": "bo_20220228_124924_b7rkpeqg", "--opt": "OpenTuner-BanditA", "--data": "clf-glass", "--classifier": "MLP-adam", "--metric": "nll", "--calls": 20, "--suggestions": 1, "--jobs-file": null, "--verbose": false, "dry_run": false, "rev": "bd14afd", "opt_rev": "0.8.7"}, "signature": [[{"alpha": 0.019628224813442792, "batch_size": 182, "beta_1": 0.9410202200271762, "beta_2": 0.9998021557676793, "epsilon": 1.8662266976518e-08, "hidden_layer_sizes": 147, "learning_rate_init": 0.0005627932047415167, "tol": 0.03690557729213761, "validation_fraction": 0.8846827852548593}, {"alpha": 0.001998246739232944, "batch_size": 200, "beta_1": 0.919111482530466, "beta_2": 0.9998488260436156, "epsilon": 5.981221901152555e-07, "hidden_layer_sizes": 61, "learning_rate_init": 2.2310905607443014e-05, "tol": 1.2046852412030316e-05, "validation_fraction": 0.8117896445826539}, {"alpha": 0.46659545670218433, "batch_size": 219, "beta_1": 0.9889789783750891, "beta_2": 0.9999896868093284, "epsilon": 2.4234724484675948e-08, "hidden_layer_sizes": 167, "learning_rate_init": 2.972334644335654e-05, "tol": 0.0036281404040243792, "validation_fraction": 0.17260651658522078}, {"alpha": 4.656005689076002, "batch_size": 135, "beta_1": 0.870503881627747, "beta_2": 0.9948873266941017, "epsilon": 2.1023308743480125e-07, "hidden_layer_sizes": 118, "learning_rate_init": 0.001878173875716191, "tol": 1.1889379831773006e-05, "validation_fraction": 0.6264327093752792}, {"alpha": 0.04705159350400542, "batch_size": 158, "beta_1": 0.9870884262730957, "beta_2": 0.9999596874382349, "epsilon": 1.1981845126013875e-08, "hidden_layer_sizes": 116, "learning_rate_init": 0.006173405204074311, "tol": 1.7414134181586194e-05, "validation_fraction": 0.6754299026638921}], [1.6308874225241337, 1.7407337942654746, 1.7301735420287805, 1.2562940800500624, 1.3719740276873817]]},
"data": {"coords": {"iter": {"dims": ["iter"], "attrs": {}, "data": [0, 1, 2, 3, 4, 5, 6, 7, 8, 9, 10, 11, 12, 13, 14, 15, 16, 17, 18, 19]}, "suggestion": {"dims": ["suggestion"], "attrs": {}, "data": [0]}}, "attrs": {}, "dims": {"iter": 20, "suggestion": 1}, "data_vars": {"alpha": {"dims": ["iter", "suggestion"], "attrs": {}, "data": [[0.21260226217692607], [7.770562779566898], [1.5870259213163949], [1.2645145811853467], [3.5003063197737245], [3.7493897352231245], [9.546103070282932], [6.545850328987242], [1.5870259213163949], [1.5870259213163949], [1.5870259213163949], [3.5198586457633936], [1.5870259213163949], [0.16733257876082658], [1.5870259213163949], [1.5870259213163949], [2.7660389636489664], [0.6336850874685885], [1.5870259213163949], [1.0801406740324362]]}, "batch_size": {"dims": ["iter", "suggestion"], "attrs": {}, "data": [[155], [89], [74], [97], [26], [84], [74], [43], [212], [212], [212], [212], [245], [30], [131], [212], [190], [95], [212], [212]]}, "beta_1": {"dims": ["iter", "suggestion"], "attrs": {}, "data": [[0.9501096017611149], [0.9240602253901895], [0.9453558495685346], [0.9310681294723069], [0.6237423595123363], [0.9664560099746252], [0.9453558495685346], [0.8809470340006209], [0.5280786336885936], [0.5280786336885936], [0.5222213688608713], [0.5222213688608713], [0.7242691066096607], [0.7599343751054145], [0.5222213688608713], [0.5222213688608713], [0.7143161628337799], [0.5833010655199042], [0.5222213688608713], [0.5222213688608713]]}, "beta_2": {"dims": ["iter", "suggestion"], "attrs": {}, "data": [[0.9182482579375639], [0.9302199353311071], [0.9977609344219203], [0.9887190503779115], [0.9217945257803781], [0.9854349094451694], [0.9977609344219203], [0.988796072260468], [0.9977609344219203], [0.9965814545364448], [0.9977609344219203], [0.9977609344219203], [0.9977609344219203], [0.9425707891056629], [0.9977609344219203], [0.9977609344219203], [0.9636696313417212], [0.9611879342911737], [0.9977609344219203], [0.9977609344219203]]}, "epsilon": {"dims": ["iter", "suggestion"], "attrs": {}, "data": [[7.175325139890654e-07], [7.879918619007876e-07], [6.194497809424982e-07], [6.319962854444961e-07], [4.00934585892936e-07], [9.19710833186509e-07], [6.194497809424982e-07], [5.344251020894243e-07], [6.194497809424982e-07], [6.194497809424982e-07], [6.194497809424982e-07], [6.194497809424982e-07], [6.194497809424982e-07], [8.253082336711893e-07], [2.1979462974716545e-07], [6.194497809424982e-07], [8.272609909603924e-07], [8.185381132069503e-07], [6.194497809424982e-07], [6.194497809424982e-07]]}, "hidden_layer_sizes": {"dims": ["iter", "suggestion"], "attrs": {}, "data": [[167], [65], [108], [126], [188], [193], [108], [70], [108], [108], [108], [115], [108], [152], [108], [108], [176], [91], [108], [108]]}, "learning_rate_init": {"dims": ["iter", "suggestion"], "attrs": {}, "data": [[0.0542892030392163], [0.075730626815311], [0.03970431483636088], [0.03970431483636088], [0.060664849436644123], [0.08493966741474461], [0.08534326420886444], [0.06196755066242348], [0.03970431483636088], [0.03970431483636088], [0.03970431483636088], [0.03970431483636088], [0.03970431483636088], [0.09398607882956515], [0.03970431483636088], [0.03970431483636088], [0.04893610128939157], [0.07483796909429234], [0.03970431483636088], [0.03970431483636088]]}, "tol": {"dims": ["iter", "suggestion"], "attrs": {}, "data": [[0.050681280270642164], [0.06242977392912013], [0.04392533696371819], [0.0497043279286719], [0.04025884702111953], [0.04192767753596132], [0.04392533696371819], [0.07035280335778686], [0.030758112283461637], [0.030758112283461637], [0.030758112283461637], [0.03768573887482878], [0.030758112283461637], [0.09595316128712532], [0.030758112283461637], [0.06082798367918978], [0.0637886507926541], [0.043039540071499065], [0.030758112283461637], [0.030758112283461637]]}, "validation_fraction": {"dims": ["iter", "suggestion"], "attrs": {}, "data": [[0.45637246104494844], [0.1317937749969695], [0.11117622253533731], [0.14356377825267772], [0.5348319062825686], [0.6401407686248264], [0.11117622253533731], [0.16707082062180784], [0.20978358493596494], [0.20978358493596494], [0.20978358493596494], [0.20978358493596494], [0.20978358493596494], [0.3697702265003814], [0.5236739593700185], [0.20978358493596494], [0.711931098012676], [0.15005038529155162], [0.34496016010494035], [0.20978358493596494]]}}}}
