# Supplementary material
Source: ML conference proceedings conference paper supplement (https://proceedings.neurips.cc/paper_files/paper/2022/hash/31a57804448363bcab777f818f75f5b4-Abstract.html)
Supplement: Supplementary file 1 [file 31a57804448363bcab777f818f75f5b4-Supplemental-Conference.zip › trading_off_resource_budgets_f-Supplementary Material/code_and_data/experiments/base_results/bo_20220228_124924_b7rkpeqg/suggest_log/03a8dfd3c38f5df79f13943bfcb6a980.json]

{"meta": {"args": {"--uuid": "03a8dfd3c38f5df79f13943bfcb6a980", "-db-root": "/home/damon_falck/blackboxbandits/experiments/saved_results", "--opt-root": "/home/damon_falck/blackboxbandits/experiments", "--data-root": "/home/damon_falck/blackboxbandits/experiments/penn_datasets", "--db": "bo_20220228_124924_b7rkpeqg", "--opt": "RandomSearch", "--data": "reg-620-fri-c1-1000-25", "--classifier": "MLP-adam", "--metric": "mse", "--calls": 20, "--suggestions": 1, "--jobs-file": null, "--verbose": false, "dry_run": false, "rev": "bd14afd", "opt_rev": "0.0.8"}, "signature": [[{"alpha": 0.019628224813442792, "batch_size": 182, "beta_1": 0.9410202200271762, "beta_2": 0.9998021557676793, "epsilon": 1.8662266976518e-08, "hidden_layer_sizes": 147, "learning_rate_init": 0.0005627932047415167, "tol": 0.03690557729213761, "validation_fraction": 0.8846827852548593}, {"alpha": 0.001998246739232944, "batch_size": 200, "beta_1": 0.919111482530466, "beta_2": 0.9998488260436156, "epsilon": 5.981221901152555e-07, "hidden_layer_sizes": 61, "learning_rate_init": 2.2310905607443014e-05, "tol": 1.2046852412030316e-05, "validation_fraction": 0.8117896445826539}, {"alpha": 0.46659545670218433, "batch_size": 219, "beta_1": 0.9889789783750891, "beta_2": 0.9999896868093284, "epsilon": 2.4234724484675948e-08, "hidden_layer_sizes": 167, "learning_rate_init": 2.972334644335654e-05, "tol": 0.0036281404040243792, "validation_fraction": 0.17260651658522078}, {"alpha": 4.656005689076002, "batch_size": 135, "beta_1": 0.870503881627747, "beta_2": 0.9948873266941017, "epsilon": 2.1023308743480125e-07, "hidden_layer_sizes": 118, "learning_rate_init": 0.001878173875716191, "tol": 1.1889379831773006e-05, "validation_fraction": 0.6264327093752792}, {"alpha": 0.04705159350400542, "batch_size": 158, "beta_1": 0.9870884262730957, "beta_2": 0.9999596874382349, "epsilon": 1.1981845126013875e-08, "hidden_layer_sizes": 116, "learning_rate_init": 0.006173405204074311, "tol": 1.7414134181586194e-05, "validation_fraction": 0.6754299026638921}], [1.0517266645365206, 1.4306755174012715, 1.003855311585485, 0.7737650308246555, 0.8630087204432237]]},
"data": {"coords": {"iter": {"dims": ["iter"], "attrs": {}, "data": [0, 1, 2, 3, 4, 5, 6, 7, 8, 9, 10, 11, 12, 13, 14, 15, 16, 17, 18, 19]}, "suggestion": {"dims": ["suggestion"], "attrs": {}, "data": [0]}}, "attrs": {}, "dims": {"iter": 20, "suggestion": 1}, "data_vars": {"alpha": {"dims": ["iter", "suggestion"], "attrs": {}, "data": [[9.929357686922943], [0.008462256168238659], [9.247240883944025e-05], [3.0597200349594167], [4.988605100518874], [2.4365701097063344e-05], [0.025815494278419157], [2.856191409471045e-05], [4.909042305133968e-05], [0.004378759485079296], [3.2669569784791146], [0.001501323203083594], [2.143453741982012], [0.07650307937321593], [2.9157118348709968e-05], [0.12304307324748286], [0.000539745179183858], [0.09530815010385099], [0.018807056350057416], [0.008445812929453416]]}, "batch_size": {"dims": ["iter", "suggestion"], "attrs": {}, "data": [[161], [235], [32], [174], [30], [157], [211], [203], [166], [26], [98], [95], [204], [22], [199], [39], [46], [30], [221], [157]]}, "beta_1": {"dims": ["iter", "suggestion"], "attrs": {}, "data": [[0.8582297218067588], [0.7245824183875943], [0.9790609430143519], [0.9228660328239414], [0.5716209201996293], [0.7057380829660446], [0.7886382975947877], [0.9786136366956951], [0.8527311991088841], [0.9208057418275238], [0.5053838293424375], [0.7962340069430156], [0.6176896852724143], [0.9319238428895621], [0.9634707543535641], [0.8514953286408087], [0.836759352912461], [0.9865149550739432], [0.7422200169991331], [0.986959155537361]]}, "beta_2": {"dims": ["iter", "suggestion"], "attrs": {}, "data": [[0.9999545268802416], [0.9993884123762524], [0.998774292289004], [0.9999987176409377], [0.9852946210314434], [0.9882570919862864], [0.9607017585208933], [0.9989420890466941], [0.9999989662031932], [0.9996296009004241], [0.9806177605201616], [0.9647824305345899], [0.950915991182678], [0.9999648602404677], [0.9999975806761889], [0.9999948815643956], [0.9722410399390593], [0.9992557971185372], [0.9999936238434065], [0.9999953485507034]]}, "epsilon": {"dims": ["iter", "suggestion"], "attrs": {}, "data": [[2.3690277875935331e-07], [1.47934478786187e-07], [3.0338118032357697e-09], [4.30580459052242e-08], [1.8866078840048843e-09], [9.993587639086475e-09], [1.0651807078967265e-07], [2.4577249586648505e-09], [7.612232844104476e-07], [6.661192724401471e-08], [5.380963732727944e-07], [5.1339358498936204e-08], [1.8911477221758517e-09], [1.660304110725767e-07], [2.615065162150311e-07], [8.207173953224481e-07], [2.32492070288803e-08], [4.080116257575209e-07], [4.627788512134322e-09], [5.1072712700453146e-08]]}, "hidden_layer_sizes": {"dims": ["iter", "suggestion"], "attrs": {}, "data": [[175], [108], [180], [109], [158], [53], [117], [95], [68], [166], [77], [133], [102], [118], [159], [90], [135], [100], [191], [73]]}, "learning_rate_init": {"dims": ["iter", "suggestion"], "attrs": {}, "data": [[0.00043299153156157376], [0.00013458651884143438], [0.003533576627956135], [0.007030653573070745], [0.008562381551978743], [0.008464953293885509], [3.269927656547278e-05], [6.77590636695423e-05], [2.6624869299837315e-05], [4.492385865275389e-05], [0.07069784520016882], [0.007968199996299673], [0.00337357361130445], [0.000699946409299831], [0.00014522737972986504], [0.00015153972661131345], [0.08648445093216282], [0.059919494209926955], [0.02428452363026358], [0.06460798287966261]]}, "tol": {"dims": ["iter", "suggestion"], "attrs": {}, "data": [[0.09147318797600357], [0.011737297961742112], [0.0001654066973123001], [0.024716980747210848], [0.00585784134823527], [0.032363022088326136], [0.00030114359499859616], [0.00018827653833146426], [5.8430640597940356e-05], [0.020970726787282287], [0.00015000595175480231], [0.00025778323911848823], [0.0016009661907333303], [7.124191549716448e-05], [2.2935913911320584e-05], [0.0008804504054537983], [0.08541360830537108], [0.000966602874403004], [8.378547500865075e-05], [2.2138768079477303e-05]]}, "validation_fraction": {"dims": ["iter", "suggestion"], "attrs": {}, "data": [[0.8058030374596643], [0.11240448385547636], [0.3875059323069888], [0.6629226188545679], [0.5521218355492242], [0.7115104560338917], [0.20668001343802547], [0.8343393636664959], [0.43266159124967163], [0.13577555326874233], [0.4746745165502682], [0.573677670842336], [0.4757495504248474], [0.6403621947472021], [0.7798704889839303], [0.28884599862593685], [0.30558289814535167], [0.8793330536745368], [0.39840212168628175], [0.11636469678245197]]}}}}
