# Supplementary material
Source: ML conference proceedings conference paper supplement (https://proceedings.neurips.cc/paper_files/paper/2022/hash/31a57804448363bcab777f818f75f5b4-Abstract.html)
Supplement: Supplementary file 1 [file 31a57804448363bcab777f818f75f5b4-Supplemental-Conference.zip › trading_off_resource_budgets_f-Supplementary Material/code_and_data/experiments/base_results/bo_20220228_124924_b7rkpeqg/suggest_log/03c6132625525dd3913d7436e9d5f6ca.json]

{"meta": {"args": {"--uuid": "03c6132625525dd3913d7436e9d5f6ca", "-db-root": "/home/damon_falck/blackboxbandits/experiments/saved_results", "--opt-root": "/home/damon_falck/blackboxbandits/experiments", "--data-root": "/home/damon_falck/blackboxbandits/experiments/penn_datasets", "--db": "bo_20220228_124924_b7rkpeqg", "--opt": "Scikit-GBRT-Hedge", "--data": "clf-crx", "--classifier": "lasso", "--metric": "nll", "--calls": 20, "--suggestions": 1, "--jobs-file": null, "--verbose": false, "dry_run": false, "rev": "bd14afd", "opt_rev": "0.9.0"}, "signature": [[{"C": 1.5676677195506077, "intercept_scaling": 7.257005721594282}, {"C": 2.57663857461359, "intercept_scaling": 1.5119336467641016}, {"C": 0.49501595537331966, "intercept_scaling": 3.833332156156665}, {"C": 0.5627932047415171, "intercept_scaling": 36.905577292137636}, {"C": 71.55682161754872, "intercept_scaling": 0.34179529120610125}], [0.45043935633122806, 0.5073289932974288, 0.35720355913116597, 0.3648054037074824, 0.9732138735963334]]},
"data": {"coords": {"iter": {"dims": ["iter"], "attrs": {}, "data": [0, 1, 2, 3, 4, 5, 6, 7, 8, 9, 10, 11, 12, 13, 14, 15, 16, 17, 18, 19]}, "suggestion": {"dims": ["suggestion"], "attrs": {}, "data": [0]}}, "attrs": {}, "dims": {"iter": 20, "suggestion": 1}, "data_vars": {"C": {"dims": ["iter", "suggestion"], "attrs": {}, "data": [[34.998426964202835], [1.309585403135696], [0.012079124643676236], [5.973031452298476], [0.07959945398562446], [0.04058468398399899], [0.06313681250797237], [0.1554606106723202], [20.440053842727288], [0.16871505971979447], [0.24180928126292636], [29.212123335979918], [0.15267915596837042], [0.16918270634824414], [0.16156133603078174], [0.18591701834741026], [0.23406013837205913], [0.24425754294557336], [0.26648883952737334], [0.20256659331601828]]}, "intercept_scaling": {"dims": ["iter", "suggestion"], "attrs": {}, "data": [[0.8663778043060213], [10.23491919534363], [0.03178584114429783], [2.363898730772443], [12.290160655070364], [96.74180930930135], [28.817047052021618], [12.534868834551201], [18.96570199696274], [14.980579035113546], [15.608723674215012], [0.33966318421837666], [14.47152151844103], [15.07759867294972], [14.83883441526253], [15.211975887326073], [15.201809918161242], [15.300512718358744], [15.216106724607188], [12.55265029289629]]}}}}
