# Supplementary material
Source: ML conference proceedings conference paper supplement (https://proceedings.neurips.cc/paper_files/paper/2022/hash/31a57804448363bcab777f818f75f5b4-Abstract.html)
Supplement: Supplementary file 1 [file 31a57804448363bcab777f818f75f5b4-Supplemental-Conference.zip › trading_off_resource_budgets_f-Supplementary Material/code_and_data/experiments/base_results/bo_20220228_124924_b7rkpeqg/suggest_log/03d925db998c58e5972224c840034c40.json]

{"meta": {"args": {"--uuid": "03d925db998c58e5972224c840034c40", "-db-root": "/home/damon_falck/blackboxbandits/experiments/saved_results", "--opt-root": "/home/damon_falck/blackboxbandits/experiments", "--data-root": "/home/damon_falck/blackboxbandits/experiments/penn_datasets", "--db": "bo_20220228_124924_b7rkpeqg", "--opt": "OpenTuner-GA", "--data": "reg-583-fri-c1-1000-50", "--classifier": "lasso", "--metric": "mse", "--calls": 20, "--suggestions": 1, "--jobs-file": null, "--verbose": false, "dry_run": false, "rev": "bd14afd", "opt_rev": "0.8.7"}, "signature": [[{"alpha": 1.5676677195506077, "fit_intercept": true, "max_iter": 423, "normalize": true, "positive": false, "tol": 0.0038333321561566623}, {"alpha": 0.5627932047415171, "fit_intercept": true, "max_iter": 3989, "normalize": false, "positive": true, "tol": 0.001304907355036239}, {"alpha": 1.871450068624068, "fit_intercept": true, "max_iter": 16, "normalize": false, "positive": false, "tol": 0.021403233140986057}, {"alpha": 12.960656597279737, "fit_intercept": true, "max_iter": 4378, "normalize": true, "positive": false, "tol": 0.013246974647468445}, {"alpha": 0.029723346443356558, "fit_intercept": true, "max_iter": 24, "normalize": true, "positive": true, "tol": 0.00045566719139214756}], [0.9960179869245798, 0.9960179869245798, 0.9960179869245798, 0.9960179869245798, 0.9960179869245798]]},
"data": {"coords": {"iter": {"dims": ["iter"], "attrs": {}, "data": [0, 1, 2, 3, 4, 5, 6, 7, 8, 9, 10, 11, 12, 13, 14, 15, 16, 17, 18, 19]}, "suggestion": {"dims": ["suggestion"], "attrs": {}, "data": [0]}}, "attrs": {}, "dims": {"iter": 20, "suggestion": 1}, "data_vars": {"alpha": {"dims": ["iter", "suggestion"], "attrs": {}, "data": [[2.57581272309391], [7.029048697425852], [8.988817433333558], [2.57581272309391], [2.8933677832717093], [1.0108784666932158], [11.645255945284573], [11.645255945284573], [11.645255945284573], [3.7289508391922057], [11.645255945284573], [11.645255945284573], [5.415422402202497], [6.9448175011332545], [6.9448175011332545], [3.500162309697588], [3.500162309697588], [29.490805545804534], [0.3097993414367146], [0.3097993414367146]]}, "fit_intercept": {"dims": ["iter", "suggestion"], "attrs": {}, "data": [[0], [0], [0], [0], [0], [0], [1], [1], [1], [0], [0], [1], [1], [1], [1], [0], [0], [0], [1], [1]]}, "max_iter": {"dims": ["iter", "suggestion"], "attrs": {}, "data": [[210], [157], [210], [210], [49], [81], [1555], [1208], [1555], [68], [1555], [1555], [41], [3829], [3829], [18], [18], [10], [11], [11]]}, "normalize": {"dims": ["iter", "suggestion"], "attrs": {}, "data": [[0], [1], [0], [0], [1], [0], [0], [0], [0], [0], [0], [0], [1], [0], [0], [0], [0], [0], [0], [1]]}, "positive": {"dims": ["iter", "suggestion"], "attrs": {}, "data": [[0], [0], [0], [0], [0], [0], [1], [1], [1], [1], [1], [0], [1], [1], [1], [0], [0], [1], [1], [1]]}, "tol": {"dims": ["iter", "suggestion"], "attrs": {}, "data": [[0.032566362003240305], [0.07743254484490729], [0.032566362003240305], [0.03567952657043987], [0.03860528214461117], [0.014395524190740683], [0.07285862713309214], [0.07285862713309214], [0.09707240006380251], [0.017487904553498735], [0.07285862713309214], [0.07285862713309214], [0.05239532688096132], [0.012165977789746419], [0.012165977789746419], [0.01088823287036782], [0.01088823287036782], [0.0034864725546343467], [0.07285862713309214], [0.07285862713309214]]}}}}
