# Supplementary material
Source: ML conference proceedings conference paper supplement (https://proceedings.neurips.cc/paper_files/paper/2022/hash/31a57804448363bcab777f818f75f5b4-Abstract.html)
Supplement: Supplementary file 1 [file 31a57804448363bcab777f818f75f5b4-Supplemental-Conference.zip › trading_off_resource_budgets_f-Supplementary Material/code_and_data/experiments/base_results/bo_20220228_124924_b7rkpeqg/suggest_log/04cdf48ea10650bf94ba2ea437221fe8.json]

{"meta": {"args": {"--uuid": "04cdf48ea10650bf94ba2ea437221fe8", "-db-root": "/home/damon_falck/blackboxbandits/experiments/saved_results", "--opt-root": "/home/damon_falck/blackboxbandits/experiments", "--data-root": "/home/damon_falck/blackboxbandits/experiments/penn_datasets", "--db": "bo_20220228_124924_b7rkpeqg", "--opt": "RandomSearch", "--data": "clf-monk2", "--classifier": "MLP-adam", "--metric": "nll", "--calls": 20, "--suggestions": 1, "--jobs-file": null, "--verbose": false, "dry_run": false, "rev": "bd14afd", "opt_rev": "0.0.8"}, "signature": [[{"alpha": 0.019628224813442792, "batch_size": 182, "beta_1": 0.9410202200271762, "beta_2": 0.9998021557676793, "epsilon": 1.8662266976518e-08, "hidden_layer_sizes": 147, "learning_rate_init": 0.0005627932047415167, "tol": 0.03690557729213761, "validation_fraction": 0.8846827852548593}, {"alpha": 0.001998246739232944, "batch_size": 200, "beta_1": 0.919111482530466, "beta_2": 0.9998488260436156, "epsilon": 5.981221901152555e-07, "hidden_layer_sizes": 61, "learning_rate_init": 2.2310905607443014e-05, "tol": 1.2046852412030316e-05, "validation_fraction": 0.8117896445826539}, {"alpha": 0.46659545670218433, "batch_size": 219, "beta_1": 0.9889789783750891, "beta_2": 0.9999896868093284, "epsilon": 2.4234724484675948e-08, "hidden_layer_sizes": 167, "learning_rate_init": 2.972334644335654e-05, "tol": 0.0036281404040243792, "validation_fraction": 0.17260651658522078}, {"alpha": 4.656005689076002, "batch_size": 135, "beta_1": 0.870503881627747, "beta_2": 0.9948873266941017, "epsilon": 2.1023308743480125e-07, "hidden_layer_sizes": 118, "learning_rate_init": 0.001878173875716191, "tol": 1.1889379831773006e-05, "validation_fraction": 0.6264327093752792}, {"alpha": 0.04705159350400542, "batch_size": 158, "beta_1": 0.9870884262730957, "beta_2": 0.9999596874382349, "epsilon": 1.1981845126013875e-08, "hidden_layer_sizes": 116, "learning_rate_init": 0.006173405204074311, "tol": 1.7414134181586194e-05, "validation_fraction": 0.6754299026638921}], [0.6660642546333382, 0.8011064455181076, 0.7093925636591724, 0.6505114518061738, 0.6976389675341924]]},
"data": {"coords": {"iter": {"dims": ["iter"], "attrs": {}, "data": [0, 1, 2, 3, 4, 5, 6, 7, 8, 9, 10, 11, 12, 13, 14, 15, 16, 17, 18, 19]}, "suggestion": {"dims": ["suggestion"], "attrs": {}, "data": [0]}}, "attrs": {}, "dims": {"iter": 20, "suggestion": 1}, "data_vars": {"alpha": {"dims": ["iter", "suggestion"], "attrs": {}, "data": [[0.33849298138177286], [0.0011700386655122464], [0.04713786751618692], [0.00460369144328648], [7.713221521865067e-05], [0.48592513893305705], [2.468497824934411], [9.00351182654576e-05], [1.060451841767999], [0.19700366887945106], [0.44726555307201105], [0.01423084105009155], [0.006393079887083945], [4.3520897179251407e-05], [0.009072317467409559], [2.7267398091018776e-05], [0.00014614372027226075], [1.5496018089086376e-05], [0.03167512235401704], [2.8853988470726718e-05]]}, "batch_size": {"dims": ["iter", "suggestion"], "attrs": {}, "data": [[149], [214], [66], [130], [60], [12], [34], [180], [216], [207], [244], [50], [152], [160], [161], [128], [176], [149], [65], [227]]}, "beta_1": {"dims": ["iter", "suggestion"], "attrs": {}, "data": [[0.9817631653438093], [0.6761815612402344], [0.9835970290257515], [0.9846401732042835], [0.619464062318344], [0.9528273011218004], [0.8543417925497657], [0.9830275903166786], [0.9731378539906055], [0.7206949426046291], [0.933846052379102], [0.9401281668888963], [0.7576125072878764], [0.82921558324639], [0.5473992577256312], [0.7911420721949863], [0.9178057253844639], [0.6196898544287314], [0.8765997168647983], [0.9787853137372765]]}, "beta_2": {"dims": ["iter", "suggestion"], "attrs": {}, "data": [[0.9999720700454418], [0.9769845580222275], [0.9961574397870797], [0.9748409278820048], [0.9999865338403165], [0.999406065614406], [0.999989703891845], [0.915428428832061], [0.9999793959450997], [0.999896396384871], [0.9998723039228294], [0.9954769253984499], [0.9999923284984898], [0.942459101648014], [0.9999959660006594], [0.9999975402745069], [0.9999793162865129], [0.9928981146698443], [0.9951255274025214], [0.9417769052228359]]}, "epsilon": {"dims": ["iter", "suggestion"], "attrs": {}, "data": [[1.6714698115965691e-07], [1.0327966620303088e-09], [5.128770081907777e-07], [7.591697552239052e-09], [1.7061571407674678e-08], [5.285495229038383e-08], [2.6108101700000952e-08], [3.5866617061988727e-09], [1.9350479508468562e-07], [1.7572329205982277e-09], [5.216705840696782e-07], [2.8925270282614965e-07], [3.273276805205656e-08], [5.153291148822951e-09], [1.2997199549904727e-08], [3.9840870564500457e-07], [6.113459266930893e-08], [2.218584543565221e-08], [1.0370428800084945e-08], [7.489659940349083e-07]]}, "hidden_layer_sizes": {"dims": ["iter", "suggestion"], "attrs": {}, "data": [[153], [163], [98], [135], [177], [122], [82], [125], [67], [117], [114], [192], [97], [90], [91], [62], [118], [107], [172], [70]]}, "learning_rate_init": {"dims": ["iter", "suggestion"], "attrs": {}, "data": [[0.0008624524597847152], [2.6817633744271533e-05], [0.027069355565222126], [0.0375438135415259], [0.009664976571039565], [0.028521232595799455], [0.007039915496731568], [0.00027509085860318776], [5.4325449581540405e-05], [4.996142479243435e-05], [0.06991853647622578], [1.62372581849352e-05], [0.03065796964850667], [0.043557693340193014], [0.0910640829539056], [0.000131004305654691], [0.007501651601248401], [3.6073608084556915e-05], [0.0036369941905922028], [0.0007233645105183558]]}, "tol": {"dims": ["iter", "suggestion"], "attrs": {}, "data": [[1.3103375844199077e-05], [0.0002918330213036228], [2.149131535686556e-05], [0.0008906912063078777], [2.6797464081089378e-05], [0.00022861581751421422], [0.00031830886865270223], [0.0006933625172460606], [0.03908393422848343], [0.0001792698525032421], [0.0022674824096066077], [0.002546906303812749], [0.0006146172245026669], [0.0005801752962241045], [0.032741170612293355], [2.264874891647315e-05], [0.0004371979015832064], [5.598326740028448e-05], [0.00017823992915042618], [0.0006458304810491205]]}, "validation_fraction": {"dims": ["iter", "suggestion"], "attrs": {}, "data": [[0.8061006701279344], [0.5097435278938344], [0.8119639225919726], [0.4843699578266756], [0.11202555926667013], [0.13437127524570616], [0.2961601856133996], [0.8063605869611372], [0.33990728672105514], [0.5640157546599558], [0.7045068173220734], [0.4060101015082757], [0.31810932185542207], [0.5008919438287244], [0.8937813401761575], [0.8256531232720133], [0.36182881356976665], [0.7111991192970499], [0.7572182560328444], [0.21161480344434103]]}}}}
