# Supplementary material
Source: ML conference proceedings conference paper supplement (https://proceedings.neurips.cc/paper_files/paper/2022/hash/31a57804448363bcab777f818f75f5b4-Abstract.html)
Supplement: Supplementary file 1 [file 31a57804448363bcab777f818f75f5b4-Supplemental-Conference.zip › trading_off_resource_budgets_f-Supplementary Material/code_and_data/experiments/base_results/bo_20220228_124924_b7rkpeqg/suggest_log/0004d0ad96ac5dd7972a2c4ace4ce8a5.json]

{"meta": {"args": {"--uuid": "0004d0ad96ac5dd7972a2c4ace4ce8a5", "-db-root": "/home/damon_falck/blackboxbandits/experiments/saved_results", "--opt-root": "/home/damon_falck/blackboxbandits/experiments", "--data-root": "/home/damon_falck/blackboxbandits/experiments/penn_datasets", "--db": "bo_20220228_124924_b7rkpeqg", "--opt": "RandomSearch", "--data": "clf-analcatdata-cyyoung8092", "--classifier": "lasso", "--metric": "nll", "--calls": 20, "--suggestions": 1, "--jobs-file": null, "--verbose": false, "dry_run": false, "rev": "bd14afd", "opt_rev": "0.0.8"}, "signature": [[{"C": 1.5676677195506077, "intercept_scaling": 7.257005721594282}, {"C": 2.57663857461359, "intercept_scaling": 1.5119336467641016}, {"C": 0.49501595537331966, "intercept_scaling": 3.833332156156665}, {"C": 0.5627932047415171, "intercept_scaling": 36.905577292137636}, {"C": 71.55682161754872, "intercept_scaling": 0.34179529120610125}], [0.30963443703288857, 0.32169544700989566, 0.3115466696259948, 0.2966203416134016, 0.8119181489712032]]},
"data": {"coords": {"iter": {"dims": ["iter"], "attrs": {}, "data": [0, 1, 2, 3, 4, 5, 6, 7, 8, 9, 10, 11, 12, 13, 14, 15, 16, 17, 18, 19]}, "suggestion": {"dims": ["suggestion"], "attrs": {}, "data": [0]}}, "attrs": {}, "dims": {"iter": 20, "suggestion": 1}, "data_vars": {"C": {"dims": ["iter", "suggestion"], "attrs": {}, "data": [[76.54408389953426], [2.2728995725840413], [18.610562527340026], [0.07609509689614952], [0.06977784303485468], [10.104762046515393], [4.583848455658227], [14.345251168859253], [16.719880415016632], [27.019749718002256], [1.1344032122606325], [0.17444153259771342], [6.045140533103889], [8.767892110322117], [0.09239611766318159], [0.1352052147715831], [0.015384532396669282], [0.05570571657331008], [0.014763892463997492], [2.7654469841728324]]}, "intercept_scaling": {"dims": ["iter", "suggestion"], "attrs": {}, "data": [[28.50076681962625], [12.242568757259045], [0.24404492348579618], [0.014328732857874317], [0.09929016497700241], [0.9052367229790725], [18.63611377318508], [0.07448416770385459], [38.50818925448639], [1.0943280362430479], [27.87468125352179], [5.068412628626993], [0.050058899459548487], [26.562916804796306], [0.35059174004356963], [7.16923608299262], [0.0868309319456092], [19.278932878699997], [0.010782379598666547], [4.7668639697373285]]}}}}
