# Supplementary material
Source: ML conference proceedings conference paper supplement (https://proceedings.neurips.cc/paper_files/paper/2022/hash/31a57804448363bcab777f818f75f5b4-Abstract.html)
Supplement: Supplementary file 1 [file 31a57804448363bcab777f818f75f5b4-Supplemental-Conference.zip › trading_off_resource_budgets_f-Supplementary Material/code_and_data/experiments/base_results/bo_20220228_124924_b7rkpeqg/suggest_log/05b9d29426385a87b79704b1bcb35f16.json]

{"meta": {"args": {"--uuid": "05b9d29426385a87b79704b1bcb35f16", "-db-root": "/home/damon_falck/blackboxbandits/experiments/saved_results", "--opt-root": "/home/damon_falck/blackboxbandits/experiments", "--data-root": "/home/damon_falck/blackboxbandits/experiments/penn_datasets", "--db": "bo_20220228_124924_b7rkpeqg", "--opt": "OpenTuner-BanditA", "--data": "clf-hungarian", "--classifier": "MLP-adam", "--metric": "nll", "--calls": 20, "--suggestions": 1, "--jobs-file": null, "--verbose": false, "dry_run": false, "rev": "bd14afd", "opt_rev": "0.8.7"}, "signature": [[{"alpha": 0.019628224813442792, "batch_size": 182, "beta_1": 0.9410202200271762, "beta_2": 0.9998021557676793, "epsilon": 1.8662266976518e-08, "hidden_layer_sizes": 147, "learning_rate_init": 0.0005627932047415167, "tol": 0.03690557729213761, "validation_fraction": 0.8846827852548593}, {"alpha": 0.001998246739232944, "batch_size": 200, "beta_1": 0.919111482530466, "beta_2": 0.9998488260436156, "epsilon": 5.981221901152555e-07, "hidden_layer_sizes": 61, "learning_rate_init": 2.2310905607443014e-05, "tol": 1.2046852412030316e-05, "validation_fraction": 0.8117896445826539}, {"alpha": 0.46659545670218433, "batch_size": 219, "beta_1": 0.9889789783750891, "beta_2": 0.9999896868093284, "epsilon": 2.4234724484675948e-08, "hidden_layer_sizes": 167, "learning_rate_init": 2.972334644335654e-05, "tol": 0.0036281404040243792, "validation_fraction": 0.17260651658522078}, {"alpha": 4.656005689076002, "batch_size": 135, "beta_1": 0.870503881627747, "beta_2": 0.9948873266941017, "epsilon": 2.1023308743480125e-07, "hidden_layer_sizes": 118, "learning_rate_init": 0.001878173875716191, "tol": 1.1889379831773006e-05, "validation_fraction": 0.6264327093752792}, {"alpha": 0.04705159350400542, "batch_size": 158, "beta_1": 0.9870884262730957, "beta_2": 0.9999596874382349, "epsilon": 1.1981845126013875e-08, "hidden_layer_sizes": 116, "learning_rate_init": 0.006173405204074311, "tol": 1.7414134181586194e-05, "validation_fraction": 0.6754299026638921}], [0.5700253533390459, 0.6810009583630385, 0.7031230969029376, 0.4802758082304794, 0.4645389318289376]]},
"data": {"coords": {"iter": {"dims": ["iter"], "attrs": {}, "data": [0, 1, 2, 3, 4, 5, 6, 7, 8, 9, 10, 11, 12, 13, 14, 15, 16, 17, 18, 19]}, "suggestion": {"dims": ["suggestion"], "attrs": {}, "data": [0]}}, "attrs": {}, "dims": {"iter": 20, "suggestion": 1}, "data_vars": {"alpha": {"dims": ["iter", "suggestion"], "attrs": {}, "data": [[0.6616190856098959], [7.868956055723059], [8.574752961763759], [9.12460764820334], [0.08796056495060915], [7.868956055723059], [7.868956055723059], [7.868956055723059], [7.868956055723059], [7.868956055723059], [7.868956055723059], [7.868956055723059], [1.2402618650228154], [7.868956055723059], [1.9190075492049758], [7.868956055723059], [3.5925141098842146], [7.869662406133109], [7.869662406133109], [9.524201981200195]]}, "batch_size": {"dims": ["iter", "suggestion"], "attrs": {}, "data": [[239], [66], [66], [39], [186], [66], [66], [104], [66], [209], [209], [209], [209], [24], [209], [209], [226], [229], [229], [229]]}, "beta_1": {"dims": ["iter", "suggestion"], "attrs": {}, "data": [[0.9402515774654667], [0.8427767678793131], [0.8584684248317077], [0.6379326954482011], [0.7905453423509244], [0.8427767678793131], [0.8427767678793131], [0.8427767678793131], [0.8427767678793131], [0.8427767678793131], [0.8427767678793131], [0.5155920282628582], [0.9550546072530463], [0.8427767678793131], [0.8427767678793131], [0.8427767678793131], [0.6258574153829761], [0.5018507032577598], [0.8815321434106098], [0.5018507032577598]]}, "beta_2": {"dims": ["iter", "suggestion"], "attrs": {}, "data": [[0.9646665708136024], [0.9732082972788649], [0.9732082972788649], [0.9340305639496921], [0.9825908834389799], [0.9732082972788649], [0.9732082972788649], [0.9732082972788649], [0.9732082972788649], [0.9732082972788649], [0.9387718745689646], [0.9732082972788649], [0.902646904994586], [0.9732082972788649], [0.9732082972788649], [0.9732082972788649], [0.9790570346064909], [0.9732082972788649], [0.9732082972788649], [0.9732082972788649]]}, "epsilon": {"dims": ["iter", "suggestion"], "attrs": {}, "data": [[2.294781452921436e-07], [3.9635034426434e-09], [3.9635034426434e-09], [4.0790179595655675e-08], [5.217194186951369e-07], [3.055482901420371e-07], [3.055482901420371e-07], [3.055482901420371e-07], [3.055482901420371e-07], [3.055482901420371e-07], [3.055482901420371e-07], [9.903108940950413e-07], [6.788633756532315e-07], [3.055482901420371e-07], [3.055482901420371e-07], [3.055482901420371e-07], [8.376473336351987e-07], [3.055482901420371e-07], [3.055482901420371e-07], [9.577873713312026e-07]]}, "hidden_layer_sizes": {"dims": ["iter", "suggestion"], "attrs": {}, "data": [[116], [83], [83], [70], [110], [83], [83], [83], [83], [83], [83], [83], [88], [83], [83], [83], [86], [83], [83], [83]]}, "learning_rate_init": {"dims": ["iter", "suggestion"], "attrs": {}, "data": [[0.048990819065241435], [0.04006099380587507], [0.04006099380587507], [0.027488779212848136], [0.006558925732878352], [0.07221511224279668], [0.07221511224279668], [0.07221511224279668], [0.07221511224279668], [0.08505016518366053], [0.08505016518366053], [0.08505016518366053], [0.04928561198293873], [0.08505016518366053], [0.08505016518366053], [0.07379443382450239], [0.07216381378218732], [0.08505016518366053], [0.08505016518366053], [0.08505016518366053]]}, "tol": {"dims": ["iter", "suggestion"], "attrs": {}, "data": [[0.07383852429019615], [0.04708823438864134], [0.04708823438864134], [0.08313144910558183], [0.08406473774975358], [0.04708823438864134], [0.026692662789024425], [0.026692662789024425], [0.026692662789024425], [0.026692662789024425], [0.09063680428357539], [0.026692662789024425], [0.08170247996252426], [0.02793367248609473], [0.026692662789024425], [0.026692662789024425], [0.09140753645966908], [0.026692662789024425], [0.026692662789024425], [0.026692662789024425]]}, "validation_fraction": {"dims": ["iter", "suggestion"], "attrs": {}, "data": [[0.3900853591035166], [0.5626332632327987], [0.6298674831237971], [0.5280973282939775], [0.4043914320609131], [0.5626332632327987], [0.5626332632327987], [0.5626332632327987], [0.63549306691733], [0.5626332632327987], [0.5626332632327987], [0.5626332632327987], [0.806235149196774], [0.5626332632327987], [0.8287505491026369], [0.5626332632327987], [0.29245147257365234], [0.5626332632327987], [0.32043829861749085], [0.5626332632327987]]}}}}
