# Supplementary material
Source: ML conference proceedings conference paper supplement (https://proceedings.neurips.cc/paper_files/paper/2022/hash/31a57804448363bcab777f818f75f5b4-Abstract.html)
Supplement: Supplementary file 1 [file 31a57804448363bcab777f818f75f5b4-Supplemental-Conference.zip › trading_off_resource_budgets_f-Supplementary Material/code_and_data/experiments/base_results/bo_20220228_124924_b7rkpeqg/suggest_log/05dbf8bee83552528a14beec8113cc84.json]

{"meta": {"args": {"--uuid": "05dbf8bee83552528a14beec8113cc84", "-db-root": "/home/damon_falck/blackboxbandits/experiments/saved_results", "--opt-root": "/home/damon_falck/blackboxbandits/experiments", "--data-root": "/home/damon_falck/blackboxbandits/experiments/penn_datasets", "--db": "bo_20220228_124924_b7rkpeqg", "--opt": "PySOT", "--data": "clf-allrep", "--classifier": "lasso", "--metric": "nll", "--calls": 20, "--suggestions": 1, "--jobs-file": null, "--verbose": false, "dry_run": false, "rev": "bd14afd", "opt_rev": "0.3.3"}, "signature": [[{"C": 1.5676677195506077, "intercept_scaling": 7.257005721594282}, {"C": 2.57663857461359, "intercept_scaling": 1.5119336467641016}, {"C": 0.49501595537331966, "intercept_scaling": 3.833332156156665}, {"C": 0.5627932047415171, "intercept_scaling": 36.905577292137636}, {"C": 71.55682161754872, "intercept_scaling": 0.34179529120610125}], [0.12533642168002496, 0.1273935391678564, 0.11682120417132295, 0.11787462028894306, 0.1880393871227425]]},
"data": {"coords": {"iter": {"dims": ["iter"], "attrs": {}, "data": [0, 1, 2, 3, 4, 5, 6, 7, 8, 9, 10, 11, 12, 13, 14, 15, 16, 17, 18, 19]}, "suggestion": {"dims": ["suggestion"], "attrs": {}, "data": [0]}}, "attrs": {}, "dims": {"iter": 20, "suggestion": 1}, "data_vars": {"C": {"dims": ["iter", "suggestion"], "attrs": {}, "data": [[100.0], [15.848931924611165], [2.5118864315095815], [0.3981071705534977], [0.06309573444801937], [0.010000000000000005], [0.014965125034453398], [2.229721911164894], [0.2095728718791167], [0.3697234846239531], [0.487893592571614], [2.4700123284960034], [0.6059109421639762], [1.5506537407638752], [0.0757618923704627], [9.587479278894817], [0.2310982209044299], [0.27219209842196135], [0.3155967181798758], [0.7012527470026634]]}, "intercept_scaling": {"dims": ["iter", "suggestion"], "attrs": {}, "data": [[0.3981071705534977], [15.848931924611165], [0.010000000000000005], [100.0], [0.06309573444801937], [2.5118864315095815], [72.41289849229425], [76.3164469724309], [92.6050335059295], [90.67622157832456], [2.264234944260091], [0.22277191667000812], [15.512203777920426], [1.386115427388921], [14.730897354977644], [0.6227310648873843], [8.365675684587668], [27.652530318667033], [0.33607395845313753], [0.6809298416607068]]}}}}
