# Supplementary material
Source: ML conference proceedings conference paper supplement (https://proceedings.neurips.cc/paper_files/paper/2022/hash/31a57804448363bcab777f818f75f5b4-Abstract.html)
Supplement: Supplementary file 1 [file 31a57804448363bcab777f818f75f5b4-Supplemental-Conference.zip › trading_off_resource_budgets_f-Supplementary Material/code_and_data/experiments/base_results/bo_20220228_124924_b7rkpeqg/suggest_log/06b54d63c2f15d329f260d2c4728f9de.json]

{"meta": {"args": {"--uuid": "06b54d63c2f15d329f260d2c4728f9de", "-db-root": "/home/damon_falck/blackboxbandits/experiments/saved_results", "--opt-root": "/home/damon_falck/blackboxbandits/experiments", "--data-root": "/home/damon_falck/blackboxbandits/experiments/penn_datasets", "--db": "bo_20220228_124924_b7rkpeqg", "--opt": "Scikit-GP-Hedge", "--data": "clf-churn", "--classifier": "lasso", "--metric": "nll", "--calls": 20, "--suggestions": 1, "--jobs-file": null, "--verbose": false, "dry_run": false, "rev": "bd14afd", "opt_rev": "0.9.0"}, "signature": [[{"C": 1.5676677195506077, "intercept_scaling": 7.257005721594282}, {"C": 2.57663857461359, "intercept_scaling": 1.5119336467641016}, {"C": 0.49501595537331966, "intercept_scaling": 3.833332156156665}, {"C": 0.5627932047415171, "intercept_scaling": 36.905577292137636}, {"C": 71.55682161754872, "intercept_scaling": 0.34179529120610125}], [0.387792816418138, 0.4286565476477741, 0.3241481886040346, 0.3275552707695225, 0.7856312023312286]]},
"data": {"coords": {"iter": {"dims": ["iter"], "attrs": {}, "data": [0, 1, 2, 3, 4, 5, 6, 7, 8, 9, 10, 11, 12, 13, 14, 15, 16, 17, 18, 19]}, "suggestion": {"dims": ["suggestion"], "attrs": {}, "data": [0]}}, "attrs": {}, "dims": {"iter": 20, "suggestion": 1}, "data_vars": {"C": {"dims": ["iter", "suggestion"], "attrs": {}, "data": [[3.743740210420281], [0.43390479799258], [0.6284121431365093], [62.7524573465523], [0.16981985596049112], [0.01], [0.04754810966418231], [0.20704190457270863], [0.22536035572590127], [0.32269926288606626], [0.102804529123475], [0.02801880516596301], [0.29988810532982974], [8.811264122707996], [0.25524442894551624], [0.6982180865881908], [0.08236315404134156], [0.024784595826684026], [0.15850365314569775], [0.05962572052145143]]}, "intercept_scaling": {"dims": ["iter", "suggestion"], "attrs": {}, "data": [[12.243458792074522], [6.420232300405289], [0.02701432123969397], [96.92412119805626], [2.093293909842961], [100.0], [100.0], [100.0], [0.01], [100.0], [100.0], [0.010887473479382938], [0.319104419427677], [0.010247101481699232], [6.982530330240225], [100.0], [8.548603225335556], [18.12547360178346], [0.17288023724158352], [1.412088368697756]]}}}}
