# Supplementary material
Source: ML conference proceedings conference paper supplement (https://proceedings.neurips.cc/paper_files/paper/2022/hash/31a57804448363bcab777f818f75f5b4-Abstract.html)
Supplement: Supplementary file 1 [file 31a57804448363bcab777f818f75f5b4-Supplemental-Conference.zip › trading_off_resource_budgets_f-Supplementary Material/code_and_data/experiments/base_results/bo_20220228_124924_b7rkpeqg/suggest_log/006b9346157e5001bbe5e5cf94ac2911.json]

{"meta": {"args": {"--uuid": "006b9346157e5001bbe5e5cf94ac2911", "-db-root": "/home/damon_falck/blackboxbandits/experiments/saved_results", "--opt-root": "/home/damon_falck/blackboxbandits/experiments", "--data-root": "/home/damon_falck/blackboxbandits/experiments/penn_datasets", "--db": "bo_20220228_124924_b7rkpeqg", "--opt": "OpenTuner-GA", "--data": "reg-634-fri-c2-100-10", "--classifier": "MLP-adam", "--metric": "mse", "--calls": 20, "--suggestions": 1, "--jobs-file": null, "--verbose": false, "dry_run": false, "rev": "bd14afd", "opt_rev": "0.8.7"}, "signature": [[{"alpha": 0.019628224813442792, "batch_size": 182, "beta_1": 0.9410202200271762, "beta_2": 0.9998021557676793, "epsilon": 1.8662266976518e-08, "hidden_layer_sizes": 147, "learning_rate_init": 0.0005627932047415167, "tol": 0.03690557729213761, "validation_fraction": 0.8846827852548593}, {"alpha": 0.001998246739232944, "batch_size": 200, "beta_1": 0.919111482530466, "beta_2": 0.9998488260436156, "epsilon": 5.981221901152555e-07, "hidden_layer_sizes": 61, "learning_rate_init": 2.2310905607443014e-05, "tol": 1.2046852412030316e-05, "validation_fraction": 0.8117896445826539}, {"alpha": 0.46659545670218433, "batch_size": 219, "beta_1": 0.9889789783750891, "beta_2": 0.9999896868093284, "epsilon": 2.4234724484675948e-08, "hidden_layer_sizes": 167, "learning_rate_init": 2.972334644335654e-05, "tol": 0.0036281404040243792, "validation_fraction": 0.17260651658522078}, {"alpha": 4.656005689076002, "batch_size": 135, "beta_1": 0.870503881627747, "beta_2": 0.9948873266941017, "epsilon": 2.1023308743480125e-07, "hidden_layer_sizes": 118, "learning_rate_init": 0.001878173875716191, "tol": 1.1889379831773006e-05, "validation_fraction": 0.6264327093752792}, {"alpha": 0.04705159350400542, "batch_size": 158, "beta_1": 0.9870884262730957, "beta_2": 0.9999596874382349, "epsilon": 1.1981845126013875e-08, "hidden_layer_sizes": 116, "learning_rate_init": 0.006173405204074311, "tol": 1.7414134181586194e-05, "validation_fraction": 0.6754299026638921}], [0.8955568215763824, 0.9663095069022317, 1.0633485767815807, 0.726818113455513, 0.7031763556433641]]},
"data": {"coords": {"iter": {"dims": ["iter"], "attrs": {}, "data": [0, 1, 2, 3, 4, 5, 6, 7, 8, 9, 10, 11, 12, 13, 14, 15, 16, 17, 18, 19]}, "suggestion": {"dims": ["suggestion"], "attrs": {}, "data": [0]}}, "attrs": {}, "dims": {"iter": 20, "suggestion": 1}, "data_vars": {"alpha": {"dims": ["iter", "suggestion"], "attrs": {}, "data": [[4.208918678127545], [8.746875641654038], [4.208918678127545], [4.208918678127545], [7.514631692549937], [2.1328567395758102], [7.1807505105367895], [7.1807505105367895], [7.1807505105367895], [3.254707769357918], [1.1757310679365678], [2.268784420607675], [7.1807505105367895], [7.1807505105367895], [7.1807505105367895], [3.1653573665736032], [7.1807505105367895], [7.1807505105367895], [7.1807505105367895], [7.1807505105367895]]}, "batch_size": {"dims": ["iter", "suggestion"], "attrs": {}, "data": [[95], [228], [95], [95], [32], [86], [97], [97], [97], [97], [178], [123], [21], [21], [21], [202], [21], [21], [21], [21]]}, "beta_1": {"dims": ["iter", "suggestion"], "attrs": {}, "data": [[0.7599790605995161], [0.5011904437485346], [0.7599790605995161], [0.5792306591585337], [0.9090751456246825], [0.8345538876998675], [0.549209894624715], [0.549209894624715], [0.549209894624715], [0.549209894624715], [0.8385102818912544], [0.9342128277811141], [0.549209894624715], [0.549209894624715], [0.549209894624715], [0.9595188019011711], [0.549209894624715], [0.7498727781287484], [0.5333771465147024], [0.549209894624715]]}, "beta_2": {"dims": ["iter", "suggestion"], "attrs": {}, "data": [[0.9623603556986253], [0.9197423382744963], [0.9623603556986253], [0.9623603556986253], [0.9347366195645631], [0.9852991924718205], [0.9991508078669147], [0.9991508078669147], [0.9991508078669147], [0.9991508078669147], [0.9908486928693288], [0.9594129912121989], [0.9991508078669147], [0.9991508078669147], [0.9569604212628898], [0.9113216381648888], [0.9991508078669147], [0.9991508078669147], [0.9991508078669147], [0.9991508078669147]]}, "epsilon": {"dims": ["iter", "suggestion"], "attrs": {}, "data": [[8.823293004283906e-07], [2.818017685040909e-07], [9.213429989224076e-07], [8.823293004283906e-07], [6.755497884708129e-07], [6.766833346166502e-07], [2.1208983339068743e-07], [2.1208983339068743e-07], [2.1208983339068743e-07], [2.1208983339068743e-07], [1.3158577219560163e-07], [4.056043908800812e-07], [2.1208983339068743e-07], [2.1208983339068743e-07], [2.1208983339068743e-07], [2.1348055959155465e-07], [2.1208983339068743e-07], [2.1208983339068743e-07], [2.1208983339068743e-07], [9.074730437380319e-07]]}, "hidden_layer_sizes": {"dims": ["iter", "suggestion"], "attrs": {}, "data": [[111], [114], [111], [154], [196], [68], [199], [199], [199], [199], [71], [145], [199], [199], [199], [127], [199], [199], [199], [199]]}, "learning_rate_init": {"dims": ["iter", "suggestion"], "attrs": {}, "data": [[0.005082345844179038], [0.055354501303941754], [0.005082345844179038], [0.005082345844179038], [0.08422548207637696], [0.028586329065575167], [0.04844261630275375], [0.019567770071300995], [0.005867216267127318], [0.04844261630275375], [0.07858864262101865], [0.09027079545870002], [0.04844261630275375], [0.04844261630275375], [0.04844261630275375], [0.05642709619302282], [0.04844261630275375], [0.04844261630275375], [0.04844261630275375], [0.04844261630275375]]}, "tol": {"dims": ["iter", "suggestion"], "attrs": {}, "data": [[0.019132889577954493], [0.06648842692177863], [0.019132889577954493], [0.019132889577954493], [0.011255476602612436], [0.010994401961295464], [0.010768279859447883], [0.010768279859447883], [0.010768279859447883], [0.010768279859447883], [0.0720489074689356], [0.06796267075396571], [0.010768279859447883], [0.04506442894336787], [0.010768279859447883], [0.07245429476491576], [0.010768279859447883], [0.010768279859447883], [0.010768279859447883], [0.010768279859447883]]}, "validation_fraction": {"dims": ["iter", "suggestion"], "attrs": {}, "data": [[0.2076661721925322], [0.7953541803104747], [0.2076661721925322], [0.2076661721925322], [0.7567711607592097], [0.3506003824102212], [0.4710370060963507], [0.4710370060963507], [0.4710370060963507], [0.4710370060963507], [0.39847102296197145], [0.4000551944396402], [0.4710370060963507], [0.4710370060963507], [0.4710370060963507], [0.566648556391424], [0.4566454239959783], [0.4566454239959783], [0.4566454239959783], [0.4566454239959783]]}}}}
