# Supplementary material
Source: ML conference proceedings conference paper supplement (https://proceedings.neurips.cc/paper_files/paper/2022/hash/31a57804448363bcab777f818f75f5b4-Abstract.html)
Supplement: Supplementary file 1 [file 31a57804448363bcab777f818f75f5b4-Supplemental-Conference.zip › trading_off_resource_budgets_f-Supplementary Material/code_and_data/experiments/base_results/bo_20220228_124924_b7rkpeqg/suggest_log/06c5f7a55b8f5601b97463e7be443ca7.json]

{"meta": {"args": {"--uuid": "06c5f7a55b8f5601b97463e7be443ca7", "-db-root": "/home/damon_falck/blackboxbandits/experiments/saved_results", "--opt-root": "/home/damon_falck/blackboxbandits/experiments", "--data-root": "/home/damon_falck/blackboxbandits/experiments/penn_datasets", "--db": "bo_20220228_124924_b7rkpeqg", "--opt": "OpenTuner-GA", "--data": "reg-611-fri-c3-100-5", "--classifier": "lasso", "--metric": "mse", "--calls": 20, "--suggestions": 1, "--jobs-file": null, "--verbose": false, "dry_run": false, "rev": "bd14afd", "opt_rev": "0.8.7"}, "signature": [[{"alpha": 1.5676677195506077, "fit_intercept": true, "max_iter": 423, "normalize": true, "positive": false, "tol": 0.0038333321561566623}, {"alpha": 0.5627932047415171, "fit_intercept": true, "max_iter": 3989, "normalize": false, "positive": true, "tol": 0.001304907355036239}, {"alpha": 1.871450068624068, "fit_intercept": true, "max_iter": 16, "normalize": false, "positive": false, "tol": 0.021403233140986057}, {"alpha": 12.960656597279737, "fit_intercept": true, "max_iter": 4378, "normalize": true, "positive": false, "tol": 0.013246974647468445}, {"alpha": 0.029723346443356558, "fit_intercept": true, "max_iter": 24, "normalize": true, "positive": true, "tol": 0.00045566719139214756}], [1.1950210910847765, 1.1371266601772307, 1.1950210910847765, 1.1950210910847765, 0.831684554968807]]},
"data": {"coords": {"iter": {"dims": ["iter"], "attrs": {}, "data": [0, 1, 2, 3, 4, 5, 6, 7, 8, 9, 10, 11, 12, 13, 14, 15, 16, 17, 18, 19]}, "suggestion": {"dims": ["suggestion"], "attrs": {}, "data": [0]}}, "attrs": {}, "dims": {"iter": 20, "suggestion": 1}, "data_vars": {"alpha": {"dims": ["iter", "suggestion"], "attrs": {}, "data": [[0.5422741029595621], [0.5422741029595621], [0.5422741029595621], [48.40407522093535], [48.40407522093535], [50.593038507339045], [0.13328761744200102], [3.0807758463714574], [0.13328761744200102], [0.13328761744200102], [22.233069213341118], [0.13328761744200102], [12.226616749670297], [0.13328761744200102], [1.3102307794523205], [4.9865406032405355], [7.392691832576835], [27.092864915319808], [0.685199975601515], [0.13328761744200102]]}, "fit_intercept": {"dims": ["iter", "suggestion"], "attrs": {}, "data": [[0], [0], [0], [1], [1], [0], [0], [0], [0], [0], [0], [1], [0], [0], [1], [0], [1], [0], [0], [0]]}, "max_iter": {"dims": ["iter", "suggestion"], "attrs": {}, "data": [[686], [686], [686], [12], [12], [33], [10], [11], [10], [10], [113], [10], [10], [10], [274], [10], [852], [186], [10], [34]]}, "normalize": {"dims": ["iter", "suggestion"], "attrs": {}, "data": [[0], [1], [0], [1], [1], [1], [1], [0], [0], [0], [1], [1], [1], [1], [1], [1], [0], [0], [1], [1]]}, "positive": {"dims": ["iter", "suggestion"], "attrs": {}, "data": [[0], [0], [0], [0], [0], [0], [1], [1], [1], [1], [1], [1], [0], [1], [1], [1], [0], [0], [1], [1]]}, "tol": {"dims": ["iter", "suggestion"], "attrs": {}, "data": [[0.018868038404441], [0.018868038404441], [0.038752723306055774], [0.04790898626723255], [0.04790898626723255], [0.09717384374601472], [0.02700908553646324], [0.08977403842262215], [0.02700908553646324], [0.02700908553646324], [0.010609166281942684], [0.02700908553646324], [0.03665977843024775], [0.024853036624126124], [0.00277294575316105], [0.02700908553646324], [0.09245164269918475], [0.0159404751369862], [0.02700908553646324], [0.02700908553646324]]}}}}
