# Supplementary material
Source: ML conference proceedings conference paper supplement (https://proceedings.neurips.cc/paper_files/paper/2022/hash/31a57804448363bcab777f818f75f5b4-Abstract.html)
Supplement: Supplementary file 1 [file 31a57804448363bcab777f818f75f5b4-Supplemental-Conference.zip › trading_off_resource_budgets_f-Supplementary Material/code_and_data/experiments/base_results/bo_20220228_124924_b7rkpeqg/suggest_log/06c4229bd00c5689941d382d119981cf.json]

{"meta": {"args": {"--uuid": "06c4229bd00c5689941d382d119981cf", "-db-root": "/home/damon_falck/blackboxbandits/experiments/saved_results", "--opt-root": "/home/damon_falck/blackboxbandits/experiments", "--data-root": "/home/damon_falck/blackboxbandits/experiments/penn_datasets", "--db": "bo_20220228_124924_b7rkpeqg", "--opt": "HyperOpt", "--data": "reg-542-pollution", "--classifier": "lasso", "--metric": "mse", "--calls": 20, "--suggestions": 1, "--jobs-file": null, "--verbose": false, "dry_run": false, "rev": "bd14afd", "opt_rev": "0.2.7"}, "signature": [[{"alpha": 1.5676677195506077, "fit_intercept": true, "max_iter": 423, "normalize": true, "positive": false, "tol": 0.0038333321561566623}, {"alpha": 0.5627932047415171, "fit_intercept": true, "max_iter": 3989, "normalize": false, "positive": true, "tol": 0.001304907355036239}, {"alpha": 1.871450068624068, "fit_intercept": true, "max_iter": 16, "normalize": false, "positive": false, "tol": 0.021403233140986057}, {"alpha": 12.960656597279737, "fit_intercept": true, "max_iter": 4378, "normalize": true, "positive": false, "tol": 0.013246974647468445}, {"alpha": 0.029723346443356558, "fit_intercept": true, "max_iter": 24, "normalize": true, "positive": true, "tol": 0.00045566719139214756}], [1.2509137901459315, 1.0630875624207263, 1.2509137901459315, 1.2509137901459315, 0.700734037992276]]},
"data": {"coords": {"iter": {"dims": ["iter"], "attrs": {}, "data": [0, 1, 2, 3, 4, 5, 6, 7, 8, 9, 10, 11, 12, 13, 14, 15, 16, 17, 18, 19]}, "suggestion": {"dims": ["suggestion"], "attrs": {}, "data": [0]}}, "attrs": {}, "dims": {"iter": 20, "suggestion": 1}, "data_vars": {"alpha": {"dims": ["iter", "suggestion"], "attrs": {}, "data": [[0.27093375324760166], [4.268176733625999], [1.0796928889438697], [0.013946811187316737], [4.025062032295792], [60.33153081787959], [93.28835578200717], [0.23144227768541673], [0.04978831216999317], [5.189284684837554], [0.541883250063051], [54.7225455796363], [13.229683938349938], [1.4658695743223649], [3.075845441843915], [3.4446992266059637], [0.02450065221058491], [0.020888594222507103], [0.5875799564649343], [1.3999287263727913]]}, "fit_intercept": {"dims": ["iter", "suggestion"], "attrs": {}, "data": [[true], [true], [true], [false], [true], [true], [false], [true], [false], [true], [true], [false], [false], [false], [false], [true], [true], [true], [false], [true]]}, "max_iter": {"dims": ["iter", "suggestion"], "attrs": {}, "data": [[416], [521], [198], [19], [2510], [12], [21], [322], [27], [4712], [90], [388], [125], [801], [43], [2760], [19], [39], [2204], [24]]}, "normalize": {"dims": ["iter", "suggestion"], "attrs": {}, "data": [[true], [false], [true], [true], [false], [true], [false], [true], [false], [true], [false], [true], [true], [false], [true], [false], [true], [true], [true], [true]]}, "positive": {"dims": ["iter", "suggestion"], "attrs": {}, "data": [[true], [true], [true], [false], [false], [true], [false], [true], [true], [false], [false], [false], [true], [true], [false], [true], [true], [true], [true], [false]]}, "tol": {"dims": ["iter", "suggestion"], "attrs": {}, "data": [[1.6628792826647745e-05], [0.0002740290595256256], [0.003598189262239895], [0.03540559541173867], [0.0011746759037246932], [0.013520751512120309], [0.0022205865520312598], [1.1737452869923683e-05], [2.442379073911551e-05], [0.0038041318879004997], [0.0004938278334786168], [0.0017266574368587178], [0.001492837789327809], [0.00017993558221334206], [0.0023196291943337146], [0.003053141839394027], [8.61794089156277e-05], [1.5461921513946964e-05], [0.000736012101959542], [0.002174547539317094]]}}}}
