# Supplementary material
Source: ML conference proceedings conference paper supplement (https://proceedings.neurips.cc/paper_files/paper/2022/hash/31a57804448363bcab777f818f75f5b4-Abstract.html)
Supplement: Supplementary file 1 [file 31a57804448363bcab777f818f75f5b4-Supplemental-Conference.zip › trading_off_resource_budgets_f-Supplementary Material/code_and_data/experiments/base_results/bo_20220228_124924_b7rkpeqg/suggest_log/06df07d09c255ceea6092da3b8e46a37.json]

{"meta": {"args": {"--uuid": "06df07d09c255ceea6092da3b8e46a37", "-db-root": "/home/damon_falck/blackboxbandits/experiments/saved_results", "--opt-root": "/home/damon_falck/blackboxbandits/experiments", "--data-root": "/home/damon_falck/blackboxbandits/experiments/penn_datasets", "--db": "bo_20220228_124924_b7rkpeqg", "--opt": "HyperOpt", "--data": "reg-529-pollen", "--classifier": "lasso", "--metric": "mse", "--calls": 20, "--suggestions": 1, "--jobs-file": null, "--verbose": false, "dry_run": false, "rev": "bd14afd", "opt_rev": "0.2.7"}, "signature": [[{"alpha": 1.5676677195506077, "fit_intercept": true, "max_iter": 423, "normalize": true, "positive": false, "tol": 0.0038333321561566623}, {"alpha": 0.5627932047415171, "fit_intercept": true, "max_iter": 3989, "normalize": false, "positive": true, "tol": 0.001304907355036239}, {"alpha": 1.871450068624068, "fit_intercept": true, "max_iter": 16, "normalize": false, "positive": false, "tol": 0.021403233140986057}, {"alpha": 12.960656597279737, "fit_intercept": true, "max_iter": 4378, "normalize": true, "positive": false, "tol": 0.013246974647468445}, {"alpha": 0.029723346443356558, "fit_intercept": true, "max_iter": 24, "normalize": true, "positive": true, "tol": 0.00045566719139214756}], [0.9899502579925157, 0.9899502579925157, 0.9899502579925157, 0.9899502579925157, 0.9899502579925157]]},
"data": {"coords": {"iter": {"dims": ["iter"], "attrs": {}, "data": [0, 1, 2, 3, 4, 5, 6, 7, 8, 9, 10, 11, 12, 13, 14, 15, 16, 17, 18, 19]}, "suggestion": {"dims": ["suggestion"], "attrs": {}, "data": [0]}}, "attrs": {}, "dims": {"iter": 20, "suggestion": 1}, "data_vars": {"alpha": {"dims": ["iter", "suggestion"], "attrs": {}, "data": [[5.28888241658011], [0.2778001931807276], [0.016801685727172604], [0.4061804439351535], [0.015352387133523628], [69.4574187867183], [0.03397529771732089], [13.551964111759684], [4.076083609121303], [74.72762375833088], [2.3519277331273845], [1.6058581559073855], [0.01983681910588965], [72.2624343780125], [62.45833352655546], [0.1991594218128746], [0.0229599416387168], [15.464920517502291], [20.341875753343043], [0.23511256569375627]]}, "fit_intercept": {"dims": ["iter", "suggestion"], "attrs": {}, "data": [[false], [true], [true], [false], [true], [true], [true], [true], [true], [true], [false], [true], [false], [true], [false], [true], [true], [true], [false], [true]]}, "max_iter": {"dims": ["iter", "suggestion"], "attrs": {}, "data": [[4637], [34], [223], [419], [21], [21], [269], [123], [79], [75], [300], [339], [3827], [38], [24], [190], [543], [231], [55], [1025]]}, "normalize": {"dims": ["iter", "suggestion"], "attrs": {}, "data": [[false], [true], [false], [false], [false], [true], [false], [true], [false], [false], [false], [true], [false], [true], [true], [false], [false], [true], [true], [true]]}, "positive": {"dims": ["iter", "suggestion"], "attrs": {}, "data": [[true], [false], [true], [false], [false], [false], [false], [true], [true], [false], [true], [true], [true], [false], [false], [false], [true], [true], [true], [true]]}, "tol": {"dims": ["iter", "suggestion"], "attrs": {}, "data": [[0.00017468371586958293], [0.002512716060737438], [1.3169170142486648e-05], [0.00012927746353889804], [0.00010484134280752272], [0.000162848903932951], [0.009063105266364578], [0.005032577629886429], [0.022097229174390203], [2.2631804429025193e-05], [0.0007548825868800659], [0.006886630844510276], [0.023739601691769297], [4.064488264612498e-05], [0.0003384165720637893], [7.858372052897671e-05], [0.0005489231355791238], [4.487865480212786e-05], [0.00014406196996577026], [2.1708356296320263e-05]]}}}}
