# Supplementary material
Source: ML conference proceedings conference paper supplement (https://proceedings.neurips.cc/paper_files/paper/2022/hash/31a57804448363bcab777f818f75f5b4-Abstract.html)
Supplement: Supplementary file 1 [file 31a57804448363bcab777f818f75f5b4-Supplemental-Conference.zip › trading_off_resource_budgets_f-Supplementary Material/code_and_data/experiments/base_results/bo_20220228_124924_b7rkpeqg/suggest_log/06ef2cb08670525e86ad47db4dd06f47.json]

{"meta": {"args": {"--uuid": "06ef2cb08670525e86ad47db4dd06f47", "-db-root": "/home/damon_falck/blackboxbandits/experiments/saved_results", "--opt-root": "/home/damon_falck/blackboxbandits/experiments", "--data-root": "/home/damon_falck/blackboxbandits/experiments/penn_datasets", "--db": "bo_20220228_124924_b7rkpeqg", "--opt": "HyperOpt", "--data": "clf-analcatdata-authorship", "--classifier": "MLP-adam", "--metric": "nll", "--calls": 20, "--suggestions": 1, "--jobs-file": null, "--verbose": false, "dry_run": false, "rev": "bd14afd", "opt_rev": "0.2.7"}, "signature": [[{"alpha": 0.019628224813442792, "batch_size": 182, "beta_1": 0.9410202200271762, "beta_2": 0.9998021557676793, "epsilon": 1.8662266976518e-08, "hidden_layer_sizes": 147, "learning_rate_init": 0.0005627932047415167, "tol": 0.03690557729213761, "validation_fraction": 0.8846827852548593}, {"alpha": 0.001998246739232944, "batch_size": 200, "beta_1": 0.919111482530466, "beta_2": 0.9998488260436156, "epsilon": 5.981221901152555e-07, "hidden_layer_sizes": 61, "learning_rate_init": 2.2310905607443014e-05, "tol": 1.2046852412030316e-05, "validation_fraction": 0.8117896445826539}, {"alpha": 0.46659545670218433, "batch_size": 219, "beta_1": 0.9889789783750891, "beta_2": 0.9999896868093284, "epsilon": 2.4234724484675948e-08, "hidden_layer_sizes": 167, "learning_rate_init": 2.972334644335654e-05, "tol": 0.0036281404040243792, "validation_fraction": 0.17260651658522078}, {"alpha": 4.656005689076002, "batch_size": 135, "beta_1": 0.870503881627747, "beta_2": 0.9948873266941017, "epsilon": 2.1023308743480125e-07, "hidden_layer_sizes": 118, "learning_rate_init": 0.001878173875716191, "tol": 1.1889379831773006e-05, "validation_fraction": 0.6264327093752792}, {"alpha": 0.04705159350400542, "batch_size": 158, "beta_1": 0.9870884262730957, "beta_2": 0.9999596874382349, "epsilon": 1.1981845126013875e-08, "hidden_layer_sizes": 116, "learning_rate_init": 0.006173405204074311, "tol": 1.7414134181586194e-05, "validation_fraction": 0.6754299026638921}], [0.4451881954692653, 1.5221793653163982, 0.7203531290637076, 0.12689150537518595, 0.028591134214524472]]},
"data": {"coords": {"iter": {"dims": ["iter"], "attrs": {}, "data": [0, 1, 2, 3, 4, 5, 6, 7, 8, 9, 10, 11, 12, 13, 14, 15, 16, 17, 18, 19]}, "suggestion": {"dims": ["suggestion"], "attrs": {}, "data": [0]}}, "attrs": {}, "dims": {"iter": 20, "suggestion": 1}, "data_vars": {"alpha": {"dims": ["iter", "suggestion"], "attrs": {}, "data": [[2.154134063817801], [1.3145068219450636e-05], [0.014811931661722642], [0.023256915946231575], [1.0914343624036371], [7.486970779573747e-05], [0.02637206954895319], [0.017708814873067174], [0.005032786829127716], [0.3263533534141152], [4.597035182666421e-05], [0.0009301771467443073], [4.479137161667574], [0.0016738591628748549], [0.016938114315691574], [0.18127328288180536], [8.880625414595292], [0.13578551795911892], [1.0559783695114797e-05], [0.0002947911054692631]]}, "batch_size": {"dims": ["iter", "suggestion"], "attrs": {}, "data": [[90], [140], [243], [181], [135], [199], [109], [40], [120], [215], [89], [60], [63], [64], [131], [37], [100], [88], [207], [85]]}, "beta_1": {"dims": ["iter", "suggestion"], "attrs": {}, "data": [[0.7441754839106007], [0.8240012214963475], [0.732420240661824], [0.7105890823820707], [0.5386841702531776], [0.9850796185251056], [0.6538244352148307], [0.83668798377895], [0.6990767932338792], [0.7118294427277395], [0.6899310131783903], [0.8250757846109261], [0.7347128822535233], [0.9171196064471855], [0.6537389806540594], [0.5387898504131255], [0.9433310805059772], [0.7177892768566964], [0.587359634460756], [0.7251022894148483]]}, "beta_2": {"dims": ["iter", "suggestion"], "attrs": {}, "data": [[0.9985065275496302], [0.9331663603101943], [0.9866073477214826], [0.9564157858940671], [0.9009232704372038], [0.9897438646442077], [0.9548027012412302], [0.9831336147520429], [0.9081862018903795], [0.9404028176739249], [0.9111951758817505], [0.9106685430378305], [0.9962356802205411], [0.9859721851687483], [0.9153404354036027], [0.9291667319457018], [0.9709161061065351], [0.964420455897583], [0.9947785417681424], [0.9862471650309346]]}, "epsilon": {"dims": ["iter", "suggestion"], "attrs": {}, "data": [[3.595255066613766e-07], [1.6438966018069043e-07], [7.688217123213243e-09], [3.103949475405364e-08], [9.369753263795456e-09], [4.286605841543378e-08], [4.838413628397636e-07], [2.542517580112307e-09], [2.3341994160647112e-07], [2.928231042670962e-09], [7.680585490208876e-07], [2.2941361837222287e-08], [5.5900778789816905e-09], [7.599657647532022e-09], [1.0350133734295869e-07], [3.495711501468117e-08], [1.0827371761831349e-09], [7.240975330468408e-07], [9.665770734740523e-08], [2.4636041753350843e-07]]}, "hidden_layer_sizes": {"dims": ["iter", "suggestion"], "attrs": {}, "data": [[179], [119], [180], [121], [164], [162], [116], [184], [186], [131], [65], [173], [143], [150], [91], [59], [63], [85], [183], [71]]}, "learning_rate_init": {"dims": ["iter", "suggestion"], "attrs": {}, "data": [[0.03700141941820724], [0.008290933888995393], [1.1686700711076664e-05], [0.023466279813168796], [2.6045135873647134e-05], [0.034049946292071434], [0.04168171592316864], [0.0023797108641292176], [0.01849362163018289], [0.05985903244856883], [0.022765394903941256], [3.0270873639131426e-05], [0.04868759016679163], [0.00850416707925011], [0.033700322555112835], [0.0009826982580840207], [0.00025894925387719977], [2.4581134965197527e-05], [0.004445002339391947], [6.0462973342646104e-05]]}, "tol": {"dims": ["iter", "suggestion"], "attrs": {}, "data": [[0.0012361237841285585], [0.022944933596052958], [0.06766829523578233], [0.0006168395476505262], [6.901530752705218e-05], [0.00026372524090781266], [1.1824917732315209e-05], [0.00047935286080081306], [1.0211792240378495e-05], [0.015750892124816323], [0.0005645834806242684], [7.601793870410512e-05], [3.925487834453378e-05], [7.48240643236318e-05], [0.004730450966344673], [0.012562168086849377], [0.00015516903669273723], [0.00011421332392538521], [0.09066112477521801], [0.0009000512830598922]]}, "validation_fraction": {"dims": ["iter", "suggestion"], "attrs": {}, "data": [[0.18674873238160605], [0.18778573188085432], [0.7838767311527416], [0.41513950431010427], [0.12108276642825393], [0.44736549366775874], [0.8382987207482435], [0.2405643803076567], [0.16327669529572053], [0.10633145182072526], [0.527433791742546], [0.3444063056488191], [0.21556523687732246], [0.5460079457924424], [0.697223445487967], [0.1261673935825581], [0.1828523587208478], [0.2501374407527296], [0.8571160248528563], [0.35486476973033465]]}}}}
