# Supplementary material
Source: ML conference proceedings conference paper supplement (https://proceedings.neurips.cc/paper_files/paper/2022/hash/31a57804448363bcab777f818f75f5b4-Abstract.html)
Supplement: Supplementary file 1 [file 31a57804448363bcab777f818f75f5b4-Supplemental-Conference.zip › trading_off_resource_budgets_f-Supplementary Material/code_and_data/experiments/base_results/bo_20220228_124924_b7rkpeqg/suggest_log/06f1a2a840ce5de1bd452eb1b2f20045.json]

{"meta": {"args": {"--uuid": "06f1a2a840ce5de1bd452eb1b2f20045", "-db-root": "/home/damon_falck/blackboxbandits/experiments/saved_results", "--opt-root": "/home/damon_falck/blackboxbandits/experiments", "--data-root": "/home/damon_falck/blackboxbandits/experiments/penn_datasets", "--db": "bo_20220228_124924_b7rkpeqg", "--opt": "Scikit-GBRT-Hedge", "--data": "clf-car", "--classifier": "lasso", "--metric": "nll", "--calls": 20, "--suggestions": 1, "--jobs-file": null, "--verbose": false, "dry_run": false, "rev": "bd14afd", "opt_rev": "0.9.0"}, "signature": [[{"C": 1.5676677195506077, "intercept_scaling": 7.257005721594282}, {"C": 2.57663857461359, "intercept_scaling": 1.5119336467641016}, {"C": 0.49501595537331966, "intercept_scaling": 3.833332156156665}, {"C": 0.5627932047415171, "intercept_scaling": 36.905577292137636}, {"C": 71.55682161754872, "intercept_scaling": 0.34179529120610125}], [0.2303473134131107, 0.22941919204924205, 0.2505443723489243, 0.2429764697464271, 0.22763637192494515]]},
"data": {"coords": {"iter": {"dims": ["iter"], "attrs": {}, "data": [0, 1, 2, 3, 4, 5, 6, 7, 8, 9, 10, 11, 12, 13, 14, 15, 16, 17, 18, 19]}, "suggestion": {"dims": ["suggestion"], "attrs": {}, "data": [0]}}, "attrs": {}, "dims": {"iter": 20, "suggestion": 1}, "data_vars": {"C": {"dims": ["iter", "suggestion"], "attrs": {}, "data": [[1.3976323334438414], [0.1035941025651081], [0.15089476342892535], [4.9578529586827855], [39.34965977776434], [86.3781878703003], [6.502342955516732], [21.959717765387392], [12.353521075626137], [10.272116816007756], [13.937391868918324], [3.522867399986813], [90.4188355808211], [17.271466560095504], [1.080803023423776], [1.6087792760119828], [66.95204116648138], [0.5935572033028176], [93.629940815754], [13.763779786837127]]}, "intercept_scaling": {"dims": ["iter", "suggestion"], "attrs": {}, "data": [[0.027368255094093824], [65.6859744336135], [0.8960825108106275], [0.4582085303528879], [4.082975825087598], [0.01379473123370609], [0.0557238926917548], [3.7011492436919826], [2.299112902322484], [0.029472285136486625], [1.9959563389463435], [0.021926791768723176], [0.02470229224380482], [0.026584730040329803], [0.0858981099117639], [0.014156752528307243], [1.9199164402459785], [0.013452050661154458], [0.050438070844473964], [2.2608388004978415]]}}}}
