# Supplementary material
Source: ML conference proceedings conference paper supplement (https://proceedings.neurips.cc/paper_files/paper/2022/hash/31a57804448363bcab777f818f75f5b4-Abstract.html)
Supplement: Supplementary file 1 [file 31a57804448363bcab777f818f75f5b4-Supplemental-Conference.zip › trading_off_resource_budgets_f-Supplementary Material/code_and_data/experiments/base_results/bo_20220228_124924_b7rkpeqg/suggest_log/07a12d7dce6b5321a7ee6ee6fd597009.json]

{"meta": {"args": {"--uuid": "07a12d7dce6b5321a7ee6ee6fd597009", "-db-root": "/home/damon_falck/blackboxbandits/experiments/saved_results", "--opt-root": "/home/damon_falck/blackboxbandits/experiments", "--data-root": "/home/damon_falck/blackboxbandits/experiments/penn_datasets", "--db": "bo_20220228_124924_b7rkpeqg", "--opt": "Scikit-GP-LCB", "--data": "reg-4544-GeographicalOriginalofMusic", "--classifier": "lasso", "--metric": "mse", "--calls": 20, "--suggestions": 1, "--jobs-file": null, "--verbose": false, "dry_run": false, "rev": "bd14afd", "opt_rev": "0.9.0"}, "signature": [[{"alpha": 1.5676677195506077, "fit_intercept": true, "max_iter": 423, "normalize": true, "positive": false, "tol": 0.0038333321561566623}, {"alpha": 0.5627932047415171, "fit_intercept": true, "max_iter": 3989, "normalize": false, "positive": true, "tol": 0.001304907355036239}, {"alpha": 1.871450068624068, "fit_intercept": true, "max_iter": 16, "normalize": false, "positive": false, "tol": 0.021403233140986057}, {"alpha": 12.960656597279737, "fit_intercept": true, "max_iter": 4378, "normalize": true, "positive": false, "tol": 0.013246974647468445}, {"alpha": 0.029723346443356558, "fit_intercept": true, "max_iter": 24, "normalize": true, "positive": true, "tol": 0.00045566719139214756}], [1.1719682433487997, 0.7744490762154501, 1.1719682433487997, 1.1719682433487997, 1.153218872014928]]},
"data": {"coords": {"iter": {"dims": ["iter"], "attrs": {}, "data": [0, 1, 2, 3, 4, 5, 6, 7, 8, 9, 10, 11, 12, 13, 14, 15, 16, 17, 18, 19]}, "suggestion": {"dims": ["suggestion"], "attrs": {}, "data": [0]}}, "attrs": {}, "dims": {"iter": 20, "suggestion": 1}, "data_vars": {"alpha": {"dims": ["iter", "suggestion"], "attrs": {}, "data": [[2.780819706772004], [0.09519082303568459], [0.0580320166159957], [52.41878111528057], [0.03680580416196277], [0.01], [0.031395245625801226], [0.01], [0.01], [0.014795865353279565], [0.01], [0.01], [0.01], [0.01783899373589746], [0.1828224150213652], [0.01], [0.01], [100.0], [0.017589407764312857], [0.01720378688734461]]}, "fit_intercept": {"dims": ["iter", "suggestion"], "attrs": {}, "data": [[1], [0], [1], [0], [1], [0], [0], [0], [1], [1], [0], [1], [1], [0], [0], [0], [1], [1], [0], [0]]}, "max_iter": {"dims": ["iter", "suggestion"], "attrs": {}, "data": [[4069], [4686], [4737], [4334], [2295], [5000], [5000], [1586], [5000], [5000], [10], [10], [5000], [5000], [5000], [10], [5000], [10], [5000], [5000]]}, "normalize": {"dims": ["iter", "suggestion"], "attrs": {}, "data": [[1], [1], [0], [1], [0], [1], [1], [1], [0], [0], [1], [0], [1], [0], [0], [0], [0], [1], [1], [1]]}, "positive": {"dims": ["iter", "suggestion"], "attrs": {}, "data": [[0], [0], [1], [0], [0], [1], [1], [1], [0], [0], [0], [0], [0], [0], [0], [0], [1], [1], [0], [0]]}, "tol": {"dims": ["iter", "suggestion"], "attrs": {}, "data": [[0.03819177346510155], [5.003025113088897e-05], [0.0006219200827436719], [0.001658356452591352], [3.2702437520145e-05], [1e-05], [1e-05], [0.1], [1e-05], [0.1], [1e-05], [1e-05], [0.1], [1e-05], [1e-05], [1e-05], [0.1], [0.1], [1e-05], [1e-05]]}}}}
