# Supplementary material
Source: ML conference proceedings conference paper supplement (https://proceedings.neurips.cc/paper_files/paper/2022/hash/31a57804448363bcab777f818f75f5b4-Abstract.html)
Supplement: Supplementary file 1 [file 31a57804448363bcab777f818f75f5b4-Supplemental-Conference.zip › trading_off_resource_budgets_f-Supplementary Material/code_and_data/experiments/base_results/bo_20220228_124924_b7rkpeqg/suggest_log/007dafb7ea965e399ecc1ac4a28b6fe0.json]

{"meta": {"args": {"--uuid": "007dafb7ea965e399ecc1ac4a28b6fe0", "-db-root": "/home/damon_falck/blackboxbandits/experiments/saved_results", "--opt-root": "/home/damon_falck/blackboxbandits/experiments", "--data-root": "/home/damon_falck/blackboxbandits/experiments/penn_datasets", "--db": "bo_20220228_124924_b7rkpeqg", "--opt": "OpenTuner-GA", "--data": "clf-ionosphere", "--classifier": "lasso", "--metric": "nll", "--calls": 20, "--suggestions": 1, "--jobs-file": null, "--verbose": false, "dry_run": false, "rev": "bd14afd", "opt_rev": "0.8.7"}, "signature": [[{"C": 1.5676677195506077, "intercept_scaling": 7.257005721594282}, {"C": 2.57663857461359, "intercept_scaling": 1.5119336467641016}, {"C": 0.49501595537331966, "intercept_scaling": 3.833332156156665}, {"C": 0.5627932047415171, "intercept_scaling": 36.905577292137636}, {"C": 71.55682161754872, "intercept_scaling": 0.34179529120610125}], [0.4632614887809384, 0.5636426451110038, 0.36984972935477406, 0.3697603157412027, 1.5749432801857801]]},
"data": {"coords": {"iter": {"dims": ["iter"], "attrs": {}, "data": [0, 1, 2, 3, 4, 5, 6, 7, 8, 9, 10, 11, 12, 13, 14, 15, 16, 17, 18, 19]}, "suggestion": {"dims": ["suggestion"], "attrs": {}, "data": [0]}}, "attrs": {}, "dims": {"iter": 20, "suggestion": 1}, "data_vars": {"C": {"dims": ["iter", "suggestion"], "attrs": {}, "data": [[1.6233932100389128], [27.333915518674285], [16.70755539644664], [1.6233932100389128], [0.14084707018441955], [2.0942737220581455], [43.36623069590051], [0.14084707018441955], [2.004370245853929], [1.944276150512194], [0.14084707018441955], [0.14084707018441955], [8.15065567256199], [41.01014500395659], [0.5722068227419124], [8.114190319029383], [8.375737652676785], [8.57724032010405], [1.9116581970927096], [1.1427028707619458]]}, "intercept_scaling": {"dims": ["iter", "suggestion"], "attrs": {}, "data": [[4.257358205835842], [1.457536557238994], [4.257358205835842], [28.740185670325424], [5.242237053562879], [7.163528216443609], [10.528870806183868], [58.01686697657496], [58.01686697657496], [0.7165708919610074], [0.7884764925051884], [3.7827915906591656], [14.590064526355773], [58.01686697657496], [40.00817988727405], [9.740509484249168], [22.36092131042212], [40.00817988727405], [40.00817988727405], [1.3789561564606274]]}}}}
