# Supplementary material
Source: ML conference proceedings conference paper supplement (https://proceedings.neurips.cc/paper_files/paper/2022/hash/31a57804448363bcab777f818f75f5b4-Abstract.html)
Supplement: Supplementary file 1 [file 31a57804448363bcab777f818f75f5b4-Supplemental-Conference.zip › trading_off_resource_budgets_f-Supplementary Material/code_and_data/experiments/base_results/bo_20220228_124924_b7rkpeqg/suggest_log/07db0a2dd9b953778057550f933e5c80.json]

{"meta": {"args": {"--uuid": "07db0a2dd9b953778057550f933e5c80", "-db-root": "/home/damon_falck/blackboxbandits/experiments/saved_results", "--opt-root": "/home/damon_falck/blackboxbandits/experiments", "--data-root": "/home/damon_falck/blackboxbandits/experiments/penn_datasets", "--db": "bo_20220228_124924_b7rkpeqg", "--opt": "RandomSearch", "--data": "clf-Hill-Valley-without-noise", "--classifier": "MLP-adam", "--metric": "nll", "--calls": 20, "--suggestions": 1, "--jobs-file": null, "--verbose": false, "dry_run": false, "rev": "bd14afd", "opt_rev": "0.0.8"}, "signature": [[{"alpha": 0.019628224813442792, "batch_size": 182, "beta_1": 0.9410202200271762, "beta_2": 0.9998021557676793, "epsilon": 1.8662266976518e-08, "hidden_layer_sizes": 147, "learning_rate_init": 0.0005627932047415167, "tol": 0.03690557729213761, "validation_fraction": 0.8846827852548593}, {"alpha": 0.001998246739232944, "batch_size": 200, "beta_1": 0.919111482530466, "beta_2": 0.9998488260436156, "epsilon": 5.981221901152555e-07, "hidden_layer_sizes": 61, "learning_rate_init": 2.2310905607443014e-05, "tol": 1.2046852412030316e-05, "validation_fraction": 0.8117896445826539}, {"alpha": 0.46659545670218433, "batch_size": 219, "beta_1": 0.9889789783750891, "beta_2": 0.9999896868093284, "epsilon": 2.4234724484675948e-08, "hidden_layer_sizes": 167, "learning_rate_init": 2.972334644335654e-05, "tol": 0.0036281404040243792, "validation_fraction": 0.17260651658522078}, {"alpha": 4.656005689076002, "batch_size": 135, "beta_1": 0.870503881627747, "beta_2": 0.9948873266941017, "epsilon": 2.1023308743480125e-07, "hidden_layer_sizes": 118, "learning_rate_init": 0.001878173875716191, "tol": 1.1889379831773006e-05, "validation_fraction": 0.6264327093752792}, {"alpha": 0.04705159350400542, "batch_size": 158, "beta_1": 0.9870884262730957, "beta_2": 0.9999596874382349, "epsilon": 1.1981845126013875e-08, "hidden_layer_sizes": 116, "learning_rate_init": 0.006173405204074311, "tol": 1.7414134181586194e-05, "validation_fraction": 0.6754299026638921}], [0.7547227075106365, 0.8425366991908654, 0.7064507377956198, 0.7076520830401882, 0.8216265976234706]]},
"data": {"coords": {"iter": {"dims": ["iter"], "attrs": {}, "data": [0, 1, 2, 3, 4, 5, 6, 7, 8, 9, 10, 11, 12, 13, 14, 15, 16, 17, 18, 19]}, "suggestion": {"dims": ["suggestion"], "attrs": {}, "data": [0]}}, "attrs": {}, "dims": {"iter": 20, "suggestion": 1}, "data_vars": {"alpha": {"dims": ["iter", "suggestion"], "attrs": {}, "data": [[0.6946189764075732], [0.0031366438626288305], [0.00217829444814035], [2.1363922814104646], [0.0017780642994898084], [0.007384219900176197], [0.003494707861578084], [0.03385895077858989], [0.0003357713441431291], [0.00032038125452556746], [3.8116604287127375e-05], [0.18008406212239186], [2.6574724711058737], [0.007500860751554162], [0.0010654415110830757], [6.793350758561858], [0.000891436117019349], [0.0002672443516556744], [0.0021661775178061877], [0.00029125199695084135]]}, "batch_size": {"dims": ["iter", "suggestion"], "attrs": {}, "data": [[80], [116], [111], [121], [44], [154], [73], [76], [186], [166], [55], [156], [88], [15], [140], [125], [195], [169], [224], [111]]}, "beta_1": {"dims": ["iter", "suggestion"], "attrs": {}, "data": [[0.9673033571078207], [0.7038110023055028], [0.9882704363234398], [0.8300594186195577], [0.7653414421021878], [0.9648567942020109], [0.9627815741325375], [0.8449993274267448], [0.9068773465474114], [0.9333082041949051], [0.7884931103535446], [0.5710331915394947], [0.9857253774916946], [0.9155137923757831], [0.983308196459172], [0.708963947576222], [0.9670917791932359], [0.9554602621301714], [0.9845391446157561], [0.9848483684007209]]}, "beta_2": {"dims": ["iter", "suggestion"], "attrs": {}, "data": [[0.9741114163347817], [0.9987350047677842], [0.9807529510782902], [0.9903363379253102], [0.977337825507739], [0.9998306723300469], [0.9889387103676048], [0.9966545432064926], [0.9999802985728944], [0.9903443482255088], [0.999000540305035], [0.9999702273429899], [0.9949225466600022], [0.9978694193592024], [0.9999983297591223], [0.9999934813221657], [0.9959858588877342], [0.9999986879877186], [0.974806634584182], [0.9999983120553629]]}, "epsilon": {"dims": ["iter", "suggestion"], "attrs": {}, "data": [[1.9844236965075475e-09], [7.476456232055167e-08], [2.6786956984451414e-07], [4.765709611141741e-07], [2.07561229882679e-08], [9.343877655573633e-08], [1.8529634089164818e-09], [7.726608584282762e-07], [3.546761953416267e-07], [2.2588346951128776e-09], [3.485660195357143e-07], [1.4494286315510916e-07], [2.686448198838411e-07], [3.424710771446087e-07], [1.9820401835326843e-08], [1.2306039797578313e-09], [3.2554943182729884e-09], [1.603392250950315e-08], [3.578742584093724e-07], [1.402885489807289e-08]]}, "hidden_layer_sizes": {"dims": ["iter", "suggestion"], "attrs": {}, "data": [[52], [101], [190], [55], [180], [161], [62], [178], [87], [75], [98], [118], [135], [180], [184], [116], [162], [90], [120], [50]]}, "learning_rate_init": {"dims": ["iter", "suggestion"], "attrs": {}, "data": [[0.0043992210385131085], [0.00011364249497723502], [4.5431828554514826e-05], [0.019389953072287195], [2.7643552883365246e-05], [0.02358472230533222], [0.029089790668330485], [4.3285885727012225e-05], [0.00018218324375466745], [0.022017972230075324], [0.0002964062497412737], [0.005855325039398107], [0.0007197619452504367], [0.00010654581558743493], [0.00011940221723216595], [0.0009272478779904605], [0.011488039428392239], [2.8359388663857856e-05], [0.0013151747167182606], [8.6798588384669e-05]]}, "tol": {"dims": ["iter", "suggestion"], "attrs": {}, "data": [[0.04722024410952004], [1.9390669222143456e-05], [0.006928282276262935], [0.030578063705296053], [0.003418054242119851], [0.00010498500860118095], [7.590899120534379e-05], [0.06508093630467178], [1.1417642731006756e-05], [0.04532559380324451], [0.0026561790804188576], [0.001678287903165949], [1.3972719670562257e-05], [0.001602619024669831], [2.9324090451548587e-05], [0.0030185302474379106], [0.0004586942397036693], [0.015403340063936165], [0.04337107429016805], [0.0001398761905731707]]}, "validation_fraction": {"dims": ["iter", "suggestion"], "attrs": {}, "data": [[0.48545142109729406], [0.8167662153307682], [0.8054938091281922], [0.8710235229984572], [0.6031960844152429], [0.17610624292169963], [0.18287330341637104], [0.13860813288095586], [0.7871354498307394], [0.5263015357597892], [0.4919123985121119], [0.12974870907829758], [0.21770987412087112], [0.49775221968900857], [0.11133525776134706], [0.5909562598104692], [0.6200641567560005], [0.6280161919399039], [0.1886547823615532], [0.549216101318209]]}}}}
