# Supplementary material
Source: ML conference proceedings conference paper supplement (https://proceedings.neurips.cc/paper_files/paper/2022/hash/31a57804448363bcab777f818f75f5b4-Abstract.html)
Supplement: Supplementary file 1 [file 31a57804448363bcab777f818f75f5b4-Supplemental-Conference.zip › trading_off_resource_budgets_f-Supplementary Material/code_and_data/experiments/base_results/bo_20220228_124924_b7rkpeqg/suggest_log/07f93e12299d5095b92883904ccecc59.json]

{"meta": {"args": {"--uuid": "07f93e12299d5095b92883904ccecc59", "-db-root": "/home/damon_falck/blackboxbandits/experiments/saved_results", "--opt-root": "/home/damon_falck/blackboxbandits/experiments", "--data-root": "/home/damon_falck/blackboxbandits/experiments/penn_datasets", "--db": "bo_20220228_124924_b7rkpeqg", "--opt": "OpenTuner-GA-DE", "--data": "reg-706-sleuth-case1202", "--classifier": "MLP-adam", "--metric": "mse", "--calls": 20, "--suggestions": 1, "--jobs-file": null, "--verbose": false, "dry_run": false, "rev": "bd14afd", "opt_rev": "0.8.7"}, "signature": [[{"alpha": 0.019628224813442792, "batch_size": 182, "beta_1": 0.9410202200271762, "beta_2": 0.9998021557676793, "epsilon": 1.8662266976518e-08, "hidden_layer_sizes": 147, "learning_rate_init": 0.0005627932047415167, "tol": 0.03690557729213761, "validation_fraction": 0.8846827852548593}, {"alpha": 0.001998246739232944, "batch_size": 200, "beta_1": 0.919111482530466, "beta_2": 0.9998488260436156, "epsilon": 5.981221901152555e-07, "hidden_layer_sizes": 61, "learning_rate_init": 2.2310905607443014e-05, "tol": 1.2046852412030316e-05, "validation_fraction": 0.8117896445826539}, {"alpha": 0.46659545670218433, "batch_size": 219, "beta_1": 0.9889789783750891, "beta_2": 0.9999896868093284, "epsilon": 2.4234724484675948e-08, "hidden_layer_sizes": 167, "learning_rate_init": 2.972334644335654e-05, "tol": 0.0036281404040243792, "validation_fraction": 0.17260651658522078}, {"alpha": 4.656005689076002, "batch_size": 135, "beta_1": 0.870503881627747, "beta_2": 0.9948873266941017, "epsilon": 2.1023308743480125e-07, "hidden_layer_sizes": 118, "learning_rate_init": 0.001878173875716191, "tol": 1.1889379831773006e-05, "validation_fraction": 0.6264327093752792}, {"alpha": 0.04705159350400542, "batch_size": 158, "beta_1": 0.9870884262730957, "beta_2": 0.9999596874382349, "epsilon": 1.1981845126013875e-08, "hidden_layer_sizes": 116, "learning_rate_init": 0.006173405204074311, "tol": 1.7414134181586194e-05, "validation_fraction": 0.6754299026638921}], [1.3878866375198853, 1.4937508014059389, 1.4909637467226107, 0.5146547679843546, 0.7791703224052637]]},
"data": {"coords": {"iter": {"dims": ["iter"], "attrs": {}, "data": [0, 1, 2, 3, 4, 5, 6, 7, 8, 9, 10, 11, 12, 13, 14, 15, 16, 17, 18, 19]}, "suggestion": {"dims": ["suggestion"], "attrs": {}, "data": [0]}}, "attrs": {}, "dims": {"iter": 20, "suggestion": 1}, "data_vars": {"alpha": {"dims": ["iter", "suggestion"], "attrs": {}, "data": [[9.614568058698133], [9.614568058698133], [3.268195202905041], [1.5344516689510712], [9.614568058698133], [0.044598216093220726], [0.25571688589290614], [9.614568058698133], [9.614568058698133], [9.614568058698133], [9.614568058698133], [9.614568058698133], [6.501400016823652], [9.614568058698133], [9.614568058698133], [9.614568058698133], [9.614568058698133], [6.5793250307049105], [9.614568058698133], [9.614568058698133]]}, "batch_size": {"dims": ["iter", "suggestion"], "attrs": {}, "data": [[145], [145], [225], [114], [145], [21], [121], [154], [154], [154], [154], [154], [154], [154], [155], [154], [154], [154], [154], [84]]}, "beta_1": {"dims": ["iter", "suggestion"], "attrs": {}, "data": [[0.9895169529218688], [0.9895169529218688], [0.8888285348667797], [0.9768421346100922], [0.5481406643859635], [0.8023614497614189], [0.6843957000594285], [0.9895169529218688], [0.9391673994639382], [0.9895169529218688], [0.7904183208497426], [0.9895169529218688], [0.9895169529218688], [0.9895169529218688], [0.9895169529218688], [0.9895169529218688], [0.9895169529218688], [0.9895169529218688], [0.9895169529218688], [0.9895169529218688]]}, "beta_2": {"dims": ["iter", "suggestion"], "attrs": {}, "data": [[0.9285731211333054], [0.9285731211333054], [0.9734898130976674], [0.9071111370378329], [0.9285731211333054], [0.9702119073432391], [0.9037652224923939], [0.9285731211333054], [0.9285731211333054], [0.9285731211333054], [0.9285731211333054], [0.9285731211333054], [0.9285731211333054], [0.9285731211333054], [0.9285731211333054], [0.9285731211333054], [0.9285731211333054], [0.9285731211333054], [0.9285731211333054], [0.9098016019006557]]}, "epsilon": {"dims": ["iter", "suggestion"], "attrs": {}, "data": [[8.419757294991493e-07], [9.561083921532922e-07], [9.961908142014077e-07], [9.787203870964258e-07], [9.561083921532922e-07], [3.5698528969060796e-07], [9.281417718004215e-07], [9.561083921532922e-07], [9.561083921532922e-07], [9.561083921532922e-07], [9.561083921532922e-07], [9.561083921532922e-07], [9.561083921532922e-07], [9.561083921532922e-07], [9.561083921532922e-07], [9.561083921532922e-07], [9.561083921532922e-07], [9.561083921532922e-07], [9.561083921532922e-07], [9.561083921532922e-07]]}, "hidden_layer_sizes": {"dims": ["iter", "suggestion"], "attrs": {}, "data": [[196], [196], [113], [121], [196], [98], [107], [196], [196], [196], [104], [196], [196], [196], [196], [196], [196], [196], [196], [196]]}, "learning_rate_init": {"dims": ["iter", "suggestion"], "attrs": {}, "data": [[0.0400750945420511], [0.0400750945420511], [0.008773404470347735], [0.071172961892274], [0.0400750945420511], [0.024199500422339582], [0.0877110697147802], [0.03846356086846641], [0.038222519998862774], [0.09509333406445901], [0.03846356086846641], [0.012574880901061448], [0.03846356086846641], [0.03846356086846641], [0.03846356086846641], [0.03879489498580873], [0.03846356086846641], [0.03846356086846641], [0.03846356086846641], [0.03846356086846641]]}, "tol": {"dims": ["iter", "suggestion"], "attrs": {}, "data": [[0.054574041491026896], [0.054574041491026896], [0.010607455644403064], [0.0533205147684736], [0.054574041491026896], [0.09863588507362102], [0.009358075657892307], [0.054574041491026896], [0.054574041491026896], [0.054574041491026896], [0.054574041491026896], [0.054574041491026896], [0.054574041491026896], [0.0485607170768984], [0.054574041491026896], [0.054574041491026896], [0.020391240937899836], [0.054574041491026896], [0.06717016373234068], [0.054574041491026896]]}, "validation_fraction": {"dims": ["iter", "suggestion"], "attrs": {}, "data": [[0.7409288360191029], [0.1332118638745568], [0.6302595825129969], [0.16469054341161674], [0.1332118638745568], [0.7028806888448217], [0.760016827665946], [0.1332118638745568], [0.13440692381189945], [0.33634101219863455], [0.1332118638745568], [0.1332118638745568], [0.1332118638745568], [0.11523353884304514], [0.1332118638745568], [0.1332118638745568], [0.21249915545988954], [0.11756392868038874], [0.1332118638745568], [0.1332118638745568]]}}}}
