# Supplementary material
Source: ML conference proceedings conference paper supplement (https://proceedings.neurips.cc/paper_files/paper/2022/hash/31a57804448363bcab777f818f75f5b4-Abstract.html)
Supplement: Supplementary file 1 [file 31a57804448363bcab777f818f75f5b4-Supplemental-Conference.zip › trading_off_resource_budgets_f-Supplementary Material/code_and_data/experiments/base_results/bo_20220228_124924_b7rkpeqg/suggest_log/08a04a2f27e557ec919925572cdfd1a8.json]

{"meta": {"args": {"--uuid": "08a04a2f27e557ec919925572cdfd1a8", "-db-root": "/home/damon_falck/blackboxbandits/experiments/saved_results", "--opt-root": "/home/damon_falck/blackboxbandits/experiments", "--data-root": "/home/damon_falck/blackboxbandits/experiments/penn_datasets", "--db": "bo_20220228_124924_b7rkpeqg", "--opt": "OpenTuner-GA", "--data": "reg-658-fri-c3-250-25", "--classifier": "lasso", "--metric": "mse", "--calls": 20, "--suggestions": 1, "--jobs-file": null, "--verbose": false, "dry_run": false, "rev": "bd14afd", "opt_rev": "0.8.7"}, "signature": [[{"alpha": 1.5676677195506077, "fit_intercept": true, "max_iter": 423, "normalize": true, "positive": false, "tol": 0.0038333321561566623}, {"alpha": 0.5627932047415171, "fit_intercept": true, "max_iter": 3989, "normalize": false, "positive": true, "tol": 0.001304907355036239}, {"alpha": 1.871450068624068, "fit_intercept": true, "max_iter": 16, "normalize": false, "positive": false, "tol": 0.021403233140986057}, {"alpha": 12.960656597279737, "fit_intercept": true, "max_iter": 4378, "normalize": true, "positive": false, "tol": 0.013246974647468445}, {"alpha": 0.029723346443356558, "fit_intercept": true, "max_iter": 24, "normalize": true, "positive": true, "tol": 0.00045566719139214756}], [1.0182534289516483, 1.0182534289516483, 1.0182534289516483, 1.0182534289516483, 1.0048006315124574]]},
"data": {"coords": {"iter": {"dims": ["iter"], "attrs": {}, "data": [0, 1, 2, 3, 4, 5, 6, 7, 8, 9, 10, 11, 12, 13, 14, 15, 16, 17, 18, 19]}, "suggestion": {"dims": ["suggestion"], "attrs": {}, "data": [0]}}, "attrs": {}, "dims": {"iter": 20, "suggestion": 1}, "data_vars": {"alpha": {"dims": ["iter", "suggestion"], "attrs": {}, "data": [[56.31973889400667], [0.9899616697101359], [56.31973889400667], [56.31973889400667], [0.6752490111418072], [56.31973889400667], [56.31973889400667], [58.84264120836253], [78.62416741029146], [0.9369057459212264], [56.31973889400667], [0.11439640347751999], [25.62396736004169], [85.5695679178607], [26.14225385755635], [27.552463931076634], [56.31973889400667], [56.31973889400667], [81.83096037460663], [31.437314553066063]]}, "fit_intercept": {"dims": ["iter", "suggestion"], "attrs": {}, "data": [[1], [0], [1], [1], [1], [1], [1], [0], [1], [1], [1], [1], [0], [1], [0], [1], [1], [0], [0], [0]]}, "max_iter": {"dims": ["iter", "suggestion"], "attrs": {}, "data": [[17], [34], [16], [17], [17], [1962], [17], [1590], [978], [66], [17], [10], [10], [105], [83], [11], [10], [17], [39], [11]]}, "normalize": {"dims": ["iter", "suggestion"], "attrs": {}, "data": [[1], [0], [1], [1], [1], [1], [1], [1], [1], [0], [1], [1], [1], [0], [0], [0], [1], [1], [1], [0]]}, "positive": {"dims": ["iter", "suggestion"], "attrs": {}, "data": [[0], [1], [0], [1], [0], [0], [0], [1], [0], [0], [0], [1], [1], [0], [1], [0], [0], [0], [0], [0]]}, "tol": {"dims": ["iter", "suggestion"], "attrs": {}, "data": [[0.0107270233136602], [0.09998106488019569], [0.0107270233136602], [0.0107270233136602], [0.0107270233136602], [0.0107270233136602], [0.034699651815253744], [0.022697970081967545], [0.030966209286266966], [0.06806601914624492], [0.07073177398676316], [0.0777013682125595], [0.06496688461833659], [0.04018469159299925], [0.01570275403390158], [0.02265113817910296], [0.0107270233136602], [0.0107270233136602], [0.0314197155186881], [0.04315490420053896]]}}}}
