# Supplementary material
Source: ML conference proceedings conference paper supplement (https://proceedings.neurips.cc/paper_files/paper/2022/hash/31a57804448363bcab777f818f75f5b4-Abstract.html)
Supplement: Supplementary file 1 [file 31a57804448363bcab777f818f75f5b4-Supplemental-Conference.zip › trading_off_resource_budgets_f-Supplementary Material/code_and_data/experiments/base_results/bo_20220228_124924_b7rkpeqg/suggest_log/08b4776df9f556958f9d123063082efe.json]

{"meta": {"args": {"--uuid": "08b4776df9f556958f9d123063082efe", "-db-root": "/home/damon_falck/blackboxbandits/experiments/saved_results", "--opt-root": "/home/damon_falck/blackboxbandits/experiments", "--data-root": "/home/damon_falck/blackboxbandits/experiments/penn_datasets", "--db": "bo_20220228_124924_b7rkpeqg", "--opt": "PySOT", "--data": "clf-spectf", "--classifier": "MLP-adam", "--metric": "nll", "--calls": 20, "--suggestions": 1, "--jobs-file": null, "--verbose": false, "dry_run": false, "rev": "bd14afd", "opt_rev": "0.3.3"}, "signature": [[{"alpha": 0.019628224813442792, "batch_size": 182, "beta_1": 0.9410202200271762, "beta_2": 0.9998021557676793, "epsilon": 1.8662266976518e-08, "hidden_layer_sizes": 147, "learning_rate_init": 0.0005627932047415167, "tol": 0.03690557729213761, "validation_fraction": 0.8846827852548593}, {"alpha": 0.001998246739232944, "batch_size": 200, "beta_1": 0.919111482530466, "beta_2": 0.9998488260436156, "epsilon": 5.981221901152555e-07, "hidden_layer_sizes": 61, "learning_rate_init": 2.2310905607443014e-05, "tol": 1.2046852412030316e-05, "validation_fraction": 0.8117896445826539}, {"alpha": 0.46659545670218433, "batch_size": 219, "beta_1": 0.9889789783750891, "beta_2": 0.9999896868093284, "epsilon": 2.4234724484675948e-08, "hidden_layer_sizes": 167, "learning_rate_init": 2.972334644335654e-05, "tol": 0.0036281404040243792, "validation_fraction": 0.17260651658522078}, {"alpha": 4.656005689076002, "batch_size": 135, "beta_1": 0.870503881627747, "beta_2": 0.9948873266941017, "epsilon": 2.1023308743480125e-07, "hidden_layer_sizes": 118, "learning_rate_init": 0.001878173875716191, "tol": 1.1889379831773006e-05, "validation_fraction": 0.6264327093752792}, {"alpha": 0.04705159350400542, "batch_size": 158, "beta_1": 0.9870884262730957, "beta_2": 0.9999596874382349, "epsilon": 1.1981845126013875e-08, "hidden_layer_sizes": 116, "learning_rate_init": 0.006173405204074311, "tol": 1.7414134181586194e-05, "validation_fraction": 0.6754299026638921}], [0.5188439873190223, 0.844191991671584, 0.6992151326432227, 0.4626674130048035, 0.3957066822785789]]},
"data": {"coords": {"iter": {"dims": ["iter"], "attrs": {}, "data": [0, 1, 2, 3, 4, 5, 6, 7, 8, 9, 10, 11, 12, 13, 14, 15, 16, 17, 18, 19]}, "suggestion": {"dims": ["suggestion"], "attrs": {}, "data": [0]}}, "attrs": {}, "dims": {"iter": 20, "suggestion": 1}, "data_vars": {"alpha": {"dims": ["iter", "suggestion"], "attrs": {}, "data": [[9.999999999999993], [4.83293023857175], [2.335721469090121], [1.1288378916846884], [0.5455594781168516], [0.26366508987303566], [0.12742749857031332], [0.06158482110660261], [0.02976351441631317], [0.014384498882876622], [0.006951927961775603], [0.0033598182862837806], [0.0016237767391887213], [0.000784759970351461], [0.00037926901907322483], [0.00018329807108324355], [8.858667904100825e-05], [4.281332398719393e-05], [2.0691380811147893e-05], [1e-05]]}, "batch_size": {"dims": ["iter", "suggestion"], "attrs": {}, "data": [[23], [250], [174], [111], [61], [136], [162], [35], [48], [73], [187], [212], [225], [98], [124], [199], [149], [86], [10], [237]]}, "beta_1": {"dims": ["iter", "suggestion"], "attrs": {}, "data": [[0.5601691112332966], [0.8737783560030866], [0.7245996927839187], [0.979559296902854], [0.983879679978582], [0.9479541442141259], [0.5], [0.9586728167212022], [0.8981316820878965], [0.7701648138534285], [0.9672602541081504], [0.9182259946416425], [0.8101662030295932], [0.99], [0.8446102619101786], [0.6186204456556995], [0.6738269458326034], [0.9741114818089212], [0.9346449825914023], [0.9872987396200723]]}, "beta_2": {"dims": ["iter", "suggestion"], "attrs": {}, "data": [[0.9999937382431806], [0.9991665758106772], [0.9999966027204835], [0.9999787273301525], [0.999999], [0.9995476594212053], [0.9984649335447215], [0.9999884585582154], [0.9999981568282956], [0.9999607914870667], [0.9971742639860776], [0.9431448601635043], [0.9904647546331645], [0.9999277343065309], [0.9997545351760231], [0.9], [0.994804058715712], [0.9683299652234193], [0.9998668099218998], [0.9825650652299448]]}, "epsilon": {"dims": ["iter", "suggestion"], "attrs": {}, "data": [[6.951927961775609e-07], [4.281332398719397e-09], [3.792690190732252e-08], [4.832930238571755e-07], [8.858667904100832e-09], [2.9763514416313203e-09], [1.0000000000000007e-09], [7.847599703514617e-08], [5.4555947811685225e-08], [1.6237767391887228e-07], [6.158482110660268e-09], [1.832980710832437e-08], [1.2742749857031345e-08], [1e-06], [3.3598182862837836e-07], [1.1288378916846897e-07], [2.069138081114791e-09], [2.6366508987303598e-08], [2.3357214690901236e-07], [1.4384498882876638e-09]]}, "hidden_layer_sizes": {"dims": ["iter", "suggestion"], "attrs": {}, "data": [[129], [161], [113], [74], [105], [97], [50], [66], [168], [58], [192], [82], [184], [200], [153], [145], [176], [137], [89], [121]]}, "learning_rate_init": {"dims": ["iter", "suggestion"], "attrs": {}, "data": [[0.00018329807108324355], [0.0379269019073225], [4.281332398719393e-05], [0.014384498882876635], [0.06158482110660261], [0.1], [0.0012742749857031336], [0.00048329302385717544], [0.00029763514416313155], [0.00011288378916846895], [0.008858667904100828], [0.0033598182862837806], [0.00206913808111479], [0.000784759970351461], [1e-05], [1.6237767391887205e-05], [6.9519279617756e-05], [0.02335721469090122], [2.6366508987303593e-05], [0.005455594781168523]]}, "tol": {"dims": ["iter", "suggestion"], "attrs": {}, "data": [[0.1], [0.014384498882876635], [1.6237767391887205e-05], [0.008858667904100828], [2.6366508987303593e-05], [0.00048329302385717544], [0.0033598182862837806], [0.000784759970351461], [4.281332398719393e-05], [0.005455594781168523], [0.00018329807108324355], [0.02335721469090122], [0.0012742749857031336], [0.00029763514416313155], [0.00206913808111479], [0.0379269019073225], [0.00011288378916846895], [0.06158482110660261], [6.9519279617756e-05], [1e-05]]}, "validation_fraction": {"dims": ["iter", "suggestion"], "attrs": {}, "data": [[0.6920037552317788], [0.7390025220082963], [0.4141270378617541], [0.7810981548834541], [0.35934296642401403], [0.10000000000000002], [0.4711213269538386], [0.1228258790010846], [0.818075696408975], [0.14999363445450717], [0.8500063655454929], [0.181924303591025], [0.8771741209989155], [0.5288786730461614], [0.8999999999999999], [0.6406570335759859], [0.2189018451165458], [0.5858729621382459], [0.26099747799170364], [0.30799624476822124]]}}}}
