# Supplementary material
Source: ML conference proceedings conference paper supplement (https://proceedings.neurips.cc/paper_files/paper/2022/hash/31a57804448363bcab777f818f75f5b4-Abstract.html)
Supplement: Supplementary file 1 [file 31a57804448363bcab777f818f75f5b4-Supplemental-Conference.zip › trading_off_resource_budgets_f-Supplementary Material/code_and_data/experiments/base_results/bo_20220228_124924_b7rkpeqg/suggest_log/08c7ab5e8e57566c94426fbaf8c176b5.json]

{"meta": {"args": {"--uuid": "08c7ab5e8e57566c94426fbaf8c176b5", "-db-root": "/home/damon_falck/blackboxbandits/experiments/saved_results", "--opt-root": "/home/damon_falck/blackboxbandits/experiments", "--data-root": "/home/damon_falck/blackboxbandits/experiments/penn_datasets", "--db": "bo_20220228_124924_b7rkpeqg", "--opt": "OpenTuner-GA-DE", "--data": "clf-glass2", "--classifier": "MLP-adam", "--metric": "nll", "--calls": 20, "--suggestions": 1, "--jobs-file": null, "--verbose": false, "dry_run": false, "rev": "bd14afd", "opt_rev": "0.8.7"}, "signature": [[{"alpha": 0.019628224813442792, "batch_size": 182, "beta_1": 0.9410202200271762, "beta_2": 0.9998021557676793, "epsilon": 1.8662266976518e-08, "hidden_layer_sizes": 147, "learning_rate_init": 0.0005627932047415167, "tol": 0.03690557729213761, "validation_fraction": 0.8846827852548593}, {"alpha": 0.001998246739232944, "batch_size": 200, "beta_1": 0.919111482530466, "beta_2": 0.9998488260436156, "epsilon": 5.981221901152555e-07, "hidden_layer_sizes": 61, "learning_rate_init": 2.2310905607443014e-05, "tol": 1.2046852412030316e-05, "validation_fraction": 0.8117896445826539}, {"alpha": 0.46659545670218433, "batch_size": 219, "beta_1": 0.9889789783750891, "beta_2": 0.9999896868093284, "epsilon": 2.4234724484675948e-08, "hidden_layer_sizes": 167, "learning_rate_init": 2.972334644335654e-05, "tol": 0.0036281404040243792, "validation_fraction": 0.17260651658522078}, {"alpha": 4.656005689076002, "batch_size": 135, "beta_1": 0.870503881627747, "beta_2": 0.9948873266941017, "epsilon": 2.1023308743480125e-07, "hidden_layer_sizes": 118, "learning_rate_init": 0.001878173875716191, "tol": 1.1889379831773006e-05, "validation_fraction": 0.6264327093752792}, {"alpha": 0.04705159350400542, "batch_size": 158, "beta_1": 0.9870884262730957, "beta_2": 0.9999596874382349, "epsilon": 1.1981845126013875e-08, "hidden_layer_sizes": 116, "learning_rate_init": 0.006173405204074311, "tol": 1.7414134181586194e-05, "validation_fraction": 0.6754299026638921}], [0.6857490551701919, 0.7404991197508362, 0.7036050871395986, 0.6629366845559661, 0.648725328815356]]},
"data": {"coords": {"iter": {"dims": ["iter"], "attrs": {}, "data": [0, 1, 2, 3, 4, 5, 6, 7, 8, 9, 10, 11, 12, 13, 14, 15, 16, 17, 18, 19]}, "suggestion": {"dims": ["suggestion"], "attrs": {}, "data": [0]}}, "attrs": {}, "dims": {"iter": 20, "suggestion": 1}, "data_vars": {"alpha": {"dims": ["iter", "suggestion"], "attrs": {}, "data": [[4.549465543779216], [4.549465543779216], [0.427963350243679], [4.549465543779216], [3.0048089020123867], [4.549465543779216], [4.549465543779216], [3.9079088080154203], [4.549465543779216], [9.85002997397771], [4.549465543779216], [4.549465543779216], [0.14574955571367648], [9.20498971154279], [6.104770573026473], [2.3471293184387827], [4.549465543779216], [0.7140648548881358], [4.549465543779216], [4.549465543779216]]}, "batch_size": {"dims": ["iter", "suggestion"], "attrs": {}, "data": [[165], [165], [179], [165], [111], [165], [165], [232], [165], [29], [165], [165], [143], [165], [165], [32], [131], [164], [165], [142]]}, "beta_1": {"dims": ["iter", "suggestion"], "attrs": {}, "data": [[0.9825343432264073], [0.9825343432264073], [0.5447353989028382], [0.9825343432264073], [0.8456550207310727], [0.9825343432264073], [0.9825343432264073], [0.7335215005440038], [0.9825343432264073], [0.5383013819326206], [0.9674364836180991], [0.9825343432264073], [0.947179754809472], [0.9825343432264073], [0.9825343432264073], [0.7502103116153053], [0.9825343432264073], [0.9695983751148458], [0.9825343432264073], [0.6136240756800895]]}, "beta_2": {"dims": ["iter", "suggestion"], "attrs": {}, "data": [[0.9020159090863188], [0.9020159090863188], [0.953252027095471], [0.900706186305104], [0.9181947233736555], [0.9007455453441819], [0.900706186305104], [0.9392048659014458], [0.900706186305104], [0.9183514027045051], [0.900706186305104], [0.900706186305104], [0.917658453967695], [0.900706186305104], [0.900706186305104], [0.9443951379960216], [0.900706186305104], [0.9157262505548235], [0.900706186305104], [0.900706186305104]]}, "epsilon": {"dims": ["iter", "suggestion"], "attrs": {}, "data": [[6.168723098170782e-07], [6.168723098170782e-07], [3.8677951255724943e-07], [6.168723098170782e-07], [2.185404456572494e-07], [9.57786783801178e-07], [6.168723098170782e-07], [6.948064947004108e-07], [6.490921672658013e-07], [7.133253290877894e-08], [7.596607089216102e-07], [5.356805584949265e-07], [9.829765316443353e-07], [6.490921672658013e-07], [6.490921672658013e-07], [6.231774040415795e-07], [6.490921672658013e-07], [5.358909284386138e-07], [6.490921672658013e-07], [6.490921672658013e-07]]}, "hidden_layer_sizes": {"dims": ["iter", "suggestion"], "attrs": {}, "data": [[150], [150], [91], [150], [112], [150], [150], [109], [138], [105], [138], [138], [89], [138], [108], [86], [138], [172], [138], [138]]}, "learning_rate_init": {"dims": ["iter", "suggestion"], "attrs": {}, "data": [[0.09554228090632948], [0.09554228090632948], [0.04531521972117585], [0.09554228090632948], [0.018689050363727523], [0.09554228090632948], [0.0392912749228495], [0.040911671711344626], [0.09554228090632948], [0.042974980991879956], [0.08325709863104495], [0.09554228090632948], [0.04047891525580221], [0.09620347724618854], [0.09554228090632948], [0.06633089306828792], [0.09554228090632948], [0.05807785056627839], [0.09554228090632948], [0.01866519366155488]]}, "tol": {"dims": ["iter", "suggestion"], "attrs": {}, "data": [[0.011965318848035245], [0.011965318848035245], [0.09375613078172378], [0.011965318848035245], [0.013151831110053736], [0.011965318848035245], [0.011965318848035245], [0.06838412095054751], [0.011965318848035245], [0.0837411545649837], [0.011965318848035245], [0.011965318848035245], [0.05908238965978912], [0.011965318848035245], [0.011965318848035245], [0.023878148155360424], [0.011965318848035245], [0.017499439654324368], [0.011965318848035245], [0.011965318848035245]]}, "validation_fraction": {"dims": ["iter", "suggestion"], "attrs": {}, "data": [[0.18006669403643746], [0.38710340380765995], [0.4687031514685055], [0.18006669403643746], [0.7486240774734738], [0.18006669403643746], [0.18006669403643746], [0.602591680730994], [0.18006669403643746], [0.2584488406423223], [0.18006669403643746], [0.18006669403643746], [0.7439172890789888], [0.18006669403643746], [0.18006669403643746], [0.7626796007467881], [0.18006669403643746], [0.518747900439302], [0.11787605603612329], [0.18006669403643746]]}}}}
