# Supplementary material
Source: ML conference proceedings conference paper supplement (https://proceedings.neurips.cc/paper_files/paper/2022/hash/31a57804448363bcab777f818f75f5b4-Abstract.html)
Supplement: Supplementary file 1 [file 31a57804448363bcab777f818f75f5b4-Supplemental-Conference.zip › trading_off_resource_budgets_f-Supplementary Material/code_and_data/experiments/base_results/bo_20220228_124924_b7rkpeqg/suggest_log/08e4d1a9138c5898a78c75ce60b61e10.json]

{"meta": {"args": {"--uuid": "08e4d1a9138c5898a78c75ce60b61e10", "-db-root": "/home/damon_falck/blackboxbandits/experiments/saved_results", "--opt-root": "/home/damon_falck/blackboxbandits/experiments", "--data-root": "/home/damon_falck/blackboxbandits/experiments/penn_datasets", "--db": "bo_20220228_124924_b7rkpeqg", "--opt": "OpenTuner-GA", "--data": "reg-562-cpu-small", "--classifier": "lasso", "--metric": "mse", "--calls": 20, "--suggestions": 1, "--jobs-file": null, "--verbose": false, "dry_run": false, "rev": "bd14afd", "opt_rev": "0.8.7"}, "signature": [[{"alpha": 1.5676677195506077, "fit_intercept": true, "max_iter": 423, "normalize": true, "positive": false, "tol": 0.0038333321561566623}, {"alpha": 0.5627932047415171, "fit_intercept": true, "max_iter": 3989, "normalize": false, "positive": true, "tol": 0.001304907355036239}, {"alpha": 1.871450068624068, "fit_intercept": true, "max_iter": 16, "normalize": false, "positive": false, "tol": 0.021403233140986057}, {"alpha": 12.960656597279737, "fit_intercept": true, "max_iter": 4378, "normalize": true, "positive": false, "tol": 0.013246974647468445}, {"alpha": 0.029723346443356558, "fit_intercept": true, "max_iter": 24, "normalize": true, "positive": true, "tol": 0.00045566719139214756}], [3.0561122972803973, 1.815207631742129, 0.681533285588009, 3.0561122972803973, 3.0561122972803973]]},
"data": {"coords": {"iter": {"dims": ["iter"], "attrs": {}, "data": [0, 1, 2, 3, 4, 5, 6, 7, 8, 9, 10, 11, 12, 13, 14, 15, 16, 17, 18, 19]}, "suggestion": {"dims": ["suggestion"], "attrs": {}, "data": [0]}}, "attrs": {}, "dims": {"iter": 20, "suggestion": 1}, "data_vars": {"alpha": {"dims": ["iter", "suggestion"], "attrs": {}, "data": [[73.81273847933892], [3.780332238578576], [3.780332238578576], [3.780332238578576], [14.35211115621627], [1.2547424104896476], [1.2547424104896476], [2.5403569473451686], [11.442375226309894], [1.2547424104896476], [29.889738440144367], [1.2547424104896476], [0.27931406081761634], [0.7701209514892378], [1.445584700406051], [6.145630230222077], [3.2151762079627098], [0.7701209514892378], [4.5477487681242685], [0.5074033137050054]]}, "fit_intercept": {"dims": ["iter", "suggestion"], "attrs": {}, "data": [[1], [0], [0], [1], [1], [0], [0], [0], [0], [0], [0], [0], [0], [0], [0], [0], [1], [0], [0], [0]]}, "max_iter": {"dims": ["iter", "suggestion"], "attrs": {}, "data": [[45], [21], [21], [21], [10], [21], [21], [18], [61], [21], [21], [21], [68], [59], [326], [15], [103], [59], [58], [27]]}, "normalize": {"dims": ["iter", "suggestion"], "attrs": {}, "data": [[0], [1], [1], [1], [0], [1], [1], [0], [0], [1], [1], [1], [1], [1], [1], [0], [1], [0], [1], [1]]}, "positive": {"dims": ["iter", "suggestion"], "attrs": {}, "data": [[0], [0], [0], [0], [1], [0], [1], [1], [0], [0], [0], [0], [1], [0], [0], [0], [0], [0], [1], [0]]}, "tol": {"dims": ["iter", "suggestion"], "attrs": {}, "data": [[0.0645428051786942], [0.03142189395842159], [0.048880861001218294], [0.03142189395842159], [0.06454536564909057], [0.03142189395842159], [0.04424446762081285], [0.06609608395642945], [0.06250387142112672], [0.03221136114426575], [0.03142189395842159], [0.07646214963322599], [0.04619785278391591], [0.0334907301254747], [0.02768484697694167], [0.012036026949675472], [0.04018922900096216], [0.0334907301254747], [0.0742959929399362], [0.03561727247726581]]}}}}
