# Supplementary material
Source: ML conference proceedings conference paper supplement (https://proceedings.neurips.cc/paper_files/paper/2022/hash/31a57804448363bcab777f818f75f5b4-Abstract.html)
Supplement: Supplementary file 1 [file 31a57804448363bcab777f818f75f5b4-Supplemental-Conference.zip › trading_off_resource_budgets_f-Supplementary Material/code_and_data/experiments/base_results/bo_20220228_124924_b7rkpeqg/suggest_log/08e584db1e3b5fc08bbb625f239a1575.json]

{"meta": {"args": {"--uuid": "08e584db1e3b5fc08bbb625f239a1575", "-db-root": "/home/damon_falck/blackboxbandits/experiments/saved_results", "--opt-root": "/home/damon_falck/blackboxbandits/experiments", "--data-root": "/home/damon_falck/blackboxbandits/experiments/penn_datasets", "--db": "bo_20220228_124924_b7rkpeqg", "--opt": "OpenTuner-BanditA", "--data": "reg-1030-ERA", "--classifier": "lasso", "--metric": "mse", "--calls": 20, "--suggestions": 1, "--jobs-file": null, "--verbose": false, "dry_run": false, "rev": "bd14afd", "opt_rev": "0.8.7"}, "signature": [[{"alpha": 1.5676677195506077, "fit_intercept": true, "max_iter": 423, "normalize": true, "positive": false, "tol": 0.0038333321561566623}, {"alpha": 0.5627932047415171, "fit_intercept": true, "max_iter": 3989, "normalize": false, "positive": true, "tol": 0.001304907355036239}, {"alpha": 1.871450068624068, "fit_intercept": true, "max_iter": 16, "normalize": false, "positive": false, "tol": 0.021403233140986057}, {"alpha": 12.960656597279737, "fit_intercept": true, "max_iter": 4378, "normalize": true, "positive": false, "tol": 0.013246974647468445}, {"alpha": 0.029723346443356558, "fit_intercept": true, "max_iter": 24, "normalize": true, "positive": true, "tol": 0.00045566719139214756}], [0.9480668507324097, 0.9480668507324097, 0.9480668507324097, 0.9480668507324097, 0.9480668507324097]]},
"data": {"coords": {"iter": {"dims": ["iter"], "attrs": {}, "data": [0, 1, 2, 3, 4, 5, 6, 7, 8, 9, 10, 11, 12, 13, 14, 15, 16, 17, 18, 19]}, "suggestion": {"dims": ["suggestion"], "attrs": {}, "data": [0]}}, "attrs": {}, "dims": {"iter": 20, "suggestion": 1}, "data_vars": {"alpha": {"dims": ["iter", "suggestion"], "attrs": {}, "data": [[0.2474136498719346], [0.2474136498719346], [0.2474136498719346], [29.276516253223242], [73.58364289647844], [0.2474136498719346], [3.3433467237799803], [1.0129920721709589], [0.2474136498719346], [0.2474136498719346], [0.2474136498719346], [0.2474136498719346], [1.3669523495418463], [0.4436588180703578], [6.549953475004988], [2.59680520005485], [0.06289864358980933], [6.441792230397434], [37.322160959352125], [28.771858747838106]]}, "fit_intercept": {"dims": ["iter", "suggestion"], "attrs": {}, "data": [[0], [0], [0], [0], [0], [0], [0], [0], [1], [1], [0], [1], [1], [0], [1], [1], [0], [1], [0], [0]]}, "max_iter": {"dims": ["iter", "suggestion"], "attrs": {}, "data": [[67], [11], [11], [4484], [11], [14], [11], [11], [11], [11], [11], [11], [11], [10], [10], [11], [54], [30], [10], [671]]}, "normalize": {"dims": ["iter", "suggestion"], "attrs": {}, "data": [[0], [0], [0], [0], [0], [0], [0], [0], [0], [0], [1], [0], [0], [0], [0], [0], [0], [0], [1], [0]]}, "positive": {"dims": ["iter", "suggestion"], "attrs": {}, "data": [[1], [1], [1], [0], [1], [1], [0], [1], [1], [1], [1], [0], [1], [1], [1], [1], [0], [1], [1], [1]]}, "tol": {"dims": ["iter", "suggestion"], "attrs": {}, "data": [[0.06488772906569167], [0.04434856076932119], [0.03734357246917746], [0.08774835622368908], [0.03734357246917746], [0.03734357246917746], [0.075570775886083], [0.03734357246917746], [0.03734357246917746], [0.045054280820887964], [0.045054280820887964], [0.045054280820887964], [0.045054280820887964], [0.003648613828250481], [0.045054280820887964], [0.045054280820887964], [0.02807787179254022], [0.07226168706009799], [0.04015652467565361], [0.004504613749344456]]}}}}
