# Supplementary material
Source: ML conference proceedings conference paper supplement (https://proceedings.neurips.cc/paper_files/paper/2022/hash/31a57804448363bcab777f818f75f5b4-Abstract.html)
Supplement: Supplementary file 1 [file 31a57804448363bcab777f818f75f5b4-Supplemental-Conference.zip › trading_off_resource_budgets_f-Supplementary Material/code_and_data/experiments/base_results/bo_20220228_124924_b7rkpeqg/suggest_log/08f2b2e4c3a35b6bbd049a79816becae.json]

{"meta": {"args": {"--uuid": "08f2b2e4c3a35b6bbd049a79816becae", "-db-root": "/home/damon_falck/blackboxbandits/experiments/saved_results", "--opt-root": "/home/damon_falck/blackboxbandits/experiments", "--data-root": "/home/damon_falck/blackboxbandits/experiments/penn_datasets", "--db": "bo_20220228_124924_b7rkpeqg", "--opt": "Scikit-GP-LCB", "--data": "clf-house-votes-84", "--classifier": "MLP-adam", "--metric": "nll", "--calls": 20, "--suggestions": 1, "--jobs-file": null, "--verbose": false, "dry_run": false, "rev": "bd14afd", "opt_rev": "0.9.0"}, "signature": [[{"alpha": 0.019628224813442792, "batch_size": 182, "beta_1": 0.9410202200271762, "beta_2": 0.9998021557676793, "epsilon": 1.8662266976518e-08, "hidden_layer_sizes": 147, "learning_rate_init": 0.0005627932047415167, "tol": 0.03690557729213761, "validation_fraction": 0.8846827852548593}, {"alpha": 0.001998246739232944, "batch_size": 200, "beta_1": 0.919111482530466, "beta_2": 0.9998488260436156, "epsilon": 5.981221901152555e-07, "hidden_layer_sizes": 61, "learning_rate_init": 2.2310905607443014e-05, "tol": 1.2046852412030316e-05, "validation_fraction": 0.8117896445826539}, {"alpha": 0.46659545670218433, "batch_size": 219, "beta_1": 0.9889789783750891, "beta_2": 0.9999896868093284, "epsilon": 2.4234724484675948e-08, "hidden_layer_sizes": 167, "learning_rate_init": 2.972334644335654e-05, "tol": 0.0036281404040243792, "validation_fraction": 0.17260651658522078}, {"alpha": 4.656005689076002, "batch_size": 135, "beta_1": 0.870503881627747, "beta_2": 0.9948873266941017, "epsilon": 2.1023308743480125e-07, "hidden_layer_sizes": 118, "learning_rate_init": 0.001878173875716191, "tol": 1.1889379831773006e-05, "validation_fraction": 0.6264327093752792}, {"alpha": 0.04705159350400542, "batch_size": 158, "beta_1": 0.9870884262730957, "beta_2": 0.9999596874382349, "epsilon": 1.1981845126013875e-08, "hidden_layer_sizes": 116, "learning_rate_init": 0.006173405204074311, "tol": 1.7414134181586194e-05, "validation_fraction": 0.6754299026638921}], [0.3362631093703162, 0.7686453687065804, 0.7684608146302375, 0.1508740620059309, 0.18793941568969483]]},
"data": {"coords": {"iter": {"dims": ["iter"], "attrs": {}, "data": [0, 1, 2, 3, 4, 5, 6, 7, 8, 9, 10, 11, 12, 13, 14, 15, 16, 17, 18, 19]}, "suggestion": {"dims": ["suggestion"], "attrs": {}, "data": [0]}}, "attrs": {}, "dims": {"iter": 20, "suggestion": 1}, "data_vars": {"alpha": {"dims": ["iter", "suggestion"], "attrs": {}, "data": [[5.1062526907687245], [0.0962447595687456], [0.00015142645056557302], [0.7866591000159204], [1.079448208432502], [10.0], [1e-05], [0.5771538312795761], [10.0], [10.0], [10.0], [0.5962395332125363], [4.423274362008867], [3.0631948482272775], [0.19338766659714093], [0.6475512038816299], [1.3021119597550246], [0.0013018613101553164], [2.1775777690691068e-05], [1e-05]]}, "batch_size": {"dims": ["iter", "suggestion"], "attrs": {}, "data": [[85], [60], [92], [14], [209], [10], [66], [20], [185], [10], [250], [232], [10], [49], [103], [40], [27], [156], [151], [72]]}, "beta_1": {"dims": ["iter", "suggestion"], "attrs": {}, "data": [[0.9562213984556026], [0.915816770897454], [0.8985852939692582], [0.8679567788414286], [0.726264823412437], [0.5], [0.5], [0.9228423765817922], [0.8248018004129981], [0.99], [0.5], [0.9416194209356455], [0.99], [0.7810940755592152], [0.855938701419478], [0.841327978563909], [0.99], [0.7693826260949103], [0.940414233202025], [0.5]]}, "beta_2": {"dims": ["iter", "suggestion"], "attrs": {}, "data": [[0.9359661419317813], [0.9035052041630225], [0.9110597916895141], [0.9204820494576678], [0.9406285094731441], [0.999999], [0.9821587893951343], [0.9578924457948177], [0.9437275657591931], [0.9616754959647378], [0.9], [0.9323196552467653], [0.9385744629206577], [0.9823255222763584], [0.9230702515208675], [0.9376741375970464], [0.9848639965037831], [0.9058692556099459], [0.943940548048524], [0.9]]}, "epsilon": {"dims": ["iter", "suggestion"], "attrs": {}, "data": [[1.0511882633147998e-09], [8.40868740494859e-07], [4.1518969065370594e-09], [6.863429887994061e-08], [1.962682078893764e-09], [1e-06], [3.879925270925289e-09], [6.236254398655549e-07], [3.3061782844769925e-07], [1.9846386250626446e-08], [1e-06], [1e-09], [2.967439434585147e-09], [2.1241082300888045e-07], [1.5416735690262181e-07], [1.4395986432554198e-09], [2.5560329317109804e-09], [2.614093264925095e-07], [7.626884883846534e-08], [8.085338102432278e-09]]}, "hidden_layer_sizes": {"dims": ["iter", "suggestion"], "attrs": {}, "data": [[126], [135], [171], [197], [179], [200], [75], [125], [84], [200], [50], [50], [179], [147], [101], [126], [196], [92], [136], [88]]}, "learning_rate_init": {"dims": ["iter", "suggestion"], "attrs": {}, "data": [[0.003666169071509277], [0.04296053372115232], [0.00010605023290405545], [0.01906877832870589], [0.0003510451928892445], [0.1], [0.1], [1e-05], [0.1], [0.08623729774813645], [0.1], [0.1], [0.0059536584703279456], [0.1], [0.046317949727584413], [0.008353405842704388], [0.1], [0.005583973721936482], [0.1], [1e-05]]}, "tol": {"dims": ["iter", "suggestion"], "attrs": {}, "data": [[0.00029540293658310995], [0.0046564538735809095], [0.00029176450652121746], [7.746045253309648e-05], [0.005132149881868878], [0.1], [0.0013559187929097932], [5.731304664059722e-05], [1.0850381558616814e-05], [6.861857996200903e-05], [1e-05], [0.001372956553042084], [2.7754380554153574e-05], [0.0022757159595962573], [9.381120109315457e-05], [4.283550557258705e-05], [0.009201482556455868], [0.0005823725052240715], [0.07555758179599509], [0.06775626024706068]]}, "validation_fraction": {"dims": ["iter", "suggestion"], "attrs": {}, "data": [[0.5267552387088542], [0.42331751495995756], [0.20744983080099408], [0.261133034513181], [0.1356078785487283], [0.1], [0.6412288093381325], [0.20560523285823637], [0.10505677406723372], [0.1], [0.1], [0.863529104867076], [0.3924770136235643], [0.28217148357289823], [0.20012062907000358], [0.5110707520754031], [0.22337020335188004], [0.2888689928724119], [0.8412977630038186], [0.17855067173831426]]}}}}
