# Supplementary material
Source: ML conference proceedings conference paper supplement (https://proceedings.neurips.cc/paper_files/paper/2022/hash/31a57804448363bcab777f818f75f5b4-Abstract.html)
Supplement: Supplementary file 1 [file 31a57804448363bcab777f818f75f5b4-Supplemental-Conference.zip › trading_off_resource_budgets_f-Supplementary Material/code_and_data/experiments/base_results/bo_20220228_124924_b7rkpeqg/suggest_log/08f2d012726651cdb033fe409eeb35c7.json]

{"meta": {"args": {"--uuid": "08f2d012726651cdb033fe409eeb35c7", "-db-root": "/home/damon_falck/blackboxbandits/experiments/saved_results", "--opt-root": "/home/damon_falck/blackboxbandits/experiments", "--data-root": "/home/damon_falck/blackboxbandits/experiments/penn_datasets", "--db": "bo_20220228_124924_b7rkpeqg", "--opt": "Scikit-GP-Hedge", "--data": "clf-glass", "--classifier": "lasso", "--metric": "nll", "--calls": 20, "--suggestions": 1, "--jobs-file": null, "--verbose": false, "dry_run": false, "rev": "bd14afd", "opt_rev": "0.9.0"}, "signature": [[{"C": 1.5676677195506077, "intercept_scaling": 7.257005721594282}, {"C": 2.57663857461359, "intercept_scaling": 1.5119336467641016}, {"C": 0.49501595537331966, "intercept_scaling": 3.833332156156665}, {"C": 0.5627932047415171, "intercept_scaling": 36.905577292137636}, {"C": 71.55682161754872, "intercept_scaling": 0.34179529120610125}], [1.115318188691054, 1.1548989764248454, 1.0476235637328195, 1.0442748975267364, 1.3315989493470173]]},
"data": {"coords": {"iter": {"dims": ["iter"], "attrs": {}, "data": [0, 1, 2, 3, 4, 5, 6, 7, 8, 9, 10, 11, 12, 13, 14, 15, 16, 17, 18, 19]}, "suggestion": {"dims": ["suggestion"], "attrs": {}, "data": [0]}}, "attrs": {}, "dims": {"iter": 20, "suggestion": 1}, "data_vars": {"C": {"dims": ["iter", "suggestion"], "attrs": {}, "data": [[0.9495359329902896], [0.6199643335330063], [0.5400660283556115], [4.279222742742275], [0.010351629697275638], [100.0], [0.9500378869627837], [0.14442088649124166], [0.24652173483072354], [100.0], [0.38696986935950684], [0.33774680994856565], [5.2610605402778114], [0.010358382248551156], [0.33277473832291316], [0.5044755454074618], [0.21136209932912198], [0.4941447824882067], [97.82274814166794], [0.9941511700048044]]}, "intercept_scaling": {"dims": ["iter", "suggestion"], "attrs": {}, "data": [[0.28257612633886264], [8.741172075573923], [16.129837908263138], [0.9593817606833129], [5.786572536882656], [100.0], [100.0], [100.0], [0.01], [0.01], [100.0], [7.847766419478858], [0.010117786968933213], [0.010621160255955359], [34.644785084574664], [2.3934396622164105], [1.1445343899105578], [9.715367405834321], [0.8002230371818603], [3.5533100109038065]]}}}}
