# Supplementary material
Source: ML conference proceedings conference paper supplement (https://proceedings.neurips.cc/paper_files/paper/2022/hash/31a57804448363bcab777f818f75f5b4-Abstract.html)
Supplement: Supplementary file 1 [file 31a57804448363bcab777f818f75f5b4-Supplemental-Conference.zip › trading_off_resource_budgets_f-Supplementary Material/code_and_data/experiments/base_results/bo_20220228_124924_b7rkpeqg/suggest_log/09a0b444d4925d0ca3efabf542bb1817.json]

{"meta": {"args": {"--uuid": "09a0b444d4925d0ca3efabf542bb1817", "-db-root": "/home/damon_falck/blackboxbandits/experiments/saved_results", "--opt-root": "/home/damon_falck/blackboxbandits/experiments", "--data-root": "/home/damon_falck/blackboxbandits/experiments/penn_datasets", "--db": "bo_20220228_124924_b7rkpeqg", "--opt": "Scikit-GBRT-Hedge", "--data": "clf-allbp", "--classifier": "MLP-adam", "--metric": "nll", "--calls": 20, "--suggestions": 1, "--jobs-file": null, "--verbose": false, "dry_run": false, "rev": "bd14afd", "opt_rev": "0.9.0"}, "signature": [[{"alpha": 0.019628224813442792, "batch_size": 182, "beta_1": 0.9410202200271762, "beta_2": 0.9998021557676793, "epsilon": 1.8662266976518e-08, "hidden_layer_sizes": 147, "learning_rate_init": 0.0005627932047415167, "tol": 0.03690557729213761, "validation_fraction": 0.8846827852548593}, {"alpha": 0.001998246739232944, "batch_size": 200, "beta_1": 0.919111482530466, "beta_2": 0.9998488260436156, "epsilon": 5.981221901152555e-07, "hidden_layer_sizes": 61, "learning_rate_init": 2.2310905607443014e-05, "tol": 1.2046852412030316e-05, "validation_fraction": 0.8117896445826539}, {"alpha": 0.46659545670218433, "batch_size": 219, "beta_1": 0.9889789783750891, "beta_2": 0.9999896868093284, "epsilon": 2.4234724484675948e-08, "hidden_layer_sizes": 167, "learning_rate_init": 2.972334644335654e-05, "tol": 0.0036281404040243792, "validation_fraction": 0.17260651658522078}, {"alpha": 4.656005689076002, "batch_size": 135, "beta_1": 0.870503881627747, "beta_2": 0.9948873266941017, "epsilon": 2.1023308743480125e-07, "hidden_layer_sizes": 118, "learning_rate_init": 0.001878173875716191, "tol": 1.1889379831773006e-05, "validation_fraction": 0.6264327093752792}, {"alpha": 0.04705159350400542, "batch_size": 158, "beta_1": 0.9870884262730957, "beta_2": 0.9999596874382349, "epsilon": 1.1981845126013875e-08, "hidden_layer_sizes": 116, "learning_rate_init": 0.006173405204074311, "tol": 1.7414134181586194e-05, "validation_fraction": 0.6754299026638921}], [0.3612421110270184, 0.543948901412961, 0.4544706240802331, 0.14380893424197033, 0.2868956398212156]]},
"data": {"coords": {"iter": {"dims": ["iter"], "attrs": {}, "data": [0, 1, 2, 3, 4, 5, 6, 7, 8, 9, 10, 11, 12, 13, 14, 15, 16, 17, 18, 19]}, "suggestion": {"dims": ["suggestion"], "attrs": {}, "data": [0]}}, "attrs": {}, "dims": {"iter": 20, "suggestion": 1}, "data_vars": {"alpha": {"dims": ["iter", "suggestion"], "attrs": {}, "data": [[0.01765491671030257], [0.002588739647301873], [0.00012961594543354398], [5.839195899380267], [0.00010922496211737527], [2.3089895945191354e-05], [1.843805241427358], [1.9805381430113127], [0.0543196999260783], [6.539348979301753], [0.6682692650485033], [7.210926050393747e-05], [0.07670944816339131], [0.049582412834664906], [0.008153738016987055], [0.0011272555406681897], [0.44003098925576484], [0.3427652311614799], [0.0006754163773744277], [9.59270756702897]]}, "batch_size": {"dims": ["iter", "suggestion"], "attrs": {}, "data": [[61], [76], [156], [205], [235], [236], [244], [248], [214], [17], [115], [176], [175], [101], [135], [73], [68], [104], [13], [213]]}, "beta_1": {"dims": ["iter", "suggestion"], "attrs": {}, "data": [[0.5939619902882657], [0.5326316275610953], [0.7652344559343394], [0.555427309972872], [0.9553233688472947], [0.5133885459878332], [0.7717928274984918], [0.7954770725424958], [0.5208953048787888], [0.7761500008906036], [0.5763432655128414], [0.600804370879689], [0.5007356676185335], [0.5388560292951476], [0.6708414961885597], [0.6681444699766812], [0.5474543103901982], [0.9818813336948399], [0.746132966729043], [0.6585200938328863]]}, "beta_2": {"dims": ["iter", "suggestion"], "attrs": {}, "data": [[0.9058502577335391], [0.9911869378153855], [0.9008808144426631], [0.9867915722333382], [0.9156460298353336], [0.9755740157878442], [0.9857458499084857], [0.9988855253878275], [0.9870947801640805], [0.9502973629528294], [0.989779373363434], [0.9389082641556245], [0.9989226772286611], [0.9424838147926574], [0.9902829156737079], [0.9926082796496375], [0.9873611255654205], [0.988211447742645], [0.990122740518573], [0.9887406227947224]]}, "epsilon": {"dims": ["iter", "suggestion"], "attrs": {}, "data": [[5.440659637028739e-07], [4.567277481410237e-09], [4.927673021940363e-09], [9.87184109438783e-08], [5.956692924483209e-08], [2.292510727696723e-08], [6.741775775767452e-07], [6.348200626020789e-07], [5.750002815973958e-08], [9.83455946112806e-07], [7.28681378197506e-08], [8.931220598746577e-07], [1.362625083747549e-08], [1.0776340804627374e-09], [1.158575331584018e-07], [9.970857346008732e-07], [5.9593017634034064e-08], [7.754310003283427e-08], [2.3175246438026076e-07], [5.2243063137665595e-09]]}, "hidden_layer_sizes": {"dims": ["iter", "suggestion"], "attrs": {}, "data": [[192], [121], [108], [166], [188], [174], [66], [84], [61], [60], [101], [200], [182], [166], [121], [100], [172], [135], [105], [118]]}, "learning_rate_init": {"dims": ["iter", "suggestion"], "attrs": {}, "data": [[0.07388665881600105], [0.013662898564434976], [0.00940819987421132], [0.0025142458115750208], [0.0003097124006926077], [9.797914029889387e-05], [1.2703340994273672e-05], [0.00011310640460408206], [0.051459253269536195], [2.8724831233987923e-05], [0.002905572613583026], [1.5937938298801883e-05], [1.3787148297503846e-05], [1.143588044192701e-05], [0.0029188716419231604], [0.002511906814701159], [0.0014574029446931883], [0.002120647732556677], [0.0021799987616929243], [0.0035623236408625475]]}, "tol": {"dims": ["iter", "suggestion"], "attrs": {}, "data": [[0.006124661940767974], [0.02250972578579048], [4.1304037713137636e-05], [0.006175133047393229], [0.00037023802372027266], [0.04607766705483604], [0.0417832282759402], [1.7370334147226027e-05], [0.020548040633052867], [0.006822149781065611], [0.05543064441701513], [0.0006335796306191665], [0.053033309469677894], [0.014989997081884596], [0.08600388134947295], [0.07185053006701612], [0.05953903910415249], [0.07641314224550953], [0.06867718801900477], [0.08322002489567526]]}, "validation_fraction": {"dims": ["iter", "suggestion"], "attrs": {}, "data": [[0.4884026043923947], [0.21266251775519365], [0.1898013436994632], [0.1146422757331313], [0.1752700678654215], [0.3833896625827916], [0.12793487550385568], [0.41998459576748176], [0.19022066300826715], [0.16868100371665748], [0.10772564423989384], [0.10905972325030829], [0.3826647926825785], [0.10090523972414421], [0.10839091258391467], [0.10818006979398134], [0.15695315160489587], [0.12234517190393451], [0.31157068184974956], [0.1065605219735868]]}}}}
