# Supplementary material
Source: ML conference proceedings conference paper supplement (https://proceedings.neurips.cc/paper_files/paper/2022/hash/31a57804448363bcab777f818f75f5b4-Abstract.html)
Supplement: Supplementary file 1 [file 31a57804448363bcab777f818f75f5b4-Supplemental-Conference.zip › trading_off_resource_budgets_f-Supplementary Material/code_and_data/experiments/base_results/bo_20220228_124924_b7rkpeqg/suggest_log/09be4d4111ac57c3890f6565a9f7a5c5.json]

{"meta": {"args": {"--uuid": "09be4d4111ac57c3890f6565a9f7a5c5", "-db-root": "/home/damon_falck/blackboxbandits/experiments/saved_results", "--opt-root": "/home/damon_falck/blackboxbandits/experiments", "--data-root": "/home/damon_falck/blackboxbandits/experiments/penn_datasets", "--db": "bo_20220228_124924_b7rkpeqg", "--opt": "OpenTuner-GA", "--data": "reg-654-fri-c0-500-10", "--classifier": "lasso", "--metric": "mse", "--calls": 20, "--suggestions": 1, "--jobs-file": null, "--verbose": false, "dry_run": false, "rev": "bd14afd", "opt_rev": "0.8.7"}, "signature": [[{"alpha": 1.5676677195506077, "fit_intercept": true, "max_iter": 423, "normalize": true, "positive": false, "tol": 0.0038333321561566623}, {"alpha": 0.5627932047415171, "fit_intercept": true, "max_iter": 3989, "normalize": false, "positive": true, "tol": 0.001304907355036239}, {"alpha": 1.871450068624068, "fit_intercept": true, "max_iter": 16, "normalize": false, "positive": false, "tol": 0.021403233140986057}, {"alpha": 12.960656597279737, "fit_intercept": true, "max_iter": 4378, "normalize": true, "positive": false, "tol": 0.013246974647468445}, {"alpha": 0.029723346443356558, "fit_intercept": true, "max_iter": 24, "normalize": true, "positive": true, "tol": 0.00045566719139214756}], [0.9281670540542855, 0.9281670540542855, 0.9281670540542855, 0.9281670540542855, 0.9220759747130204]]},
"data": {"coords": {"iter": {"dims": ["iter"], "attrs": {}, "data": [0, 1, 2, 3, 4, 5, 6, 7, 8, 9, 10, 11, 12, 13, 14, 15, 16, 17, 18, 19]}, "suggestion": {"dims": ["suggestion"], "attrs": {}, "data": [0]}}, "attrs": {}, "dims": {"iter": 20, "suggestion": 1}, "data_vars": {"alpha": {"dims": ["iter", "suggestion"], "attrs": {}, "data": [[85.76682080385481], [28.504105505217698], [85.76682080385481], [87.05168641434365], [85.76682080385481], [0.47583524535145494], [57.311587148964875], [0.47583524535145494], [0.47583524535145494], [2.4389851539242944], [0.47583524535145494], [7.647534592302556], [1.9030831842177152], [25.328301157687825], [3.8523813180249276], [9.90484040538979], [39.1039913523763], [3.3669739627793183], [20.633108768991768], [23.232175052921892]]}, "fit_intercept": {"dims": ["iter", "suggestion"], "attrs": {}, "data": [[0], [1], [0], [1], [1], [0], [1], [0], [0], [0], [0], [1], [1], [1], [1], [0], [1], [0], [0], [1]]}, "max_iter": {"dims": ["iter", "suggestion"], "attrs": {}, "data": [[4645], [198], [70], [10], [4645], [74], [69], [74], [10], [74], [74], [4990], [11], [10], [10], [39], [10], [12], [12], [1902]]}, "normalize": {"dims": ["iter", "suggestion"], "attrs": {}, "data": [[1], [0], [1], [0], [1], [0], [1], [1], [0], [0], [0], [1], [1], [1], [0], [1], [1], [0], [0], [0]]}, "positive": {"dims": ["iter", "suggestion"], "attrs": {}, "data": [[1], [0], [1], [0], [1], [0], [0], [0], [0], [0], [1], [1], [1], [0], [1], [0], [1], [0], [0], [1]]}, "tol": {"dims": ["iter", "suggestion"], "attrs": {}, "data": [[0.056637994971333754], [0.08512373470571359], [0.056637994971333754], [0.025451528175703664], [0.056637994971333754], [0.0687991277939423], [0.06851789161480097], [0.0687991277939423], [0.0687991277939423], [0.0687991277939423], [0.0687991277939423], [0.07606940890363705], [0.09184041170973416], [0.08606468662725868], [0.023873703454108264], [0.02708269034705173], [0.04808817993053321], [0.07594732077610915], [0.0906233444011814], [0.04461814410980918]]}}}}
