# Supplementary material
Source: ML conference proceedings conference paper supplement (https://proceedings.neurips.cc/paper_files/paper/2022/hash/31a57804448363bcab777f818f75f5b4-Abstract.html)
Supplement: Supplementary file 1 [file 31a57804448363bcab777f818f75f5b4-Supplemental-Conference.zip › trading_off_resource_budgets_f-Supplementary Material/code_and_data/experiments/base_results/bo_20220228_124924_b7rkpeqg/suggest_log/09f129e99fe65615bc224db0bf8d3cfc.json]

{"meta": {"args": {"--uuid": "09f129e99fe65615bc224db0bf8d3cfc", "-db-root": "/home/damon_falck/blackboxbandits/experiments/saved_results", "--opt-root": "/home/damon_falck/blackboxbandits/experiments", "--data-root": "/home/damon_falck/blackboxbandits/experiments/penn_datasets", "--db": "bo_20220228_124924_b7rkpeqg", "--opt": "OpenTuner-GA-DE", "--data": "clf-GAMETES-Heterogeneity-20atts-1600-Het-0.4-0.2-75-EDM-2-001", "--classifier": "lasso", "--metric": "nll", "--calls": 20, "--suggestions": 1, "--jobs-file": null, "--verbose": false, "dry_run": false, "rev": "bd14afd", "opt_rev": "0.8.7"}, "signature": [[{"C": 1.5676677195506077, "intercept_scaling": 7.257005721594282}, {"C": 2.57663857461359, "intercept_scaling": 1.5119336467641016}, {"C": 0.49501595537331966, "intercept_scaling": 3.833332156156665}, {"C": 0.5627932047415171, "intercept_scaling": 36.905577292137636}, {"C": 71.55682161754872, "intercept_scaling": 0.34179529120610125}], [0.7225577557142013, 0.7234616744317967, 0.717480077666816, 0.7185843168727682, 0.7253340838103217]]},
"data": {"coords": {"iter": {"dims": ["iter"], "attrs": {}, "data": [0, 1, 2, 3, 4, 5, 6, 7, 8, 9, 10, 11, 12, 13, 14, 15, 16, 17, 18, 19]}, "suggestion": {"dims": ["suggestion"], "attrs": {}, "data": [0]}}, "attrs": {}, "dims": {"iter": 20, "suggestion": 1}, "data_vars": {"C": {"dims": ["iter", "suggestion"], "attrs": {}, "data": [[26.489183100548125], [22.413641545495295], [33.23697087277127], [6.943421615685313], [19.147112516100474], [6.943421615685313], [0.7137245439285675], [4.528413044210495], [1.3422544043362887], [10.273030692234542], [4.507520695290471], [0.1250869527986629], [0.9964174944937649], [4.449738280679744], [0.9160126012531962], [35.22576553760984], [12.982697484509366], [0.1250869527986629], [5.359898895622546], [2.637055033672639]]}, "intercept_scaling": {"dims": ["iter", "suggestion"], "attrs": {}, "data": [[3.0947396131171354], [4.635885028800415], [3.6320198102650796], [0.7708322221327304], [5.700779567601226], [84.58932409136072], [10.425643701158345], [10.425643701158345], [2.6275369555553403], [43.729637701070175], [26.87090497770909], [10.425643701158345], [10.425643701158345], [2.639303211858504], [5.174910870770288], [0.8492532352706237], [0.5857258095499818], [1.8513480059692833], [1.8513480059692833], [1.8513480059692833]]}}}}
