# Supplementary material
Source: ML conference proceedings conference paper supplement (https://proceedings.neurips.cc/paper_files/paper/2022/hash/31a57804448363bcab777f818f75f5b4-Abstract.html)
Supplement: Supplementary file 1 [file 31a57804448363bcab777f818f75f5b4-Supplemental-Conference.zip › trading_off_resource_budgets_f-Supplementary Material/code_and_data/experiments/base_results/bo_20220228_124924_b7rkpeqg/suggest_log/016a5a85decf55f4b1519a88c057c656.json]

{"meta": {"args": {"--uuid": "016a5a85decf55f4b1519a88c057c656", "-db-root": "/home/damon_falck/blackboxbandits/experiments/saved_results", "--opt-root": "/home/damon_falck/blackboxbandits/experiments", "--data-root": "/home/damon_falck/blackboxbandits/experiments/penn_datasets", "--db": "bo_20220228_124924_b7rkpeqg", "--opt": "OpenTuner-GA-DE", "--data": "reg-650-fri-c0-500-50", "--classifier": "MLP-adam", "--metric": "mse", "--calls": 20, "--suggestions": 1, "--jobs-file": null, "--verbose": false, "dry_run": false, "rev": "bd14afd", "opt_rev": "0.8.7"}, "signature": [[{"alpha": 0.019628224813442792, "batch_size": 182, "beta_1": 0.9410202200271762, "beta_2": 0.9998021557676793, "epsilon": 1.8662266976518e-08, "hidden_layer_sizes": 147, "learning_rate_init": 0.0005627932047415167, "tol": 0.03690557729213761, "validation_fraction": 0.8846827852548593}, {"alpha": 0.001998246739232944, "batch_size": 200, "beta_1": 0.919111482530466, "beta_2": 0.9998488260436156, "epsilon": 5.981221901152555e-07, "hidden_layer_sizes": 61, "learning_rate_init": 2.2310905607443014e-05, "tol": 1.2046852412030316e-05, "validation_fraction": 0.8117896445826539}, {"alpha": 0.46659545670218433, "batch_size": 219, "beta_1": 0.9889789783750891, "beta_2": 0.9999896868093284, "epsilon": 2.4234724484675948e-08, "hidden_layer_sizes": 167, "learning_rate_init": 2.972334644335654e-05, "tol": 0.0036281404040243792, "validation_fraction": 0.17260651658522078}, {"alpha": 4.656005689076002, "batch_size": 135, "beta_1": 0.870503881627747, "beta_2": 0.9948873266941017, "epsilon": 2.1023308743480125e-07, "hidden_layer_sizes": 118, "learning_rate_init": 0.001878173875716191, "tol": 1.1889379831773006e-05, "validation_fraction": 0.6264327093752792}, {"alpha": 0.04705159350400542, "batch_size": 158, "beta_1": 0.9870884262730957, "beta_2": 0.9999596874382349, "epsilon": 1.1981845126013875e-08, "hidden_layer_sizes": 116, "learning_rate_init": 0.006173405204074311, "tol": 1.7414134181586194e-05, "validation_fraction": 0.6754299026638921}], [1.1570719405984589, 1.9551017609998684, 1.1780576433283738, 0.36803124133846976, 0.5214639989335306]]},
"data": {"coords": {"iter": {"dims": ["iter"], "attrs": {}, "data": [0, 1, 2, 3, 4, 5, 6, 7, 8, 9, 10, 11, 12, 13, 14, 15, 16, 17, 18, 19]}, "suggestion": {"dims": ["suggestion"], "attrs": {}, "data": [0]}}, "attrs": {}, "dims": {"iter": 20, "suggestion": 1}, "data_vars": {"alpha": {"dims": ["iter", "suggestion"], "attrs": {}, "data": [[0.8986307703253299], [3.981887837021191], [3.981887837021191], [4.134845313922813], [1.94680605810618], [1.94680605810618], [4.723423973225295], [1.94680605810618], [0.5990575172467093], [1.94680605810618], [4.145543781301565], [0.7092906470979884], [0.48963021953316516], [9.031061455560865], [1.94680605810618], [0.014186704520659999], [0.8183363920922745], [4.75418234627622], [2.349823065615826], [0.6720512891382099]]}, "batch_size": {"dims": ["iter", "suggestion"], "attrs": {}, "data": [[177], [226], [189], [226], [27], [27], [167], [27], [191], [27], [43], [102], [223], [161], [27], [111], [40], [27], [236], [250]]}, "beta_1": {"dims": ["iter", "suggestion"], "attrs": {}, "data": [[0.8380658463597859], [0.5959150038028428], [0.5959150038028428], [0.5959150038028428], [0.8732224102468875], [0.8732224102468875], [0.6671120343894541], [0.8732224102468875], [0.9190851335161996], [0.8732224102468875], [0.5319009739406293], [0.8766057823885298], [0.7407709966028821], [0.5033143848009096], [0.8732224102468875], [0.6376442462989254], [0.8633635140412805], [0.8732224102468875], [0.6684231932235685], [0.620609236882619]]}, "beta_2": {"dims": ["iter", "suggestion"], "attrs": {}, "data": [[0.9602101937877309], [0.9112302830694676], [0.9260367401411526], [0.9058831579005541], [0.9599878255251094], [0.9599878255251094], [0.9452847846470362], [0.9599878255251094], [0.9588342560206471], [0.9542065772660447], [0.9601907588817663], [0.9393060450640232], [0.9743251964568145], [0.9125495915689208], [0.9599878255251094], [0.9739431600601608], [0.9559338665621948], [0.9599878255251094], [0.9030970538811266], [0.9653055236426263]]}, "epsilon": {"dims": ["iter", "suggestion"], "attrs": {}, "data": [[6.706665808547663e-07], [9.691745565259804e-07], [9.691745565259804e-07], [9.691745565259804e-07], [2.4092855771252742e-09], [2.4092855771252742e-09], [2.428670212214945e-08], [2.4092855771252742e-09], [9.504583386171484e-07], [7.652189405743238e-07], [1.4467123690739447e-07], [2.2294840187950148e-07], [1.7961745660319172e-07], [6.643434164426253e-09], [2.4092855771252742e-09], [8.970745003783188e-07], [2.3575758270663504e-07], [2.4092855771252742e-09], [1.9839277790087328e-07], [3.294154936888939e-07]]}, "hidden_layer_sizes": {"dims": ["iter", "suggestion"], "attrs": {}, "data": [[118], [50], [50], [50], [184], [168], [168], [184], [140], [184], [86], [150], [177], [95], [184], [163], [166], [184], [132], [90]]}, "learning_rate_init": {"dims": ["iter", "suggestion"], "attrs": {}, "data": [[0.07784271663585811], [0.04129202406137227], [0.03230921715943918], [0.04129202406137227], [0.08208888761191162], [0.08208888761191162], [0.08899645294837259], [0.08208888761191162], [0.003781121402029065], [0.08208888761191162], [0.08592518606544546], [0.04817486166386858], [0.014157296078510285], [0.004170000018306853], [0.08208888761191162], [0.035718054754816535], [0.033459985508615224], [0.08208888761191162], [0.0984782631068623], [0.0550355894717433]]}, "tol": {"dims": ["iter", "suggestion"], "attrs": {}, "data": [[0.020216348112719707], [0.09619819748876572], [0.09619819748876572], [0.09619819748876572], [0.07434796867574393], [0.07434796867574393], [0.009108276330309351], [0.0912822995590336], [0.03518031203719734], [0.07434796867574393], [0.09333750020216429], [0.0020292095090578732], [0.011958684525262542], [0.05112761256457626], [0.07434796867574393], [0.04160715081393234], [0.061785016915259776], [0.0033110654063259093], [0.0982822461969383], [0.0929414966589081]]}, "validation_fraction": {"dims": ["iter", "suggestion"], "attrs": {}, "data": [[0.7910055750421829], [0.8810664573291466], [0.8810664573291466], [0.5651963211175463], [0.38803512254893413], [0.38803512254893413], [0.5407767890112221], [0.38803512254893413], [0.8297140011402867], [0.7697003545192417], [0.8697700020836627], [0.5295614056166585], [0.5521514328634916], [0.808842774580285], [0.7362730021057738], [0.7801645640375829], [0.4053478809813923], [0.38803512254893413], [0.5831930718368994], [0.1879168881412336]]}}}}
