# Supplementary material
Source: ML conference proceedings conference paper supplement (https://proceedings.neurips.cc/paper_files/paper/2022/hash/31a57804448363bcab777f818f75f5b4-Abstract.html)
Supplement: Supplementary file 1 [file 31a57804448363bcab777f818f75f5b4-Supplemental-Conference.zip › trading_off_resource_budgets_f-Supplementary Material/code_and_data/experiments/base_results/bo_20220228_124924_b7rkpeqg/suggest_log/016b4b3b95ca50bfb246751b51521674.json]

{"meta": {"args": {"--uuid": "016b4b3b95ca50bfb246751b51521674", "-db-root": "/home/damon_falck/blackboxbandits/experiments/saved_results", "--opt-root": "/home/damon_falck/blackboxbandits/experiments", "--data-root": "/home/damon_falck/blackboxbandits/experiments/penn_datasets", "--db": "bo_20220228_124924_b7rkpeqg", "--opt": "OpenTuner-BanditA", "--data": "clf-wine-quality-red", "--classifier": "MLP-adam", "--metric": "nll", "--calls": 20, "--suggestions": 1, "--jobs-file": null, "--verbose": false, "dry_run": false, "rev": "bd14afd", "opt_rev": "0.8.7"}, "signature": [[{"alpha": 0.019628224813442792, "batch_size": 182, "beta_1": 0.9410202200271762, "beta_2": 0.9998021557676793, "epsilon": 1.8662266976518e-08, "hidden_layer_sizes": 147, "learning_rate_init": 0.0005627932047415167, "tol": 0.03690557729213761, "validation_fraction": 0.8846827852548593}, {"alpha": 0.001998246739232944, "batch_size": 200, "beta_1": 0.919111482530466, "beta_2": 0.9998488260436156, "epsilon": 5.981221901152555e-07, "hidden_layer_sizes": 61, "learning_rate_init": 2.2310905607443014e-05, "tol": 1.2046852412030316e-05, "validation_fraction": 0.8117896445826539}, {"alpha": 0.46659545670218433, "batch_size": 219, "beta_1": 0.9889789783750891, "beta_2": 0.9999896868093284, "epsilon": 2.4234724484675948e-08, "hidden_layer_sizes": 167, "learning_rate_init": 2.972334644335654e-05, "tol": 0.0036281404040243792, "validation_fraction": 0.17260651658522078}, {"alpha": 4.656005689076002, "batch_size": 135, "beta_1": 0.870503881627747, "beta_2": 0.9948873266941017, "epsilon": 2.1023308743480125e-07, "hidden_layer_sizes": 118, "learning_rate_init": 0.001878173875716191, "tol": 1.1889379831773006e-05, "validation_fraction": 0.6264327093752792}, {"alpha": 0.04705159350400542, "batch_size": 158, "beta_1": 0.9870884262730957, "beta_2": 0.9999596874382349, "epsilon": 1.1981845126013875e-08, "hidden_layer_sizes": 116, "learning_rate_init": 0.006173405204074311, "tol": 1.7414134181586194e-05, "validation_fraction": 0.6754299026638921}], [1.6893612148072776, 2.0012496951494723, 1.625113973691058, 1.0542823991496857, 1.1127358379972159]]},
"data": {"coords": {"iter": {"dims": ["iter"], "attrs": {}, "data": [0, 1, 2, 3, 4, 5, 6, 7, 8, 9, 10, 11, 12, 13, 14, 15, 16, 17, 18, 19]}, "suggestion": {"dims": ["suggestion"], "attrs": {}, "data": [0]}}, "attrs": {}, "dims": {"iter": 20, "suggestion": 1}, "data_vars": {"alpha": {"dims": ["iter", "suggestion"], "attrs": {}, "data": [[7.962090202581226], [6.304634572192922], [7.962090202581226], [7.681781232807976], [7.962090202581226], [5.231845291096352], [7.962090202581226], [7.962090202581226], [7.962090202581226], [7.962090202581226], [7.962090202581226], [8.22689381530451], [7.962090202581226], [7.962090202581226], [7.962090202581226], [2.476332301427315], [1.6759046462636844], [0.40472587941705734], [8.613470738027303], [7.962090202581226]]}, "batch_size": {"dims": ["iter", "suggestion"], "attrs": {}, "data": [[184], [148], [184], [88], [184], [184], [184], [184], [184], [184], [184], [137], [184], [184], [104], [125], [92], [204], [200], [184]]}, "beta_1": {"dims": ["iter", "suggestion"], "attrs": {}, "data": [[0.6469950129732619], [0.6116523056225593], [0.6469950129732619], [0.5189370885453579], [0.8737540198952243], [0.8737540198952243], [0.8737540198952243], [0.8737540198952243], [0.8737540198952243], [0.7269052833286399], [0.8737540198952243], [0.8737540198952243], [0.8737540198952243], [0.8376400514463229], [0.8737540198952243], [0.6491000267981256], [0.8560273469512765], [0.7719767125743535], [0.8811256146673825], [0.8737540198952243]]}, "beta_2": {"dims": ["iter", "suggestion"], "attrs": {}, "data": [[0.945325732036635], [0.9061588775173709], [0.945325732036635], [0.957268423747897], [0.945325732036635], [0.945325732036635], [0.945325732036635], [0.9550594935980057], [0.945325732036635], [0.945325732036635], [0.9294804333203648], [0.9497266465823001], [0.9006820463374408], [0.945325732036635], [0.945325732036635], [0.9661367356112327], [0.9032745476066198], [0.945325732036635], [0.945325732036635], [0.9903491349225029]]}, "epsilon": {"dims": ["iter", "suggestion"], "attrs": {}, "data": [[2.8936838961154856e-07], [7.576418589455281e-07], [2.8936838961154856e-07], [6.809604650442603e-07], [2.8936838961154856e-07], [2.8936838961154856e-07], [2.8936838961154856e-07], [2.8936838961154856e-07], [2.8936838961154856e-07], [2.8936838961154856e-07], [2.8936838961154856e-07], [2.8936838961154856e-07], [2.8936838961154856e-07], [2.8936838961154856e-07], [2.412177912141923e-07], [9.882730084570237e-07], [4.364554512531195e-07], [2.8936838961154856e-07], [2.8936838961154856e-07], [8.66299017771548e-07]]}, "hidden_layer_sizes": {"dims": ["iter", "suggestion"], "attrs": {}, "data": [[155], [135], [155], [190], [155], [155], [124], [155], [155], [155], [155], [163], [155], [155], [155], [187], [144], [155], [155], [155]]}, "learning_rate_init": {"dims": ["iter", "suggestion"], "attrs": {}, "data": [[0.05435100029488454], [0.03014592906046547], [0.05435100029488454], [0.04827391018386822], [0.05435100029488454], [0.05435100029488454], [0.05435100029488454], [0.08526669522967094], [0.07594749607930222], [0.05435100029488454], [0.05435100029488454], [0.05435100029488454], [0.05435100029488454], [0.04270996423705913], [0.05435100029488454], [0.05836371575393067], [0.020706518395760588], [0.05435100029488454], [0.07236012921951122], [0.05435100029488454]]}, "tol": {"dims": ["iter", "suggestion"], "attrs": {}, "data": [[0.01778357652152456], [0.05156143099996518], [0.03775948202322093], [0.05463574236383411], [0.03775948202322093], [0.049889877729029024], [0.03775948202322093], [0.040639828956802564], [0.03433433188165796], [0.03775948202322093], [0.03775948202322093], [0.022000563814707986], [0.03775948202322093], [0.03775948202322093], [0.03775948202322093], [0.0036432754703096715], [0.019166536138933644], [0.03775948202322093], [0.03775948202322093], [0.03775948202322093]]}, "validation_fraction": {"dims": ["iter", "suggestion"], "attrs": {}, "data": [[0.8807963867698375], [0.5541039921306394], [0.8807963867698375], [0.7853182126552449], [0.8807963867698375], [0.8807963867698375], [0.8807963867698375], [0.8807963867698375], [0.8807963867698375], [0.8807963867698375], [0.8807963867698375], [0.8807963867698375], [0.8807963867698375], [0.8558655411854598], [0.8807963867698375], [0.4935346689839357], [0.8987482795184779], [0.8599703013917918], [0.822854604255648], [0.8807963867698375]]}}}}
