# Supplementary material
Source: ML conference proceedings conference paper supplement (https://proceedings.neurips.cc/paper_files/paper/2022/hash/31a57804448363bcab777f818f75f5b4-Abstract.html)
Supplement: Supplementary file 1 [file 31a57804448363bcab777f818f75f5b4-Supplemental-Conference.zip › trading_off_resource_budgets_f-Supplementary Material/code_and_data/experiments/base_results/bo_20220228_124924_b7rkpeqg/suggest_log/018e629276875545968705bf6c834c82.json]

{"meta": {"args": {"--uuid": "018e629276875545968705bf6c834c82", "-db-root": "/home/damon_falck/blackboxbandits/experiments/saved_results", "--opt-root": "/home/damon_falck/blackboxbandits/experiments", "--data-root": "/home/damon_falck/blackboxbandits/experiments/penn_datasets", "--db": "bo_20220228_124924_b7rkpeqg", "--opt": "Scikit-GP-Hedge", "--data": "clf-analcatdata-cyyoung8092", "--classifier": "lasso", "--metric": "nll", "--calls": 20, "--suggestions": 1, "--jobs-file": null, "--verbose": false, "dry_run": false, "rev": "bd14afd", "opt_rev": "0.9.0"}, "signature": [[{"C": 1.5676677195506077, "intercept_scaling": 7.257005721594282}, {"C": 2.57663857461359, "intercept_scaling": 1.5119336467641016}, {"C": 0.49501595537331966, "intercept_scaling": 3.833332156156665}, {"C": 0.5627932047415171, "intercept_scaling": 36.905577292137636}, {"C": 71.55682161754872, "intercept_scaling": 0.34179529120610125}], [0.30963443703288857, 0.32169544700989566, 0.3115466696259948, 0.2966203416134016, 0.8119181489712032]]},
"data": {"coords": {"iter": {"dims": ["iter"], "attrs": {}, "data": [0, 1, 2, 3, 4, 5, 6, 7, 8, 9, 10, 11, 12, 13, 14, 15, 16, 17, 18, 19]}, "suggestion": {"dims": ["suggestion"], "attrs": {}, "data": [0]}}, "attrs": {}, "dims": {"iter": 20, "suggestion": 1}, "data_vars": {"C": {"dims": ["iter", "suggestion"], "attrs": {}, "data": [[43.10809587422858], [0.048024911038915596], [0.050884603432257314], [0.010207785121094874], [0.019963375735197356], [0.228796668701745], [0.36703878607922746], [1.5794693455571283], [3.3461591129615917], [1.0044310422435772], [0.6704171111775722], [0.6572277043822002], [0.9123280828482621], [0.3970581372331741], [0.7664563537675905], [5.633454644264979], [0.7619148025123857], [0.7594441800956493], [0.7580827254452875], [99.72872827653053]]}, "intercept_scaling": {"dims": ["iter", "suggestion"], "attrs": {}, "data": [[0.11964388820362276], [0.03781968396287219], [0.643793251801073], [1.106466447999735], [0.026205983044356552], [0.01], [0.01], [100.0], [0.01], [0.01], [100.0], [100.0], [100.0], [99.62712634126258], [100.0], [100.0], [100.0], [100.0], [100.0], [91.09201690820032]]}}}}
