# Supplementary material
Source: ML conference proceedings conference paper supplement (https://proceedings.neurips.cc/paper_files/paper/2022/hash/31a57804448363bcab777f818f75f5b4-Abstract.html)
Supplement: Supplementary file 1 [file 31a57804448363bcab777f818f75f5b4-Supplemental-Conference.zip › trading_off_resource_budgets_f-Supplementary Material/code_and_data/experiments/base_results/bo_20220228_124924_b7rkpeqg/suggest_log/019dbe7b6d22570d9bafb4f74c50b7a9.json]

{"meta": {"args": {"--uuid": "019dbe7b6d22570d9bafb4f74c50b7a9", "-db-root": "/home/damon_falck/blackboxbandits/experiments/saved_results", "--opt-root": "/home/damon_falck/blackboxbandits/experiments", "--data-root": "/home/damon_falck/blackboxbandits/experiments/penn_datasets", "--db": "bo_20220228_124924_b7rkpeqg", "--opt": "Scikit-GP-LCB", "--data": "reg-650-fri-c0-500-50", "--classifier": "MLP-adam", "--metric": "mse", "--calls": 20, "--suggestions": 1, "--jobs-file": null, "--verbose": false, "dry_run": false, "rev": "bd14afd", "opt_rev": "0.9.0"}, "signature": [[{"alpha": 0.019628224813442792, "batch_size": 182, "beta_1": 0.9410202200271762, "beta_2": 0.9998021557676793, "epsilon": 1.8662266976518e-08, "hidden_layer_sizes": 147, "learning_rate_init": 0.0005627932047415167, "tol": 0.03690557729213761, "validation_fraction": 0.8846827852548593}, {"alpha": 0.001998246739232944, "batch_size": 200, "beta_1": 0.919111482530466, "beta_2": 0.9998488260436156, "epsilon": 5.981221901152555e-07, "hidden_layer_sizes": 61, "learning_rate_init": 2.2310905607443014e-05, "tol": 1.2046852412030316e-05, "validation_fraction": 0.8117896445826539}, {"alpha": 0.46659545670218433, "batch_size": 219, "beta_1": 0.9889789783750891, "beta_2": 0.9999896868093284, "epsilon": 2.4234724484675948e-08, "hidden_layer_sizes": 167, "learning_rate_init": 2.972334644335654e-05, "tol": 0.0036281404040243792, "validation_fraction": 0.17260651658522078}, {"alpha": 4.656005689076002, "batch_size": 135, "beta_1": 0.870503881627747, "beta_2": 0.9948873266941017, "epsilon": 2.1023308743480125e-07, "hidden_layer_sizes": 118, "learning_rate_init": 0.001878173875716191, "tol": 1.1889379831773006e-05, "validation_fraction": 0.6264327093752792}, {"alpha": 0.04705159350400542, "batch_size": 158, "beta_1": 0.9870884262730957, "beta_2": 0.9999596874382349, "epsilon": 1.1981845126013875e-08, "hidden_layer_sizes": 116, "learning_rate_init": 0.006173405204074311, "tol": 1.7414134181586194e-05, "validation_fraction": 0.6754299026638921}], [1.1570719405984589, 1.9551017609998684, 1.1780576433283738, 0.36803124133846976, 0.5214639989335306]]},
"data": {"coords": {"iter": {"dims": ["iter"], "attrs": {}, "data": [0, 1, 2, 3, 4, 5, 6, 7, 8, 9, 10, 11, 12, 13, 14, 15, 16, 17, 18, 19]}, "suggestion": {"dims": ["suggestion"], "attrs": {}, "data": [0]}}, "attrs": {}, "dims": {"iter": 20, "suggestion": 1}, "data_vars": {"alpha": {"dims": ["iter", "suggestion"], "attrs": {}, "data": [[0.10290220422627487], [0.010999279395518218], [0.0017028288884016337], [0.4257581486711596], [0.0027735988047227086], [10.0], [0.02435739372190733], [0.20014077000147135], [0.46590675999479586], [0.0056215750226615525], [0.7369367002949463], [0.07405393486538789], [0.21053235645119145], [0.008170645122572736], [0.01297234795064692], [0.00027800553935869535], [0.0009751065087897241], [0.000567985724413988], [0.00015969205776148617], [0.023047962062264313]]}, "batch_size": {"dims": ["iter", "suggestion"], "attrs": {}, "data": [[72], [20], [139], [139], [44], [10], [136], [99], [169], [34], [230], [227], [52], [229], [68], [71], [211], [10], [232], [87]]}, "beta_1": {"dims": ["iter", "suggestion"], "attrs": {}, "data": [[0.9317756956574472], [0.5417499327136147], [0.5566056992803563], [0.6556372648105979], [0.7055708870649583], [0.5], [0.9261169902982354], [0.5], [0.8396838052251916], [0.716458417178802], [0.5047006409446363], [0.6433176905215601], [0.5981270074523922], [0.9728086005742053], [0.5110082355039841], [0.99], [0.8053979118301642], [0.525509331448056], [0.678952540066754], [0.7946437341982303]]}, "beta_2": {"dims": ["iter", "suggestion"], "attrs": {}, "data": [[0.9998496927295248], [0.9323062389927377], [0.9099369678291381], [0.9533185621624507], [0.9913600513730679], [0.999999], [0.9511172200271688], [0.9573022908644471], [0.9636148892903869], [0.9540322628564802], [0.9535579071282845], [0.9459680556390774], [0.9233694213986177], [0.9292410886261186], [0.9019674547658757], [0.9874975459419869], [0.9203149953511321], [0.999999], [0.9], [0.907361753132487]]}, "epsilon": {"dims": ["iter", "suggestion"], "attrs": {}, "data": [[1.264049425608736e-08], [1.295793239377234e-09], [3.3751686199032775e-09], [7.995960424434734e-08], [4.0254036488427434e-07], [1e-06], [5.647113500552421e-09], [9.255741187504108e-07], [1e-06], [1.6256987103836754e-08], [5.4161287945758335e-09], [2.3727778989395271e-07], [3.338034954551629e-08], [1.3951348089814615e-07], [3.676735589344388e-09], [1e-09], [1.2573660198940343e-08], [3.365756488425609e-07], [1.5848973785288031e-09], [4.4906459032560767e-07]]}, "hidden_layer_sizes": {"dims": ["iter", "suggestion"], "attrs": {}, "data": [[197], [134], [149], [197], [101], [200], [194], [132], [200], [200], [200], [89], [132], [200], [131], [59], [67], [71], [170], [156]]}, "learning_rate_init": {"dims": ["iter", "suggestion"], "attrs": {}, "data": [[0.0001316309957938083], [0.005940920474801964], [0.00018540506904553264], [0.005296792010781618], [0.0006168245827690682], [0.1], [0.00011709195069172442], [0.000935234453186799], [0.08630079981295898], [0.010067470333538378], [0.0022305466660364603], [0.013158981959552375], [0.0005846822560241241], [0.06555760487815797], [0.012587058512954758], [3.619930251010311e-05], [4.5805400225891016e-05], [5.550058353472345e-05], [0.0011404224976851577], [6.490135969496012e-05]]}, "tol": {"dims": ["iter", "suggestion"], "attrs": {}, "data": [[0.06306715455210515], [0.003751837296882206], [0.0020490395383319553], [0.0001957985952040779], [0.05918891894058798], [1e-05], [0.0001496312975279055], [0.00033657263305185696], [1e-05], [0.0004453068915870798], [0.003648635478863302], [3.060172676708641e-05], [0.0005574198499270535], [0.003815603914517797], [0.1], [1e-05], [0.08030250202907517], [0.1], [1e-05], [1e-05]]}, "validation_fraction": {"dims": ["iter", "suggestion"], "attrs": {}, "data": [[0.3105480264966489], [0.11994423012877059], [0.38613940446667766], [0.31845790726639617], [0.4393406687000502], [0.1], [0.11721200375890303], [0.8969864014491331], [0.5436749164309987], [0.7110907787272086], [0.3901914679387377], [0.6037751226459209], [0.19532031279676598], [0.1], [0.23243053703978106], [0.10003780492564403], [0.1], [0.15973029917347167], [0.2106840785325297], [0.1]]}}}}
