# Supplementary material
Source: ML conference proceedings conference paper supplement (https://proceedings.neurips.cc/paper_files/paper/2022/hash/31a57804448363bcab777f818f75f5b4-Abstract.html)
Supplement: Supplementary file 1 [file 31a57804448363bcab777f818f75f5b4-Supplemental-Conference.zip › trading_off_resource_budgets_f-Supplementary Material/code_and_data/experiments/base_results/bo_20220228_124924_b7rkpeqg/suggest_log/019e542bf6c5565081c42b42e6b99d3b.json]

{"meta": {"args": {"--uuid": "019e542bf6c5565081c42b42e6b99d3b", "-db-root": "/home/damon_falck/blackboxbandits/experiments/saved_results", "--opt-root": "/home/damon_falck/blackboxbandits/experiments", "--data-root": "/home/damon_falck/blackboxbandits/experiments/penn_datasets", "--db": "bo_20220228_124924_b7rkpeqg", "--opt": "HyperOpt", "--data": "clf-chess", "--classifier": "MLP-adam", "--metric": "nll", "--calls": 20, "--suggestions": 1, "--jobs-file": null, "--verbose": false, "dry_run": false, "rev": "bd14afd", "opt_rev": "0.2.7"}, "signature": [[{"alpha": 0.019628224813442792, "batch_size": 182, "beta_1": 0.9410202200271762, "beta_2": 0.9998021557676793, "epsilon": 1.8662266976518e-08, "hidden_layer_sizes": 147, "learning_rate_init": 0.0005627932047415167, "tol": 0.03690557729213761, "validation_fraction": 0.8846827852548593}, {"alpha": 0.001998246739232944, "batch_size": 200, "beta_1": 0.919111482530466, "beta_2": 0.9998488260436156, "epsilon": 5.981221901152555e-07, "hidden_layer_sizes": 61, "learning_rate_init": 2.2310905607443014e-05, "tol": 1.2046852412030316e-05, "validation_fraction": 0.8117896445826539}, {"alpha": 0.46659545670218433, "batch_size": 219, "beta_1": 0.9889789783750891, "beta_2": 0.9999896868093284, "epsilon": 2.4234724484675948e-08, "hidden_layer_sizes": 167, "learning_rate_init": 2.972334644335654e-05, "tol": 0.0036281404040243792, "validation_fraction": 0.17260651658522078}, {"alpha": 4.656005689076002, "batch_size": 135, "beta_1": 0.870503881627747, "beta_2": 0.9948873266941017, "epsilon": 2.1023308743480125e-07, "hidden_layer_sizes": 118, "learning_rate_init": 0.001878173875716191, "tol": 1.1889379831773006e-05, "validation_fraction": 0.6264327093752792}, {"alpha": 0.04705159350400542, "batch_size": 158, "beta_1": 0.9870884262730957, "beta_2": 0.9999596874382349, "epsilon": 1.1981845126013875e-08, "hidden_layer_sizes": 116, "learning_rate_init": 0.006173405204074311, "tol": 1.7414134181586194e-05, "validation_fraction": 0.6754299026638921}], [0.5338769013007131, 0.6732979577548193, 0.49487346451578446, 0.17414542694923696, 0.07194796904543344]]},
"data": {"coords": {"iter": {"dims": ["iter"], "attrs": {}, "data": [0, 1, 2, 3, 4, 5, 6, 7, 8, 9, 10, 11, 12, 13, 14, 15, 16, 17, 18, 19]}, "suggestion": {"dims": ["suggestion"], "attrs": {}, "data": [0]}}, "attrs": {}, "dims": {"iter": 20, "suggestion": 1}, "data_vars": {"alpha": {"dims": ["iter", "suggestion"], "attrs": {}, "data": [[1.1226366688704541e-05], [0.004336851385843007], [0.08148805543732593], [9.580751527397284e-05], [0.005438520371349166], [0.012149006370119578], [0.00016803199231700495], [0.11646433746614056], [0.001099721331917165], [0.0007899918661359979], [0.00907526868652321], [1.0909845636330383e-05], [0.0008008410333418284], [9.523567467077283], [2.79908183807841], [0.070991983129155], [0.06053278448774188], [0.020925711979019854], [0.0001883577966368064], [0.02693026304942313]]}, "batch_size": {"dims": ["iter", "suggestion"], "attrs": {}, "data": [[136], [42], [214], [162], [110], [17], [160], [212], [143], [249], [243], [161], [68], [27], [30], [57], [116], [143], [241], [231]]}, "beta_1": {"dims": ["iter", "suggestion"], "attrs": {}, "data": [[0.5136057182438527], [0.807706341337905], [0.8572733315973603], [0.5656544754932707], [0.6691635079081586], [0.5813158330401479], [0.6063238428376135], [0.7454156371445504], [0.8014326717079047], [0.5018939154133251], [0.7363368096688797], [0.7459598561695111], [0.6647596895045246], [0.6079515295078239], [0.6982927681412465], [0.8168275863503807], [0.6913724159332583], [0.8471370279712541], [0.9165409893315779], [0.5910984111445715]]}, "beta_2": {"dims": ["iter", "suggestion"], "attrs": {}, "data": [[0.9104816813856795], [0.9701096372986592], [0.9027894156342453], [0.9087682288616287], [0.9817972520291831], [0.9603508704371605], [0.930166979478387], [0.961695949695337], [0.9699713792609507], [0.9312390213195739], [0.952519563269497], [0.9237996367789797], [0.9798659252442872], [0.9100643855773137], [0.9190279711381513], [0.944275107958082], [0.9277998315106907], [0.9434879038432674], [0.9744535320812656], [0.937520711063125]]}, "epsilon": {"dims": ["iter", "suggestion"], "attrs": {}, "data": [[2.9460757998986104e-07], [2.1185756667192535e-09], [7.565625482430173e-08], [3.0266092695730904e-09], [2.9393656309774723e-08], [3.40175671919511e-07], [1.27107825289401e-07], [9.205508938923636e-09], [6.6108510128734186e-09], [1.0234076637907274e-09], [1.1993779815701948e-07], [1.0720038189964668e-07], [2.2970085494205522e-07], [5.290635072434293e-09], [2.2168872368976817e-08], [9.280806201835881e-07], [2.234325068926796e-09], [5.831342204190412e-08], [3.0382295785224147e-09], [1.6707680905619467e-08]]}, "hidden_layer_sizes": {"dims": ["iter", "suggestion"], "attrs": {}, "data": [[99], [56], [73], [182], [90], [77], [85], [50], [93], [117], [117], [73], [92], [164], [52], [155], [192], [74], [67], [70]]}, "learning_rate_init": {"dims": ["iter", "suggestion"], "attrs": {}, "data": [[0.0003018795926478381], [0.00039250301982710875], [0.00033754316736625035], [0.00031753636034071944], [8.888338658878794e-05], [0.00025467328592832937], [0.023984771439198554], [0.00020755658152187996], [0.0006935308053419249], [0.0006765651408255504], [0.0005795670139667628], [0.0016225394170835301], [1.4342605224548854e-05], [0.00021306062777160314], [0.04116670976862454], [0.09964398187351362], [0.0017910001637112653], [0.04870926335736024], [0.004415285571473303], [0.0002308354438610046]]}, "tol": {"dims": ["iter", "suggestion"], "attrs": {}, "data": [[0.00800996711794932], [0.000286184198747038], [0.007287584878438336], [0.00015965618699909318], [0.0005195805990365811], [7.346561029145363e-05], [1.2228473621982296e-05], [0.07665146212545207], [0.00020857945585003854], [0.0019631592214703025], [0.0030119556975317747], [0.0006146049847427627], [8.049747920435931e-05], [1.8624504715782694e-05], [0.003155720939605045], [0.009422933510278557], [0.011877109708610238], [0.0025994834218975357], [0.0007745025201937605], [0.0018308427210836544]]}, "validation_fraction": {"dims": ["iter", "suggestion"], "attrs": {}, "data": [[0.593979189947557], [0.23522681376123247], [0.5192136376724347], [0.12082472211057307], [0.1837431943356726], [0.17664380299967058], [0.7411886005268978], [0.28883547110243313], [0.4123109139651671], [0.6330341471364969], [0.5175810449283217], [0.17604151594831266], [0.6064046955319851], [0.1732974249340959], [0.45650537901548244], [0.2443471401347076], [0.7628306413524805], [0.11105219190969971], [0.8857435373378927], [0.1675312940979856]]}}}}
