# Supplementary material
Source: ML conference proceedings conference paper supplement (https://proceedings.neurips.cc/paper_files/paper/2022/hash/31a57804448363bcab777f818f75f5b4-Abstract.html)
Supplement: Supplementary file 1 [file 31a57804448363bcab777f818f75f5b4-Supplemental-Conference.zip › trading_off_resource_budgets_f-Supplementary Material/code_and_data/experiments/base_results/bo_20220228_124924_b7rkpeqg/suggest_log/022b5fb1b727541fa0d4e6ff6332399d.json]

{"meta": {"args": {"--uuid": "022b5fb1b727541fa0d4e6ff6332399d", "-db-root": "/home/damon_falck/blackboxbandits/experiments/saved_results", "--opt-root": "/home/damon_falck/blackboxbandits/experiments", "--data-root": "/home/damon_falck/blackboxbandits/experiments/penn_datasets", "--db": "bo_20220228_124924_b7rkpeqg", "--opt": "HyperOpt", "--data": "clf-texture", "--classifier": "lasso", "--metric": "nll", "--calls": 20, "--suggestions": 1, "--jobs-file": null, "--verbose": false, "dry_run": false, "rev": "bd14afd", "opt_rev": "0.2.7"}, "signature": [[{"C": 1.5676677195506077, "intercept_scaling": 7.257005721594282}, {"C": 2.57663857461359, "intercept_scaling": 1.5119336467641016}, {"C": 0.49501595537331966, "intercept_scaling": 3.833332156156665}, {"C": 0.5627932047415171, "intercept_scaling": 36.905577292137636}, {"C": 71.55682161754872, "intercept_scaling": 0.34179529120610125}], [0.044501065000671865, 0.035335529940508384, 0.08618494061689971, 0.0779045533709111, 0.019556687936390232]]},
"data": {"coords": {"iter": {"dims": ["iter"], "attrs": {}, "data": [0, 1, 2, 3, 4, 5, 6, 7, 8, 9, 10, 11, 12, 13, 14, 15, 16, 17, 18, 19]}, "suggestion": {"dims": ["suggestion"], "attrs": {}, "data": [0]}}, "attrs": {}, "dims": {"iter": 20, "suggestion": 1}, "data_vars": {"C": {"dims": ["iter", "suggestion"], "attrs": {}, "data": [[0.0574296553398871], [0.14311837031202654], [11.771759512335386], [0.9498142917801329], [0.04671398741371559], [1.3039326719418407], [26.225256084220423], [6.291509852160651], [5.292991561661773], [0.5418477649508097], [0.4845558123705277], [6.075401668630713], [0.217294612067649], [0.747543540043646], [0.4054165584329162], [37.585332043793265], [0.8690618631935865], [68.46656169632558], [30.453301333281896], [0.03242446650905479]]}, "intercept_scaling": {"dims": ["iter", "suggestion"], "attrs": {}, "data": [[11.890871969152728], [0.04176832715960219], [0.03821211964083181], [0.5676921566665567], [1.495732511687569], [7.457692322297916], [0.27772343895093266], [9.58547459516822], [0.022291882946046532], [0.06060663589301762], [0.596965225662801], [0.03969526953432027], [51.62353868426639], [25.788751440303017], [0.24296860502110196], [0.19913283962745412], [6.255674006516031], [11.648695538922043], [26.62268545222106], [0.28318684398832805]]}}}}
