# Supplementary material
Source: ML conference proceedings conference paper supplement (https://proceedings.neurips.cc/paper_files/paper/2022/hash/31a57804448363bcab777f818f75f5b4-Abstract.html)
Supplement: Supplementary file 1 [file 31a57804448363bcab777f818f75f5b4-Supplemental-Conference.zip › trading_off_resource_budgets_f-Supplementary Material/code_and_data/experiments/base_results/bo_20220228_124924_b7rkpeqg/suggest_log/023f67fff9f8553cbe05d9bd72ab43c8.json]

{"meta": {"args": {"--uuid": "023f67fff9f8553cbe05d9bd72ab43c8", "-db-root": "/home/damon_falck/blackboxbandits/experiments/saved_results", "--opt-root": "/home/damon_falck/blackboxbandits/experiments", "--data-root": "/home/damon_falck/blackboxbandits/experiments/penn_datasets", "--db": "bo_20220228_124924_b7rkpeqg", "--opt": "RandomSearch", "--data": "reg-573-cpu-act", "--classifier": "lasso", "--metric": "mse", "--calls": 20, "--suggestions": 1, "--jobs-file": null, "--verbose": false, "dry_run": false, "rev": "bd14afd", "opt_rev": "0.0.8"}, "signature": [[{"alpha": 1.5676677195506077, "fit_intercept": true, "max_iter": 423, "normalize": true, "positive": false, "tol": 0.0038333321561566623}, {"alpha": 0.5627932047415171, "fit_intercept": true, "max_iter": 3989, "normalize": false, "positive": true, "tol": 0.001304907355036239}, {"alpha": 1.871450068624068, "fit_intercept": true, "max_iter": 16, "normalize": false, "positive": false, "tol": 0.021403233140986057}, {"alpha": 12.960656597279737, "fit_intercept": true, "max_iter": 4378, "normalize": true, "positive": false, "tol": 0.013246974647468445}, {"alpha": 0.029723346443356558, "fit_intercept": true, "max_iter": 24, "normalize": true, "positive": true, "tol": 0.00045566719139214756}], [3.0561122972803973, 1.815207631742129, 0.681533285588009, 3.0561122972803973, 3.0561122972803973]]},
"data": {"coords": {"iter": {"dims": ["iter"], "attrs": {}, "data": [0, 1, 2, 3, 4, 5, 6, 7, 8, 9, 10, 11, 12, 13, 14, 15, 16, 17, 18, 19]}, "suggestion": {"dims": ["suggestion"], "attrs": {}, "data": [0]}}, "attrs": {}, "dims": {"iter": 20, "suggestion": 1}, "data_vars": {"alpha": {"dims": ["iter", "suggestion"], "attrs": {}, "data": [[5.501446272661663], [16.795414701010277], [5.547722371623371], [0.13890203879649304], [0.7098658134613973], [0.04778746411507307], [14.686768864174121], [0.016471723225947327], [0.0898516565106336], [0.027707000888643595], [7.246694528483652], [0.02832177124128433], [0.03559604036431485], [2.123703224424149], [2.67900911000372], [0.01858896458476959], [0.11893931539970523], [0.23241413594658633], [0.043217710958787695], [0.611976512559321]]}, "fit_intercept": {"dims": ["iter", "suggestion"], "attrs": {}, "data": [[false], [true], [true], [false], [false], [false], [true], [true], [false], [false], [false], [false], [false], [false], [true], [false], [false], [false], [true], [true]]}, "max_iter": {"dims": ["iter", "suggestion"], "attrs": {}, "data": [[117], [3528], [14], [458], [44], [3060], [33], [1394], [2597], [1649], [154], [87], [317], [25], [672], [3722], [465], [72], [126], [1857]]}, "normalize": {"dims": ["iter", "suggestion"], "attrs": {}, "data": [[false], [false], [true], [false], [true], [true], [true], [true], [false], [false], [false], [true], [false], [true], [false], [true], [false], [true], [true], [true]]}, "positive": {"dims": ["iter", "suggestion"], "attrs": {}, "data": [[false], [true], [true], [true], [true], [true], [false], [true], [true], [false], [false], [true], [false], [true], [false], [true], [true], [false], [true], [false]]}, "tol": {"dims": ["iter", "suggestion"], "attrs": {}, "data": [[5.49677923784502e-05], [5.06199219594063e-05], [0.04743858121539137], [0.006121799804389516], [0.0031595845263975206], [0.004819460377022418], [0.0002764197467980858], [0.001858954155549143], [0.0073704203747751015], [0.0008379215200161641], [0.054486254356847334], [0.017912120605273044], [0.0006163525450497879], [0.00033466142701994207], [0.04653516465646267], [0.0817139196612609], [0.031449189385566234], [0.025133292335885425], [0.000559591204002954], [0.0031668808805284925]]}}}}
