# Supplementary material
Source: ML conference proceedings conference paper supplement (https://proceedings.neurips.cc/paper_files/paper/2022/hash/31a57804448363bcab777f818f75f5b4-Abstract.html)
Supplement: Supplementary file 1 [file 31a57804448363bcab777f818f75f5b4-Supplemental-Conference.zip › trading_off_resource_budgets_f-Supplementary Material/code_and_data/experiments/base_results/bo_20220228_124924_b7rkpeqg/suggest_log/024a16146c0350df96afbf0a56bfdde9.json]

{"meta": {"args": {"--uuid": "024a16146c0350df96afbf0a56bfdde9", "-db-root": "/home/damon_falck/blackboxbandits/experiments/saved_results", "--opt-root": "/home/damon_falck/blackboxbandits/experiments", "--data-root": "/home/damon_falck/blackboxbandits/experiments/penn_datasets", "--db": "bo_20220228_124924_b7rkpeqg", "--opt": "RandomSearch", "--data": "clf-ecoli", "--classifier": "lasso", "--metric": "nll", "--calls": 20, "--suggestions": 1, "--jobs-file": null, "--verbose": false, "dry_run": false, "rev": "bd14afd", "opt_rev": "0.0.8"}, "signature": [[{"C": 1.5676677195506077, "intercept_scaling": 7.257005721594282}, {"C": 2.57663857461359, "intercept_scaling": 1.5119336467641016}, {"C": 0.49501595537331966, "intercept_scaling": 3.833332156156665}, {"C": 0.5627932047415171, "intercept_scaling": 36.905577292137636}, {"C": 71.55682161754872, "intercept_scaling": 0.34179529120610125}], [0.38466902368944317, 0.3880981548403347, 0.40373861619307894, 0.39599406979294016, 0.47264432078985485]]},
"data": {"coords": {"iter": {"dims": ["iter"], "attrs": {}, "data": [0, 1, 2, 3, 4, 5, 6, 7, 8, 9, 10, 11, 12, 13, 14, 15, 16, 17, 18, 19]}, "suggestion": {"dims": ["suggestion"], "attrs": {}, "data": [0]}}, "attrs": {}, "dims": {"iter": 20, "suggestion": 1}, "data_vars": {"C": {"dims": ["iter", "suggestion"], "attrs": {}, "data": [[4.943655471693558], [0.24035619302418804], [0.20301354371335334], [0.8623690734874546], [0.5275385073610296], [1.08156305491919], [55.247350692034125], [0.09860252989207165], [2.8793490400474124], [0.7221590262215762], [4.485329473823331], [0.011805385436139555], [80.82707565672536], [0.4350332958541358], [0.20906529646602262], [5.08934901180947], [19.212133974842125], [1.0425084321873226], [2.692863454875628], [12.868141560817634]]}, "intercept_scaling": {"dims": ["iter", "suggestion"], "attrs": {}, "data": [[0.031593525415774676], [19.295067485547104], [6.786547905182383], [3.242876513040753], [2.4268606165816813], [0.08299060775970757], [0.43426793886990467], [0.029161952281935168], [0.041116582435016875], [25.723567771210224], [87.6032903447318], [0.03179954322734447], [7.77407796135349], [0.08924886320165218], [38.02912730910402], [0.012491220119693738], [0.011546127136698829], [92.91435241373142], [60.3004942055835], [15.85832487704519]]}}}}
