# Supplementary material
Source: ML conference proceedings conference paper supplement (https://proceedings.neurips.cc/paper_files/paper/2022/hash/31a57804448363bcab777f818f75f5b4-Abstract.html)
Supplement: Supplementary file 1 [file 31a57804448363bcab777f818f75f5b4-Supplemental-Conference.zip › trading_off_resource_budgets_f-Supplementary Material/code_and_data/experiments/base_results/bo_20220228_124924_b7rkpeqg/suggest_log/024d1d3c51f75ee3bf9b0e80d10de3f0.json]

{"meta": {"args": {"--uuid": "024d1d3c51f75ee3bf9b0e80d10de3f0", "-db-root": "/home/damon_falck/blackboxbandits/experiments/saved_results", "--opt-root": "/home/damon_falck/blackboxbandits/experiments", "--data-root": "/home/damon_falck/blackboxbandits/experiments/penn_datasets", "--db": "bo_20220228_124924_b7rkpeqg", "--opt": "Scikit-GBRT-Hedge", "--data": "clf-yeast", "--classifier": "lasso", "--metric": "nll", "--calls": 20, "--suggestions": 1, "--jobs-file": null, "--verbose": false, "dry_run": false, "rev": "bd14afd", "opt_rev": "0.9.0"}, "signature": [[{"C": 1.5676677195506077, "intercept_scaling": 7.257005721594282}, {"C": 2.57663857461359, "intercept_scaling": 1.5119336467641016}, {"C": 0.49501595537331966, "intercept_scaling": 3.833332156156665}, {"C": 0.5627932047415171, "intercept_scaling": 36.905577292137636}, {"C": 71.55682161754872, "intercept_scaling": 0.34179529120610125}], [1.1042319431453453, 1.1043828116452292, 1.1097046446329835, 1.1070219101640877, 1.1061554167581513]]},
"data": {"coords": {"iter": {"dims": ["iter"], "attrs": {}, "data": [0, 1, 2, 3, 4, 5, 6, 7, 8, 9, 10, 11, 12, 13, 14, 15, 16, 17, 18, 19]}, "suggestion": {"dims": ["suggestion"], "attrs": {}, "data": [0]}}, "attrs": {}, "dims": {"iter": 20, "suggestion": 1}, "data_vars": {"C": {"dims": ["iter", "suggestion"], "attrs": {}, "data": [[16.207389659180134], [3.238252553862088], [0.03784379325162877], [24.313142437332747], [13.036701040389417], [0.1262901924714252], [0.062237255267116584], [9.04036766218844], [0.026356597428975732], [0.012840691956624798], [16.19590557710866], [6.465601054355747], [6.532481060483839], [6.565563476010207], [7.644534136848722], [7.5365414621877145], [0.019002528237846327], [19.082038754632027], [6.587127977906298], [0.028919585670461392]]}, "intercept_scaling": {"dims": ["iter", "suggestion"], "attrs": {}, "data": [[2.4115694809343573], [0.025283406980115986], [7.763511275051929], [3.115669571877277], [40.78231089859111], [18.712705967601117], [35.002837886207516], [57.48291592832328], [0.22182320525860844], [15.706876878838862], [47.408205045834976], [56.66697059905691], [55.59846664920097], [52.85737382458363], [53.839525581834785], [0.42581991133344127], [55.740017027356245], [0.19180819921210013], [0.21820950442466747], [0.020970439871860647]]}}}}
