# Supplementary material
Source: ML conference proceedings conference paper supplement (https://proceedings.neurips.cc/paper_files/paper/2022/hash/31a57804448363bcab777f818f75f5b4-Abstract.html)
Supplement: Supplementary file 1 [file 31a57804448363bcab777f818f75f5b4-Supplemental-Conference.zip › trading_off_resource_budgets_f-Supplementary Material/code_and_data/experiments/base_results/bo_20220228_124924_b7rkpeqg/suggest_log/024def10ebc151d0ae149ee76a5e0449.json]

{"meta": {"args": {"--uuid": "024def10ebc151d0ae149ee76a5e0449", "-db-root": "/home/damon_falck/blackboxbandits/experiments/saved_results", "--opt-root": "/home/damon_falck/blackboxbandits/experiments", "--data-root": "/home/damon_falck/blackboxbandits/experiments/penn_datasets", "--db": "bo_20220228_124924_b7rkpeqg", "--opt": "Scikit-GP-Hedge", "--data": "clf-penguins", "--classifier": "MLP-adam", "--metric": "nll", "--calls": 20, "--suggestions": 1, "--jobs-file": null, "--verbose": false, "dry_run": false, "rev": "bd14afd", "opt_rev": "0.9.0"}, "signature": [[{"alpha": 0.019628224813442792, "batch_size": 182, "beta_1": 0.9410202200271762, "beta_2": 0.9998021557676793, "epsilon": 1.8662266976518e-08, "hidden_layer_sizes": 147, "learning_rate_init": 0.0005627932047415167, "tol": 0.03690557729213761, "validation_fraction": 0.8846827852548593}, {"alpha": 0.001998246739232944, "batch_size": 200, "beta_1": 0.919111482530466, "beta_2": 0.9998488260436156, "epsilon": 5.981221901152555e-07, "hidden_layer_sizes": 61, "learning_rate_init": 2.2310905607443014e-05, "tol": 1.2046852412030316e-05, "validation_fraction": 0.8117896445826539}, {"alpha": 0.46659545670218433, "batch_size": 219, "beta_1": 0.9889789783750891, "beta_2": 0.9999896868093284, "epsilon": 2.4234724484675948e-08, "hidden_layer_sizes": 167, "learning_rate_init": 2.972334644335654e-05, "tol": 0.0036281404040243792, "validation_fraction": 0.17260651658522078}, {"alpha": 4.656005689076002, "batch_size": 135, "beta_1": 0.870503881627747, "beta_2": 0.9948873266941017, "epsilon": 2.1023308743480125e-07, "hidden_layer_sizes": 118, "learning_rate_init": 0.001878173875716191, "tol": 1.1889379831773006e-05, "validation_fraction": 0.6264327093752792}, {"alpha": 0.04705159350400542, "batch_size": 158, "beta_1": 0.9870884262730957, "beta_2": 0.9999596874382349, "epsilon": 1.1981845126013875e-08, "hidden_layer_sizes": 116, "learning_rate_init": 0.006173405204074311, "tol": 1.7414134181586194e-05, "validation_fraction": 0.6754299026638921}], [0.8994539135047063, 1.3094106164777397, 1.111889519964523, 0.22469241403557622, 0.15038101060328693]]},
"data": {"coords": {"iter": {"dims": ["iter"], "attrs": {}, "data": [0, 1, 2, 3, 4, 5, 6, 7, 8, 9, 10, 11, 12, 13, 14, 15, 16, 17, 18, 19]}, "suggestion": {"dims": ["suggestion"], "attrs": {}, "data": [0]}}, "attrs": {}, "dims": {"iter": 20, "suggestion": 1}, "data_vars": {"alpha": {"dims": ["iter", "suggestion"], "attrs": {}, "data": [[1.1032130493624989e-05], [5.877662152032893], [9.577417331681604], [0.0007576296160657937], [0.08188065086945932], [0.2557006978701549], [10.0], [1e-05], [0.046901111372024754], [6.36241673125672e-05], [0.12723400085439673], [10.0], [0.051875231152576994], [0.2479009278818138], [1.594389739168258e-05], [0.21821149936383097], [0.10732813440085488], [10.0], [10.0], [0.46382969959458037]]}, "batch_size": {"dims": ["iter", "suggestion"], "attrs": {}, "data": [[211], [100], [242], [248], [199], [200], [10], [10], [230], [10], [186], [250], [151], [229], [151], [235], [168], [45], [216], [211]]}, "beta_1": {"dims": ["iter", "suggestion"], "attrs": {}, "data": [[0.8842733334420217], [0.683182257038435], [0.9120344353707194], [0.6900848016774839], [0.9530223618370577], [0.99], [0.5], [0.99], [0.9678041042996015], [0.99], [0.9535903653987644], [0.9478053050099402], [0.9731499739831817], [0.9531502749718634], [0.9643943775046395], [0.5829470978252093], [0.7773554263558877], [0.6184486450776268], [0.5659715811796523], [0.700217779707013]]}, "beta_2": {"dims": ["iter", "suggestion"], "attrs": {}, "data": [[0.9886439821800117], [0.9842384721632947], [0.9313590373209547], [0.9728544253955287], [0.9731152806277593], [0.9678801759450806], [0.999999], [0.999999], [0.996779558614153], [0.9329161434733472], [0.9619640402505619], [0.9706943458942686], [0.9590119922784983], [0.9629013703615334], [0.9508087894049716], [0.9571676648452253], [0.9193207536305954], [0.9696982570172314], [0.9512088221418843], [0.939859393062365]]}, "epsilon": {"dims": ["iter", "suggestion"], "attrs": {}, "data": [[6.984805602425768e-08], [5.157819698655564e-08], [4.183781256127937e-07], [1.8164488938474352e-08], [4.211055009682872e-08], [5.8399292014108445e-08], [1e-09], [1e-09], [2.4505373135644584e-08], [1.804391315777333e-09], [6.421333057280616e-08], [1e-06], [2.1174060407082172e-08], [8.848467289564829e-08], [9.189698596811679e-08], [1.3540505259036435e-07], [1e-09], [6.501260667791868e-09], [3.2146226952332385e-08], [3.1487184480396847e-09]]}, "hidden_layer_sizes": {"dims": ["iter", "suggestion"], "attrs": {}, "data": [[72], [62], [70], [130], [199], [200], [200], [200], [200], [200], [194], [109], [198], [200], [200], [200], [150], [82], [63], [140]]}, "learning_rate_init": {"dims": ["iter", "suggestion"], "attrs": {}, "data": [[0.0002646766251393043], [0.0019200523263642934], [0.07474320094089888], [0.0005251664512054292], [0.008539638621002687], [0.017878610133648384], [1e-05], [6.956118526467725e-05], [0.005381466680260088], [0.04938066733712803], [0.01528170293031332], [0.1], [0.1], [0.048856410988164796], [0.00031660566932679556], [0.001719510390340954], [0.1], [0.06285112305293329], [0.1], [0.055855092161812496]]}, "tol": {"dims": ["iter", "suggestion"], "attrs": {}, "data": [[6.706803968861469e-05], [0.00011277029083089336], [0.007322324340674293], [0.003882930176006294], [0.009890991898774114], [0.01369880607488088], [0.1], [0.008545837875405622], [0.011153169136611763], [0.01024169742171853], [0.009532487760991526], [0.0307059011628123], [0.01363401707184656], [0.009613682876634142], [0.00772514339677039], [0.03322699543202945], [0.008283774187995988], [0.0003188039648956335], [0.00979971736445705], [0.0038200441620756006]]}, "validation_fraction": {"dims": ["iter", "suggestion"], "attrs": {}, "data": [[0.4427146391949127], [0.7676887052650997], [0.3349741377889893], [0.7650561466388988], [0.5875352681345346], [0.5338124190383304], [0.9], [0.36590242687873986], [0.9], [0.11481127975540445], [0.45387268993735624], [0.9], [0.2726623635991736], [0.12175575454848012], [0.32831220967879843], [0.1923180134650114], [0.1], [0.6494582592555505], [0.23005433306124973], [0.8543104901892228]]}}}}
