# Supplementary material
Source: ML conference proceedings conference paper supplement (https://proceedings.neurips.cc/paper_files/paper/2022/hash/31a57804448363bcab777f818f75f5b4-Abstract.html)
Supplement: Supplementary file 1 [file 31a57804448363bcab777f818f75f5b4-Supplemental-Conference.zip › trading_off_resource_budgets_f-Supplementary Material/code_and_data/experiments/base_results/bo_20220228_124924_b7rkpeqg/suggest_log/026f38add405563692eea1303ae17028.json]

{"meta": {"args": {"--uuid": "026f38add405563692eea1303ae17028", "-db-root": "/home/damon_falck/blackboxbandits/experiments/saved_results", "--opt-root": "/home/damon_falck/blackboxbandits/experiments", "--data-root": "/home/damon_falck/blackboxbandits/experiments/penn_datasets", "--db": "bo_20220228_124924_b7rkpeqg", "--opt": "RandomSearch", "--data": "clf-new-thyroid", "--classifier": "lasso", "--metric": "nll", "--calls": 20, "--suggestions": 1, "--jobs-file": null, "--verbose": false, "dry_run": false, "rev": "bd14afd", "opt_rev": "0.0.8"}, "signature": [[{"C": 1.5676677195506077, "intercept_scaling": 7.257005721594282}, {"C": 2.57663857461359, "intercept_scaling": 1.5119336467641016}, {"C": 0.49501595537331966, "intercept_scaling": 3.833332156156665}, {"C": 0.5627932047415171, "intercept_scaling": 36.905577292137636}, {"C": 71.55682161754872, "intercept_scaling": 0.34179529120610125}], [0.15475392921649408, 0.14821575254205352, 0.2260990111855326, 0.20831325950313526, 0.21299236869327273]]},
"data": {"coords": {"iter": {"dims": ["iter"], "attrs": {}, "data": [0, 1, 2, 3, 4, 5, 6, 7, 8, 9, 10, 11, 12, 13, 14, 15, 16, 17, 18, 19]}, "suggestion": {"dims": ["suggestion"], "attrs": {}, "data": [0]}}, "attrs": {}, "dims": {"iter": 20, "suggestion": 1}, "data_vars": {"C": {"dims": ["iter", "suggestion"], "attrs": {}, "data": [[5.4781365555682635], [2.0061777535408476], [0.0450667578736183], [0.4364921944573504], [87.90887913605368], [87.77792952396499], [73.09065192031282], [8.276831436309411], [0.02689210874074987], [0.026732558790497317], [53.94781018185517], [0.1201735076550461], [61.5537108039385], [0.7555654547650321], [1.164726206519781], [0.5659927860592935], [0.6823881252964262], [0.012233593005578696], [0.25079334674789444], [17.580652874801434]]}, "intercept_scaling": {"dims": ["iter", "suggestion"], "attrs": {}, "data": [[0.042556642577347564], [0.028314884576756464], [0.1398861575919098], [8.089207618017737], [10.100899638938628], [1.7151328276739832], [0.010245696957803458], [2.0895300087400144], [0.06325897274889149], [0.12561655622463064], [0.9756454390012903], [91.29638440173409], [0.016301458138060974], [0.32499746848484373], [2.263545767376644], [95.5038534045784], [0.07681807338745483], [54.922693463224306], [1.0249187549726348], [1.0939921533740538]]}}}}
