# Supplementary material
Source: ML conference proceedings conference paper supplement (https://proceedings.neurips.cc/paper_files/paper/2022/hash/31a57804448363bcab777f818f75f5b4-Abstract.html)
Supplement: Supplementary file 1 [file 31a57804448363bcab777f818f75f5b4-Supplemental-Conference.zip › trading_off_resource_budgets_f-Supplementary Material/code_and_data/experiments/base_results/bo_20220228_124924_b7rkpeqg/suggest_log/032f6feda7f95f33b4962d0a14f0518c.json]

{"meta": {"args": {"--uuid": "032f6feda7f95f33b4962d0a14f0518c", "-db-root": "/home/damon_falck/blackboxbandits/experiments/saved_results", "--opt-root": "/home/damon_falck/blackboxbandits/experiments", "--data-root": "/home/damon_falck/blackboxbandits/experiments/penn_datasets", "--db": "bo_20220228_124924_b7rkpeqg", "--opt": "HyperOpt", "--data": "clf-wine-quality-red", "--classifier": "lasso", "--metric": "nll", "--calls": 20, "--suggestions": 1, "--jobs-file": null, "--verbose": false, "dry_run": false, "rev": "bd14afd", "opt_rev": "0.2.7"}, "signature": [[{"C": 1.5676677195506077, "intercept_scaling": 7.257005721594282}, {"C": 2.57663857461359, "intercept_scaling": 1.5119336467641016}, {"C": 0.49501595537331966, "intercept_scaling": 3.833332156156665}, {"C": 0.5627932047415171, "intercept_scaling": 36.905577292137636}, {"C": 71.55682161754872, "intercept_scaling": 0.34179529120610125}], [0.9775572718950933, 0.9791325062822303, 0.9736277552924948, 0.9737886835041218, 0.9917035508414214]]},
"data": {"coords": {"iter": {"dims": ["iter"], "attrs": {}, "data": [0, 1, 2, 3, 4, 5, 6, 7, 8, 9, 10, 11, 12, 13, 14, 15, 16, 17, 18, 19]}, "suggestion": {"dims": ["suggestion"], "attrs": {}, "data": [0]}}, "attrs": {}, "dims": {"iter": 20, "suggestion": 1}, "data_vars": {"C": {"dims": ["iter", "suggestion"], "attrs": {}, "data": [[82.247234594913], [1.1021519920954026], [0.023860043898143175], [36.24750985193466], [1.0414947271058677], [0.01213569040952033], [0.018684440375674263], [2.075100392143728], [0.04102215359302196], [44.130552978012624], [0.05657491392933348], [0.2719956797766877], [0.21871262510316383], [52.75875109630781], [0.09258766608066243], [1.044152297801364], [0.06893416823619129], [0.18108701902993504], [0.01569578105862132], [0.03898351775685317]]}, "intercept_scaling": {"dims": ["iter", "suggestion"], "attrs": {}, "data": [[45.11286588475193], [36.23469795061129], [0.013679946773292852], [0.011043551032073901], [0.19725518853270987], [93.89613821008757], [8.293392106341788], [7.08075245572444], [11.126382633156725], [0.17215006630967378], [2.2480658664840147], [0.11836218440719848], [25.863389491174456], [15.207034528021806], [78.78916254411602], [0.17165720988863503], [0.015322539313891962], [0.010366633218090586], [1.2450841723490234], [1.2368623844366724]]}}}}
