# Supplementary material
Source: ML conference proceedings conference paper supplement (https://proceedings.neurips.cc/paper_files/paper/2022/hash/31a57804448363bcab777f818f75f5b4-Abstract.html)
Supplement: Supplementary file 1 [file 31a57804448363bcab777f818f75f5b4-Supplemental-Conference.zip › trading_off_resource_budgets_f-Supplementary Material/code_and_data/experiments/base_results/bo_20220228_124924_b7rkpeqg/suggest_log/038a2c5080dc5385b29c779b3037b31a.json]

{"meta": {"args": {"--uuid": "038a2c5080dc5385b29c779b3037b31a", "-db-root": "/home/damon_falck/blackboxbandits/experiments/saved_results", "--opt-root": "/home/damon_falck/blackboxbandits/experiments", "--data-root": "/home/damon_falck/blackboxbandits/experiments/penn_datasets", "--db": "bo_20220228_124924_b7rkpeqg", "--opt": "Scikit-GBRT-Hedge", "--data": "clf-tic-tac-toe", "--classifier": "lasso", "--metric": "nll", "--calls": 20, "--suggestions": 1, "--jobs-file": null, "--verbose": false, "dry_run": false, "rev": "bd14afd", "opt_rev": "0.9.0"}, "signature": [[{"C": 1.5676677195506077, "intercept_scaling": 7.257005721594282}, {"C": 2.57663857461359, "intercept_scaling": 1.5119336467641016}, {"C": 0.49501595537331966, "intercept_scaling": 3.833332156156665}, {"C": 0.5627932047415171, "intercept_scaling": 36.905577292137636}, {"C": 71.55682161754872, "intercept_scaling": 0.34179529120610125}], [0.06727378945178517, 0.06268242159813114, 0.09823345038574538, 0.09172166817017664, 0.05626631953593188]]},
"data": {"coords": {"iter": {"dims": ["iter"], "attrs": {}, "data": [0, 1, 2, 3, 4, 5, 6, 7, 8, 9, 10, 11, 12, 13, 14, 15, 16, 17, 18, 19]}, "suggestion": {"dims": ["suggestion"], "attrs": {}, "data": [0]}}, "attrs": {}, "dims": {"iter": 20, "suggestion": 1}, "data_vars": {"C": {"dims": ["iter", "suggestion"], "attrs": {}, "data": [[2.324635219804746], [65.78503464889592], [42.51203174036068], [50.22573129488319], [0.013384695907073365], [0.016561694117011395], [96.20444041489644], [24.30004398440907], [0.010155598229040384], [24.008838467094662], [27.32962858934138], [33.86061862771349], [0.011829193208421967], [30.857823899997452], [26.71993909552987], [28.693690116587558], [14.99409807658331], [40.049666172291474], [40.16991686127508], [39.906922141448725]]}, "intercept_scaling": {"dims": ["iter", "suggestion"], "attrs": {}, "data": [[0.03988465636387922], [0.22332127297530738], [93.8337093144598], [0.4288957335526962], [15.200873132842581], [0.06594884418732325], [69.92812304014359], [0.030414213117005793], [0.03934356619106974], [0.04370698902026796], [0.046277075495117295], [0.04379362442186427], [0.06724751026825618], [0.04321570230177384], [0.014854749794268568], [0.023234414678818455], [0.03967220924668919], [42.97981408042776], [0.049053074212024594], [0.04530452470395313]]}}}}
