# Supplementary material
Source: ML conference proceedings conference paper supplement (https://proceedings.neurips.cc/paper_files/paper/2022/hash/31a57804448363bcab777f818f75f5b4-Abstract.html)
Supplement: Supplementary file 1 [file 31a57804448363bcab777f818f75f5b4-Supplemental-Conference.zip › trading_off_resource_budgets_f-Supplementary Material/code_and_data/experiments/base_results/bo_20220228_124924_b7rkpeqg/suggest_log/039e12d5e7f05e1198f405e8b645181e.json]

{"meta": {"args": {"--uuid": "039e12d5e7f05e1198f405e8b645181e", "-db-root": "/home/damon_falck/blackboxbandits/experiments/saved_results", "--opt-root": "/home/damon_falck/blackboxbandits/experiments", "--data-root": "/home/damon_falck/blackboxbandits/experiments/penn_datasets", "--db": "bo_20220228_124924_b7rkpeqg", "--opt": "Scikit-GP-LCB", "--data": "clf-australian", "--classifier": "lasso", "--metric": "nll", "--calls": 20, "--suggestions": 1, "--jobs-file": null, "--verbose": false, "dry_run": false, "rev": "bd14afd", "opt_rev": "0.9.0"}, "signature": [[{"C": 1.5676677195506077, "intercept_scaling": 7.257005721594282}, {"C": 2.57663857461359, "intercept_scaling": 1.5119336467641016}, {"C": 0.49501595537331966, "intercept_scaling": 3.833332156156665}, {"C": 0.5627932047415171, "intercept_scaling": 36.905577292137636}, {"C": 71.55682161754872, "intercept_scaling": 0.34179529120610125}], [0.3603467210684448, 0.3706385692641559, 0.3419143342073922, 0.3433898655358615, 0.4160281039491915]]},
"data": {"coords": {"iter": {"dims": ["iter"], "attrs": {}, "data": [0, 1, 2, 3, 4, 5, 6, 7, 8, 9, 10, 11, 12, 13, 14, 15, 16, 17, 18, 19]}, "suggestion": {"dims": ["suggestion"], "attrs": {}, "data": [0]}}, "attrs": {}, "dims": {"iter": 20, "suggestion": 1}, "data_vars": {"C": {"dims": ["iter", "suggestion"], "attrs": {}, "data": [[0.151480976140162], [0.03261002896745824], [0.20399411788661134], [0.010619583584610322], [0.6169518187197336], [93.49308895378098], [0.9257047630992526], [6.886553384882911], [0.33496965281528884], [0.3142497589232782], [0.27799536844852035], [0.2734167619050683], [0.2739628400514997], [0.2776565600286372], [0.27786846987901337], [0.2666236794006859], [0.2640539231214352], [0.2589417916348295], [0.24927070823272476], [0.2387658783524447]]}, "intercept_scaling": {"dims": ["iter", "suggestion"], "attrs": {}, "data": [[9.163917105157276], [0.22922523847806267], [5.973893431938978], [27.471792120055976], [38.557475812411866], [0.01], [0.01], [100.0], [0.01], [100.0], [0.01], [0.01], [0.01], [0.01], [0.01], [0.01], [0.01], [0.01], [0.01], [0.01]]}}}}
