# Supplementary material
Source: ML conference proceedings conference paper supplement (https://proceedings.neurips.cc/paper_files/paper/2022/hash/31a57804448363bcab777f818f75f5b4-Abstract.html)
Supplement: Supplementary file 1 [file 31a57804448363bcab777f818f75f5b4-Supplemental-Conference.zip › trading_off_resource_budgets_f-Supplementary Material/code_and_data/experiments/base_results/bo_20220228_124924_b7rkpeqg/suggest_log/044bc01c0704518ab6d87e43836381d0.json]

{"meta": {"args": {"--uuid": "044bc01c0704518ab6d87e43836381d0", "-db-root": "/home/damon_falck/blackboxbandits/experiments/saved_results", "--opt-root": "/home/damon_falck/blackboxbandits/experiments", "--data-root": "/home/damon_falck/blackboxbandits/experiments/penn_datasets", "--db": "bo_20220228_124924_b7rkpeqg", "--opt": "HyperOpt", "--data": "reg-644-fri-c4-250-25", "--classifier": "lasso", "--metric": "mse", "--calls": 20, "--suggestions": 1, "--jobs-file": null, "--verbose": false, "dry_run": false, "rev": "bd14afd", "opt_rev": "0.2.7"}, "signature": [[{"alpha": 1.5676677195506077, "fit_intercept": true, "max_iter": 423, "normalize": true, "positive": false, "tol": 0.0038333321561566623}, {"alpha": 0.5627932047415171, "fit_intercept": true, "max_iter": 3989, "normalize": false, "positive": true, "tol": 0.001304907355036239}, {"alpha": 1.871450068624068, "fit_intercept": true, "max_iter": 16, "normalize": false, "positive": false, "tol": 0.021403233140986057}, {"alpha": 12.960656597279737, "fit_intercept": true, "max_iter": 4378, "normalize": true, "positive": false, "tol": 0.013246974647468445}, {"alpha": 0.029723346443356558, "fit_intercept": true, "max_iter": 24, "normalize": true, "positive": true, "tol": 0.00045566719139214756}], [1.0493084416173417, 1.0493084416173417, 1.0493084416173417, 1.0493084416173417, 1.0072190341035177]]},
"data": {"coords": {"iter": {"dims": ["iter"], "attrs": {}, "data": [0, 1, 2, 3, 4, 5, 6, 7, 8, 9, 10, 11, 12, 13, 14, 15, 16, 17, 18, 19]}, "suggestion": {"dims": ["suggestion"], "attrs": {}, "data": [0]}}, "attrs": {}, "dims": {"iter": 20, "suggestion": 1}, "data_vars": {"alpha": {"dims": ["iter", "suggestion"], "attrs": {}, "data": [[0.02112184071030671], [0.8026410588757316], [0.05072227473273096], [0.41425542045673786], [60.00044309687426], [7.894588653789406], [0.4874187172008768], [0.14700151121618846], [0.15707694373757752], [0.1423008363364739], [14.312559088426813], [0.050720829167285784], [9.424278280023621], [0.010367206442718898], [0.3390169930021575], [0.12077140831259875], [0.041049247912151296], [0.0984170802577608], [0.014182214446029224], [18.2366405873621]]}, "fit_intercept": {"dims": ["iter", "suggestion"], "attrs": {}, "data": [[false], [true], [true], [true], [false], [true], [true], [true], [true], [true], [true], [true], [true], [false], [false], [false], [false], [true], [true], [true]]}, "max_iter": {"dims": ["iter", "suggestion"], "attrs": {}, "data": [[103], [45], [1031], [4368], [213], [37], [18], [30], [344], [15], [34], [3097], [313], [4359], [170], [15], [461], [379], [1128], [1629]]}, "normalize": {"dims": ["iter", "suggestion"], "attrs": {}, "data": [[false], [false], [false], [false], [false], [true], [false], [true], [false], [true], [true], [false], [true], [false], [true], [false], [false], [false], [true], [false]]}, "positive": {"dims": ["iter", "suggestion"], "attrs": {}, "data": [[false], [true], [true], [true], [false], [false], [false], [false], [false], [true], [true], [true], [true], [false], [true], [true], [true], [false], [false], [true]]}, "tol": {"dims": ["iter", "suggestion"], "attrs": {}, "data": [[2.2031206171913478e-05], [0.00014471870200688777], [4.2050440114260864e-05], [0.008634186411983944], [0.0018103717444572398], [1.7095980228940553e-05], [4.529306162346469e-05], [5.3021410774523154e-05], [0.0007887097315053779], [0.000625150518370298], [0.06614405755495514], [0.012360004742756586], [0.002840403311859526], [0.006246390507356044], [0.023126342929366293], [0.01443329125464682], [0.0208977106888082], [0.0010961926638373368], [6.272692430121945e-05], [2.98960131535211e-05]]}}}}
