# Supplementary material
Source: ML conference proceedings conference paper supplement (https://proceedings.neurips.cc/paper_files/paper/2022/hash/31a57804448363bcab777f818f75f5b4-Abstract.html)
Supplement: Supplementary file 1 [file 31a57804448363bcab777f818f75f5b4-Supplemental-Conference.zip › trading_off_resource_budgets_f-Supplementary Material/code_and_data/experiments/base_results/bo_20220228_124924_b7rkpeqg/suggest_log/045cea4c9e015490a845609796a28c40.json]

{"meta": {"args": {"--uuid": "045cea4c9e015490a845609796a28c40", "-db-root": "/home/damon_falck/blackboxbandits/experiments/saved_results", "--opt-root": "/home/damon_falck/blackboxbandits/experiments", "--data-root": "/home/damon_falck/blackboxbandits/experiments/penn_datasets", "--db": "bo_20220228_124924_b7rkpeqg", "--opt": "HyperOpt", "--data": "clf-GAMETES-Epistasis-2-Way-20atts-0.4H-EDM-1-1", "--classifier": "lasso", "--metric": "nll", "--calls": 20, "--suggestions": 1, "--jobs-file": null, "--verbose": false, "dry_run": false, "rev": "bd14afd", "opt_rev": "0.2.7"}, "signature": [[{"C": 1.5676677195506077, "intercept_scaling": 7.257005721594282}, {"C": 2.57663857461359, "intercept_scaling": 1.5119336467641016}, {"C": 0.49501595537331966, "intercept_scaling": 3.833332156156665}, {"C": 0.5627932047415171, "intercept_scaling": 36.905577292137636}, {"C": 71.55682161754872, "intercept_scaling": 0.34179529120610125}], [0.7112663722757915, 0.711778999429898, 0.7085201388595034, 0.709150136235003, 0.7128140751729415]]},
"data": {"coords": {"iter": {"dims": ["iter"], "attrs": {}, "data": [0, 1, 2, 3, 4, 5, 6, 7, 8, 9, 10, 11, 12, 13, 14, 15, 16, 17, 18, 19]}, "suggestion": {"dims": ["suggestion"], "attrs": {}, "data": [0]}}, "attrs": {}, "dims": {"iter": 20, "suggestion": 1}, "data_vars": {"C": {"dims": ["iter", "suggestion"], "attrs": {}, "data": [[14.450829108024152], [42.56781445266761], [21.944866390543886], [8.194607655968637], [0.07725382662468433], [1.3665305805222008], [7.717917836582087], [0.04991654501410804], [9.071579095537288], [11.630349067768899], [2.235018641006829], [0.07451121635368065], [2.5246188094098927], [0.015879165182015723], [0.028869495450868612], [30.83924685598543], [23.858055604011152], [7.054064636759251], [50.88421539452656], [0.03426826569987085]]}, "intercept_scaling": {"dims": ["iter", "suggestion"], "attrs": {}, "data": [[20.97584588716183], [0.1206165713386053], [0.24384826887732472], [4.862474530818813], [6.662864088276478], [1.4995302399648867], [68.3955731553452], [12.861618420997269], [5.421097148909844], [9.558453579079378], [46.24417106740702], [0.17933937187045226], [0.07656477271988486], [0.032091465358725264], [0.2810855011488523], [0.05316889706441269], [80.8406939956165], [24.91309093301675], [0.018414823649826915], [23.678444962272394]]}}}}
