# Supplementary material
Source: ML conference proceedings conference paper supplement (https://proceedings.neurips.cc/paper_files/paper/2022/hash/31a57804448363bcab777f818f75f5b4-Abstract.html)
Supplement: Supplementary file 1 [file 31a57804448363bcab777f818f75f5b4-Supplemental-Conference.zip › trading_off_resource_budgets_f-Supplementary Material/code_and_data/experiments/base_results/bo_20220228_124924_b7rkpeqg/suggest_log/0046da4de9c855d593c8f570fd5cf2dd.json]

{"meta": {"args": {"--uuid": "0046da4de9c855d593c8f570fd5cf2dd", "-db-root": "/home/damon_falck/blackboxbandits/experiments/saved_results", "--opt-root": "/home/damon_falck/blackboxbandits/experiments", "--data-root": "/home/damon_falck/blackboxbandits/experiments/penn_datasets", "--db": "bo_20220228_124924_b7rkpeqg", "--opt": "RandomSearch", "--data": "clf-monk3", "--classifier": "MLP-adam", "--metric": "nll", "--calls": 20, "--suggestions": 1, "--jobs-file": null, "--verbose": false, "dry_run": false, "rev": "bd14afd", "opt_rev": "0.0.8"}, "signature": [[{"alpha": 0.019628224813442792, "batch_size": 182, "beta_1": 0.9410202200271762, "beta_2": 0.9998021557676793, "epsilon": 1.8662266976518e-08, "hidden_layer_sizes": 147, "learning_rate_init": 0.0005627932047415167, "tol": 0.03690557729213761, "validation_fraction": 0.8846827852548593}, {"alpha": 0.001998246739232944, "batch_size": 200, "beta_1": 0.919111482530466, "beta_2": 0.9998488260436156, "epsilon": 5.981221901152555e-07, "hidden_layer_sizes": 61, "learning_rate_init": 2.2310905607443014e-05, "tol": 1.2046852412030316e-05, "validation_fraction": 0.8117896445826539}, {"alpha": 0.46659545670218433, "batch_size": 219, "beta_1": 0.9889789783750891, "beta_2": 0.9999896868093284, "epsilon": 2.4234724484675948e-08, "hidden_layer_sizes": 167, "learning_rate_init": 2.972334644335654e-05, "tol": 0.0036281404040243792, "validation_fraction": 0.17260651658522078}, {"alpha": 4.656005689076002, "batch_size": 135, "beta_1": 0.870503881627747, "beta_2": 0.9948873266941017, "epsilon": 2.1023308743480125e-07, "hidden_layer_sizes": 118, "learning_rate_init": 0.001878173875716191, "tol": 1.1889379831773006e-05, "validation_fraction": 0.6264327093752792}, {"alpha": 0.04705159350400542, "batch_size": 158, "beta_1": 0.9870884262730957, "beta_2": 0.9999596874382349, "epsilon": 1.1981845126013875e-08, "hidden_layer_sizes": 116, "learning_rate_init": 0.006173405204074311, "tol": 1.7414134181586194e-05, "validation_fraction": 0.6754299026638921}], [0.6536258300465742, 0.7387563572768684, 0.819427783028161, 0.23683424631147404, 0.2990695595012716]]},
"data": {"coords": {"iter": {"dims": ["iter"], "attrs": {}, "data": [0, 1, 2, 3, 4, 5, 6, 7, 8, 9, 10, 11, 12, 13, 14, 15, 16, 17, 18, 19]}, "suggestion": {"dims": ["suggestion"], "attrs": {}, "data": [0]}}, "attrs": {}, "dims": {"iter": 20, "suggestion": 1}, "data_vars": {"alpha": {"dims": ["iter", "suggestion"], "attrs": {}, "data": [[7.536340437960599], [1.5147028435124408], [6.309582057888582], [6.050753518056275e-05], [0.016400174869579936], [3.56594661012759], [0.002006234115668356], [0.00016364572152557087], [0.1520109816796481], [1.8799320196607216e-05], [0.07093581898316369], [0.08544668758446852], [0.0043324281015695324], [0.0003961249833992171], [0.000559493095050905], [0.3778880327727449], [0.0008561511661761294], [0.12822019029173173], [0.0756012354812912], [0.0026391972911529713]]}, "batch_size": {"dims": ["iter", "suggestion"], "attrs": {}, "data": [[180], [106], [124], [101], [211], [89], [234], [236], [180], [140], [95], [160], [225], [123], [233], [138], [51], [204], [73], [59]]}, "beta_1": {"dims": ["iter", "suggestion"], "attrs": {}, "data": [[0.9755049430006184], [0.7922003115342754], [0.9387406814999156], [0.9890191254888713], [0.9289149660379117], [0.9076568093239684], [0.9859769445738765], [0.5166862706538736], [0.6173965247650745], [0.7153196999452939], [0.8111326396848921], [0.536504550083721], [0.586603095568594], [0.7445356482932913], [0.7346949104344862], [0.9800026238870269], [0.9896894775223493], [0.8311060640818738], [0.9783166796236943], [0.8809479054275093]]}, "beta_2": {"dims": ["iter", "suggestion"], "attrs": {}, "data": [[0.9998548602124356], [0.9996992677302399], [0.9953538138893845], [0.9824967331029612], [0.9966797922053903], [0.9813158760622164], [0.9916933497031184], [0.9998938151534279], [0.9957282740220159], [0.9999891322330478], [0.9999960947501793], [0.9930251269199659], [0.9999952932288652], [0.9999802307666134], [0.9998429762048796], [0.9993534509468447], [0.9996998207304741], [0.9997116010493939], [0.9999927656699108], [0.9999879176694239]]}, "epsilon": {"dims": ["iter", "suggestion"], "attrs": {}, "data": [[6.372417437909865e-08], [5.715402000244287e-07], [1.9342808227000313e-09], [6.5148284063613744e-09], [1.4428491817863672e-09], [1.6115674625623437e-08], [2.6704290374368666e-08], [4.959956668244884e-09], [2.0163114329889303e-09], [2.1949227040337302e-07], [1.8486155147812084e-08], [9.3688391640737e-08], [1.5969145872212344e-08], [1.5573490959417226e-08], [9.665449661375002e-07], [5.7066531548468197e-08], [1.3846909934792467e-09], [1.4991388203602854e-07], [1.4366583039212877e-08], [3.871955163285385e-08]]}, "hidden_layer_sizes": {"dims": ["iter", "suggestion"], "attrs": {}, "data": [[100], [57], [158], [68], [69], [87], [71], [74], [78], [175], [189], [92], [75], [76], [103], [73], [59], [118], [181], [162]]}, "learning_rate_init": {"dims": ["iter", "suggestion"], "attrs": {}, "data": [[0.051850229449252126], [0.00034898747928544714], [1.5765361169508508e-05], [0.004371174565586955], [2.880947795414549e-05], [1.8573414061365334e-05], [5.7713738439990106e-05], [0.017557782409009928], [0.0007525695427074774], [0.03826128028603761], [2.6749252466632524e-05], [2.5844714522749146e-05], [0.001159813980100031], [0.00017554685695062697], [0.0010913793239332174], [0.004771792377332345], [3.0117581955253596e-05], [0.0017976360335843836], [0.011770374527684752], [0.00014724530194795972]]}, "tol": {"dims": ["iter", "suggestion"], "attrs": {}, "data": [[0.00011279736888909318], [0.042431018633101274], [0.0016201691218293613], [6.031570604197061e-05], [0.0009195332072317001], [0.001668100504226553], [0.00010452819420384849], [0.05510267441426924], [2.1975332389638758e-05], [0.0016197787841210087], [0.0352416221064546], [0.011287112492190015], [0.009184638522064626], [0.012852788895583908], [0.00019888422098087195], [5.4676295847721914e-05], [0.0008876635228271772], [0.00016652330271766736], [0.0008288765195362448], [0.05574241912994606]]}, "validation_fraction": {"dims": ["iter", "suggestion"], "attrs": {}, "data": [[0.5747161335893185], [0.243786341822379], [0.7008815857739995], [0.7822063489855468], [0.37618817832871576], [0.4003965414171589], [0.21196553209758073], [0.18062430621353043], [0.16220667927926957], [0.22350571404678993], [0.8852666044235772], [0.23287029556338723], [0.3446002146628296], [0.16331912240721833], [0.7120837314138889], [0.4160230238573915], [0.21056503280285988], [0.4960711952738581], [0.1396200037804344], [0.7487448032869932]]}}}}
