# Supplementary material
Source: ML conference proceedings conference paper supplement (https://proceedings.neurips.cc/paper_files/paper/2022/hash/31a57804448363bcab777f818f75f5b4-Abstract.html)
Supplement: Supplementary file 1 [file 31a57804448363bcab777f818f75f5b4-Supplemental-Conference.zip › trading_off_resource_budgets_f-Supplementary Material/code_and_data/experiments/base_results/bo_20220228_124924_b7rkpeqg/suggest_log/048e8b8395b45943bde8d98f1da30cdc.json]

{"meta": {"args": {"--uuid": "048e8b8395b45943bde8d98f1da30cdc", "-db-root": "/home/damon_falck/blackboxbandits/experiments/saved_results", "--opt-root": "/home/damon_falck/blackboxbandits/experiments", "--data-root": "/home/damon_falck/blackboxbandits/experiments/penn_datasets", "--db": "bo_20220228_124924_b7rkpeqg", "--opt": "HyperOpt", "--data": "clf-Hill-Valley-without-noise", "--classifier": "MLP-adam", "--metric": "nll", "--calls": 20, "--suggestions": 1, "--jobs-file": null, "--verbose": false, "dry_run": false, "rev": "bd14afd", "opt_rev": "0.2.7"}, "signature": [[{"alpha": 0.019628224813442792, "batch_size": 182, "beta_1": 0.9410202200271762, "beta_2": 0.9998021557676793, "epsilon": 1.8662266976518e-08, "hidden_layer_sizes": 147, "learning_rate_init": 0.0005627932047415167, "tol": 0.03690557729213761, "validation_fraction": 0.8846827852548593}, {"alpha": 0.001998246739232944, "batch_size": 200, "beta_1": 0.919111482530466, "beta_2": 0.9998488260436156, "epsilon": 5.981221901152555e-07, "hidden_layer_sizes": 61, "learning_rate_init": 2.2310905607443014e-05, "tol": 1.2046852412030316e-05, "validation_fraction": 0.8117896445826539}, {"alpha": 0.46659545670218433, "batch_size": 219, "beta_1": 0.9889789783750891, "beta_2": 0.9999896868093284, "epsilon": 2.4234724484675948e-08, "hidden_layer_sizes": 167, "learning_rate_init": 2.972334644335654e-05, "tol": 0.0036281404040243792, "validation_fraction": 0.17260651658522078}, {"alpha": 4.656005689076002, "batch_size": 135, "beta_1": 0.870503881627747, "beta_2": 0.9948873266941017, "epsilon": 2.1023308743480125e-07, "hidden_layer_sizes": 118, "learning_rate_init": 0.001878173875716191, "tol": 1.1889379831773006e-05, "validation_fraction": 0.6264327093752792}, {"alpha": 0.04705159350400542, "batch_size": 158, "beta_1": 0.9870884262730957, "beta_2": 0.9999596874382349, "epsilon": 1.1981845126013875e-08, "hidden_layer_sizes": 116, "learning_rate_init": 0.006173405204074311, "tol": 1.7414134181586194e-05, "validation_fraction": 0.6754299026638921}], [0.7547227075106365, 0.8425366991908654, 0.7064507377956198, 0.7076520830401882, 0.8216265976234706]]},
"data": {"coords": {"iter": {"dims": ["iter"], "attrs": {}, "data": [0, 1, 2, 3, 4, 5, 6, 7, 8, 9, 10, 11, 12, 13, 14, 15, 16, 17, 18, 19]}, "suggestion": {"dims": ["suggestion"], "attrs": {}, "data": [0]}}, "attrs": {}, "dims": {"iter": 20, "suggestion": 1}, "data_vars": {"alpha": {"dims": ["iter", "suggestion"], "attrs": {}, "data": [[0.0011363734550394304], [0.000999036999187631], [0.00030191437194147666], [0.00827403780820414], [0.001232582642475881], [0.002244270715435993], [1.3023438606730415], [0.02047806560870916], [0.0004698089438356411], [0.3464749033040119], [0.00016379506979609655], [0.025451130490805197], [0.0012675236431518514], [1.92774122000818e-05], [0.009209917137806832], [0.002504841070163285], [8.072956197436645e-05], [3.047837541379893], [0.000980508874265648], [0.8463727782782092]]}, "batch_size": {"dims": ["iter", "suggestion"], "attrs": {}, "data": [[108], [116], [228], [48], [187], [240], [149], [28], [63], [149], [110], [233], [103], [218], [59], [49], [134], [153], [207], [172]]}, "beta_1": {"dims": ["iter", "suggestion"], "attrs": {}, "data": [[0.5652843390641834], [0.513208193694672], [0.9041430340303903], [0.8174923950144216], [0.6091849847263381], [0.6157792281629761], [0.5824492861304627], [0.8194841816465097], [0.5747234035220802], [0.5330329505825425], [0.5858953597565945], [0.7056607542959384], [0.657010396372805], [0.7033263018545423], [0.7726447272165909], [0.5818076601166887], [0.8933035824755151], [0.8615607280199479], [0.5900795476609179], [0.7377623044887852]]}, "beta_2": {"dims": ["iter", "suggestion"], "attrs": {}, "data": [[0.9953162526788369], [0.9739072659926732], [0.9329023283192749], [0.939609748361731], [0.9018481666899892], [0.9204546621750095], [0.9885000517596172], [0.9148577441298021], [0.9913591005476096], [0.9394210114941834], [0.9255915737544738], [0.9249565185006957], [0.9227705273482343], [0.9661845806186383], [0.9621991203100632], [0.9115563466887776], [0.9652811485871726], [0.9030834857717248], [0.9233364804270675], [0.9146660256929156]]}, "epsilon": {"dims": ["iter", "suggestion"], "attrs": {}, "data": [[1.2003461719534325e-08], [1.8579205733131168e-09], [7.528737307652323e-08], [1.5966056901209143e-09], [3.4297252123343814e-07], [8.869970421681651e-09], [2.457813883822368e-08], [2.8773704386499647e-08], [2.4903170644698548e-09], [7.647629989845873e-07], [1.6849417366466743e-07], [1.569616563492836e-09], [1.6184360840802846e-07], [3.47879920616995e-08], [6.877817604176581e-07], [1.0997850132481444e-09], [7.911739608793586e-08], [1.9451809071656216e-09], [2.8562770462977874e-08], [1.5124714752509082e-07]]}, "hidden_layer_sizes": {"dims": ["iter", "suggestion"], "attrs": {}, "data": [[192], [53], [100], [102], [105], [135], [116], [95], [114], [109], [134], [154], [63], [170], [129], [125], [105], [68], [158], [183]]}, "learning_rate_init": {"dims": ["iter", "suggestion"], "attrs": {}, "data": [[0.00048582691604718165], [0.0003194654708740653], [0.0007867871060251274], [0.0006566339178177894], [0.028550812425115382], [0.016836012573951644], [0.0002237579284501118], [0.00016129425274417444], [6.617149611532794e-05], [3.898959764709773e-05], [0.004383676970630561], [0.0004504368956171947], [0.0002596393512772374], [0.006786490569466788], [0.009641854107225033], [0.0042558889810549285], [2.2736668232219715e-05], [0.05672382086457609], [0.009876032567412528], [2.5951318707123537e-05]]}, "tol": {"dims": ["iter", "suggestion"], "attrs": {}, "data": [[0.011278548555195961], [0.002526908387022451], [0.0025620454937445576], [0.00013235341054505548], [1.967013686434632e-05], [0.060530416503172264], [3.6494870298174964e-05], [1.8377437081666555e-05], [0.03838591392087904], [0.06572767017271693], [0.09913758414844376], [0.01010797487832319], [0.0001854008941999668], [0.08752205267526081], [0.00017081745047439553], [6.920853669314234e-05], [0.00015306284989488367], [0.006171181377336493], [0.0010063422196058005], [0.004420102025758071]]}, "validation_fraction": {"dims": ["iter", "suggestion"], "attrs": {}, "data": [[0.2328220674320256], [0.16450235907515592], [0.16145472678690623], [0.5188075870081812], [0.2923461970192286], [0.7176579940690191], [0.10674632557539489], [0.5123381072560976], [0.5973387155409234], [0.10233232961816623], [0.5413203865771528], [0.10184994204795886], [0.26994729465674716], [0.6744126876995338], [0.6950954632266445], [0.10748799563634584], [0.6638168659210724], [0.7623794509403079], [0.10508408158686469], [0.21296960979279336]]}}}}
