# Supplementary material
Source: ML conference proceedings conference paper supplement (https://proceedings.neurips.cc/paper_files/paper/2022/hash/31a57804448363bcab777f818f75f5b4-Abstract.html)
Supplement: Supplementary file 1 [file 31a57804448363bcab777f818f75f5b4-Supplemental-Conference.zip › trading_off_resource_budgets_f-Supplementary Material/code_and_data/experiments/base_results/bo_20220228_124924_b7rkpeqg/suggest_log/049c45915d75585cba6d636c2c2566a6.json]

{"meta": {"args": {"--uuid": "049c45915d75585cba6d636c2c2566a6", "-db-root": "/home/damon_falck/blackboxbandits/experiments/saved_results", "--opt-root": "/home/damon_falck/blackboxbandits/experiments", "--data-root": "/home/damon_falck/blackboxbandits/experiments/penn_datasets", "--db": "bo_20220228_124924_b7rkpeqg", "--opt": "Scikit-GBRT-Hedge", "--data": "clf-pendigits", "--classifier": "lasso", "--metric": "nll", "--calls": 20, "--suggestions": 1, "--jobs-file": null, "--verbose": false, "dry_run": false, "rev": "bd14afd", "opt_rev": "0.9.0"}, "signature": [[{"C": 1.5676677195506077, "intercept_scaling": 7.257005721594282}, {"C": 2.57663857461359, "intercept_scaling": 1.5119336467641016}, {"C": 0.49501595537331966, "intercept_scaling": 3.833332156156665}, {"C": 0.5627932047415171, "intercept_scaling": 36.905577292137636}, {"C": 71.55682161754872, "intercept_scaling": 0.34179529120610125}], [0.26296161632462034, 0.26214243793253567, 0.2710617658733042, 0.26881110266329455, 0.2600583846357505]]},
"data": {"coords": {"iter": {"dims": ["iter"], "attrs": {}, "data": [0, 1, 2, 3, 4, 5, 6, 7, 8, 9, 10, 11, 12, 13, 14, 15, 16, 17, 18, 19]}, "suggestion": {"dims": ["suggestion"], "attrs": {}, "data": [0]}}, "attrs": {}, "dims": {"iter": 20, "suggestion": 1}, "data_vars": {"C": {"dims": ["iter", "suggestion"], "attrs": {}, "data": [[0.0466441990192461], [0.017263459669021722], [39.85711796577828], [0.4013980696630117], [3.26700002844156], [33.5346255768219], [24.572634931647684], [30.51276687603874], [13.244962504997831], [56.10988033572808], [0.012482402745306664], [0.010063024861744105], [25.254202311660276], [88.42571860392125], [67.07812442846172], [61.162972839970365], [7.381930107664864], [15.907807566845593], [14.406033615144851], [0.010144505723425882]]}, "intercept_scaling": {"dims": ["iter", "suggestion"], "attrs": {}, "data": [[2.8213552746830586], [61.88924311734494], [0.13355652920368724], [7.498190006776443], [0.021812451725492836], [33.189458269266595], [38.79891116339249], [44.169329775938124], [38.24788205259451], [59.006154730250955], [70.627987667043], [73.03210281800192], [36.017147416367855], [38.397357159977474], [40.02373507658333], [82.53992232819239], [9.322674860393429], [2.536052371706032], [11.653481159989417], [76.67021801500937]]}}}}
