# Supplementary material
Source: ML conference proceedings conference paper supplement (https://proceedings.neurips.cc/paper_files/paper/2022/hash/31a57804448363bcab777f818f75f5b4-Abstract.html)
Supplement: Supplementary file 1 [file 31a57804448363bcab777f818f75f5b4-Supplemental-Conference.zip › trading_off_resource_budgets_f-Supplementary Material/code_and_data/experiments/base_results/bo_20220228_124924_b7rkpeqg/suggest_log/049fc43e299c5f7ba019556cf563338c.json]

{"meta": {"args": {"--uuid": "049fc43e299c5f7ba019556cf563338c", "-db-root": "/home/damon_falck/blackboxbandits/experiments/saved_results", "--opt-root": "/home/damon_falck/blackboxbandits/experiments", "--data-root": "/home/damon_falck/blackboxbandits/experiments/penn_datasets", "--db": "bo_20220228_124924_b7rkpeqg", "--opt": "Scikit-GP-LCB", "--data": "clf-credit-a", "--classifier": "MLP-adam", "--metric": "nll", "--calls": 20, "--suggestions": 1, "--jobs-file": null, "--verbose": false, "dry_run": false, "rev": "bd14afd", "opt_rev": "0.9.0"}, "signature": [[{"alpha": 0.019628224813442792, "batch_size": 182, "beta_1": 0.9410202200271762, "beta_2": 0.9998021557676793, "epsilon": 1.8662266976518e-08, "hidden_layer_sizes": 147, "learning_rate_init": 0.0005627932047415167, "tol": 0.03690557729213761, "validation_fraction": 0.8846827852548593}, {"alpha": 0.001998246739232944, "batch_size": 200, "beta_1": 0.919111482530466, "beta_2": 0.9998488260436156, "epsilon": 5.981221901152555e-07, "hidden_layer_sizes": 61, "learning_rate_init": 2.2310905607443014e-05, "tol": 1.2046852412030316e-05, "validation_fraction": 0.8117896445826539}, {"alpha": 0.46659545670218433, "batch_size": 219, "beta_1": 0.9889789783750891, "beta_2": 0.9999896868093284, "epsilon": 2.4234724484675948e-08, "hidden_layer_sizes": 167, "learning_rate_init": 2.972334644335654e-05, "tol": 0.0036281404040243792, "validation_fraction": 0.17260651658522078}, {"alpha": 4.656005689076002, "batch_size": 135, "beta_1": 0.870503881627747, "beta_2": 0.9948873266941017, "epsilon": 2.1023308743480125e-07, "hidden_layer_sizes": 118, "learning_rate_init": 0.001878173875716191, "tol": 1.1889379831773006e-05, "validation_fraction": 0.6264327093752792}, {"alpha": 0.04705159350400542, "batch_size": 158, "beta_1": 0.9870884262730957, "beta_2": 0.9999596874382349, "epsilon": 1.1981845126013875e-08, "hidden_layer_sizes": 116, "learning_rate_init": 0.006173405204074311, "tol": 1.7414134181586194e-05, "validation_fraction": 0.6754299026638921}], [0.5769614506444269, 0.6821126997033388, 0.6883756550447682, 0.38825641255213594, 0.41904813698898347]]},
"data": {"coords": {"iter": {"dims": ["iter"], "attrs": {}, "data": [0, 1, 2, 3, 4, 5, 6, 7, 8, 9, 10, 11, 12, 13, 14, 15, 16, 17, 18, 19]}, "suggestion": {"dims": ["suggestion"], "attrs": {}, "data": [0]}}, "attrs": {}, "dims": {"iter": 20, "suggestion": 1}, "data_vars": {"alpha": {"dims": ["iter", "suggestion"], "attrs": {}, "data": [[0.00241336792406323], [0.0312843765401887], [7.434152720927055], [0.003731782921305249], [0.00023453128586721413], [0.013550397680627652], [0.00038403468677706117], [0.00024656921935950813], [3.807711720932358e-05], [0.03888382076643895], [10.0], [0.0016997854381017297], [0.0011191092455406543], [10.0], [1e-05], [1e-05], [1e-05], [1e-05], [1e-05], [1e-05]]}, "batch_size": {"dims": ["iter", "suggestion"], "attrs": {}, "data": [[136], [153], [35], [39], [84], [160], [107], [30], [79], [36], [250], [47], [250], [15], [250], [170], [10], [82], [250], [91]]}, "beta_1": {"dims": ["iter", "suggestion"], "attrs": {}, "data": [[0.7008948887060255], [0.6987007482397258], [0.8179313799476939], [0.9453016020395415], [0.7331879622163243], [0.9626744642476688], [0.5582501781654187], [0.7637986322919774], [0.7130621668527017], [0.8052175587388792], [0.5], [0.8935398018622134], [0.5], [0.5], [0.5], [0.8626855505785069], [0.99], [0.5], [0.7844257648162666], [0.99]]}, "beta_2": {"dims": ["iter", "suggestion"], "attrs": {}, "data": [[0.9718515839467213], [0.9061686243624966], [0.986138671123355], [0.9512733500632892], [0.9458705479060727], [0.993006974203024], [0.999915717366863], [0.9194304044641295], [0.9400944399141262], [0.9982861982361486], [0.9], [0.9932323317876496], [0.9309316288350887], [0.9536493380012503], [0.9], [0.904915322628068], [0.9637016688974483], [0.948425154404306], [0.999999], [0.926391587548209]]}, "epsilon": {"dims": ["iter", "suggestion"], "attrs": {}, "data": [[8.635531588077389e-07], [6.307408811614485e-09], [1.9131049579794047e-09], [1.0537247985764631e-09], [3.5809275815554733e-07], [8.241685858392324e-07], [1e-09], [5.4267144714603675e-09], [1e-09], [6.113214372035023e-09], [1e-06], [4.011659574111554e-09], [6.474363267466741e-08], [1e-09], [6.554204687678727e-07], [4.0443608306565095e-07], [1.0174596075293292e-08], [3.809371921118481e-07], [1e-09], [6.372969757344181e-08]]}, "hidden_layer_sizes": {"dims": ["iter", "suggestion"], "attrs": {}, "data": [[183], [109], [52], [100], [191], [190], [69], [177], [136], [134], [200], [144], [50], [200], [50], [83], [200], [91], [50], [166]]}, "learning_rate_init": {"dims": ["iter", "suggestion"], "attrs": {}, "data": [[2.7137714469157517e-05], [0.004706761541773522], [0.0014685413734364797], [0.00036833930893000953], [0.00017530705733266288], [8.235229195771587e-05], [0.0015726626287187431], [0.007852321633660519], [0.030584776568363198], [0.05799401035563623], [1e-05], [0.0016462716224026346], [0.009010930981899165], [0.0018486988022023334], [0.002871077354560794], [0.028320599270043902], [0.0012981753610912911], [0.0005827012628392029], [8.990535313763181e-05], [0.0021425012613649234]]}, "tol": {"dims": ["iter", "suggestion"], "attrs": {}, "data": [[4.7929516513210554e-05], [0.0010795093801027208], [0.0007728270555437953], [0.06995725677070876], [1.284739494760942e-05], [0.03050145304245697], [0.00014560183700609584], [0.03271088163081732], [0.00015094364901747118], [0.0004752628192352208], [1e-05], [0.0005323207772155701], [0.058457473760196194], [1e-05], [0.04703172971279726], [1.2222479851284822e-05], [0.011740350007196912], [6.459588348372154e-05], [0.004632152220905461], [0.1]]}, "validation_fraction": {"dims": ["iter", "suggestion"], "attrs": {}, "data": [[0.3897303972229655], [0.5546696988737185], [0.869431798561103], [0.13111107564110844], [0.12931553025243403], [0.6779337300431798], [0.23196897348421977], [0.2772364906872472], [0.7202073757230685], [0.35119751753348394], [0.1], [0.1736023395251693], [0.1], [0.1], [0.1], [0.1], [0.9], [0.1713438917898451], [0.1], [0.3248716008882072]]}}}}
