# Supplementary material
Source: ML conference proceedings conference paper supplement (https://proceedings.neurips.cc/paper_files/paper/2022/hash/31a57804448363bcab777f818f75f5b4-Abstract.html)
Supplement: Supplementary file 1 [file 31a57804448363bcab777f818f75f5b4-Supplemental-Conference.zip › trading_off_resource_budgets_f-Supplementary Material/code_and_data/experiments/base_results/bo_20220228_124924_b7rkpeqg/suggest_log/056da451151254ce86d2319fa002f1ce.json]

{"meta": {"args": {"--uuid": "056da451151254ce86d2319fa002f1ce", "-db-root": "/home/damon_falck/blackboxbandits/experiments/saved_results", "--opt-root": "/home/damon_falck/blackboxbandits/experiments", "--data-root": "/home/damon_falck/blackboxbandits/experiments/penn_datasets", "--db": "bo_20220228_124924_b7rkpeqg", "--opt": "Scikit-GP-LCB", "--data": "clf-waveform-21", "--classifier": "MLP-adam", "--metric": "nll", "--calls": 20, "--suggestions": 1, "--jobs-file": null, "--verbose": false, "dry_run": false, "rev": "bd14afd", "opt_rev": "0.9.0"}, "signature": [[{"alpha": 0.019628224813442792, "batch_size": 182, "beta_1": 0.9410202200271762, "beta_2": 0.9998021557676793, "epsilon": 1.8662266976518e-08, "hidden_layer_sizes": 147, "learning_rate_init": 0.0005627932047415167, "tol": 0.03690557729213761, "validation_fraction": 0.8846827852548593}, {"alpha": 0.001998246739232944, "batch_size": 200, "beta_1": 0.919111482530466, "beta_2": 0.9998488260436156, "epsilon": 5.981221901152555e-07, "hidden_layer_sizes": 61, "learning_rate_init": 2.2310905607443014e-05, "tol": 1.2046852412030316e-05, "validation_fraction": 0.8117896445826539}, {"alpha": 0.46659545670218433, "batch_size": 219, "beta_1": 0.9889789783750891, "beta_2": 0.9999896868093284, "epsilon": 2.4234724484675948e-08, "hidden_layer_sizes": 167, "learning_rate_init": 2.972334644335654e-05, "tol": 0.0036281404040243792, "validation_fraction": 0.17260651658522078}, {"alpha": 4.656005689076002, "batch_size": 135, "beta_1": 0.870503881627747, "beta_2": 0.9948873266941017, "epsilon": 2.1023308743480125e-07, "hidden_layer_sizes": 118, "learning_rate_init": 0.001878173875716191, "tol": 1.1889379831773006e-05, "validation_fraction": 0.6264327093752792}, {"alpha": 0.04705159350400542, "batch_size": 158, "beta_1": 0.9870884262730957, "beta_2": 0.9999596874382349, "epsilon": 1.1981845126013875e-08, "hidden_layer_sizes": 116, "learning_rate_init": 0.006173405204074311, "tol": 1.7414134181586194e-05, "validation_fraction": 0.6754299026638921}], [0.6295258842930568, 0.9750609451301061, 0.5553357556428726, 0.3461010388918074, 0.3582994384578376]]},
"data": {"coords": {"iter": {"dims": ["iter"], "attrs": {}, "data": [0, 1, 2, 3, 4, 5, 6, 7, 8, 9, 10, 11, 12, 13, 14, 15, 16, 17, 18, 19]}, "suggestion": {"dims": ["suggestion"], "attrs": {}, "data": [0]}}, "attrs": {}, "dims": {"iter": 20, "suggestion": 1}, "data_vars": {"alpha": {"dims": ["iter", "suggestion"], "attrs": {}, "data": [[0.6506987849330809], [0.0014878143478095048], [0.4830067826940033], [1.989753677452719e-05], [1.0190511893320076], [0.0013999273941106265], [10.0], [10.0], [10.0], [10.0], [1e-05], [10.0], [0.04181404265522764], [0.004353201618537007], [0.0012709348124672554], [1e-05], [10.0], [1e-05], [0.004898692348611254], [0.00019192375087446442]]}, "batch_size": {"dims": ["iter", "suggestion"], "attrs": {}, "data": [[178], [102], [114], [88], [155], [22], [41], [250], [250], [109], [40], [250], [250], [10], [250], [10], [206], [250], [10], [250]]}, "beta_1": {"dims": ["iter", "suggestion"], "attrs": {}, "data": [[0.8649318619643203], [0.523536295700077], [0.6203028131066591], [0.6757628986133482], [0.5349840918974591], [0.9114741593553858], [0.753962971352971], [0.5], [0.5], [0.5], [0.5], [0.99], [0.99], [0.5030505920851502], [0.5], [0.6313105974940496], [0.6349959559788566], [0.7751470168362158], [0.5], [0.5]]}, "beta_2": {"dims": ["iter", "suggestion"], "attrs": {}, "data": [[0.9110436289918776], [0.9128573697730603], [0.9213121720361034], [0.9295938837364439], [0.9331144335034625], [0.9206397439385612], [0.9275371672089223], [0.999999], [0.999999], [0.9851464241066082], [0.9], [0.999999], [0.9869979621271084], [0.999999], [0.999999], [0.999999], [0.9], [0.999999], [0.9], [0.956198521478712]]}, "epsilon": {"dims": ["iter", "suggestion"], "attrs": {}, "data": [[2.336683141045467e-08], [3.977479740403384e-09], [3.719631392265325e-07], [3.9006697532280313e-07], [7.037190878172773e-08], [1e-09], [1e-06], [1e-09], [1e-06], [4.671155225175898e-08], [1e-09], [9.78184814863336e-09], [1.0926171035047835e-09], [3.9593947300484386e-09], [1.5105726908924048e-07], [1e-06], [3.3557420947888765e-07], [1e-06], [1e-06], [1.0333299717346453e-07]]}, "hidden_layer_sizes": {"dims": ["iter", "suggestion"], "attrs": {}, "data": [[171], [87], [69], [150], [132], [194], [78], [50], [50], [50], [50], [200], [178], [50], [180], [200], [87], [50], [54], [56]]}, "learning_rate_init": {"dims": ["iter", "suggestion"], "attrs": {}, "data": [[0.00032891058390456193], [0.0606634640642743], [0.005858908493452698], [0.010487563243849678], [0.0003022051770035403], [1e-05], [1e-05], [0.0010334786493118352], [0.1], [0.005879153181665344], [7.927256798857715e-05], [1e-05], [1e-05], [0.0006692543973714994], [0.0040174287279196716], [1e-05], [0.1], [0.1], [9.782375627708368e-05], [1e-05]]}, "tol": {"dims": ["iter", "suggestion"], "attrs": {}, "data": [[3.343535453642556e-05], [0.002037387296367005], [2.9863556864146685e-05], [7.092252254389238e-05], [0.05094142040768316], [0.0007027943040692124], [2.8104777449699515e-05], [0.1], [0.1], [0.1], [0.044909692699885734], [0.1], [0.0013560588253381887], [0.1], [0.1], [1e-05], [0.009845839393389202], [0.1], [0.032684459307762086], [0.0041762652787865305]]}, "validation_fraction": {"dims": ["iter", "suggestion"], "attrs": {}, "data": [[0.6644139518270682], [0.19736103377279998], [0.5841837154651383], [0.560787548433842], [0.15445791007900989], [0.32692195488735126], [0.9], [0.12032997005217437], [0.1], [0.1], [0.11181761163554516], [0.1], [0.14022626204512156], [0.44718731450045807], [0.1], [0.9], [0.277811712103599], [0.1], [0.12619664928888008], [0.14089499257010993]]}}}}
