# Supplementary material
Source: ML conference proceedings conference paper supplement (https://proceedings.neurips.cc/paper_files/paper/2022/hash/31a57804448363bcab777f818f75f5b4-Abstract.html)
Supplement: Supplementary file 1 [file 31a57804448363bcab777f818f75f5b4-Supplemental-Conference.zip › trading_off_resource_budgets_f-Supplementary Material/code_and_data/experiments/base_results/bo_20220228_124924_b7rkpeqg/suggest_log/0060d88c47ab5518909474c0af8a71a6.json]

{"meta": {"args": {"--uuid": "0060d88c47ab5518909474c0af8a71a6", "-db-root": "/home/damon_falck/blackboxbandits/experiments/saved_results", "--opt-root": "/home/damon_falck/blackboxbandits/experiments", "--data-root": "/home/damon_falck/blackboxbandits/experiments/penn_datasets", "--db": "bo_20220228_124924_b7rkpeqg", "--opt": "Scikit-GBRT-Hedge", "--data": "clf-monk3", "--classifier": "MLP-adam", "--metric": "nll", "--calls": 20, "--suggestions": 1, "--jobs-file": null, "--verbose": false, "dry_run": false, "rev": "bd14afd", "opt_rev": "0.9.0"}, "signature": [[{"alpha": 0.019628224813442792, "batch_size": 182, "beta_1": 0.9410202200271762, "beta_2": 0.9998021557676793, "epsilon": 1.8662266976518e-08, "hidden_layer_sizes": 147, "learning_rate_init": 0.0005627932047415167, "tol": 0.03690557729213761, "validation_fraction": 0.8846827852548593}, {"alpha": 0.001998246739232944, "batch_size": 200, "beta_1": 0.919111482530466, "beta_2": 0.9998488260436156, "epsilon": 5.981221901152555e-07, "hidden_layer_sizes": 61, "learning_rate_init": 2.2310905607443014e-05, "tol": 1.2046852412030316e-05, "validation_fraction": 0.8117896445826539}, {"alpha": 0.46659545670218433, "batch_size": 219, "beta_1": 0.9889789783750891, "beta_2": 0.9999896868093284, "epsilon": 2.4234724484675948e-08, "hidden_layer_sizes": 167, "learning_rate_init": 2.972334644335654e-05, "tol": 0.0036281404040243792, "validation_fraction": 0.17260651658522078}, {"alpha": 4.656005689076002, "batch_size": 135, "beta_1": 0.870503881627747, "beta_2": 0.9948873266941017, "epsilon": 2.1023308743480125e-07, "hidden_layer_sizes": 118, "learning_rate_init": 0.001878173875716191, "tol": 1.1889379831773006e-05, "validation_fraction": 0.6264327093752792}, {"alpha": 0.04705159350400542, "batch_size": 158, "beta_1": 0.9870884262730957, "beta_2": 0.9999596874382349, "epsilon": 1.1981845126013875e-08, "hidden_layer_sizes": 116, "learning_rate_init": 0.006173405204074311, "tol": 1.7414134181586194e-05, "validation_fraction": 0.6754299026638921}], [0.6536258300465742, 0.7387563572768684, 0.819427783028161, 0.23683424631147404, 0.2990695595012716]]},
"data": {"coords": {"iter": {"dims": ["iter"], "attrs": {}, "data": [0, 1, 2, 3, 4, 5, 6, 7, 8, 9, 10, 11, 12, 13, 14, 15, 16, 17, 18, 19]}, "suggestion": {"dims": ["suggestion"], "attrs": {}, "data": [0]}}, "attrs": {}, "dims": {"iter": 20, "suggestion": 1}, "data_vars": {"alpha": {"dims": ["iter", "suggestion"], "attrs": {}, "data": [[0.0025544895795394994], [0.26927774259540915], [0.0011248002726747602], [0.00019667345309736902], [0.18502664965804252], [0.22994722205878856], [0.8693787370450685], [0.3795796630943488], [4.484626837185989], [2.9905478948611024], [0.008918890728765895], [0.0003893145599064246], [0.02155073622474055], [1.5220097139936831e-05], [1.0759084355147528e-05], [0.0006776664324482599], [0.3192853477516506], [2.1531102630270707e-05], [0.0004128762014505994], [0.0003897739245361279]]}, "batch_size": {"dims": ["iter", "suggestion"], "attrs": {}, "data": [[250], [158], [218], [74], [168], [36], [159], [157], [35], [96], [232], [213], [218], [73], [95], [174], [187], [18], [177], [211]]}, "beta_1": {"dims": ["iter", "suggestion"], "attrs": {}, "data": [[0.6325789487384739], [0.9210832177736463], [0.839509867746752], [0.7339760608728008], [0.8169887977415086], [0.9789983343733188], [0.9281363523813173], [0.8820181375721706], [0.9236094123355615], [0.9849927742069976], [0.7938936163110716], [0.8136343037100249], [0.9857601749719163], [0.7996528267027836], [0.5671162971535383], [0.9041173987416978], [0.6877861678456875], [0.9744262825037034], [0.6219524845959503], [0.8147722059885278]]}, "beta_2": {"dims": ["iter", "suggestion"], "attrs": {}, "data": [[0.9683692767541383], [0.9704372326219464], [0.9008737016542802], [0.924487732354182], [0.9677584281778214], [0.9855864546482034], [0.9831236408958016], [0.9893423608908062], [0.9655862445173157], [0.9723047955887552], [0.9769517479652565], [0.9488342280749029], [0.9667925981645294], [0.9003853676967934], [0.9751330492891653], [0.9022211367108968], [0.9486933412373124], [0.9128089951494042], [0.9451323724703279], [0.9819014605616347]]}, "epsilon": {"dims": ["iter", "suggestion"], "attrs": {}, "data": [[8.509950615044607e-08], [5.791764691275606e-07], [4.593018958365625e-08], [4.3499100558570174e-07], [1.9205297481400225e-08], [8.448757352265516e-07], [6.243984153086523e-07], [3.9005886388713513e-07], [1.2897419125149076e-09], [8.092915164928425e-07], [9.258892865462698e-07], [8.908938138187356e-07], [9.453370759549571e-07], [7.790443036246103e-07], [6.868330000616437e-07], [5.692399474701896e-07], [6.448891227221148e-07], [6.314247346992307e-07], [9.778892726130785e-07], [6.97470379965544e-07]]}, "hidden_layer_sizes": {"dims": ["iter", "suggestion"], "attrs": {}, "data": [[82], [142], [114], [187], [71], [99], [198], [186], [72], [142], [122], [60], [154], [84], [60], [54], [92], [67], [68], [64]]}, "learning_rate_init": {"dims": ["iter", "suggestion"], "attrs": {}, "data": [[0.00038586916066989937], [0.022628672966642754], [1.3070068113678528e-05], [9.798258728203316e-05], [3.507883979452498e-05], [0.010534521959124916], [0.01634179672157601], [0.050059553312903265], [0.004312892765332735], [1.7620627831191645e-05], [0.024181403921443], [0.030416466886953767], [0.02985974794489556], [0.030466310236576578], [0.03547490252679437], [0.0225883337383643], [0.025586316931630996], [0.02375307286400923], [0.03417309958119154], [0.06398287101529077]]}, "tol": {"dims": ["iter", "suggestion"], "attrs": {}, "data": [[0.0016151587403163148], [0.002091090476412258], [0.06424468166610516], [0.0006197017664474543], [0.062358490467533466], [2.736758588720437e-05], [0.00015498169521995682], [0.00431842795326798], [0.0013109048344744976], [3.7693413628578254e-05], [0.0003482908931311136], [0.018068871891719664], [0.03423742589449189], [0.00526652668903528], [0.07491770756155855], [3.340664910975847e-05], [0.03092440674494307], [2.235748489710677e-05], [0.006884338638484406], [0.0288663379632232]]}, "validation_fraction": {"dims": ["iter", "suggestion"], "attrs": {}, "data": [[0.15668419391137045], [0.18374460934118253], [0.18554231059076343], [0.19920673003271727], [0.5368573065422387], [0.11146601715783237], [0.12417227774597171], [0.11039629710222093], [0.1555176936336073], [0.7309011177038021], [0.17721756775961162], [0.266585819050132], [0.19306794493770102], [0.4138728219682043], [0.4634345846025833], [0.5593746252668869], [0.8925636930489828], [0.14521381633980093], [0.21109346279819685], [0.10850319617868437]]}}}}
