# Supplementary material
Source: ML conference proceedings conference paper supplement (https://proceedings.neurips.cc/paper_files/paper/2022/hash/31a57804448363bcab777f818f75f5b4-Abstract.html)
Supplement: Supplementary file 1 [file 31a57804448363bcab777f818f75f5b4-Supplemental-Conference.zip › trading_off_resource_budgets_f-Supplementary Material/code_and_data/experiments/base_results/bo_20220228_124924_b7rkpeqg/suggest_log/063b6a5c15e55b2294d591e7584659dd.json]

{"meta": {"args": {"--uuid": "063b6a5c15e55b2294d591e7584659dd", "-db-root": "/home/damon_falck/blackboxbandits/experiments/saved_results", "--opt-root": "/home/damon_falck/blackboxbandits/experiments", "--data-root": "/home/damon_falck/blackboxbandits/experiments/penn_datasets", "--db": "bo_20220228_124924_b7rkpeqg", "--opt": "OpenTuner-BanditA", "--data": "clf-waveform-40", "--classifier": "lasso", "--metric": "nll", "--calls": 20, "--suggestions": 1, "--jobs-file": null, "--verbose": false, "dry_run": false, "rev": "bd14afd", "opt_rev": "0.8.7"}, "signature": [[{"C": 1.5676677195506077, "intercept_scaling": 7.257005721594282}, {"C": 2.57663857461359, "intercept_scaling": 1.5119336467641016}, {"C": 0.49501595537331966, "intercept_scaling": 3.833332156156665}, {"C": 0.5627932047415171, "intercept_scaling": 36.905577292137636}, {"C": 71.55682161754872, "intercept_scaling": 0.34179529120610125}], [0.3079807155286411, 0.307885379457688, 0.3097364731142143, 0.3091135815493057, 0.30737636114015265]]},
"data": {"coords": {"iter": {"dims": ["iter"], "attrs": {}, "data": [0, 1, 2, 3, 4, 5, 6, 7, 8, 9, 10, 11, 12, 13, 14, 15, 16, 17, 18, 19]}, "suggestion": {"dims": ["suggestion"], "attrs": {}, "data": [0]}}, "attrs": {}, "dims": {"iter": 20, "suggestion": 1}, "data_vars": {"C": {"dims": ["iter", "suggestion"], "attrs": {}, "data": [[77.24830596704636], [1.7962094435599407], [77.24830596704636], [50.28589710392636], [8.84170667183378], [43.13967157339666], [0.35855313396240795], [68.73127073956185], [2.1896595425089465], [2.5086064361916858], [26.143828110498323], [3.171829957471439], [73.31632470281114], [5.712273463272368], [8.514398915776548], [73.31632470281114], [73.31632470281114], [50.32948703517378], [39.0134708933569], [82.54395575814061]]}, "intercept_scaling": {"dims": ["iter", "suggestion"], "attrs": {}, "data": [[0.6616824083081372], [10.566841363506509], [0.7535862255845363], [1.3762778953292145], [35.223309601240096], [1.3762778953292145], [1.3762778953292145], [7.352784666287645], [6.278408507825931], [16.808079272486676], [18.044459804096853], [23.46048293052939], [7.352784666287645], [7.352784666287645], [7.352784666287645], [0.8294328785969016], [15.55846043365482], [2.1273164555261914], [7.352784666287645], [10.65503859640813]]}}}}
