# Supplementary material
Source: ML conference proceedings conference paper supplement (https://proceedings.neurips.cc/paper_files/paper/2022/hash/31a57804448363bcab777f818f75f5b4-Abstract.html)
Supplement: Supplementary file 1 [file 31a57804448363bcab777f818f75f5b4-Supplemental-Conference.zip › trading_off_resource_budgets_f-Supplementary Material/code_and_data/experiments/base_results/bo_20220228_124924_b7rkpeqg/suggest_log/065d36065bbd5ffa96eeb5db7a9029d6.json]

{"meta": {"args": {"--uuid": "065d36065bbd5ffa96eeb5db7a9029d6", "-db-root": "/home/damon_falck/blackboxbandits/experiments/saved_results", "--opt-root": "/home/damon_falck/blackboxbandits/experiments", "--data-root": "/home/damon_falck/blackboxbandits/experiments/penn_datasets", "--db": "bo_20220228_124924_b7rkpeqg", "--opt": "Scikit-GP-LCB", "--data": "reg-294-satellite-image", "--classifier": "lasso", "--metric": "mse", "--calls": 20, "--suggestions": 1, "--jobs-file": null, "--verbose": false, "dry_run": false, "rev": "bd14afd", "opt_rev": "0.9.0"}, "signature": [[{"alpha": 1.5676677195506077, "fit_intercept": true, "max_iter": 423, "normalize": true, "positive": false, "tol": 0.0038333321561566623}, {"alpha": 0.5627932047415171, "fit_intercept": true, "max_iter": 3989, "normalize": false, "positive": true, "tol": 0.001304907355036239}, {"alpha": 1.871450068624068, "fit_intercept": true, "max_iter": 16, "normalize": false, "positive": false, "tol": 0.021403233140986057}, {"alpha": 12.960656597279737, "fit_intercept": true, "max_iter": 4378, "normalize": true, "positive": false, "tol": 0.013246974647468445}, {"alpha": 0.029723346443356558, "fit_intercept": true, "max_iter": 24, "normalize": true, "positive": true, "tol": 0.00045566719139214756}], [1.1930518151278597, 1.1930518151278597, 1.1930518151278597, 1.1930518151278597, 1.1930518151278597]]},
"data": {"coords": {"iter": {"dims": ["iter"], "attrs": {}, "data": [0, 1, 2, 3, 4, 5, 6, 7, 8, 9, 10, 11, 12, 13, 14, 15, 16, 17, 18, 19]}, "suggestion": {"dims": ["suggestion"], "attrs": {}, "data": [0]}}, "attrs": {}, "dims": {"iter": 20, "suggestion": 1}, "data_vars": {"alpha": {"dims": ["iter", "suggestion"], "attrs": {}, "data": [[0.04132917454342639], [0.19029683654677923], [0.047191996821542494], [0.032245921614229636], [0.16173426405162514], [3.3601528902332856], [100.0], [100.0], [100.0], [0.01], [0.01], [0.01], [97.45160358106743], [0.01], [0.01], [0.01], [0.01], [0.01], [0.01], [0.01]]}, "fit_intercept": {"dims": ["iter", "suggestion"], "attrs": {}, "data": [[1], [0], [0], [0], [1], [0], [1], [0], [1], [1], [0], [1], [0], [1], [1], [1], [1], [1], [0], [1]]}, "max_iter": {"dims": ["iter", "suggestion"], "attrs": {}, "data": [[1674], [2481], [1115], [809], [4130], [673], [5000], [5000], [5000], [10], [5000], [5000], [1396], [3120], [5000], [5000], [4002], [5000], [5000], [5000]]}, "normalize": {"dims": ["iter", "suggestion"], "attrs": {}, "data": [[0], [1], [0], [0], [0], [1], [0], [0], [1], [0], [1], [1], [0], [0], [0], [0], [0], [0], [0], [0]]}, "positive": {"dims": ["iter", "suggestion"], "attrs": {}, "data": [[1], [0], [1], [1], [1], [1], [0], [0], [0], [0], [0], [0], [0], [0], [0], [0], [0], [0], [0], [0]]}, "tol": {"dims": ["iter", "suggestion"], "attrs": {}, "data": [[0.0020157610376871416], [0.000245174480953368], [7.079474950970513e-05], [0.00010088240720931348], [0.01378303620695122], [0.0003517544287789392], [0.1], [0.1], [0.1], [0.0010082667469417269], [1e-05], [1e-05], [1e-05], [1e-05], [1e-05], [1e-05], [1e-05], [1e-05], [1e-05], [1e-05]]}}}}
