# Supplementary material
Source: ML conference proceedings conference paper supplement (https://proceedings.neurips.cc/paper_files/paper/2022/hash/31a57804448363bcab777f818f75f5b4-Abstract.html)
Supplement: Supplementary file 1 [file 31a57804448363bcab777f818f75f5b4-Supplemental-Conference.zip › trading_off_resource_budgets_f-Supplementary Material/code_and_data/experiments/base_results/bo_20220228_124924_b7rkpeqg/suggest_log/067f2436e19b5937ad3bdcfab598e079.json]

{"meta": {"args": {"--uuid": "067f2436e19b5937ad3bdcfab598e079", "-db-root": "/home/damon_falck/blackboxbandits/experiments/saved_results", "--opt-root": "/home/damon_falck/blackboxbandits/experiments", "--data-root": "/home/damon_falck/blackboxbandits/experiments/penn_datasets", "--db": "bo_20220228_124924_b7rkpeqg", "--opt": "HyperOpt", "--data": "clf-magic", "--classifier": "MLP-adam", "--metric": "nll", "--calls": 20, "--suggestions": 1, "--jobs-file": null, "--verbose": false, "dry_run": false, "rev": "bd14afd", "opt_rev": "0.2.7"}, "signature": [[{"alpha": 0.019628224813442792, "batch_size": 182, "beta_1": 0.9410202200271762, "beta_2": 0.9998021557676793, "epsilon": 1.8662266976518e-08, "hidden_layer_sizes": 147, "learning_rate_init": 0.0005627932047415167, "tol": 0.03690557729213761, "validation_fraction": 0.8846827852548593}, {"alpha": 0.001998246739232944, "batch_size": 200, "beta_1": 0.919111482530466, "beta_2": 0.9998488260436156, "epsilon": 5.981221901152555e-07, "hidden_layer_sizes": 61, "learning_rate_init": 2.2310905607443014e-05, "tol": 1.2046852412030316e-05, "validation_fraction": 0.8117896445826539}, {"alpha": 0.46659545670218433, "batch_size": 219, "beta_1": 0.9889789783750891, "beta_2": 0.9999896868093284, "epsilon": 2.4234724484675948e-08, "hidden_layer_sizes": 167, "learning_rate_init": 2.972334644335654e-05, "tol": 0.0036281404040243792, "validation_fraction": 0.17260651658522078}, {"alpha": 4.656005689076002, "batch_size": 135, "beta_1": 0.870503881627747, "beta_2": 0.9948873266941017, "epsilon": 2.1023308743480125e-07, "hidden_layer_sizes": 118, "learning_rate_init": 0.001878173875716191, "tol": 1.1889379831773006e-05, "validation_fraction": 0.6264327093752792}, {"alpha": 0.04705159350400542, "batch_size": 158, "beta_1": 0.9870884262730957, "beta_2": 0.9999596874382349, "epsilon": 1.1981845126013875e-08, "hidden_layer_sizes": 116, "learning_rate_init": 0.006173405204074311, "tol": 1.7414134181586194e-05, "validation_fraction": 0.6754299026638921}], [0.4686950038096345, 0.5838932627376724, 0.49729031926095724, 0.4371441478513945, 0.32978618403183607]]},
"data": {"coords": {"iter": {"dims": ["iter"], "attrs": {}, "data": [0, 1, 2, 3, 4, 5, 6, 7, 8, 9, 10, 11, 12, 13, 14, 15, 16, 17, 18, 19]}, "suggestion": {"dims": ["suggestion"], "attrs": {}, "data": [0]}}, "attrs": {}, "dims": {"iter": 20, "suggestion": 1}, "data_vars": {"alpha": {"dims": ["iter", "suggestion"], "attrs": {}, "data": [[8.168734252058899], [6.506980247495172e-05], [0.0027170387702552274], [2.8524816677919556], [6.148281898723062], [5.416542075352457e-05], [2.6583532125625142e-05], [9.112021008848073], [0.007286838236935074], [0.00011647381538200155], [0.011473325125302443], [0.005807483156578911], [0.00028691747782568644], [0.0031908112069523086], [0.0018822469508124207], [0.0028986965221490407], [3.789703039558992e-05], [0.05907330396989164], [0.00032938676635123565], [0.11387746521469325]]}, "batch_size": {"dims": ["iter", "suggestion"], "attrs": {}, "data": [[46], [120], [72], [221], [68], [52], [196], [28], [133], [17], [198], [23], [51], [242], [75], [66], [204], [200], [172], [164]]}, "beta_1": {"dims": ["iter", "suggestion"], "attrs": {}, "data": [[0.7439058636068838], [0.6184235526154124], [0.5477013496518701], [0.8951696493304437], [0.5510436835963114], [0.6786025466517558], [0.9594708754495751], [0.6065948914676281], [0.7650168675242519], [0.6348594100271798], [0.5903679554345242], [0.6384295507789113], [0.7597645018272233], [0.8675021008129784], [0.9108678358627111], [0.7266016092290951], [0.5061427304627341], [0.7755296445477219], [0.646004804282129], [0.84286398660011]]}, "beta_2": {"dims": ["iter", "suggestion"], "attrs": {}, "data": [[0.9143991847741917], [0.9171303970226675], [0.9967953494820355], [0.947049320469959], [0.9747760782749998], [0.9918417157876951], [0.9265622017595633], [0.9759296095445437], [0.9250901905484921], [0.9700754642438468], [0.9649201678506303], [0.9930908746343072], [0.9194093979118676], [0.949829298605425], [0.9132452271590438], [0.9956113473104505], [0.9807187302085707], [0.9850103196157565], [0.9346202553339797], [0.9387195592931887]]}, "epsilon": {"dims": ["iter", "suggestion"], "attrs": {}, "data": [[7.455569568180326e-07], [3.0755689087074037e-07], [5.365929662402944e-09], [1.7768267859209378e-07], [3.249901659334057e-08], [1.593622912196813e-09], [1.5305320574075064e-08], [1.109730313433505e-07], [2.1485579822040548e-08], [8.077057628515229e-09], [2.2085427342051177e-08], [8.54722692897434e-08], [3.2295179805651047e-07], [4.4603989754792485e-07], [3.025622515927312e-07], [3.9055204627958305e-08], [1.3830574377404448e-08], [1.4903938605098932e-08], [1.1747272132673489e-09], [3.998417506200169e-09]]}, "hidden_layer_sizes": {"dims": ["iter", "suggestion"], "attrs": {}, "data": [[92], [111], [180], [136], [82], [135], [167], [129], [182], [198], [166], [102], [164], [154], [188], [178], [63], [90], [77], [81]]}, "learning_rate_init": {"dims": ["iter", "suggestion"], "attrs": {}, "data": [[0.0027841331423007504], [0.00010980642511926928], [0.026491715986534436], [5.132654241907559e-05], [0.0009077366232672202], [0.0022413579777241957], [0.021088128692826915], [1.2103638924935178e-05], [0.0004218150512294123], [0.0027525602451704324], [7.230953326385767e-05], [0.00016235294344697852], [0.0006703153429008863], [0.0007819608761428523], [2.179832501934497e-05], [0.0020708979487963396], [0.0003223921426168583], [0.0750831045019818], [0.02082317162149572], [1.1858450772611496e-05]]}, "tol": {"dims": ["iter", "suggestion"], "attrs": {}, "data": [[4.059810413545285e-05], [0.0002717802771679737], [0.051830913681337645], [0.0025147502094939192], [1.1433155337557232e-05], [0.0010895348505179823], [0.017160571401551195], [0.055299621055088614], [0.0001539014712096476], [1.0665057723719512e-05], [0.042516310148156065], [0.0003506706260213936], [0.0009445311052217811], [0.0008635036711390627], [0.048054057477474994], [0.00011544996848137757], [0.0357598021795615], [0.00041921360080043527], [0.0811732411645819], [0.002923161991335599]]}, "validation_fraction": {"dims": ["iter", "suggestion"], "attrs": {}, "data": [[0.89834943515579], [0.34074937482833545], [0.29428951439575946], [0.8236563609781905], [0.17898205197081818], [0.8843441691199266], [0.15113476592252403], [0.43420630694869067], [0.5327228327720718], [0.4528719743889685], [0.2139139759700749], [0.35586386123768393], [0.3144471076989155], [0.330695358825026], [0.244082171213871], [0.32833839490132355], [0.24317276238015928], [0.7148940224929462], [0.2026996091612717], [0.1146754344894928]]}}}}
