# Supplementary material
Source: ML conference proceedings conference paper supplement (https://proceedings.neurips.cc/paper_files/paper/2022/hash/31a57804448363bcab777f818f75f5b4-Abstract.html)
Supplement: Supplementary file 1 [file 31a57804448363bcab777f818f75f5b4-Supplemental-Conference.zip › trading_off_resource_budgets_f-Supplementary Material/code_and_data/experiments/base_results/bo_20220228_124924_b7rkpeqg/suggest_log/068da9f602af541dad913bf6aaa52f11.json]

{"meta": {"args": {"--uuid": "068da9f602af541dad913bf6aaa52f11", "-db-root": "/home/damon_falck/blackboxbandits/experiments/saved_results", "--opt-root": "/home/damon_falck/blackboxbandits/experiments", "--data-root": "/home/damon_falck/blackboxbandits/experiments/penn_datasets", "--db": "bo_20220228_124924_b7rkpeqg", "--opt": "Scikit-GP-LCB", "--data": "clf-texture", "--classifier": "lasso", "--metric": "nll", "--calls": 20, "--suggestions": 1, "--jobs-file": null, "--verbose": false, "dry_run": false, "rev": "bd14afd", "opt_rev": "0.9.0"}, "signature": [[{"C": 1.5676677195506077, "intercept_scaling": 7.257005721594282}, {"C": 2.57663857461359, "intercept_scaling": 1.5119336467641016}, {"C": 0.49501595537331966, "intercept_scaling": 3.833332156156665}, {"C": 0.5627932047415171, "intercept_scaling": 36.905577292137636}, {"C": 71.55682161754872, "intercept_scaling": 0.34179529120610125}], [0.044501065000671865, 0.035335529940508384, 0.08618494061689971, 0.0779045533709111, 0.019556687936390232]]},
"data": {"coords": {"iter": {"dims": ["iter"], "attrs": {}, "data": [0, 1, 2, 3, 4, 5, 6, 7, 8, 9, 10, 11, 12, 13, 14, 15, 16, 17, 18, 19]}, "suggestion": {"dims": ["suggestion"], "attrs": {}, "data": [0]}}, "attrs": {}, "dims": {"iter": 20, "suggestion": 1}, "data_vars": {"C": {"dims": ["iter", "suggestion"], "attrs": {}, "data": [[0.935320989822784], [0.04025432925365276], [0.0774368958321432], [0.6280645541940465], [5.932083293338978], [26.960507845941912], [73.22514846766649], [100.0], [0.01], [7.609822150520254], [18.357602504888707], [43.521992992690976], [0.26490157347936905], [100.0], [2.2849818413018035], [2.2015685844356927], [14.839852909363714], [3.008947310080631], [60.66862897848141], [54.94077116280036]]}, "intercept_scaling": {"dims": ["iter", "suggestion"], "attrs": {}, "data": [[42.374763091568035], [59.03290256608614], [0.050829159199762115], [10.662271235689952], [0.17909933222328872], [100.0], [0.01], [100.0], [27.395638018522977], [100.0], [0.01], [0.9325962177230129], [100.0], [0.49853866781725303], [100.0], [0.01], [3.8195621732682574], [3.381540610939807], [20.136537715398354], [100.0]]}}}}
