# Supplementary material
Source: ML conference proceedings conference paper supplement (https://proceedings.neurips.cc/paper_files/paper/2022/hash/31a57804448363bcab777f818f75f5b4-Abstract.html)
Supplement: Supplementary file 1 [file 31a57804448363bcab777f818f75f5b4-Supplemental-Conference.zip › trading_off_resource_budgets_f-Supplementary Material/code_and_data/experiments/base_results/bo_20220228_124924_b7rkpeqg/suggest_log/069f55e090b45c639c36471d21f9fb45.json]

{"meta": {"args": {"--uuid": "069f55e090b45c639c36471d21f9fb45", "-db-root": "/home/damon_falck/blackboxbandits/experiments/saved_results", "--opt-root": "/home/damon_falck/blackboxbandits/experiments", "--data-root": "/home/damon_falck/blackboxbandits/experiments/penn_datasets", "--db": "bo_20220228_124924_b7rkpeqg", "--opt": "Scikit-GP-LCB", "--data": "clf-balance-scale", "--classifier": "lasso", "--metric": "nll", "--calls": 20, "--suggestions": 1, "--jobs-file": null, "--verbose": false, "dry_run": false, "rev": "bd14afd", "opt_rev": "0.9.0"}, "signature": [[{"C": 1.5676677195506077, "intercept_scaling": 7.257005721594282}, {"C": 2.57663857461359, "intercept_scaling": 1.5119336467641016}, {"C": 0.49501595537331966, "intercept_scaling": 3.833332156156665}, {"C": 0.5627932047415171, "intercept_scaling": 36.905577292137636}, {"C": 71.55682161754872, "intercept_scaling": 0.34179529120610125}], [0.33458547908362135, 0.3134709803600376, 0.3995968654560026, 0.3892303076061382, 0.16988357267262977]]},
"data": {"coords": {"iter": {"dims": ["iter"], "attrs": {}, "data": [0, 1, 2, 3, 4, 5, 6, 7, 8, 9, 10, 11, 12, 13, 14, 15, 16, 17, 18, 19]}, "suggestion": {"dims": ["suggestion"], "attrs": {}, "data": [0]}}, "attrs": {}, "dims": {"iter": 20, "suggestion": 1}, "data_vars": {"C": {"dims": ["iter", "suggestion"], "attrs": {}, "data": [[0.019372834623826725], [5.01926511657528], [10.372794343490414], [3.0467156769877777], [15.51436734040951], [100.0], [100.0], [57.47052118246955], [100.0], [100.0], [100.0], [100.0], [100.0], [100.0], [100.0], [100.0], [100.0], [100.0], [100.0], [100.0]]}, "intercept_scaling": {"dims": ["iter", "suggestion"], "attrs": {}, "data": [[2.37273022779249], [0.1949493414006237], [0.015999632243578085], [0.054624906502492465], [2.609877877156038], [100.0], [100.0], [100.0], [0.01], [100.0], [100.0], [100.0], [100.0], [100.0], [100.0], [100.0], [100.0], [100.0], [100.0], [100.0]]}}}}
