# Supplementary material
Source: ML conference proceedings conference paper supplement (https://proceedings.neurips.cc/paper_files/paper/2022/hash/31a57804448363bcab777f818f75f5b4-Abstract.html)
Supplement: Supplementary file 1 [file 31a57804448363bcab777f818f75f5b4-Supplemental-Conference.zip › trading_off_resource_budgets_f-Supplementary Material/code_and_data/experiments/base_results/bo_20220228_124924_b7rkpeqg/suggest_log/072ea477071255918e711a37615910a4.json]

{"meta": {"args": {"--uuid": "072ea477071255918e711a37615910a4", "-db-root": "/home/damon_falck/blackboxbandits/experiments/saved_results", "--opt-root": "/home/damon_falck/blackboxbandits/experiments", "--data-root": "/home/damon_falck/blackboxbandits/experiments/penn_datasets", "--db": "bo_20220228_124924_b7rkpeqg", "--opt": "Scikit-GBRT-Hedge", "--data": "reg-645-fri-c3-500-50", "--classifier": "MLP-adam", "--metric": "mse", "--calls": 20, "--suggestions": 1, "--jobs-file": null, "--verbose": false, "dry_run": false, "rev": "bd14afd", "opt_rev": "0.9.0"}, "signature": [[{"alpha": 0.019628224813442792, "batch_size": 182, "beta_1": 0.9410202200271762, "beta_2": 0.9998021557676793, "epsilon": 1.8662266976518e-08, "hidden_layer_sizes": 147, "learning_rate_init": 0.0005627932047415167, "tol": 0.03690557729213761, "validation_fraction": 0.8846827852548593}, {"alpha": 0.001998246739232944, "batch_size": 200, "beta_1": 0.919111482530466, "beta_2": 0.9998488260436156, "epsilon": 5.981221901152555e-07, "hidden_layer_sizes": 61, "learning_rate_init": 2.2310905607443014e-05, "tol": 1.2046852412030316e-05, "validation_fraction": 0.8117896445826539}, {"alpha": 0.46659545670218433, "batch_size": 219, "beta_1": 0.9889789783750891, "beta_2": 0.9999896868093284, "epsilon": 2.4234724484675948e-08, "hidden_layer_sizes": 167, "learning_rate_init": 2.972334644335654e-05, "tol": 0.0036281404040243792, "validation_fraction": 0.17260651658522078}, {"alpha": 4.656005689076002, "batch_size": 135, "beta_1": 0.870503881627747, "beta_2": 0.9948873266941017, "epsilon": 2.1023308743480125e-07, "hidden_layer_sizes": 118, "learning_rate_init": 0.001878173875716191, "tol": 1.1889379831773006e-05, "validation_fraction": 0.6264327093752792}, {"alpha": 0.04705159350400542, "batch_size": 158, "beta_1": 0.9870884262730957, "beta_2": 0.9999596874382349, "epsilon": 1.1981845126013875e-08, "hidden_layer_sizes": 116, "learning_rate_init": 0.006173405204074311, "tol": 1.7414134181586194e-05, "validation_fraction": 0.6754299026638921}], [1.330825350216392, 1.7623859323572684, 1.2590642609912834, 1.00951214934483, 1.2113770564706285]]},
"data": {"coords": {"iter": {"dims": ["iter"], "attrs": {}, "data": [0, 1, 2, 3, 4, 5, 6, 7, 8, 9, 10, 11, 12, 13, 14, 15, 16, 17, 18, 19]}, "suggestion": {"dims": ["suggestion"], "attrs": {}, "data": [0]}}, "attrs": {}, "dims": {"iter": 20, "suggestion": 1}, "data_vars": {"alpha": {"dims": ["iter", "suggestion"], "attrs": {}, "data": [[3.3795614130772726], [5.809707277754603e-05], [6.3923902364500735], [0.051130450174083526], [0.002749265841743943], [2.9078493546930986], [6.111875047290119], [3.4748643533133268], [9.725726581745302], [9.133632908367293], [9.00399846284607], [7.798083012930683], [9.934610967938124], [9.346135691741319], [5.677749899131335], [4.486703462986279], [8.350846557201548], [3.9306460813303454], [0.05833725934364019], [0.00012566456493613912]]}, "batch_size": {"dims": ["iter", "suggestion"], "attrs": {}, "data": [[68], [246], [29], [14], [248], [249], [180], [31], [60], [24], [67], [57], [67], [71], [39], [39], [25], [129], [26], [229]]}, "beta_1": {"dims": ["iter", "suggestion"], "attrs": {}, "data": [[0.8259444508301208], [0.8470385869899282], [0.6133843220950235], [0.6303024503344206], [0.5759007581950408], [0.5493912338206155], [0.8703365593344611], [0.8708591693181997], [0.6880285699672851], [0.7039473161793915], [0.6545507089732872], [0.6258141561821163], [0.6602000907117505], [0.726889333650985], [0.9300830979147481], [0.8575062501196417], [0.6136181756919001], [0.9271012401585461], [0.8182283168028649], [0.9584290694474654]]}, "beta_2": {"dims": ["iter", "suggestion"], "attrs": {}, "data": [[0.9465282545603905], [0.9513396948429406], [0.9257112669991371], [0.9908869373054344], [0.9993131664885562], [0.9172200706961411], [0.9393356971808725], [0.9476384780196939], [0.9091536308274645], [0.9058159556472392], [0.9295375140418093], [0.9306271020479484], [0.9149314381944442], [0.9035741641016234], [0.9224362910924341], [0.9028299352219773], [0.9130748066996482], [0.9027334749476266], [0.9855984853570936], [0.9878174672815794]]}, "epsilon": {"dims": ["iter", "suggestion"], "attrs": {}, "data": [[1.256629801336739e-07], [4.621472578093758e-08], [4.7435208527075016e-09], [1.516911674814999e-07], [2.0856573430816507e-07], [6.247275476219047e-07], [3.2179266982914267e-09], [6.82823964186343e-08], [1.8549333104861206e-09], [2.7564036929110525e-08], [8.987896760369017e-08], [9.956613112384381e-09], [1.5951377106544815e-09], [1.2458402892188319e-08], [2.5244131559947786e-08], [1.7729496681665053e-08], [1.0305212334903086e-08], [2.5019255116673545e-09], [1.071308736021362e-09], [6.188760703920288e-08]]}, "hidden_layer_sizes": {"dims": ["iter", "suggestion"], "attrs": {}, "data": [[98], [65], [66], [51], [119], [169], [189], [84], [74], [92], [187], [111], [81], [81], [89], [196], [103], [107], [185], [92]]}, "learning_rate_init": {"dims": ["iter", "suggestion"], "attrs": {}, "data": [[0.0020393396239889003], [0.06800098360755162], [0.013280354549061934], [2.193291777376092e-05], [8.95840038813024e-05], [0.015569971820327306], [6.48051463348819e-05], [0.0015590676264077416], [0.04509105049649582], [0.0021253844583214174], [0.017437128904449442], [0.02196257545919858], [0.0031316670742783793], [0.0021839614147284724], [0.002663201931106631], [0.08891784449672084], [0.0016284670430678472], [0.0007017513103123738], [3.6396862553378815e-05], [0.002598950234957243]]}, "tol": {"dims": ["iter", "suggestion"], "attrs": {}, "data": [[1.6293854951022123e-05], [0.002053536197466758], [0.000263001634393622], [0.00016403873465265707], [0.0007243447638968086], [2.430975271315158e-05], [0.06037777401209085], [8.721818922695248e-05], [0.0006364173534390823], [0.00018241504373427784], [0.0005153970590177825], [0.0004836594027326071], [3.8414992532858055e-05], [0.0005670735684092766], [3.232401853514816e-05], [0.0026292611089786624], [0.02239921174203264], [0.04197141597120713], [0.0751213429474797], [0.05446037233551122]]}, "validation_fraction": {"dims": ["iter", "suggestion"], "attrs": {}, "data": [[0.12555585089719626], [0.5381734688052138], [0.4136456312104475], [0.12565570677475393], [0.7847837488788099], [0.3173372243257928], [0.8278269039524], [0.16218933310462522], [0.12088837846372212], [0.40929253742692345], [0.8843087681566638], [0.2527401766597044], [0.1288536520936361], [0.1358699771353698], [0.15315464823454125], [0.2598962607090315], [0.13341338285331866], [0.17287242115464296], [0.7290359621776619], [0.6398216318000618]]}}}}
