# Supplementary material
Source: ML conference proceedings conference paper supplement (https://proceedings.neurips.cc/paper_files/paper/2022/hash/31a57804448363bcab777f818f75f5b4-Abstract.html)
Supplement: Supplementary file 1 [file 31a57804448363bcab777f818f75f5b4-Supplemental-Conference.zip › trading_off_resource_budgets_f-Supplementary Material/code_and_data/experiments/base_results/bo_20220228_124924_b7rkpeqg/suggest_log/078c6f8205e55415ba298f4edfde2c8f.json]

{"meta": {"args": {"--uuid": "078c6f8205e55415ba298f4edfde2c8f", "-db-root": "/home/damon_falck/blackboxbandits/experiments/saved_results", "--opt-root": "/home/damon_falck/blackboxbandits/experiments", "--data-root": "/home/damon_falck/blackboxbandits/experiments/penn_datasets", "--db": "bo_20220228_124924_b7rkpeqg", "--opt": "HyperOpt", "--data": "clf-new-thyroid", "--classifier": "lasso", "--metric": "nll", "--calls": 20, "--suggestions": 1, "--jobs-file": null, "--verbose": false, "dry_run": false, "rev": "bd14afd", "opt_rev": "0.2.7"}, "signature": [[{"C": 1.5676677195506077, "intercept_scaling": 7.257005721594282}, {"C": 2.57663857461359, "intercept_scaling": 1.5119336467641016}, {"C": 0.49501595537331966, "intercept_scaling": 3.833332156156665}, {"C": 0.5627932047415171, "intercept_scaling": 36.905577292137636}, {"C": 71.55682161754872, "intercept_scaling": 0.34179529120610125}], [0.15475392921649408, 0.14821575254205352, 0.2260990111855326, 0.20831325950313526, 0.21299236869327273]]},
"data": {"coords": {"iter": {"dims": ["iter"], "attrs": {}, "data": [0, 1, 2, 3, 4, 5, 6, 7, 8, 9, 10, 11, 12, 13, 14, 15, 16, 17, 18, 19]}, "suggestion": {"dims": ["suggestion"], "attrs": {}, "data": [0]}}, "attrs": {}, "dims": {"iter": 20, "suggestion": 1}, "data_vars": {"C": {"dims": ["iter", "suggestion"], "attrs": {}, "data": [[0.09713671189450483], [62.655039854540554], [0.13694274044619018], [10.791380362654412], [0.04604235634656617], [0.3568686173072979], [45.05340181116228], [56.09175907155334], [24.559504849939106], [0.3048128004849336], [0.6245982803837352], [0.024956536037241857], [1.560522584476789], [5.364996703473985], [3.192076725132234], [0.0721466556213943], [3.172217555702919], [0.6688858281981519], [95.96615873292232], [93.70824341461271]]}, "intercept_scaling": {"dims": ["iter", "suggestion"], "attrs": {}, "data": [[74.51564936171066], [2.691271434494176], [0.20880088292448504], [0.10918054800243637], [1.5833253846750424], [0.6103578234909302], [0.06114577073152754], [38.268701995657935], [32.48793441804493], [8.992193362188733], [1.1681744410221482], [0.04266872316090779], [29.342752938610676], [5.822715930631112], [0.08660584805537075], [12.201142758064382], [0.07692141282199558], [0.3009646988152074], [0.042121458829144094], [0.4615211309413986]]}}}}
