# Supplementary material
Source: ML conference proceedings conference paper supplement (https://proceedings.neurips.cc/paper_files/paper/2022/hash/31a57804448363bcab777f818f75f5b4-Abstract.html)
Supplement: Supplementary file 1 [file 31a57804448363bcab777f818f75f5b4-Supplemental-Conference.zip › trading_off_resource_budgets_f-Supplementary Material/code_and_data/experiments/base_results/bo_20220228_124924_b7rkpeqg/suggest_log/084ff4dff6da587bb09e9e00073c186d.json]

{"meta": {"args": {"--uuid": "084ff4dff6da587bb09e9e00073c186d", "-db-root": "/home/damon_falck/blackboxbandits/experiments/saved_results", "--opt-root": "/home/damon_falck/blackboxbandits/experiments", "--data-root": "/home/damon_falck/blackboxbandits/experiments/penn_datasets", "--db": "bo_20220228_124924_b7rkpeqg", "--opt": "OpenTuner-BanditA", "--data": "clf-shuttle", "--classifier": "MLP-adam", "--metric": "nll", "--calls": 20, "--suggestions": 1, "--jobs-file": null, "--verbose": false, "dry_run": false, "rev": "bd14afd", "opt_rev": "0.8.7"}, "signature": [[{"alpha": 0.019628224813442792, "batch_size": 182, "beta_1": 0.9410202200271762, "beta_2": 0.9998021557676793, "epsilon": 1.8662266976518e-08, "hidden_layer_sizes": 147, "learning_rate_init": 0.0005627932047415167, "tol": 0.03690557729213761, "validation_fraction": 0.8846827852548593}, {"alpha": 0.001998246739232944, "batch_size": 200, "beta_1": 0.919111482530466, "beta_2": 0.9998488260436156, "epsilon": 5.981221901152555e-07, "hidden_layer_sizes": 61, "learning_rate_init": 2.2310905607443014e-05, "tol": 1.2046852412030316e-05, "validation_fraction": 0.8117896445826539}, {"alpha": 0.46659545670218433, "batch_size": 219, "beta_1": 0.9889789783750891, "beta_2": 0.9999896868093284, "epsilon": 2.4234724484675948e-08, "hidden_layer_sizes": 167, "learning_rate_init": 2.972334644335654e-05, "tol": 0.0036281404040243792, "validation_fraction": 0.17260651658522078}, {"alpha": 4.656005689076002, "batch_size": 135, "beta_1": 0.870503881627747, "beta_2": 0.9948873266941017, "epsilon": 2.1023308743480125e-07, "hidden_layer_sizes": 118, "learning_rate_init": 0.001878173875716191, "tol": 1.1889379831773006e-05, "validation_fraction": 0.6264327093752792}, {"alpha": 0.04705159350400542, "batch_size": 158, "beta_1": 0.9870884262730957, "beta_2": 0.9999596874382349, "epsilon": 1.1981845126013875e-08, "hidden_layer_sizes": 116, "learning_rate_init": 0.006173405204074311, "tol": 1.7414134181586194e-05, "validation_fraction": 0.6754299026638921}], [0.23138554212927925, 0.5703368883096062, 0.32739579379265804, 0.13286669827552258, 0.023934626235750666]]},
"data": {"coords": {"iter": {"dims": ["iter"], "attrs": {}, "data": [0, 1, 2, 3, 4, 5, 6, 7, 8, 9, 10, 11, 12, 13, 14, 15, 16, 17, 18, 19]}, "suggestion": {"dims": ["suggestion"], "attrs": {}, "data": [0]}}, "attrs": {}, "dims": {"iter": 20, "suggestion": 1}, "data_vars": {"alpha": {"dims": ["iter", "suggestion"], "attrs": {}, "data": [[0.4892930585975885], [0.4892930585975885], [6.338805905588833], [5.869992227739166], [0.4892930585975885], [0.4892930585975885], [0.4892930585975885], [0.4892930585975885], [0.4892930585975885], [0.4892930585975885], [0.4892930585975885], [0.4892930585975885], [0.8775742683567666], [0.4892930585975885], [1.236337331328682], [0.09899918059762174], [4.564055361408147], [0.4892930585975885], [0.4892930585975885], [0.4892930585975885]]}, "batch_size": {"dims": ["iter", "suggestion"], "attrs": {}, "data": [[161], [161], [68], [49], [161], [183], [200], [201], [183], [183], [203], [183], [183], [183], [183], [38], [63], [183], [183], [163]]}, "beta_1": {"dims": ["iter", "suggestion"], "attrs": {}, "data": [[0.5387754018761848], [0.5387754018761848], [0.5338813506346977], [0.5311771440061144], [0.5387754018761848], [0.5387754018761848], [0.5387131263561873], [0.5387754018761848], [0.5387754018761848], [0.5387754018761848], [0.5387754018761848], [0.5387754018761848], [0.526596197004901], [0.5387754018761848], [0.5387754018761848], [0.7107273608911557], [0.7167921131946566], [0.5855029708389343], [0.5387754018761848], [0.5387754018761848]]}, "beta_2": {"dims": ["iter", "suggestion"], "attrs": {}, "data": [[0.9517395005302882], [0.9517395005302882], [0.9825937637911062], [0.9795081793344004], [0.9517395005302882], [0.9511632496304494], [0.9511632496304494], [0.9409138840081989], [0.9511632496304494], [0.9511632496304494], [0.9440634346709575], [0.9511632496304494], [0.9571831852666483], [0.9511632496304494], [0.9546527501162342], [0.9879723012941959], [0.9911155479358981], [0.9511632496304494], [0.9575394275857929], [0.9636726921022283]]}, "epsilon": {"dims": ["iter", "suggestion"], "attrs": {}, "data": [[9.533562087046709e-08], [5.038416718566575e-07], [7.983924849302705e-07], [5.519141665083206e-07], [5.038416718566575e-07], [4.539849662038288e-07], [3.953929884897557e-07], [4.539849662038288e-07], [4.539849662038288e-07], [3.430746899074345e-07], [4.539849662038288e-07], [4.539849662038288e-07], [4.539849662038288e-07], [4.539849662038288e-07], [4.539849662038288e-07], [9.424952764075224e-07], [9.579466277170591e-07], [4.539849662038288e-07], [4.539849662038288e-07], [4.539849662038288e-07]]}, "hidden_layer_sizes": {"dims": ["iter", "suggestion"], "attrs": {}, "data": [[87], [87], [140], [133], [87], [87], [72], [81], [87], [83], [87], [87], [88], [121], [87], [178], [170], [98], [87], [87]]}, "learning_rate_init": {"dims": ["iter", "suggestion"], "attrs": {}, "data": [[0.09550872206375442], [0.06046649487536942], [0.08732699957280558], [0.0028222971541433284], [0.06046649487536942], [0.06046649487536942], [0.06516596110795085], [0.061628270452359794], [0.06046649487536942], [0.06046649487536942], [0.058972475416883156], [0.09288125758373293], [0.04979911023669808], [0.06046649487536942], [0.06046649487536942], [0.032864905398047144], [0.04772825047830625], [0.0556855908820501], [0.06046649487536942], [0.06085798990216389]]}, "tol": {"dims": ["iter", "suggestion"], "attrs": {}, "data": [[0.05606816929598029], [0.05606816929598029], [0.0958882001245626], [0.00120578680209953], [0.05606816929598029], [0.05606816929598029], [0.0578895881219123], [0.05606816929598029], [0.05606816929598029], [0.05606816929598029], [0.033509248524604844], [0.05606816929598029], [0.05606816929598029], [0.05606816929598029], [0.034697389263814875], [0.08641768654909947], [0.08751902788449255], [0.05606816929598029], [0.05606816929598029], [0.047230135816633094]]}, "validation_fraction": {"dims": ["iter", "suggestion"], "attrs": {}, "data": [[0.5889755585572071], [0.5889755585572071], [0.4229659007664369], [0.6197052568191282], [0.8584838066961937], [0.6056116186383231], [0.6056116186383231], [0.6721636840032136], [0.3633213994053066], [0.6485004667623693], [0.7009487128279984], [0.6056116186383231], [0.721569944629858], [0.6056116186383231], [0.5845731647125971], [0.5066261735237477], [0.48500015058512236], [0.6056116186383231], [0.6056116186383231], [0.5750775697685891]]}}}}
