# Supplementary material
Source: ML conference proceedings conference paper supplement (https://proceedings.neurips.cc/paper_files/paper/2022/hash/31a57804448363bcab777f818f75f5b4-Abstract.html)
Supplement: Supplementary file 1 [file 31a57804448363bcab777f818f75f5b4-Supplemental-Conference.zip › trading_off_resource_budgets_f-Supplementary Material/code_and_data/experiments/base_results/bo_20220228_124924_b7rkpeqg/suggest_log/085cae829f0b531f9b82ea9f34925cb4.json]

{"meta": {"args": {"--uuid": "085cae829f0b531f9b82ea9f34925cb4", "-db-root": "/home/damon_falck/blackboxbandits/experiments/saved_results", "--opt-root": "/home/damon_falck/blackboxbandits/experiments", "--data-root": "/home/damon_falck/blackboxbandits/experiments/penn_datasets", "--db": "bo_20220228_124924_b7rkpeqg", "--opt": "OpenTuner-GA", "--data": "clf-buggyCrx", "--classifier": "MLP-adam", "--metric": "nll", "--calls": 20, "--suggestions": 1, "--jobs-file": null, "--verbose": false, "dry_run": false, "rev": "bd14afd", "opt_rev": "0.8.7"}, "signature": [[{"alpha": 0.019628224813442792, "batch_size": 182, "beta_1": 0.9410202200271762, "beta_2": 0.9998021557676793, "epsilon": 1.8662266976518e-08, "hidden_layer_sizes": 147, "learning_rate_init": 0.0005627932047415167, "tol": 0.03690557729213761, "validation_fraction": 0.8846827852548593}, {"alpha": 0.001998246739232944, "batch_size": 200, "beta_1": 0.919111482530466, "beta_2": 0.9998488260436156, "epsilon": 5.981221901152555e-07, "hidden_layer_sizes": 61, "learning_rate_init": 2.2310905607443014e-05, "tol": 1.2046852412030316e-05, "validation_fraction": 0.8117896445826539}, {"alpha": 0.46659545670218433, "batch_size": 219, "beta_1": 0.9889789783750891, "beta_2": 0.9999896868093284, "epsilon": 2.4234724484675948e-08, "hidden_layer_sizes": 167, "learning_rate_init": 2.972334644335654e-05, "tol": 0.0036281404040243792, "validation_fraction": 0.17260651658522078}, {"alpha": 4.656005689076002, "batch_size": 135, "beta_1": 0.870503881627747, "beta_2": 0.9948873266941017, "epsilon": 2.1023308743480125e-07, "hidden_layer_sizes": 118, "learning_rate_init": 0.001878173875716191, "tol": 1.1889379831773006e-05, "validation_fraction": 0.6264327093752792}, {"alpha": 0.04705159350400542, "batch_size": 158, "beta_1": 0.9870884262730957, "beta_2": 0.9999596874382349, "epsilon": 1.1981845126013875e-08, "hidden_layer_sizes": 116, "learning_rate_init": 0.006173405204074311, "tol": 1.7414134181586194e-05, "validation_fraction": 0.6754299026638921}], [0.5812004953646907, 0.7243510000981987, 0.6939366561626806, 0.396172504716234, 0.435814531723744]]},
"data": {"coords": {"iter": {"dims": ["iter"], "attrs": {}, "data": [0, 1, 2, 3, 4, 5, 6, 7, 8, 9, 10, 11, 12, 13, 14, 15, 16, 17, 18, 19]}, "suggestion": {"dims": ["suggestion"], "attrs": {}, "data": [0]}}, "attrs": {}, "dims": {"iter": 20, "suggestion": 1}, "data_vars": {"alpha": {"dims": ["iter", "suggestion"], "attrs": {}, "data": [[1.3035294090036662], [3.9303805073234765], [3.9303805073234765], [7.758152975672356], [3.9303805073234765], [3.9303805073234765], [0.8611363230670969], [3.9303805073234765], [3.473857120875959], [3.9303805073234765], [3.9303805073234765], [0.4719410381812483], [0.17445420586484722], [7.616642404839988], [3.9303805073234765], [5.550571152828261], [6.568116306928339], [1.3912565983690706], [1.7219402322072126], [3.9303805073234765]]}, "batch_size": {"dims": ["iter", "suggestion"], "attrs": {}, "data": [[204], [111], [111], [91], [111], [111], [164], [111], [119], [111], [111], [130], [112], [111], [111], [240], [181], [136], [143], [165]]}, "beta_1": {"dims": ["iter", "suggestion"], "attrs": {}, "data": [[0.650774773343495], [0.7688406381477458], [0.7688406381477458], [0.9525399941840494], [0.7688406381477458], [0.7688406381477458], [0.5502388216103891], [0.7688406381477458], [0.9545742089076179], [0.8784038664865713], [0.7688406381477458], [0.6037108202061846], [0.8782211384705678], [0.7688406381477458], [0.7688406381477458], [0.5248710187394232], [0.7053602330061025], [0.613601714566268], [0.5529616745862895], [0.7688406381477458]]}, "beta_2": {"dims": ["iter", "suggestion"], "attrs": {}, "data": [[0.9007421694236236], [0.9471745967060521], [0.9471745967060521], [0.9604280690697522], [0.9471745967060521], [0.9471745967060521], [0.91299317996825], [0.9110542705584186], [0.930796623771866], [0.9471745967060521], [0.9471745967060521], [0.996112388434548], [0.9080420695559596], [0.9471745967060521], [0.9471745967060521], [0.9175904775472669], [0.9709150991759616], [0.9870985132392928], [0.9040425334128516], [0.9471745967060521]]}, "epsilon": {"dims": ["iter", "suggestion"], "attrs": {}, "data": [[1.6807506178548214e-07], [6.061436163279078e-07], [6.061436163279078e-07], [2.0357997013217732e-07], [6.061436163279078e-07], [6.061436163279078e-07], [2.7698933938222105e-07], [6.061436163279078e-07], [9.549593379681578e-07], [6.061436163279078e-07], [6.061436163279078e-07], [7.315182432304491e-07], [1.3145883995310703e-07], [6.061436163279078e-07], [6.061436163279078e-07], [8.580225333848213e-07], [8.809285833305248e-07], [4.681076698770094e-07], [8.003294450781007e-07], [6.061436163279078e-07]]}, "hidden_layer_sizes": {"dims": ["iter", "suggestion"], "attrs": {}, "data": [[75], [51], [130], [109], [130], [130], [164], [130], [110], [130], [130], [122], [91], [130], [130], [80], [162], [92], [177], [130]]}, "learning_rate_init": {"dims": ["iter", "suggestion"], "attrs": {}, "data": [[0.014616392592378947], [0.016266814431629962], [0.016266814431629962], [0.023052696517567407], [0.016266814431629962], [0.016266814431629962], [0.06050967990299488], [0.016266814431629962], [0.009297208125152712], [0.016266814431629962], [0.016266814431629962], [0.0432401972075011], [0.03715913092089778], [0.016266814431629962], [0.016266814431629962], [0.04001344019398639], [0.0826618837748107], [0.010269799937197833], [0.0865881547938298], [0.016266814431629962]]}, "tol": {"dims": ["iter", "suggestion"], "attrs": {}, "data": [[0.005883082311646404], [0.09747291725031897], [0.09747291725031897], [0.02005844187171706], [0.08794503557934778], [0.09747291725031897], [0.06598902880473838], [0.09747291725031897], [0.0710965137613772], [0.09747291725031897], [0.09747291725031897], [0.02292121263317164], [0.051618783640447745], [0.09747291725031897], [0.09747291725031897], [0.056445888461132014], [0.030873394226655627], [0.05207316265612943], [0.06289565640214427], [0.09747291725031897]]}, "validation_fraction": {"dims": ["iter", "suggestion"], "attrs": {}, "data": [[0.6981331272130544], [0.5491023268621293], [0.5491023268621293], [0.8545733969494551], [0.5491023268621293], [0.12057004257758282], [0.3358917196039116], [0.5491023268621293], [0.8260318719860649], [0.5491023268621293], [0.21944716986608662], [0.8996775133466607], [0.26341135820767414], [0.5491023268621293], [0.3364834859593855], [0.8533991617716636], [0.8911361510974033], [0.8828047882968764], [0.48351347056635274], [0.5491023268621293]]}}}}
