# Supplementary material
Source: ML conference proceedings conference paper supplement (https://proceedings.neurips.cc/paper_files/paper/2022/hash/31a57804448363bcab777f818f75f5b4-Abstract.html)
Supplement: Supplementary file 1 [file 31a57804448363bcab777f818f75f5b4-Supplemental-Conference.zip › trading_off_resource_budgets_f-Supplementary Material/code_and_data/experiments/base_results/bo_20220228_124924_b7rkpeqg/suggest_log/090cf5ec5ca0511d95ddeff1a8efe958.json]

{"meta": {"args": {"--uuid": "090cf5ec5ca0511d95ddeff1a8efe958", "-db-root": "/home/damon_falck/blackboxbandits/experiments/saved_results", "--opt-root": "/home/damon_falck/blackboxbandits/experiments", "--data-root": "/home/damon_falck/blackboxbandits/experiments/penn_datasets", "--db": "bo_20220228_124924_b7rkpeqg", "--opt": "Scikit-GBRT-Hedge", "--data": "clf-allrep", "--classifier": "lasso", "--metric": "nll", "--calls": 20, "--suggestions": 1, "--jobs-file": null, "--verbose": false, "dry_run": false, "rev": "bd14afd", "opt_rev": "0.9.0"}, "signature": [[{"C": 1.5676677195506077, "intercept_scaling": 7.257005721594282}, {"C": 2.57663857461359, "intercept_scaling": 1.5119336467641016}, {"C": 0.49501595537331966, "intercept_scaling": 3.833332156156665}, {"C": 0.5627932047415171, "intercept_scaling": 36.905577292137636}, {"C": 71.55682161754872, "intercept_scaling": 0.34179529120610125}], [0.12533642168002496, 0.1273935391678564, 0.11682120417132295, 0.11787462028894306, 0.1880393871227425]]},
"data": {"coords": {"iter": {"dims": ["iter"], "attrs": {}, "data": [0, 1, 2, 3, 4, 5, 6, 7, 8, 9, 10, 11, 12, 13, 14, 15, 16, 17, 18, 19]}, "suggestion": {"dims": ["suggestion"], "attrs": {}, "data": [0]}}, "attrs": {}, "dims": {"iter": 20, "suggestion": 1}, "data_vars": {"C": {"dims": ["iter", "suggestion"], "attrs": {}, "data": [[0.026656808125673028], [4.224788567784653], [77.65704149350356], [16.22030749492281], [0.1513786357822581], [2.6455197804763255], [0.0332366888351009], [0.013442977122988153], [0.021982460795554597], [0.10968844954553508], [50.696833006888625], [0.06929811127290063], [0.11800832457970975], [0.11934466135283839], [0.1059866303267467], [0.10781840952595284], [0.13305915441245272], [80.4847486271319], [0.0495416248541096], [0.026545466245803253]]}, "intercept_scaling": {"dims": ["iter", "suggestion"], "attrs": {}, "data": [[0.28183667775118265], [3.0657491082971267], [1.0982378311998096], [0.043782503286016725], [0.08973376797128121], [18.36134835298713], [39.15880024383578], [73.96064812678159], [2.790004438481258], [35.554302808129975], [31.24797307008499], [36.01603148373393], [34.444010478679104], [34.68995288553214], [33.53769005267111], [34.319775539600606], [34.259273827814475], [34.52327673898324], [0.5329567827362214], [0.34890482583033267]]}}}}
