# Supplementary material
Source: ML conference proceedings conference paper supplement (https://proceedings.neurips.cc/paper_files/paper/2022/hash/31a57804448363bcab777f818f75f5b4-Abstract.html)
Supplement: Supplementary file 1 [file 31a57804448363bcab777f818f75f5b4-Supplemental-Conference.zip › trading_off_resource_budgets_f-Supplementary Material/code_and_data/experiments/base_results/bo_20220228_124924_b7rkpeqg/suggest_log/090e0b687144595b9a979bfb26e7eb5c.json]

{"meta": {"args": {"--uuid": "090e0b687144595b9a979bfb26e7eb5c", "-db-root": "/home/damon_falck/blackboxbandits/experiments/saved_results", "--opt-root": "/home/damon_falck/blackboxbandits/experiments", "--data-root": "/home/damon_falck/blackboxbandits/experiments/penn_datasets", "--db": "bo_20220228_124924_b7rkpeqg", "--opt": "OpenTuner-GA-DE", "--data": "clf-texture", "--classifier": "lasso", "--metric": "nll", "--calls": 20, "--suggestions": 1, "--jobs-file": null, "--verbose": false, "dry_run": false, "rev": "bd14afd", "opt_rev": "0.8.7"}, "signature": [[{"C": 1.5676677195506077, "intercept_scaling": 7.257005721594282}, {"C": 2.57663857461359, "intercept_scaling": 1.5119336467641016}, {"C": 0.49501595537331966, "intercept_scaling": 3.833332156156665}, {"C": 0.5627932047415171, "intercept_scaling": 36.905577292137636}, {"C": 71.55682161754872, "intercept_scaling": 0.34179529120610125}], [0.044501065000671865, 0.035335529940508384, 0.08618494061689971, 0.0779045533709111, 0.019556687936390232]]},
"data": {"coords": {"iter": {"dims": ["iter"], "attrs": {}, "data": [0, 1, 2, 3, 4, 5, 6, 7, 8, 9, 10, 11, 12, 13, 14, 15, 16, 17, 18, 19]}, "suggestion": {"dims": ["suggestion"], "attrs": {}, "data": [0]}}, "attrs": {}, "dims": {"iter": 20, "suggestion": 1}, "data_vars": {"C": {"dims": ["iter", "suggestion"], "attrs": {}, "data": [[41.98608657469572], [11.440923539938623], [6.346538509911372], [2.5080495592349616], [8.910125558314775], [0.7831574327107411], [41.98608657469572], [14.334809358808032], [13.071889954826467], [48.46489116239034], [49.23064148940754], [10.078325143109208], [41.98608657469572], [60.41436760455598], [0.5829816545607458], [3.1585552558722414], [0.8782454330661167], [41.98608657469572], [41.98608657469572], [75.62542630946345]]}, "intercept_scaling": {"dims": ["iter", "suggestion"], "attrs": {}, "data": [[12.599765965037776], [7.069597754670189], [99.54963963533685], [12.599765965037776], [35.55286647600603], [12.599765965037776], [16.421334899898604], [12.599765965037776], [52.473019828136316], [1.3209282974871048], [0.37826824860399233], [9.70449852943989], [17.229366499733857], [70.8670257663821], [1.564786300601812], [1.736418973169777], [20.579276306410595], [2.316575250535844], [16.188735983660983], [2.316575250535844]]}}}}
