# Supplementary material
Source: ML conference proceedings conference paper supplement (https://proceedings.neurips.cc/paper_files/paper/2022/hash/31a57804448363bcab777f818f75f5b4-Abstract.html)
Supplement: Supplementary file 1 [file 31a57804448363bcab777f818f75f5b4-Supplemental-Conference.zip › trading_off_resource_budgets_f-Supplementary Material/code_and_data/experiments/base_results/bo_20220228_124924_b7rkpeqg/suggest_log/0166ca06f76e5b02a8d699ed5cf192dc.json]

{"meta": {"args": {"--uuid": "0166ca06f76e5b02a8d699ed5cf192dc", "-db-root": "/home/damon_falck/blackboxbandits/experiments/saved_results", "--opt-root": "/home/damon_falck/blackboxbandits/experiments", "--data-root": "/home/damon_falck/blackboxbandits/experiments/penn_datasets", "--db": "bo_20220228_124924_b7rkpeqg", "--opt": "OpenTuner-GA", "--data": "reg-1193-BNG-lowbwt", "--classifier": "MLP-adam", "--metric": "mse", "--calls": 20, "--suggestions": 1, "--jobs-file": null, "--verbose": false, "dry_run": false, "rev": "bd14afd", "opt_rev": "0.8.7"}, "signature": [[{"alpha": 0.019628224813442792, "batch_size": 182, "beta_1": 0.9410202200271762, "beta_2": 0.9998021557676793, "epsilon": 1.8662266976518e-08, "hidden_layer_sizes": 147, "learning_rate_init": 0.0005627932047415167, "tol": 0.03690557729213761, "validation_fraction": 0.8846827852548593}, {"alpha": 0.001998246739232944, "batch_size": 200, "beta_1": 0.919111482530466, "beta_2": 0.9998488260436156, "epsilon": 5.981221901152555e-07, "hidden_layer_sizes": 61, "learning_rate_init": 2.2310905607443014e-05, "tol": 1.2046852412030316e-05, "validation_fraction": 0.8117896445826539}, {"alpha": 0.46659545670218433, "batch_size": 219, "beta_1": 0.9889789783750891, "beta_2": 0.9999896868093284, "epsilon": 2.4234724484675948e-08, "hidden_layer_sizes": 167, "learning_rate_init": 2.972334644335654e-05, "tol": 0.0036281404040243792, "validation_fraction": 0.17260651658522078}, {"alpha": 4.656005689076002, "batch_size": 135, "beta_1": 0.870503881627747, "beta_2": 0.9948873266941017, "epsilon": 2.1023308743480125e-07, "hidden_layer_sizes": 118, "learning_rate_init": 0.001878173875716191, "tol": 1.1889379831773006e-05, "validation_fraction": 0.6264327093752792}, {"alpha": 0.04705159350400542, "batch_size": 158, "beta_1": 0.9870884262730957, "beta_2": 0.9999596874382349, "epsilon": 1.1981845126013875e-08, "hidden_layer_sizes": 116, "learning_rate_init": 0.006173405204074311, "tol": 1.7414134181586194e-05, "validation_fraction": 0.6754299026638921}], [0.3824867982621996, 0.4125152511739187, 0.3831986661854103, 0.3785572070852033, 0.36639413584693625]]},
"data": {"coords": {"iter": {"dims": ["iter"], "attrs": {}, "data": [0, 1, 2, 3, 4, 5, 6, 7, 8, 9, 10, 11, 12, 13, 14, 15, 16, 17, 18, 19]}, "suggestion": {"dims": ["suggestion"], "attrs": {}, "data": [0]}}, "attrs": {}, "dims": {"iter": 20, "suggestion": 1}, "data_vars": {"alpha": {"dims": ["iter", "suggestion"], "attrs": {}, "data": [[0.28971740378816596], [0.28971740378816596], [7.8380353749078235], [1.279470286540632], [0.28971740378816596], [0.7022063008261544], [3.268495435698903], [0.7022063008261544], [0.9123189013444187], [3.4502416007773085], [0.9123189013444187], [0.9123189013444187], [0.9123189013444187], [0.23284227590458445], [0.9123189013444187], [5.765933913562069], [0.9123189013444187], [0.9123189013444187], [0.9123189013444187], [0.9123189013444187]]}, "batch_size": {"dims": ["iter", "suggestion"], "attrs": {}, "data": [[130], [130], [19], [130], [130], [171], [187], [171], [171], [218], [171], [171], [171], [131], [171], [154], [171], [171], [171], [171]]}, "beta_1": {"dims": ["iter", "suggestion"], "attrs": {}, "data": [[0.6041307923865565], [0.6041307923865565], [0.5324093204612721], [0.6041307923865565], [0.6041307923865565], [0.6756669157787356], [0.6544844909715567], [0.6756669157787356], [0.6756669157787356], [0.6806862468491106], [0.6756669157787356], [0.6756669157787356], [0.6756669157787356], [0.7068975957007022], [0.6756669157787356], [0.8319353230548503], [0.6756669157787356], [0.6160749155646921], [0.6756669157787356], [0.6756669157787356]]}, "beta_2": {"dims": ["iter", "suggestion"], "attrs": {}, "data": [[0.9632440687644049], [0.9632440687644049], [0.9461767226731106], [0.9632440687644049], [0.9632440687644049], [0.9542783887015008], [0.9080517157623966], [0.9542783887015008], [0.9542783887015008], [0.9305419641361589], [0.9542783887015008], [0.9542783887015008], [0.9542783887015008], [0.9408670704038564], [0.9542783887015008], [0.9603302177244495], [0.9542783887015008], [0.9542783887015008], [0.9542783887015008], [0.9542783887015008]]}, "epsilon": {"dims": ["iter", "suggestion"], "attrs": {}, "data": [[2.197267537415348e-08], [2.197267537415348e-08], [2.6659964597579687e-08], [2.197267537415348e-08], [2.197267537415348e-08], [5.124628585101144e-07], [4.920864934704051e-07], [5.124628585101144e-07], [5.124628585101144e-07], [1.81017127126305e-08], [5.124628585101144e-07], [7.698291281393589e-07], [7.698291281393589e-07], [6.843856742716193e-07], [7.698291281393589e-07], [9.996369087222614e-07], [7.698291281393589e-07], [7.698291281393589e-07], [7.698291281393589e-07], [7.698291281393589e-07]]}, "hidden_layer_sizes": {"dims": ["iter", "suggestion"], "attrs": {}, "data": [[142], [142], [128], [142], [142], [150], [190], [150], [150], [189], [150], [150], [150], [53], [150], [54], [85], [85], [85], [85]]}, "learning_rate_init": {"dims": ["iter", "suggestion"], "attrs": {}, "data": [[0.0604096699848155], [0.0604096699848155], [0.04057520995328783], [0.0604096699848155], [0.0604096699848155], [0.013516924839395972], [0.08917082469590525], [0.013516924839395972], [0.013516924839395972], [0.0954212684943913], [0.0015115107990279386], [0.0015115107990279386], [0.0015115107990279386], [0.07442339491567866], [0.0015115107990279386], [0.0281934356742916], [0.0015115107990279386], [0.0015115107990279386], [0.0015115107990279386], [0.0015115107990279386]]}, "tol": {"dims": ["iter", "suggestion"], "attrs": {}, "data": [[0.08761646153538465], [0.009144760667922847], [0.025492834596046055], [0.009144760667922847], [0.05104756857375475], [0.01655030434952647], [0.04519460022390936], [0.01655030434952647], [0.01655030434952647], [0.0039431563026325785], [0.01655030434952647], [0.01655030434952647], [0.01655030434952647], [0.04712982711180052], [0.01655030434952647], [0.09894745631107031], [0.01655030434952647], [0.01655030434952647], [0.029977900048471607], [0.01655030434952647]]}, "validation_fraction": {"dims": ["iter", "suggestion"], "attrs": {}, "data": [[0.2620307949645272], [0.2620307949645272], [0.682065448249422], [0.2620307949645272], [0.2620307949645272], [0.12453073430850613], [0.34411659982232523], [0.11413323629544143], [0.12453073430850613], [0.788030889250866], [0.12453073430850613], [0.12453073430850613], [0.6249450824808578], [0.1499154516097394], [0.2732698247925205], [0.17642670146386266], [0.12453073430850613], [0.12453073430850613], [0.12453073430850613], [0.8625668789753038]]}}}}
