# Supplementary material
Source: ML conference proceedings conference paper supplement (https://proceedings.neurips.cc/paper_files/paper/2022/hash/31a57804448363bcab777f818f75f5b4-Abstract.html)
Supplement: Supplementary file 1 [file 31a57804448363bcab777f818f75f5b4-Supplemental-Conference.zip › trading_off_resource_budgets_f-Supplementary Material/code_and_data/experiments/base_results/bo_20220228_124924_b7rkpeqg/suggest_log/0169abcdd501500fb9f18b08333359aa.json]

{"meta": {"args": {"--uuid": "0169abcdd501500fb9f18b08333359aa", "-db-root": "/home/damon_falck/blackboxbandits/experiments/saved_results", "--opt-root": "/home/damon_falck/blackboxbandits/experiments", "--data-root": "/home/damon_falck/blackboxbandits/experiments/penn_datasets", "--db": "bo_20220228_124924_b7rkpeqg", "--opt": "Scikit-GBRT-Hedge", "--data": "reg-294-satellite-image", "--classifier": "lasso", "--metric": "mse", "--calls": 20, "--suggestions": 1, "--jobs-file": null, "--verbose": false, "dry_run": false, "rev": "bd14afd", "opt_rev": "0.9.0"}, "signature": [[{"alpha": 1.5676677195506077, "fit_intercept": true, "max_iter": 423, "normalize": true, "positive": false, "tol": 0.0038333321561566623}, {"alpha": 0.5627932047415171, "fit_intercept": true, "max_iter": 3989, "normalize": false, "positive": true, "tol": 0.001304907355036239}, {"alpha": 1.871450068624068, "fit_intercept": true, "max_iter": 16, "normalize": false, "positive": false, "tol": 0.021403233140986057}, {"alpha": 12.960656597279737, "fit_intercept": true, "max_iter": 4378, "normalize": true, "positive": false, "tol": 0.013246974647468445}, {"alpha": 0.029723346443356558, "fit_intercept": true, "max_iter": 24, "normalize": true, "positive": true, "tol": 0.00045566719139214756}], [1.1930518151278597, 1.1930518151278597, 1.1930518151278597, 1.1930518151278597, 1.1930518151278597]]},
"data": {"coords": {"iter": {"dims": ["iter"], "attrs": {}, "data": [0, 1, 2, 3, 4, 5, 6, 7, 8, 9, 10, 11, 12, 13, 14, 15, 16, 17, 18, 19]}, "suggestion": {"dims": ["suggestion"], "attrs": {}, "data": [0]}}, "attrs": {}, "dims": {"iter": 20, "suggestion": 1}, "data_vars": {"alpha": {"dims": ["iter", "suggestion"], "attrs": {}, "data": [[2.7890984870577666], [5.043403507308342], [16.52843366956243], [0.02686156083033962], [1.0445032917944266], [0.23742321897580534], [0.07938581314028256], [0.34641612409315187], [62.88931317326897], [0.13191402017369178], [0.05049239934998538], [0.15874543378504125], [2.077495746276877], [0.04254072832452693], [2.3005223375987587], [0.14220327728139825], [0.060098828518610876], [0.08509625479751072], [0.05413113172963666], [0.062316219769403845]]}, "fit_intercept": {"dims": ["iter", "suggestion"], "attrs": {}, "data": [[0], [0], [1], [0], [1], [1], [1], [1], [1], [1], [0], [1], [1], [1], [0], [0], [0], [0], [0], [0]]}, "max_iter": {"dims": ["iter", "suggestion"], "attrs": {}, "data": [[2613], [4751], [1282], [2411], [3168], [3918], [2522], [2533], [4341], [3846], [633], [817], [603], [697], [423], [535], [582], [649], [585], [45]]}, "normalize": {"dims": ["iter", "suggestion"], "attrs": {}, "data": [[0], [1], [0], [1], [1], [0], [1], [0], [1], [0], [1], [1], [1], [1], [0], [1], [1], [1], [0], [0]]}, "positive": {"dims": ["iter", "suggestion"], "attrs": {}, "data": [[0], [0], [1], [1], [1], [1], [1], [1], [1], [0], [0], [0], [1], [0], [0], [0], [0], [0], [1], [0]]}, "tol": {"dims": ["iter", "suggestion"], "attrs": {}, "data": [[0.07736505593608362], [0.0017731051357826049], [0.0005689751611855527], [0.0009258664760642227], [0.0035768501567314233], [0.007100618784602216], [2.7304765374038515e-05], [0.04743799560418535], [0.0018941306507265418], [1.4920355419401824e-05], [0.00013092962942555072], [5.284342976903239e-05], [0.0879298089533712], [4.266125824835032e-05], [1.0718402281017039e-05], [9.161166981615962e-05], [0.00022831420658644285], [0.00019813600005843656], [7.214002700432945e-05], [8.630117410596197e-05]]}}}}
