# Supplementary material
Source: ML conference proceedings conference paper supplement (https://proceedings.neurips.cc/paper_files/paper/2022/hash/31a57804448363bcab777f818f75f5b4-Abstract.html)
Supplement: Supplementary file 1 [file 31a57804448363bcab777f818f75f5b4-Supplemental-Conference.zip › trading_off_resource_budgets_f-Supplementary Material/code_and_data/experiments/base_results/bo_20220228_124924_b7rkpeqg/suggest_log/0174c21765605d7fbebe9918362110a7.json]

{"meta": {"args": {"--uuid": "0174c21765605d7fbebe9918362110a7", "-db-root": "/home/damon_falck/blackboxbandits/experiments/saved_results", "--opt-root": "/home/damon_falck/blackboxbandits/experiments", "--data-root": "/home/damon_falck/blackboxbandits/experiments/penn_datasets", "--db": "bo_20220228_124924_b7rkpeqg", "--opt": "OpenTuner-GA", "--data": "clf-sonar", "--classifier": "lasso", "--metric": "nll", "--calls": 20, "--suggestions": 1, "--jobs-file": null, "--verbose": false, "dry_run": false, "rev": "bd14afd", "opt_rev": "0.8.7"}, "signature": [[{"C": 1.5676677195506077, "intercept_scaling": 7.257005721594282}, {"C": 2.57663857461359, "intercept_scaling": 1.5119336467641016}, {"C": 0.49501595537331966, "intercept_scaling": 3.833332156156665}, {"C": 0.5627932047415171, "intercept_scaling": 36.905577292137636}, {"C": 71.55682161754872, "intercept_scaling": 0.34179529120610125}], [0.6195766226226135, 0.7297043740402759, 0.5356533922829645, 0.5445623338088144, 2.631318177385058]]},
"data": {"coords": {"iter": {"dims": ["iter"], "attrs": {}, "data": [0, 1, 2, 3, 4, 5, 6, 7, 8, 9, 10, 11, 12, 13, 14, 15, 16, 17, 18, 19]}, "suggestion": {"dims": ["suggestion"], "attrs": {}, "data": [0]}}, "attrs": {}, "dims": {"iter": 20, "suggestion": 1}, "data_vars": {"C": {"dims": ["iter", "suggestion"], "attrs": {}, "data": [[0.645163590656743], [0.30086705777918343], [0.30086705777918343], [6.872380732178055], [0.30086705777918343], [0.4488231445730302], [14.870898091432101], [9.898305896036474], [0.30086705777918343], [0.30086705777918343], [16.35980031956736], [0.452439741196655], [3.9721694550625113], [0.31129308423895075], [0.3380230231162047], [2.6627250610236586], [0.30086705777918343], [4.153542688284292], [11.834911209579456], [0.21448097745344352]]}, "intercept_scaling": {"dims": ["iter", "suggestion"], "attrs": {}, "data": [[46.23053868036929], [1.9088599241706425], [93.90031936237044], [34.235408709278964], [2.013675637837498], [1.9088599241706425], [4.882567470097476], [41.111701019634815], [1.0875629865206313], [5.442061214602753], [1.0875629865206313], [2.2820377762170057], [2.7162879378242515], [1.0875629865206313], [44.998275753576806], [16.15862967614165], [22.205323840602002], [19.986120423339845], [1.0875629865206313], [18.748740949979457]]}}}}
