# Supplementary material
Source: ML conference proceedings conference paper supplement (https://proceedings.neurips.cc/paper_files/paper/2022/hash/31a57804448363bcab777f818f75f5b4-Abstract.html)
Supplement: Supplementary file 1 [file 31a57804448363bcab777f818f75f5b4-Supplemental-Conference.zip › trading_off_resource_budgets_f-Supplementary Material/code_and_data/experiments/base_results/bo_20220228_124924_b7rkpeqg/suggest_log/0181c9b584d85ab09934dbc41e8e5591.json]

{"meta": {"args": {"--uuid": "0181c9b584d85ab09934dbc41e8e5591", "-db-root": "/home/damon_falck/blackboxbandits/experiments/saved_results", "--opt-root": "/home/damon_falck/blackboxbandits/experiments", "--data-root": "/home/damon_falck/blackboxbandits/experiments/penn_datasets", "--db": "bo_20220228_124924_b7rkpeqg", "--opt": "Scikit-GP-LCB", "--data": "reg-690-visualizing-galaxy", "--classifier": "lasso", "--metric": "mse", "--calls": 20, "--suggestions": 1, "--jobs-file": null, "--verbose": false, "dry_run": false, "rev": "bd14afd", "opt_rev": "0.9.0"}, "signature": [[{"alpha": 1.5676677195506077, "fit_intercept": true, "max_iter": 423, "normalize": true, "positive": false, "tol": 0.0038333321561566623}, {"alpha": 0.5627932047415171, "fit_intercept": true, "max_iter": 3989, "normalize": false, "positive": true, "tol": 0.001304907355036239}, {"alpha": 1.871450068624068, "fit_intercept": true, "max_iter": 16, "normalize": false, "positive": false, "tol": 0.021403233140986057}, {"alpha": 12.960656597279737, "fit_intercept": true, "max_iter": 4378, "normalize": true, "positive": false, "tol": 0.013246974647468445}, {"alpha": 0.029723346443356558, "fit_intercept": true, "max_iter": 24, "normalize": true, "positive": true, "tol": 0.00045566719139214756}], [0.9160685394884517, 0.8347442575403428, 0.9160685394884517, 0.9160685394884517, 0.6985449474385834]]},
"data": {"coords": {"iter": {"dims": ["iter"], "attrs": {}, "data": [0, 1, 2, 3, 4, 5, 6, 7, 8, 9, 10, 11, 12, 13, 14, 15, 16, 17, 18, 19]}, "suggestion": {"dims": ["suggestion"], "attrs": {}, "data": [0]}}, "attrs": {}, "dims": {"iter": 20, "suggestion": 1}, "data_vars": {"alpha": {"dims": ["iter", "suggestion"], "attrs": {}, "data": [[0.22964868978607203], [0.05569040094833091], [0.05056600250112203], [21.80329703052776], [55.50145718789317], [0.01], [0.01], [0.023316978304040937], [0.024011070850901706], [0.01], [0.014044621753067404], [0.013906046600545702], [0.012330721182821152], [0.026507744562912557], [0.025392850578118215], [0.018800801272358825], [0.09130335619381233], [0.08543925751581333], [0.01], [0.044113330822075365]]}, "fit_intercept": {"dims": ["iter", "suggestion"], "attrs": {}, "data": [[0], [0], [0], [0], [0], [0], [1], [1], [0], [1], [0], [0], [1], [0], [0], [0], [1], [1], [1], [1]]}, "max_iter": {"dims": ["iter", "suggestion"], "attrs": {}, "data": [[2579], [1252], [2441], [2281], [2363], [664], [982], [5000], [10], [5000], [10], [5000], [10], [5000], [5000], [2455], [5000], [10], [5000], [5000]]}, "normalize": {"dims": ["iter", "suggestion"], "attrs": {}, "data": [[0], [0], [1], [0], [1], [1], [0], [0], [1], [0], [0], [1], [1], [0], [0], [0], [0], [0], [0], [0]]}, "positive": {"dims": ["iter", "suggestion"], "attrs": {}, "data": [[1], [0], [1], [0], [1], [0], [1], [0], [0], [0], [0], [0], [0], [0], [0], [0], [0], [0], [0], [0]]}, "tol": {"dims": ["iter", "suggestion"], "attrs": {}, "data": [[0.09386990533483416], [2.9086794946086838e-05], [1.4506310628715009e-05], [4.533312120660513e-05], [0.0119768612844737], [0.01985301199548553], [0.05369097154521804], [0.1], [1e-05], [1e-05], [1e-05], [1e-05], [1e-05], [0.1], [0.1], [1e-05], [1e-05], [0.1], [0.1], [1e-05]]}}}}
