# Supplementary material
Source: ML conference proceedings conference paper supplement (https://proceedings.neurips.cc/paper_files/paper/2022/hash/31a57804448363bcab777f818f75f5b4-Abstract.html)
Supplement: Supplementary file 1 [file 31a57804448363bcab777f818f75f5b4-Supplemental-Conference.zip › trading_off_resource_budgets_f-Supplementary Material/code_and_data/experiments/base_results/bo_20220228_124924_b7rkpeqg/suggest_log/0235ba1450c4554cbddebdca1cfe1484.json]

{"meta": {"args": {"--uuid": "0235ba1450c4554cbddebdca1cfe1484", "-db-root": "/home/damon_falck/blackboxbandits/experiments/saved_results", "--opt-root": "/home/damon_falck/blackboxbandits/experiments", "--data-root": "/home/damon_falck/blackboxbandits/experiments/penn_datasets", "--db": "bo_20220228_124924_b7rkpeqg", "--opt": "OpenTuner-GA", "--data": "clf-analcatdata-bankruptcy", "--classifier": "lasso", "--metric": "nll", "--calls": 20, "--suggestions": 1, "--jobs-file": null, "--verbose": false, "dry_run": false, "rev": "bd14afd", "opt_rev": "0.8.7"}, "signature": [[{"C": 1.5676677195506077, "intercept_scaling": 7.257005721594282}, {"C": 2.57663857461359, "intercept_scaling": 1.5119336467641016}, {"C": 0.49501595537331966, "intercept_scaling": 3.833332156156665}, {"C": 0.5627932047415171, "intercept_scaling": 36.905577292137636}, {"C": 71.55682161754872, "intercept_scaling": 0.34179529120610125}], [0.2572348699039399, 0.2837068079505468, 0.2878288983492504, 0.27910881834693335, 1.056146252216579]]},
"data": {"coords": {"iter": {"dims": ["iter"], "attrs": {}, "data": [0, 1, 2, 3, 4, 5, 6, 7, 8, 9, 10, 11, 12, 13, 14, 15, 16, 17, 18, 19]}, "suggestion": {"dims": ["suggestion"], "attrs": {}, "data": [0]}}, "attrs": {}, "dims": {"iter": 20, "suggestion": 1}, "data_vars": {"C": {"dims": ["iter", "suggestion"], "attrs": {}, "data": [[5.861548362290586], [5.861548362290586], [10.767321198501964], [7.692438376985676], [67.33589344125731], [0.4429510610383811], [0.014184018534549639], [0.4429510610383811], [2.071687262496005], [22.091784960079412], [7.62992600239401], [7.184483107985081], [2.071687262496005], [2.071687262496005], [0.8316961661770801], [14.627416674185174], [60.08561459324944], [0.8316961661770801], [16.16614747252698], [0.10599399902607275]]}, "intercept_scaling": {"dims": ["iter", "suggestion"], "attrs": {}, "data": [[46.54916990787916], [0.030677132269852685], [12.066027148301291], [48.58033414741682], [0.030677132269852685], [0.030677132269852685], [1.2810519780767395], [1.1439169483325162], [9.791005191658428], [25.431824343992126], [9.791005191658428], [9.791005191658428], [1.015865028261839], [53.1707104381298], [1.015865028261839], [0.018301201975600805], [1.015865028261839], [0.23021410428080347], [1.015865028261839], [1.015865028261839]]}}}}
