# Supplementary material
Source: ML conference proceedings conference paper supplement (https://proceedings.neurips.cc/paper_files/paper/2022/hash/31a57804448363bcab777f818f75f5b4-Abstract.html)
Supplement: Supplementary file 1 [file 31a57804448363bcab777f818f75f5b4-Supplemental-Conference.zip › trading_off_resource_budgets_f-Supplementary Material/code_and_data/experiments/base_results/bo_20220228_124924_b7rkpeqg/suggest_log/0285efba6f205ac980083ee9094d7cab.json]

{"meta": {"args": {"--uuid": "0285efba6f205ac980083ee9094d7cab", "-db-root": "/home/damon_falck/blackboxbandits/experiments/saved_results", "--opt-root": "/home/damon_falck/blackboxbandits/experiments", "--data-root": "/home/damon_falck/blackboxbandits/experiments/penn_datasets", "--db": "bo_20220228_124924_b7rkpeqg", "--opt": "HyperOpt", "--data": "reg-626-fri-c2-500-50", "--classifier": "MLP-adam", "--metric": "mse", "--calls": 20, "--suggestions": 1, "--jobs-file": null, "--verbose": false, "dry_run": false, "rev": "bd14afd", "opt_rev": "0.2.7"}, "signature": [[{"alpha": 0.019628224813442792, "batch_size": 182, "beta_1": 0.9410202200271762, "beta_2": 0.9998021557676793, "epsilon": 1.8662266976518e-08, "hidden_layer_sizes": 147, "learning_rate_init": 0.0005627932047415167, "tol": 0.03690557729213761, "validation_fraction": 0.8846827852548593}, {"alpha": 0.001998246739232944, "batch_size": 200, "beta_1": 0.919111482530466, "beta_2": 0.9998488260436156, "epsilon": 5.981221901152555e-07, "hidden_layer_sizes": 61, "learning_rate_init": 2.2310905607443014e-05, "tol": 1.2046852412030316e-05, "validation_fraction": 0.8117896445826539}, {"alpha": 0.46659545670218433, "batch_size": 219, "beta_1": 0.9889789783750891, "beta_2": 0.9999896868093284, "epsilon": 2.4234724484675948e-08, "hidden_layer_sizes": 167, "learning_rate_init": 2.972334644335654e-05, "tol": 0.0036281404040243792, "validation_fraction": 0.17260651658522078}, {"alpha": 4.656005689076002, "batch_size": 135, "beta_1": 0.870503881627747, "beta_2": 0.9948873266941017, "epsilon": 2.1023308743480125e-07, "hidden_layer_sizes": 118, "learning_rate_init": 0.001878173875716191, "tol": 1.1889379831773006e-05, "validation_fraction": 0.6264327093752792}, {"alpha": 0.04705159350400542, "batch_size": 158, "beta_1": 0.9870884262730957, "beta_2": 0.9999596874382349, "epsilon": 1.1981845126013875e-08, "hidden_layer_sizes": 116, "learning_rate_init": 0.006173405204074311, "tol": 1.7414134181586194e-05, "validation_fraction": 0.6754299026638921}], [1.1923987405933443, 1.97639079405441, 1.309127220211587, 1.0388246467581812, 1.2110441214057368]]},
"data": {"coords": {"iter": {"dims": ["iter"], "attrs": {}, "data": [0, 1, 2, 3, 4, 5, 6, 7, 8, 9, 10, 11, 12, 13, 14, 15, 16, 17, 18, 19]}, "suggestion": {"dims": ["suggestion"], "attrs": {}, "data": [0]}}, "attrs": {}, "dims": {"iter": 20, "suggestion": 1}, "data_vars": {"alpha": {"dims": ["iter", "suggestion"], "attrs": {}, "data": [[1.864942313787067], [3.506692979421362e-05], [0.022203334392427335], [0.06401537958689699], [0.0015806086746423494], [2.131763766474011], [1.2657534992798268e-05], [0.0009686778118957114], [8.758437477540753e-05], [1.598863372268434], [0.44327195191428803], [0.00128641906269463], [1.8368486169353164], [0.0002966228549062883], [6.514319445084955], [0.0002711110116285434], [0.03261116275505885], [0.0025582372387999656], [0.0005422755760692056], [0.046827457802749495]]}, "batch_size": {"dims": ["iter", "suggestion"], "attrs": {}, "data": [[208], [38], [159], [168], [73], [180], [147], [187], [53], [79], [206], [193], [132], [202], [241], [45], [41], [103], [15], [137]]}, "beta_1": {"dims": ["iter", "suggestion"], "attrs": {}, "data": [[0.6284131547280595], [0.8826766272898025], [0.8243280273488182], [0.7274577630519984], [0.7771635789967869], [0.5073722867154912], [0.6880439693423095], [0.6052307408611133], [0.5897480996977981], [0.5755224659791156], [0.7390881530788763], [0.5150335523485013], [0.5138884412733584], [0.9898721042455969], [0.5208087839994192], [0.7710894690622878], [0.5361145158798049], [0.6352447645891315], [0.6863291214208922], [0.7387472829713922]]}, "beta_2": {"dims": ["iter", "suggestion"], "attrs": {}, "data": [[0.9143389555091397], [0.9449310353086048], [0.9366503798159242], [0.9478507025180873], [0.9436348059772434], [0.9622942386563649], [0.9100979779323974], [0.978336312394197], [0.9978100912427944], [0.9052323427111187], [0.9355221965391591], [0.9903122343927461], [0.918622295075491], [0.9915323516815722], [0.9470378719543335], [0.9292423499755537], [0.9237413823186379], [0.9614371673746972], [0.9796341044621846], [0.9856401236776545]]}, "epsilon": {"dims": ["iter", "suggestion"], "attrs": {}, "data": [[1.4198383188997562e-07], [2.7581154797331645e-08], [8.233409237471802e-08], [5.1189665814260484e-09], [6.66232105023623e-09], [1.9820749059015977e-08], [5.446312157911059e-07], [9.538740758575325e-07], [1.6981033183483704e-09], [1.7422659726154242e-09], [2.321820748160488e-09], [1.8507949832284914e-07], [1.3757521721916097e-08], [3.7392283356902425e-07], [1.4841837352287817e-09], [5.076102809997647e-09], [1.395787212664882e-09], [1.5654347636647397e-08], [1.9268433054677298e-09], [3.046715160948746e-08]]}, "hidden_layer_sizes": {"dims": ["iter", "suggestion"], "attrs": {}, "data": [[62], [132], [162], [95], [144], [175], [105], [148], [102], [123], [81], [54], [54], [54], [169], [121], [97], [95], [135], [62]]}, "learning_rate_init": {"dims": ["iter", "suggestion"], "attrs": {}, "data": [[0.009374221137045164], [0.0004286728175744378], [0.00021450172231781846], [0.0006353356790126183], [7.586913429113906e-05], [0.0019983290212818947], [0.006701728827924526], [0.013624581604468002], [0.00016957808498511149], [0.00781879076626794], [0.000964359935786914], [0.01177448040629427], [0.012535409701743695], [1.281734172899709e-05], [0.01893912233711162], [8.433884170399614e-05], [0.06131721598196607], [0.05226468132797272], [0.00043355784534863544], [1.2645823637824598e-05]]}, "tol": {"dims": ["iter", "suggestion"], "attrs": {}, "data": [[0.0010791289894238098], [3.3955238517853474e-05], [0.0013927080989765634], [1.1630345633321221e-05], [0.012193437889960898], [0.023987337575650254], [0.00021457148545434734], [0.0006367782476284227], [1.8790572285877495e-05], [0.0003514261357344432], [1.6196617652195434e-05], [0.003944101764840962], [0.005262330405242909], [0.0005817526680103316], [0.0002153891619124904], [0.06132922285636371], [2.1740365032192196e-05], [2.320419145993917e-05], [0.009054957309247725], [0.000537089605018534]]}, "validation_fraction": {"dims": ["iter", "suggestion"], "attrs": {}, "data": [[0.11873090268924315], [0.3748221467878712], [0.7233080813137126], [0.3199932959801584], [0.1027780045424318], [0.10762720352134435], [0.1417331176476517], [0.1848846877892894], [0.13883501123743053], [0.31121165298344483], [0.7643271950446986], [0.2283134546537609], [0.30826981545911286], [0.5196136356740981], [0.18177191515961647], [0.19272457130953], [0.10818291907103678], [0.21614876901691912], [0.2968641773375997], [0.24353648453323712]]}}}}
