# Supplementary material
Source: ML conference proceedings conference paper supplement (https://proceedings.neurips.cc/paper_files/paper/2022/hash/31a57804448363bcab777f818f75f5b4-Abstract.html)
Supplement: Supplementary file 1 [file 31a57804448363bcab777f818f75f5b4-Supplemental-Conference.zip › trading_off_resource_budgets_f-Supplementary Material/code_and_data/experiments/base_results/bo_20220228_124924_b7rkpeqg/suggest_log/0291b9da98985c46980380ca01563895.json]

{"meta": {"args": {"--uuid": "0291b9da98985c46980380ca01563895", "-db-root": "/home/damon_falck/blackboxbandits/experiments/saved_results", "--opt-root": "/home/damon_falck/blackboxbandits/experiments", "--data-root": "/home/damon_falck/blackboxbandits/experiments/penn_datasets", "--db": "bo_20220228_124924_b7rkpeqg", "--opt": "PySOT", "--data": "clf-analcatdata-aids", "--classifier": "lasso", "--metric": "nll", "--calls": 20, "--suggestions": 1, "--jobs-file": null, "--verbose": false, "dry_run": false, "rev": "bd14afd", "opt_rev": "0.3.3"}, "signature": [[{"C": 1.5676677195506077, "intercept_scaling": 7.257005721594282}, {"C": 2.57663857461359, "intercept_scaling": 1.5119336467641016}, {"C": 0.49501595537331966, "intercept_scaling": 3.833332156156665}, {"C": 0.5627932047415171, "intercept_scaling": 36.905577292137636}, {"C": 71.55682161754872, "intercept_scaling": 0.34179529120610125}], [0.707590990416181, 0.7555033545774056, 0.6574194034275792, 0.6581756948558957, 1.2767164948202967]]},
"data": {"coords": {"iter": {"dims": ["iter"], "attrs": {}, "data": [0, 1, 2, 3, 4, 5, 6, 7, 8, 9, 10, 11, 12, 13, 14, 15, 16, 17, 18, 19]}, "suggestion": {"dims": ["suggestion"], "attrs": {}, "data": [0]}}, "attrs": {}, "dims": {"iter": 20, "suggestion": 1}, "data_vars": {"C": {"dims": ["iter", "suggestion"], "attrs": {}, "data": [[100.0], [15.848931924611165], [2.5118864315095815], [0.3981071705534977], [0.06309573444801937], [0.010000000000000005], [0.010090561186592812], [0.8584521495630377], [0.11760750581616936], [0.07503843604212425], [5.664324012262668], [0.011391122194076808], [0.5675707148463458], [0.4308364255753117], [0.08185264679932618], [0.4527041228184608], [0.3645830066286317], [0.43949459915170214], [1.1533507416759323], [0.20456162154000862]]}, "intercept_scaling": {"dims": ["iter", "suggestion"], "attrs": {}, "data": [[0.010000000000000005], [0.3981071705534977], [15.848931924611165], [0.06309573444801937], [2.5118864315095815], [100.0], [0.035280514544678974], [0.9641938036848215], [0.314859725386904], [0.010633309477451029], [0.0197168300759166], [0.5876155065125116], [0.32076177243588305], [0.6448585537284801], [0.053728743578897356], [2.7956287192507046], [0.14965459454386504], [0.10460079564514212], [0.02131773054360412], [0.02208633053565941]]}}}}
