# Supplementary material
Source: ML conference proceedings conference paper supplement (https://proceedings.neurips.cc/paper_files/paper/2022/hash/31a57804448363bcab777f818f75f5b4-Abstract.html)
Supplement: Supplementary file 1 [file 31a57804448363bcab777f818f75f5b4-Supplemental-Conference.zip › trading_off_resource_budgets_f-Supplementary Material/code_and_data/experiments/base_results/bo_20220228_124924_b7rkpeqg/suggest_log/0419bda126245f99b999f42811678969.json]

{"meta": {"args": {"--uuid": "0419bda126245f99b999f42811678969", "-db-root": "/home/damon_falck/blackboxbandits/experiments/saved_results", "--opt-root": "/home/damon_falck/blackboxbandits/experiments", "--data-root": "/home/damon_falck/blackboxbandits/experiments/penn_datasets", "--db": "bo_20220228_124924_b7rkpeqg", "--opt": "Scikit-GBRT-Hedge", "--data": "clf-mux6", "--classifier": "MLP-adam", "--metric": "nll", "--calls": 20, "--suggestions": 1, "--jobs-file": null, "--verbose": false, "dry_run": false, "rev": "bd14afd", "opt_rev": "0.9.0"}, "signature": [[{"alpha": 0.019628224813442792, "batch_size": 182, "beta_1": 0.9410202200271762, "beta_2": 0.9998021557676793, "epsilon": 1.8662266976518e-08, "hidden_layer_sizes": 147, "learning_rate_init": 0.0005627932047415167, "tol": 0.03690557729213761, "validation_fraction": 0.8846827852548593}, {"alpha": 0.001998246739232944, "batch_size": 200, "beta_1": 0.919111482530466, "beta_2": 0.9998488260436156, "epsilon": 5.981221901152555e-07, "hidden_layer_sizes": 61, "learning_rate_init": 2.2310905607443014e-05, "tol": 1.2046852412030316e-05, "validation_fraction": 0.8117896445826539}, {"alpha": 0.46659545670218433, "batch_size": 219, "beta_1": 0.9889789783750891, "beta_2": 0.9999896868093284, "epsilon": 2.4234724484675948e-08, "hidden_layer_sizes": 167, "learning_rate_init": 2.972334644335654e-05, "tol": 0.0036281404040243792, "validation_fraction": 0.17260651658522078}, {"alpha": 4.656005689076002, "batch_size": 135, "beta_1": 0.870503881627747, "beta_2": 0.9948873266941017, "epsilon": 2.1023308743480125e-07, "hidden_layer_sizes": 118, "learning_rate_init": 0.001878173875716191, "tol": 1.1889379831773006e-05, "validation_fraction": 0.6264327093752792}, {"alpha": 0.04705159350400542, "batch_size": 158, "beta_1": 0.9870884262730957, "beta_2": 0.9999596874382349, "epsilon": 1.1981845126013875e-08, "hidden_layer_sizes": 116, "learning_rate_init": 0.006173405204074311, "tol": 1.7414134181586194e-05, "validation_fraction": 0.6754299026638921}], [0.7214591579020737, 0.7179473790184533, 0.7216257493127094, 0.6311869032445974, 0.5819216277943177]]},
"data": {"coords": {"iter": {"dims": ["iter"], "attrs": {}, "data": [0, 1, 2, 3, 4, 5, 6, 7, 8, 9, 10, 11, 12, 13, 14, 15, 16, 17, 18, 19]}, "suggestion": {"dims": ["suggestion"], "attrs": {}, "data": [0]}}, "attrs": {}, "dims": {"iter": 20, "suggestion": 1}, "data_vars": {"alpha": {"dims": ["iter", "suggestion"], "attrs": {}, "data": [[1.5394083691327237e-05], [0.0020218513819966885], [0.0017718115357301435], [4.556013625908457], [0.005932950309529224], [0.00010246722857016419], [2.603194300096429], [2.568254075048974e-05], [1.6529363635455403e-05], [1.2625614381526536e-05], [1.4413956973377875e-05], [2.5202038553841333], [0.0020207108176112485], [0.5680230917973171], [0.0005863643639424501], [7.810308097159319], [0.005310748627399597], [0.006676572213412912], [4.532212247803957], [1.7239062662868394]]}, "batch_size": {"dims": ["iter", "suggestion"], "attrs": {}, "data": [[49], [246], [64], [77], [206], [36], [145], [230], [199], [52], [32], [242], [199], [247], [47], [129], [139], [238], [190], [102]]}, "beta_1": {"dims": ["iter", "suggestion"], "attrs": {}, "data": [[0.5303414918295967], [0.9270091364487667], [0.7774873796261156], [0.6646320184358951], [0.7852914941840898], [0.5744977523574238], [0.9165410410232683], [0.5011870339595613], [0.9235615167517063], [0.5193825202932497], [0.934015127023072], [0.9538933125540998], [0.9630545451382134], [0.9836824051034697], [0.9605865630737189], [0.96996287916467], [0.9436153333073082], [0.9817771064240265], [0.9637467177679816], [0.9007720194255084]]}, "beta_2": {"dims": ["iter", "suggestion"], "attrs": {}, "data": [[0.9536835995115404], [0.9324972439594816], [0.9782886853995326], [0.9612639632680952], [0.9159041324647647], [0.9605198696541248], [0.9376937285578562], [0.9704775132324094], [0.923204642515603], [0.9482722396522917], [0.9444451154065687], [0.9755528103192989], [0.9682118131548377], [0.9170449632784913], [0.9650841553529742], [0.9454823024193887], [0.9729652692747915], [0.9588336824626534], [0.9775521869509638], [0.9796781928355769]]}, "epsilon": {"dims": ["iter", "suggestion"], "attrs": {}, "data": [[4.613855003909941e-08], [6.577310315756583e-09], [6.322393537752012e-08], [1.0412760216570042e-08], [6.973655069799335e-07], [2.0395989008934286e-09], [1.7149384022378908e-09], [3.4063040868251947e-09], [4.8881538377404224e-08], [1.3761233578035284e-08], [4.110534716487177e-07], [1.778077972684099e-08], [2.3567728770908493e-07], [1.5447674269741784e-09], [5.382890460466809e-07], [5.998844333738658e-08], [4.66504772931877e-08], [3.940744315753787e-07], [2.5284448716514485e-07], [2.725579069397867e-07]]}, "hidden_layer_sizes": {"dims": ["iter", "suggestion"], "attrs": {}, "data": [[78], [94], [171], [184], [172], [52], [163], [156], [80], [189], [76], [82], [133], [154], [137], [50], [170], [125], [157], [84]]}, "learning_rate_init": {"dims": ["iter", "suggestion"], "attrs": {}, "data": [[0.08012012416959234], [0.0065039799789591264], [8.732153663311637e-05], [0.060588618307495255], [7.256655459185201e-05], [0.09595997736104757], [0.015446673201088952], [0.00030862266649000646], [0.0008452343872911524], [0.004026620189168643], [0.006889743594995328], [0.023981064293536608], [0.07967795429199541], [0.0137507891688572], [0.002575096729842588], [0.026569992987331155], [0.09513528435946848], [9.265753767217777e-05], [0.005953288707840897], [0.0040252004266107515]]}, "tol": {"dims": ["iter", "suggestion"], "attrs": {}, "data": [[0.004605624390917757], [0.08935091659564978], [0.0032744147308454686], [6.40814418582075e-05], [3.98705539931903e-05], [0.00011931742820276606], [0.00307281664126164], [0.054462865894607124], [0.08707535048168494], [0.09993894859706585], [0.0010688338247110327], [0.0012901851133341913], [0.003097521309054794], [0.0005264658679999912], [0.004776670838130694], [0.06358922353568477], [0.006345966024021314], [0.0004969443668853646], [0.0001195451796763532], [0.0010161581661302795]]}, "validation_fraction": {"dims": ["iter", "suggestion"], "attrs": {}, "data": [[0.7562927162372997], [0.4522319610224417], [0.45847833327698573], [0.4479031116543108], [0.2450517580144251], [0.717306936352956], [0.33430222521255715], [0.4159369506892012], [0.6048102305882204], [0.8336490527083656], [0.4177072645862636], [0.28267034631915405], [0.7854372131171541], [0.20877952080218878], [0.7870824383784771], [0.6812980731703515], [0.8312151935870926], [0.8303131737148256], [0.38315953395197766], [0.4173264750744295]]}}}}
