# Supplementary material
Source: ML conference proceedings conference paper supplement (https://proceedings.neurips.cc/paper_files/paper/2022/hash/31a57804448363bcab777f818f75f5b4-Abstract.html)
Supplement: Supplementary file 1 [file 31a57804448363bcab777f818f75f5b4-Supplemental-Conference.zip › trading_off_resource_budgets_f-Supplementary Material/code_and_data/experiments/base_results/bo_20220228_124924_b7rkpeqg/suggest_log/0428cecbc4e854c3b0bfcbcd7e687f13.json]

{"meta": {"args": {"--uuid": "0428cecbc4e854c3b0bfcbcd7e687f13", "-db-root": "/home/damon_falck/blackboxbandits/experiments/saved_results", "--opt-root": "/home/damon_falck/blackboxbandits/experiments", "--data-root": "/home/damon_falck/blackboxbandits/experiments/penn_datasets", "--db": "bo_20220228_124924_b7rkpeqg", "--opt": "Scikit-GP-LCB", "--data": "reg-557-analcatdata-apnea1", "--classifier": "MLP-adam", "--metric": "mse", "--calls": 20, "--suggestions": 1, "--jobs-file": null, "--verbose": false, "dry_run": false, "rev": "bd14afd", "opt_rev": "0.9.0"}, "signature": [[{"alpha": 0.019628224813442792, "batch_size": 182, "beta_1": 0.9410202200271762, "beta_2": 0.9998021557676793, "epsilon": 1.8662266976518e-08, "hidden_layer_sizes": 147, "learning_rate_init": 0.0005627932047415167, "tol": 0.03690557729213761, "validation_fraction": 0.8846827852548593}, {"alpha": 0.001998246739232944, "batch_size": 200, "beta_1": 0.919111482530466, "beta_2": 0.9998488260436156, "epsilon": 5.981221901152555e-07, "hidden_layer_sizes": 61, "learning_rate_init": 2.2310905607443014e-05, "tol": 1.2046852412030316e-05, "validation_fraction": 0.8117896445826539}, {"alpha": 0.46659545670218433, "batch_size": 219, "beta_1": 0.9889789783750891, "beta_2": 0.9999896868093284, "epsilon": 2.4234724484675948e-08, "hidden_layer_sizes": 167, "learning_rate_init": 2.972334644335654e-05, "tol": 0.0036281404040243792, "validation_fraction": 0.17260651658522078}, {"alpha": 4.656005689076002, "batch_size": 135, "beta_1": 0.870503881627747, "beta_2": 0.9948873266941017, "epsilon": 2.1023308743480125e-07, "hidden_layer_sizes": 118, "learning_rate_init": 0.001878173875716191, "tol": 1.1889379831773006e-05, "validation_fraction": 0.6264327093752792}, {"alpha": 0.04705159350400542, "batch_size": 158, "beta_1": 0.9870884262730957, "beta_2": 0.9999596874382349, "epsilon": 1.1981845126013875e-08, "hidden_layer_sizes": 116, "learning_rate_init": 0.006173405204074311, "tol": 1.7414134181586194e-05, "validation_fraction": 0.6754299026638921}], [23.4337908389275, 23.525031581837872, 24.012983940547322, 20.999229595045296, 22.35509902457064]]},
"data": {"coords": {"iter": {"dims": ["iter"], "attrs": {}, "data": [0, 1, 2, 3, 4, 5, 6, 7, 8, 9, 10, 11, 12, 13, 14, 15, 16, 17, 18, 19]}, "suggestion": {"dims": ["suggestion"], "attrs": {}, "data": [0]}}, "attrs": {}, "dims": {"iter": 20, "suggestion": 1}, "data_vars": {"alpha": {"dims": ["iter", "suggestion"], "attrs": {}, "data": [[0.001868587245980487], [2.3578616457077944e-05], [6.5849299754614705], [0.004456218414967934], [0.09531304111057758], [1e-05], [1e-05], [10.0], [0.31023721614585553], [0.6701711456834087], [0.22829326591554666], [9.071647276738693e-05], [1.1519645143639641e-05], [0.28794642743236903], [0.9225485853585615], [0.015961160194829054], [10.0], [2.934340481635468], [4.002230919679505], [2.222389767414023e-05]]}, "batch_size": {"dims": ["iter", "suggestion"], "attrs": {}, "data": [[97], [214], [101], [172], [192], [10], [10], [242], [236], [250], [250], [10], [10], [92], [250], [199], [10], [241], [250], [250]]}, "beta_1": {"dims": ["iter", "suggestion"], "attrs": {}, "data": [[0.7704446473915822], [0.9169643002508872], [0.7452844007951582], [0.5436186472244303], [0.6876846152292674], [0.99], [0.5], [0.7389593793965741], [0.8346647149128866], [0.9844546774071138], [0.7197131041697075], [0.5765464503227533], [0.99], [0.5], [0.99], [0.5150065027880262], [0.6567113610312587], [0.6941540032954145], [0.9786521371300069], [0.8782390317223973]]}, "beta_2": {"dims": ["iter", "suggestion"], "attrs": {}, "data": [[0.9165687606320886], [0.9481189775454322], [0.9262352986689782], [0.9766806765651809], [0.9351636550133711], [0.999999], [0.999999], [0.9199809837713441], [0.9701899951419285], [0.9891751886170184], [0.9247417293627286], [0.9663819481656628], [0.999999], [0.9794564357425402], [0.9288842234642973], [0.999999], [0.9835781854858571], [0.9681002750965592], [0.9721061872647905], [0.999999]]}, "epsilon": {"dims": ["iter", "suggestion"], "attrs": {}, "data": [[3.2734660187364e-07], [1.0566579037533295e-08], [4.86362527083316e-09], [4.9878071303308e-07], [4.815362907179206e-07], [1e-09], [1e-09], [1e-06], [5.552080586599457e-09], [8.962147321697262e-07], [1e-09], [1.588346904992963e-08], [1e-09], [1e-09], [6.462846349175087e-08], [5.0607637427192443e-08], [1e-09], [9.915683228826765e-07], [9.791883617497155e-08], [1e-09]]}, "hidden_layer_sizes": {"dims": ["iter", "suggestion"], "attrs": {}, "data": [[91], [100], [187], [171], [198], [50], [50], [200], [185], [186], [60], [177], [200], [187], [177], [200], [64], [200], [166], [200]]}, "learning_rate_init": {"dims": ["iter", "suggestion"], "attrs": {}, "data": [[0.0012581170832410683], [0.00017007857741412196], [0.00036959399430602606], [4.8624149125484646e-05], [0.08538367021998383], [0.1], [0.1], [0.1], [0.1], [0.1], [0.1], [0.1], [0.1], [0.03149004441239185], [0.1], [0.04258312899511901], [0.1], [0.1], [0.06285930578439643], [0.1]]}, "tol": {"dims": ["iter", "suggestion"], "attrs": {}, "data": [[0.0008958751522015599], [3.5091089814993516e-05], [1.295629033930824e-05], [5.113725940017776e-05], [3.291978926326929e-05], [0.1], [1e-05], [0.0064217265806316435], [2.698430762559403e-05], [1.003567753846188e-05], [1e-05], [1e-05], [5.510376818575931e-05], [1.2522840191992309e-05], [1.2938498081910725e-05], [0.0015534693915219904], [5.03186484984206e-05], [2.9867981660105133e-05], [0.00020561666463494635], [0.00232282351834435]]}, "validation_fraction": {"dims": ["iter", "suggestion"], "attrs": {}, "data": [[0.500267050761044], [0.244453390996787], [0.764696260704916], [0.20335329915709133], [0.30299218682337425], [0.1], [0.9], [0.1], [0.323389884379699], [0.4288814483279978], [0.13180999988824554], [0.36500814074294324], [0.5671145173971253], [0.10632538034719692], [0.16287029811081782], [0.27997265007320815], [0.4112163016743302], [0.7527937738957567], [0.41718326978768094], [0.29125418236444756]]}}}}
