# Supplementary material
Source: ML conference proceedings conference paper supplement (https://proceedings.neurips.cc/paper_files/paper/2022/hash/31a57804448363bcab777f818f75f5b4-Abstract.html)
Supplement: Supplementary file 1 [file 31a57804448363bcab777f818f75f5b4-Supplemental-Conference.zip › trading_off_resource_budgets_f-Supplementary Material/code_and_data/experiments/base_results/bo_20220228_124924_b7rkpeqg/suggest_log/0429ed15adda5655899b1ab4d5d7b9d6.json]

{"meta": {"args": {"--uuid": "0429ed15adda5655899b1ab4d5d7b9d6", "-db-root": "/home/damon_falck/blackboxbandits/experiments/saved_results", "--opt-root": "/home/damon_falck/blackboxbandits/experiments", "--data-root": "/home/damon_falck/blackboxbandits/experiments/penn_datasets", "--db": "bo_20220228_124924_b7rkpeqg", "--opt": "HyperOpt", "--data": "reg-647-fri-c1-250-10", "--classifier": "MLP-adam", "--metric": "mse", "--calls": 20, "--suggestions": 1, "--jobs-file": null, "--verbose": false, "dry_run": false, "rev": "bd14afd", "opt_rev": "0.2.7"}, "signature": [[{"alpha": 0.019628224813442792, "batch_size": 182, "beta_1": 0.9410202200271762, "beta_2": 0.9998021557676793, "epsilon": 1.8662266976518e-08, "hidden_layer_sizes": 147, "learning_rate_init": 0.0005627932047415167, "tol": 0.03690557729213761, "validation_fraction": 0.8846827852548593}, {"alpha": 0.001998246739232944, "batch_size": 200, "beta_1": 0.919111482530466, "beta_2": 0.9998488260436156, "epsilon": 5.981221901152555e-07, "hidden_layer_sizes": 61, "learning_rate_init": 2.2310905607443014e-05, "tol": 1.2046852412030316e-05, "validation_fraction": 0.8117896445826539}, {"alpha": 0.46659545670218433, "batch_size": 219, "beta_1": 0.9889789783750891, "beta_2": 0.9999896868093284, "epsilon": 2.4234724484675948e-08, "hidden_layer_sizes": 167, "learning_rate_init": 2.972334644335654e-05, "tol": 0.0036281404040243792, "validation_fraction": 0.17260651658522078}, {"alpha": 4.656005689076002, "batch_size": 135, "beta_1": 0.870503881627747, "beta_2": 0.9948873266941017, "epsilon": 2.1023308743480125e-07, "hidden_layer_sizes": 118, "learning_rate_init": 0.001878173875716191, "tol": 1.1889379831773006e-05, "validation_fraction": 0.6264327093752792}, {"alpha": 0.04705159350400542, "batch_size": 158, "beta_1": 0.9870884262730957, "beta_2": 0.9999596874382349, "epsilon": 1.1981845126013875e-08, "hidden_layer_sizes": 116, "learning_rate_init": 0.006173405204074311, "tol": 1.7414134181586194e-05, "validation_fraction": 0.6754299026638921}], [1.0336612259357278, 1.1316716327260865, 1.2985394922563684, 0.9296595454847658, 0.8754818588254487]]},
"data": {"coords": {"iter": {"dims": ["iter"], "attrs": {}, "data": [0, 1, 2, 3, 4, 5, 6, 7, 8, 9, 10, 11, 12, 13, 14, 15, 16, 17, 18, 19]}, "suggestion": {"dims": ["suggestion"], "attrs": {}, "data": [0]}}, "attrs": {}, "dims": {"iter": 20, "suggestion": 1}, "data_vars": {"alpha": {"dims": ["iter", "suggestion"], "attrs": {}, "data": [[2.302331841698178], [0.002597631071506741], [2.6444371151124614e-05], [0.000862616198242953], [4.8070293617929645], [1.3169054428586625e-05], [5.2944265746928545e-05], [9.842888710752563], [0.02261449587818206], [0.0727992478849258], [1.657512947490591e-05], [1.4753829493306252], [1.0929217797694597], [0.00017629092930548576], [0.001278555098357888], [0.0020559919776265852], [0.5831630928257215], [0.00015567119543568578], [1.3000715175201398e-05], [1.827648309260967]]}, "batch_size": {"dims": ["iter", "suggestion"], "attrs": {}, "data": [[30], [12], [226], [68], [245], [241], [247], [106], [47], [41], [123], [145], [37], [16], [168], [149], [250], [98], [80], [34]]}, "beta_1": {"dims": ["iter", "suggestion"], "attrs": {}, "data": [[0.6169683286642863], [0.9302501319389692], [0.7863244511862307], [0.682732924615317], [0.6104431088781332], [0.5382679402806592], [0.8716478886867797], [0.6265103367567095], [0.9457741530918601], [0.7159320249179142], [0.5674616612515977], [0.6182164474322733], [0.6364299270127945], [0.5459600453791856], [0.8239023467998065], [0.8016635579295759], [0.5396499824632586], [0.5022376366286367], [0.5554815122654525], [0.5271947552069213]]}, "beta_2": {"dims": ["iter", "suggestion"], "attrs": {}, "data": [[0.9169232770325084], [0.9743495773769342], [0.9777257054648729], [0.9679416759937306], [0.994366339372774], [0.9791117609118322], [0.9720673066366837], [0.9598606542872223], [0.9906362314425213], [0.9045179118935323], [0.980784246027463], [0.9445259815989789], [0.9546227219520833], [0.9949728683114722], [0.9869430320346175], [0.9630066422289811], [0.9476862371584132], [0.9011638668672891], [0.9453188517910156], [0.9360158547116578]]}, "epsilon": {"dims": ["iter", "suggestion"], "attrs": {}, "data": [[1.0413209518762024e-07], [1.0181182030865366e-09], [4.105877798477017e-07], [1.901166465328407e-07], [3.0307314235221347e-09], [1.8165935421164806e-07], [6.484134889785999e-08], [1.9063025972251655e-09], [4.957768708501455e-09], [1.247334397284441e-07], [5.555086943832741e-08], [3.4708010606324887e-07], [1.8466954979487732e-07], [8.715599927100243e-07], [1.66985902983141e-09], [1.9769832000391234e-08], [3.173578463470294e-08], [7.389278475183888e-09], [4.476750181021475e-08], [6.018311319140632e-07]]}, "hidden_layer_sizes": {"dims": ["iter", "suggestion"], "attrs": {}, "data": [[89], [61], [131], [140], [127], [158], [61], [178], [155], [192], [169], [51], [65], [160], [196], [58], [107], [190], [102], [148]]}, "learning_rate_init": {"dims": ["iter", "suggestion"], "attrs": {}, "data": [[5.0844084120115736e-05], [0.008979633744038411], [0.00018281589847022041], [0.00010154870204836329], [0.059126486396928433], [0.013306016631595802], [1.6102603050307806e-05], [1.1144509071715033e-05], [0.0005089216034117257], [0.00225156366129028], [8.219129762229821e-05], [1.3901206661455447e-05], [0.09779653711198126], [0.001245634116159646], [0.025786872368371894], [0.0005811128954389523], [1.4775279990116231e-05], [0.004271962591333816], [0.00023340009340367844], [0.006643738669740559]]}, "tol": {"dims": ["iter", "suggestion"], "attrs": {}, "data": [[0.05864917755877921], [0.04782709423819773], [0.0006656973551478707], [0.028572209810731847], [0.07450964418969717], [0.08943316575248161], [1.052636386969698e-05], [2.6936549106993407e-05], [0.003961667339962725], [0.0019336852303786217], [0.0006229531595997967], [0.0010681459056986397], [0.06566954707849491], [0.03354344223997583], [0.00013598852994471466], [0.0005064956590023198], [1.9100078424036593e-05], [3.0320045785779035e-05], [0.007194272994706257], [0.04209374632153559]]}, "validation_fraction": {"dims": ["iter", "suggestion"], "attrs": {}, "data": [[0.3216820123917415], [0.21752848186118864], [0.10215835066365761], [0.5752642324091645], [0.48868606055781516], [0.5541832590677376], [0.40643365808455434], [0.21672389334029385], [0.1105321344121779], [0.10682152970004904], [0.1247422068642236], [0.13545231290626983], [0.3158902358937818], [0.29797178387800377], [0.22829329858410466], [0.3740423704721465], [0.12665302005713477], [0.2828815952184519], [0.2765444785059526], [0.2024574181601728]]}}}}
