# Supplementary material
Source: ML conference proceedings conference paper supplement (https://proceedings.neurips.cc/paper_files/paper/2022/hash/31a57804448363bcab777f818f75f5b4-Abstract.html)
Supplement: Supplementary file 1 [file 31a57804448363bcab777f818f75f5b4-Supplemental-Conference.zip › trading_off_resource_budgets_f-Supplementary Material/code_and_data/experiments/base_results/bo_20220228_124924_b7rkpeqg/suggest_log/0509f778a8965a19b3427cdb34805b1c.json]

{"meta": {"args": {"--uuid": "0509f778a8965a19b3427cdb34805b1c", "-db-root": "/home/damon_falck/blackboxbandits/experiments/saved_results", "--opt-root": "/home/damon_falck/blackboxbandits/experiments", "--data-root": "/home/damon_falck/blackboxbandits/experiments/penn_datasets", "--db": "bo_20220228_124924_b7rkpeqg", "--opt": "OpenTuner-GA-DE", "--data": "reg-228-elusage", "--classifier": "MLP-adam", "--metric": "mse", "--calls": 20, "--suggestions": 1, "--jobs-file": null, "--verbose": false, "dry_run": false, "rev": "bd14afd", "opt_rev": "0.8.7"}, "signature": [[{"alpha": 0.019628224813442792, "batch_size": 182, "beta_1": 0.9410202200271762, "beta_2": 0.9998021557676793, "epsilon": 1.8662266976518e-08, "hidden_layer_sizes": 147, "learning_rate_init": 0.0005627932047415167, "tol": 0.03690557729213761, "validation_fraction": 0.8846827852548593}, {"alpha": 0.001998246739232944, "batch_size": 200, "beta_1": 0.919111482530466, "beta_2": 0.9998488260436156, "epsilon": 5.981221901152555e-07, "hidden_layer_sizes": 61, "learning_rate_init": 2.2310905607443014e-05, "tol": 1.2046852412030316e-05, "validation_fraction": 0.8117896445826539}, {"alpha": 0.46659545670218433, "batch_size": 219, "beta_1": 0.9889789783750891, "beta_2": 0.9999896868093284, "epsilon": 2.4234724484675948e-08, "hidden_layer_sizes": 167, "learning_rate_init": 2.972334644335654e-05, "tol": 0.0036281404040243792, "validation_fraction": 0.17260651658522078}, {"alpha": 4.656005689076002, "batch_size": 135, "beta_1": 0.870503881627747, "beta_2": 0.9948873266941017, "epsilon": 2.1023308743480125e-07, "hidden_layer_sizes": 118, "learning_rate_init": 0.001878173875716191, "tol": 1.1889379831773006e-05, "validation_fraction": 0.6264327093752792}, {"alpha": 0.04705159350400542, "batch_size": 158, "beta_1": 0.9870884262730957, "beta_2": 0.9999596874382349, "epsilon": 1.1981845126013875e-08, "hidden_layer_sizes": 116, "learning_rate_init": 0.006173405204074311, "tol": 1.7414134181586194e-05, "validation_fraction": 0.6754299026638921}], [0.8179604199730048, 1.2781426534878488, 1.356351444238235, 0.609169839973662, 0.30510955649328]]},
"data": {"coords": {"iter": {"dims": ["iter"], "attrs": {}, "data": [0, 1, 2, 3, 4, 5, 6, 7, 8, 9, 10, 11, 12, 13, 14, 15, 16, 17, 18, 19]}, "suggestion": {"dims": ["suggestion"], "attrs": {}, "data": [0]}}, "attrs": {}, "dims": {"iter": 20, "suggestion": 1}, "data_vars": {"alpha": {"dims": ["iter", "suggestion"], "attrs": {}, "data": [[0.9259410675847922], [0.9259410675847922], [0.9259410675847922], [0.5546524799800628], [1.2945169590341248], [6.758824927034631], [0.1404856628437538], [0.9259410675847922], [0.9259410675847922], [3.7159989592701126], [0.9259410675847922], [7.422295702425753], [0.3737144437651076], [1.172452043098501], [0.25557430251639895], [0.04980398267439717], [1.2799618923619969], [1.00951798618352], [0.24067934018570653], [2.7159418203487666]]}, "batch_size": {"dims": ["iter", "suggestion"], "attrs": {}, "data": [[174], [181], [181], [181], [79], [159], [119], [181], [181], [238], [157], [156], [181], [246], [165], [205], [127], [157], [208], [73]]}, "beta_1": {"dims": ["iter", "suggestion"], "attrs": {}, "data": [[0.7361493657063856], [0.7361493657063856], [0.7361493657063856], [0.7361493657063856], [0.6456377991329142], [0.5919880984807986], [0.8513553289228575], [0.7361493657063856], [0.7361493657063856], [0.6966886173670035], [0.7361493657063856], [0.9656285126787005], [0.7361493657063856], [0.5431533874407415], [0.7361493657063856], [0.6885747433296697], [0.7445740784337541], [0.5592479555684389], [0.6888109171893486], [0.7867454713076348]]}, "beta_2": {"dims": ["iter", "suggestion"], "attrs": {}, "data": [[0.9283425030579279], [0.9283425030579279], [0.9555379527280115], [0.9283425030579279], [0.9921309165067623], [0.9553343592956648], [0.9195577716008857], [0.9179378742284688], [0.9283425030579279], [0.9711304936732387], [0.9632897859365744], [0.9257598932922867], [0.9283425030579279], [0.9225969787339579], [0.9283425030579279], [0.9011764442519598], [0.9659668094345196], [0.9154131484853775], [0.9882520890133357], [0.9262443697156169]]}, "epsilon": {"dims": ["iter", "suggestion"], "attrs": {}, "data": [[1.3653851330172506e-07], [1.3653851330172506e-07], [1.3653851330172506e-07], [1.3653851330172506e-07], [8.54720842020067e-07], [8.3065289230826e-08], [7.96596200253712e-07], [1.3653851330172506e-07], [1.3653851330172506e-07], [7.456305161362687e-07], [1.3653851330172506e-07], [6.975006995596212e-07], [8.805655390692047e-07], [4.2725939000728865e-07], [1.3653851330172506e-07], [2.1849812617599673e-07], [7.248571517742542e-07], [5.35668295859575e-07], [7.842632531457051e-07], [3.680284443035854e-07]]}, "hidden_layer_sizes": {"dims": ["iter", "suggestion"], "attrs": {}, "data": [[169], [169], [169], [169], [96], [147], [195], [169], [169], [158], [124], [136], [169], [122], [169], [69], [160], [164], [178], [59]]}, "learning_rate_init": {"dims": ["iter", "suggestion"], "attrs": {}, "data": [[0.06145370633104313], [0.06145370633104313], [0.06145370633104313], [0.06145370633104313], [0.048064707201933725], [0.035214741046235724], [0.05690146920321986], [0.06145370633104313], [0.0386883844774441], [0.01611142663038383], [0.06145370633104313], [0.017033805478436182], [0.06145370633104313], [0.08640269927481385], [0.06145370633104313], [0.028678401549819755], [0.0913597325027146], [0.09223436367121633], [0.05789266242533613], [0.002088310515929438]]}, "tol": {"dims": ["iter", "suggestion"], "attrs": {}, "data": [[0.03906197772833558], [0.03906197772833558], [0.03906197772833558], [0.03906197772833558], [0.09006063567747773], [0.04179019780288134], [0.0828153744573518], [0.03906197772833558], [0.03906197772833558], [0.036946763973987266], [0.03906197772833558], [0.05310059068714395], [0.03906197772833558], [0.07479922897066975], [0.03906197772833558], [0.0027838430097219436], [0.08420508056038549], [0.07788266002666926], [0.05260579764878342], [0.002015870138841237]]}, "validation_fraction": {"dims": ["iter", "suggestion"], "attrs": {}, "data": [[0.5415234400631637], [0.5415234400631637], [0.5415234400631637], [0.5415234400631637], [0.34320787880356624], [0.6705262140766833], [0.6285205227763537], [0.5415234400631637], [0.5415234400631637], [0.898478522688126], [0.571449989422536], [0.38391894418289274], [0.5415234400631637], [0.1005077565233151], [0.5415234400631637], [0.6032252395953082], [0.8653553672053843], [0.8080456369333775], [0.4537289206590235], [0.1547812276523124]]}}}}
