# Supplementary material
Source: ML conference proceedings conference paper supplement (https://proceedings.neurips.cc/paper_files/paper/2022/hash/31a57804448363bcab777f818f75f5b4-Abstract.html)
Supplement: Supplementary file 1 [file 31a57804448363bcab777f818f75f5b4-Supplemental-Conference.zip › trading_off_resource_budgets_f-Supplementary Material/code_and_data/experiments/base_results/bo_20220228_124924_b7rkpeqg/suggest_log/0540a5714d555c24b4db271d34b54935.json]

{"meta": {"args": {"--uuid": "0540a5714d555c24b4db271d34b54935", "-db-root": "/home/damon_falck/blackboxbandits/experiments/saved_results", "--opt-root": "/home/damon_falck/blackboxbandits/experiments", "--data-root": "/home/damon_falck/blackboxbandits/experiments/penn_datasets", "--db": "bo_20220228_124924_b7rkpeqg", "--opt": "OpenTuner-GA", "--data": "reg-1028-SWD", "--classifier": "lasso", "--metric": "mse", "--calls": 20, "--suggestions": 1, "--jobs-file": null, "--verbose": false, "dry_run": false, "rev": "bd14afd", "opt_rev": "0.8.7"}, "signature": [[{"alpha": 1.5676677195506077, "fit_intercept": true, "max_iter": 423, "normalize": true, "positive": false, "tol": 0.0038333321561566623}, {"alpha": 0.5627932047415171, "fit_intercept": true, "max_iter": 3989, "normalize": false, "positive": true, "tol": 0.001304907355036239}, {"alpha": 1.871450068624068, "fit_intercept": true, "max_iter": 16, "normalize": false, "positive": false, "tol": 0.021403233140986057}, {"alpha": 12.960656597279737, "fit_intercept": true, "max_iter": 4378, "normalize": true, "positive": false, "tol": 0.013246974647468445}, {"alpha": 0.029723346443356558, "fit_intercept": true, "max_iter": 24, "normalize": true, "positive": true, "tol": 0.00045566719139214756}], [1.463624712275075, 1.3925566357660946, 1.463624712275075, 1.463624712275075, 1.463624712275075]]},
"data": {"coords": {"iter": {"dims": ["iter"], "attrs": {}, "data": [0, 1, 2, 3, 4, 5, 6, 7, 8, 9, 10, 11, 12, 13, 14, 15, 16, 17, 18, 19]}, "suggestion": {"dims": ["suggestion"], "attrs": {}, "data": [0]}}, "attrs": {}, "dims": {"iter": 20, "suggestion": 1}, "data_vars": {"alpha": {"dims": ["iter", "suggestion"], "attrs": {}, "data": [[5.097917209134324], [5.062845999736204], [5.097917209134324], [62.16153988183105], [1.1223702326717284], [13.703536029495469], [5.097917209134324], [5.097917209134324], [5.097917209134324], [5.097917209134324], [1.7804979654730066], [1.7804979654730066], [1.7804979654730066], [5.097917209134324], [8.790960613289815], [5.933633134510909], [4.871330029061134], [14.06397289070729], [25.394277592816987], [11.410471822132129]]}, "fit_intercept": {"dims": ["iter", "suggestion"], "attrs": {}, "data": [[1], [1], [1], [0], [0], [0], [1], [1], [0], [1], [0], [0], [0], [1], [1], [1], [1], [1], [0], [1]]}, "max_iter": {"dims": ["iter", "suggestion"], "attrs": {}, "data": [[3157], [109], [20], [161], [223], [2048], [3157], [3157], [3157], [3157], [291], [291], [291], [2728], [3157], [65], [3157], [3157], [15], [3157]]}, "normalize": {"dims": ["iter", "suggestion"], "attrs": {}, "data": [[0], [0], [0], [1], [1], [1], [1], [0], [0], [0], [0], [0], [0], [0], [0], [0], [0], [0], [0], [0]]}, "positive": {"dims": ["iter", "suggestion"], "attrs": {}, "data": [[1], [0], [1], [1], [1], [1], [1], [1], [1], [1], [0], [0], [0], [1], [1], [0], [1], [1], [0], [1]]}, "tol": {"dims": ["iter", "suggestion"], "attrs": {}, "data": [[0.05808091300227652], [0.04147187815624614], [0.05808091300227652], [0.006698357491555496], [0.07706157860826106], [0.01788208453293365], [0.05808091300227652], [0.07797677596522916], [0.05808091300227652], [0.03694055718492966], [0.06817169817333683], [0.06817169817333683], [0.06817169817333683], [0.05808091300227652], [0.05808091300227652], [0.012860751113096636], [0.05808091300227652], [0.05808091300227652], [0.08835036279065471], [0.05808091300227652]]}}}}
