# Supplementary material
Source: ML conference proceedings conference paper supplement (https://proceedings.neurips.cc/paper_files/paper/2022/hash/31a57804448363bcab777f818f75f5b4-Abstract.html)
Supplement: Supplementary file 1 [file 31a57804448363bcab777f818f75f5b4-Supplemental-Conference.zip › trading_off_resource_budgets_f-Supplementary Material/code_and_data/experiments/base_results/bo_20220228_124924_b7rkpeqg/suggest_log/0560ef5391f55d59b343daee5f28a0dc.json]

{"meta": {"args": {"--uuid": "0560ef5391f55d59b343daee5f28a0dc", "-db-root": "/home/damon_falck/blackboxbandits/experiments/saved_results", "--opt-root": "/home/damon_falck/blackboxbandits/experiments", "--data-root": "/home/damon_falck/blackboxbandits/experiments/penn_datasets", "--db": "bo_20220228_124924_b7rkpeqg", "--opt": "OpenTuner-GA-DE", "--data": "reg-650-fri-c0-500-50", "--classifier": "lasso", "--metric": "mse", "--calls": 20, "--suggestions": 1, "--jobs-file": null, "--verbose": false, "dry_run": false, "rev": "bd14afd", "opt_rev": "0.8.7"}, "signature": [[{"alpha": 1.5676677195506077, "fit_intercept": true, "max_iter": 423, "normalize": true, "positive": false, "tol": 0.0038333321561566623}, {"alpha": 0.5627932047415171, "fit_intercept": true, "max_iter": 3989, "normalize": false, "positive": true, "tol": 0.001304907355036239}, {"alpha": 1.871450068624068, "fit_intercept": true, "max_iter": 16, "normalize": false, "positive": false, "tol": 0.021403233140986057}, {"alpha": 12.960656597279737, "fit_intercept": true, "max_iter": 4378, "normalize": true, "positive": false, "tol": 0.013246974647468445}, {"alpha": 0.029723346443356558, "fit_intercept": true, "max_iter": 24, "normalize": true, "positive": true, "tol": 0.00045566719139214756}], [0.922283381525258, 0.8908404909549972, 0.922283381525258, 0.922283381525258, 0.8613402893551809]]},
"data": {"coords": {"iter": {"dims": ["iter"], "attrs": {}, "data": [0, 1, 2, 3, 4, 5, 6, 7, 8, 9, 10, 11, 12, 13, 14, 15, 16, 17, 18, 19]}, "suggestion": {"dims": ["suggestion"], "attrs": {}, "data": [0]}}, "attrs": {}, "dims": {"iter": 20, "suggestion": 1}, "data_vars": {"alpha": {"dims": ["iter", "suggestion"], "attrs": {}, "data": [[9.927706381100219], [68.31026645939536], [2.6333260874153153], [68.31026645939536], [16.680855934309545], [68.31026645939536], [3.798200451237274], [3.5843724529168197], [68.31026645939536], [86.06014272605827], [10.908535268769125], [2.3604367380323166], [68.31026645939536], [0.18508289686765722], [21.61879272606994], [2.4152937834282295], [4.4408384944276325], [72.85996374482049], [10.024069629052551], [0.18508289686765722]]}, "fit_intercept": {"dims": ["iter", "suggestion"], "attrs": {}, "data": [[1], [0], [0], [0], [0], [0], [1], [0], [0], [0], [0], [1], [0], [0], [0], [0], [0], [1], [0], [0]]}, "max_iter": {"dims": ["iter", "suggestion"], "attrs": {}, "data": [[23], [23], [23], [26], [11], [216], [893], [36], [23], [1714], [23], [1059], [22], [1032], [287], [10], [1026], [57], [490], [3395]]}, "normalize": {"dims": ["iter", "suggestion"], "attrs": {}, "data": [[1], [1], [1], [1], [0], [1], [0], [1], [1], [0], [1], [1], [1], [1], [1], [0], [0], [0], [0], [1]]}, "positive": {"dims": ["iter", "suggestion"], "attrs": {}, "data": [[0], [0], [0], [0], [0], [0], [1], [0], [0], [1], [0], [0], [0], [0], [1], [1], [0], [1], [1], [0]]}, "tol": {"dims": ["iter", "suggestion"], "attrs": {}, "data": [[0.028543598301647922], [0.028543598301647922], [0.028543598301647922], [0.028543598301647922], [0.09481520796381752], [0.028543598301647922], [0.06262478575437662], [0.09942360797753295], [0.09371438387495006], [0.0034831903395348596], [0.028543598301647922], [0.01581592490428634], [0.028543598301647922], [0.05805378810898237], [0.05765899122884826], [0.0227435422875361], [0.05437528226118509], [0.039484550076423534], [0.008481315225127007], [0.005145026677346665]]}}}}
