# Supplementary material
Source: ML conference proceedings conference paper supplement (https://proceedings.neurips.cc/paper_files/paper/2022/hash/31a57804448363bcab777f818f75f5b4-Abstract.html)
Supplement: Supplementary file 1 [file 31a57804448363bcab777f818f75f5b4-Supplemental-Conference.zip › trading_off_resource_budgets_f-Supplementary Material/code_and_data/experiments/base_results/bo_20220228_124924_b7rkpeqg/suggest_log/0609f266cea05aea88b0ef159643edf2.json]

{"meta": {"args": {"--uuid": "0609f266cea05aea88b0ef159643edf2", "-db-root": "/home/damon_falck/blackboxbandits/experiments/saved_results", "--opt-root": "/home/damon_falck/blackboxbandits/experiments", "--data-root": "/home/damon_falck/blackboxbandits/experiments/penn_datasets", "--db": "bo_20220228_124924_b7rkpeqg", "--opt": "Scikit-GBRT-Hedge", "--data": "clf-waveform-21", "--classifier": "MLP-adam", "--metric": "nll", "--calls": 20, "--suggestions": 1, "--jobs-file": null, "--verbose": false, "dry_run": false, "rev": "bd14afd", "opt_rev": "0.9.0"}, "signature": [[{"alpha": 0.019628224813442792, "batch_size": 182, "beta_1": 0.9410202200271762, "beta_2": 0.9998021557676793, "epsilon": 1.8662266976518e-08, "hidden_layer_sizes": 147, "learning_rate_init": 0.0005627932047415167, "tol": 0.03690557729213761, "validation_fraction": 0.8846827852548593}, {"alpha": 0.001998246739232944, "batch_size": 200, "beta_1": 0.919111482530466, "beta_2": 0.9998488260436156, "epsilon": 5.981221901152555e-07, "hidden_layer_sizes": 61, "learning_rate_init": 2.2310905607443014e-05, "tol": 1.2046852412030316e-05, "validation_fraction": 0.8117896445826539}, {"alpha": 0.46659545670218433, "batch_size": 219, "beta_1": 0.9889789783750891, "beta_2": 0.9999896868093284, "epsilon": 2.4234724484675948e-08, "hidden_layer_sizes": 167, "learning_rate_init": 2.972334644335654e-05, "tol": 0.0036281404040243792, "validation_fraction": 0.17260651658522078}, {"alpha": 4.656005689076002, "batch_size": 135, "beta_1": 0.870503881627747, "beta_2": 0.9948873266941017, "epsilon": 2.1023308743480125e-07, "hidden_layer_sizes": 118, "learning_rate_init": 0.001878173875716191, "tol": 1.1889379831773006e-05, "validation_fraction": 0.6264327093752792}, {"alpha": 0.04705159350400542, "batch_size": 158, "beta_1": 0.9870884262730957, "beta_2": 0.9999596874382349, "epsilon": 1.1981845126013875e-08, "hidden_layer_sizes": 116, "learning_rate_init": 0.006173405204074311, "tol": 1.7414134181586194e-05, "validation_fraction": 0.6754299026638921}], [0.6295258842930568, 0.9750609451301061, 0.5553357556428726, 0.3461010388918074, 0.3582994384578376]]},
"data": {"coords": {"iter": {"dims": ["iter"], "attrs": {}, "data": [0, 1, 2, 3, 4, 5, 6, 7, 8, 9, 10, 11, 12, 13, 14, 15, 16, 17, 18, 19]}, "suggestion": {"dims": ["suggestion"], "attrs": {}, "data": [0]}}, "attrs": {}, "dims": {"iter": 20, "suggestion": 1}, "data_vars": {"alpha": {"dims": ["iter", "suggestion"], "attrs": {}, "data": [[0.002537423127099499], [0.004950688454824658], [0.4190021707932163], [0.31357301933828335], [0.00010794629113326124], [0.9335222668111434], [0.2974179465623226], [0.37062578252790623], [9.18667965083323], [6.2241058866932], [0.00017787501723011116], [7.930216884762753], [0.00017180616928253963], [8.954324960871425], [0.010204698437409326], [0.00034218074874250455], [0.009627246688367945], [9.569411312185757e-05], [6.215325852934931e-05], [4.216989284198576e-05]]}, "batch_size": {"dims": ["iter", "suggestion"], "attrs": {}, "data": [[223], [214], [24], [75], [247], [22], [43], [26], [166], [103], [32], [11], [11], [249], [165], [16], [80], [151], [166], [43]]}, "beta_1": {"dims": ["iter", "suggestion"], "attrs": {}, "data": [[0.6617672963182195], [0.6810324584308197], [0.5450595240450942], [0.75874029561202], [0.6082709528746028], [0.5681153487599798], [0.5235184481286025], [0.5367200922641956], [0.548213065752738], [0.7113151798884197], [0.5888224727238612], [0.5489102753707468], [0.7058280819610799], [0.7529939581661058], [0.897110958312073], [0.936354524684128], [0.5147792494419073], [0.5484052666687855], [0.5817219590517471], [0.8810489022395871]]}, "beta_2": {"dims": ["iter", "suggestion"], "attrs": {}, "data": [[0.9581713452799326], [0.947963123402823], [0.9488484391005608], [0.9328758400229427], [0.9603757798606662], [0.9175665946808578], [0.9724519195615104], [0.9602881715529026], [0.9078326738784608], [0.909003034428783], [0.9082058030278641], [0.9063320976087782], [0.9051048017577545], [0.9684075821658362], [0.9958026881157565], [0.9030467932569637], [0.9545687617051888], [0.9096323191889121], [0.9236684698457164], [0.9620525483249047]]}, "epsilon": {"dims": ["iter", "suggestion"], "attrs": {}, "data": [[2.3135409692833082e-07], [1.784170285139668e-08], [1.0668187241687186e-08], [1.1690971017493041e-09], [2.9149122483010517e-07], [1.7743669577510027e-09], [7.244159959073781e-07], [4.363068009326522e-08], [9.486636806678101e-08], [3.567561285451001e-08], [1.2906219777910394e-08], [2.7549138375573345e-08], [2.0506473966460326e-09], [8.649486064100444e-07], [5.906502304731234e-07], [3.998185620533924e-09], [7.998544859945388e-09], [1.4694272280602846e-08], [2.2311341818820315e-08], [1.744116083194623e-09]]}, "hidden_layer_sizes": {"dims": ["iter", "suggestion"], "attrs": {}, "data": [[116], [115], [120], [147], [179], [128], [136], [108], [86], [81], [148], [174], [82], [111], [176], [63], [185], [179], [187], [104]]}, "learning_rate_init": {"dims": ["iter", "suggestion"], "attrs": {}, "data": [[0.02183033007715541], [0.00013883868941491257], [0.0027183996947179024], [8.950423469658586e-05], [0.04590003999715326], [0.0018927332817544674], [2.191890399392052e-05], [0.0027628149032716443], [6.885070883873573e-05], [0.004313894095220387], [0.0027579303823365106], [0.06889717412554643], [0.002102434197657124], [0.061731602161795365], [0.09837138866020971], [0.09648506419814606], [0.09653399144136322], [0.0016926006874562025], [1.2084335400943907e-05], [0.09784777654891814]]}, "tol": {"dims": ["iter", "suggestion"], "attrs": {}, "data": [[0.0748043654238048], [0.0001961997187557035], [0.03572801978788502], [0.08850873180907047], [0.029794466493669992], [0.0010106812357906457], [9.326170500545138e-05], [0.021896038205186305], [0.0022312349857306875], [0.01402460996046818], [0.00011807168676190886], [0.0007523005205213761], [0.004511404297472493], [0.06688942383497058], [0.0017315664911644914], [0.001839025221943187], [0.08148202275570915], [0.08881139695041806], [9.072157414816078e-05], [0.037791328785616016]]}, "validation_fraction": {"dims": ["iter", "suggestion"], "attrs": {}, "data": [[0.7801168637468844], [0.14566915115153725], [0.5753585405948792], [0.26367648948633254], [0.646168542273442], [0.8379545851273711], [0.2192915323399151], [0.7441414052663183], [0.8629980876758908], [0.8687832062323169], [0.13115376378485213], [0.1051470314979796], [0.22520219073645012], [0.6259967552971173], [0.8802227315946132], [0.4852793237151232], [0.8373945320494633], [0.11430293347863933], [0.10445842630992119], [0.38956362596282323]]}}}}
