# Supplementary material
Source: ML conference proceedings conference paper supplement (https://proceedings.neurips.cc/paper_files/paper/2022/hash/31a57804448363bcab777f818f75f5b4-Abstract.html)
Supplement: Supplementary file 1 [file 31a57804448363bcab777f818f75f5b4-Supplemental-Conference.zip › trading_off_resource_budgets_f-Supplementary Material/code_and_data/experiments/base_results/bo_20220228_124924_b7rkpeqg/suggest_log/0767b72766b653969ae9a523de2d323e.json]

{"meta": {"args": {"--uuid": "0767b72766b653969ae9a523de2d323e", "-db-root": "/home/damon_falck/blackboxbandits/experiments/saved_results", "--opt-root": "/home/damon_falck/blackboxbandits/experiments", "--data-root": "/home/damon_falck/blackboxbandits/experiments/penn_datasets", "--db": "bo_20220228_124924_b7rkpeqg", "--opt": "OpenTuner-GA", "--data": "clf-analcatdata-cyyoung8092", "--classifier": "MLP-adam", "--metric": "nll", "--calls": 20, "--suggestions": 1, "--jobs-file": null, "--verbose": false, "dry_run": false, "rev": "bd14afd", "opt_rev": "0.8.7"}, "signature": [[{"alpha": 0.019628224813442792, "batch_size": 182, "beta_1": 0.9410202200271762, "beta_2": 0.9998021557676793, "epsilon": 1.8662266976518e-08, "hidden_layer_sizes": 147, "learning_rate_init": 0.0005627932047415167, "tol": 0.03690557729213761, "validation_fraction": 0.8846827852548593}, {"alpha": 0.001998246739232944, "batch_size": 200, "beta_1": 0.919111482530466, "beta_2": 0.9998488260436156, "epsilon": 5.981221901152555e-07, "hidden_layer_sizes": 61, "learning_rate_init": 2.2310905607443014e-05, "tol": 1.2046852412030316e-05, "validation_fraction": 0.8117896445826539}, {"alpha": 0.46659545670218433, "batch_size": 219, "beta_1": 0.9889789783750891, "beta_2": 0.9999896868093284, "epsilon": 2.4234724484675948e-08, "hidden_layer_sizes": 167, "learning_rate_init": 2.972334644335654e-05, "tol": 0.0036281404040243792, "validation_fraction": 0.17260651658522078}, {"alpha": 4.656005689076002, "batch_size": 135, "beta_1": 0.870503881627747, "beta_2": 0.9948873266941017, "epsilon": 2.1023308743480125e-07, "hidden_layer_sizes": 118, "learning_rate_init": 0.001878173875716191, "tol": 1.1889379831773006e-05, "validation_fraction": 0.6264327093752792}, {"alpha": 0.04705159350400542, "batch_size": 158, "beta_1": 0.9870884262730957, "beta_2": 0.9999596874382349, "epsilon": 1.1981845126013875e-08, "hidden_layer_sizes": 116, "learning_rate_init": 0.006173405204074311, "tol": 1.7414134181586194e-05, "validation_fraction": 0.6754299026638921}], [0.5710217681897332, 0.7066657387840799, 0.650940847531165, 0.5077539347583777, 0.4784405195380613]]},
"data": {"coords": {"iter": {"dims": ["iter"], "attrs": {}, "data": [0, 1, 2, 3, 4, 5, 6, 7, 8, 9, 10, 11, 12, 13, 14, 15, 16, 17, 18, 19]}, "suggestion": {"dims": ["suggestion"], "attrs": {}, "data": [0]}}, "attrs": {}, "dims": {"iter": 20, "suggestion": 1}, "data_vars": {"alpha": {"dims": ["iter", "suggestion"], "attrs": {}, "data": [[2.711526915765251], [4.262934120300493], [4.262934120300493], [4.262934120300493], [2.0387488681677333], [4.262934120300493], [4.262934120300493], [0.035893331916213515], [4.262934120300493], [0.04626541219466567], [2.226490551215781], [4.262934120300493], [4.262934120300493], [4.262934120300493], [5.242817959541842], [4.262934120300493], [4.262934120300493], [4.262934120300493], [4.262934120300493], [4.262934120300493]]}, "batch_size": {"dims": ["iter", "suggestion"], "attrs": {}, "data": [[37], [124], [124], [124], [237], [124], [124], [140], [124], [104], [205], [124], [124], [124], [66], [124], [124], [124], [124], [124]]}, "beta_1": {"dims": ["iter", "suggestion"], "attrs": {}, "data": [[0.9356491372278359], [0.520718189701782], [0.520718189701782], [0.6094883754698585], [0.6428614030426569], [0.6094883754698585], [0.6094883754698585], [0.5601329845583688], [0.6094883754698585], [0.5518569401636937], [0.8777988154049229], [0.6647638984164193], [0.6094883754698585], [0.6094883754698585], [0.9814452001969317], [0.6094883754698585], [0.6094883754698585], [0.6094883754698585], [0.8756928853811681], [0.6094883754698585]]}, "beta_2": {"dims": ["iter", "suggestion"], "attrs": {}, "data": [[0.9085234389588672], [0.9058195076405398], [0.9058195076405398], [0.9058195076405398], [0.9016107947189522], [0.9253528762329415], [0.9058195076405398], [0.9192971624929757], [0.9748172345271476], [0.9588606249573423], [0.917841917904024], [0.9846632297376199], [0.9748172345271476], [0.9748172345271476], [0.9517340532134673], [0.9748172345271476], [0.9748172345271476], [0.9748172345271476], [0.9748172345271476], [0.9748172345271476]]}, "epsilon": {"dims": ["iter", "suggestion"], "attrs": {}, "data": [[3.4646361948883944e-07], [7.883720750950497e-07], [7.883720750950497e-07], [7.883720750950497e-07], [8.672084785004964e-07], [7.883720750950497e-07], [7.883720750950497e-07], [2.7878292555069586e-07], [7.883720750950497e-07], [1.0432131306078906e-07], [4.379981221330477e-07], [7.883720750950497e-07], [7.883720750950497e-07], [7.883720750950497e-07], [3.6274127004962033e-07], [7.883720750950497e-07], [4.626836404292002e-07], [4.626836404292002e-07], [4.626836404292002e-07], [4.626836404292002e-07]]}, "hidden_layer_sizes": {"dims": ["iter", "suggestion"], "attrs": {}, "data": [[181], [103], [103], [103], [183], [103], [103], [193], [103], [66], [139], [103], [103], [103], [66], [103], [103], [103], [103], [103]]}, "learning_rate_init": {"dims": ["iter", "suggestion"], "attrs": {}, "data": [[0.03262767159970375], [0.04396472300559167], [0.04396472300559167], [0.04396472300559167], [0.0986229789864727], [0.04396472300559167], [0.04396472300559167], [0.06705330228116162], [0.04396472300559167], [0.008810607002947824], [0.05442450341285359], [0.04396472300559167], [0.04396472300559167], [0.04396472300559167], [0.06949243904891327], [0.024464899260510476], [0.04396472300559167], [0.04396472300559167], [0.04396472300559167], [0.062253834442481386]]}, "tol": {"dims": ["iter", "suggestion"], "attrs": {}, "data": [[0.025532728954062934], [0.05826511489708668], [0.05826511489708668], [0.05826511489708668], [0.09892866510831404], [0.05826511489708668], [0.007181201338494137], [0.08541021193592073], [0.007181201338494137], [0.050952161984770976], [0.09446188488235456], [0.007181201338494137], [0.08511425876700233], [0.08397379488706751], [0.007677883221196492], [0.007181201338494137], [0.007181201338494137], [0.04592838424852202], [0.007181201338494137], [0.007181201338494137]]}, "validation_fraction": {"dims": ["iter", "suggestion"], "attrs": {}, "data": [[0.45074043207906633], [0.8814766321137283], [0.7441338197810851], [0.7441338197810851], [0.36793180265064984], [0.7441338197810851], [0.7441338197810851], [0.39659330158517403], [0.7441338197810851], [0.17171041218525201], [0.6889348729722653], [0.7441338197810851], [0.7441338197810851], [0.7441338197810851], [0.7409101810752127], [0.7441338197810851], [0.7441338197810851], [0.7441338197810851], [0.7441338197810851], [0.7441338197810851]]}}}}
