# Supplementary material
Source: ML conference proceedings conference paper supplement (https://proceedings.neurips.cc/paper_files/paper/2022/hash/31a57804448363bcab777f818f75f5b4-Abstract.html)
Supplement: Supplementary file 1 [file 31a57804448363bcab777f818f75f5b4-Supplemental-Conference.zip › trading_off_resource_budgets_f-Supplementary Material/code_and_data/experiments/base_results/bo_20220228_124924_b7rkpeqg/suggest_log/0889b1a2b43c5acb800cad242a7ab0ec.json]

{"meta": {"args": {"--uuid": "0889b1a2b43c5acb800cad242a7ab0ec", "-db-root": "/home/damon_falck/blackboxbandits/experiments/saved_results", "--opt-root": "/home/damon_falck/blackboxbandits/experiments", "--data-root": "/home/damon_falck/blackboxbandits/experiments/penn_datasets", "--db": "bo_20220228_124924_b7rkpeqg", "--opt": "OpenTuner-GA", "--data": "clf-splice", "--classifier": "MLP-adam", "--metric": "nll", "--calls": 20, "--suggestions": 1, "--jobs-file": null, "--verbose": false, "dry_run": false, "rev": "bd14afd", "opt_rev": "0.8.7"}, "signature": [[{"alpha": 0.019628224813442792, "batch_size": 182, "beta_1": 0.9410202200271762, "beta_2": 0.9998021557676793, "epsilon": 1.8662266976518e-08, "hidden_layer_sizes": 147, "learning_rate_init": 0.0005627932047415167, "tol": 0.03690557729213761, "validation_fraction": 0.8846827852548593}, {"alpha": 0.001998246739232944, "batch_size": 200, "beta_1": 0.919111482530466, "beta_2": 0.9998488260436156, "epsilon": 5.981221901152555e-07, "hidden_layer_sizes": 61, "learning_rate_init": 2.2310905607443014e-05, "tol": 1.2046852412030316e-05, "validation_fraction": 0.8117896445826539}, {"alpha": 0.46659545670218433, "batch_size": 219, "beta_1": 0.9889789783750891, "beta_2": 0.9999896868093284, "epsilon": 2.4234724484675948e-08, "hidden_layer_sizes": 167, "learning_rate_init": 2.972334644335654e-05, "tol": 0.0036281404040243792, "validation_fraction": 0.17260651658522078}, {"alpha": 4.656005689076002, "batch_size": 135, "beta_1": 0.870503881627747, "beta_2": 0.9948873266941017, "epsilon": 2.1023308743480125e-07, "hidden_layer_sizes": 118, "learning_rate_init": 0.001878173875716191, "tol": 1.1889379831773006e-05, "validation_fraction": 0.6264327093752792}, {"alpha": 0.04705159350400542, "batch_size": 158, "beta_1": 0.9870884262730957, "beta_2": 0.9999596874382349, "epsilon": 1.1981845126013875e-08, "hidden_layer_sizes": 116, "learning_rate_init": 0.006173405204074311, "tol": 1.7414134181586194e-05, "validation_fraction": 0.6754299026638921}], [0.6825615448521275, 1.1767619120314543, 0.4893857126912963, 0.207702708114683, 0.3171777602725132]]},
"data": {"coords": {"iter": {"dims": ["iter"], "attrs": {}, "data": [0, 1, 2, 3, 4, 5, 6, 7, 8, 9, 10, 11, 12, 13, 14, 15, 16, 17, 18, 19]}, "suggestion": {"dims": ["suggestion"], "attrs": {}, "data": [0]}}, "attrs": {}, "dims": {"iter": 20, "suggestion": 1}, "data_vars": {"alpha": {"dims": ["iter", "suggestion"], "attrs": {}, "data": [[5.723482738921658], [5.723482738921658], [6.52356026447449], [8.861322112689852], [6.622890467352406], [6.52356026447449], [6.52356026447449], [5.9423436351380365], [6.52356026447449], [1.1076434959003612], [6.52356026447449], [6.52356026447449], [0.28010493182531254], [6.133561912480101], [6.133561912480101], [6.133561912480101], [3.369232821284719], [6.133561912480101], [6.133561912480101], [6.133561912480101]]}, "batch_size": {"dims": ["iter", "suggestion"], "attrs": {}, "data": [[31], [31], [136], [245], [113], [136], [136], [136], [136], [19], [136], [112], [96], [240], [240], [240], [44], [240], [240], [240]]}, "beta_1": {"dims": ["iter", "suggestion"], "attrs": {}, "data": [[0.9373561589272121], [0.9373561589272121], [0.827101652218022], [0.8319526172340637], [0.9307645602774967], [0.827101652218022], [0.5310819928769391], [0.5310819928769391], [0.5310819928769391], [0.6513069138335208], [0.5310819928769391], [0.5310819928769391], [0.623586839871557], [0.6083697607955784], [0.6083697607955784], [0.6083697607955784], [0.5215868221758827], [0.6083697607955784], [0.6083697607955784], [0.6083697607955784]]}, "beta_2": {"dims": ["iter", "suggestion"], "attrs": {}, "data": [[0.9134551631038592], [0.9134551631038592], [0.9303700757678066], [0.9307669766184802], [0.9991286002439594], [0.9303700757678066], [0.9303700757678066], [0.9303700757678066], [0.9468224817947966], [0.9049992880877316], [0.9303700757678066], [0.9303700757678066], [0.9544690246262095], [0.9624782680922215], [0.9882343448975465], [0.9882343448975465], [0.9972494006407007], [0.9882343448975465], [0.9882343448975465], [0.9882343448975465]]}, "epsilon": {"dims": ["iter", "suggestion"], "attrs": {}, "data": [[8.62504300342375e-07], [8.62504300342375e-07], [2.7463313096414253e-08], [3.2584184919745476e-07], [6.930415431821425e-07], [2.7463313096414253e-08], [2.7463313096414253e-08], [2.7463313096414253e-08], [2.7463313096414253e-08], [9.489620017849299e-07], [2.7463313096414253e-08], [2.7463313096414253e-08], [6.745949813485575e-07], [4.1592858104952293e-07], [4.1592858104952293e-07], [4.1592858104952293e-07], [6.559330724414659e-07], [4.1592858104952293e-07], [4.1592858104952293e-07], [4.1592858104952293e-07]]}, "hidden_layer_sizes": {"dims": ["iter", "suggestion"], "attrs": {}, "data": [[137], [137], [91], [168], [140], [138], [138], [138], [138], [105], [87], [138], [146], [68], [68], [119], [59], [80], [119], [173]]}, "learning_rate_init": {"dims": ["iter", "suggestion"], "attrs": {}, "data": [[0.031103029672966343], [0.031103029672966343], [0.0025200813066845085], [0.025985053855233465], [0.010861895213222606], [0.0025200813066845085], [0.0025200813066845085], [0.0025200813066845085], [0.0025200813066845085], [0.03228800734223152], [0.0025200813066845085], [0.0025200813066845085], [0.019902652711468006], [0.00360078881882402], [0.00360078881882402], [0.00360078881882402], [0.03509223711123249], [0.00360078881882402], [0.00360078881882402], [0.00360078881882402]]}, "tol": {"dims": ["iter", "suggestion"], "attrs": {}, "data": [[0.011013276178438437], [0.027140090340057977], [0.03944651259966119], [0.09354076106947022], [0.05125198070840347], [0.03944651259966119], [0.03944651259966119], [0.03944651259966119], [0.03944651259966119], [0.09248611250828113], [0.03944651259966119], [0.03944651259966119], [0.01873750373799259], [0.014099003031554359], [0.014099003031554359], [0.014099003031554359], [0.05826311322179827], [0.014099003031554359], [0.014099003031554359], [0.014099003031554359]]}, "validation_fraction": {"dims": ["iter", "suggestion"], "attrs": {}, "data": [[0.27246740733246466], [0.27246740733246466], [0.3090715612625175], [0.5248376279989956], [0.7801086933352813], [0.3090715612625175], [0.3090715612625175], [0.3090715612625175], [0.3090715612625175], [0.7083082083813158], [0.3090715612625175], [0.8544567471868494], [0.11984274835854941], [0.12481582905924374], [0.12481582905924374], [0.12481582905924374], [0.4667619899997194], [0.14458993181428445], [0.1616780307365696], [0.12481582905924374]]}}}}
