# Supplementary material
Source: ML conference proceedings conference paper supplement (https://proceedings.neurips.cc/paper_files/paper/2022/hash/31a57804448363bcab777f818f75f5b4-Abstract.html)
Supplement: Supplementary file 1 [file 31a57804448363bcab777f818f75f5b4-Supplemental-Conference.zip › trading_off_resource_budgets_f-Supplementary Material/code_and_data/experiments/base_results/bo_20220228_124924_b7rkpeqg/suggest_log/0895f09e28dc581bbca953bb28aec845.json]

{"meta": {"args": {"--uuid": "0895f09e28dc581bbca953bb28aec845", "-db-root": "/home/damon_falck/blackboxbandits/experiments/saved_results", "--opt-root": "/home/damon_falck/blackboxbandits/experiments", "--data-root": "/home/damon_falck/blackboxbandits/experiments/penn_datasets", "--db": "bo_20220228_124924_b7rkpeqg", "--opt": "PySOT", "--data": "reg-527-analcatdata-election2000", "--classifier": "lasso", "--metric": "mse", "--calls": 20, "--suggestions": 1, "--jobs-file": null, "--verbose": false, "dry_run": false, "rev": "bd14afd", "opt_rev": "0.3.3"}, "signature": [[{"alpha": 1.5676677195506077, "fit_intercept": true, "max_iter": 423, "normalize": true, "positive": false, "tol": 0.0038333321561566623}, {"alpha": 0.5627932047415171, "fit_intercept": true, "max_iter": 3989, "normalize": false, "positive": true, "tol": 0.001304907355036239}, {"alpha": 1.871450068624068, "fit_intercept": true, "max_iter": 16, "normalize": false, "positive": false, "tol": 0.021403233140986057}, {"alpha": 12.960656597279737, "fit_intercept": true, "max_iter": 4378, "normalize": true, "positive": false, "tol": 0.013246974647468445}, {"alpha": 0.029723346443356558, "fit_intercept": true, "max_iter": 24, "normalize": true, "positive": true, "tol": 0.00045566719139214756}], [2.6886356698782423, 0.27932362370125563, 2.0940449817843327, 2.6886356698782423, 0.11283562949020225]]},
"data": {"coords": {"iter": {"dims": ["iter"], "attrs": {}, "data": [0, 1, 2, 3, 4, 5, 6, 7, 8, 9, 10, 11, 12, 13, 14, 15, 16, 17, 18, 19]}, "suggestion": {"dims": ["suggestion"], "attrs": {}, "data": [0]}}, "attrs": {}, "dims": {"iter": 20, "suggestion": 1}, "data_vars": {"alpha": {"dims": ["iter", "suggestion"], "attrs": {}, "data": [[100.0], [49.238826317067485], [24.244620170823318], [11.937766417144388], [5.878016072274916], [2.894266124716754], [1.425102670302999], [0.7017038286703836], [0.34551072945922234], [0.170125427985259], [0.08376776400682925], [0.04124626382901354], [0.020309176209047364], [0.010000000000000005], [0.010409820075076695], [0.0101030570880956], [0.010965102534908884], [0.014955418913845579], [0.1419661322029078], [0.018611085571766574]]}, "fit_intercept": {"dims": ["iter", "suggestion"], "attrs": {}, "data": [[false], [false], [false], [false], [true], [true], [true], [false], [false], [false], [true], [true], [true], [true], [true], [true], [true], [true], [true], [true]]}, "max_iter": {"dims": ["iter", "suggestion"], "attrs": {}, "data": [[42], [109], [26], [10], [739], [176], [16], [3100], [284], [68], [5000], [1922], [458], [1192], [16], [3768], [1732], [2384], [193], [141]]}, "normalize": {"dims": ["iter", "suggestion"], "attrs": {}, "data": [[true], [false], [false], [true], [true], [true], [false], [true], [false], [false], [false], [true], [true], [false], [true], [false], [false], [false], [false], [false]]}, "positive": {"dims": ["iter", "suggestion"], "attrs": {}, "data": [[false], [false], [false], [false], [true], [true], [true], [false], [false], [false], [true], [true], [true], [true], [true], [true], [true], [false], [true], [true]]}, "tol": {"dims": ["iter", "suggestion"], "attrs": {}, "data": [[0.1], [0.0014251026703029981], [2.0309176209047345e-05], [0.01193776641714438], [4.1246263829013545e-05], [0.005878016072274912], [0.00034551072945922224], [0.002894266124716752], [0.00017012542798525883], [0.0242446201708233], [8.37677640068292e-05], [0.04923882631706745], [0.0007017038286703831], [1e-05], [2.152656549809897e-05], [0.00029443523541729], [4.975749110868936e-05], [0.00014611283335639634], [1.0350441384169996e-05], [9.268821683815357e-05]]}}}}
