# Supplementary material
Source: ML conference proceedings conference paper supplement (https://proceedings.neurips.cc/paper_files/paper/2022/hash/31a57804448363bcab777f818f75f5b4-Abstract.html)
Supplement: Supplementary file 1 [file 31a57804448363bcab777f818f75f5b4-Supplemental-Conference.zip › trading_off_resource_budgets_f-Supplementary Material/code_and_data/experiments/base_results/bo_20220228_124924_b7rkpeqg/suggest_log/0930e9bb677e548a89d86d7e3ea2b290.json]

{"meta": {"args": {"--uuid": "0930e9bb677e548a89d86d7e3ea2b290", "-db-root": "/home/damon_falck/blackboxbandits/experiments/saved_results", "--opt-root": "/home/damon_falck/blackboxbandits/experiments", "--data-root": "/home/damon_falck/blackboxbandits/experiments/penn_datasets", "--db": "bo_20220228_124924_b7rkpeqg", "--opt": "Scikit-GBRT-Hedge", "--data": "reg-1203-BNG-pwLinear", "--classifier": "MLP-adam", "--metric": "mse", "--calls": 20, "--suggestions": 1, "--jobs-file": null, "--verbose": false, "dry_run": false, "rev": "bd14afd", "opt_rev": "0.9.0"}, "signature": [[{"alpha": 0.019628224813442792, "batch_size": 182, "beta_1": 0.9410202200271762, "beta_2": 0.9998021557676793, "epsilon": 1.8662266976518e-08, "hidden_layer_sizes": 147, "learning_rate_init": 0.0005627932047415167, "tol": 0.03690557729213761, "validation_fraction": 0.8846827852548593}, {"alpha": 0.001998246739232944, "batch_size": 200, "beta_1": 0.919111482530466, "beta_2": 0.9998488260436156, "epsilon": 5.981221901152555e-07, "hidden_layer_sizes": 61, "learning_rate_init": 2.2310905607443014e-05, "tol": 1.2046852412030316e-05, "validation_fraction": 0.8117896445826539}, {"alpha": 0.46659545670218433, "batch_size": 219, "beta_1": 0.9889789783750891, "beta_2": 0.9999896868093284, "epsilon": 2.4234724484675948e-08, "hidden_layer_sizes": 167, "learning_rate_init": 2.972334644335654e-05, "tol": 0.0036281404040243792, "validation_fraction": 0.17260651658522078}, {"alpha": 4.656005689076002, "batch_size": 135, "beta_1": 0.870503881627747, "beta_2": 0.9948873266941017, "epsilon": 2.1023308743480125e-07, "hidden_layer_sizes": 118, "learning_rate_init": 0.001878173875716191, "tol": 1.1889379831773006e-05, "validation_fraction": 0.6264327093752792}, {"alpha": 0.04705159350400542, "batch_size": 158, "beta_1": 0.9870884262730957, "beta_2": 0.9999596874382349, "epsilon": 1.1981845126013875e-08, "hidden_layer_sizes": 116, "learning_rate_init": 0.006173405204074311, "tol": 1.7414134181586194e-05, "validation_fraction": 0.6754299026638921}], [0.3529057901526425, 0.35607649758063753, 0.352143542732075, 0.3624924923376388, 0.33902896976884067]]},
"data": {"coords": {"iter": {"dims": ["iter"], "attrs": {}, "data": [0, 1, 2, 3, 4, 5, 6, 7, 8, 9, 10, 11, 12, 13, 14, 15, 16, 17, 18, 19]}, "suggestion": {"dims": ["suggestion"], "attrs": {}, "data": [0]}}, "attrs": {}, "dims": {"iter": 20, "suggestion": 1}, "data_vars": {"alpha": {"dims": ["iter", "suggestion"], "attrs": {}, "data": [[1.0585142072077875e-05], [9.60003827573358], [0.000493498323083638], [0.002302334086354221], [1.2601433560499178e-05], [0.6323301881724552], [6.829839901281838], [1.658502063151199e-05], [0.0001578009595121004], [0.0009502657971903223], [8.324987439701228], [5.3465202135686455e-05], [6.130205783700197e-05], [0.0004374063395364135], [9.964481044892139], [2.8380507949948737e-05], [8.948058884201767], [1.0873826509011023e-05], [5.1375001913695516e-05], [0.0002583468151636253]]}, "batch_size": {"dims": ["iter", "suggestion"], "attrs": {}, "data": [[41], [132], [116], [141], [174], [139], [111], [183], [190], [198], [192], [187], [183], [66], [148], [180], [54], [242], [236], [211]]}, "beta_1": {"dims": ["iter", "suggestion"], "attrs": {}, "data": [[0.7372955449712202], [0.7559915162590142], [0.5291176823373132], [0.7753205380471476], [0.8898384948579265], [0.6104678629876681], [0.527122899384236], [0.5378634150713935], [0.565831074724728], [0.5059578040587367], [0.7888440407046566], [0.5504811289375982], [0.5777488845149438], [0.5659795319677247], [0.5526253915580746], [0.5513143768770224], [0.7557204266839787], [0.5038656711209724], [0.5220030828481754], [0.50247385747994]]}, "beta_2": {"dims": ["iter", "suggestion"], "attrs": {}, "data": [[0.9875156405297248], [0.9065677456887452], [0.9799304901041761], [0.9584753625090916], [0.9869072629119853], [0.9261144633751427], [0.97865164427524], [0.9977624359330889], [0.9115609164918693], [0.9026959618385387], [0.9935334256070212], [0.9094299430274144], [0.9516998211448157], [0.9738804539217668], [0.9466618585891419], [0.9750221089439283], [0.9040991943592449], [0.9040318380279788], [0.975336826017066], [0.942623972550193]]}, "epsilon": {"dims": ["iter", "suggestion"], "attrs": {}, "data": [[1.0155464922376372e-08], [1.2841994940877545e-09], [1.031105003281849e-08], [1.464009495869474e-07], [2.3790109962980332e-07], [2.702180415024337e-07], [1.0041898230879525e-09], [1.9665306107602093e-07], [1.7269749647899513e-08], [1.2010661954527227e-09], [9.726048537401166e-08], [1.633768154430102e-07], [3.624888752822685e-08], [4.5437760373289696e-07], [5.267537813696749e-08], [4.812993145644942e-09], [2.6371613931034222e-09], [4.649994281171882e-08], [1.3016418998737848e-08], [6.93035430276838e-08]]}, "hidden_layer_sizes": {"dims": ["iter", "suggestion"], "attrs": {}, "data": [[95], [124], [152], [180], [133], [158], [182], [162], [169], [148], [130], [163], [153], [178], [197], [188], [75], [55], [197], [185]]}, "learning_rate_init": {"dims": ["iter", "suggestion"], "attrs": {}, "data": [[0.03460010330719156], [0.04972615979404558], [0.011359238473113526], [0.03663729834613839], [3.295313966590895e-05], [0.08388599555562587], [1.571470923906332e-05], [0.0008280760429376045], [0.0001213852045485618], [0.05262336977502431], [3.743952626203421e-05], [0.0003026088941648895], [0.04721866934599628], [0.0745013036563366], [0.010126603270427338], [8.404825910396482e-05], [0.00010701349359083143], [0.0016322209076223445], [1.229742379713888e-05], [0.000285661838577067]]}, "tol": {"dims": ["iter", "suggestion"], "attrs": {}, "data": [[0.0019031513638255683], [0.0007726816708996541], [0.00028369034083015134], [8.532263926940832e-05], [0.08608649804177237], [6.968619580769356e-05], [0.0004618129150357017], [0.0001639420480507343], [5.305373632671099e-05], [2.247106980082877e-05], [0.0001017675587814973], [5.0323056742903025e-05], [3.2537387338156704e-05], [3.506101012437557e-05], [0.0004966430130037622], [1.224622102569231e-05], [0.00010430459983780684], [5.3102039809370373e-05], [8.31394372391558e-05], [1.6849081866328306e-05]]}, "validation_fraction": {"dims": ["iter", "suggestion"], "attrs": {}, "data": [[0.1476793444981752], [0.5714232212212235], [0.17144567050739548], [0.37658111848806636], [0.6336370159322393], [0.10923353648449474], [0.6199066888242725], [0.1820413389884853], [0.18262936257721887], [0.10311845991024567], [0.3086079234020098], [0.14821833529855813], [0.5941812685868946], [0.18570289228258227], [0.2715052447416473], [0.16036480623073618], [0.10315881367698114], [0.14717056699898207], [0.13019644931121663], [0.22566124390802858]]}}}}
