# Supplementary material
Source: ML conference proceedings conference paper supplement (https://proceedings.neurips.cc/paper_files/paper/2022/hash/31a57804448363bcab777f818f75f5b4-Abstract.html)
Supplement: Supplementary file 1 [file 31a57804448363bcab777f818f75f5b4-Supplemental-Conference.zip › trading_off_resource_budgets_f-Supplementary Material/code_and_data/experiments/base_results/bo_20220228_124924_b7rkpeqg/suggest_log/00956c572ec65475a7e6016e91bb63f1.json]

{"meta": {"args": {"--uuid": "00956c572ec65475a7e6016e91bb63f1", "-db-root": "/home/damon_falck/blackboxbandits/experiments/saved_results", "--opt-root": "/home/damon_falck/blackboxbandits/experiments", "--data-root": "/home/damon_falck/blackboxbandits/experiments/penn_datasets", "--db": "bo_20220228_124924_b7rkpeqg", "--opt": "Scikit-GP-Hedge", "--data": "clf-mushroom", "--classifier": "MLP-adam", "--metric": "nll", "--calls": 20, "--suggestions": 1, "--jobs-file": null, "--verbose": false, "dry_run": false, "rev": "bd14afd", "opt_rev": "0.9.0"}, "signature": [[{"alpha": 0.019628224813442792, "batch_size": 182, "beta_1": 0.9410202200271762, "beta_2": 0.9998021557676793, "epsilon": 1.8662266976518e-08, "hidden_layer_sizes": 147, "learning_rate_init": 0.0005627932047415167, "tol": 0.03690557729213761, "validation_fraction": 0.8846827852548593}, {"alpha": 0.001998246739232944, "batch_size": 200, "beta_1": 0.919111482530466, "beta_2": 0.9998488260436156, "epsilon": 5.981221901152555e-07, "hidden_layer_sizes": 61, "learning_rate_init": 2.2310905607443014e-05, "tol": 1.2046852412030316e-05, "validation_fraction": 0.8117896445826539}, {"alpha": 0.46659545670218433, "batch_size": 219, "beta_1": 0.9889789783750891, "beta_2": 0.9999896868093284, "epsilon": 2.4234724484675948e-08, "hidden_layer_sizes": 167, "learning_rate_init": 2.972334644335654e-05, "tol": 0.0036281404040243792, "validation_fraction": 0.17260651658522078}, {"alpha": 4.656005689076002, "batch_size": 135, "beta_1": 0.870503881627747, "beta_2": 0.9948873266941017, "epsilon": 2.1023308743480125e-07, "hidden_layer_sizes": 118, "learning_rate_init": 0.001878173875716191, "tol": 1.1889379831773006e-05, "validation_fraction": 0.6264327093752792}, {"alpha": 0.04705159350400542, "batch_size": 158, "beta_1": 0.9870884262730957, "beta_2": 0.9999596874382349, "epsilon": 1.1981845126013875e-08, "hidden_layer_sizes": 116, "learning_rate_init": 0.006173405204074311, "tol": 1.7414134181586194e-05, "validation_fraction": 0.6754299026638921}], [0.11247829028677332, 0.23954199874013077, 0.14839636315854907, 0.045861844746691686, 0.012514392088282422]]},
"data": {"coords": {"iter": {"dims": ["iter"], "attrs": {}, "data": [0, 1, 2, 3, 4, 5, 6, 7, 8, 9, 10, 11, 12, 13, 14, 15, 16, 17, 18, 19]}, "suggestion": {"dims": ["suggestion"], "attrs": {}, "data": [0]}}, "attrs": {}, "dims": {"iter": 20, "suggestion": 1}, "data_vars": {"alpha": {"dims": ["iter", "suggestion"], "attrs": {}, "data": [[0.04594045001400231], [1.6724225362546324e-05], [0.015909902314263747], [1.4168969996392509], [3.9091603222323497], [0.37413005750503736], [1.7515184191453426], [2.070520748981756e-05], [0.00016232002293208107], [1e-05], [1.0029724086249242e-05], [10.0], [0.0037306244040798075], [0.00022013503752085873], [0.06769820140116217], [0.1103797388681563], [2.322239622099691e-05], [1.1526404930650962e-05], [0.05099750347190851], [0.042068919375080144]]}, "batch_size": {"dims": ["iter", "suggestion"], "attrs": {}, "data": [[54], [27], [194], [89], [105], [26], [61], [142], [250], [41], [10], [10], [15], [24], [20], [250], [24], [10], [138], [137]]}, "beta_1": {"dims": ["iter", "suggestion"], "attrs": {}, "data": [[0.9756948188540921], [0.513040094597584], [0.7825069189867039], [0.6118909335993329], [0.8427173161669508], [0.5616374074330023], [0.5], [0.5], [0.5037941430640324], [0.5], [0.7100002066032853], [0.549803354519159], [0.5771400813501874], [0.8218304383196908], [0.8624139730316049], [0.5032217767443053], [0.5791348728304306], [0.8355726603209435], [0.7051370237469459], [0.9342737655821827]]}, "beta_2": {"dims": ["iter", "suggestion"], "attrs": {}, "data": [[0.9047181474456178], [0.9702284329833283], [0.9718403397881497], [0.9795381626182499], [0.9627175275673318], [0.918216494402981], [0.9465011750372194], [0.9855462088336852], [0.999999], [0.9], [0.9171370851470461], [0.9], [0.9], [0.999999], [0.9], [0.999999], [0.9680172667197102], [0.9801932125927568], [0.9095575412138139], [0.9]]}, "epsilon": {"dims": ["iter", "suggestion"], "attrs": {}, "data": [[7.817349124896571e-07], [1.0257569947065072e-09], [8.402152860851856e-08], [6.881540039474063e-08], [8.072108726970865e-08], [2.9002288470025147e-09], [6.635778422446383e-08], [5.644733087902787e-09], [4.383048799830781e-07], [1e-09], [1e-09], [2.303524302758745e-09], [2.76730108308984e-09], [1e-09], [1.3259614791059156e-08], [1.3622574991386409e-08], [1e-09], [1.0963677167810624e-09], [6.658369685364063e-08], [2.0130091034846168e-07]]}, "hidden_layer_sizes": {"dims": ["iter", "suggestion"], "attrs": {}, "data": [[65], [186], [195], [95], [176], [109], [57], [176], [147], [137], [162], [113], [50], [54], [130], [189], [196], [200], [168], [200]]}, "learning_rate_init": {"dims": ["iter", "suggestion"], "attrs": {}, "data": [[0.04337313205210302], [3.779451336177886e-05], [7.545108059903876e-05], [0.00017726379074670855], [0.00046387824126659674], [0.0003802320164721816], [0.027613808606190164], [0.07628357755383784], [0.1], [5.104271554980133e-05], [6.670474448186681e-05], [0.04442045563531553], [0.018613435215384475], [1.6106867248948092e-05], [0.06437484204127916], [0.0011264083987820599], [0.00011986721955565389], [0.00011793713345822714], [5.4370027276984595e-05], [0.1]]}, "tol": {"dims": ["iter", "suggestion"], "attrs": {}, "data": [[2.281779024923367e-05], [0.000612582674220624], [3.10158311859991e-05], [0.008738689560323525], [0.023953365268856927], [0.0017120625338397644], [1e-05], [0.1], [0.1], [0.013319068101273746], [0.03451947616964358], [0.0013869436588268304], [2.2995957037669e-05], [0.055756447746419656], [3.90868656683886e-05], [0.017963905246437067], [0.00017982215804655778], [0.07629531415769661], [0.0007841663605198057], [0.1]]}, "validation_fraction": {"dims": ["iter", "suggestion"], "attrs": {}, "data": [[0.4602336680826086], [0.423574654918767], [0.6038920677023689], [0.2401289783576579], [0.514991822643732], [0.5630077010538018], [0.1], [0.1], [0.1], [0.798937384228102], [0.1], [0.13832684335337553], [0.30408984655994686], [0.1], [0.1215208462939947], [0.1], [0.1], [0.1], [0.5811242411113293], [0.11077474882523022]]}}}}
