# Supplementary material
Source: ML conference proceedings conference paper supplement (https://proceedings.neurips.cc/paper_files/paper/2022/hash/31a57804448363bcab777f818f75f5b4-Abstract.html)
Supplement: Supplementary file 1 [file 31a57804448363bcab777f818f75f5b4-Supplemental-Conference.zip › trading_off_resource_budgets_f-Supplementary Material/code_and_data/experiments/base_results/bo_20220228_124924_b7rkpeqg/suggest_log/01395c2a52ea549ab30f2e60ce9b020f.json]

{"meta": {"args": {"--uuid": "01395c2a52ea549ab30f2e60ce9b020f", "-db-root": "/home/damon_falck/blackboxbandits/experiments/saved_results", "--opt-root": "/home/damon_falck/blackboxbandits/experiments", "--data-root": "/home/damon_falck/blackboxbandits/experiments/penn_datasets", "--db": "bo_20220228_124924_b7rkpeqg", "--opt": "OpenTuner-GA", "--data": "reg-522-pm10", "--classifier": "MLP-adam", "--metric": "mse", "--calls": 20, "--suggestions": 1, "--jobs-file": null, "--verbose": false, "dry_run": false, "rev": "bd14afd", "opt_rev": "0.8.7"}, "signature": [[{"alpha": 0.019628224813442792, "batch_size": 182, "beta_1": 0.9410202200271762, "beta_2": 0.9998021557676793, "epsilon": 1.8662266976518e-08, "hidden_layer_sizes": 147, "learning_rate_init": 0.0005627932047415167, "tol": 0.03690557729213761, "validation_fraction": 0.8846827852548593}, {"alpha": 0.001998246739232944, "batch_size": 200, "beta_1": 0.919111482530466, "beta_2": 0.9998488260436156, "epsilon": 5.981221901152555e-07, "hidden_layer_sizes": 61, "learning_rate_init": 2.2310905607443014e-05, "tol": 1.2046852412030316e-05, "validation_fraction": 0.8117896445826539}, {"alpha": 0.46659545670218433, "batch_size": 219, "beta_1": 0.9889789783750891, "beta_2": 0.9999896868093284, "epsilon": 2.4234724484675948e-08, "hidden_layer_sizes": 167, "learning_rate_init": 2.972334644335654e-05, "tol": 0.0036281404040243792, "validation_fraction": 0.17260651658522078}, {"alpha": 4.656005689076002, "batch_size": 135, "beta_1": 0.870503881627747, "beta_2": 0.9948873266941017, "epsilon": 2.1023308743480125e-07, "hidden_layer_sizes": 118, "learning_rate_init": 0.001878173875716191, "tol": 1.1889379831773006e-05, "validation_fraction": 0.6264327093752792}, {"alpha": 0.04705159350400542, "batch_size": 158, "beta_1": 0.9870884262730957, "beta_2": 0.9999596874382349, "epsilon": 1.1981845126013875e-08, "hidden_layer_sizes": 116, "learning_rate_init": 0.006173405204074311, "tol": 1.7414134181586194e-05, "validation_fraction": 0.6754299026638921}], [0.9832869742645618, 1.0659744293167754, 1.1028012441023252, 0.8238120316035543, 0.812091485603516]]},
"data": {"coords": {"iter": {"dims": ["iter"], "attrs": {}, "data": [0, 1, 2, 3, 4, 5, 6, 7, 8, 9, 10, 11, 12, 13, 14, 15, 16, 17, 18, 19]}, "suggestion": {"dims": ["suggestion"], "attrs": {}, "data": [0]}}, "attrs": {}, "dims": {"iter": 20, "suggestion": 1}, "data_vars": {"alpha": {"dims": ["iter", "suggestion"], "attrs": {}, "data": [[1.546961655968118], [1.9063364406144077], [1.7975471892699906], [1.7975471892699906], [1.7975471892699906], [0.017188483500685626], [1.7975471892699906], [2.4812643000232035], [1.7975471892699906], [0.668713423422208], [1.7975471892699906], [2.078261832354519], [2.649425770720848], [1.7975471892699906], [3.0618971119348974], [1.7975471892699906], [1.7975471892699906], [1.7975471892699906], [3.7469513868206668], [4.16349240234648]]}, "batch_size": {"dims": ["iter", "suggestion"], "attrs": {}, "data": [[206], [87], [137], [137], [137], [72], [137], [137], [213], [210], [137], [168], [215], [137], [99], [210], [157], [137], [249], [240]]}, "beta_1": {"dims": ["iter", "suggestion"], "attrs": {}, "data": [[0.7736647255403549], [0.9861789990157623], [0.7559534667150347], [0.7559534667150347], [0.7559534667150347], [0.7049969451149971], [0.7559534667150347], [0.7559534667150347], [0.7559534667150347], [0.519388949133883], [0.7559534667150347], [0.8791323021724311], [0.6706867936252747], [0.7559534667150347], [0.7929564354806242], [0.7559534667150347], [0.7559534667150347], [0.9472876905354243], [0.927829090448335], [0.8878541166478875]]}, "beta_2": {"dims": ["iter", "suggestion"], "attrs": {}, "data": [[0.9547886143993204], [0.9649561286613413], [0.9873814031711057], [0.9873814031711057], [0.9881839824693649], [0.9964077552964419], [0.9881839824693649], [0.9881839824693649], [0.9881839824693649], [0.970049135579217], [0.9881839824693649], [0.9347355833700234], [0.9823235682282551], [0.9881839824693649], [0.9832434957929623], [0.9881839824693649], [0.9881839824693649], [0.9881839824693649], [0.9144287085168278], [0.9350844419371144]]}, "epsilon": {"dims": ["iter", "suggestion"], "attrs": {}, "data": [[2.2625074427903746e-07], [9.082099431683966e-07], [3.721232824713161e-08], [3.721232824713161e-08], [3.721232824713161e-08], [8.205990768289363e-07], [3.721232824713161e-08], [3.721232824713161e-08], [3.721232824713161e-08], [7.573714106151309e-07], [4.370765144539869e-07], [8.801504049199261e-07], [9.432384183999099e-07], [4.370765144539869e-07], [1.227473872827668e-07], [4.370765144539869e-07], [4.370765144539869e-07], [4.370765144539869e-07], [9.697523109583505e-08], [1.9517496810447687e-07]]}, "hidden_layer_sizes": {"dims": ["iter", "suggestion"], "attrs": {}, "data": [[136], [161], [145], [145], [145], [119], [145], [145], [145], [160], [145], [195], [102], [145], [137], [145], [145], [145], [167], [64]]}, "learning_rate_init": {"dims": ["iter", "suggestion"], "attrs": {}, "data": [[0.020005545345140142], [0.005245900176305818], [0.015280795088205613], [0.017225719436392218], [0.015280795088205613], [0.0727507315769919], [0.015280795088205613], [0.015280795088205613], [0.015280795088205613], [0.06499899803872437], [0.015280795088205613], [0.0775006423640227], [0.08272428910622602], [0.015280795088205613], [0.032391470533850546], [0.015280795088205613], [0.015280795088205613], [0.015280795088205613], [0.03158470639437921], [0.02738062012218372]]}, "tol": {"dims": ["iter", "suggestion"], "attrs": {}, "data": [[0.004922496358889573], [0.011069572045851728], [0.07184914036970629], [0.07184914036970629], [0.07184914036970629], [0.018679857806718814], [0.07184914036970629], [0.07184914036970629], [0.07184914036970629], [0.0065648617512340975], [0.07184914036970629], [0.039143427887880326], [0.053671315276811286], [0.07184914036970629], [0.014022808993060899], [0.07184914036970629], [0.07184914036970629], [0.07184914036970629], [0.05551029985558114], [0.07560374011603337]]}, "validation_fraction": {"dims": ["iter", "suggestion"], "attrs": {}, "data": [[0.673852231121658], [0.11060071686496667], [0.4298915293243928], [0.8439205905500848], [0.4298915293243928], [0.7164788649530659], [0.15691300464393018], [0.15691300464393018], [0.15691300464393018], [0.4239395270700246], [0.15691300464393018], [0.2694256547605992], [0.6355213780490241], [0.14164521091604085], [0.20289949710301008], [0.15691300464393018], [0.15691300464393018], [0.15691300464393018], [0.7902997376569791], [0.7281183371940589]]}}}}
