# Supplementary material
Source: ML conference proceedings conference paper supplement (https://proceedings.neurips.cc/paper_files/paper/2022/hash/31a57804448363bcab777f818f75f5b4-Abstract.html)
Supplement: Supplementary file 1 [file 31a57804448363bcab777f818f75f5b4-Supplemental-Conference.zip › trading_off_resource_budgets_f-Supplementary Material/code_and_data/experiments/base_results/bo_20220228_124924_b7rkpeqg/suggest_log/01509ba000bb57cb8c39d1bb0d5e7f03.json]

{"meta": {"args": {"--uuid": "01509ba000bb57cb8c39d1bb0d5e7f03", "-db-root": "/home/damon_falck/blackboxbandits/experiments/saved_results", "--opt-root": "/home/damon_falck/blackboxbandits/experiments", "--data-root": "/home/damon_falck/blackboxbandits/experiments/penn_datasets", "--db": "bo_20220228_124924_b7rkpeqg", "--opt": "Scikit-GBRT-Hedge", "--data": "clf-GAMETES-Epistasis-3-Way-20atts-0.2H-EDM-1-1", "--classifier": "MLP-adam", "--metric": "nll", "--calls": 20, "--suggestions": 1, "--jobs-file": null, "--verbose": false, "dry_run": false, "rev": "bd14afd", "opt_rev": "0.9.0"}, "signature": [[{"alpha": 0.019628224813442792, "batch_size": 182, "beta_1": 0.9410202200271762, "beta_2": 0.9998021557676793, "epsilon": 1.8662266976518e-08, "hidden_layer_sizes": 147, "learning_rate_init": 0.0005627932047415167, "tol": 0.03690557729213761, "validation_fraction": 0.8846827852548593}, {"alpha": 0.001998246739232944, "batch_size": 200, "beta_1": 0.919111482530466, "beta_2": 0.9998488260436156, "epsilon": 5.981221901152555e-07, "hidden_layer_sizes": 61, "learning_rate_init": 2.2310905607443014e-05, "tol": 1.2046852412030316e-05, "validation_fraction": 0.8117896445826539}, {"alpha": 0.46659545670218433, "batch_size": 219, "beta_1": 0.9889789783750891, "beta_2": 0.9999896868093284, "epsilon": 2.4234724484675948e-08, "hidden_layer_sizes": 167, "learning_rate_init": 2.972334644335654e-05, "tol": 0.0036281404040243792, "validation_fraction": 0.17260651658522078}, {"alpha": 4.656005689076002, "batch_size": 135, "beta_1": 0.870503881627747, "beta_2": 0.9948873266941017, "epsilon": 2.1023308743480125e-07, "hidden_layer_sizes": 118, "learning_rate_init": 0.001878173875716191, "tol": 1.1889379831773006e-05, "validation_fraction": 0.6264327093752792}, {"alpha": 0.04705159350400542, "batch_size": 158, "beta_1": 0.9870884262730957, "beta_2": 0.9999596874382349, "epsilon": 1.1981845126013875e-08, "hidden_layer_sizes": 116, "learning_rate_init": 0.006173405204074311, "tol": 1.7414134181586194e-05, "validation_fraction": 0.6754299026638921}], [0.7359563907103207, 0.8776760424514997, 0.743295730505191, 0.7052044690377872, 0.8431408667344226]]},
"data": {"coords": {"iter": {"dims": ["iter"], "attrs": {}, "data": [0, 1, 2, 3, 4, 5, 6, 7, 8, 9, 10, 11, 12, 13, 14, 15, 16, 17, 18, 19]}, "suggestion": {"dims": ["suggestion"], "attrs": {}, "data": [0]}}, "attrs": {}, "dims": {"iter": 20, "suggestion": 1}, "data_vars": {"alpha": {"dims": ["iter", "suggestion"], "attrs": {}, "data": [[2.0230513167674102], [0.0033009580598457873], [0.00012010029588956732], [0.0003411745490664785], [7.846578879420451], [8.385181293507099e-05], [0.0024100643589975664], [0.2291123964201733], [1.9957935044464405], [1.2402812575019626], [6.171328850333891], [1.6052072118927823], [0.005058436550122241], [1.6623203049358672], [8.085905868702302], [0.0001788828811810793], [8.670862189535242], [2.490836461950479e-05], [1.456653220558884], [7.080263811950711]]}, "batch_size": {"dims": ["iter", "suggestion"], "attrs": {}, "data": [[210], [145], [128], [124], [55], [248], [65], [73], [71], [169], [41], [191], [137], [59], [79], [39], [62], [215], [121], [194]]}, "beta_1": {"dims": ["iter", "suggestion"], "attrs": {}, "data": [[0.8710055637395052], [0.9274799785385109], [0.6029104021173682], [0.5153057155832815], [0.5247291693082912], [0.8225948921029197], [0.8195229451476586], [0.8075037568706946], [0.5219184712602472], [0.5307367200492248], [0.9886575779574327], [0.7096223890272293], [0.5315284523506482], [0.9293927269308204], [0.5163367206906175], [0.8370451959638531], [0.5137318121805574], [0.6613623337654867], [0.629160623780122], [0.5297496257697238]]}, "beta_2": {"dims": ["iter", "suggestion"], "attrs": {}, "data": [[0.9136938568446344], [0.9170590148790941], [0.9668635325125803], [0.9131752422744384], [0.9187363001908019], [0.94761296446934], [0.9757717294606727], [0.9095914747916165], [0.9947647181948658], [0.9261431143135705], [0.9619463943609955], [0.9555020088062904], [0.9792095579401557], [0.9285277594396848], [0.9803982731950109], [0.9731082359548908], [0.9848702321880796], [0.9003104066422078], [0.9311202597245721], [0.9459616192817543]]}, "epsilon": {"dims": ["iter", "suggestion"], "attrs": {}, "data": [[9.345917460816316e-08], [1.4230431097808278e-08], [3.017704041922009e-08], [8.71012909038855e-08], [3.5295424383321337e-09], [1.4207302227946823e-09], [2.104586846502701e-08], [4.2465086580736194e-07], [1.744430870490497e-09], [2.5157804199839345e-08], [1.751660984217996e-08], [2.2708227285892536e-09], [1.4937507066691362e-09], [1.7728109751490407e-08], [1.4849375792928435e-08], [1.203244621488637e-07], [8.500338154290648e-09], [4.6324230872180105e-07], [4.016370085366349e-08], [7.585717997955432e-09]]}, "hidden_layer_sizes": {"dims": ["iter", "suggestion"], "attrs": {}, "data": [[161], [127], [184], [125], [181], [199], [129], [72], [75], [181], [130], [193], [159], [120], [58], [170], [72], [106], [128], [74]]}, "learning_rate_init": {"dims": ["iter", "suggestion"], "attrs": {}, "data": [[0.018545438856847445], [0.00010536372864510007], [0.08591569991621104], [0.0017641571849533898], [0.010670584475418023], [0.05148233593053068], [0.0698441569107131], [0.012735743552233569], [0.0036201105629794883], [0.08428577927780426], [0.0912757965120682], [6.203892514925827e-05], [0.08603600648076305], [0.0951238013166607], [0.0919374896809987], [0.08667311523065935], [0.05485534770730294], [0.09073217307663507], [0.00817243100245943], [0.08800002579790019]]}, "tol": {"dims": ["iter", "suggestion"], "attrs": {}, "data": [[0.002720673293205657], [0.0007128196203840374], [7.484057236897845e-05], [2.0050026036621084e-05], [0.06907586170720269], [0.058942570522664245], [0.0928687853351099], [0.00011944555995361475], [5.459293745931001e-05], [0.00036685867529652314], [4.302621355690416e-05], [0.011831271746896093], [0.0006590225445429993], [0.030427002310116476], [0.001189478157827401], [0.003918512182739722], [0.009223874216698593], [3.361697076909432e-05], [0.02640044352253169], [0.022563465064415995]]}, "validation_fraction": {"dims": ["iter", "suggestion"], "attrs": {}, "data": [[0.10586429909629036], [0.22517466383246476], [0.10026012256120462], [0.14035500369193868], [0.13912520474894158], [0.5126352308809784], [0.10130357224758595], [0.10057024207778043], [0.10030753917891498], [0.2362829548641306], [0.5832661862190776], [0.10016952398794371], [0.2133295184657334], [0.4403423623734097], [0.3892754150306517], [0.21099097690486018], [0.6994529381859665], [0.20011868468917132], [0.10026172148440693], [0.3550471558366182]]}}}}
