# Supplementary material
Source: ML conference proceedings conference paper supplement (https://proceedings.neurips.cc/paper_files/paper/2022/hash/31a57804448363bcab777f818f75f5b4-Abstract.html)
Supplement: Supplementary file 1 [file 31a57804448363bcab777f818f75f5b4-Supplemental-Conference.zip › trading_off_resource_budgets_f-Supplementary Material/code_and_data/experiments/base_results/bo_20220228_124924_b7rkpeqg/suggest_log/01670d7b1fb457f598023dbb5ce259db.json]

{"meta": {"args": {"--uuid": "01670d7b1fb457f598023dbb5ce259db", "-db-root": "/home/damon_falck/blackboxbandits/experiments/saved_results", "--opt-root": "/home/damon_falck/blackboxbandits/experiments", "--data-root": "/home/damon_falck/blackboxbandits/experiments/penn_datasets", "--db": "bo_20220228_124924_b7rkpeqg", "--opt": "PySOT", "--data": "clf-new-thyroid", "--classifier": "lasso", "--metric": "nll", "--calls": 20, "--suggestions": 1, "--jobs-file": null, "--verbose": false, "dry_run": false, "rev": "bd14afd", "opt_rev": "0.3.3"}, "signature": [[{"C": 1.5676677195506077, "intercept_scaling": 7.257005721594282}, {"C": 2.57663857461359, "intercept_scaling": 1.5119336467641016}, {"C": 0.49501595537331966, "intercept_scaling": 3.833332156156665}, {"C": 0.5627932047415171, "intercept_scaling": 36.905577292137636}, {"C": 71.55682161754872, "intercept_scaling": 0.34179529120610125}], [0.15475392921649408, 0.14821575254205352, 0.2260990111855326, 0.20831325950313526, 0.21299236869327273]]},
"data": {"coords": {"iter": {"dims": ["iter"], "attrs": {}, "data": [0, 1, 2, 3, 4, 5, 6, 7, 8, 9, 10, 11, 12, 13, 14, 15, 16, 17, 18, 19]}, "suggestion": {"dims": ["suggestion"], "attrs": {}, "data": [0]}}, "attrs": {}, "dims": {"iter": 20, "suggestion": 1}, "data_vars": {"C": {"dims": ["iter", "suggestion"], "attrs": {}, "data": [[100.0], [15.848931924611165], [2.5118864315095815], [0.3981071705534977], [0.06309573444801937], [0.010000000000000005], [99.57324170876588], [9.339055240398343], [20.095690019651666], [5.623579433970495], [0.2266737582536981], [0.31442712345803764], [1.1686780076973458], [1.8716892396112335], [8.425415347282119], [1.3637264428933162], [4.115146442935667], [2.959230538037571], [29.057901279427675], [11.98765334229851]]}, "intercept_scaling": {"dims": ["iter", "suggestion"], "attrs": {}, "data": [[0.3981071705534977], [0.010000000000000005], [15.848931924611165], [0.06309573444801937], [100.0], [2.5118864315095815], [58.58994554160015], [1.3938791375193635], [13.114151621030452], [5.542465578988464], [2.534779162631474], [25.021967201279057], [3.53160914929719], [6.580288503014073], [93.31897703213662], [75.57393610189146], [41.21646843608301], [80.84094927154445], [63.695120516820424], [32.459367933277385]]}}}}
