# Supplementary material
Source: ML conference proceedings conference paper supplement (https://proceedings.neurips.cc/paper_files/paper/2022/hash/31a57804448363bcab777f818f75f5b4-Abstract.html)
Supplement: Supplementary file 1 [file 31a57804448363bcab777f818f75f5b4-Supplemental-Conference.zip › trading_off_resource_budgets_f-Supplementary Material/code_and_data/experiments/base_results/bo_20220228_124924_b7rkpeqg/suggest_log/01948a147fd659969d9ef892ed5ec241.json]

{"meta": {"args": {"--uuid": "01948a147fd659969d9ef892ed5ec241", "-db-root": "/home/damon_falck/blackboxbandits/experiments/saved_results", "--opt-root": "/home/damon_falck/blackboxbandits/experiments", "--data-root": "/home/damon_falck/blackboxbandits/experiments/penn_datasets", "--db": "bo_20220228_124924_b7rkpeqg", "--opt": "OpenTuner-BanditA", "--data": "reg-695-chatfield-4", "--classifier": "MLP-adam", "--metric": "mse", "--calls": 20, "--suggestions": 1, "--jobs-file": null, "--verbose": false, "dry_run": false, "rev": "bd14afd", "opt_rev": "0.8.7"}, "signature": [[{"alpha": 0.019628224813442792, "batch_size": 182, "beta_1": 0.9410202200271762, "beta_2": 0.9998021557676793, "epsilon": 1.8662266976518e-08, "hidden_layer_sizes": 147, "learning_rate_init": 0.0005627932047415167, "tol": 0.03690557729213761, "validation_fraction": 0.8846827852548593}, {"alpha": 0.001998246739232944, "batch_size": 200, "beta_1": 0.919111482530466, "beta_2": 0.9998488260436156, "epsilon": 5.981221901152555e-07, "hidden_layer_sizes": 61, "learning_rate_init": 2.2310905607443014e-05, "tol": 1.2046852412030316e-05, "validation_fraction": 0.8117896445826539}, {"alpha": 0.46659545670218433, "batch_size": 219, "beta_1": 0.9889789783750891, "beta_2": 0.9999896868093284, "epsilon": 2.4234724484675948e-08, "hidden_layer_sizes": 167, "learning_rate_init": 2.972334644335654e-05, "tol": 0.0036281404040243792, "validation_fraction": 0.17260651658522078}, {"alpha": 4.656005689076002, "batch_size": 135, "beta_1": 0.870503881627747, "beta_2": 0.9948873266941017, "epsilon": 2.1023308743480125e-07, "hidden_layer_sizes": 118, "learning_rate_init": 0.001878173875716191, "tol": 1.1889379831773006e-05, "validation_fraction": 0.6264327093752792}, {"alpha": 0.04705159350400542, "batch_size": 158, "beta_1": 0.9870884262730957, "beta_2": 0.9999596874382349, "epsilon": 1.1981845126013875e-08, "hidden_layer_sizes": 116, "learning_rate_init": 0.006173405204074311, "tol": 1.7414134181586194e-05, "validation_fraction": 0.6754299026638921}], [0.2841026195469352, 0.7446511566682528, 1.1674342820288244, 0.2245137289317077, 0.25491918207890785]]},
"data": {"coords": {"iter": {"dims": ["iter"], "attrs": {}, "data": [0, 1, 2, 3, 4, 5, 6, 7, 8, 9, 10, 11, 12, 13, 14, 15, 16, 17, 18, 19]}, "suggestion": {"dims": ["suggestion"], "attrs": {}, "data": [0]}}, "attrs": {}, "dims": {"iter": 20, "suggestion": 1}, "data_vars": {"alpha": {"dims": ["iter", "suggestion"], "attrs": {}, "data": [[5.122610872573234], [5.122610872573234], [0.9469142811398789], [5.02278876620501], [0.9025974031402199], [0.2807415630889409], [0.5122064515407755], [0.2200728409058989], [4.368003190301302], [0.6300365847819281], [5.061304313685791], [3.1599542106945235], [0.9456805547191866], [1.1654790598854516], [2.302994205980106], [4.823532945517234], [2.1410814042789488], [4.368003190301302], [5.019584492251979], [4.441122350449012]]}, "batch_size": {"dims": ["iter", "suggestion"], "attrs": {}, "data": [[84], [84], [229], [84], [207], [230], [116], [192], [45], [115], [183], [163], [18], [124], [94], [220], [168], [45], [45], [140]]}, "beta_1": {"dims": ["iter", "suggestion"], "attrs": {}, "data": [[0.8389904407243987], [0.5535346853047517], [0.7485626287091063], [0.862275712270029], [0.5036864914346989], [0.9005340440931807], [0.7629392526468397], [0.7461105869998796], [0.5143104785755654], [0.867576994013826], [0.8368346554667152], [0.8364471687256995], [0.5878438824154772], [0.8589307293867043], [0.8580176511322668], [0.5218352906747429], [0.7441070577394469], [0.5143104785755654], [0.5143104785755654], [0.8558931232160509]]}, "beta_2": {"dims": ["iter", "suggestion"], "attrs": {}, "data": [[0.9578343285285001], [0.9578343285285001], [0.9551502259980158], [0.9728350395115645], [0.980469956853304], [0.9663127270380827], [0.9105733376038254], [0.9175968915464827], [0.9469865575212665], [0.9418600054363774], [0.9763219847989578], [0.9897468056860655], [0.9312843061891826], [0.9779336076971917], [0.9892419588214585], [0.9354889958969581], [0.9928887668745954], [0.9469865575212665], [0.9469865575212665], [0.9628512651531068]]}, "epsilon": {"dims": ["iter", "suggestion"], "attrs": {}, "data": [[7.168330443957084e-07], [7.168330443957084e-07], [1.4029825515290872e-07], [7.168330443957084e-07], [2.875689934239413e-07], [2.2208064734460697e-07], [3.864346604104109e-07], [1.5981606621944365e-08], [9.745907502417263e-07], [7.788456989626647e-07], [7.479981073704446e-07], [1.4054214916900298e-07], [7.51813797356642e-07], [2.4069497076059556e-07], [2.2211488839904325e-07], [1.5163047564822795e-07], [8.955473175536733e-07], [9.745907502417263e-07], [9.745907502417263e-07], [2.109879348183009e-07]]}, "hidden_layer_sizes": {"dims": ["iter", "suggestion"], "attrs": {}, "data": [[150], [150], [51], [158], [58], [171], [65], [78], [113], [142], [168], [61], [109], [62], [71], [107], [139], [113], [113], [130]]}, "learning_rate_init": {"dims": ["iter", "suggestion"], "attrs": {}, "data": [[0.034644966235777445], [0.034644966235777445], [0.05637748979547801], [0.034644966235777445], [0.004461013567181805], [0.082316533622434], [0.07333031226846425], [0.07966929728826237], [0.013746839109244725], [0.08025852694773465], [0.07052587342230814], [0.011718712180432456], [0.00331301105457087], [0.0696395571776988], [0.09131492614989394], [0.03845390362041628], [0.0056370136392280175], [0.0891320456306161], [0.013746839109244725], [0.02876995250933383]]}, "tol": {"dims": ["iter", "suggestion"], "attrs": {}, "data": [[0.07663110617701789], [0.07663110617701789], [0.09009622934570365], [0.07663110617701789], [0.09481202410867333], [0.08293678600025849], [0.05543071657136405], [0.024629399136012187], [0.028911915633030128], [0.009374246333611436], [0.021542174249144553], [0.07722313940650986], [0.07669251912699952], [0.05498088827749597], [0.03578785464701644], [0.08317928942614843], [0.07196996352959643], [0.08401348887489195], [0.0347881733993906], [0.08550544174008194]]}, "validation_fraction": {"dims": ["iter", "suggestion"], "attrs": {}, "data": [[0.7221596711328943], [0.7221596711328943], [0.805685751006188], [0.7221596711328943], [0.4404316996234846], [0.11208892188263367], [0.27830040654408705], [0.46911350011357766], [0.521055481532477], [0.8786613635517527], [0.7504241896028596], [0.5615493569782665], [0.6391842710835582], [0.4811981056106469], [0.40396801589088904], [0.11927475079696565], [0.4974836775248024], [0.521055481532477], [0.5020713953586544], [0.6429078343181746]]}}}}
