# Supplementary material
Source: ML conference proceedings conference paper supplement (https://proceedings.neurips.cc/paper_files/paper/2022/hash/31a57804448363bcab777f818f75f5b4-Abstract.html)
Supplement: Supplementary file 1 [file 31a57804448363bcab777f818f75f5b4-Supplemental-Conference.zip › trading_off_resource_budgets_f-Supplementary Material/code_and_data/experiments/base_results/bo_20220228_124924_b7rkpeqg/suggest_log/01968bb8152753f6be1006706d71e1cb.json]

{"meta": {"args": {"--uuid": "01968bb8152753f6be1006706d71e1cb", "-db-root": "/home/damon_falck/blackboxbandits/experiments/saved_results", "--opt-root": "/home/damon_falck/blackboxbandits/experiments", "--data-root": "/home/damon_falck/blackboxbandits/experiments/penn_datasets", "--db": "bo_20220228_124924_b7rkpeqg", "--opt": "Scikit-GBRT-Hedge", "--data": "clf-cmc", "--classifier": "lasso", "--metric": "nll", "--calls": 20, "--suggestions": 1, "--jobs-file": null, "--verbose": false, "dry_run": false, "rev": "bd14afd", "opt_rev": "0.9.0"}, "signature": [[{"C": 1.5676677195506077, "intercept_scaling": 7.257005721594282}, {"C": 2.57663857461359, "intercept_scaling": 1.5119336467641016}, {"C": 0.49501595537331966, "intercept_scaling": 3.833332156156665}, {"C": 0.5627932047415171, "intercept_scaling": 36.905577292137636}, {"C": 71.55682161754872, "intercept_scaling": 0.34179529120610125}], [0.9699552934287652, 0.9703502677983163, 0.969834205100575, 0.9697185039702519, 0.9713562775501524]]},
"data": {"coords": {"iter": {"dims": ["iter"], "attrs": {}, "data": [0, 1, 2, 3, 4, 5, 6, 7, 8, 9, 10, 11, 12, 13, 14, 15, 16, 17, 18, 19]}, "suggestion": {"dims": ["suggestion"], "attrs": {}, "data": [0]}}, "attrs": {}, "dims": {"iter": 20, "suggestion": 1}, "data_vars": {"C": {"dims": ["iter", "suggestion"], "attrs": {}, "data": [[11.070556112166358], [15.00714721276391], [19.675898723602455], [6.767193513751039], [0.5372102161330661], [0.09431172131341975], [0.24362181673829889], [0.03983210463979726], [0.014981536587102712], [0.016172012812961257], [0.014731911420842818], [0.012007332388838506], [1.712616610499558], [0.7079414865551618], [0.4692349080616275], [0.23390103577756294], [0.4010505288991981], [0.18958318068145658], [0.010899509741664547], [0.010490306904172698]]}, "intercept_scaling": {"dims": ["iter", "suggestion"], "attrs": {}, "data": [[0.9549698612946671], [0.13738202592662654], [11.068245396107224], [7.684593211057467], [3.597219658567262], [2.5278852452770746], [4.052122245222997], [5.1966455903144695], [3.8018338342433795], [7.102116732110984], [0.15727359021332385], [7.662107513069856], [3.1614291954711127], [5.371688004136094], [5.25401958893941], [4.718353565446639], [5.243341855265259], [6.470052512679355], [5.426332805192175], [3.9301540205929055]]}}}}
