# Supplementary material
Source: ML conference proceedings conference paper supplement (https://proceedings.neurips.cc/paper_files/paper/2022/hash/31a57804448363bcab777f818f75f5b4-Abstract.html)
Supplement: Supplementary file 1 [file 31a57804448363bcab777f818f75f5b4-Supplemental-Conference.zip › trading_off_resource_budgets_f-Supplementary Material/code_and_data/experiments/base_results/bo_20220228_124924_b7rkpeqg/suggest_log/03461ce84c975f358b184847e88d64b3.json]

{"meta": {"args": {"--uuid": "03461ce84c975f358b184847e88d64b3", "-db-root": "/home/damon_falck/blackboxbandits/experiments/saved_results", "--opt-root": "/home/damon_falck/blackboxbandits/experiments", "--data-root": "/home/damon_falck/blackboxbandits/experiments/penn_datasets", "--db": "bo_20220228_124924_b7rkpeqg", "--opt": "HyperOpt", "--data": "clf-mfeat-karhunen", "--classifier": "lasso", "--metric": "nll", "--calls": 20, "--suggestions": 1, "--jobs-file": null, "--verbose": false, "dry_run": false, "rev": "bd14afd", "opt_rev": "0.2.7"}, "signature": [[{"C": 1.5676677195506077, "intercept_scaling": 7.257005721594282}, {"C": 2.57663857461359, "intercept_scaling": 1.5119336467641016}, {"C": 0.49501595537331966, "intercept_scaling": 3.833332156156665}, {"C": 0.5627932047415171, "intercept_scaling": 36.905577292137636}, {"C": 71.55682161754872, "intercept_scaling": 0.34179529120610125}], [0.28676209921031953, 0.31956014141197486, 0.25084690734429727, 0.24825523338388628, 0.9710088210510849]]},
"data": {"coords": {"iter": {"dims": ["iter"], "attrs": {}, "data": [0, 1, 2, 3, 4, 5, 6, 7, 8, 9, 10, 11, 12, 13, 14, 15, 16, 17, 18, 19]}, "suggestion": {"dims": ["suggestion"], "attrs": {}, "data": [0]}}, "attrs": {}, "dims": {"iter": 20, "suggestion": 1}, "data_vars": {"C": {"dims": ["iter", "suggestion"], "attrs": {}, "data": [[0.5326374237545182], [32.71263805586859], [31.065074699996536], [0.012330551843456636], [1.0331658269924466], [2.253511579181872], [21.817710751599282], [2.6862906463153506], [0.024938481838304886], [0.09154394547763657], [21.73068115540685], [27.348739590379534], [0.13214730371356526], [2.7423152503317096], [37.91250210945988], [3.794041769160121], [0.04934241948354763], [0.044129223615011856], [0.6244726630909605], [13.529113967092274]]}, "intercept_scaling": {"dims": ["iter", "suggestion"], "attrs": {}, "data": [[0.0311023178776564], [0.11913235124352135], [0.1299440466243135], [0.5146037145432211], [0.06389189979441771], [1.106845867659568], [0.012514201287495265], [0.16883176897486585], [0.02664694029474282], [0.32093912116144996], [0.01663525723289246], [0.028511000081160347], [0.10260449247648706], [0.3742516284994279], [0.2543597468360428], [0.018440971704206614], [1.2401225173349482], [1.2285499224008736], [28.60075459717057], [8.767056622730097]]}}}}
