# Supplementary material
Source: ML conference proceedings conference paper supplement (https://proceedings.neurips.cc/paper_files/paper/2022/hash/31a57804448363bcab777f818f75f5b4-Abstract.html)
Supplement: Supplementary file 1 [file 31a57804448363bcab777f818f75f5b4-Supplemental-Conference.zip › trading_off_resource_budgets_f-Supplementary Material/code_and_data/experiments/base_results/bo_20220228_124924_b7rkpeqg/suggest_log/004108c85b14513db9cf8a48c24ccdbc.json]

{"meta": {"args": {"--uuid": "004108c85b14513db9cf8a48c24ccdbc", "-db-root": "/home/damon_falck/blackboxbandits/experiments/saved_results", "--opt-root": "/home/damon_falck/blackboxbandits/experiments", "--data-root": "/home/damon_falck/blackboxbandits/experiments/penn_datasets", "--db": "bo_20220228_124924_b7rkpeqg", "--opt": "HyperOpt", "--data": "clf-ring", "--classifier": "MLP-adam", "--metric": "nll", "--calls": 20, "--suggestions": 1, "--jobs-file": null, "--verbose": false, "dry_run": false, "rev": "bd14afd", "opt_rev": "0.2.7"}, "signature": [[{"alpha": 0.019628224813442792, "batch_size": 182, "beta_1": 0.9410202200271762, "beta_2": 0.9998021557676793, "epsilon": 1.8662266976518e-08, "hidden_layer_sizes": 147, "learning_rate_init": 0.0005627932047415167, "tol": 0.03690557729213761, "validation_fraction": 0.8846827852548593}, {"alpha": 0.001998246739232944, "batch_size": 200, "beta_1": 0.919111482530466, "beta_2": 0.9998488260436156, "epsilon": 5.981221901152555e-07, "hidden_layer_sizes": 61, "learning_rate_init": 2.2310905607443014e-05, "tol": 1.2046852412030316e-05, "validation_fraction": 0.8117896445826539}, {"alpha": 0.46659545670218433, "batch_size": 219, "beta_1": 0.9889789783750891, "beta_2": 0.9999896868093284, "epsilon": 2.4234724484675948e-08, "hidden_layer_sizes": 167, "learning_rate_init": 2.972334644335654e-05, "tol": 0.0036281404040243792, "validation_fraction": 0.17260651658522078}, {"alpha": 4.656005689076002, "batch_size": 135, "beta_1": 0.870503881627747, "beta_2": 0.9948873266941017, "epsilon": 2.1023308743480125e-07, "hidden_layer_sizes": 118, "learning_rate_init": 0.001878173875716191, "tol": 1.1889379831773006e-05, "validation_fraction": 0.6264327093752792}, {"alpha": 0.04705159350400542, "batch_size": 158, "beta_1": 0.9870884262730957, "beta_2": 0.9999596874382349, "epsilon": 1.1981845126013875e-08, "hidden_layer_sizes": 116, "learning_rate_init": 0.006173405204074311, "tol": 1.7414134181586194e-05, "validation_fraction": 0.6754299026638921}], [0.5326661649974527, 0.6343793546245629, 0.5021881649090159, 0.447026570414752, 0.12497928335336142]]},
"data": {"coords": {"iter": {"dims": ["iter"], "attrs": {}, "data": [0, 1, 2, 3, 4, 5, 6, 7, 8, 9, 10, 11, 12, 13, 14, 15, 16, 17, 18, 19]}, "suggestion": {"dims": ["suggestion"], "attrs": {}, "data": [0]}}, "attrs": {}, "dims": {"iter": 20, "suggestion": 1}, "data_vars": {"alpha": {"dims": ["iter", "suggestion"], "attrs": {}, "data": [[0.008386530629403066], [2.2175702336397594e-05], [1.6052606093496736e-05], [0.6630777612069712], [0.004626406353649164], [0.004359962380839646], [0.06013100720442665], [0.0015646593278969363], [1.684985338162344e-05], [0.3458588234275882], [1.1550859307376311e-05], [0.00020427357514684943], [0.03599989240766731], [9.705320831704697e-05], [0.0007591984153835962], [0.11708365443694993], [0.00018148978834838758], [0.0006198540079681067], [0.00024328981149573898], [0.0018540061253600085]]}, "batch_size": {"dims": ["iter", "suggestion"], "attrs": {}, "data": [[131], [211], [19], [112], [170], [206], [138], [60], [135], [215], [163], [120], [67], [63], [34], [11], [162], [24], [217], [13]]}, "beta_1": {"dims": ["iter", "suggestion"], "attrs": {}, "data": [[0.8946333298056319], [0.5278853873296007], [0.7041699724358229], [0.8961426595888187], [0.7458851120047507], [0.7200452323467694], [0.5157054330767822], [0.5037453394162608], [0.92373949053459], [0.9840704930987135], [0.9761726198045027], [0.5382396082210686], [0.6701026308471941], [0.6454391363844614], [0.974151856845723], [0.6038762512566153], [0.6427702654693672], [0.5154349959998903], [0.8148923531339649], [0.7133708051658629]]}, "beta_2": {"dims": ["iter", "suggestion"], "attrs": {}, "data": [[0.996304955179709], [0.9214621672644333], [0.985505532061093], [0.9714470548650059], [0.9114966114257588], [0.9913994387142276], [0.9626734094612535], [0.9471564164258299], [0.9284378930532184], [0.9371596828344698], [0.9687052300235313], [0.9460345916833905], [0.9146783120705274], [0.9979793411687252], [0.9729294858664145], [0.9011413299748219], [0.9781148160793988], [0.9551652052141711], [0.9016793287172118], [0.9301476141401567]]}, "epsilon": {"dims": ["iter", "suggestion"], "attrs": {}, "data": [[1.914875248005168e-08], [9.197042690131814e-07], [4.021658344510547e-07], [2.9642583123639507e-07], [4.4104428967024153e-07], [3.725239001405505e-08], [9.047566880743125e-08], [1.0957993436881215e-09], [5.323139471395191e-09], [5.5356417100568816e-09], [7.139877108872166e-07], [7.997573620083014e-08], [1.746787659837836e-09], [3.2735572166389745e-09], [2.2064864617939953e-07], [1.8948218536704846e-09], [3.013851333012156e-07], [4.794127697867131e-09], [2.8909293491383754e-07], [2.1832760166736693e-09]]}, "hidden_layer_sizes": {"dims": ["iter", "suggestion"], "attrs": {}, "data": [[108], [165], [69], [165], [108], [184], [75], [88], [137], [64], [67], [90], [193], [138], [69], [71], [159], [190], [197], [155]]}, "learning_rate_init": {"dims": ["iter", "suggestion"], "attrs": {}, "data": [[0.00015160117633910696], [0.00024125677966586648], [0.00018401760491045628], [0.0015619684539700644], [1.2232696483189792e-05], [0.00017936475338658977], [0.00014563928975071334], [0.0010050707516543625], [0.005728697149127539], [0.0018910002172821947], [0.08674294506902103], [0.005397428058461416], [0.0016584304258216239], [0.001764479316812854], [0.00020129988646152433], [0.014721564897688378], [0.0028152781025779002], [0.0001782223805497685], [0.006496220822637404], [0.00018745951364949157]]}, "tol": {"dims": ["iter", "suggestion"], "attrs": {}, "data": [[0.0006730449619824714], [0.0025108893571193715], [0.00016884048169402456], [0.0005235655338498193], [0.000546335860477713], [0.03712397570932291], [1.4266003655240666e-05], [0.015716363882202503], [0.0005206447023557906], [0.029670956854438702], [0.00010377305822123642], [0.0017508231609784026], [0.021029634171832443], [1.2165535186097546e-05], [9.837894768430791e-05], [0.00622480230879363], [0.0003638592377031573], [0.00014070422088989442], [0.07544421124319464], [0.019835157374130392]]}, "validation_fraction": {"dims": ["iter", "suggestion"], "attrs": {}, "data": [[0.48494095052056513], [0.20003329962424754], [0.1209271198933019], [0.4456825391813206], [0.8808226649663808], [0.18391402705615528], [0.2850023439590311], [0.13147396960326022], [0.11416262363029896], [0.771968131880143], [0.19932606779033482], [0.20972080982386088], [0.34937450686749455], [0.33522767173537543], [0.535902638699384], [0.6450249592309792], [0.7469880158610811], [0.1022610420977524], [0.5823484216267233], [0.24468269014130317]]}}}}
