# Supplementary material
Source: ML conference proceedings conference paper supplement (https://proceedings.neurips.cc/paper_files/paper/2022/hash/31a57804448363bcab777f818f75f5b4-Abstract.html)
Supplement: Supplementary file 1 [file 31a57804448363bcab777f818f75f5b4-Supplemental-Conference.zip › trading_off_resource_budgets_f-Supplementary Material/code_and_data/experiments/base_results/bo_20220228_124924_b7rkpeqg/suggest_log/05111c07708b50dc87be539e08784937.json]

{"meta": {"args": {"--uuid": "05111c07708b50dc87be539e08784937", "-db-root": "/home/damon_falck/blackboxbandits/experiments/saved_results", "--opt-root": "/home/damon_falck/blackboxbandits/experiments", "--data-root": "/home/damon_falck/blackboxbandits/experiments/penn_datasets", "--db": "bo_20220228_124924_b7rkpeqg", "--opt": "Scikit-GBRT-Hedge", "--data": "reg-627-fri-c2-500-10", "--classifier": "MLP-adam", "--metric": "mse", "--calls": 20, "--suggestions": 1, "--jobs-file": null, "--verbose": false, "dry_run": false, "rev": "bd14afd", "opt_rev": "0.9.0"}, "signature": [[{"alpha": 0.019628224813442792, "batch_size": 182, "beta_1": 0.9410202200271762, "beta_2": 0.9998021557676793, "epsilon": 1.8662266976518e-08, "hidden_layer_sizes": 147, "learning_rate_init": 0.0005627932047415167, "tol": 0.03690557729213761, "validation_fraction": 0.8846827852548593}, {"alpha": 0.001998246739232944, "batch_size": 200, "beta_1": 0.919111482530466, "beta_2": 0.9998488260436156, "epsilon": 5.981221901152555e-07, "hidden_layer_sizes": 61, "learning_rate_init": 2.2310905607443014e-05, "tol": 1.2046852412030316e-05, "validation_fraction": 0.8117896445826539}, {"alpha": 0.46659545670218433, "batch_size": 219, "beta_1": 0.9889789783750891, "beta_2": 0.9999896868093284, "epsilon": 2.4234724484675948e-08, "hidden_layer_sizes": 167, "learning_rate_init": 2.972334644335654e-05, "tol": 0.0036281404040243792, "validation_fraction": 0.17260651658522078}, {"alpha": 4.656005689076002, "batch_size": 135, "beta_1": 0.870503881627747, "beta_2": 0.9948873266941017, "epsilon": 2.1023308743480125e-07, "hidden_layer_sizes": 118, "learning_rate_init": 0.001878173875716191, "tol": 1.1889379831773006e-05, "validation_fraction": 0.6264327093752792}, {"alpha": 0.04705159350400542, "batch_size": 158, "beta_1": 0.9870884262730957, "beta_2": 0.9999596874382349, "epsilon": 1.1981845126013875e-08, "hidden_layer_sizes": 116, "learning_rate_init": 0.006173405204074311, "tol": 1.7414134181586194e-05, "validation_fraction": 0.6754299026638921}], [0.8970295064346224, 1.2594107865628665, 0.9962317073023119, 0.7532806780495248, 0.7516013595459631]]},
"data": {"coords": {"iter": {"dims": ["iter"], "attrs": {}, "data": [0, 1, 2, 3, 4, 5, 6, 7, 8, 9, 10, 11, 12, 13, 14, 15, 16, 17, 18, 19]}, "suggestion": {"dims": ["suggestion"], "attrs": {}, "data": [0]}}, "attrs": {}, "dims": {"iter": 20, "suggestion": 1}, "data_vars": {"alpha": {"dims": ["iter", "suggestion"], "attrs": {}, "data": [[0.0578686695534984], [0.002252989403424616], [4.35285745744219], [0.9164596146632393], [1.5523179630453812e-05], [0.6485611934957621], [1.8764603052907927], [0.09036518226984348], [6.487116829878237], [0.0029452451538963874], [0.0755763567185535], [0.003478647260263606], [5.474626569138906], [0.06806321449116937], [1.4219128796259037e-05], [1.9344514213446102], [1.2099577923802491], [5.071035408581506], [2.680286979709954], [1.4292562959467603]]}, "batch_size": {"dims": ["iter", "suggestion"], "attrs": {}, "data": [[187], [135], [35], [54], [163], [198], [88], [110], [201], [78], [77], [189], [57], [76], [66], [149], [196], [49], [234], [98]]}, "beta_1": {"dims": ["iter", "suggestion"], "attrs": {}, "data": [[0.5728486813242317], [0.8088255256093282], [0.5580788002369332], [0.5199525927715117], [0.9334348814744222], [0.5120206941377564], [0.7833808515051347], [0.6390819147288339], [0.7199372784480068], [0.5526846545254442], [0.6949836472912571], [0.810780363517053], [0.5692851575621038], [0.9459580291251297], [0.9405436302068271], [0.9735638208952142], [0.9721960769510812], [0.9452859546986636], [0.9494421444388152], [0.9837403821910076]]}, "beta_2": {"dims": ["iter", "suggestion"], "attrs": {}, "data": [[0.9240955128475409], [0.9589293400615888], [0.9392251243050327], [0.9171466087858501], [0.9386377752247578], [0.9700991333484534], [0.9182084368705007], [0.9019953475554638], [0.9039061799651419], [0.9015677249556593], [0.9116992544818515], [0.9642238900137959], [0.9187884731019855], [0.9155285330694722], [0.9585198677078121], [0.914147711422795], [0.9919209680315979], [0.9902935859255438], [0.9937494982275653], [0.9640486372924926]]}, "epsilon": {"dims": ["iter", "suggestion"], "attrs": {}, "data": [[2.7798727821188126e-09], [1.0951701624012966e-07], [1.200231378541554e-08], [3.889056378317655e-09], [7.266906125789466e-08], [1.7496321456902483e-07], [2.5312773944809905e-09], [3.596260015669368e-08], [1.9960674869207086e-08], [2.1179494662662685e-09], [2.190938212913915e-09], [3.105196495312558e-09], [3.053491276487627e-07], [1.5068194297317517e-08], [2.91387796972978e-07], [9.442395864563861e-07], [2.3476251780961215e-09], [5.942605495028355e-07], [1.644118762620232e-07], [1.8652891535016735e-09]]}, "hidden_layer_sizes": {"dims": ["iter", "suggestion"], "attrs": {}, "data": [[50], [151], [70], [60], [148], [55], [103], [50], [126], [100], [60], [55], [60], [51], [179], [68], [76], [51], [153], [103]]}, "learning_rate_init": {"dims": ["iter", "suggestion"], "attrs": {}, "data": [[1.6449127928385626e-05], [0.002319515242013175], [0.05972992044170664], [0.005169110415858238], [0.00125918551008841], [3.977239805854023e-05], [0.002352345829479866], [0.04467471440623807], [1.0533115871635748e-05], [0.028716169761888677], [1.989403279676468e-05], [0.019544884205266896], [0.09948512257294036], [0.04492323502894237], [1.4178241147580937e-05], [0.09383800728392687], [0.04897114617604687], [0.05560357866742298], [0.008221690120358614], [0.07017229528670078]]}, "tol": {"dims": ["iter", "suggestion"], "attrs": {}, "data": [[0.022346003621207016], [3.465488100212209e-05], [0.00012858692221569748], [0.006577807584726802], [0.0186696945603409], [0.055141914377777795], [0.00037501411629637613], [0.0026002261880859936], [0.041197666734289574], [0.003718828217742354], [0.016433725132343535], [0.04390861637019266], [0.010067731752940335], [0.0007057428692709548], [0.00044211204675933326], [7.307076198390054e-05], [0.00011060081384958632], [0.0017318338376290199], [0.0024066645693686596], [3.7666048225089424e-05]]}, "validation_fraction": {"dims": ["iter", "suggestion"], "attrs": {}, "data": [[0.1162934830804481], [0.6106175570316217], [0.10156889399022469], [0.5363744910824088], [0.19515362677379988], [0.6471232305531851], [0.6610747125843742], [0.4675559625811584], [0.31619144972773894], [0.633202517626643], [0.12777773948874738], [0.10946959699691403], [0.5090354932504961], [0.47940853776501835], [0.4497634349215443], [0.2881742408161334], [0.14162332122104693], [0.37296670667656234], [0.13961463388614756], [0.5924649489742709]]}}}}
