# Supplementary material
Source: ML conference proceedings conference paper supplement (https://proceedings.neurips.cc/paper_files/paper/2022/hash/31a57804448363bcab777f818f75f5b4-Abstract.html)
Supplement: Supplementary file 1 [file 31a57804448363bcab777f818f75f5b4-Supplemental-Conference.zip › trading_off_resource_budgets_f-Supplementary Material/code_and_data/experiments/base_results/bo_20220228_124924_b7rkpeqg/suggest_log/05471bd2d85e516cb9657d1b1caffbc6.json]

{"meta": {"args": {"--uuid": "05471bd2d85e516cb9657d1b1caffbc6", "-db-root": "/home/damon_falck/blackboxbandits/experiments/saved_results", "--opt-root": "/home/damon_falck/blackboxbandits/experiments", "--data-root": "/home/damon_falck/blackboxbandits/experiments/penn_datasets", "--db": "bo_20220228_124924_b7rkpeqg", "--opt": "Scikit-GP-LCB", "--data": "reg-656-fri-c1-100-5", "--classifier": "lasso", "--metric": "mse", "--calls": 20, "--suggestions": 1, "--jobs-file": null, "--verbose": false, "dry_run": false, "rev": "bd14afd", "opt_rev": "0.9.0"}, "signature": [[{"alpha": 1.5676677195506077, "fit_intercept": true, "max_iter": 423, "normalize": true, "positive": false, "tol": 0.0038333321561566623}, {"alpha": 0.5627932047415171, "fit_intercept": true, "max_iter": 3989, "normalize": false, "positive": true, "tol": 0.001304907355036239}, {"alpha": 1.871450068624068, "fit_intercept": true, "max_iter": 16, "normalize": false, "positive": false, "tol": 0.021403233140986057}, {"alpha": 12.960656597279737, "fit_intercept": true, "max_iter": 4378, "normalize": true, "positive": false, "tol": 0.013246974647468445}, {"alpha": 0.029723346443356558, "fit_intercept": true, "max_iter": 24, "normalize": true, "positive": true, "tol": 0.00045566719139214756}], [0.7919040830976353, 0.7919040830976353, 0.7919040830976353, 0.7919040830976353, 0.7863803875606331]]},
"data": {"coords": {"iter": {"dims": ["iter"], "attrs": {}, "data": [0, 1, 2, 3, 4, 5, 6, 7, 8, 9, 10, 11, 12, 13, 14, 15, 16, 17, 18, 19]}, "suggestion": {"dims": ["suggestion"], "attrs": {}, "data": [0]}}, "attrs": {}, "dims": {"iter": 20, "suggestion": 1}, "data_vars": {"alpha": {"dims": ["iter", "suggestion"], "attrs": {}, "data": [[0.049222019017951625], [0.013951944301978186], [2.0232574054051558], [3.677911637169399], [4.382917001749363], [0.01], [0.9290894731400019], [0.05317670428361608], [0.01], [14.698720214027576], [0.022190266794578212], [0.02457351389458976], [0.014132791763804955], [0.013467425582336589], [0.013190773727761401], [0.01], [0.017922533957311474], [0.014055460126631846], [0.016057045178106293], [0.027977326070434325]]}, "fit_intercept": {"dims": ["iter", "suggestion"], "attrs": {}, "data": [[1], [0], [1], [1], [0], [0], [0], [0], [0], [0], [0], [0], [0], [0], [0], [0], [0], [0], [0], [0]]}, "max_iter": {"dims": ["iter", "suggestion"], "attrs": {}, "data": [[1763], [1821], [72], [2059], [1274], [5000], [5000], [10], [10], [5000], [10], [5000], [10], [5000], [10], [10], [10], [5000], [5000], [5000]]}, "normalize": {"dims": ["iter", "suggestion"], "attrs": {}, "data": [[1], [0], [1], [0], [0], [1], [0], [0], [0], [1], [0], [1], [0], [0], [1], [0], [0], [0], [1], [0]]}, "positive": {"dims": ["iter", "suggestion"], "attrs": {}, "data": [[0], [1], [1], [0], [1], [0], [1], [0], [1], [0], [0], [0], [0], [0], [0], [0], [0], [0], [0], [0]]}, "tol": {"dims": ["iter", "suggestion"], "attrs": {}, "data": [[0.0015731857848799232], [0.0008567336605434318], [0.0008695153149234567], [0.00849497093904391], [0.000989798870893555], [0.1], [1e-05], [0.1], [0.03744374440844681], [0.00031086393005642064], [1e-05], [0.1], [0.1], [1e-05], [1e-05], [1e-05], [0.1], [0.1], [1e-05], [1e-05]]}}}}
