# Supplementary material
Source: ML conference proceedings conference paper supplement (https://proceedings.neurips.cc/paper_files/paper/2022/hash/31a57804448363bcab777f818f75f5b4-Abstract.html)
Supplement: Supplementary file 1 [file 31a57804448363bcab777f818f75f5b4-Supplemental-Conference.zip › trading_off_resource_budgets_f-Supplementary Material/code_and_data/experiments/base_results/bo_20220228_124924_b7rkpeqg/suggest_log/07000cc6710459698f6b36f04b3cd4c2.json]

{"meta": {"args": {"--uuid": "07000cc6710459698f6b36f04b3cd4c2", "-db-root": "/home/damon_falck/blackboxbandits/experiments/saved_results", "--opt-root": "/home/damon_falck/blackboxbandits/experiments", "--data-root": "/home/damon_falck/blackboxbandits/experiments/penn_datasets", "--db": "bo_20220228_124924_b7rkpeqg", "--opt": "OpenTuner-GA-DE", "--data": "clf-dermatology", "--classifier": "lasso", "--metric": "nll", "--calls": 20, "--suggestions": 1, "--jobs-file": null, "--verbose": false, "dry_run": false, "rev": "bd14afd", "opt_rev": "0.8.7"}, "signature": [[{"C": 1.5676677195506077, "intercept_scaling": 7.257005721594282}, {"C": 2.57663857461359, "intercept_scaling": 1.5119336467641016}, {"C": 0.49501595537331966, "intercept_scaling": 3.833332156156665}, {"C": 0.5627932047415171, "intercept_scaling": 36.905577292137636}, {"C": 71.55682161754872, "intercept_scaling": 0.34179529120610125}], [0.18160788270747275, 0.1836387369017712, 0.2431957641661462, 0.22488221980715545, 0.21836658459431826]]},
"data": {"coords": {"iter": {"dims": ["iter"], "attrs": {}, "data": [0, 1, 2, 3, 4, 5, 6, 7, 8, 9, 10, 11, 12, 13, 14, 15, 16, 17, 18, 19]}, "suggestion": {"dims": ["suggestion"], "attrs": {}, "data": [0]}}, "attrs": {}, "dims": {"iter": 20, "suggestion": 1}, "data_vars": {"C": {"dims": ["iter", "suggestion"], "attrs": {}, "data": [[20.468575819592058], [1.587037834379254], [40.06023103931247], [3.780423945205343], [3.780423945205343], [9.392342536320193], [3.48037065158901], [1.0021592015770175], [0.21413612277940386], [0.635846325204062], [5.439972799440401], [11.148452978746008], [0.9944268520098964], [83.87653619477963], [5.439972799440401], [5.364659954078007], [0.4784181151382494], [1.7197241425290046], [2.7072369327982866], [5.439972799440401]]}, "intercept_scaling": {"dims": ["iter", "suggestion"], "attrs": {}, "data": [[4.774442839833889], [7.342422779891974], [4.774442839833889], [4.774442839833889], [0.43111180518165026], [62.44118795982139], [4.774442839833889], [0.5870001186099199], [4.058953695912135], [9.9615243423349], [4.774442839833889], [4.774442839833889], [0.07587031674461352], [21.38117733796613], [1.7225842304751848], [4.774442839833889], [19.85448045921326], [4.774442839833889], [34.97048640799973], [4.92369039780461]]}}}}
