# Supplementary material
Source: ML conference proceedings conference paper supplement (https://proceedings.neurips.cc/paper_files/paper/2022/hash/31a57804448363bcab777f818f75f5b4-Abstract.html)
Supplement: Supplementary file 1 [file 31a57804448363bcab777f818f75f5b4-Supplemental-Conference.zip › trading_off_resource_budgets_f-Supplementary Material/code_and_data/experiments/base_results/bo_20220228_124924_b7rkpeqg/suggest_log/08478f2f5f60576c85e261a837c1928c.json]

{"meta": {"args": {"--uuid": "08478f2f5f60576c85e261a837c1928c", "-db-root": "/home/damon_falck/blackboxbandits/experiments/saved_results", "--opt-root": "/home/damon_falck/blackboxbandits/experiments", "--data-root": "/home/damon_falck/blackboxbandits/experiments/penn_datasets", "--db": "bo_20220228_124924_b7rkpeqg", "--opt": "Scikit-GP-Hedge", "--data": "reg-197-cpu-act", "--classifier": "lasso", "--metric": "mse", "--calls": 20, "--suggestions": 1, "--jobs-file": null, "--verbose": false, "dry_run": false, "rev": "bd14afd", "opt_rev": "0.9.0"}, "signature": [[{"alpha": 1.5676677195506077, "fit_intercept": true, "max_iter": 423, "normalize": true, "positive": false, "tol": 0.0038333321561566623}, {"alpha": 0.5627932047415171, "fit_intercept": true, "max_iter": 3989, "normalize": false, "positive": true, "tol": 0.001304907355036239}, {"alpha": 1.871450068624068, "fit_intercept": true, "max_iter": 16, "normalize": false, "positive": false, "tol": 0.021403233140986057}, {"alpha": 12.960656597279737, "fit_intercept": true, "max_iter": 4378, "normalize": true, "positive": false, "tol": 0.013246974647468445}, {"alpha": 0.029723346443356558, "fit_intercept": true, "max_iter": 24, "normalize": true, "positive": true, "tol": 0.00045566719139214756}], [3.0561122972803973, 1.815207631742129, 0.681533285588009, 3.0561122972803973, 3.0561122972803973]]},
"data": {"coords": {"iter": {"dims": ["iter"], "attrs": {}, "data": [0, 1, 2, 3, 4, 5, 6, 7, 8, 9, 10, 11, 12, 13, 14, 15, 16, 17, 18, 19]}, "suggestion": {"dims": ["suggestion"], "attrs": {}, "data": [0]}}, "attrs": {}, "dims": {"iter": 20, "suggestion": 1}, "data_vars": {"alpha": {"dims": ["iter", "suggestion"], "attrs": {}, "data": [[0.017187805233919027], [8.43373862587205], [0.1509588796808082], [0.011620778603698066], [43.64851992973691], [0.01], [100.0], [100.0], [1.037695389876803], [0.013004947836678202], [0.01], [0.013010519387419449], [100.0], [0.013093392124529812], [0.024518989116895814], [0.01], [1.2977091639478373], [0.03933841937219868], [0.025716776079167728], [0.0691901057370618]]}, "fit_intercept": {"dims": ["iter", "suggestion"], "attrs": {}, "data": [[0], [0], [1], [1], [1], [0], [0], [1], [0], [0], [0], [0], [0], [0], [0], [0], [1], [0], [0], [0]]}, "max_iter": {"dims": ["iter", "suggestion"], "attrs": {}, "data": [[2786], [2190], [4690], [610], [1001], [5000], [5000], [3552], [2593], [10], [3105], [873], [5000], [5000], [10], [10], [10], [10], [10], [5000]]}, "normalize": {"dims": ["iter", "suggestion"], "attrs": {}, "data": [[1], [0], [0], [1], [1], [1], [1], [0], [0], [1], [1], [1], [1], [1], [0], [0], [1], [1], [1], [1]]}, "positive": {"dims": ["iter", "suggestion"], "attrs": {}, "data": [[0], [0], [1], [0], [1], [0], [0], [1], [0], [1], [0], [0], [0], [0], [0], [0], [0], [0], [0], [0]]}, "tol": {"dims": ["iter", "suggestion"], "attrs": {}, "data": [[0.00011510242564145134], [0.00039892699509092364], [0.018285509297598267], [3.211182712862061e-05], [0.00010840181563521316], [1e-05], [0.1], [1e-05], [3.148881549936396e-05], [0.1], [9.262562969824563e-05], [1e-05], [1.6947353370272092e-05], [0.1], [1e-05], [1e-05], [1e-05], [1e-05], [1e-05], [1e-05]]}}}}
