# Supplementary material
Source: ML conference proceedings conference paper supplement (https://proceedings.neurips.cc/paper_files/paper/2022/hash/31a57804448363bcab777f818f75f5b4-Abstract.html)
Supplement: Supplementary file 1 [file 31a57804448363bcab777f818f75f5b4-Supplemental-Conference.zip › trading_off_resource_budgets_f-Supplementary Material/code_and_data/experiments/base_results/bo_20220228_124924_b7rkpeqg/suggest_log/08698f5c63b254958afb157950e01527.json]

{"meta": {"args": {"--uuid": "08698f5c63b254958afb157950e01527", "-db-root": "/home/damon_falck/blackboxbandits/experiments/saved_results", "--opt-root": "/home/damon_falck/blackboxbandits/experiments", "--data-root": "/home/damon_falck/blackboxbandits/experiments/penn_datasets", "--db": "bo_20220228_124924_b7rkpeqg", "--opt": "RandomSearch", "--data": "reg-626-fri-c2-500-50", "--classifier": "lasso", "--metric": "mse", "--calls": 20, "--suggestions": 1, "--jobs-file": null, "--verbose": false, "dry_run": false, "rev": "bd14afd", "opt_rev": "0.0.8"}, "signature": [[{"alpha": 1.5676677195506077, "fit_intercept": true, "max_iter": 423, "normalize": true, "positive": false, "tol": 0.0038333321561566623}, {"alpha": 0.5627932047415171, "fit_intercept": true, "max_iter": 3989, "normalize": false, "positive": true, "tol": 0.001304907355036239}, {"alpha": 1.871450068624068, "fit_intercept": true, "max_iter": 16, "normalize": false, "positive": false, "tol": 0.021403233140986057}, {"alpha": 12.960656597279737, "fit_intercept": true, "max_iter": 4378, "normalize": true, "positive": false, "tol": 0.013246974647468445}, {"alpha": 0.029723346443356558, "fit_intercept": true, "max_iter": 24, "normalize": true, "positive": true, "tol": 0.00045566719139214756}], [1.000261404224774, 1.000261404224774, 1.000261404224774, 1.000261404224774, 1.000261404224774]]},
"data": {"coords": {"iter": {"dims": ["iter"], "attrs": {}, "data": [0, 1, 2, 3, 4, 5, 6, 7, 8, 9, 10, 11, 12, 13, 14, 15, 16, 17, 18, 19]}, "suggestion": {"dims": ["suggestion"], "attrs": {}, "data": [0]}}, "attrs": {}, "dims": {"iter": 20, "suggestion": 1}, "data_vars": {"alpha": {"dims": ["iter", "suggestion"], "attrs": {}, "data": [[0.043189748118949066], [0.5677058876478625], [26.986744326149125], [0.026997639730581776], [0.5133754196532235], [13.914401720304822], [0.6919268599038242], [22.89288696020824], [17.282633965428467], [0.037504296031180745], [0.3497111997133882], [0.9273990083621122], [83.63780636769472], [2.137159247090523], [0.012979852270499925], [0.025859632514635026], [0.01856096526776343], [2.685596400788464], [86.31752386780737], [0.04262333735096141]]}, "fit_intercept": {"dims": ["iter", "suggestion"], "attrs": {}, "data": [[false], [true], [true], [false], [false], [true], [false], [true], [true], [true], [false], [true], [false], [false], [false], [true], [true], [true], [true], [true]]}, "max_iter": {"dims": ["iter", "suggestion"], "attrs": {}, "data": [[154], [102], [127], [131], [33], [31], [17], [44], [17], [543], [1679], [16], [163], [33], [1121], [19], [483], [204], [120], [11]]}, "normalize": {"dims": ["iter", "suggestion"], "attrs": {}, "data": [[false], [true], [true], [false], [false], [false], [true], [true], [false], [true], [true], [false], [true], [false], [false], [true], [true], [false], [true], [true]]}, "positive": {"dims": ["iter", "suggestion"], "attrs": {}, "data": [[true], [true], [false], [false], [false], [false], [true], [true], [false], [true], [true], [true], [false], [false], [false], [false], [false], [true], [false], [true]]}, "tol": {"dims": ["iter", "suggestion"], "attrs": {}, "data": [[0.01588467592058476], [0.006289291052277689], [6.333320612049777e-05], [0.005560790481455561], [0.015779448692530326], [0.0488143730455589], [2.893250226608248e-05], [0.0005500183758234229], [7.903939155023127e-05], [0.028738668033206294], [0.09589206799301424], [0.06264255152312281], [0.02867496847703089], [2.0664999104909652e-05], [2.8848846759592933e-05], [0.015404620404225636], [0.03408809652373517], [1.7973162490677654e-05], [0.00037950231423617743], [6.313082457192624e-05]]}}}}
