# Supplementary material
Source: ML conference proceedings conference paper supplement (https://proceedings.neurips.cc/paper_files/paper/2022/hash/31a57804448363bcab777f818f75f5b4-Abstract.html)
Supplement: Supplementary file 1 [file 31a57804448363bcab777f818f75f5b4-Supplemental-Conference.zip › trading_off_resource_budgets_f-Supplementary Material/code_and_data/experiments/base_results/bo_20220228_124924_b7rkpeqg/suggest_log/09291b3271ba56ef83f7cfae37dac8e9.json]

{"meta": {"args": {"--uuid": "09291b3271ba56ef83f7cfae37dac8e9", "-db-root": "/home/damon_falck/blackboxbandits/experiments/saved_results", "--opt-root": "/home/damon_falck/blackboxbandits/experiments", "--data-root": "/home/damon_falck/blackboxbandits/experiments/penn_datasets", "--db": "bo_20220228_124924_b7rkpeqg", "--opt": "Scikit-GP-Hedge", "--data": "clf-cloud", "--classifier": "lasso", "--metric": "nll", "--calls": 20, "--suggestions": 1, "--jobs-file": null, "--verbose": false, "dry_run": false, "rev": "bd14afd", "opt_rev": "0.9.0"}, "signature": [[{"C": 1.5676677195506077, "intercept_scaling": 7.257005721594282}, {"C": 2.57663857461359, "intercept_scaling": 1.5119336467641016}, {"C": 0.49501595537331966, "intercept_scaling": 3.833332156156665}, {"C": 0.5627932047415171, "intercept_scaling": 36.905577292137636}, {"C": 71.55682161754872, "intercept_scaling": 0.34179529120610125}], [1.3612979619707473, 1.370038303073512, 1.3376159262531488, 1.3422636526902327, 1.4198222442426434]]},
"data": {"coords": {"iter": {"dims": ["iter"], "attrs": {}, "data": [0, 1, 2, 3, 4, 5, 6, 7, 8, 9, 10, 11, 12, 13, 14, 15, 16, 17, 18, 19]}, "suggestion": {"dims": ["suggestion"], "attrs": {}, "data": [0]}}, "attrs": {}, "dims": {"iter": 20, "suggestion": 1}, "data_vars": {"C": {"dims": ["iter", "suggestion"], "attrs": {}, "data": [[2.1359290639489927], [0.046225958604423106], [0.3040306518690834], [1.0528215515411634], [53.659707927859465], [1.1466619973284222], [0.1930456299061687], [0.1275409573418155], [0.01], [0.23936044776567844], [0.2403697722245286], [0.24288725998140723], [10.473906509235254], [0.9830660678054527], [3.8907979991113644], [0.40593332493620576], [0.23811023382968002], [0.20801713344272862], [100.0], [0.01696017530331944]]}, "intercept_scaling": {"dims": ["iter", "suggestion"], "attrs": {}, "data": [[18.535061879331305], [0.48202035639978363], [6.326899892622583], [99.1821274666307], [0.031031215657006627], [99.98780732385212], [5.5535550335794], [27.950069141579764], [7.895595793980568], [0.01], [0.6938286762939849], [100.0], [100.0], [0.01], [0.01], [100.0], [20.62244517849786], [84.44561120108789], [100.0], [0.010026845019035661]]}}}}
