# Supplementary material
Source: ML conference proceedings conference paper supplement (https://proceedings.neurips.cc/paper_files/paper/2022/hash/31a57804448363bcab777f818f75f5b4-Abstract.html)
Supplement: Supplementary file 1 [file 31a57804448363bcab777f818f75f5b4-Supplemental-Conference.zip › trading_off_resource_budgets_f-Supplementary Material/code_and_data/experiments/base_results/bo_20220228_124924_b7rkpeqg/suggest_log/014658faa525594796e3dcaac3905993.json]

{"meta": {"args": {"--uuid": "014658faa525594796e3dcaac3905993", "-db-root": "/home/damon_falck/blackboxbandits/experiments/saved_results", "--opt-root": "/home/damon_falck/blackboxbandits/experiments", "--data-root": "/home/damon_falck/blackboxbandits/experiments/penn_datasets", "--db": "bo_20220228_124924_b7rkpeqg", "--opt": "OpenTuner-GA-DE", "--data": "clf-cmc", "--classifier": "lasso", "--metric": "nll", "--calls": 20, "--suggestions": 1, "--jobs-file": null, "--verbose": false, "dry_run": false, "rev": "bd14afd", "opt_rev": "0.8.7"}, "signature": [[{"C": 1.5676677195506077, "intercept_scaling": 7.257005721594282}, {"C": 2.57663857461359, "intercept_scaling": 1.5119336467641016}, {"C": 0.49501595537331966, "intercept_scaling": 3.833332156156665}, {"C": 0.5627932047415171, "intercept_scaling": 36.905577292137636}, {"C": 71.55682161754872, "intercept_scaling": 0.34179529120610125}], [0.9699552934287652, 0.9703502677983163, 0.969834205100575, 0.9697185039702519, 0.9713562775501524]]},
"data": {"coords": {"iter": {"dims": ["iter"], "attrs": {}, "data": [0, 1, 2, 3, 4, 5, 6, 7, 8, 9, 10, 11, 12, 13, 14, 15, 16, 17, 18, 19]}, "suggestion": {"dims": ["suggestion"], "attrs": {}, "data": [0]}}, "attrs": {}, "dims": {"iter": 20, "suggestion": 1}, "data_vars": {"C": {"dims": ["iter", "suggestion"], "attrs": {}, "data": [[65.36944223030808], [65.36944223030808], [0.9226786539749408], [65.36944223030808], [26.67852599816066], [12.640300867022873], [23.457080624483034], [3.739140943069912], [4.344729225912374], [11.478710480574314], [3.739140943069912], [3.739140943069912], [3.739140943069912], [3.739140943069912], [3.739140943069912], [16.05401956736255], [3.739140943069912], [8.246495722512835], [2.1139678497019765], [28.669772323089113]]}, "intercept_scaling": {"dims": ["iter", "suggestion"], "attrs": {}, "data": [[42.52988358515261], [1.7913749979439568], [0.0738986837849953], [70.09876195553407], [10.87806553588325], [10.87806553588325], [17.8217262852259], [10.87806553588325], [0.1966778186280962], [0.6927671149987351], [57.31898872178558], [1.0399725179455512], [39.841302195789645], [0.09923715077365068], [30.277603649641797], [1.0399725179455512], [0.02309047224557225], [1.0399725179455512], [37.32441479808097], [44.283287133396385]]}}}}
