# Supplementary material
Source: ML conference proceedings conference paper supplement (https://proceedings.neurips.cc/paper_files/paper/2022/hash/31a57804448363bcab777f818f75f5b4-Abstract.html)
Supplement: Supplementary file 1 [file 31a57804448363bcab777f818f75f5b4-Supplemental-Conference.zip › trading_off_resource_budgets_f-Supplementary Material/code_and_data/experiments/base_results/bo_20220228_124924_b7rkpeqg/suggest_log/050157aaaa81559685e949ef9217d9ac.json]

{"meta": {"args": {"--uuid": "050157aaaa81559685e949ef9217d9ac", "-db-root": "/home/damon_falck/blackboxbandits/experiments/saved_results", "--opt-root": "/home/damon_falck/blackboxbandits/experiments", "--data-root": "/home/damon_falck/blackboxbandits/experiments/penn_datasets", "--db": "bo_20220228_124924_b7rkpeqg", "--opt": "OpenTuner-GA-DE", "--data": "reg-635-fri-c0-250-10", "--classifier": "lasso", "--metric": "mse", "--calls": 20, "--suggestions": 1, "--jobs-file": null, "--verbose": false, "dry_run": false, "rev": "bd14afd", "opt_rev": "0.8.7"}, "signature": [[{"alpha": 1.5676677195506077, "fit_intercept": true, "max_iter": 423, "normalize": true, "positive": false, "tol": 0.0038333321561566623}, {"alpha": 0.5627932047415171, "fit_intercept": true, "max_iter": 3989, "normalize": false, "positive": true, "tol": 0.001304907355036239}, {"alpha": 1.871450068624068, "fit_intercept": true, "max_iter": 16, "normalize": false, "positive": false, "tol": 0.021403233140986057}, {"alpha": 12.960656597279737, "fit_intercept": true, "max_iter": 4378, "normalize": true, "positive": false, "tol": 0.013246974647468445}, {"alpha": 0.029723346443356558, "fit_intercept": true, "max_iter": 24, "normalize": true, "positive": true, "tol": 0.00045566719139214756}], [0.8852931159862306, 0.8852931159862306, 0.8852931159862306, 0.8852931159862306, 0.6922737007172498]]},
"data": {"coords": {"iter": {"dims": ["iter"], "attrs": {}, "data": [0, 1, 2, 3, 4, 5, 6, 7, 8, 9, 10, 11, 12, 13, 14, 15, 16, 17, 18, 19]}, "suggestion": {"dims": ["suggestion"], "attrs": {}, "data": [0]}}, "attrs": {}, "dims": {"iter": 20, "suggestion": 1}, "data_vars": {"alpha": {"dims": ["iter", "suggestion"], "attrs": {}, "data": [[10.243845367392098], [79.76933880738252], [5.883536955943461], [10.243845367392098], [27.142030295467734], [0.3140429755619185], [0.3140429755619185], [0.3140429755619185], [0.9542046158716166], [0.3140429755619185], [0.3140429755619185], [22.497467711005328], [0.2726331950157057], [0.3140429755619185], [0.7708743450799134], [0.32138283261550504], [0.6357579288375008], [35.97932197992959], [70.07557318929496], [0.24382142108102056]]}, "fit_intercept": {"dims": ["iter", "suggestion"], "attrs": {}, "data": [[0], [0], [0], [0], [1], [0], [0], [0], [0], [0], [0], [0], [1], [1], [0], [1], [0], [0], [1], [0]]}, "max_iter": {"dims": ["iter", "suggestion"], "attrs": {}, "data": [[11], [868], [30], [11], [11], [11], [13], [34], [13], [11], [495], [50], [3353], [11], [11], [16], [11], [10], [1857], [11]]}, "normalize": {"dims": ["iter", "suggestion"], "attrs": {}, "data": [[0], [0], [1], [0], [1], [0], [0], [0], [0], [0], [0], [0], [1], [0], [0], [0], [0], [0], [1], [0]]}, "positive": {"dims": ["iter", "suggestion"], "attrs": {}, "data": [[0], [0], [1], [1], [1], [1], [1], [1], [0], [1], [1], [0], [1], [1], [1], [0], [1], [0], [1], [1]]}, "tol": {"dims": ["iter", "suggestion"], "attrs": {}, "data": [[0.0016667747109825781], [0.0007094800070352359], [0.08655637187471636], [0.0016667747109825781], [0.027136038807225416], [0.0016667747109825781], [0.0016667747109825781], [0.0016667747109825781], [0.09453126590687903], [0.0433722852944251], [0.0016667747109825781], [0.09058611528227016], [0.0706065256155081], [0.0016667747109825781], [0.0016667747109825781], [0.01897825060490359], [0.0016667747109825781], [0.09476018513898359], [0.03798588016383036], [0.0016667747109825781]]}}}}
