# Supplementary material
Source: ML conference proceedings conference paper supplement (https://proceedings.neurips.cc/paper_files/paper/2022/hash/31a57804448363bcab777f818f75f5b4-Abstract.html)
Supplement: Supplementary file 1 [file 31a57804448363bcab777f818f75f5b4-Supplemental-Conference.zip › trading_off_resource_budgets_f-Supplementary Material/code_and_data/experiments/base_results/bo_20220228_124924_b7rkpeqg/suggest_log/070413f1247b5ce78ff390890834bfb8.json]

{"meta": {"args": {"--uuid": "070413f1247b5ce78ff390890834bfb8", "-db-root": "/home/damon_falck/blackboxbandits/experiments/saved_results", "--opt-root": "/home/damon_falck/blackboxbandits/experiments", "--data-root": "/home/damon_falck/blackboxbandits/experiments/penn_datasets", "--db": "bo_20220228_124924_b7rkpeqg", "--opt": "Scikit-GBRT-Hedge", "--data": "reg-613-fri-c3-250-5", "--classifier": "lasso", "--metric": "mse", "--calls": 20, "--suggestions": 1, "--jobs-file": null, "--verbose": false, "dry_run": false, "rev": "bd14afd", "opt_rev": "0.9.0"}, "signature": [[{"alpha": 1.5676677195506077, "fit_intercept": true, "max_iter": 423, "normalize": true, "positive": false, "tol": 0.0038333321561566623}, {"alpha": 0.5627932047415171, "fit_intercept": true, "max_iter": 3989, "normalize": false, "positive": true, "tol": 0.001304907355036239}, {"alpha": 1.871450068624068, "fit_intercept": true, "max_iter": 16, "normalize": false, "positive": false, "tol": 0.021403233140986057}, {"alpha": 12.960656597279737, "fit_intercept": true, "max_iter": 4378, "normalize": true, "positive": false, "tol": 0.013246974647468445}, {"alpha": 0.029723346443356558, "fit_intercept": true, "max_iter": 24, "normalize": true, "positive": true, "tol": 0.00045566719139214756}], [0.9878906043002715, 0.9878906043002715, 0.9878906043002715, 0.9878906043002715, 0.9190983737674744]]},
"data": {"coords": {"iter": {"dims": ["iter"], "attrs": {}, "data": [0, 1, 2, 3, 4, 5, 6, 7, 8, 9, 10, 11, 12, 13, 14, 15, 16, 17, 18, 19]}, "suggestion": {"dims": ["suggestion"], "attrs": {}, "data": [0]}}, "attrs": {}, "dims": {"iter": 20, "suggestion": 1}, "data_vars": {"alpha": {"dims": ["iter", "suggestion"], "attrs": {}, "data": [[1.943555556088909], [21.630511243790632], [44.37545821461597], [0.45073660157887285], [99.98663624854649], [0.7209611021020649], [0.011825112925529428], [0.05992985473923105], [0.017818281199336136], [0.021837282850758477], [0.015821201982687338], [0.015919512837840332], [0.0187374798474618], [0.01778473281737382], [0.019573591181128624], [0.020581325416953133], [0.019544396847426284], [0.019246254488002427], [0.020220376077788052], [2.4916195549426643]]}, "fit_intercept": {"dims": ["iter", "suggestion"], "attrs": {}, "data": [[0], [1], [1], [0], [0], [0], [0], [0], [0], [1], [0], [0], [0], [0], [0], [0], [0], [0], [0], [0]]}, "max_iter": {"dims": ["iter", "suggestion"], "attrs": {}, "data": [[3827], [4934], [4592], [1962], [329], [2035], [2594], [1972], [3694], [2871], [3498], [4478], [4980], [1514], [1980], [1690], [1055], [1174], [1838], [4984]]}, "normalize": {"dims": ["iter", "suggestion"], "attrs": {}, "data": [[1], [0], [1], [0], [1], [0], [0], [1], [1], [1], [0], [0], [1], [1], [0], [0], [0], [1], [0], [1]]}, "positive": {"dims": ["iter", "suggestion"], "attrs": {}, "data": [[1], [0], [1], [1], [0], [0], [1], [1], [0], [1], [0], [0], [0], [0], [0], [0], [0], [0], [0], [0]]}, "tol": {"dims": ["iter", "suggestion"], "attrs": {}, "data": [[7.749254947615518e-05], [0.08233460764835221], [0.002301223879795366], [0.0007110898896848321], [0.02082277822328005], [0.0016549183404588612], [0.054125991024930833], [0.00024725816514075625], [0.00011209252420423259], [0.00013872028459596024], [1.072612135332823e-05], [9.595514024099885e-05], [7.179851378533625e-05], [5.400433897733595e-05], [3.00068503774409e-05], [1.9818687713033875e-05], [2.108187880589088e-05], [1.7247247611375308e-05], [1.822656453513669e-05], [1.2274047607595927e-05]]}}}}
