# Supplementary material
Source: ML conference proceedings conference paper supplement (https://proceedings.neurips.cc/paper_files/paper/2022/hash/31a57804448363bcab777f818f75f5b4-Abstract.html)
Supplement: Supplementary file 1 [file 31a57804448363bcab777f818f75f5b4-Supplemental-Conference.zip › trading_off_resource_budgets_f-Supplementary Material/code_and_data/experiments/base_results/bo_20220228_124924_b7rkpeqg/suggest_log/070757b8c1a8551a958b6ec949ebd38a.json]

{"meta": {"args": {"--uuid": "070757b8c1a8551a958b6ec949ebd38a", "-db-root": "/home/damon_falck/blackboxbandits/experiments/saved_results", "--opt-root": "/home/damon_falck/blackboxbandits/experiments", "--data-root": "/home/damon_falck/blackboxbandits/experiments/penn_datasets", "--db": "bo_20220228_124924_b7rkpeqg", "--opt": "OpenTuner-GA", "--data": "reg-690-visualizing-galaxy", "--classifier": "lasso", "--metric": "mse", "--calls": 20, "--suggestions": 1, "--jobs-file": null, "--verbose": false, "dry_run": false, "rev": "bd14afd", "opt_rev": "0.8.7"}, "signature": [[{"alpha": 1.5676677195506077, "fit_intercept": true, "max_iter": 423, "normalize": true, "positive": false, "tol": 0.0038333321561566623}, {"alpha": 0.5627932047415171, "fit_intercept": true, "max_iter": 3989, "normalize": false, "positive": true, "tol": 0.001304907355036239}, {"alpha": 1.871450068624068, "fit_intercept": true, "max_iter": 16, "normalize": false, "positive": false, "tol": 0.021403233140986057}, {"alpha": 12.960656597279737, "fit_intercept": true, "max_iter": 4378, "normalize": true, "positive": false, "tol": 0.013246974647468445}, {"alpha": 0.029723346443356558, "fit_intercept": true, "max_iter": 24, "normalize": true, "positive": true, "tol": 0.00045566719139214756}], [0.9160685394884517, 0.8347442575403428, 0.9160685394884517, 0.9160685394884517, 0.6985449474385834]]},
"data": {"coords": {"iter": {"dims": ["iter"], "attrs": {}, "data": [0, 1, 2, 3, 4, 5, 6, 7, 8, 9, 10, 11, 12, 13, 14, 15, 16, 17, 18, 19]}, "suggestion": {"dims": ["suggestion"], "attrs": {}, "data": [0]}}, "attrs": {}, "dims": {"iter": 20, "suggestion": 1}, "data_vars": {"alpha": {"dims": ["iter", "suggestion"], "attrs": {}, "data": [[0.78682840547239], [0.78682840547239], [27.27773040551145], [2.446815976870682], [0.78682840547239], [10.470856047977911], [0.78682840547239], [0.78682840547239], [0.78682840547239], [40.54285355997355], [0.78682840547239], [1.827264252620621], [98.94598780633926], [3.277114113558855], [2.6005427897664215], [0.9675063132930637], [17.10821741439172], [0.78682840547239], [29.421493516510406], [29.421493516510406]]}, "fit_intercept": {"dims": ["iter", "suggestion"], "attrs": {}, "data": [[0], [0], [0], [0], [0], [0], [0], [0], [0], [1], [1], [0], [0], [0], [1], [1], [0], [0], [0], [0]]}, "max_iter": {"dims": ["iter", "suggestion"], "attrs": {}, "data": [[4795], [4795], [566], [10], [4795], [10], [165], [4795], [10], [117], [4795], [643], [1795], [49], [1958], [12], [4795], [4795], [4795], [4795]]}, "normalize": {"dims": ["iter", "suggestion"], "attrs": {}, "data": [[1], [0], [0], [1], [1], [0], [1], [1], [1], [0], [1], [0], [1], [0], [1], [1], [1], [1], [0], [0]]}, "positive": {"dims": ["iter", "suggestion"], "attrs": {}, "data": [[0], [0], [1], [0], [0], [1], [0], [0], [0], [0], [0], [1], [0], [1], [1], [0], [0], [1], [0], [0]]}, "tol": {"dims": ["iter", "suggestion"], "attrs": {}, "data": [[0.021037674561777898], [0.021037674561777898], [0.09352722897787695], [0.09304969196510464], [0.0662036899889195], [0.05923417864464369], [0.021037674561777898], [0.07718507660440992], [0.021037674561777898], [0.09316221230978831], [0.021037674561777898], [0.054900687014677034], [0.053042786387656964], [0.06703188962243305], [0.031532947698350515], [0.08577959348688517], [0.021037674561777898], [0.021037674561777898], [0.021037674561777898], [0.021037674561777898]]}}}}
