# Supplementary material
Source: ML conference proceedings conference paper supplement (https://proceedings.neurips.cc/paper_files/paper/2022/hash/31a57804448363bcab777f818f75f5b4-Abstract.html)
Supplement: Supplementary file 1 [file 31a57804448363bcab777f818f75f5b4-Supplemental-Conference.zip › trading_off_resource_budgets_f-Supplementary Material/code_and_data/experiments/base_results/bo_20220228_124924_b7rkpeqg/suggest_log/0271410c4cc15580a88c5ee8b1431ff4.json]

{"meta": {"args": {"--uuid": "0271410c4cc15580a88c5ee8b1431ff4", "-db-root": "/home/damon_falck/blackboxbandits/experiments/saved_results", "--opt-root": "/home/damon_falck/blackboxbandits/experiments", "--data-root": "/home/damon_falck/blackboxbandits/experiments/penn_datasets", "--db": "bo_20220228_124924_b7rkpeqg", "--opt": "Scikit-GP-LCB", "--data": "reg-230-machine-cpu", "--classifier": "MLP-adam", "--metric": "mse", "--calls": 20, "--suggestions": 1, "--jobs-file": null, "--verbose": false, "dry_run": false, "rev": "bd14afd", "opt_rev": "0.9.0"}, "signature": [[{"alpha": 0.019628224813442792, "batch_size": 182, "beta_1": 0.9410202200271762, "beta_2": 0.9998021557676793, "epsilon": 1.8662266976518e-08, "hidden_layer_sizes": 147, "learning_rate_init": 0.0005627932047415167, "tol": 0.03690557729213761, "validation_fraction": 0.8846827852548593}, {"alpha": 0.001998246739232944, "batch_size": 200, "beta_1": 0.919111482530466, "beta_2": 0.9998488260436156, "epsilon": 5.981221901152555e-07, "hidden_layer_sizes": 61, "learning_rate_init": 2.2310905607443014e-05, "tol": 1.2046852412030316e-05, "validation_fraction": 0.8117896445826539}, {"alpha": 0.46659545670218433, "batch_size": 219, "beta_1": 0.9889789783750891, "beta_2": 0.9999896868093284, "epsilon": 2.4234724484675948e-08, "hidden_layer_sizes": 167, "learning_rate_init": 2.972334644335654e-05, "tol": 0.0036281404040243792, "validation_fraction": 0.17260651658522078}, {"alpha": 4.656005689076002, "batch_size": 135, "beta_1": 0.870503881627747, "beta_2": 0.9948873266941017, "epsilon": 2.1023308743480125e-07, "hidden_layer_sizes": 118, "learning_rate_init": 0.001878173875716191, "tol": 1.1889379831773006e-05, "validation_fraction": 0.6264327093752792}, {"alpha": 0.04705159350400542, "batch_size": 158, "beta_1": 0.9870884262730957, "beta_2": 0.9999596874382349, "epsilon": 1.1981845126013875e-08, "hidden_layer_sizes": 116, "learning_rate_init": 0.006173405204074311, "tol": 1.7414134181586194e-05, "validation_fraction": 0.6754299026638921}], [1.2278865656786386, 3.32091597543832, 2.7682026516517717, 0.7243390018250118, 0.5445361769018942]]},
"data": {"coords": {"iter": {"dims": ["iter"], "attrs": {}, "data": [0, 1, 2, 3, 4, 5, 6, 7, 8, 9, 10, 11, 12, 13, 14, 15, 16, 17, 18, 19]}, "suggestion": {"dims": ["suggestion"], "attrs": {}, "data": [0]}}, "attrs": {}, "dims": {"iter": 20, "suggestion": 1}, "data_vars": {"alpha": {"dims": ["iter", "suggestion"], "attrs": {}, "data": [[0.02219001477139089], [0.033404148130338186], [0.027654669690149153], [0.026031894172981712], [0.6000689334635766], [1e-05], [10.0], [1e-05], [1e-05], [1e-05], [1e-05], [1e-05], [10.0], [1e-05], [1e-05], [1e-05], [1e-05], [1e-05], [0.00032220929188981907], [10.0]]}, "batch_size": {"dims": ["iter", "suggestion"], "attrs": {}, "data": [[145], [52], [236], [81], [209], [10], [250], [250], [10], [10], [250], [250], [10], [10], [10], [10], [250], [10], [10], [250]]}, "beta_1": {"dims": ["iter", "suggestion"], "attrs": {}, "data": [[0.9067570049953367], [0.5400538729750112], [0.7102781123170431], [0.8865756871335836], [0.5752999699012116], [0.99], [0.99], [0.5], [0.5], [0.5], [0.5], [0.5], [0.5], [0.5], [0.99], [0.5], [0.5], [0.5], [0.5], [0.5]]}, "beta_2": {"dims": ["iter", "suggestion"], "attrs": {}, "data": [[0.996430412587812], [0.9972099393105874], [0.9078499246339659], [0.9913116164560046], [0.9848381369036864], [0.999999], [0.9], [0.9], [0.9], [0.999999], [0.9], [0.9], [0.999999], [0.9055637024908002], [0.9], [0.999999], [0.9], [0.9], [0.9077706304816756], [0.9]]}, "epsilon": {"dims": ["iter", "suggestion"], "attrs": {}, "data": [[2.149001547741975e-09], [1.0453328693661687e-08], [1.4774955936866731e-08], [1.8481081507349852e-07], [4.618189858005025e-08], [1e-06], [1e-09], [1e-09], [1e-06], [1e-09], [1e-06], [4.6848787125656283e-07], [1e-09], [1e-09], [9.458173618713613e-07], [1e-06], [1e-09], [1e-09], [5.71175345026722e-07], [3.259916286222067e-09]]}, "hidden_layer_sizes": {"dims": ["iter", "suggestion"], "attrs": {}, "data": [[151], [195], [87], [193], [188], [50], [50], [50], [200], [200], [59], [200], [200], [50], [200], [200], [50], [200], [136], [166]]}, "learning_rate_init": {"dims": ["iter", "suggestion"], "attrs": {}, "data": [[0.0035162473950146357], [0.0059650626593434775], [1.4711570059947267e-05], [0.007298917832681813], [0.0007550602429413528], [1e-05], [0.1], [0.1], [0.0054301777798667], [0.1], [0.013235540136409086], [0.007001224455315074], [1e-05], [0.031163884309136344], [0.0033455970698396047], [0.1], [0.0048272832783185175], [0.1], [0.029162516761266518], [0.06703319701319854]]}, "tol": {"dims": ["iter", "suggestion"], "attrs": {}, "data": [[0.0032857078289842516], [0.00040414366934722536], [0.018170584463018852], [0.0002396301497150208], [1.4291738302896559e-05], [0.1], [0.1], [0.1], [1e-05], [1e-05], [1e-05], [0.1], [0.1], [0.1], [0.1], [0.1], [0.0004961704312957548], [0.0021502580118839144], [0.1], [0.0014032597155313295]]}, "validation_fraction": {"dims": ["iter", "suggestion"], "attrs": {}, "data": [[0.32973246232248343], [0.11892286519817849], [0.4303887781200657], [0.135804630290517], [0.1372596833978112], [0.9], [0.9], [0.9], [0.1], [0.9], [0.1], [0.9], [0.1], [0.8920642215522344], [0.1], [0.1], [0.9], [0.1], [0.1], [0.4149013378359436]]}}}}
