# Supplementary material
Source: ML conference proceedings conference paper supplement (https://proceedings.neurips.cc/paper_files/paper/2022/hash/31a57804448363bcab777f818f75f5b4-Abstract.html)
Supplement: Supplementary file 1 [file 31a57804448363bcab777f818f75f5b4-Supplemental-Conference.zip › trading_off_resource_budgets_f-Supplementary Material/code_and_data/experiments/base_results/bo_20220228_124924_b7rkpeqg/suggest_log/0379287a86a953cd8bd2ce6f2325de8a.json]

{"meta": {"args": {"--uuid": "0379287a86a953cd8bd2ce6f2325de8a", "-db-root": "/home/damon_falck/blackboxbandits/experiments/saved_results", "--opt-root": "/home/damon_falck/blackboxbandits/experiments", "--data-root": "/home/damon_falck/blackboxbandits/experiments/penn_datasets", "--db": "bo_20220228_124924_b7rkpeqg", "--opt": "HyperOpt", "--data": "clf-tokyo1", "--classifier": "MLP-adam", "--metric": "nll", "--calls": 20, "--suggestions": 1, "--jobs-file": null, "--verbose": false, "dry_run": false, "rev": "bd14afd", "opt_rev": "0.2.7"}, "signature": [[{"alpha": 0.019628224813442792, "batch_size": 182, "beta_1": 0.9410202200271762, "beta_2": 0.9998021557676793, "epsilon": 1.8662266976518e-08, "hidden_layer_sizes": 147, "learning_rate_init": 0.0005627932047415167, "tol": 0.03690557729213761, "validation_fraction": 0.8846827852548593}, {"alpha": 0.001998246739232944, "batch_size": 200, "beta_1": 0.919111482530466, "beta_2": 0.9998488260436156, "epsilon": 5.981221901152555e-07, "hidden_layer_sizes": 61, "learning_rate_init": 2.2310905607443014e-05, "tol": 1.2046852412030316e-05, "validation_fraction": 0.8117896445826539}, {"alpha": 0.46659545670218433, "batch_size": 219, "beta_1": 0.9889789783750891, "beta_2": 0.9999896868093284, "epsilon": 2.4234724484675948e-08, "hidden_layer_sizes": 167, "learning_rate_init": 2.972334644335654e-05, "tol": 0.0036281404040243792, "validation_fraction": 0.17260651658522078}, {"alpha": 4.656005689076002, "batch_size": 135, "beta_1": 0.870503881627747, "beta_2": 0.9948873266941017, "epsilon": 2.1023308743480125e-07, "hidden_layer_sizes": 118, "learning_rate_init": 0.001878173875716191, "tol": 1.1889379831773006e-05, "validation_fraction": 0.6264327093752792}, {"alpha": 0.04705159350400542, "batch_size": 158, "beta_1": 0.9870884262730957, "beta_2": 0.9999596874382349, "epsilon": 1.1981845126013875e-08, "hidden_layer_sizes": 116, "learning_rate_init": 0.006173405204074311, "tol": 1.7414134181586194e-05, "validation_fraction": 0.6754299026638921}], [0.48712771848535497, 0.9947214631145016, 0.6843269454395297, 0.3680027008418264, 0.3556410176280018]]},
"data": {"coords": {"iter": {"dims": ["iter"], "attrs": {}, "data": [0, 1, 2, 3, 4, 5, 6, 7, 8, 9, 10, 11, 12, 13, 14, 15, 16, 17, 18, 19]}, "suggestion": {"dims": ["suggestion"], "attrs": {}, "data": [0]}}, "attrs": {}, "dims": {"iter": 20, "suggestion": 1}, "data_vars": {"alpha": {"dims": ["iter", "suggestion"], "attrs": {}, "data": [[0.012085077495253676], [6.184699411732022e-05], [0.02924746505849534], [1.5953023926559445e-05], [0.3999236254123912], [0.006548126104902126], [0.00020005379635711548], [0.0031131430571004924], [0.968924974897442], [0.21262779388340847], [0.006356713523441535], [0.0008256201589646855], [0.09765308020729643], [0.004550578326626334], [1.1480714639544263e-05], [0.0070953856789197], [0.00013582037368627359], [2.4383403091560297e-05], [0.10336146985119866], [6.424255071284727]]}, "batch_size": {"dims": ["iter", "suggestion"], "attrs": {}, "data": [[85], [139], [199], [183], [147], [51], [186], [137], [111], [247], [239], [166], [100], [34], [46], [36], [59], [20], [88], [38]]}, "beta_1": {"dims": ["iter", "suggestion"], "attrs": {}, "data": [[0.515632913884754], [0.8708198045167324], [0.5669615772136661], [0.9303714605615204], [0.8880690940097775], [0.9078473752957269], [0.5044633130909855], [0.8062464327768697], [0.7660618586898412], [0.5919409421337586], [0.5438651703776679], [0.534872871561394], [0.6573383378102085], [0.6725044094102117], [0.5153935762836397], [0.8009487961965116], [0.8303227386417324], [0.9469177613099264], [0.5088471593359943], [0.5050137900039217]]}, "beta_2": {"dims": ["iter", "suggestion"], "attrs": {}, "data": [[0.9268031797475339], [0.9069261633523684], [0.9015577225655986], [0.9216229168357218], [0.9049714856711464], [0.9497335007356901], [0.9783219618235948], [0.9660533633316295], [0.9009018617190144], [0.9109121746111939], [0.9279073666729841], [0.9984366644530904], [0.9335532516878409], [0.9342464152503869], [0.9083571079276779], [0.9062346660762667], [0.9805757075827508], [0.9759236319745133], [0.9128685162758697], [0.9792309412977227]]}, "epsilon": {"dims": ["iter", "suggestion"], "attrs": {}, "data": [[9.928249931213917e-08], [1.9987137366628547e-07], [2.012926740997696e-09], [1.81417631123237e-08], [3.3666293970377345e-08], [4.588435134692539e-08], [8.878406111822296e-08], [1.0507951646342165e-07], [1.3967551189216317e-07], [3.6944687387275296e-09], [5.410163000021433e-09], [4.234615372713129e-07], [1.364617828210118e-07], [9.697429579898862e-07], [1.0570529198255193e-07], [2.4566860846538518e-08], [2.2651637584423946e-07], [7.088923248245149e-08], [1.2680501992339131e-08], [1.240914077240523e-08]]}, "hidden_layer_sizes": {"dims": ["iter", "suggestion"], "attrs": {}, "data": [[106], [135], [166], [163], [96], [160], [166], [89], [104], [128], [101], [112], [177], [55], [171], [178], [139], [121], [161], [52]]}, "learning_rate_init": {"dims": ["iter", "suggestion"], "attrs": {}, "data": [[1.8414088152385497e-05], [0.0004848679619506413], [0.0029841990668305796], [2.1169705987947587e-05], [0.0979362729898024], [0.0071182336815480045], [0.0012531420999486874], [0.00020176432410983072], [0.00013226995892265037], [0.005311647910740421], [0.006466079243306108], [0.025672572634629083], [0.0022377397119042633], [0.00031724608874902856], [0.030604596346327874], [1.269414786478368e-05], [0.09726430602197648], [0.0020507912745818158], [0.00023559891842825058], [1.915839288230696e-05]]}, "tol": {"dims": ["iter", "suggestion"], "attrs": {}, "data": [[0.00020629861098651114], [0.010528719767223402], [5.029883679049007e-05], [0.00016726335504962223], [0.041832913001732086], [0.0009235442141616328], [7.379135022098306e-05], [2.0761473052283475e-05], [0.0024601180992902577], [0.003786732862924979], [4.566410983961838e-05], [0.00016925063699891146], [0.0020574186836983276], [0.0005625404153159292], [0.0026782961600269944], [0.028074620409048248], [0.00036418735446192783], [0.019156204713987563], [8.195105657551812e-05], [0.05114305616839662]]}, "validation_fraction": {"dims": ["iter", "suggestion"], "attrs": {}, "data": [[0.6745450695007529], [0.737895228734285], [0.17399128597911576], [0.11619236116641679], [0.1791576812691409], [0.6028142806416557], [0.20857210608470997], [0.11642338927923294], [0.2245851208859234], [0.34344258842650716], [0.14152876614914095], [0.6408984298059591], [0.14457097087522938], [0.8622230020288658], [0.7683368984872327], [0.3773888931874318], [0.822924832768841], [0.8534514207202911], [0.22826644918567573], [0.6749252563914632]]}}}}
