# Supplementary material
Source: ML conference proceedings conference paper supplement (https://proceedings.neurips.cc/paper_files/paper/2022/hash/31a57804448363bcab777f818f75f5b4-Abstract.html)
Supplement: Supplementary file 1 [file 31a57804448363bcab777f818f75f5b4-Supplemental-Conference.zip › trading_off_resource_budgets_f-Supplementary Material/code_and_data/experiments/base_results/bo_20220228_124924_b7rkpeqg/suggest_log/0641541d1f1755c1ab40aad7c0f5728f.json]

{"meta": {"args": {"--uuid": "0641541d1f1755c1ab40aad7c0f5728f", "-db-root": "/home/damon_falck/blackboxbandits/experiments/saved_results", "--opt-root": "/home/damon_falck/blackboxbandits/experiments", "--data-root": "/home/damon_falck/blackboxbandits/experiments/penn_datasets", "--db": "bo_20220228_124924_b7rkpeqg", "--opt": "OpenTuner-GA-DE", "--data": "clf-heart-h", "--classifier": "MLP-adam", "--metric": "nll", "--calls": 20, "--suggestions": 1, "--jobs-file": null, "--verbose": false, "dry_run": false, "rev": "bd14afd", "opt_rev": "0.8.7"}, "signature": [[{"alpha": 0.019628224813442792, "batch_size": 182, "beta_1": 0.9410202200271762, "beta_2": 0.9998021557676793, "epsilon": 1.8662266976518e-08, "hidden_layer_sizes": 147, "learning_rate_init": 0.0005627932047415167, "tol": 0.03690557729213761, "validation_fraction": 0.8846827852548593}, {"alpha": 0.001998246739232944, "batch_size": 200, "beta_1": 0.919111482530466, "beta_2": 0.9998488260436156, "epsilon": 5.981221901152555e-07, "hidden_layer_sizes": 61, "learning_rate_init": 2.2310905607443014e-05, "tol": 1.2046852412030316e-05, "validation_fraction": 0.8117896445826539}, {"alpha": 0.46659545670218433, "batch_size": 219, "beta_1": 0.9889789783750891, "beta_2": 0.9999896868093284, "epsilon": 2.4234724484675948e-08, "hidden_layer_sizes": 167, "learning_rate_init": 2.972334644335654e-05, "tol": 0.0036281404040243792, "validation_fraction": 0.17260651658522078}, {"alpha": 4.656005689076002, "batch_size": 135, "beta_1": 0.870503881627747, "beta_2": 0.9948873266941017, "epsilon": 2.1023308743480125e-07, "hidden_layer_sizes": 118, "learning_rate_init": 0.001878173875716191, "tol": 1.1889379831773006e-05, "validation_fraction": 0.6264327093752792}, {"alpha": 0.04705159350400542, "batch_size": 158, "beta_1": 0.9870884262730957, "beta_2": 0.9999596874382349, "epsilon": 1.1981845126013875e-08, "hidden_layer_sizes": 116, "learning_rate_init": 0.006173405204074311, "tol": 1.7414134181586194e-05, "validation_fraction": 0.6754299026638921}], [0.6145646928498775, 0.6945356291934685, 0.6952553084197384, 0.43946667183747684, 0.44359418067381257]]},
"data": {"coords": {"iter": {"dims": ["iter"], "attrs": {}, "data": [0, 1, 2, 3, 4, 5, 6, 7, 8, 9, 10, 11, 12, 13, 14, 15, 16, 17, 18, 19]}, "suggestion": {"dims": ["suggestion"], "attrs": {}, "data": [0]}}, "attrs": {}, "dims": {"iter": 20, "suggestion": 1}, "data_vars": {"alpha": {"dims": ["iter", "suggestion"], "attrs": {}, "data": [[0.2969735948716838], [0.2969735948716838], [2.8434536137001514], [7.653192565470464], [7.653192565470464], [7.653192565470464], [7.653192565470464], [1.3677967281146453], [0.3594025911877465], [9.154397799528704], [4.371793956133966], [5.775935904080858], [4.031739796465795], [0.5745812335284671], [2.086015688073677], [0.08239534355291271], [1.585649682217083], [6.604548879919606], [4.9800577307940666], [2.4479195742539677]]}, "batch_size": {"dims": ["iter", "suggestion"], "attrs": {}, "data": [[212], [212], [159], [211], [211], [211], [211], [102], [171], [132], [15], [238], [197], [228], [145], [242], [141], [187], [33], [121]]}, "beta_1": {"dims": ["iter", "suggestion"], "attrs": {}, "data": [[0.9512734545777793], [0.9512734545777793], [0.6262033620774452], [0.6776616681716042], [0.7338011005944087], [0.6776616681716042], [0.6776616681716042], [0.9490224482520571], [0.9537716775401706], [0.9361182888778166], [0.8641507254578679], [0.5618731507120901], [0.5338885321238992], [0.8724747524008445], [0.5772279571422747], [0.6840651924399089], [0.502871671683988], [0.820021793858413], [0.8488969988375583], [0.609443874883112]]}, "beta_2": {"dims": ["iter", "suggestion"], "attrs": {}, "data": [[0.9128933284113703], [0.9128933284113703], [0.9144961423596957], [0.9700642545654528], [0.9700642545654528], [0.9661456822534153], [0.9700642545654528], [0.9874886963721243], [0.9252486185665144], [0.9244066270460036], [0.9860307438208005], [0.982192435002162], [0.952081525351839], [0.9053955099906843], [0.9562912409826786], [0.9023958471399869], [0.9168835573580829], [0.9694649594067601], [0.9938202486868859], [0.9779909160865975]]}, "epsilon": {"dims": ["iter", "suggestion"], "attrs": {}, "data": [[2.8124910539910728e-08], [2.8124910539910728e-08], [6.704537253437715e-07], [3.261568152506934e-07], [3.261568152506934e-07], [3.261568152506934e-07], [3.261568152506934e-07], [3.0152760058296715e-07], [3.1545339754299086e-07], [2.552462610769146e-08], [9.544606637551236e-07], [4.161676566976903e-07], [6.284221995283824e-07], [4.5195275336137777e-07], [9.538739745348812e-08], [9.222432989791352e-07], [5.309404262082419e-07], [6.525284614039274e-07], [7.046942180072003e-07], [3.0700284262050084e-07]]}, "hidden_layer_sizes": {"dims": ["iter", "suggestion"], "attrs": {}, "data": [[107], [107], [70], [149], [149], [127], [199], [164], [177], [146], [91], [96], [58], [89], [117], [129], [54], [117], [158], [163]]}, "learning_rate_init": {"dims": ["iter", "suggestion"], "attrs": {}, "data": [[0.07224720561884694], [0.07224720561884694], [0.08851647914630083], [0.07004731983022998], [0.07004731983022998], [0.07004731983022998], [0.07004731983022998], [0.008390906370449192], [0.03975128533729649], [0.0650976445333417], [0.029749210645983504], [0.059127253692848596], [0.05723503996820372], [0.06484332120790907], [0.05974545705754191], [0.023096476723094717], [0.0004938898968382299], [0.06893014812860059], [0.017010510229858933], [0.06477179962036243]]}, "tol": {"dims": ["iter", "suggestion"], "attrs": {}, "data": [[0.09528608739248383], [0.09528608739248383], [0.06301033000086324], [0.012321442635164482], [0.012321442635164482], [0.012321442635164482], [0.012321442635164482], [0.05985684259818463], [0.029776725581010566], [0.03763704202064926], [0.07266139069648829], [0.038602115934346974], [0.014407303672563088], [0.07366473344873851], [0.07321874298978696], [0.053536564314831496], [0.003765658909983639], [0.02049028621847986], [0.09263211077231641], [0.0709071241792129]]}, "validation_fraction": {"dims": ["iter", "suggestion"], "attrs": {}, "data": [[0.23306518135982968], [0.5566516912505118], [0.6040754924246183], [0.47009016451801244], [0.47009016451801244], [0.47009016451801244], [0.47009016451801244], [0.2532947489895664], [0.6790562876241331], [0.17440042884027357], [0.2094435753321708], [0.13329266991245003], [0.8118577652981364], [0.6089370435447721], [0.8241565607088367], [0.40218115054696], [0.40515665353583685], [0.7124053926765307], [0.8355214256166178], [0.7916063705891562]]}}}}
