# Supplementary material
Source: ML conference proceedings conference paper supplement (https://proceedings.neurips.cc/paper_files/paper/2022/hash/31a57804448363bcab777f818f75f5b4-Abstract.html)
Supplement: Supplementary file 1 [file 31a57804448363bcab777f818f75f5b4-Supplemental-Conference.zip › trading_off_resource_budgets_f-Supplementary Material/code_and_data/experiments/base_results/bo_20220228_124924_b7rkpeqg/suggest_log/0994232f8aa558409cbde074a74c8602.json]

{"meta": {"args": {"--uuid": "0994232f8aa558409cbde074a74c8602", "-db-root": "/home/damon_falck/blackboxbandits/experiments/saved_results", "--opt-root": "/home/damon_falck/blackboxbandits/experiments", "--data-root": "/home/damon_falck/blackboxbandits/experiments/penn_datasets", "--db": "bo_20220228_124924_b7rkpeqg", "--opt": "OpenTuner-BanditA", "--data": "reg-560-bodyfat", "--classifier": "lasso", "--metric": "mse", "--calls": 20, "--suggestions": 1, "--jobs-file": null, "--verbose": false, "dry_run": false, "rev": "bd14afd", "opt_rev": "0.8.7"}, "signature": [[{"alpha": 1.5676677195506077, "fit_intercept": true, "max_iter": 423, "normalize": true, "positive": false, "tol": 0.0038333321561566623}, {"alpha": 0.5627932047415171, "fit_intercept": true, "max_iter": 3989, "normalize": false, "positive": true, "tol": 0.001304907355036239}, {"alpha": 1.871450068624068, "fit_intercept": true, "max_iter": 16, "normalize": false, "positive": false, "tol": 0.021403233140986057}, {"alpha": 12.960656597279737, "fit_intercept": true, "max_iter": 4378, "normalize": true, "positive": false, "tol": 0.013246974647468445}, {"alpha": 0.029723346443356558, "fit_intercept": true, "max_iter": 24, "normalize": true, "positive": true, "tol": 0.00045566719139214756}], [0.9900597471600434, 0.6838457806037134, 0.9900597471600434, 0.9900597471600434, 0.5049273080771467]]},
"data": {"coords": {"iter": {"dims": ["iter"], "attrs": {}, "data": [0, 1, 2, 3, 4, 5, 6, 7, 8, 9, 10, 11, 12, 13, 14, 15, 16, 17, 18, 19]}, "suggestion": {"dims": ["suggestion"], "attrs": {}, "data": [0]}}, "attrs": {}, "dims": {"iter": 20, "suggestion": 1}, "data_vars": {"alpha": {"dims": ["iter", "suggestion"], "attrs": {}, "data": [[6.6492122864600764], [6.1055141237723145], [13.034423061876542], [7.522391124963409], [0.14805513396978442], [6.6492122864600764], [6.6492122864600764], [34.19072952126536], [6.6492122864600764], [6.6492122864600764], [47.274591519342685], [47.274591519342685], [6.6492122864600764], [6.6492122864600764], [6.6492122864600764], [6.6492122864600764], [50.31311758394674], [22.54066558225348], [0.1326868017006737], [0.1326868017006737]]}, "fit_intercept": {"dims": ["iter", "suggestion"], "attrs": {}, "data": [[1], [1], [1], [1], [1], [0], [0], [0], [1], [0], [0], [0], [0], [0], [1], [1], [0], [0], [0], [0]]}, "max_iter": {"dims": ["iter", "suggestion"], "attrs": {}, "data": [[106], [60], [2177], [16], [106], [106], [106], [93], [457], [106], [106], [106], [106], [106], [40], [40], [106], [106], [106], [106]]}, "normalize": {"dims": ["iter", "suggestion"], "attrs": {}, "data": [[1], [1], [1], [1], [1], [1], [1], [0], [1], [1], [1], [1], [0], [1], [1], [1], [1], [1], [1], [1]]}, "positive": {"dims": ["iter", "suggestion"], "attrs": {}, "data": [[0], [0], [0], [0], [0], [0], [0], [0], [0], [0], [0], [0], [1], [0], [0], [0], [0], [0], [0], [0]]}, "tol": {"dims": ["iter", "suggestion"], "attrs": {}, "data": [[0.0645399025357997], [0.08735358126713592], [0.07043657098598526], [0.09515784783392493], [0.0645399025357997], [0.0645399025357997], [0.06037135229099382], [0.08435816523817634], [0.0645399025357997], [0.07636365244376846], [0.0645399025357997], [0.0645399025357997], [0.0645399025357997], [0.030652826919822452], [0.0645399025357997], [0.0645399025357997], [0.0645399025357997], [0.0645399025357997], [0.0645399025357997], [0.0682895604450277]]}}}}
