# Supplementary material
Source: ML conference proceedings conference paper supplement (https://proceedings.neurips.cc/paper_files/paper/2022/hash/31a57804448363bcab777f818f75f5b4-Abstract.html)
Supplement: Supplementary file 1 [file 31a57804448363bcab777f818f75f5b4-Supplemental-Conference.zip › trading_off_resource_budgets_f-Supplementary Material/code_and_data/experiments/base_results/bo_20220228_124924_b7rkpeqg/suggest_log/047207897cc85fdda2bb87c784cbd889.json]

{"meta": {"args": {"--uuid": "047207897cc85fdda2bb87c784cbd889", "-db-root": "/home/damon_falck/blackboxbandits/experiments/saved_results", "--opt-root": "/home/damon_falck/blackboxbandits/experiments", "--data-root": "/home/damon_falck/blackboxbandits/experiments/penn_datasets", "--db": "bo_20220228_124924_b7rkpeqg", "--opt": "OpenTuner-GA-DE", "--data": "reg-637-fri-c1-500-50", "--classifier": "MLP-adam", "--metric": "mse", "--calls": 20, "--suggestions": 1, "--jobs-file": null, "--verbose": false, "dry_run": false, "rev": "bd14afd", "opt_rev": "0.8.7"}, "signature": [[{"alpha": 0.019628224813442792, "batch_size": 182, "beta_1": 0.9410202200271762, "beta_2": 0.9998021557676793, "epsilon": 1.8662266976518e-08, "hidden_layer_sizes": 147, "learning_rate_init": 0.0005627932047415167, "tol": 0.03690557729213761, "validation_fraction": 0.8846827852548593}, {"alpha": 0.001998246739232944, "batch_size": 200, "beta_1": 0.919111482530466, "beta_2": 0.9998488260436156, "epsilon": 5.981221901152555e-07, "hidden_layer_sizes": 61, "learning_rate_init": 2.2310905607443014e-05, "tol": 1.2046852412030316e-05, "validation_fraction": 0.8117896445826539}, {"alpha": 0.46659545670218433, "batch_size": 219, "beta_1": 0.9889789783750891, "beta_2": 0.9999896868093284, "epsilon": 2.4234724484675948e-08, "hidden_layer_sizes": 167, "learning_rate_init": 2.972334644335654e-05, "tol": 0.0036281404040243792, "validation_fraction": 0.17260651658522078}, {"alpha": 4.656005689076002, "batch_size": 135, "beta_1": 0.870503881627747, "beta_2": 0.9948873266941017, "epsilon": 2.1023308743480125e-07, "hidden_layer_sizes": 118, "learning_rate_init": 0.001878173875716191, "tol": 1.1889379831773006e-05, "validation_fraction": 0.6264327093752792}, {"alpha": 0.04705159350400542, "batch_size": 158, "beta_1": 0.9870884262730957, "beta_2": 0.9999596874382349, "epsilon": 1.1981845126013875e-08, "hidden_layer_sizes": 116, "learning_rate_init": 0.006173405204074311, "tol": 1.7414134181586194e-05, "validation_fraction": 0.6754299026638921}], [1.1689829559872345, 1.798796565496204, 1.370565546550155, 0.9154740601532888, 1.227175877846157]]},
"data": {"coords": {"iter": {"dims": ["iter"], "attrs": {}, "data": [0, 1, 2, 3, 4, 5, 6, 7, 8, 9, 10, 11, 12, 13, 14, 15, 16, 17, 18, 19]}, "suggestion": {"dims": ["suggestion"], "attrs": {}, "data": [0]}}, "attrs": {}, "dims": {"iter": 20, "suggestion": 1}, "data_vars": {"alpha": {"dims": ["iter", "suggestion"], "attrs": {}, "data": [[1.4501864241804343], [1.4501864241804343], [9.782504388030224], [1.4501864241804343], [1.4501864241804343], [1.7576408752029007], [6.884429906841365], [5.276841054545837], [0.14489124490531363], [6.884429906841365], [3.020025812407782], [6.884429906841365], [6.884429906841365], [3.091993069797726], [0.7680227599542632], [0.11701321528031243], [2.3909886727228655], [1.4444737781461439], [6.6344578782361605], [6.429708808655176]]}, "batch_size": {"dims": ["iter", "suggestion"], "attrs": {}, "data": [[196], [196], [120], [196], [196], [83], [132], [187], [221], [192], [201], [192], [192], [72], [144], [192], [192], [31], [188], [192]]}, "beta_1": {"dims": ["iter", "suggestion"], "attrs": {}, "data": [[0.7259521242252064], [0.7259521242252064], [0.5532170339596886], [0.7259521242252064], [0.6290300864055247], [0.7876677622515931], [0.9073098487259837], [0.7632004460012467], [0.9816484154586549], [0.9073098487259837], [0.7947367496656113], [0.9073098487259837], [0.9073098487259837], [0.854755137412923], [0.651812659544609], [0.6374323887566379], [0.9073098487259837], [0.9196980574626451], [0.8382623927490714], [0.9073098487259837]]}, "beta_2": {"dims": ["iter", "suggestion"], "attrs": {}, "data": [[0.9853442341138821], [0.9670535715267782], [0.9223078825788195], [0.9853442341138821], [0.9853442341138821], [0.9780485241763806], [0.9542367141325185], [0.9644285810635818], [0.9802573149225623], [0.9542367141325185], [0.9418827031328985], [0.9542367141325185], [0.9542367141325185], [0.9875703404915976], [0.9368403116824257], [0.9542367141325185], [0.9542367141325185], [0.918682972074701], [0.9089078646995671], [0.9111955175298122]]}, "epsilon": {"dims": ["iter", "suggestion"], "attrs": {}, "data": [[9.174764611657716e-07], [9.174764611657716e-07], [7.681276724963149e-07], [9.174764611657716e-07], [9.174764611657716e-07], [8.778028787464743e-07], [2.5123625926934303e-07], [5.056275434508939e-08], [7.702254453406377e-07], [2.5123625926934303e-07], [3.312957551909458e-07], [2.5123625926934303e-07], [2.5123625926934303e-07], [4.215651131009202e-08], [4.24339225152105e-08], [2.5123625926934303e-07], [6.576545858177619e-07], [4.171065640154359e-08], [3.173763528934993e-07], [2.5123625926934303e-07]]}, "hidden_layer_sizes": {"dims": ["iter", "suggestion"], "attrs": {}, "data": [[70], [70], [101], [70], [70], [121], [61], [193], [94], [61], [133], [152], [61], [169], [70], [61], [118], [164], [180], [181]]}, "learning_rate_init": {"dims": ["iter", "suggestion"], "attrs": {}, "data": [[0.01693331788416812], [0.01693331788416812], [0.028837420161876338], [0.01693331788416812], [0.01693331788416812], [0.050133975548097336], [0.017697889239019316], [0.017718405689330186], [0.02640482067666976], [0.017697889239019316], [0.045279428973520046], [0.017697889239019316], [0.017697889239019316], [0.09133079454254649], [0.03179329227153598], [0.017697889239019316], [0.017697889239019316], [0.049749401464079517], [0.08230169698900484], [0.017697889239019316]]}, "tol": {"dims": ["iter", "suggestion"], "attrs": {}, "data": [[0.007666236176755593], [0.007666236176755593], [0.04542287426822982], [0.007666236176755593], [0.00692722207086709], [0.04813235774261753], [0.06454568534235976], [0.05259423276322466], [0.0380319652465732], [0.06454568534235976], [0.015069683569040638], [0.06454568534235976], [0.06454568534235976], [0.07729868435946867], [0.05586231460371998], [0.06454568534235976], [0.06454568534235976], [0.06933656131559578], [0.018702161526384643], [0.06454568534235976]]}, "validation_fraction": {"dims": ["iter", "suggestion"], "attrs": {}, "data": [[0.4369849789821011], [0.4369849789821011], [0.892621437745377], [0.5416657907331851], [0.4369849789821011], [0.5801266294824472], [0.2905852466663106], [0.49452900807697786], [0.7523866692123053], [0.2905852466663106], [0.604184718187758], [0.2905852466663106], [0.6780701050025146], [0.8868326098044393], [0.44402390697210214], [0.2905852466663106], [0.2905852466663106], [0.38063154531176213], [0.32815898711561486], [0.3896311408604233]]}}}}
