# Supplementary material
Source: ML conference proceedings conference paper supplement (https://proceedings.neurips.cc/paper_files/paper/2022/hash/31a57804448363bcab777f818f75f5b4-Abstract.html)
Supplement: Supplementary file 1 [file 31a57804448363bcab777f818f75f5b4-Supplemental-Conference.zip › trading_off_resource_budgets_f-Supplementary Material/code_and_data/experiments/base_results/bo_20220228_124924_b7rkpeqg/suggest_log/0128675927e6589ea8ba154ded8cd09a.json]

{"meta": {"args": {"--uuid": "0128675927e6589ea8ba154ded8cd09a", "-db-root": "/home/damon_falck/blackboxbandits/experiments/saved_results", "--opt-root": "/home/damon_falck/blackboxbandits/experiments", "--data-root": "/home/damon_falck/blackboxbandits/experiments/penn_datasets", "--db": "bo_20220228_124924_b7rkpeqg", "--opt": "HyperOpt", "--data": "clf-analcatdata-creditscore", "--classifier": "MLP-adam", "--metric": "nll", "--calls": 20, "--suggestions": 1, "--jobs-file": null, "--verbose": false, "dry_run": false, "rev": "bd14afd", "opt_rev": "0.2.7"}, "signature": [[{"alpha": 0.019628224813442792, "batch_size": 182, "beta_1": 0.9410202200271762, "beta_2": 0.9998021557676793, "epsilon": 1.8662266976518e-08, "hidden_layer_sizes": 147, "learning_rate_init": 0.0005627932047415167, "tol": 0.03690557729213761, "validation_fraction": 0.8846827852548593}, {"alpha": 0.001998246739232944, "batch_size": 200, "beta_1": 0.919111482530466, "beta_2": 0.9998488260436156, "epsilon": 5.981221901152555e-07, "hidden_layer_sizes": 61, "learning_rate_init": 2.2310905607443014e-05, "tol": 1.2046852412030316e-05, "validation_fraction": 0.8117896445826539}, {"alpha": 0.46659545670218433, "batch_size": 219, "beta_1": 0.9889789783750891, "beta_2": 0.9999896868093284, "epsilon": 2.4234724484675948e-08, "hidden_layer_sizes": 167, "learning_rate_init": 2.972334644335654e-05, "tol": 0.0036281404040243792, "validation_fraction": 0.17260651658522078}, {"alpha": 4.656005689076002, "batch_size": 135, "beta_1": 0.870503881627747, "beta_2": 0.9948873266941017, "epsilon": 2.1023308743480125e-07, "hidden_layer_sizes": 118, "learning_rate_init": 0.001878173875716191, "tol": 1.1889379831773006e-05, "validation_fraction": 0.6264327093752792}, {"alpha": 0.04705159350400542, "batch_size": 158, "beta_1": 0.9870884262730957, "beta_2": 0.9999596874382349, "epsilon": 1.1981845126013875e-08, "hidden_layer_sizes": 116, "learning_rate_init": 0.006173405204074311, "tol": 1.7414134181586194e-05, "validation_fraction": 0.6754299026638921}], [0.6635810251372296, 0.8200608379864811, 0.7189465524243107, 0.609868902456021, 0.5142279804683989]]},
"data": {"coords": {"iter": {"dims": ["iter"], "attrs": {}, "data": [0, 1, 2, 3, 4, 5, 6, 7, 8, 9, 10, 11, 12, 13, 14, 15, 16, 17, 18, 19]}, "suggestion": {"dims": ["suggestion"], "attrs": {}, "data": [0]}}, "attrs": {}, "dims": {"iter": 20, "suggestion": 1}, "data_vars": {"alpha": {"dims": ["iter", "suggestion"], "attrs": {}, "data": [[0.778554896111333], [0.0004965383989392677], [1.2321527544030269], [0.009700315639221736], [0.27176405380325863], [6.295470063054289], [0.08307312301705418], [1.9532331786713952], [2.569797984720644], [0.011295498730397846], [0.03382503083324512], [0.03178499362317398], [0.430034833046497], [0.00028532737203205315], [0.04191995861647147], [0.0033759570907601786], [0.0016580236140175775], [0.0009407226936546734], [0.1427209343289828], [0.053068473399470385]]}, "batch_size": {"dims": ["iter", "suggestion"], "attrs": {}, "data": [[78], [185], [95], [42], [179], [82], [207], [20], [60], [223], [55], [94], [241], [52], [229], [197], [81], [197], [235], [28]]}, "beta_1": {"dims": ["iter", "suggestion"], "attrs": {}, "data": [[0.6214923613042769], [0.7847223010803565], [0.8236948032020397], [0.5266091665149886], [0.8374878048266483], [0.5928439075752304], [0.6652626213932026], [0.873328849430156], [0.6665709503112011], [0.8623837542740805], [0.9379787587156407], [0.7532154950689356], [0.8765484201078133], [0.7319876847798813], [0.8309554204294116], [0.8616377260938678], [0.9371027159444727], [0.9535929069910096], [0.5366358952305265], [0.5482147297734061]]}, "beta_2": {"dims": ["iter", "suggestion"], "attrs": {}, "data": [[0.9034797685059944], [0.9907964317945407], [0.9946660255037737], [0.9398695669857923], [0.9410816753860762], [0.9972372538918772], [0.9668923194451124], [0.9283271777464642], [0.9037748810624311], [0.9854199918301003], [0.970027253878523], [0.9011168293609886], [0.9471483089157949], [0.9499579540034911], [0.9163184232327419], [0.9558935515412457], [0.9564248311520807], [0.9571717865082263], [0.976900880730582], [0.9772819380965081]]}, "epsilon": {"dims": ["iter", "suggestion"], "attrs": {}, "data": [[4.827124524310619e-07], [1.803311522480947e-08], [3.546375062571172e-09], [2.457457171857475e-09], [1.092389193653155e-08], [1.0088631559179436e-08], [2.3640210510020004e-08], [7.08511937366889e-09], [5.993857769737637e-07], [1.9193280606471632e-09], [4.46051901137623e-07], [3.0812444142592464e-07], [3.133860342098737e-07], [1.5150949596358794e-07], [1.375271447156422e-07], [5.9141633974522655e-08], [5.954323249468902e-08], [3.469128987245293e-09], [2.5497930046775037e-08], [7.432190209957763e-08]]}, "hidden_layer_sizes": {"dims": ["iter", "suggestion"], "attrs": {}, "data": [[127], [151], [82], [138], [84], [103], [101], [62], [73], [125], [158], [141], [101], [109], [186], [85], [158], [102], [174], [152]]}, "learning_rate_init": {"dims": ["iter", "suggestion"], "attrs": {}, "data": [[2.794467605060862e-05], [0.014697954379356917], [9.86774186213028e-05], [0.001848931388205363], [0.0010471257184394838], [0.08400793879768186], [0.00013598988311201295], [2.083537095347437e-05], [0.04618622138999569], [0.08306910032077512], [1.0457379430791541e-05], [0.0004586316308698496], [0.0005924989884064708], [2.3886314171017975e-05], [0.04329214748194955], [4.516434520049395e-05], [0.03629795569362531], [0.00021833112654210724], [0.007679427989702264], [0.005814484930855474]]}, "tol": {"dims": ["iter", "suggestion"], "attrs": {}, "data": [[0.0006627108266714593], [4.974900129578701e-05], [0.026555861110816488], [0.0010310598527284067], [0.013697374153379665], [0.0002491836119880487], [3.1760347067815955e-05], [0.016999568940528734], [3.9969702688777936e-05], [0.0002102938051241297], [0.0026389843890146265], [0.001341675812225404], [0.009897789507560378], [4.5133930558841426e-05], [9.376132374261491e-05], [0.00010639008688479404], [0.0030698003092450763], [0.0010107972839684097], [0.008625567218710986], [0.0011906389062428004]]}, "validation_fraction": {"dims": ["iter", "suggestion"], "attrs": {}, "data": [[0.28858139275626815], [0.2125666770207339], [0.23166278390967993], [0.2869574222644132], [0.8110503790997726], [0.18048989772132115], [0.3400403926805302], [0.45990686775276163], [0.12323576175982136], [0.18175390718461773], [0.6057499029843797], [0.49948861344586043], [0.310567128325926], [0.4542699541612771], [0.3943810789730209], [0.10634671587691122], [0.374438589413707], [0.1977009187289401], [0.24408780451069118], [0.2528574772972699]]}}}}
