# Supplementary material
Source: ML conference proceedings conference paper supplement (https://proceedings.neurips.cc/paper_files/paper/2022/hash/31a57804448363bcab777f818f75f5b4-Abstract.html)
Supplement: Supplementary file 1 [file 31a57804448363bcab777f818f75f5b4-Supplemental-Conference.zip › trading_off_resource_budgets_f-Supplementary Material/code_and_data/experiments/base_results/bo_20220228_124924_b7rkpeqg/suggest_log/0146409341ca54b1b67150cb1bf2e6f3.json]

{"meta": {"args": {"--uuid": "0146409341ca54b1b67150cb1bf2e6f3", "-db-root": "/home/damon_falck/blackboxbandits/experiments/saved_results", "--opt-root": "/home/damon_falck/blackboxbandits/experiments", "--data-root": "/home/damon_falck/blackboxbandits/experiments/penn_datasets", "--db": "bo_20220228_124924_b7rkpeqg", "--opt": "Scikit-GBRT-Hedge", "--data": "reg-608-fri-c3-1000-10", "--classifier": "MLP-adam", "--metric": "mse", "--calls": 20, "--suggestions": 1, "--jobs-file": null, "--verbose": false, "dry_run": false, "rev": "bd14afd", "opt_rev": "0.9.0"}, "signature": [[{"alpha": 0.019628224813442792, "batch_size": 182, "beta_1": 0.9410202200271762, "beta_2": 0.9998021557676793, "epsilon": 1.8662266976518e-08, "hidden_layer_sizes": 147, "learning_rate_init": 0.0005627932047415167, "tol": 0.03690557729213761, "validation_fraction": 0.8846827852548593}, {"alpha": 0.001998246739232944, "batch_size": 200, "beta_1": 0.919111482530466, "beta_2": 0.9998488260436156, "epsilon": 5.981221901152555e-07, "hidden_layer_sizes": 61, "learning_rate_init": 2.2310905607443014e-05, "tol": 1.2046852412030316e-05, "validation_fraction": 0.8117896445826539}, {"alpha": 0.46659545670218433, "batch_size": 219, "beta_1": 0.9889789783750891, "beta_2": 0.9999896868093284, "epsilon": 2.4234724484675948e-08, "hidden_layer_sizes": 167, "learning_rate_init": 2.972334644335654e-05, "tol": 0.0036281404040243792, "validation_fraction": 0.17260651658522078}, {"alpha": 4.656005689076002, "batch_size": 135, "beta_1": 0.870503881627747, "beta_2": 0.9948873266941017, "epsilon": 2.1023308743480125e-07, "hidden_layer_sizes": 118, "learning_rate_init": 0.001878173875716191, "tol": 1.1889379831773006e-05, "validation_fraction": 0.6264327093752792}, {"alpha": 0.04705159350400542, "batch_size": 158, "beta_1": 0.9870884262730957, "beta_2": 0.9999596874382349, "epsilon": 1.1981845126013875e-08, "hidden_layer_sizes": 116, "learning_rate_init": 0.006173405204074311, "tol": 1.7414134181586194e-05, "validation_fraction": 0.6754299026638921}], [0.9725192054033472, 1.229126612450491, 1.0317841070230456, 0.2967429810670315, 0.6439992146574699]]},
"data": {"coords": {"iter": {"dims": ["iter"], "attrs": {}, "data": [0, 1, 2, 3, 4, 5, 6, 7, 8, 9, 10, 11, 12, 13, 14, 15, 16, 17, 18, 19]}, "suggestion": {"dims": ["suggestion"], "attrs": {}, "data": [0]}}, "attrs": {}, "dims": {"iter": 20, "suggestion": 1}, "data_vars": {"alpha": {"dims": ["iter", "suggestion"], "attrs": {}, "data": [[0.0001807517012626403], [0.4308949985381924], [0.024141174570678242], [0.0004791349352729525], [0.00513185957864517], [3.3106139355461304], [0.016995486877678382], [0.007175551145866093], [0.0003281827211130882], [0.0018444126584629523], [0.0011967927826983295], [0.012063770100898086], [2.360069212558579e-05], [0.0007804925863106953], [2.1037753836614945e-05], [7.58297734588531e-05], [1.2122354009154847e-05], [9.184503811022813], [1.705049657870478e-05], [9.541270019880759e-05]]}, "batch_size": {"dims": ["iter", "suggestion"], "attrs": {}, "data": [[142], [74], [72], [137], [102], [33], [138], [61], [60], [68], [53], [67], [48], [48], [46], [72], [31], [21], [66], [66]]}, "beta_1": {"dims": ["iter", "suggestion"], "attrs": {}, "data": [[0.7716397848852355], [0.6698281383463348], [0.5478832815854021], [0.7228837504537743], [0.6712748540072585], [0.6036174336320712], [0.5103642418722284], [0.5045016203901947], [0.5711533927701675], [0.5776089339867407], [0.5562625531758023], [0.5252235229531788], [0.5190075087428453], [0.5321579568963423], [0.5408338749512134], [0.5521952913546436], [0.5081920547045079], [0.5869132349927965], [0.5503316222071722], [0.5395225912254554]]}, "beta_2": {"dims": ["iter", "suggestion"], "attrs": {}, "data": [[0.9602620431144668], [0.9625583911948032], [0.9848320745685474], [0.9014082335207655], [0.9239251801517361], [0.9871742333006542], [0.9034436924090128], [0.9831576617098333], [0.9967652564834474], [0.9739826496287588], [0.9773154335044917], [0.9797545504132417], [0.9900629255771292], [0.9183948425768557], [0.9130499086520388], [0.9260220445431409], [0.9353328335117564], [0.922359271042691], [0.9299957471108434], [0.9788870955491836]]}, "epsilon": {"dims": ["iter", "suggestion"], "attrs": {}, "data": [[1.4997963726869386e-07], [1.327084538956803e-07], [6.9255599702876706e-09], [1.7875422920467018e-09], [1.4498808008370086e-07], [2.1410849857856725e-08], [2.1904394096010055e-09], [4.449256205043937e-09], [4.936555481921849e-09], [3.4348231094328266e-09], [4.322763248711938e-09], [2.2048141155566944e-09], [3.6348208551648346e-09], [2.0410398248866243e-09], [1.068772321213749e-07], [1.0401353137168559e-07], [1.1011509777461324e-08], [3.958291216329842e-08], [2.511191101117073e-09], [3.229591364300124e-09]]}, "hidden_layer_sizes": {"dims": ["iter", "suggestion"], "attrs": {}, "data": [[155], [65], [51], [115], [175], [52], [50], [70], [170], [107], [179], [96], [183], [147], [180], [186], [97], [124], [149], [159]]}, "learning_rate_init": {"dims": ["iter", "suggestion"], "attrs": {}, "data": [[0.002906633442144346], [3.0657518885848786e-05], [0.011799247173615884], [0.0037271545774699307], [1.4749795074140454e-05], [0.08224665577002754], [1.755089477904531e-05], [0.02338692175305761], [0.025081289520007703], [0.004840751079396369], [0.03843335593520343], [0.02727905524096242], [0.013172506552688607], [0.01623980558237152], [0.0045167359212657686], [0.009227641829013408], [0.02246476564533779], [0.017910051633517683], [0.07062669283424], [0.017504657544999885]]}, "tol": {"dims": ["iter", "suggestion"], "attrs": {}, "data": [[0.04440482750486537], [0.014235850838262667], [4.242517028684213e-05], [0.001594226623477202], [0.010417190452267754], [2.8613278434289722e-05], [0.002153703757399086], [0.0005219678799993267], [6.203409144994654e-05], [0.0007135997294175587], [5.328331487107336e-05], [7.939141945069115e-05], [0.0009595086130200903], [0.00011048808707622046], [8.656758902745993e-05], [0.00010194932487055217], [0.00041199178670488787], [0.000313044579015539], [0.0005820726744194359], [0.00012082980011026265]]}, "validation_fraction": {"dims": ["iter", "suggestion"], "attrs": {}, "data": [[0.6853003737363962], [0.1386280667659547], [0.3372952212496059], [0.5938891218048449], [0.11838121695291089], [0.7095639272623723], [0.10817132451289055], [0.2786547528168471], [0.1530132663225344], [0.13060329762363537], [0.2085077104069876], [0.25074710011592716], [0.14551820010898991], [0.15709820515280196], [0.10163453218793748], [0.3216076776950312], [0.16067590054859837], [0.8310050488019584], [0.23254792735810928], [0.14626056496816267]]}}}}
