# Supplementary material
Source: ML conference proceedings conference paper supplement (https://proceedings.neurips.cc/paper_files/paper/2022/hash/31a57804448363bcab777f818f75f5b4-Abstract.html)
Supplement: Supplementary file 1 [file 31a57804448363bcab777f818f75f5b4-Supplemental-Conference.zip › trading_off_resource_budgets_f-Supplementary Material/code_and_data/experiments/base_results/bo_20220228_124924_b7rkpeqg/suggest_log/0403618472bf5affb62bc79d3463621e.json]

{"meta": {"args": {"--uuid": "0403618472bf5affb62bc79d3463621e", "-db-root": "/home/damon_falck/blackboxbandits/experiments/saved_results", "--opt-root": "/home/damon_falck/blackboxbandits/experiments", "--data-root": "/home/damon_falck/blackboxbandits/experiments/penn_datasets", "--db": "bo_20220228_124924_b7rkpeqg", "--opt": "Scikit-GBRT-Hedge", "--data": "clf-GAMETES-Epistasis-2-Way-1000atts-0.4H-EDM-1-EDM-1-1", "--classifier": "MLP-adam", "--metric": "nll", "--calls": 20, "--suggestions": 1, "--jobs-file": null, "--verbose": false, "dry_run": false, "rev": "bd14afd", "opt_rev": "0.9.0"}, "signature": [[{"alpha": 0.019628224813442792, "batch_size": 182, "beta_1": 0.9410202200271762, "beta_2": 0.9998021557676793, "epsilon": 1.8662266976518e-08, "hidden_layer_sizes": 147, "learning_rate_init": 0.0005627932047415167, "tol": 0.03690557729213761, "validation_fraction": 0.8846827852548593}, {"alpha": 0.001998246739232944, "batch_size": 200, "beta_1": 0.919111482530466, "beta_2": 0.9998488260436156, "epsilon": 5.981221901152555e-07, "hidden_layer_sizes": 61, "learning_rate_init": 2.2310905607443014e-05, "tol": 1.2046852412030316e-05, "validation_fraction": 0.8117896445826539}, {"alpha": 0.46659545670218433, "batch_size": 219, "beta_1": 0.9889789783750891, "beta_2": 0.9999896868093284, "epsilon": 2.4234724484675948e-08, "hidden_layer_sizes": 167, "learning_rate_init": 2.972334644335654e-05, "tol": 0.0036281404040243792, "validation_fraction": 0.17260651658522078}, {"alpha": 4.656005689076002, "batch_size": 135, "beta_1": 0.870503881627747, "beta_2": 0.9948873266941017, "epsilon": 2.1023308743480125e-07, "hidden_layer_sizes": 118, "learning_rate_init": 0.001878173875716191, "tol": 1.1889379831773006e-05, "validation_fraction": 0.6264327093752792}, {"alpha": 0.04705159350400542, "batch_size": 158, "beta_1": 0.9870884262730957, "beta_2": 0.9999596874382349, "epsilon": 1.1981845126013875e-08, "hidden_layer_sizes": 116, "learning_rate_init": 0.006173405204074311, "tol": 1.7414134181586194e-05, "validation_fraction": 0.6754299026638921}], [1.058854782535762, 0.8522882810051516, 0.9198776967280861, 0.755892444327836, 0.9853318451387896]]},
"data": {"coords": {"iter": {"dims": ["iter"], "attrs": {}, "data": [0, 1, 2, 3, 4, 5, 6, 7, 8, 9, 10, 11, 12, 13, 14, 15, 16, 17, 18, 19]}, "suggestion": {"dims": ["suggestion"], "attrs": {}, "data": [0]}}, "attrs": {}, "dims": {"iter": 20, "suggestion": 1}, "data_vars": {"alpha": {"dims": ["iter", "suggestion"], "attrs": {}, "data": [[6.523187378730271e-05], [0.027025229279864855], [0.0027127480069453463], [0.9382277588170533], [0.8502461705292157], [2.0546286437085324], [4.523746579748709], [4.31189451893442], [5.968757463405001], [9.833015028096254], [0.0003169757181639371], [9.93162548265935], [5.712006540139137], [0.14480779450162087], [2.624677776313368e-05], [5.662845873359059], [3.4981877741283247], [6.581539822137075], [0.00012449682105443243], [8.684039390769955]]}, "batch_size": {"dims": ["iter", "suggestion"], "attrs": {}, "data": [[121], [61], [157], [163], [75], [220], [212], [187], [223], [29], [218], [210], [207], [244], [66], [153], [240], [245], [200], [222]]}, "beta_1": {"dims": ["iter", "suggestion"], "attrs": {}, "data": [[0.8895334714288902], [0.6900196482323644], [0.6270081780222518], [0.5453911708206551], [0.8187670489062597], [0.5146266719911448], [0.5031602638087683], [0.5029259103699589], [0.7483256988862553], [0.783560548261954], [0.5155617669631974], [0.8508304718101624], [0.595599947343571], [0.7326142619702504], [0.8130202858439896], [0.5304214116275756], [0.8663312893625909], [0.5711356152303063], [0.5147764651101633], [0.6403889601909211]]}, "beta_2": {"dims": ["iter", "suggestion"], "attrs": {}, "data": [[0.9305272755262829], [0.9967606757360439], [0.9906381873464257], [0.9838583884786346], [0.9129730763818413], [0.9211158674270844], [0.9034921723997504], [0.9846698297328514], [0.9011359010480046], [0.9001640179391318], [0.9077312481243647], [0.9029882810598292], [0.9685090952515577], [0.904473370073703], [0.9268277090957916], [0.9685481253567978], [0.9024507571491402], [0.96389437942302], [0.9035731345666457], [0.9010378228812496]]}, "epsilon": {"dims": ["iter", "suggestion"], "attrs": {}, "data": [[7.419616332683487e-09], [3.643509605729632e-09], [8.019586574740447e-07], [2.2016345460838995e-07], [1.477510503171957e-07], [8.507955110192974e-08], [1.4217943008833298e-08], [6.044797801368048e-07], [5.252592251351445e-09], [1.9545041937119153e-08], [8.406319358100558e-09], [2.56380495143107e-09], [1.3640483635394486e-09], [2.097718117557889e-09], [1.1777046773998919e-09], [1.5018214436696835e-09], [2.2717696980912048e-08], [4.1396730319091234e-09], [4.238511487417581e-09], [1.1974762763673613e-08]]}, "hidden_layer_sizes": {"dims": ["iter", "suggestion"], "attrs": {}, "data": [[65], [178], [78], [82], [167], [101], [162], [192], [189], [174], [192], [91], [185], [61], [171], [63], [108], [174], [54], [75]]}, "learning_rate_init": {"dims": ["iter", "suggestion"], "attrs": {}, "data": [[0.0008826636628160884], [3.3705121330316504e-05], [1.3310176270614075e-05], [0.0002116493244287568], [0.0010713537783911171], [0.0042216880740841975], [0.016024568883362053], [2.987495088515894e-05], [0.00874277624845208], [0.019993829776877567], [0.0070134872181747965], [0.00269729695755863], [0.04003303059751101], [0.044343855019996714], [0.04327206725734754], [0.0002921518743315009], [0.017538000303273817], [0.0003465854071347205], [0.003587682734879673], [0.00014116024702451687]]}, "tol": {"dims": ["iter", "suggestion"], "attrs": {}, "data": [[0.003236710068284635], [2.051473380418555e-05], [0.001533723918404834], [0.0004014333458128503], [0.004818535663061458], [0.0007439255526959688], [0.01926104641106094], [0.06638778845840912], [0.008739533093378273], [0.015178687320029733], [1.770597864871837e-05], [0.013116470080905532], [0.012294796400043976], [0.025113932829646475], [5.479090996224157e-05], [0.012307821839339731], [0.0003289169707411297], [0.006359241283121956], [3.679970765071755e-05], [0.00020448059698494067]]}, "validation_fraction": {"dims": ["iter", "suggestion"], "attrs": {}, "data": [[0.31789979011331176], [0.3131439808409307], [0.6534344937043387], [0.5783903356494631], [0.3195473278878911], [0.33430238707118076], [0.31622746549530223], [0.1165050530344599], [0.11492111445289056], [0.3275380950513375], [0.2479569766792808], [0.12154294419082007], [0.3167726293938619], [0.10281481518622224], [0.10393953175102612], [0.10241280117220938], [0.8865705743145245], [0.24736431235810927], [0.5275050009465585], [0.22128902756363658]]}}}}
