# Supplementary material
Source: ML conference proceedings conference paper supplement (https://proceedings.neurips.cc/paper_files/paper/2022/hash/31a57804448363bcab777f818f75f5b4-Abstract.html)
Supplement: Supplementary file 1 [file 31a57804448363bcab777f818f75f5b4-Supplemental-Conference.zip › trading_off_resource_budgets_f-Supplementary Material/code_and_data/experiments/base_results/bo_20220228_124924_b7rkpeqg/suggest_log/06781247803c52ed827ac3739dcc11ba.json]

{"meta": {"args": {"--uuid": "06781247803c52ed827ac3739dcc11ba", "-db-root": "/home/damon_falck/blackboxbandits/experiments/saved_results", "--opt-root": "/home/damon_falck/blackboxbandits/experiments", "--data-root": "/home/damon_falck/blackboxbandits/experiments/penn_datasets", "--db": "bo_20220228_124924_b7rkpeqg", "--opt": "RandomSearch", "--data": "clf-glass2", "--classifier": "lasso", "--metric": "nll", "--calls": 20, "--suggestions": 1, "--jobs-file": null, "--verbose": false, "dry_run": false, "rev": "bd14afd", "opt_rev": "0.0.8"}, "signature": [[{"C": 1.5676677195506077, "intercept_scaling": 7.257005721594282}, {"C": 2.57663857461359, "intercept_scaling": 1.5119336467641016}, {"C": 0.49501595537331966, "intercept_scaling": 3.833332156156665}, {"C": 0.5627932047415171, "intercept_scaling": 36.905577292137636}, {"C": 71.55682161754872, "intercept_scaling": 0.34179529120610125}], [0.5874613160386691, 0.5874949576881591, 0.5796603899207945, 0.57982357527112, 0.6324875142877505]]},
"data": {"coords": {"iter": {"dims": ["iter"], "attrs": {}, "data": [0, 1, 2, 3, 4, 5, 6, 7, 8, 9, 10, 11, 12, 13, 14, 15, 16, 17, 18, 19]}, "suggestion": {"dims": ["suggestion"], "attrs": {}, "data": [0]}}, "attrs": {}, "dims": {"iter": 20, "suggestion": 1}, "data_vars": {"C": {"dims": ["iter", "suggestion"], "attrs": {}, "data": [[2.0730860917252176], [0.019023181078500817], [10.551888473274598], [2.172966563460228], [0.065677532381813], [0.024856830476130794], [24.990528801714216], [9.819812954867576], [10.819355398476732], [0.018973445747599862], [1.5479286375780714], [91.9921736574732], [2.101432909966074], [0.6418389770157178], [9.506402524050156], [12.994218126033939], [7.626037347001556], [14.206470487296137], [0.2360289675542718], [15.357089334596008]]}, "intercept_scaling": {"dims": ["iter", "suggestion"], "attrs": {}, "data": [[0.7097185911501992], [1.4065807945561097], [0.011686325789547666], [1.6828737360414712], [9.357818357293604], [0.9091153934276127], [1.0730432555763452], [36.40287176818285], [0.022987623331641074], [0.9274611581841092], [33.3104273006728], [0.03889281738399335], [85.19351775720091], [2.783862518634571], [0.8052509488366664], [29.911056316703128], [2.2045441381289534], [0.194809862907787], [32.127361466057586], [2.155843595019805]]}}}}
