# Supplementary material
Source: ML conference proceedings conference paper supplement (https://proceedings.neurips.cc/paper_files/paper/2022/hash/31a57804448363bcab777f818f75f5b4-Abstract.html)
Supplement: Supplementary file 1 [file 31a57804448363bcab777f818f75f5b4-Supplemental-Conference.zip › trading_off_resource_budgets_f-Supplementary Material/code_and_data/experiments/base_results/bo_20220228_124924_b7rkpeqg/suggest_log/0114551789985b5181115febb97f8446.json]

{"meta": {"args": {"--uuid": "0114551789985b5181115febb97f8446", "-db-root": "/home/damon_falck/blackboxbandits/experiments/saved_results", "--opt-root": "/home/damon_falck/blackboxbandits/experiments", "--data-root": "/home/damon_falck/blackboxbandits/experiments/penn_datasets", "--db": "bo_20220228_124924_b7rkpeqg", "--opt": "OpenTuner-GA", "--data": "clf-analcatdata-creditscore", "--classifier": "lasso", "--metric": "nll", "--calls": 20, "--suggestions": 1, "--jobs-file": null, "--verbose": false, "dry_run": false, "rev": "bd14afd", "opt_rev": "0.8.7"}, "signature": [[{"C": 1.5676677195506077, "intercept_scaling": 7.257005721594282}, {"C": 2.57663857461359, "intercept_scaling": 1.5119336467641016}, {"C": 0.49501595537331966, "intercept_scaling": 3.833332156156665}, {"C": 0.5627932047415171, "intercept_scaling": 36.905577292137636}, {"C": 71.55682161754872, "intercept_scaling": 0.34179529120610125}], [0.16030737563372063, 0.13567391570625445, 0.28487169606789214, 0.261877171042219, 0.05380163751918128]]},
"data": {"coords": {"iter": {"dims": ["iter"], "attrs": {}, "data": [0, 1, 2, 3, 4, 5, 6, 7, 8, 9, 10, 11, 12, 13, 14, 15, 16, 17, 18, 19]}, "suggestion": {"dims": ["suggestion"], "attrs": {}, "data": [0]}}, "attrs": {}, "dims": {"iter": 20, "suggestion": 1}, "data_vars": {"C": {"dims": ["iter", "suggestion"], "attrs": {}, "data": [[5.8878485441365465], [6.130423230660456], [1.1240782933862967], [5.822062460422792], [9.028810693029351], [9.028810693029351], [9.028810693029351], [2.5060850978526727], [16.315208284020592], [16.315208284020592], [16.315208284020592], [11.96841439157797], [16.315208284020592], [33.7772526067762], [0.670904319597001], [33.7772526067762], [0.8876532873240497], [0.5263331611181146], [71.34932397359022], [33.620183572232634]]}, "intercept_scaling": {"dims": ["iter", "suggestion"], "attrs": {}, "data": [[0.21755659682646278], [2.1546598992314774], [2.1546598992314774], [28.00618302174761], [11.026921711283196], [18.015521789148874], [54.00818211072849], [0.5032286662300665], [27.354194817067174], [5.943286299766438], [13.223471618869397], [3.3340377715120013], [0.020920189218342815], [22.544889265333794], [72.07633908323282], [65.84546111690311], [65.84546111690311], [65.84546111690311], [99.91867259001734], [12.666600719331088]]}}}}
