# Supplementary material
Source: ML conference proceedings conference paper supplement (https://proceedings.neurips.cc/paper_files/paper/2022/hash/31a57804448363bcab777f818f75f5b4-Abstract.html)
Supplement: Supplementary file 1 [file 31a57804448363bcab777f818f75f5b4-Supplemental-Conference.zip › trading_off_resource_budgets_f-Supplementary Material/code_and_data/experiments/base_results/bo_20220228_124924_b7rkpeqg/suggest_log/0770688202035e29999b760a13476ddc.json]

{"meta": {"args": {"--uuid": "0770688202035e29999b760a13476ddc", "-db-root": "/home/damon_falck/blackboxbandits/experiments/saved_results", "--opt-root": "/home/damon_falck/blackboxbandits/experiments", "--data-root": "/home/damon_falck/blackboxbandits/experiments/penn_datasets", "--db": "bo_20220228_124924_b7rkpeqg", "--opt": "OpenTuner-GA", "--data": "clf-auto", "--classifier": "lasso", "--metric": "nll", "--calls": 20, "--suggestions": 1, "--jobs-file": null, "--verbose": false, "dry_run": false, "rev": "bd14afd", "opt_rev": "0.8.7"}, "signature": [[{"C": 1.5676677195506077, "intercept_scaling": 7.257005721594282}, {"C": 2.57663857461359, "intercept_scaling": 1.5119336467641016}, {"C": 0.49501595537331966, "intercept_scaling": 3.833332156156665}, {"C": 0.5627932047415171, "intercept_scaling": 36.905577292137636}, {"C": 71.55682161754872, "intercept_scaling": 0.34179529120610125}], [1.0407592588385761, 1.1140093954219166, 0.9314020593851703, 0.9422101731445011, 1.8905742304595008]]},
"data": {"coords": {"iter": {"dims": ["iter"], "attrs": {}, "data": [0, 1, 2, 3, 4, 5, 6, 7, 8, 9, 10, 11, 12, 13, 14, 15, 16, 17, 18, 19]}, "suggestion": {"dims": ["suggestion"], "attrs": {}, "data": [0]}}, "attrs": {}, "dims": {"iter": 20, "suggestion": 1}, "data_vars": {"C": {"dims": ["iter", "suggestion"], "attrs": {}, "data": [[46.24941626949751], [0.5112638810279095], [0.5112638810279095], [1.287508660259528], [2.2388192695679745], [0.3606925841333659], [0.5112638810279095], [4.920655725053973], [12.312632524529894], [0.94752273124655], [2.5985061220499626], [0.7748292050688528], [0.3607902551440356], [3.0522035261217395], [19.010785725096195], [0.6839525936695807], [0.5112638810279095], [4.9150987884180894], [32.70298684712117], [1.046540303893727]]}, "intercept_scaling": {"dims": ["iter", "suggestion"], "attrs": {}, "data": [[32.01282546004234], [32.01282546004234], [97.56421519230945], [69.5122283531131], [32.01282546004234], [1.1083909556165856], [60.017654605972496], [2.0754023460226523], [67.40823092800906], [32.01282546004234], [52.827390885870706], [32.01282546004234], [32.01282546004234], [32.01282546004234], [32.01282546004234], [32.01282546004234], [5.506970561263666], [32.01282546004234], [32.01282546004234], [0.47424197164558657]]}}}}
