# Supplementary material
Source: ML conference proceedings conference paper supplement (https://proceedings.neurips.cc/paper_files/paper/2022/hash/31a57804448363bcab777f818f75f5b4-Abstract.html)
Supplement: Supplementary file 1 [file 31a57804448363bcab777f818f75f5b4-Supplemental-Conference.zip › trading_off_resource_budgets_f-Supplementary Material/code_and_data/experiments/base_results/bo_20220228_124924_b7rkpeqg/suggest_log/0697222643575312a68e44c193297009.json]

{"meta": {"args": {"--uuid": "0697222643575312a68e44c193297009", "-db-root": "/home/damon_falck/blackboxbandits/experiments/saved_results", "--opt-root": "/home/damon_falck/blackboxbandits/experiments", "--data-root": "/home/damon_falck/blackboxbandits/experiments/penn_datasets", "--db": "bo_20220228_124924_b7rkpeqg", "--opt": "RandomSearch", "--data": "clf-saheart", "--classifier": "lasso", "--metric": "nll", "--calls": 20, "--suggestions": 1, "--jobs-file": null, "--verbose": false, "dry_run": false, "rev": "bd14afd", "opt_rev": "0.0.8"}, "signature": [[{"C": 1.5676677195506077, "intercept_scaling": 7.257005721594282}, {"C": 2.57663857461359, "intercept_scaling": 1.5119336467641016}, {"C": 0.49501595537331966, "intercept_scaling": 3.833332156156665}, {"C": 0.5627932047415171, "intercept_scaling": 36.905577292137636}, {"C": 71.55682161754872, "intercept_scaling": 0.34179529120610125}], [0.8464041147720769, 1.0159224203200323, 0.6029798751272741, 0.615875963207982, 3.3200403276440325]]},
"data": {"coords": {"iter": {"dims": ["iter"], "attrs": {}, "data": [0, 1, 2, 3, 4, 5, 6, 7, 8, 9, 10, 11, 12, 13, 14, 15, 16, 17, 18, 19]}, "suggestion": {"dims": ["suggestion"], "attrs": {}, "data": [0]}}, "attrs": {}, "dims": {"iter": 20, "suggestion": 1}, "data_vars": {"C": {"dims": ["iter", "suggestion"], "attrs": {}, "data": [[25.996636180380474], [0.8832062814131458], [34.43613111953902], [42.849650265798424], [0.13810355814566175], [0.9335316362221779], [0.017230428483283853], [0.7802566147654774], [0.018187968258940552], [25.12633649723973], [12.095149506203368], [37.34994446468377], [0.1468958331727974], [0.38298952822453114], [0.013766470967823505], [0.06215255178517219], [47.47272188310625], [0.10733016197791936], [0.6056155229401291], [0.010782067161432846]]}, "intercept_scaling": {"dims": ["iter", "suggestion"], "attrs": {}, "data": [[3.94952106234509], [0.5014399032447051], [0.011598777591513128], [35.97405403887852], [34.001769700899274], [1.6527794872432422], [0.12952971447328607], [0.028231355805831543], [33.19056924739484], [0.11025128929004738], [0.11839449772312272], [0.04056867151846742], [0.011071957749350514], [0.2802188433492274], [1.4665122247322422], [31.5304258591656], [0.23098709803822648], [0.24177950885919017], [0.12785050923028132], [1.5538322523490085]]}}}}
